# Supplementary material for: Comprehensive Genomic Dependency Landscape of Human Colon Cancer
Source: Research Square preprint supplement (doi:10.21203/rs.3.rs-4438536/v1), 2024-06-04
Supplement: Supplementary file 1 [file 90ab43b7aaf3df37235d3648.xlsx]

## Sheet: all data
HUGO Gene Name	Ensemble Identifier	Empty Anchor Vector_DMSO_Replicate_1_Gene_Expression_TPM	Empty Anchor Vector_DMSO_Replicate_2_Gene_Expression_TPM	Empty Anchor Vector_DMSO_Replicate_3_Gene_Expression_TPM	Empty Anchor Vector_Nutlin_Replicate_1_Gene_Expression_TPM	Empty Anchor Vector_Nutlin_Replicate_2_Gene_Expression_TPM	Empty Anchor Vector_Nutlin_Replicate_3_Gene_Expression_TPM	TP53 Anchor Vector_DMSO_Replicate_1_Gene_Expression_TPM	TP53 Anchor Vector_DMSO_Replicate_2_Gene_Expression_TPM	TP53 Anchor Vector_DMSO_Replicate_3_Gene_Expression_TPM	TP53 Anchor Vector_Nutlin_Replicate_1_Gene_Expression_TPM	TP53 Anchor Vector_Nutlin_Replicate_2_Gene_Expression_TPM	TP53 Anchor Vector_Nutlin_Replicate_3_Gene_Expression_TPM	p-value-Empty Anchor Vector: DMSO vs Nutlin	p-value-TP53 Anchor Vector: DMSO vs Nutlin	p-value- DMSO: Empty Anchor Vector vsTP53 Anchor Vector	p-value- Nutlin: Empty Anchor Vector vsTP53 Anchor Vector
MT-CO1	https://www.ensembl.org/id/ENSG00000198804	15012.3	19236.2	29232.1	26593.4	27832.8	24869.6	19215.1	20529.3	18630	26892.5	21649.9	24061.9	0.336997	0.0744652	0.726551	0.28607
TMSB10	https://www.ensembl.org/id/ENSG00000034510	18525	18164.6	19698.5	13555.5	14450.4	12890.4	17406.7	16559.5	19108.6	14013.6	15304.9	14377.8	0.00133963	0.0343226	0.290736	0.192626
MT-CO2	https://www.ensembl.org/id/ENSG00000198712	8428.92	10743.5	15073.9	15840.2	16335.6	14429.1	10679.5	10738.1	11021.8	14463.4	12162.6	13790	0.16058	0.0569689	0.786513	0.0834465
MT-ND4	https://www.ensembl.org/id/ENSG00000198886	5217.84	7104.69	10957.4	10610.4	10898	9603.14	7654.88	8225.88	8152.5	13387.9	10543.1	12730.3	0.259371	0.034634	0.895759	0.15183
MT-CO3	https://www.ensembl.org/id/ENSG00000198938	7235.44	9056.41	13147.3	10100.1	10290.6	9931.53	7942.99	9124.17	8205.1	9867.87	7255.36	8245.26	0.881871	0.972106	0.512276	0.160135
RPS18	https://www.ensembl.org/id/ENSG00000231500	9831.04	9057.45	9659.71	7732.07	8360.38	7747.77	9716.37	9427.73	10458.8	8754.41	8926.15	8782.13	0.00770539	0.0723038	0.417725	0.0442828
KRT19	https://www.ensembl.org/id/ENSG00000171345	9687.56	9153.85	7163.02	10475.7	10741.4	10323.7	8410	8643.92	6832.56	7482.07	8092.71	7787.86	0.134964	0.792992	0.504403	0.000429549
FTH1	https://www.ensembl.org/id/ENSG00000167996	5835.93	5404.34	6174.96	12177.2	12478.8	11814.4	6197.29	6152.48	6940.82	7130.7	7615.24	7726.3	3.23879e-05	0.0325294	0.140473	6.23278e-05
GAPDH	https://www.ensembl.org/id/ENSG00000111640	9579.94	8583.54	8755.45	4951.17	5369.44	5168.85	9961.6	9985.01	10975.6	7025.52	7739.61	7493.85	0.00264041	0.00354174	0.0428157	0.00200078
RPS2	https://www.ensembl.org/id/ENSG00000140988	7639.72	7339.32	8162.52	6368.65	6960.79	6076.88	8534.93	8368.34	9141.32	7013.53	7431.77	7812.31	0.0248014	0.0185573	0.0451092	0.0530229
RPL41	https://www.ensembl.org/id/ENSG00000229117	7651.64	7140.99	7686	6316.96	6999.55	6047.28	7723	7179.7	8297.97	6874.1	7360.9	7442.65	0.0456218	0.259065	0.558265	0.0949233
S100A6	https://www.ensembl.org/id/ENSG00000197956	6010.44	5866.03	5887.2	8572.24	9104.37	8293.84	5721.34	5497.85	6375.16	6128.68	6522.4	6208.46	0.00600911	0.247234	0.851228	0.00315929
MT-ATP6	https://www.ensembl.org/id/ENSG00000198899	4162.14	5579	7399.59	7734.47	7632.33	6911.53	5390.92	5922.51	5156.09	8477.56	6717.45	7995.63	0.203332	0.0352592	0.836032	0.640319
MT-ATP8	https://www.ensembl.org/id/ENSG00000228253	4103.43	5319.18	6916.32	6814.79	6889.06	6449.31	5517.3	5942.7	5013.76	8637.33	6725.91	8080.08	0.25713	0.0373039	0.962205	0.18778
KRT18	https://www.ensembl.org/id/ENSG00000111057	6815.33	6450.74	5201.89	7753.39	8173.87	7949.05	6116.9	6292.16	5627.33	5116.05	5472.53	5330.53	0.0587298	0.0511601	0.804931	9.11412e-05
MT-ND2	https://www.ensembl.org/id/ENSG00000198763	3454.07	4611.3	6773.39	5372.48	5602.32	5104.23	5071.34	5309.08	5349.61	6952.7	5425.08	6618.8	0.713512	0.139023	0.7893	0.16225
MT-CYB	https://www.ensembl.org/id/ENSG00000198727	3437.49	4482.37	6148.43	6639.81	6935.55	5888.62	4635.94	4971.32	4426.78	6428.23	5131.82	5992.96	0.137744	0.0749646	0.989884	0.26774
MT-ND4L	https://www.ensembl.org/id/ENSG00000212907	2885.03	3966.46	5764.01	5204.65	5550.85	5239.87	4636.92	4778.82	4489.19	8025.27	6397.05	7656.63	0.311062	0.0283223	0.660251	0.0484128
RPL8	https://www.ensembl.org/id/ENSG00000161016	5632.03	5213.81	5573.16	4812.49	5217.48	4746.36	5699.99	5567.44	6021.78	5083.53	5386.85	5293.41	0.0505635	0.0422461	0.197465	0.143757
RPS8	https://www.ensembl.org/id/ENSG00000142937	5925.49	5719.59	5974.99	4667.03	4677.96	4639.77	5695.28	5571.77	5943.68	4984.86	5119.31	4963.1	0.00354864	0.0118018	0.373082	0.0141271
RPL12	https://www.ensembl.org/id/ENSG00000197958	5305.81	5043.71	5500.92	4708.7	4920.86	4794.07	5571.08	5465.02	5957.96	5226.12	5356.79	5318.83	0.0514536	0.127944	0.130352	0.00451651
EEF1A1	https://www.ensembl.org/id/ENSG00000156508	5133.6	4875.98	5164.65	4719.61	5003.63	4843.22	5344.68	5239.61	5751.04	4871.17	5270.05	5105.39	0.175706	0.141001	0.115308	0.193107
RPS12	https://www.ensembl.org/id/ENSG00000112306	5193.98	5012.07	5617.42	4046.07	4434.53	4178.56	5276.37	5312.64	5953.61	5289.33	5379.29	5253.47	0.011687	0.44712	0.44764	0.00628552
HLA-A	https://www.ensembl.org/id/ENSG00000206503	4481.45	4156.96	4722.75	4630.57	4800.8	4526.64	4222.06	4219.92	4918.79	4287.71	4686.38	4538.42	0.357545	0.858451	0.999655	0.359167
RPS27	https://www.ensembl.org/id/ENSG00000177954	4412.12	4280.83	4446.37	4385.89	4513.21	4176.68	4761.66	4608.59	5193.99	3988.8	4470.6	4236.96	0.860055	0.0525959	0.103848	0.503087
KRT8	https://www.ensembl.org/id/ENSG00000170421	5097.44	4561.35	3557.61	4937.79	5158.86	5089.08	4316.66	4276.95	3844.36	3951.79	4291.82	4146.31	0.281915	0.93422	0.631371	0.00246336
EEF1G	https://www.ensembl.org/id/ENSG00000254772	4672.76	4316.38	4381.36	3492.27	3781.09	3523.65	4818.73	4668.51	5178.01	4046.68	4374.44	4317.91	0.00426673	0.0302549	0.0882564	0.00921969
MT-ND5	https://www.ensembl.org/id/ENSG00000198786	2408.72	3517.07	5215.51	3845.49	3773.7	3846.7	3962.56	4163.82	3798.08	5633.63	4360.75	5247.66	0.906697	0.0897023	0.780283	0.0785354
RPL7A	https://www.ensembl.org/id/ENSG00000148303	4225.69	4020.83	4262.86	3504.96	3725.94	3600.85	4384.94	4259.54	4611.61	3960.39	4161.99	4084.29	0.00517949	0.0559456	0.129365	0.0063053
RPS3A	https://www.ensembl.org/id/ENSG00000145425	4418.11	4116.96	4382.34	3281.11	3555.79	3458.34	4199.83	4190.87	4642.54	3893.39	4002.47	3776.3	0.0023921	0.076009	0.839603	0.0125172
EEF2	https://www.ensembl.org/id/ENSG00000167658	3656.28	3291.79	3293.66	3725.7	3789.01	3842.79	4203.01	4205.1	4693.4	3998.02	4178.71	4335.43	0.0823928	0.371605	0.0113534	0.0463095
RPL3	https://www.ensembl.org/id/ENSG00000100316	4180.37	3955.81	3957.7	3496.66	3674.41	3564.8	4086.22	3983.97	4297.32	3532.63	3836.09	3638.98	0.0101477	0.0241129	0.486545	0.439307
RPLP2	https://www.ensembl.org/id/ENSG00000177600	3804.06	3637.32	4094.34	2973.94	3317.74	2902.83	3978.16	3985.32	4489.92	3505.67	3762.06	3669.75	0.013555	0.0791944	0.232819	0.0259562
S100P	https://www.ensembl.org/id/ENSG00000163993	2191.33	2153.97	2808.76	6117.31	6543.31	6043.6	2050.47	2053.34	2837.18	3528.7	3524.22	3476.77	0.000218994	0.0441934	0.843816	0.00297446
ALDOA	https://www.ensembl.org/id/ENSG00000149925	3608.57	3408.1	3774.83	2119.61	2379.29	2152.39	4574.88	4623.37	5374.21	3289.15	3650.62	3594.57	0.000685724	0.0216262	0.0263913	0.00112431
RPS4X	https://www.ensembl.org/id/ENSG00000198034	3819.28	3641.14	3648.53	3219.19	3493.45	3386.1	3621.17	3619.62	3934.88	3134.33	3400.41	3179.99	0.0310713	0.023832	0.864212	0.326342
RPS11	https://www.ensembl.org/id/ENSG00000142534	3666.36	3434.99	3646.6	3061.28	3413.9	3069.08	3628.56	3404.95	3978.73	3377.28	3578.35	3443.03	0.0533174	0.34683	0.665268	0.117875
MT-ND3	https://www.ensembl.org/id/ENSG00000198840	2703.95	2905.92	3859.52	3940.02	4790.98	3892.5	2653.19	2799.07	2811.52	3989.45	3295.53	3683.14	0.0871278	0.0392587	0.37646	0.203257
MT-ND1	https://www.ensembl.org/id/ENSG00000198888	2508.32	3402.8	4891.75	3120.26	3211.01	3015.83	3453.65	3671.26	3202.64	3977.89	3075.03	3666.67	0.557724	0.690282	0.84244	0.222681
RPL39	https://www.ensembl.org/id/ENSG00000198918	3612.7	3244.62	3418.96	2555.83	2933.92	2661.78	3342.26	3257.55	3747.69	3222.98	3318.57	3134.59	0.0103131	0.274334	0.904692	0.0293041
RPS16	https://www.ensembl.org/id/ENSG00000105193	3334.35	3224.21	3534.67	2749.9	2900.26	2718.93	3323.53	3255.78	3700.64	3076.97	3216.72	3186.78	0.0095637	0.186641	0.728877	0.0075302
RPLP0	https://www.ensembl.org/id/ENSG00000089157	3600.06	3257.65	3264.73	2539.16	2647.46	2559.68	3450.14	3417.41	3703.94	3010.67	3209.73	3148.76	0.0139878	0.0269737	0.362187	0.00338251
RPL13A	https://www.ensembl.org/id/ENSG00000142541	3385.82	3151.72	3400.14	2696.13	2774.37	2629.49	3365.16	3274.78	3602.69	2952.66	3040.26	2986.37	0.00659003	0.0424171	0.468795	0.00707207
S100A10	https://www.ensembl.org/id/ENSG00000197747	3438.43	3399.73	3597.43	2866.03	3124.78	2814.18	3256.53	3211.26	3622.09	2488.61	2695.08	2564.28	0.0132202	0.0142327	0.483783	0.0454734
HLA-B	https://www.ensembl.org/id/ENSG00000234745	2536.78	2397.11	2682.18	3475.98	3644.05	3424.56	2643.15	2623.72	3003.09	2937.64	3164.41	3044.61	0.000939044	0.126136	0.225572	0.00748814
MT-ND6	https://www.ensembl.org/id/ENSG00000198695	1839.17	2612.92	3620.74	3130.78	3256.36	3044.86	2488.9	2635.78	2521.97	3564.41	2834.15	3385.55	0.472857	0.0779939	0.809178	0.652034
RPLP1	https://www.ensembl.org/id/ENSG00000137818	3129.94	2965.8	3247.87	2312.45	2495.15	2234.67	3221.2	3170.36	3546.74	2827.28	2943.51	2647.76	0.002445	0.0294774	0.247421	0.0169288
SCD	https://www.ensembl.org/id/ENSG00000099194	2694.37	2942.85	2589.17	1713.99	1625.57	1849.86	3607.23	3710.57	3475.44	3349.35	3483.12	3545.49	0.00250629	0.197911	0.00409633	4.24443e-05
RPL17	https://www.ensembl.org/id/ENSG00000265681	2893.86	2969.58	3214.9	2496	2509.38	2513.42	2976.55	2986.77	3131.06	2928.73	2860.3	2802.95	0.0327024	0.0588118	0.963978	0.00905877
RPS25	https://www.ensembl.org/id/ENSG00000118181	2941.6	2824.86	3040.54	2378.91	2543.2	2387.97	3057.63	2982.02	3299.17	2856.93	3039.95	2847.16	0.00398555	0.169286	0.206735	0.00473056
FTL	https://www.ensembl.org/id/ENSG00000087086	2258.35	2088.48	2490.21	3343.74	3533.1	3261.65	2212.03	2205.5	2623.39	3057.24	3274.14	3266.11	0.00235982	0.0120635	0.726503	0.169039
RPL10A	https://www.ensembl.org/id/ENSG00000198755	2968.59	2829.14	2915.35	2373.45	2506.35	2388.83	3074.55	3102.2	3249.7	2585.41	2673.68	2643.38	0.00118694	0.00415988	0.0281259	0.0188782
ANXA2	https://www.ensembl.org/id/ENSG00000182718	2514.08	2440.65	2442.68	2796.59	2898.02	2872.65	2841.5	2816.2	2975.12	2709.96	2902.94	2768.28	0.000715524	0.329916	0.00546589	0.40772
RPS13	https://www.ensembl.org/id/ENSG00000110700	2760.43	2735.61	3032.01	2408.59	2567.48	2462.05	2852.84	2834.82	3112.88	2734.64	2774.19	2697.42	0.0433036	0.15168	0.525456	0.0176732
EZR	https://www.ensembl.org/id/ENSG00000092820	2696.86	2647.76	2713.37	2444.19	2429.63	2464.87	2886.39	2828.21	2900.93	2558.27	2695.57	2655.77	0.00168684	0.0138059	0.00348584	0.0363529
MIF	https://www.ensembl.org/id/ENSG00000240972	3224.08	2982.85	2985.51	2128.2	2311.53	2121.55	2948.35	2938.1	3198.98	2313.95	2412.42	2339.73	0.00126958	0.00940999	0.775582	0.0965958
RPL7	https://www.ensembl.org/id/ENSG00000147604	2806.4	2718.34	2857.52	2284.2	2347.73	2380.39	2893.74	2699.85	2919.47	2541.3	2834.58	2604.49	0.00129733	0.195143	0.622643	0.0573988
SAT1	https://www.ensembl.org/id/ENSG00000130066	1704.42	1849.34	2180.36	4330.25	4107.58	4261.59	1742.03	1689.59	2000.46	2107.92	2146.59	2098.14	0.000881846	0.0823563	0.59057	0.000582231
RPL5	https://www.ensembl.org/id/ENSG00000122406	2703.8	2653.03	2614.77	2032.02	1990.33	2104.09	2809.12	2774.61	2814.65	2396.79	2481.14	2362.11	0.000185915	0.0041685	0.017098	0.00159152
HLA-C	https://www.ensembl.org/id/ENSG00000204525	2236.96	2117.05	2254.59	2876.76	2940.28	2837.86	2164.88	2184.4	2556.82	2424.46	2550.73	2566.41	0.000401517	0.233132	0.525448	0.00384708
S100A14	https://www.ensembl.org/id/ENSG00000189334	2293.69	2292.95	2681.14	2892.72	3028.03	2766.83	2046.16	1955.28	2336.61	2152.93	2321.96	2214.62	0.0460776	0.424808	0.148711	0.0031356
RPSA	https://www.ensembl.org/id/ENSG00000168028	2752.61	2546.92	2488.29	1726.89	1816.66	1767.47	2626.76	2541.71	2859.94	2283.73	2427.48	2347.45	0.00530947	0.0595804	0.555157	0.000741379
RPL29	https://www.ensembl.org/id/ENSG00000162244	2281.66	2125.46	2239.59	2075.13	2190.06	2089.9	2243.83	2270.72	2453.16	2078.29	2131.94	2085.23	0.179251	0.0683039	0.262248	0.653989
TFF1	https://www.ensembl.org/id/ENSG00000160182	2602.02	2310.32	2412.29	1650.35	1899.95	1747.5	2310.77	2313.72	2115.35	2192.78	2398.99	2271.22	0.00415513	0.668742	0.149488	0.00576302
RPL24	https://www.ensembl.org/id/ENSG00000114391	2303.12	2176.38	2312.81	2056.95	2176.12	2023.05	2255.88	2178.18	2367.39	2059.68	2161.93	2072.31	0.0491765	0.0707401	0.967587	0.835643
PTMA	https://www.ensembl.org/id/ENSG00000187514	2683.39	2677.48	2487.86	1686.91	1730.65	1671.7	2590.93	2399.02	2308.27	1742.38	1900.12	1856.21	0.00290478	0.00703467	0.160662	0.086668
TMSB4X	https://www.ensembl.org/id/ENSG00000205542	2050.92	1688.94	2254.5	2436.14	2641.88	2474.11	1958.09	1917.53	1931.06	2048.2	2228.46	2033.14	0.0734674	0.111349	0.741888	0.00966681
RPL27	https://www.ensembl.org/id/ENSG00000131469	2179.2	2094.81	2276.86	2036.62	2157.19	2017.52	2119.39	2088.98	2191.57	2152.6	2043.84	2087.41	0.175708	0.427612	0.464887	0.679442
RPL21	https://www.ensembl.org/id/ENSG00000122026	2162.64	2135.45	2271.89	1705.22	1775.84	1679.72	2139.54	2146.74	2383.48	2100.62	2118.49	2087.36	0.00129728	0.269087	0.737125	0.00301119
RPL23A	https://www.ensembl.org/id/ENSG00000198242	2075.46	1987.86	2158.82	1639.2	1823.7	1634.97	2191.48	2146.02	2428.67	1923.29	2113.8	1998.94	0.0103734	0.0907412	0.164681	0.0203546
RPS6	https://www.ensembl.org/id/ENSG00000137154	2256.86	2088.38	2211.18	1604.44	1682.75	1649.54	2160.66	2099.24	2285.05	1968.01	2065.89	1947.29	0.00309503	0.0540546	0.961443	0.00263215
RPL26	https://www.ensembl.org/id/ENSG00000161970	1881.98	1903.71	2057.87	1624.78	1692.13	1748.38	1956.37	1978.21	2034	1888.97	1819.3	1767.1	0.0229133	0.0232538	0.542746	0.0529184
HMGA1	https://www.ensembl.org/id/ENSG00000137309	1893.91	1753.85	1693.04	1636.28	1610.16	1539.78	1797.6	1774.65	1963.2	2090.19	2234.31	2291.09	0.070976	0.0129313	0.483227	0.00320074
RPS27A	https://www.ensembl.org/id/ENSG00000143947	1968.33	1954.71	2101.32	1459	1554.97	1507.52	1987.26	2007.59	2075.32	1916.47	1857.36	1821.36	0.00194392	0.0146696	0.794139	0.000798091
RPL35	https://www.ensembl.org/id/ENSG00000136942	2067.12	1911.1	1953.1	1610.59	1681.01	1568.31	1972.68	1907.12	2070.12	1773.08	1822.5	1741.71	0.00470665	0.0319977	0.930149	0.02055
TPT1	https://www.ensembl.org/id/ENSG00000133112	1854.16	1790.39	1961.67	1620.91	1714.13	1659.13	1969.42	1927.3	2051.8	1830.22	1806.36	1818.81	0.0354877	0.0419483	0.14572	0.0238531
MMP1	https://www.ensembl.org/id/ENSG00000196611	1270.09	1100.63	1124.32	4667.31	4764.04	5095.85	481.048	473.888	480.849	752.464	795.115	779.217	0.000282136	0.00127168	0.00582778	0.000926114
RPL4	https://www.ensembl.org/id/ENSG00000174444	1925.65	1809	1796.45	1478.64	1486.48	1504.31	1963.31	1948.21	2087.6	1783.93	1936.58	1818.55	0.011182	0.0745452	0.0613108	0.0144745
RPL13	https://www.ensembl.org/id/ENSG00000167526	1911.85	1775.08	1856.39	1685.15	1757.89	1619.87	1853.83	1816.8	2014.77	1695.73	1815.85	1732.46	0.0465939	0.121438	0.555091	0.322186
RPS17	https://www.ensembl.org/id/ENSG00000182774	1743.47	1704.95	1792.39	1458.48	1521.09	1500.21	1888.35	1879.54	2010.07	1768.08	1733.47	1707.05	0.00183199	0.0313972	0.0307527	0.000684514
ACTB	https://www.ensembl.org/id/ENSG00000075624	2084.26	1966.16	1700.27	1583.53	1786.52	1637.75	1709.96	1762.35	1522.23	1515.85	1592.43	1595.79	0.14845	0.315222	0.147438	0.23209
S100A11	https://www.ensembl.org/id/ENSG00000163191	1617.64	1545.19	1485.86	2457.53	2648.65	2390.19	1438.07	1405.51	1406.52	1223.3	1314.33	1316.94	0.00182851	0.0387261	0.0640089	0.00140779
GSTP1	https://www.ensembl.org/id/ENSG00000084207	1536.03	1459.07	1379.12	2635.7	2857.58	2667.84	1217.72	1217.62	1241.67	1296.03	1371.13	1345.29	0.000275245	0.0257252	0.0326377	0.00112084
TAGLN2	https://www.ensembl.org/id/ENSG00000158710	1785.41	1679.11	1792.13	1031.14	1094.87	1046.08	1917.47	1899.8	1990.01	1845.45	1925.55	1899.94	0.000435859	0.280626	0.0185534	1.51287e-05
RPL18	https://www.ensembl.org/id/ENSG00000063177	1707.41	1603.82	1794.18	1452.24	1601.08	1437.45	1727.55	1675.34	1934.75	1571.11	1663.76	1646.66	0.0542474	0.186364	0.472281	0.113722
ACTG1	https://www.ensembl.org/id/ENSG00000184009	1830.92	1691.31	1437.97	1000.1	1081.17	1033.52	1989.56	2027.05	1869.42	1743.08	1875.84	1857.25	0.0290548	0.0976102	0.0999605	0.000355235
RPL11	https://www.ensembl.org/id/ENSG00000142676	1681.4	1643.98	1720.78	1391.89	1475.04	1391.24	1702.41	1637.29	1821.11	1486.66	1622.1	1499.85	0.00216659	0.0586301	0.563746	0.0964245
RPL6	https://www.ensembl.org/id/ENSG00000089009	1826.59	1714.28	1715.09	1405.6	1416.88	1442.19	1735.57	1594.34	1722.61	1457.75	1562.72	1460.66	0.00830793	0.0314304	0.312978	0.163033
LCN2	https://www.ensembl.org/id/ENSG00000148346	1283.68	1145.2	932.982	3270.19	3451.63	3256.08	715.235	760.865	566.816	1020.9	1102.99	1083.85	0.000181847	0.011971	0.030032	0.000167948
CDKN1A	https://www.ensembl.org/id/ENSG00000124762	294.176	269.701	272.267	5742.7	5597.53	5826.75	62.3329	58.6908	75.2199	76.3084	75.8691	79.3045	0.000125392	0.138382	7.08636e-05	0.000140108
RPS15	https://www.ensembl.org/id/ENSG00000115268	1647.87	1529.93	1659.83	1290.5	1422.36	1265	1666.33	1621.32	1809.03	1446.78	1522.93	1526.68	0.0116681	0.0535183	0.291359	0.0509409
EIF4A2	https://www.ensembl.org/id/ENSG00000156976	1378.81	1329.97	1596.13	1315.81	1339.81	1381.46	1626.85	1577.08	1779.96	1655.23	1708.21	1661.21	0.389784	0.847629	0.0963535	0.000229793
HSP90AB1	https://www.ensembl.org/id/ENSG00000096384	1376.76	1321.86	1377.79	1241.46	1285.78	1301.95	1606.02	1596.37	1738.8	1670.17	1761.46	1774.94	0.0333035	0.199861	0.0144029	0.000993003
PKM	https://www.ensembl.org/id/ENSG00000067225	1701.18	1589.22	1357.16	1464.18	1544.04	1530.28	1686.46	1673.29	1547.91	1238.42	1320.75	1301.52	0.757504	0.0053347	0.49501	0.00296932
RPS7	https://www.ensembl.org/id/ENSG00000171863	1627.27	1531.39	1606.26	1289.05	1284.42	1278.09	1566.81	1534.12	1637.74	1436.87	1446.69	1384.39	0.00840871	0.0176739	0.845913	0.0167932
RPL18A	https://www.ensembl.org/id/ENSG00000105640	1545.17	1424.31	1539.4	1149.03	1175.11	1113.35	1605.07	1580.92	1879.22	1409.22	1475.75	1490.51	0.00482112	0.13038	0.182611	0.000858206
RPL10	https://www.ensembl.org/id/ENSG00000147403	1475.81	1344.11	1439.26	1328.61	1385.8	1328.95	1569.85	1561.23	1682.56	1371.57	1454.62	1426.51	0.201042	0.021791	0.0289321	0.0909637
RPS14	https://www.ensembl.org/id/ENSG00000164587	1518.16	1461.14	1581.01	1151.44	1293.64	1182.07	1583.4	1447.35	1640.55	1374.69	1435.27	1393.58	0.00566237	0.101788	0.615902	0.0326349
AGR2	https://www.ensembl.org/id/ENSG00000106541	1446.64	1428.12	1432.54	1097.78	1173.03	1150.76	1442.79	1466.82	1463.71	1501.29	1625.78	1521.65	0.00377311	0.135483	0.0846316	0.00208418
ENO1	https://www.ensembl.org/id/ENSG00000074800	1795.73	1690.17	1301.11	721.624	792.473	764.547	1811.23	1836.75	1595.67	1215.1	1327.66	1267.58	0.0289439	0.0138533	0.434091	0.000491717
UBC	https://www.ensembl.org/id/ENSG00000150991	1243.3	1044.72	1049.46	1249.75	1232.55	1341.04	1340.43	1330.89	1453.94	1572.99	1588.95	1532.61	0.115342	0.0267602	0.0358986	0.00488004
TXNIP	https://www.ensembl.org/id/ENSG00000265972	1131.11	1086.14	1271.39	970.937	924.135	1035.55	1421.21	1416.39	1696.19	1438.04	1522.09	1501.98	0.0584094	0.823725	0.0425289	0.000329958
SLC25A6	https://www.ensembl.org/id/ENSG00000169100	1303.42	1239.69	1251.96	1304.79	1331.18	1250.28	1193.62	1165.45	1269.21	1198.88	1289.56	1291.57	0.38157	0.309845	0.216383	0.415402
RPS21	https://www.ensembl.org/id/ENSG00000171858	1391.22	1317.5	1442.4	1133.19	1216.17	1065.49	1253.95	1286.18	1403.22	1211.11	1113.38	1140.2	0.0132587	0.0507231	0.301786	0.769357
PPDPF	https://www.ensembl.org/id/ENSG00000125534	1213.27	1157.84	1327.15	1172.39	1270.14	1094.51	1194.74	1213.91	1392.27	1192.61	1268.86	1330.59	0.492236	0.97063	0.692808	0.262221
LDHA	https://www.ensembl.org/id/ENSG00000134333	1588.11	1457.18	1263.49	727.791	768.001	759.383	1631.05	1653.05	1505.98	1010.86	1130.47	1066.57	0.0171363	0.0010877	0.226639	0.00636978
INSIG1	https://www.ensembl.org/id/ENSG00000186480	929.332	966.538	1154.57	581.096	530.749	583.168	1424.46	1399.94	1743.53	1696.08	1663.44	1709.67	0.0182585	0.269217	0.024767	1.46774e-06
RPL19	https://www.ensembl.org/id/ENSG00000108298	1303.93	1217.07	1235.88	1052.8	1102.77	1054.04	1250.17	1200.14	1336.62	1155.91	1216.96	1157.47	0.00719856	0.15265	0.845684	0.0158433
RPL30	https://www.ensembl.org/id/ENSG00000156482	1206.65	1106.41	1179.02	953.751	1017.25	968.231	1296.66	1255.8	1387.01	1153.59	1301.75	1224.12	0.0100486	0.208369	0.0414191	0.0162309
CALR	https://www.ensembl.org/id/ENSG00000179218	1238.81	1141.3	1116.8	1130.96	1220.3	1161.75	1183.96	1167.81	1099.37	1011.84	1110.7	1117.4	0.91248	0.180883	0.755674	0.106449
RPL36A	https://www.ensembl.org/id/ENSG00000241343	1222.44	1158	1206.1	1022.48	1059.27	974.147	1223.3	1189.74	1320.11	1049.65	1184.05	1091.1	0.00570856	0.0710627	0.34595	0.141679
SPINT2	https://www.ensembl.org/id/ENSG00000167642	1173.21	1155.84	1338.4	980.8	1015.81	928.488	1137.82	1126.86	1273.83	1081.48	1150.02	1152.74	0.0353262	0.402995	0.598274	0.0115002
CHCHD2	https://www.ensembl.org/id/ENSG00000106153	1131.14	1058.32	1093.62	1212.67	1252.76	1186.81	1007.85	1003.14	1056.08	1063.15	1120.13	1080.07	0.0126425	0.052089	0.0585997	0.00743305
CIB1	https://www.ensembl.org/id/ENSG00000185043	951.361	931.969	1192.02	1036.2	1042.59	964.06	994.244	939.764	1226.05	1270.96	1314.81	1332.67	0.911064	0.0966408	0.827312	0.00109936
SLC2A1	https://www.ensembl.org/id/ENSG00000117394	1305.95	1248.75	992.962	1127.36	1253.88	1193.45	1277.83	1359.44	1071.92	688.213	783.099	754.243	0.9366	0.0202449	0.697541	0.000842151
COX6A1	https://www.ensembl.org/id/ENSG00000111775	1134.21	1015.53	1063.33	1120.42	1258.16	1124.98	1008.45	944.312	1056.31	1073.26	1142.25	1103.57	0.168546	0.0652477	0.224494	0.308572
RPS3	https://www.ensembl.org/id/ENSG00000149273	1204.03	1148.16	1225.49	766.177	853.21	767.503	1224.29	1193.03	1340.7	1020.78	1074.55	1038.34	0.00053958	0.0322495	0.319876	0.00421404
NQO1	https://www.ensembl.org/id/ENSG00000181019	935.136	931.166	934.601	1430.51	1476.66	1460.38	754.543	750.593	803.901	1012.48	1063.63	1042.43	0.00060958	0.000320633	0.0104581	3.41138e-05
RPS10	https://www.ensembl.org/id/ENSG00000124614	1154.86	1092.96	1102.19	890.637	981.379	919.61	1121.88	1097.54	1174.17	975.811	1001.75	983.522	0.00643301	0.0157686	0.651232	0.161369
OAZ1	https://www.ensembl.org/id/ENSG00000104904	1262.13	1164.76	1075.89	1010.44	984.468	959.427	1082.36	1114.13	1046.47	908.429	941.287	934.507	0.067709	0.00619261	0.243914	0.0399102
MSMO1	https://www.ensembl.org/id/ENSG00000052802	925.921	922.069	1123	656.149	652.812	712.8	1119.82	1120.69	1463.35	1255.57	1224.11	1268.86	0.0328311	0.908628	0.155773	4.59501e-05
GPX2	https://www.ensembl.org/id/ENSG00000176153	954.826	949.757	983.608	1464.06	1549.54	1448.72	844.618	829.061	855.084	802.688	856.071	850.867	0.00158316	0.756045	0.00119803	0.000305442
YWHAE	https://www.ensembl.org/id/ENSG00000108953	1198.79	1118.28	1052.76	891.096	914.022	926.345	1074.18	1049.05	1075.41	964.694	1063.7	1007.74	0.0312121	0.192442	0.307911	0.0577763
RACK1	https://www.ensembl.org/id/ENSG00000204628	1033.54	964.903	938.86	820.273	867.075	817.667	1213.82	1212.02	1285.63	1008.72	1080.62	1052.58	0.0189471	0.00433588	0.00246921	0.00169187
SLC25A5	https://www.ensembl.org/id/ENSG00000005022	1027.03	1018.37	1030.71	1017.83	1089.17	1010.62	935.076	939.192	1069.43	1001.66	1054.48	1066.48	0.637746	0.311768	0.422543	0.961181
TXN	https://www.ensembl.org/id/ENSG00000136810	1054.82	1064.05	970.042	955.225	968.554	931.857	975.745	950.845	959.015	1075.53	1164.53	1096.53	0.108761	0.0239451	0.145076	0.0163747
PHLDA2	https://www.ensembl.org/id/ENSG00000181649	696.48	683.31	750.684	1014.9	1003.71	971.616	801.939	775.921	985.08	1456.83	1479.03	1541.52	0.000747631	0.00505756	0.150641	0.000429634
TKT	https://www.ensembl.org/id/ENSG00000163931	808.856	752.6	787.182	1352.1	1379.68	1353.43	853.01	848.298	981.36	937.247	977.319	992.819	5.70577e-05	0.221551	0.111701	0.00020243
PSAP	https://www.ensembl.org/id/ENSG00000197746	985.162	922.746	988.248	997.391	1021.98	991.161	1010.94	1026.05	1162.15	901.91	990.346	975.241	0.208766	0.134544	0.15865	0.216549
NPM1	https://www.ensembl.org/id/ENSG00000181163	1014.19	1022.67	1049.71	725.304	737.664	756.067	1174.5	1114.53	1193.36	1027.87	1100.94	1035.44	4.08091e-05	0.033149	0.0178504	0.00215193
RPL9	https://www.ensembl.org/id/ENSG00000163682	1078.85	1018.92	1068.07	844.591	921.271	877.544	1017	1017.36	1106.9	1003.78	1010.46	949.426	0.00423281	0.183672	0.82922	0.0229694
ADIRF	https://www.ensembl.org/id/ENSG00000148671	1184.18	1122.79	1322.99	856.714	917.326	821.375	917.888	896.429	1030.25	857.749	925.914	882.416	0.0151436	0.290235	0.0269494	0.5347
ATP5F1B	https://www.ensembl.org/id/ENSG00000110955	986.654	969.94	790.158	944.214	952.987	967.356	972.332	1026.23	892.527	1069.73	1062.26	1052.38	0.596825	0.125886	0.557275	0.000351448
RPS28	https://www.ensembl.org/id/ENSG00000233927	984.331	953.092	1016.97	818.811	929.637	788.66	1066.64	1044.51	1166.91	881.541	936.83	936.083	0.0663272	0.0269318	0.0849365	0.227485
PABPC1	https://www.ensembl.org/id/ENSG00000070756	952.505	945.704	930.262	808.625	777.864	834.978	1090.07	1096.58	1073.87	943.111	986.455	967.553	0.00736773	0.00313397	0.000107598	0.00206632
MT2A	https://www.ensembl.org/id/ENSG00000125148	982.201	988.463	1046.56	562.138	576.093	500.491	1257.6	1262.92	1406.4	871.583	962.362	918.696	0.000132852	0.00539644	0.0141448	0.00048285
LYZ	https://www.ensembl.org/id/ENSG00000090382	1189.91	1160.13	1120.68	1273.35	1370.9	1374.5	665.652	667.304	651.278	591.304	608.313	589.75	0.0146102	0.00127334	0.000918535	0.00149772
GPX1	https://www.ensembl.org/id/ENSG00000233276	461.855	442.595	444.097	2558.73	2730.32	2469.04	335.287	339.769	343.294	360.464	388.044	367.275	0.00120609	0.0506182	0.00113595	0.00106656
TPI1	https://www.ensembl.org/id/ENSG00000111669	1148.05	1116.19	1014.21	679.264	738.368	680.675	1082.17	1068.08	1060.88	803.952	906.158	868.567	0.0036294	0.0161932	0.635655	0.015272
UBB	https://www.ensembl.org/id/ENSG00000170315	987.149	917.969	888.675	924.919	970.902	946.607	868.558	849.893	887.397	938.947	984.499	974.128	0.650388	0.0060561	0.154083	0.391349
EIF1	https://www.ensembl.org/id/ENSG00000173812	827.06	765.57	974.342	777.933	782.335	761.414	909.832	887.596	1227.72	1036.15	1063.39	1080.62	0.317271	0.685278	0.308739	0.000334966
MYL12B	https://www.ensembl.org/id/ENSG00000118680	1019.02	956.632	942.185	949.861	991.468	959.241	889.517	883.765	880.558	848.265	900.149	864.656	0.843121	0.469497	0.0631735	0.0092484
SH3BGRL3	https://www.ensembl.org/id/ENSG00000142669	844.287	785.97	978.121	952.988	1056.89	906.067	836.393	817.673	1079.36	876.17	947.803	972.259	0.232811	0.832327	0.705626	0.500491
RPS5	https://www.ensembl.org/id/ENSG00000083845	996.168	900.556	899.69	805.38	878.167	830.818	991.552	963.595	1031.01	854.509	878.802	888.184	0.0803453	0.0118057	0.181792	0.231809
MYL12A	https://www.ensembl.org/id/ENSG00000101608	880.441	865.217	887.644	934.256	991.146	931.55	853.125	844.186	878.167	855.101	908.726	892.908	0.0496297	0.236593	0.198765	0.0588169
TM4SF1	https://www.ensembl.org/id/ENSG00000169908	642.838	635.989	572.65	996.566	880.648	990.343	894.835	888.351	755.045	1152.87	1163.23	1091.76	0.00335025	0.011581	0.0217171	0.0222401
RPS23	https://www.ensembl.org/id/ENSG00000186468	854.313	825.964	874.623	707.561	780.346	693.117	1030.57	968.798	1090.16	896.999	982.845	936.802	0.0261068	0.109074	0.0240349	0.00454929
HSP90AA1	https://www.ensembl.org/id/ENSG00000080824	1100.14	1079.94	856.693	872.415	873.921	930.28	874.085	898.635	822.902	763.629	802.753	758.107	0.260666	0.0347509	0.193602	0.00954202
H2AZ1	https://www.ensembl.org/id/ENSG00000164032	1107.98	1108.4	1001.08	533.036	556.915	517.84	1063.21	1041	1072.36	828.343	879.066	852.329	0.00220672	0.000709343	0.743561	0.000103516
CLIC1	https://www.ensembl.org/id/ENSG00000213719	949.126	906.822	869.422	693.843	722.956	676.565	966.855	952.968	944.456	928.042	983.627	966.213	0.00322144	0.816254	0.174823	0.00030873
PPIB	https://www.ensembl.org/id/ENSG00000166794	952.06	884.429	908.076	825.633	880.963	828.091	871.887	852.953	867.062	837.342	890.523	836.722	0.059927	0.66744	0.114699	0.714475
BTF3	https://www.ensembl.org/id/ENSG00000145741	875.849	815.624	834.814	771.717	819.055	805.924	956.918	934.439	979.999	811.31	882.857	838.201	0.133242	0.0150683	0.00810453	0.156877
RPS24	https://www.ensembl.org/id/ENSG00000138326	920.754	865.062	889.344	774.692	813.444	795.393	908.562	877.63	957.698	801.964	875.164	809.083	0.0103808	0.0596843	0.469487	0.280918
RPL22	https://www.ensembl.org/id/ENSG00000116251	863.209	829.009	884.979	603.428	653.209	632.933	1037.42	1012.09	1068.24	864.458	942.645	884.428	0.000495702	0.0102424	0.00143311	0.00148924
FDFT1	https://www.ensembl.org/id/ENSG00000079459	678.106	695.412	689.544	1055.02	1065.63	1098.07	732.637	730.604	783.061	900.889	908.099	929.776	0.000274982	0.00354871	0.0605587	0.000986473
CYSTM1	https://www.ensembl.org/id/ENSG00000120306	960.461	885.445	996.208	758.348	774.161	759.951	739.912	706.826	781.853	931.036	984.33	951.738	0.0279232	0.00201243	0.00936351	0.00345044
DDIT4	https://www.ensembl.org/id/ENSG00000168209	704.568	747.948	720.572	629.138	640.38	643.034	931.34	982.086	1221.54	977.463	987.022	1026.67	0.0134172	0.647566	0.0671019	0.000871894
DYNLT1	https://www.ensembl.org/id/ENSG00000146425	964.178	998.709	921.439	989.571	1008.7	1000.6	795.138	769.872	709.116	685.639	691.513	662.444	0.225413	0.0791109	0.00411524	3.19629e-05
HNRNPA1	https://www.ensembl.org/id/ENSG00000135486	973.708	1004.24	959.826	615.491	621.982	607.245	980.521	963.255	962.21	790.444	840.12	796.02	0.000490436	0.0045953	0.518841	0.00412417
UQCRH	https://www.ensembl.org/id/ENSG00000173660	923.425	914.347	914.875	795.567	844.199	813.658	803.461	776.897	842.047	810.529	862.8	803.792	0.0164216	0.53003	0.0259365	0.754139
EIF4B	https://www.ensembl.org/id/ENSG00000063046	811.731	817.17	849.927	675.406	640.538	689.838	963.157	962.587	1027.87	849.192	903.691	895.622	0.00133387	0.0230841	0.00692706	0.000743002
YBX1	https://www.ensembl.org/id/ENSG00000065978	943.591	915.799	933.794	654.366	671.503	648.561	895.769	885.929	923.691	813.217	889.26	890.343	1.74315e-05	0.278936	0.110599	0.0107579
GDF15	https://www.ensembl.org/id/ENSG00000130513	280.355	220.431	278.808	2932.2	2906.96	2807.23	54.0441	56.847	70.6204	152.953	140.161	156.375	9.75277e-06	0.000233213	0.00668482	0.000155773
COX8A	https://www.ensembl.org/id/ENSG00000176340	814.447	792.31	844.191	784.139	850.17	729.88	780.159	748.709	881.539	892.333	959.007	945.084	0.505969	0.065311	0.776232	0.0332631
EEF1B2	https://www.ensembl.org/id/ENSG00000114942	894.895	827.965	787.109	660.382	706.136	694.468	903.141	868.652	954.123	880.808	946.43	874.293	0.0267934	0.822193	0.150457	0.00303588
NDRG1	https://www.ensembl.org/id/ENSG00000104419	861.887	815.653	915.675	506.983	501.026	524.099	1093.22	1075.08	1098.58	828.211	883.685	883.03	0.0046315	0.00282133	0.0123323	0.000920977
RPL36	https://www.ensembl.org/id/ENSG00000130255	859.803	790.788	832.316	744.029	814.505	737.736	861.427	842.21	951.117	808.799	851.012	831.516	0.124492	0.241127	0.231948	0.100911
IGFBP3	https://www.ensembl.org/id/ENSG00000146674	1344.65	1312.75	987.041	740.842	687.305	784.619	975.413	1004.66	631.262	448.292	520.916	454.148	0.0458852	0.075704	0.106265	0.00224225
C19orf33	https://www.ensembl.org/id/ENSG00000167644	922.262	916.873	941.356	767.05	756.455	753.215	832.243	813.578	912.58	747.7	757.429	691.773	0.000209474	0.0366991	0.128005	0.322149
CALM2	https://www.ensembl.org/id/ENSG00000143933	846.708	860.136	888.596	693.469	703.186	702.413	842.192	830.624	906.614	796.416	811.196	778.717	0.0036414	0.0976882	0.854143	0.00529746
HSP90B1	https://www.ensembl.org/id/ENSG00000166598	876.762	808.828	770.426	579.04	567.679	614.892	917.055	912.247	905.027	789.292	840.362	821.598	0.00814435	0.0196052	0.0945381	0.000372332
PPIA	https://www.ensembl.org/id/ENSG00000196262	947.472	910.473	825.582	648.223	674.399	640.789	889.004	867.541	838.511	652.671	696.19	668.963	0.0161042	0.00063592	0.510619	0.330364
RPL34	https://www.ensembl.org/id/ENSG00000109475	855.636	828.17	867.69	710.369	760.944	703.934	775.561	743.673	839.356	712.902	715.339	660.951	0.0068343	0.0649487	0.136338	0.320075
RPS19	https://www.ensembl.org/id/ENSG00000105372	830.792	778.103	859.023	974.915	1053.89	931.542	649.348	615.647	724.356	556.429	601.571	583.946	0.0243162	0.10938	0.0190588	0.00364055
HSPA5	https://www.ensembl.org/id/ENSG00000044574	761.415	638.03	662.757	742.289	769.326	774.026	823.489	826.889	819.338	735.525	795.16	781.01	0.180549	0.0974409	0.0686234	0.69983
HLA-E	https://www.ensembl.org/id/ENSG00000204592	615.587	598.791	678.732	747.269	736.557	756.053	735.371	715.633	821.449	880.82	914.183	917.402	0.0358561	0.0338357	0.039571	0.00145901
EPCAM	https://www.ensembl.org/id/ENSG00000119888	835.049	827.741	883.304	552.352	543.749	565.478	785.759	744.931	864.372	817.981	850.407	815.838	0.00136761	0.491379	0.290558	0.000160076
CSTB	https://www.ensembl.org/id/ENSG00000160213	799.681	758.167	754.072	707.301	746.443	697.027	713.607	715.495	769.465	764.116	812.871	788.347	0.0624325	0.0780603	0.185261	0.0257608
NME2	https://www.ensembl.org/id/ENSG00000243678	822.566	783.563	805.78	643.573	685.396	616.259	731.214	736.425	809.967	776.922	809.412	796.965	0.00570207	0.299296	0.213767	0.00842913
ATP1B1	https://www.ensembl.org/id/ENSG00000143153	625.499	628.829	626.531	760.495	755.252	812.203	800.549	793.432	734.062	801.491	856.839	815.113	0.0143379	0.149314	0.0192286	0.121028
BSG	https://www.ensembl.org/id/ENSG00000172270	825.771	753.384	791.303	620.651	674.85	627.32	783.889	773.163	880.777	718.062	775.301	781.739	0.00586042	0.259379	0.611175	0.012114
APP	https://www.ensembl.org/id/ENSG00000142192	698.872	638.997	632.827	773.989	762.173	833.754	871.191	829.975	862.897	667.779	720.993	711.592	0.0121948	0.00220068	0.00290154	0.0350264
ANXA5	https://www.ensembl.org/id/ENSG00000164111	745.985	714.747	778.909	590.822	607.259	606.045	755.474	742.799	823.568	824.831	900.8	887.25	0.0110906	0.0476728	0.433106	0.00547763
RPL36AL	https://www.ensembl.org/id/ENSG00000165502	777.137	772.358	804.263	793.161	870.943	771.491	699.64	672.513	722.379	632.463	711.69	654.464	0.467106	0.324382	0.0106029	0.0211786
PFN1	https://www.ensembl.org/id/ENSG00000108518	873.818	849.095	768.179	647.545	712.059	621.112	759.48	739.77	743.145	678.476	738.196	714.582	0.0160676	0.156273	0.116905	0.205139
PRDX5	https://www.ensembl.org/id/ENSG00000126432	694.166	673.976	763.197	736.818	798.754	709.8	665.206	604.848	708.795	783.862	846.064	853.641	0.37065	0.0131619	0.278235	0.0840534
ATP5ME	https://www.ensembl.org/id/ENSG00000169020	750.637	763.032	736.297	675.495	739.423	700.886	677.949	680.265	723.803	763.866	790.247	766.953	0.123752	0.0168343	0.0445886	0.0491706
RPL38	https://www.ensembl.org/id/ENSG00000172809	748.318	710.908	761.33	625.568	713.522	607.235	772.158	743.282	816.743	704.873	773.712	735.376	0.0909403	0.24893	0.23564	0.0947188
ARF1	https://www.ensembl.org/id/ENSG00000143761	702.512	645.17	710.213	669.416	682.469	689.564	680.357	681.293	812.64	769.551	794.361	832.514	0.818309	0.22841	0.485301	0.0158695
RPL23	https://www.ensembl.org/id/ENSG00000125691	764.777	742.856	745.307	558.449	564.901	562.749	824.419	811.009	847.958	713.815	772.832	727.369	0.000671907	0.0190785	0.00642289	0.00951198
RPL35A	https://www.ensembl.org/id/ENSG00000182899	756.252	745.932	758.57	606.461	657.616	608.281	763.523	734.71	825.573	701.232	747.196	715.178	0.0128455	0.174816	0.516148	0.0119153
RPS26	https://www.ensembl.org/id/ENSG00000197728	760.044	712.838	749.128	663.494	729.92	666.278	725.089	687.928	763.619	687.694	752.171	686.789	0.116432	0.616792	0.597993	0.506743
HMGCS1	https://www.ensembl.org/id/ENSG00000112972	543.551	673.077	594.483	423.267	345.468	447.991	899.265	915.428	829.472	1020.22	910.552	908.714	0.0164632	0.231324	0.00537885	0.000419235
CA9	https://www.ensembl.org/id/ENSG00000107159	988.387	948.322	981.11	123.997	131.499	130.35	1143.62	1166.02	1149.76	540.463	594.25	572.24	0.000133095	0.000117155	0.000881199	0.00101111
LDHB	https://www.ensembl.org/id/ENSG00000111716	857.126	852.262	708.872	574.375	614.547	581.286	767.98	758.411	728.282	631.874	701.587	647.864	0.0400476	0.0299758	0.379322	0.0581744
PGK1	https://www.ensembl.org/id/ENSG00000102144	951.169	928.182	785.259	411.567	411.168	442.714	935.086	959.117	798.962	581.781	624.339	589.585	0.00988564	0.0209636	0.90118	0.000581981
TNFRSF6B	https://www.ensembl.org/id/ENSG00000243509	523.216	535.47	609.18	1098.51	1045.82	1056.16	335.201	336.463	330.869	799.425	794.129	828.339	0.000299329	0.000377135	0.0140599	0.000412796
TUBA1B	https://www.ensembl.org/id/ENSG00000123416	1003.2	915.569	757.872	302.573	319.108	313.493	844.672	861.655	972.003	616.827	670.712	638.997	0.0146189	0.0146869	0.99494	0.00101664
RPL37A	https://www.ensembl.org/id/ENSG00000197756	711.355	697.39	746.425	580.583	655.392	561.141	718.892	688.438	775.764	633.388	691.517	652.886	0.0348295	0.100101	0.771638	0.162074
RPL15	https://www.ensembl.org/id/ENSG00000174748	733.719	685.175	672.58	587.013	593.851	594.712	756.675	740.7	760.793	641.639	687.263	654.056	0.0281995	0.0108159	0.0844987	0.0332668
LGALS3	https://www.ensembl.org/id/ENSG00000131981	730.399	689.703	685.284	695.423	676.289	690.354	635.767	626.73	637.849	653.691	677.293	661.086	0.428044	0.0308611	0.0354398	0.0631577
TUBB4B	https://www.ensembl.org/id/ENSG00000188229	914.739	804.928	668.185	419.381	416.435	428.051	773.249	800.652	857.403	610.577	631.281	617.494	0.034105	0.0126094	0.862484	6.18843e-05
TINAGL1	https://www.ensembl.org/id/ENSG00000142910	713.946	687.37	671.023	646.395	562.921	642.301	728.526	736.826	705.293	619.984	618.105	609.151	0.0965829	0.0037395	0.109882	0.962204
RPS9	https://www.ensembl.org/id/ENSG00000170889	740.418	677.015	716.69	559.751	597.125	545.935	703.895	691.119	796.4	617.424	644.813	611.068	0.00435838	0.074342	0.648292	0.0439567
DAD1	https://www.ensembl.org/id/ENSG00000129562	670.102	606.715	660.511	656.916	699.635	623.927	592.944	575.272	663.453	651.64	714.117	671.666	0.65148	0.112536	0.355962	0.544561
NOP53	https://www.ensembl.org/id/ENSG00000105373	648.319	608.616	672.827	594.653	590.545	571.405	718.484	699.329	753.541	623.061	657.564	644.267	0.0761786	0.0172106	0.0316316	0.0131824
EIF5A	https://www.ensembl.org/id/ENSG00000132507	826.343	779.023	646.592	578.002	621.215	556.937	662.753	689.856	628.66	564.448	614.371	583.81	0.0783922	0.0352733	0.230035	0.932527
LGALS4	https://www.ensembl.org/id/ENSG00000171747	813.731	759.9	790.484	522.681	548.837	551.246	574.1	568.192	637.932	636.586	660.855	646.061	0.000571554	0.124607	0.0030714	0.00101258
ANP32B	https://www.ensembl.org/id/ENSG00000136938	736.171	748.476	803.696	446.278	458.35	441.97	704.837	660.105	746.23	630.586	675.252	648.707	0.00293494	0.159199	0.144672	0.00155518
CD164	https://www.ensembl.org/id/ENSG00000135535	624.064	615.13	650.195	519.059	475.309	536.538	684.209	694.386	689.182	724.945	744.078	712.941	0.00903857	0.0415996	0.0231935	0.0019411
EPHA2	https://www.ensembl.org/id/ENSG00000142627	476.034	429.154	432.133	804.941	767.966	826.725	524.777	517.508	572.211	720.214	726.808	776.208	0.000112554	0.00118727	0.0161221	0.0753889
CEACAM6	https://www.ensembl.org/id/ENSG00000086548	666.929	638.851	559.641	940.12	944.483	1011.8	452.48	486.673	446.381	428.254	466.866	463.468	0.00146987	0.636587	0.0257835	0.000266576
S100A16	https://www.ensembl.org/id/ENSG00000188643	687.984	660.996	643.612	636.337	658.609	637.204	589.439	581.403	601.075	576.344	610.355	605.228	0.263034	0.617026	0.0169428	0.0270408
TMBIM6	https://www.ensembl.org/id/ENSG00000139644	689.78	640.115	602.4	464.745	471.159	500.664	715.496	708.072	710.662	633.971	669.774	667.059	0.0120628	0.0378467	0.115962	0.000370512
PGAM1	https://www.ensembl.org/id/ENSG00000171314	808.386	814.361	633.263	633.212	665.986	654.606	662.727	683.353	565.943	419.561	466.774	452.646	0.22986	0.0225863	0.189346	0.000527018
KLK6	https://www.ensembl.org/id/ENSG00000167755	860.697	834.396	763.153	476.724	495.932	483.519	692.385	693.085	734.902	447.275	495.834	479.792	0.00600597	0.000315937	0.0425714	0.529354
COX5B	https://www.ensembl.org/id/ENSG00000135940	598.905	569.172	542.32	593.148	660.613	590.403	593.22	572.23	628.765	663.279	701.078	693.717	0.196283	0.0152814	0.295282	0.0705899
F3	https://www.ensembl.org/id/ENSG00000117525	678.741	747.058	487.191	862.305	709.302	872.477	626.945	661.102	360.195	474.957	483.27	411.24	0.142436	0.4334	0.513805	0.0110701
BHLHE40	https://www.ensembl.org/id/ENSG00000134107	385.928	368.153	510.391	448.091	418.909	465.837	610.85	597.924	951.37	868.301	834.04	911.209	0.667608	0.320624	0.109128	0.000278447
P4HA1	https://www.ensembl.org/id/ENSG00000122884	626.841	594.757	653.177	362.24	369.776	397.956	781.543	765.335	815.39	622.294	691.12	669.691	0.000592676	0.0093079	0.00206226	0.00104784
FDPS	https://www.ensembl.org/id/ENSG00000160752	679.274	753.533	628.113	553.543	511.714	542.477	655.745	656.347	601.711	601.826	572.435	582.492	0.0417043	0.0836585	0.316069	0.0367019
TMA7	https://www.ensembl.org/id/ENSG00000232112	668.832	689.669	667.167	685.748	705.485	665.081	566.589	536.658	572.87	514.736	537.531	515.603	0.50569	0.0635055	0.00183671	0.000713835
PERP	https://www.ensembl.org/id/ENSG00000112378	568.352	544.624	591.055	563.93	605.228	585.432	649.571	618.707	681.409	566.034	600.445	585.139	0.401405	0.0470963	0.0253636	0.952284
CCNI	https://www.ensembl.org/id/ENSG00000118816	548.126	537.065	648.743	479.463	520.027	492.73	652.064	633.317	714.664	602.118	639.357	663.808	0.14091	0.363058	0.117963	0.00487686
ACTN4	https://www.ensembl.org/id/ENSG00000130402	589.541	562.451	539.841	537.925	527.685	556.917	647.622	647.051	645.541	607.487	617.068	643.928	0.254237	0.159252	0.0286208	0.00486057
MT1X	https://www.ensembl.org/id/ENSG00000187193	649.56	653.175	748.671	250.327	249.664	243.627	867.425	856.406	918.75	527.2	584.633	562.595	0.0053369	0.000249513	0.0111449	0.0025408
CYP51A1	https://www.ensembl.org/id/ENSG00000001630	585.673	599.084	618.551	382.598	383.207	410.976	660.684	667.636	729.051	656.385	670.31	683.201	9.82761e-05	0.550746	0.0433276	2.86876e-05
LAPTM4A	https://www.ensembl.org/id/ENSG00000068697	558.458	517.365	618.761	493.741	499.993	511.062	595.065	587.567	670.227	626.245	651.984	649.291	0.16127	0.449402	0.253797	0.000379017
KLK10	https://www.ensembl.org/id/ENSG00000129451	843.691	814.415	677.376	470.56	483.378	466.703	685.075	701.771	581.326	400.214	438.541	413.569	0.0261596	0.0174306	0.132915	0.0234087
PRDX1	https://www.ensembl.org/id/ENSG00000117450	602.144	580.413	563.381	699.878	741.884	724.272	496.143	492.591	498.184	502.737	550.711	521.803	0.00110299	0.167504	0.0149328	0.000485927
SDC4	https://www.ensembl.org/id/ENSG00000124145	436.117	417.77	475.951	588.849	643.661	602.795	605.596	589.515	682.904	610.62	662.38	652.53	0.00210889	0.662127	0.00975512	0.258618
VDAC2	https://www.ensembl.org/id/ENSG00000165637	546.361	502.19	586.741	504.984	548.691	497.29	586.304	572.321	680.553	599.402	625.458	630.08	0.39815	0.893672	0.186883	0.00978342
FBL	https://www.ensembl.org/id/ENSG00000105202	754.872	768.409	694.404	366.9	385.621	353.624	705.111	661.88	640.503	480.866	524.635	540.151	0.00121573	0.00413741	0.079417	0.00517516
HSPD1	https://www.ensembl.org/id/ENSG00000144381	652.324	632.349	575.038	434.563	442.705	457.415	627.439	629.478	638.697	566.989	611.591	582.644	0.0119527	0.0670215	0.658244	0.00239954
SFN	https://www.ensembl.org/id/ENSG00000175793	471.059	442.176	411.077	1017.42	1031.84	989.795	394.631	380.863	403.064	393.359	412.517	409.317	2.70656e-05	0.236879	0.0930279	3.5948e-05
ARPC3	https://www.ensembl.org/id/ENSG00000111229	547.583	544.372	527.853	641.215	616.804	657.049	495.593	499.129	478.253	585.959	598.825	559.346	0.00491371	0.00570636	0.00534632	0.0259616
ANXA4	https://www.ensembl.org/id/ENSG00000196975	541.581	557.009	474.901	548.298	557.171	577.611	533.355	526.498	430.739	637.923	695.679	666.583	0.281765	0.0202204	0.545427	0.0110241
PTGES3	https://www.ensembl.org/id/ENSG00000110958	652.03	640.374	601.624	424.461	431.122	437.791	601.472	598.649	599.979	571.199	602.577	583.534	0.00380153	0.257953	0.175868	0.00102468
S100A4	https://www.ensembl.org/id/ENSG00000196154	849.046	818.752	735.927	662.004	682.473	639.965	536.028	513.514	469.829	268.099	276.114	264.734	0.0410968	0.0055102	0.00385906	0.000463621
ATP1A1	https://www.ensembl.org/id/ENSG00000163399	506.792	457.403	417.236	697.04	720.089	748.581	556.039	554.392	575.839	468.75	488.52	498.582	0.00245579	0.00283029	0.0510807	0.000566671
BST2	https://www.ensembl.org/id/ENSG00000130303	580.188	588.541	576.107	602.313	628.406	607.266	529.284	523.613	501.432	506.644	530.831	505.941	0.0430778	0.773201	0.00863923	0.00101581
YWHAZ	https://www.ensembl.org/id/ENSG00000164924	579.554	534.08	543.979	457.56	465.643	493.964	589.044	582.234	606.256	576.77	622.573	603.015	0.0117629	0.620413	0.0824154	0.00198079
G0S2	https://www.ensembl.org/id/ENSG00000123689	354.71	368.284	513.187	550.089	505.455	513.684	643.862	590.198	751.898	600.975	640.072	610.676	0.152541	0.448265	0.0230198	0.00687822
NDUFS5	https://www.ensembl.org/id/ENSG00000168653	581.946	562.886	486.728	693.307	751.547	690.183	471.62	463.666	454.713	436.278	485.926	439.378	0.0119873	0.621469	0.105651	0.00068455
EIF4G2	https://www.ensembl.org/id/ENSG00000110321	626.163	604.186	482.714	472.107	444.808	500.154	624.613	638.598	538.607	507.449	524.265	521.48	0.146474	0.113966	0.619039	0.0931158
HSPA8	https://www.ensembl.org/id/ENSG00000109971	603.346	568.887	424.949	526.266	535.875	548.11	514.454	532.506	531.857	552.61	570.039	561.292	0.943914	0.0113503	0.921267	0.0409269
SET	https://www.ensembl.org/id/ENSG00000119335	610.867	601.663	558.424	449.192	444.042	460.849	601.651	581.7	560.124	509.319	555.26	535.278	0.00850461	0.0562277	0.674531	0.015965
IER3	https://www.ensembl.org/id/ENSG00000137331	525.629	489.091	483.876	566.629	521.537	542.792	481.59	466.327	510.607	619.838	614.596	613.471	0.0755623	0.00868321	0.509602	0.0286374
TMEM123	https://www.ensembl.org/id/ENSG00000152558	609.422	616.62	559.127	395.285	365.209	417.267	625.686	625.322	527.187	540.441	573.694	554.733	0.00115699	0.383494	0.954253	0.00164964
ANXA3	https://www.ensembl.org/id/ENSG00000138772	552.201	564.4	520.455	657.109	592.624	667.932	504.332	517.062	465.38	423.746	426.477	406.493	0.0375462	0.0258879	0.0711876	0.00778251
TRMT112	https://www.ensembl.org/id/ENSG00000173113	563.563	527.327	555.21	533.032	572.455	543.158	475.807	466.711	510.466	489.688	523.474	519.188	0.960566	0.199052	0.0216598	0.0719674
TSPO	https://www.ensembl.org/id/ENSG00000100300	592.006	576.119	604.76	467.031	489.304	467.717	515.877	501.772	538.049	506.093	511.695	501.376	0.000499271	0.368829	0.00667597	0.0349158
LGALS3BP	https://www.ensembl.org/id/ENSG00000108679	557.148	503.429	454.409	577.679	613.899	589.342	502.122	517.304	496.013	446.734	488.343	497.859	0.082545	0.215088	0.99644	0.00543556
CD9	https://www.ensembl.org/id/ENSG00000010278	571.165	577.637	594.477	403.82	405.682	408.872	570.136	566.548	596.796	505.462	524.654	510.423	0.00104356	0.00802025	0.796924	0.0017071
KDELR1	https://www.ensembl.org/id/ENSG00000105438	494.497	463.122	574.808	453.734	478.243	450.734	496.266	500.96	601.065	550.043	580.325	586.559	0.269369	0.368688	0.669168	0.00185674
TPM4	https://www.ensembl.org/id/ENSG00000167460	555.681	564.825	503.653	533.662	478.587	557.644	504.118	507.906	446.831	526.024	536.754	513.19	0.582439	0.178034	0.115202	0.940377
CTSD	https://www.ensembl.org/id/ENSG00000117984	461.684	443.174	433.704	708.087	758.32	704.133	474.424	471.954	474.531	408.617	437.041	444.321	0.000958412	0.056212	0.0776255	0.000404001
HSPE1	https://www.ensembl.org/id/ENSG00000115541	584.985	648.452	526.323	505.789	494.632	493.353	557.929	533.587	452.05	463.605	482.703	461.435	0.126698	0.291218	0.205479	0.0311424
TMBIM1	https://www.ensembl.org/id/ENSG00000135926	487.472	441.079	508.434	620.261	625.82	633.388	465.227	459.099	532.592	456.295	478.318	482.517	0.015091	0.638494	0.840158	0.000594527
TSPAN1	https://www.ensembl.org/id/ENSG00000117472	614.377	577.179	557.221	584.986	613.221	581.736	475.455	487.923	462.743	409.375	423.186	400.76	0.628437	0.0028788	0.0126805	0.000276754
TUBB	https://www.ensembl.org/id/ENSG00000196230	641.298	589.291	529.172	346.43	359.226	355.125	591.457	592.591	642.164	475.409	515.168	511.988	0.0177073	0.00818241	0.586424	0.00444796
PTTG1IP	https://www.ensembl.org/id/ENSG00000183255	589.151	570.17	539.261	401.262	394.816	408.259	605.964	610.139	580.435	469.613	488.528	479.626	0.00507131	0.00109877	0.143833	0.000548488
MYL6	https://www.ensembl.org/id/ENSG00000092841	584.546	554.379	536.763	497.067	522.494	490.14	517.049	509.52	511.806	454.856	474.844	451.959	0.0369158	0.0124752	0.0781855	0.0286442
MRFAP1	https://www.ensembl.org/id/ENSG00000179010	551.412	556.036	527.11	537.396	553.194	539.869	494.451	480.763	464.934	422.962	463.713	445.659	0.901915	0.0751251	0.00640558	0.00657527
RPL27A	https://www.ensembl.org/id/ENSG00000166441	540.693	504.966	535.473	429.174	473.907	451.137	515.463	504.523	565.281	501.309	517.333	491.185	0.0119387	0.311843	0.953189	0.0360433
PCBP1	https://www.ensembl.org/id/ENSG00000169564	546.851	504.628	488.922	494.401	511.798	485.526	525.649	519.853	492.171	470.393	488.45	494.633	0.45941	0.0981208	0.966614	0.295717
MARCKSL1	https://www.ensembl.org/id/ENSG00000175130	582.033	569.001	550.247	542.87	539.576	526.62	515.855	488.916	460.852	393.648	425.99	415.752	0.0591386	0.0214703	0.0204261	0.00136773
EBP	https://www.ensembl.org/id/ENSG00000147155	592.84	611.019	630.825	285.166	292.357	271.825	586.141	570.98	705.149	470.227	488.214	500.286	9.51029e-05	0.081125	0.85116	0.000103735
CD46	https://www.ensembl.org/id/ENSG00000117335	518.117	587.695	510.083	485.415	398.042	504.343	559.928	589.475	492.711	487.032	429.085	419.108	0.142563	0.0500101	0.828624	0.680041
ATF4	https://www.ensembl.org/id/ENSG00000128272	473.884	521.684	527.723	425.752	316.311	387.417	485.478	496.036	516.963	670.788	566.4	560.633	0.0354687	0.100022	0.69755	0.0100464
RAC1	https://www.ensembl.org/id/ENSG00000136238	537.841	502.39	526.516	419.075	432.629	430.466	512.668	495.724	527.076	492.008	529.095	521.553	0.00567281	0.877141	0.493787	0.00941607
MYH9	https://www.ensembl.org/id/ENSG00000100345	541.097	512.038	429.381	400.744	404.25	448.202	576.161	549.775	499.749	477.77	504.514	516.406	0.135761	0.191755	0.310332	0.0150107
PRDX2	https://www.ensembl.org/id/ENSG00000167815	588.898	572.474	489.339	406.121	422.282	391.774	509.995	546.731	482.625	470.51	484.35	486.488	0.0348989	0.215526	0.372125	0.004444
AREG	https://www.ensembl.org/id/ENSG00000109321	280.114	285.696	350.189	854.867	739.699	820.357	347.471	359.862	425.961	474.577	437.428	450.045	0.000571575	0.0711246	0.0946769	0.00540161
PLXNB2	https://www.ensembl.org/id/ENSG00000196576	385.251	365.714	287.888	613.364	539.647	645.198	458.735	458.339	416.948	548.919	532.27	569.92	0.00424795	0.00462714	0.062155	0.253164
HNRNPK	https://www.ensembl.org/id/ENSG00000165119	549.24	564.396	458.857	421.721	396.653	444.133	537.577	542.507	460.127	473.192	481.637	451.56	0.0720768	0.231009	0.812658	0.0515636
HMGN1	https://www.ensembl.org/id/ENSG00000205581	580.179	599.305	543.615	389.243	382.629	398.082	520.384	519.25	507.814	435.98	455.685	431.293	0.00501234	0.00282065	0.0623844	0.00776864
AKR7A3	https://www.ensembl.org/id/ENSG00000162482	454.099	439.432	461.154	482.575	491.381	483.422	427.2	418.253	473.779	524.694	554.439	546.343	0.0200119	0.0133799	0.573147	0.0169687
LGALS1	https://www.ensembl.org/id/ENSG00000100097	698.909	594.053	676.657	105.015	131.492	110.663	731.865	695.55	815.09	377.485	395.135	375.575	0.00215198	0.00778512	0.129589	2.1215e-05
LDLR	https://www.ensembl.org/id/ENSG00000130164	365.855	349.729	360.304	313.057	288.721	332.034	509.168	516.838	665.002	637.1	654.812	687.405	0.049448	0.191923	0.0549241	6.697e-05
CD63	https://www.ensembl.org/id/ENSG00000135404	432.437	438.618	477.24	534.042	578.327	506.375	439.1	415.365	454.612	449.389	484.539	468.78	0.0291756	0.111602	0.511137	0.0563038
RPL14	https://www.ensembl.org/id/ENSG00000188846	484.19	464.741	509.306	399.562	422.895	400.807	521.86	509.604	544.637	457.476	472.39	470.029	0.011213	0.0165015	0.0789746	0.00511095
RPL32	https://www.ensembl.org/id/ENSG00000144713	521.974	476.336	494.197	392.802	446.846	398.069	499.282	488.207	558.626	456.051	464.688	447.695	0.0196076	0.107112	0.530868	0.117702
SERPINB1	https://www.ensembl.org/id/ENSG00000021355	575.206	541.259	493.701	340.197	334.872	358.168	536.624	552.906	520.682	447.483	465.453	448.824	0.00988255	0.00325626	0.999563	0.00034014
PTMS	https://www.ensembl.org/id/ENSG00000159335	642.792	645.785	579.465	211.986	215.94	195.967	654.615	618.502	619.355	391.493	422.064	414.594	0.00144693	0.000182987	0.762439	0.000141856
FAU	https://www.ensembl.org/id/ENSG00000149806	481.899	447.415	464.929	494.352	531.495	485.465	449.83	439.607	472.879	428.456	462.469	445.84	0.0940495	0.573206	0.489427	0.0328993
HSPB1	https://www.ensembl.org/id/ENSG00000106211	417.569	371.892	393.542	537.724	589.05	521.146	404.85	395.167	431.793	508.849	505.509	526.639	0.00521833	0.00288072	0.398188	0.217278
PSMB1	https://www.ensembl.org/id/ENSG00000008018	500.277	463.279	454.595	455.476	475.287	457.889	459.396	466.416	484.14	437.262	469.369	447.252	0.570522	0.198899	0.873767	0.373406
PDIA3	https://www.ensembl.org/id/ENSG00000167004	491.295	470.858	447.575	459.971	485.829	474.26	442.595	446.616	427.453	450.78	491.74	458.696	0.828487	0.13998	0.117816	0.693959
COX7C	https://www.ensembl.org/id/ENSG00000127184	452.528	432.269	438.863	419.539	458.916	415.486	484.263	458.546	501.369	463.257	507.033	473.769	0.562596	0.998372	0.065293	0.0591943
ELOB	https://www.ensembl.org/id/ENSG00000103363	416.139	405.25	424.416	610.354	663.023	567.906	372.015	355.634	406.013	404.772	419.092	433.837	0.0156879	0.0893323	0.114752	0.0133966
EIF4A1	https://www.ensembl.org/id/ENSG00000161960	500.503	461.826	395.84	405.161	418.407	420.753	483.195	489.532	472.67	461.239	482.969	472.268	0.339641	0.296606	0.442425	0.00244129
IMPDH2	https://www.ensembl.org/id/ENSG00000178035	451.683	444.031	466.99	304.521	320.564	306.65	507.385	511.434	571.798	511.984	526.682	540.572	0.000118654	0.877807	0.0561594	0.000101257
RPS15A	https://www.ensembl.org/id/ENSG00000134419	494.706	473.765	501.659	365.107	372.585	377.564	493.59	499.207	515.468	482.962	443.443	442.228	0.00159446	0.0545488	0.301904	0.0184976
CSDE1	https://www.ensembl.org/id/ENSG00000009307	427.602	412.146	412.382	405.851	391.005	430.425	494.314	496.398	509.707	476.911	498.342	502.816	0.561008	0.478553	0.00030332	0.00564403
RPL31	https://www.ensembl.org/id/ENSG00000071082	486.358	457.517	475.788	417.041	433.807	411.157	476.842	469.935	517.409	423.192	460.462	427.53	0.00926666	0.0572617	0.44462	0.309131
ATP6V1F	https://www.ensembl.org/id/ENSG00000128524	419.963	409.643	432.982	570.369	599.869	559.37	400.914	365.517	408.903	414.305	445.115	426.122	0.00122618	0.0936434	0.147961	0.000886787
CAPN2	https://www.ensembl.org/id/ENSG00000162909	344.608	403.223	312.222	571.378	452.087	560.036	435.258	444.429	380.847	555.505	495.22	480.999	0.024118	0.041421	0.120251	0.721074
SRSF9	https://www.ensembl.org/id/ENSG00000111786	489.267	493.809	475.127	374.316	365.329	359.404	518.138	513.992	495.076	436.054	461.339	441.146	0.000111852	0.00397898	0.067209	0.00237767
PDLIM1	https://www.ensembl.org/id/ENSG00000107438	467.807	438.584	475.138	540.187	587.543	550.824	441.179	431.236	460.112	325.337	356.555	347.49	0.00652303	0.00134011	0.312901	0.00053795
NCL	https://www.ensembl.org/id/ENSG00000115053	571.941	565.699	470.759	335.639	321.637	343.32	546.055	529.946	475.524	400.713	434.473	410.669	0.0218368	0.0254873	0.656821	0.00419598
KLK7	https://www.ensembl.org/id/ENSG00000169035	615.721	610.22	511.602	413.406	423.469	423.726	461.87	472.112	396.607	346.476	369.325	349.864	0.0411983	0.0546384	0.0357249	0.00442773
KRT7	https://www.ensembl.org/id/ENSG00000135480	477.087	463.713	350.063	457.546	469.649	464.855	430.515	444.284	361.72	484.284	506.985	471.007	0.490972	0.0825245	0.726774	0.14537
ATP5PD	https://www.ensembl.org/id/ENSG00000167863	452.129	435.761	442.952	430.564	461.718	416.576	439.039	428.829	459.394	450.511	484.29	465.039	0.647045	0.143154	0.913827	0.147158
CLDN7	https://www.ensembl.org/id/ENSG00000181885	432.508	420.315	491.674	360.335	355.174	348.438	448.157	445.965	504.773	499.176	503.025	512.066	0.0482612	0.179714	0.56956	9.04434e-06
FXYD3	https://www.ensembl.org/id/ENSG00000089356	397.958	394.113	389.7	639.914	670.884	640.381	350.482	347.008	361.991	361.332	369.921	355.301	0.000975486	0.219778	0.00397819	0.000277452
TOMM7	https://www.ensembl.org/id/ENSG00000196683	464.583	442.157	504.306	350.183	373.082	352.64	479.273	462.448	519.673	427.301	459.578	439.542	0.0152196	0.0998783	0.53695	0.00271845
SSR2	https://www.ensembl.org/id/ENSG00000163479	439.768	406.917	441.879	474.704	487.9	487.119	389.241	380.908	421.677	431.159	457.659	444.292	0.0294215	0.0418372	0.128241	0.0193699
CHCHD10	https://www.ensembl.org/id/ENSG00000250479	425.445	385.901	373.597	481.592	501.086	444.427	404.025	411.939	400.203	452.125	477.457	477.146	0.0242243	0.0087743	0.577276	0.739773
SEC61G	https://www.ensembl.org/id/ENSG00000132432	441.261	470.024	486.914	450.404	470.604	431.377	402.726	406.75	422.559	416.18	418.242	398.726	0.433049	0.967878	0.036631	0.0519327
VEGFA	https://www.ensembl.org/id/ENSG00000112715	347.227	437.903	431.192	167.837	128.503	161.564	556.89	580.218	620.954	644.431	540.452	593.543	0.0060823	0.858892	0.00993134	0.00161157
OCIAD2	https://www.ensembl.org/id/ENSG00000145247	382.428	378.256	383.092	524.655	519.611	513.998	396.43	378.075	379.522	452.057	462.234	432.938	4.28347e-05	0.00514493	0.62497	0.00831155
CFL1	https://www.ensembl.org/id/ENSG00000172757	493.336	470.39	420.431	458.433	517.445	441.607	407.661	412.234	406.906	375.951	408.428	388.051	0.742158	0.192862	0.13425	0.0549583
SF3B6	https://www.ensembl.org/id/ENSG00000115128	430.322	417.77	420.397	429.297	457.462	448.118	443.181	404.571	426.145	419.526	467.604	427.985	0.0993109	0.503104	0.890274	0.722826
P4HB	https://www.ensembl.org/id/ENSG00000185624	438.009	398.18	403.694	441.518	456.143	437.72	418.004	413.192	441.289	422.651	446.184	453.133	0.10911	0.262873	0.518117	0.704265
LAMB3	https://www.ensembl.org/id/ENSG00000196878	366.557	313.331	411.464	377.359	372.087	383.729	488.086	468.081	632.551	429.317	447.011	470.638	0.672582	0.257236	0.064974	0.0206307
TSPAN8	https://www.ensembl.org/id/ENSG00000127324	527.283	508.514	537.32	292.5	287.732	311.922	492.078	474.196	489.466	404.276	432.045	398.008	4.02515e-05	0.00793575	0.0235415	0.00140623
OST4	https://www.ensembl.org/id/ENSG00000228474	413.466	410.52	438.818	484.956	536.803	484.58	374.394	359.163	428.406	392.939	420.492	393.702	0.0253178	0.56187	0.246932	0.0144202
DDOST	https://www.ensembl.org/id/ENSG00000244038	427.545	411.412	377.581	456.926	454.3	468.633	407.08	406.682	390.9	414.313	443.792	439.508	0.055859	0.0569062	0.819583	0.0780817
HMGN2	https://www.ensembl.org/id/ENSG00000198830	536.578	527.241	478.531	300.779	302.131	295.596	473.568	476.255	481.644	396.452	420.654	407.395	0.00644043	0.00561594	0.174357	0.00233119
MANF	https://www.ensembl.org/id/ENSG00000145050	444.603	433.684	427.082	470.933	485.262	449.669	426.287	417.504	380.645	366.725	382.865	393.327	0.0643008	0.18409	0.184648	0.00323125
TECR	https://www.ensembl.org/id/ENSG00000099797	440.28	409.316	427.484	353.302	382.561	342.02	446.388	440.471	498.289	398.797	433.122	446.305	0.0138411	0.203645	0.179285	0.0239764
VDAC1	https://www.ensembl.org/id/ENSG00000213585	439.611	412.707	418.007	348.389	373.301	357.435	447.57	442.038	435.005	424.694	459.464	454.669	0.0045961	0.713091	0.145951	0.00431831
RAB25	https://www.ensembl.org/id/ENSG00000132698	423.717	407.761	411.081	355.493	383.821	379.088	415.389	414.929	446.463	434.511	448.918	440.214	0.0237817	0.270798	0.39875	0.00679293
TFF3	https://www.ensembl.org/id/ENSG00000160180	716.709	684.234	673.019	221.751	247.409	242.85	478.634	484.087	466.409	230.98	261.192	237.777	4.16991e-05	0.000136999	0.0012447	0.647383
EIF3C	https://www.ensembl.org/id/ENSG00000184110	427.469	393.248	316.176	424.214	423.417	454.072	422.34	422.138	413.215	391.124	418.182	420.015	0.231956	0.421597	0.345555	0.15454
PFDN2	https://www.ensembl.org/id/ENSG00000143256	393.897	390.935	425.186	416.188	415.362	391.826	374.313	348.452	408.908	434.078	471.561	452.971	0.760554	0.029202	0.286796	0.0323685
TMEM141	https://www.ensembl.org/id/ENSG00000244187	503.964	481.096	432.008	412.274	438.786	419.092	384.459	386.78	340.53	363.314	393.628	367.18	0.135255	0.830421	0.0211609	0.018268
UBL5	https://www.ensembl.org/id/ENSG00000198258	420.803	410.297	403.737	470.811	505.286	442.539	375.71	366.817	399.928	349.274	382.56	394.749	0.0685953	0.770106	0.0702743	0.0149568
SRP9	https://www.ensembl.org/id/ENSG00000143742	470.693	478.988	430.492	347.058	336.003	358.233	436.029	439.617	397.539	403.198	422.073	392.03	0.00847652	0.320526	0.152122	0.00728167
ZFP36L2	https://www.ensembl.org/id/ENSG00000152518	375.173	379.441	397.584	337.662	318.559	348.209	463.689	462.478	550.732	429.712	409.903	433.02	0.0126201	0.138188	0.0589696	0.00157296
ITGA6	https://www.ensembl.org/id/ENSG00000091409	404.384	387.923	380.433	306.635	289.445	341.235	474.241	457.374	462.804	440.064	464.713	463.922	0.0211261	0.4271	0.0016445	0.00341822
CCT7	https://www.ensembl.org/id/ENSG00000135624	448.417	431.189	340.795	428.632	438.874	448.313	399.341	421.645	364.724	360.925	384.818	400.58	0.441969	0.554723	0.777051	0.0231024
TRNP1	https://www.ensembl.org/id/ENSG00000253368	461.985	461.344	370.177	511.503	463.276	480.318	378.367	378.252	301.264	323.877	367.56	338.204	0.213031	0.765007	0.122225	0.00181589
SEC61B	https://www.ensembl.org/id/ENSG00000106803	378.927	352.493	379.911	520.783	520.013	493.719	343.18	329.402	331.666	383.81	398.067	389.74	0.000367139	0.000719883	0.0400122	0.0015283
RHOA	https://www.ensembl.org/id/ENSG00000067560	430.823	413.657	430.074	389.635	410.294	395.825	365.509	366.97	387.711	393.328	413.227	404.611	0.0343671	0.0321026	0.0057057	0.574241
IGFBP4	https://www.ensembl.org/id/ENSG00000141753	496.257	468.09	486.685	300.717	316.533	299.127	441.354	430.754	483.979	333.854	364.498	359.385	0.000144711	0.0110585	0.182205	0.0200515
ACSS2	https://www.ensembl.org/id/ENSG00000131069	394.407	452.283	387.217	230.812	208.437	225.053	493.899	512.517	500.702	475.256	432.479	462.048	0.00686669	0.0518928	0.0400044	0.000452666
JUNB	https://www.ensembl.org/id/ENSG00000171223	348.169	292.721	316.263	278.328	251.729	259.939	427.432	403.925	513.999	590.947	527.083	561.322	0.0549735	0.0591186	0.0426234	0.00115553
ARHGDIA	https://www.ensembl.org/id/ENSG00000141522	418.738	390.764	400.978	419.087	437.36	409.232	375.434	374.804	422.411	355.011	383.757	383.606	0.188067	0.424864	0.528806	0.0201142
MORF4L2	https://www.ensembl.org/id/ENSG00000123562	379.266	386.534	411.376	319.91	290.938	324.745	407.5	395.121	461.065	454.89	447.471	444.33	0.00505503	0.303998	0.29264	0.00337912
PRDX3	https://www.ensembl.org/id/ENSG00000165672	455.497	451.032	412.549	336.839	337.155	357.643	400.308	398.52	379.464	389.909	411.474	391.796	0.00852973	0.632275	0.0559506	0.00523465
RRBP1	https://www.ensembl.org/id/ENSG00000125844	345.761	333.699	334.659	410.919	387.457	430.265	385.668	366.008	386.181	436.93	446.825	452.735	0.020852	0.00195509	0.0105524	0.086777
NIBAN2	https://www.ensembl.org/id/ENSG00000136830	385.841	380.926	347.713	431.8	432.389	423.218	394.663	391.462	379.023	364.261	386.264	382.728	0.0342051	0.2781	0.293153	0.00837835
FASN	https://www.ensembl.org/id/ENSG00000169710	369.173	357.125	268.936	320.389	308.816	343.1	428.639	422.869	409.522	473.294	472.856	522.507	0.835906	0.0405983	0.102799	0.00226965
SEMA3B	https://www.ensembl.org/id/ENSG00000012171	208.684	240.209	291.491	894.635	731.404	819.052	208.51	210.17	225.798	305.522	259.89	264.912	0.00178543	0.0370153	0.315132	0.00441448
SUMO1	https://www.ensembl.org/id/ENSG00000116030	397.336	425.194	416.762	392.688	395.968	393.725	386.609	372.174	363.671	363.337	378.963	364.95	0.146361	0.578527	0.0230661	0.0330563
PRSS8	https://www.ensembl.org/id/ENSG00000052344	339.18	320.943	396.878	414.496	432.835	407.976	336.25	336.713	430.31	392.283	413.694	428.19	0.0901234	0.296077	0.712724	0.614478
ARF4	https://www.ensembl.org/id/ENSG00000168374	327.656	310.283	393.083	363.796	379.097	378.153	343.229	332.057	419.92	451.33	461.22	472.121	0.35577	0.0669957	0.598047	0.000425195
SPNS2	https://www.ensembl.org/id/ENSG00000183018	350.104	339.144	342.7	604.082	512.936	598.889	260.383	269.863	263.804	360.666	344.098	343.023	0.0155094	0.00109695	5.76248e-05	0.0145301
ARL6IP1	https://www.ensembl.org/id/ENSG00000170540	455.316	416.183	450.094	208.202	217.218	218.613	469.079	453.708	545.67	359.302	403.495	375.046	0.00169812	0.0433343	0.221278	0.00408577
GADD45A	https://www.ensembl.org/id/ENSG00000116717	199.845	178.748	182.626	1087.2	1034.97	1048.41	124.687	120.978	123.169	162.017	159.52	146.519	4.53394e-05	0.0166734	0.0086445	9.64813e-05
RPL28	https://www.ensembl.org/id/ENSG00000108107	369.782	339.039	403.594	324.736	355.306	308.726	412.74	402.79	456.467	379.712	405.019	405.189	0.155593	0.23676	0.100397	0.0202954
EDF1	https://www.ensembl.org/id/ENSG00000107223	410.726	394.08	399.073	432.239	444.546	416.881	337.571	336.611	338.207	334.347	349.184	343.749	0.0432407	0.370518	0.00557952	0.00204632
JUND	https://www.ensembl.org/id/ENSG00000130522	349.786	326.236	427.989	370.554	361.125	349.561	391.316	381.045	503.324	342.555	369.13	345.02	0.829783	0.199149	0.317813	0.480895
LY6D	https://www.ensembl.org/id/ENSG00000167656	207.919	192.037	192.564	1121.99	1217.42	1166.05	68.0319	67.8956	49.003	75.0172	74.6315	73.6053	0.000554189	0.180128	9.89618e-05	0.000632971
NDUFA1	https://www.ensembl.org/id/ENSG00000125356	368.858	373.174	349.803	378.747	403.602	376.99	343.975	332.181	345.134	382.268	431.397	367.763	0.117088	0.103232	0.0610603	0.751818
DNM2	https://www.ensembl.org/id/ENSG00000079805	316.165	351.72	309.577	330.275	285.472	332.681	377.134	382.567	355.862	479.614	442.384	464.847	0.657044	0.00339043	0.0507664	0.00225514
PHLDA1	https://www.ensembl.org/id/ENSG00000139289	347.443	348.796	340.098	390.166	350.394	413.69	337.192	329.192	310.442	423.29	411.985	416.368	0.164632	0.00290113	0.117661	0.218203
SQLE	https://www.ensembl.org/id/ENSG00000104549	325.159	347.353	377.476	232.72	212.53	242.838	400.976	400.58	500.498	458.576	452.72	466.553	0.00496134	0.527296	0.111359	0.00027862
SMS	https://www.ensembl.org/id/ENSG00000102172	440.9	429.827	446.583	249.51	248.119	249.74	428.039	426.532	439.412	339.546	372.318	344.214	0.000596566	0.00859028	0.292254	0.00961374
ITGA3	https://www.ensembl.org/id/ENSG00000005884	266.356	244.893	200.71	657.785	615.633	694.493	269.747	271.186	240.165	315.087	308.031	329.537	0.000177264	0.0132669	0.367784	0.0026481
GPX4	https://www.ensembl.org/id/ENSG00000167468	357.405	332.704	374.791	414.721	411.891	386.29	314.474	305.005	348.264	383.609	394.526	384.983	0.0354157	0.0315363	0.145556	0.199988
ZNHIT1	https://www.ensembl.org/id/ENSG00000106400	396.348	354.544	373.627	371.746	380.998	363.044	349.753	337.009	359.062	369.139	375.194	363.735	0.840411	0.0633825	0.149631	0.700709
ECH1	https://www.ensembl.org/id/ENSG00000104823	412.346	393.575	394.088	331.969	351.926	321.015	352.964	333.058	365.687	368.164	381.72	384.611	0.00593781	0.0814581	0.0167401	0.0229892
EIF4H	https://www.ensembl.org/id/ENSG00000106682	373.66	377.816	340.247	384.789	376.17	388.493	363.498	377.021	366.878	333.118	357.812	342.385	0.242487	0.0546807	0.711108	0.0177431
ERH	https://www.ensembl.org/id/ENSG00000100632	445.965	441.137	385.716	346.348	367.283	339.773	357.647	349.179	342.002	335.128	345.716	309.214	0.046899	0.204903	0.0543346	0.201599
CAPG	https://www.ensembl.org/id/ENSG00000042493	393.931	364.437	389.834	357.221	381.42	353.745	323.049	328.753	362.596	353.825	383.385	366.259	0.216494	0.127936	0.0486758	0.777372
PSMB4	https://www.ensembl.org/id/ENSG00000159377	381.273	372.475	348.001	377.903	404.029	367.145	353.024	361.942	347.913	337.541	357.732	342.439	0.346993	0.324649	0.324872	0.056393
DSTN	https://www.ensembl.org/id/ENSG00000125868	355.586	348.726	351.333	373.891	392.448	393.294	341.565	343.693	356.203	356.316	375.199	361.748	0.0234126	0.0781263	0.418822	0.0599831
GDI2	https://www.ensembl.org/id/ENSG00000057608	366.146	357.216	349.762	301.316	298.681	320.383	381.563	373.684	396.696	387.616	409.202	406.49	0.00523272	0.148266	0.0389186	0.000610654
SOD1	https://www.ensembl.org/id/ENSG00000142168	446.366	435.308	374.744	318.135	345.027	310.781	369.482	373.379	348.503	319.672	359.742	334.911	0.0346029	0.151419	0.120139	0.438621
SLC25A1	https://www.ensembl.org/id/ENSG00000100075	407.351	406.337	394.403	292.457	296.569	277.999	390.092	404.757	436.667	320.848	337.908	346.444	0.000146599	0.0158423	0.633683	0.0097542
CCT8	https://www.ensembl.org/id/ENSG00000156261	399.136	381.227	354.837	296.951	311.863	315.456	379.484	384.636	384.713	359.707	380.336	361.932	0.0189126	0.131568	0.758691	0.00255973
EFHD2	https://www.ensembl.org/id/ENSG00000142634	398.233	383.4	373.989	253.77	240.941	246.203	383.202	374.507	380.839	427.581	426.147	417.766	0.000392579	0.000440281	0.513266	4.74595e-06
ANXA1	https://www.ensembl.org/id/ENSG00000135046	408.412	394.549	336.672	296.915	275.981	308.5	453.486	456.285	400.497	326.329	339.003	307.62	0.0430817	0.012152	0.119161	0.0816094
RAB1B	https://www.ensembl.org/id/ENSG00000174903	371.078	354.292	355.603	375.39	388.029	381.675	335.657	333.199	356.319	312.841	350.913	343.011	0.0367625	0.681877	0.116657	0.0472794
RPS20	https://www.ensembl.org/id/ENSG00000008988	369.384	365.717	388.398	307.835	326.792	303.181	378.257	363.702	404.343	339.823	351.716	341.185	0.00357097	0.0747059	0.617716	0.0300196
CHMP4B	https://www.ensembl.org/id/ENSG00000101421	395.053	380.172	383.669	312.617	309.508	297.215	378.058	375.918	353.892	331.687	357.845	344.27	0.000255749	0.0843176	0.146929	0.0186152
ATP5PO	https://www.ensembl.org/id/ENSG00000241837	374.445	366.641	321.77	317.413	335.697	338.207	355.118	386.33	343.64	369.666	354.193	353.666	0.281907	0.867994	0.740503	0.028741
CYC1	https://www.ensembl.org/id/ENSG00000179091	371.664	346.151	327.609	329.776	342.3	322.802	341.001	334.925	355.032	373.907	382.309	384.103	0.321194	0.0119973	0.75602	0.00442056
H3-3B	https://www.ensembl.org/id/ENSG00000132475	366.616	359.971	364.759	309.094	314.546	313.414	357.847	348.065	368.243	361.806	385.213	361.066	4.70784e-05	0.319657	0.433889	0.0155954
PRKCSH	https://www.ensembl.org/id/ENSG00000130175	374.93	354.202	358.329	288.632	291.543	286.623	389.694	380.095	406.054	339.486	362.424	367.472	0.00539624	0.0372375	0.0422487	0.0139725
ATP5F1C	https://www.ensembl.org/id/ENSG00000165629	377.101	361.48	335.463	322.783	315.035	325.327	368.177	359.776	339.697	359.948	371.68	356.297	0.0850047	0.532133	0.893237	0.00292531
KLK11	https://www.ensembl.org/id/ENSG00000167757	355.555	386.89	371.444	337.48	311.701	330.44	365.688	373.607	393.405	323.565	320.234	312.243	0.0205471	0.0102677	0.635616	0.424179
NOP10	https://www.ensembl.org/id/ENSG00000182117	369.089	357.86	361.233	358.329	405.697	370.108	327.623	310.514	331.433	324.491	340.62	322.219	0.395422	0.531982	0.0120944	0.059411
ATP6V0C	https://www.ensembl.org/id/ENSG00000185883	269.302	265.115	306.476	583.703	618.935	549.547	249.479	253.306	301.949	251.67	259.649	261.501	0.000511768	0.595087	0.605068	0.0031596
HSPA1B	https://www.ensembl.org/id/ENSG00000204388	337.792	300.462	311.593	393.157	387.361	391.654	307.662	294.035	333.083	368.401	368.101	374.855	0.0195151	0.0319048	0.768164	0.00237908
PCSK9	https://www.ensembl.org/id/ENSG00000169174	321.167	328.098	291.889	193.791	168.746	203.111	440.234	450.943	474.829	426.024	401.196	437.868	0.00119101	0.0867653	0.000741161	9.91998e-05
LMNA	https://www.ensembl.org/id/ENSG00000160789	332.541	316.376	293.667	333.486	332.39	335.183	370.076	370.192	387.068	348.547	350.527	356.493	0.225513	0.0361815	0.017155	0.0104031
SNRPD2	https://www.ensembl.org/id/ENSG00000125743	397.49	398.744	380.751	273.959	290.549	273.869	351.066	340.859	382.909	341.827	352.129	337.187	0.000150135	0.371674	0.0980825	0.00102757
GNB1	https://www.ensembl.org/id/ENSG00000078369	341.83	332.575	318.74	335.33	321.305	332.947	344.615	351.055	356.771	340.526	368.389	369.676	0.890115	0.463431	0.079152	0.0713292
SDC1	https://www.ensembl.org/id/ENSG00000115884	291.756	272.735	248.889	622.835	656.837	653.915	217.171	216.059	186.595	239.822	250.979	255.485	2.5861e-05	0.0350912	0.0169043	0.000126617
PARK7	https://www.ensembl.org/id/ENSG00000116288	382.343	366.435	329.493	350.119	373.5	346.89	330.228	316.059	315.476	313.102	339.724	326.773	0.893218	0.554423	0.121065	0.0565755
SELENOW	https://www.ensembl.org/id/ENSG00000178980	404.357	414.432	396.8	303.976	301.551	292.623	342.525	354.106	340.383	317.618	314.72	307.026	0.000163417	0.00464808	0.00099618	0.042989
YBX3	https://www.ensembl.org/id/ENSG00000060138	247.144	234.492	241.338	580.143	610.103	601.661	268.616	264.866	274.461	238.188	254.554	245.787	0.000112426	0.0208977	0.00439143	4.67764e-05
SERPINA1	https://www.ensembl.org/id/ENSG00000197249	302.277	323.577	281.19	313.087	335.997	305.089	400.755	410.784	396.509	318.333	329.416	343.754	0.367788	0.002686	0.00857723	0.355003
MORF4L1	https://www.ensembl.org/id/ENSG00000185787	337.795	337.159	375.685	300.605	292.458	315.435	341.083	333.048	380.073	338.67	351.55	351.561	0.0453334	0.806748	0.953948	0.00814155
BRK1	https://www.ensembl.org/id/ENSG00000254999	361.714	361.633	345.403	345.751	363.625	332.547	343.173	321.855	337.982	306.306	321.941	307.265	0.452518	0.0543204	0.061222	0.0384543
TOMM20	https://www.ensembl.org/id/ENSG00000173726	335.799	333.229	352.507	277.163	277.318	284.821	382.733	367.065	376.871	344.68	365.761	350.773	0.00413461	0.0533134	0.0116535	0.00286555
XRCC6	https://www.ensembl.org/id/ENSG00000196419	406.21	389.383	319.625	285.153	296.729	302.069	372.849	386.96	361.737	300.382	312.116	313.515	0.0959188	0.00362587	0.945001	0.0994636
ID1	https://www.ensembl.org/id/ENSG00000125968	352.907	340.638	308.802	345.892	323.06	327.348	311.6	311.377	283.452	376.397	374.208	377.649	0.900783	0.014769	0.126046	0.022581
PHGR1	https://www.ensembl.org/id/ENSG00000233041	555.973	482.589	496.115	227.003	243.824	233.373	301.963	291.386	320.362	278.739	287.201	275.459	0.00488338	0.088561	0.00598098	0.00239396
GANAB	https://www.ensembl.org/id/ENSG00000089597	360.088	341.244	299.44	254.094	262.728	276.224	366.068	369.217	367.376	346.97	361.901	376.07	0.0479278	0.555495	0.198267	0.00105255
APEX1	https://www.ensembl.org/id/ENSG00000100823	384.568	375.361	345.293	248.976	260.625	250.902	391.875	386.411	376.241	316.65	326.601	311.099	0.00650662	0.000491772	0.299552	0.000479379
RRAS	https://www.ensembl.org/id/ENSG00000126458	336.516	317.776	370.356	271.3	282.123	267.668	349.463	330.945	401.312	335.926	351.596	350.228	0.0393697	0.56191	0.509648	0.000448581
CLDN4	https://www.ensembl.org/id/ENSG00000189143	243.604	234.606	263.025	363.47	366.078	358.894	284.493	280.821	383.782	400.667	387.635	394.877	0.00343199	0.145132	0.170189	0.00454814
ERO1A	https://www.ensembl.org/id/ENSG00000197930	344.577	330.816	336.285	223.861	208.006	253.712	417.91	411.406	365.941	340.618	369.741	351.407	0.00993803	0.0943653	0.057285	0.00269759
TMED10	https://www.ensembl.org/id/ENSG00000170348	338.095	326.177	317.251	329.269	343.203	356.002	322.138	326.288	309.347	313.207	337.405	333.682	0.189616	0.392701	0.3746	0.243667
OSTC	https://www.ensembl.org/id/ENSG00000198856	301.407	309.577	366.248	333.301	327.198	330.848	289.225	284.298	334.775	361.972	366.949	342.371	0.839275	0.0590987	0.428606	0.0639659
ATP5MF	https://www.ensembl.org/id/ENSG00000241468	387.448	355.544	296.412	363.225	351.416	355.484	312.402	314.323	273.366	305.004	307.1	298.29	0.738944	0.822729	0.219035	0.000374347
CDH17	https://www.ensembl.org/id/ENSG00000079112	338.081	320.124	285.647	232.116	195.722	252.322	391.21	378.615	369.504	379.721	372.657	377.755	0.017893	0.682078	0.0368332	0.011001
COX7A2	https://www.ensembl.org/id/ENSG00000112695	313.824	306.038	298.556	375.286	400.362	366.619	275.191	270.209	302.673	327.475	330.154	319.234	0.0088253	0.0403695	0.131821	0.0232976
B2M	https://www.ensembl.org/id/ENSG00000166710	275.393	265.432	294.979	335.262	313.814	334.353	289.74	292.347	282.855	422.911	396.475	376.432	0.0127636	0.0118123	0.381839	0.01846
PRDX6	https://www.ensembl.org/id/ENSG00000117592	347.531	340.309	341.138	259.811	272.503	265.331	328.127	336.71	333.997	336.83	364.262	348.605	0.000197311	0.157305	0.042651	0.00309599
DUSP6	https://www.ensembl.org/id/ENSG00000139318	430.743	422.219	305.52	314.473	272.473	319.255	365.386	364.776	266.37	268.691	285.998	257.394	0.162499	0.197279	0.360882	0.158551
UQCRC2	https://www.ensembl.org/id/ENSG00000140740	295.553	292.857	263.469	317.927	302.49	324.364	320.93	321.009	306.808	371.252	372.334	365.553	0.0748073	0.00272841	0.0700627	0.0084877
H1-0	https://www.ensembl.org/id/ENSG00000189060	348.176	349.186	329.305	309.409	294.833	302.741	341.188	341.478	290.234	314.622	327.316	304.925	0.00993856	0.671447	0.408745	0.172359
APLP2	https://www.ensembl.org/id/ENSG00000084234	305.956	291.65	262.968	393.921	379.581	416.997	299.773	303.137	293.801	288.483	302.16	306.132	0.00296017	0.997378	0.4426	0.00444845
HIGD2A	https://www.ensembl.org/id/ENSG00000146066	322.754	287.118	328.177	274.796	277.495	269.568	352.87	346.741	383.232	325.5	347.239	326.458	0.09063	0.117549	0.0488308	0.00865204
SPINT1	https://www.ensembl.org/id/ENSG00000166145	268.912	255.341	288.962	352.203	365.401	342.75	291.589	296.735	336.312	328.21	347.973	352.417	0.00354526	0.117526	0.105147	0.347146
TMED2	https://www.ensembl.org/id/ENSG00000086598	321.616	303.973	326.663	301.106	301.574	314.031	305.982	303.058	319.724	331.987	352.219	343.185	0.230078	0.0139383	0.417245	0.00888813
ELOVL1	https://www.ensembl.org/id/ENSG00000066322	320.488	304.52	315.596	310.986	318.723	328.799	297.484	291.866	326.215	331.279	335.277	340.914	0.441846	0.0939216	0.529219	0.066786
ACTR2	https://www.ensembl.org/id/ENSG00000138071	320.513	330.596	279.116	302.163	303.861	331.405	322.117	321.144	278.803	333.995	352.533	345.137	0.903678	0.111278	0.904413	0.0593814
YWHAQ	https://www.ensembl.org/id/ENSG00000134308	404.93	382.501	308.1	274.814	283.83	284.976	356.557	361.452	314.396	273.098	289.035	284.046	0.1013	0.0429598	0.567784	0.889195
JSRP1	https://www.ensembl.org/id/ENSG00000167476	276.089	271.315	357.261	339.497	332.421	328.79	266.138	255.049	369.76	333.903	341.082	340.958	0.369656	0.372172	0.925841	0.271579
H3-3A	https://www.ensembl.org/id/ENSG00000163041	355.423	353.414	343.636	286.774	292.064	275.529	354.343	348.957	340.774	276.708	298.73	284.327	0.000612588	0.00269552	0.629709	0.835685
SRP14	https://www.ensembl.org/id/ENSG00000140319	329.74	329.405	313.365	341.288	342.444	339.972	301.544	291.809	289.834	305.79	320.812	301.449	0.0848708	0.109569	0.0139411	0.0306595
LAD1	https://www.ensembl.org/id/ENSG00000159166	318.28	305.866	238.949	329.459	323.384	338.354	308.67	310.087	282.211	330.586	351.999	357.927	0.222618	0.0196462	0.669018	0.177146
TACSTD2	https://www.ensembl.org/id/ENSG00000184292	307.036	317.297	236.25	367.856	375.992	372.974	364.935	390.638	279.508	253.577	268.618	258.63	0.0773884	0.125322	0.244627	0.000170147
ALDH3A1	https://www.ensembl.org/id/ENSG00000108602	267.462	255.826	226.215	741.354	793.881	754.474	118.857	118.734	130.848	127.653	125.722	127.228	2.25076e-05	0.419495	0.00520109	0.000605205
COPE	https://www.ensembl.org/id/ENSG00000105669	294.561	278.923	292.923	332.323	342.87	328.147	282.623	279.065	299.813	341.417	347.376	348.303	0.002452	0.00679237	0.850527	0.107117
TAF15	https://www.ensembl.org/id/ENSG00000270647	369.666	400.861	350.146	276.579	263.242	261.388	358.613	332.848	321.607	268.228	286.929	276.495	0.0122718	0.0168457	0.128818	0.23372
HNRNPAB	https://www.ensembl.org/id/ENSG00000197451	410.435	394.568	339.211	256.231	267.868	265.26	348.595	344.627	322.237	258.731	285.834	272.566	0.0290235	0.00434077	0.175445	0.365326
STK39	https://www.ensembl.org/id/ENSG00000198648	296.676	300.912	285.777	286.154	255.296	291.543	319.168	312.386	282.005	364.694	400.308	371.234	0.273215	0.00941217	0.480735	0.00302258
ERRFI1	https://www.ensembl.org/id/ENSG00000116285	310.696	316.684	328.248	175.22	156.363	185.578	415.622	422.804	359.674	367.991	362.984	347.828	0.000420428	0.176747	0.0482519	0.000119548
TMED9	https://www.ensembl.org/id/ENSG00000184840	268.406	266.635	300.825	362.957	363.801	335.185	273.996	269.401	300.1	324.861	347.252	334.325	0.00712495	0.0126225	0.870834	0.189471
RAB1A	https://www.ensembl.org/id/ENSG00000138069	269.112	279.475	322.254	350.532	330.053	358.252	293.266	283.481	327.191	308.781	307.349	317.46	0.055102	0.536561	0.62778	0.039728
AP1S1	https://www.ensembl.org/id/ENSG00000106367	315.108	324.447	329.642	407.915	397.427	387.064	264.903	256.117	257.348	266.404	260.772	265.338	0.000910258	0.232495	0.000554094	0.00101666
WDR1	https://www.ensembl.org/id/ENSG00000071127	308.954	295.938	218.417	419.817	402.658	438.033	276.04	284.456	241.681	272.134	275.982	284.421	0.0248725	0.524611	0.836449	0.00227007
PPA1	https://www.ensembl.org/id/ENSG00000180817	354.029	327.447	312.38	279.237	271.259	290.964	322.85	311.08	311.868	304.403	319.805	302.471	0.0356998	0.399704	0.318065	0.0231612
DRAP1	https://www.ensembl.org/id/ENSG00000175550	316.896	307.944	317.648	310.428	304.085	301.379	298.639	289.201	306.936	312.626	325.504	308.811	0.0988435	0.0729982	0.0694548	0.166639
AGPAT2	https://www.ensembl.org/id/ENSG00000169692	341.668	321.697	397.308	153.19	147.355	141.887	329.443	308.525	418.182	363.912	368.406	396.097	0.010615	0.553749	0.972338	0.00079885
TNFRSF12A	https://www.ensembl.org/id/ENSG00000006327	341.521	333.574	298.408	356.127	328.475	316.416	294.725	291.094	279.631	285.426	284.493	275.713	0.632221	0.304267	0.100395	0.0403406
VAMP8	https://www.ensembl.org/id/ENSG00000118640	271.666	272.244	274.895	416.113	446.416	420.158	260.702	242.895	254.568	253.194	288.674	282.042	0.00345562	0.17128	0.0561531	0.000496326
CCL20	https://www.ensembl.org/id/ENSG00000115009	178.961	173.215	124.355	351.041	343.277	363.09	225.003	220.342	134.819	522.324	551.597	494.532	0.00424725	0.00183971	0.379919	0.0048412
ECHS1	https://www.ensembl.org/id/ENSG00000127884	366.776	349.684	319.312	325.09	345.154	318.776	274.199	283.561	265.873	264.311	287.52	273.025	0.397974	0.96416	0.0253068	0.00679423
TOMM6	https://www.ensembl.org/id/ENSG00000214736	344.442	331.006	316.363	267.513	289.546	271.689	301.322	298.809	299.485	304.715	316.832	329.264	0.00735205	0.1362	0.0619161	0.0142654
CD151	https://www.ensembl.org/id/ENSG00000177697	315.789	305.443	279.005	297.155	276.743	281.999	320.841	316.814	313.409	320.266	319.295	320.552	0.320323	0.294119	0.259695	0.0292503
CKS2	https://www.ensembl.org/id/ENSG00000123975	402.607	393.395	441.43	103.261	111.231	110.282	360.398	359.348	450.26	315.642	318.593	298.912	0.00182606	0.114652	0.552156	0.000184938
MDH2	https://www.ensembl.org/id/ENSG00000146701	304.48	280.983	275.153	315.599	327.85	314.246	283.669	287.081	292.513	311.764	335.725	335.673	0.0501775	0.028244	0.932143	0.416932
RAN	https://www.ensembl.org/id/ENSG00000132341	398.815	393.628	327.74	232.642	242.561	230.931	342.131	346.9	327.559	266.121	280.161	271.341	0.0240534	0.00121132	0.267364	0.00258666
JUP	https://www.ensembl.org/id/ENSG00000173801	267.692	243.955	256.341	308.022	301.99	311.065	298.455	304.736	346.769	327.132	329.162	348.859	0.00969692	0.355596	0.0402859	0.0421058
RNASEK	https://www.ensembl.org/id/ENSG00000219200	259.01	245.022	267.994	350.755	404.142	345.043	269.038	269.795	298.767	302.517	316.77	315.188	0.0190509	0.0627213	0.148285	0.0920963
HNRNPL	https://www.ensembl.org/id/ENSG00000104824	387.751	363.421	338.398	235.339	209.927	233.245	351.167	338.374	383.833	275.837	258.438	262.109	0.00288202	0.0119824	0.797165	0.0209966
GNB2	https://www.ensembl.org/id/ENSG00000172354	312	290.471	300.321	298.296	322.748	299.822	301.654	301.083	326.207	284.516	297.862	298.72	0.583296	0.187134	0.450808	0.237376
PFDN5	https://www.ensembl.org/id/ENSG00000123349	312.763	303.625	318.608	301.322	316.53	307.284	290.727	275.881	309.847	308.839	301.769	283.027	0.62472	0.671631	0.175268	0.317667
MAL2	https://www.ensembl.org/id/ENSG00000147676	310.027	310.1	311.839	205.567	197.106	216.461	349.218	350.83	349.943	338.036	350.662	338.473	0.00262621	0.206117	1.47344e-06	7.47249e-05
PRSS3	https://www.ensembl.org/id/ENSG00000010438	283.646	261.043	354.274	232.026	241.193	214.656	307.054	288.851	406.202	323.99	349.934	358.12	0.12037	0.813875	0.499076	0.00121763
NBL1	https://www.ensembl.org/id/ENSG00000158747	325.95	309.479	328.199	225.552	235.673	212.934	324.408	314.484	356.381	312.891	333.785	341.247	0.00042493	0.88102	0.507491	0.000833024
IPO7	https://www.ensembl.org/id/ENSG00000205339	275.352	272.187	252.509	298.008	287.299	327.388	315.344	310.224	299.495	319.518	331.147	329.136	0.0678997	0.0395599	0.0118226	0.19624
LAMTOR5	https://www.ensembl.org/id/ENSG00000134248	269.554	272.293	317.398	309.767	304.25	295.075	285.633	272.89	307.471	323.345	323.758	329.04	0.397869	0.0636847	0.910021	0.0217009
TALDO1	https://www.ensembl.org/id/ENSG00000177156	324.509	307.58	288.188	325.239	336.663	311.357	273.444	268.583	264.951	291.312	309.05	303.878	0.247457	0.0132271	0.0624332	0.069351
HNRNPC	https://www.ensembl.org/id/ENSG00000092199	322.755	307.804	327.975	238.278	250.878	241.402	320.21	308.299	341.139	293.685	322.985	308.195	0.001049	0.309059	0.763239	0.00774816
FSCN1	https://www.ensembl.org/id/ENSG00000075618	283.598	269.447	309.474	295.677	304.895	298.03	287.186	281.464	341.361	295.776	299.523	315.465	0.413923	0.990958	0.526033	0.587386
CCT4	https://www.ensembl.org/id/ENSG00000115484	320.237	290.056	264.215	297.481	317.866	319.167	293.492	299.725	295.1	279.111	302.403	297.568	0.346725	0.711211	0.803507	0.137874
COX4I1	https://www.ensembl.org/id/ENSG00000131143	305.743	295.107	299.233	318.381	334.558	302.063	276.127	262.155	281.257	293.015	311.407	294.855	0.182057	0.0313273	0.0243478	0.181854
FOS	https://www.ensembl.org/id/ENSG00000170345	349.074	254.841	220.586	296.53	231.777	281.324	308.804	283.152	248.948	401.404	345.427	349.389	0.915775	0.0272968	0.90558	0.0231794
PDIA4	https://www.ensembl.org/id/ENSG00000155660	323.053	300.466	266.207	328.704	340.078	339.353	272.467	281.451	252.814	273.148	288.864	288.856	0.133597	0.226689	0.233502	0.00190709
TNFRSF21	https://www.ensembl.org/id/ENSG00000146072	254.132	240.921	234.429	373.352	383.224	386.715	256.287	260.166	257.038	291.497	311.776	304.955	9.51987e-05	0.014367	0.121752	0.000794881
CCNG1	https://www.ensembl.org/id/ENSG00000113328	263.476	263.467	265.211	459.84	473.596	494.852	220.246	218.188	225.66	217.759	227.352	223.493	0.00223593	0.696214	0.00158794	0.00082798
ARPC1B	https://www.ensembl.org/id/ENSG00000130429	311.296	307.174	300.69	309.58	303.602	293.224	267.776	277.411	271.088	295.163	307.314	304.544	0.502902	0.00355431	0.00124887	0.974611
COL6A1	https://www.ensembl.org/id/ENSG00000142156	260.84	248.887	250.631	352.888	331.659	359.184	280.628	269.577	310.015	290.777	284.001	305.166	0.00269535	0.661571	0.0993521	0.00776415
CCND1	https://www.ensembl.org/id/ENSG00000110092	344.677	338.883	286.84	390.657	393.719	414.199	292.784	295.307	248.295	163.151	176.073	177.77	0.0392514	0.0139069	0.137402	5.43307e-05
ARF5	https://www.ensembl.org/id/ENSG00000004059	343.775	337.288	322.698	264.134	260.104	252.613	305.094	296.075	306.054	279.383	281.582	268.25	0.00156273	0.0088691	0.019682	0.0324613
UQCRC1	https://www.ensembl.org/id/ENSG00000010256	312.082	294.137	273.404	285.52	291.688	276.378	290.041	284.535	292.847	295.807	308.351	308.154	0.529563	0.0478282	0.75354	0.0325501
EIF3D	https://www.ensembl.org/id/ENSG00000100353	309.203	280.991	275.232	316.547	329.316	333.041	280.662	278.592	289.781	259.92	284.265	272.834	0.0506302	0.268808	0.662077	0.00466348
CALM3	https://www.ensembl.org/id/ENSG00000160014	336.863	315.294	298.516	237.943	243.035	244.936	325.662	327.624	349.807	264.593	283.12	279.283	0.0184065	0.00479358	0.273802	0.0173655
CNBP	https://www.ensembl.org/id/ENSG00000169714	291.905	283.485	310.354	243.936	240.826	256.575	303.371	303.36	319.23	304.543	322.291	311.105	0.0109702	0.61831	0.242367	0.000773975
EFNB1	https://www.ensembl.org/id/ENSG00000090776	223.872	211.731	209.866	499.971	502.013	506.675	212.069	215.029	205.784	226.487	227.876	241.012	2.06737e-05	0.0264292	0.470743	3.4626e-05
RPN1	https://www.ensembl.org/id/ENSG00000163902	299.033	268.768	278.996	239.58	248.641	240.502	297.659	297.383	339.169	306.762	323.437	336.931	0.0370433	0.546412	0.164291	0.00697955
IDI1	https://www.ensembl.org/id/ENSG00000067064	254.869	282.846	288.563	211.813	197.128	218.009	319.189	323.538	348.736	357.654	337.64	328.74	0.00957049	0.436587	0.0171423	0.000395465
SLC50A1	https://www.ensembl.org/id/ENSG00000169241	270.683	274.802	307.851	271.264	260.934	261.902	270.347	270.762	271.202	333.426	339.283	335.37	0.230538	0.000556901	0.364973	0.000298211
GPI	https://www.ensembl.org/id/ENSG00000105220	361.574	336.968	312.836	144.226	162.455	152.206	395.202	380.782	357.855	268.866	300.598	289.93	0.00246392	0.00333533	0.0875494	0.00085738
NIPSNAP1	https://www.ensembl.org/id/ENSG00000184117	335.476	327.97	321.465	249.199	249.062	249.543	284.049	283.034	291.452	283.398	298.228	290.139	0.00258608	0.440114	0.00182053	0.0105276
ITGB4	https://www.ensembl.org/id/ENSG00000132470	268.646	242.513	219.637	243.238	216.129	263.968	341.713	339.138	364.981	309.512	301.927	332.559	0.906148	0.0521169	0.00623239	0.0156484
EIF2S2	https://www.ensembl.org/id/ENSG00000125977	288.866	290.599	332.942	256.667	247.627	253.257	281.597	269.017	293.864	299.09	312.377	313.628	0.0654808	0.0429262	0.256184	0.0014773
PEBP1	https://www.ensembl.org/id/ENSG00000089220	349.245	337.812	303.655	241.881	248.851	240.884	300.973	304.398	266.332	273.277	287.01	279.286	0.0213255	0.476928	0.0971812	0.00302676
SQSTM1	https://www.ensembl.org/id/ENSG00000161011	166.118	149.109	160.743	460.287	453.677	447.521	195.744	189.988	198.009	332.863	333.133	339.219	2.97928e-06	1.8896e-06	0.00867236	6.87393e-05
SND1	https://www.ensembl.org/id/ENSG00000197157	261.255	248.774	239.441	310.352	323.284	325.047	271.649	272.406	284.076	280.843	296.362	304.954	0.00129855	0.108348	0.0324765	0.0472432
CIAO2B	https://www.ensembl.org/id/ENSG00000166595	274.754	270.351	266.894	402.122	413.312	402.554	236.375	228.859	232.414	226.957	234.363	227.064	2.99498e-05	0.399706	0.000268859	8.86342e-06
MLF2	https://www.ensembl.org/id/ENSG00000089693	282.357	275.401	254.812	360.045	362.713	348.396	256.335	251.863	249.507	249.277	260.113	254.182	0.00254979	0.631279	0.151154	9.40262e-05
GPRC5A	https://www.ensembl.org/id/ENSG00000013588	331.927	327.322	319.234	207.484	204.477	234.186	332.204	330.498	321.294	258.416	268.811	254.154	0.00303331	0.000356161	0.733242	0.0257786
ASS1	https://www.ensembl.org/id/ENSG00000130707	276.282	247.469	276.033	293.504	326.867	305.356	267.175	257.377	285.921	277.847	286.296	286.233	0.0372571	0.248733	0.793396	0.114331
CAPZA1	https://www.ensembl.org/id/ENSG00000116489	276.709	270.822	245.513	309.707	305.947	327.586	268.381	269.925	243.302	289.291	294.041	284.857	0.0162074	0.068112	0.782223	0.0493852
H1-10	https://www.ensembl.org/id/ENSG00000184897	315.565	280.939	292.058	291.334	276.724	267.777	303.981	290.84	287.854	250.954	262.017	259.809	0.235828	0.00540768	0.874068	0.0732326
PDIA6	https://www.ensembl.org/id/ENSG00000143870	323.47	311.996	267.869	247.823	263.774	255.68	307.077	311.312	287.969	257.349	273.711	269.986	0.107117	0.0199635	0.960134	0.171668
BAX	https://www.ensembl.org/id/ENSG00000087088	234.656	249.989	229.942	742.035	745.604	696.363	80.9035	79.0744	69.7845	84.3697	80.6452	83.8815	0.000267284	0.197574	0.000119638	0.00056783
ATP5F1D	https://www.ensembl.org/id/ENSG00000099624	298.86	289.957	286.464	269.927	283.822	249.417	291.302	280.237	292.779	267.871	275.783	278.98	0.125409	0.0561855	0.536678	0.59033
ATP5MK	https://www.ensembl.org/id/ENSG00000173915	264.576	274.311	272.407	269.266	269.835	265.784	266.846	272.841	265.817	319.985	311.91	311.401	0.561158	0.00027894	0.631558	0.000918116
CD24	https://www.ensembl.org/id/ENSG00000272398	240.637	243.713	201.064	434.134	435.462	456.762	235.537	246.099	192.639	226.767	232.178	219.258	0.000762266	0.944263	0.870608	0.000127986
HDGF	https://www.ensembl.org/id/ENSG00000143321	309.574	305.223	285.341	215.936	208.965	213.73	311.174	306.035	309.78	295.177	304.146	294.718	0.00460565	0.0506759	0.352718	6.06231e-05
QSOX1	https://www.ensembl.org/id/ENSG00000116260	317.379	294.141	276.424	168.811	170.377	172.032	371.851	376.432	361.952	264.749	290.535	293.392	0.00848797	0.00398274	0.0158647	0.00607123
EGR1	https://www.ensembl.org/id/ENSG00000120738	302.066	241.995	243.896	202.196	154.415	189.823	332.572	316.746	285.641	394.282	349.467	336.678	0.0341561	0.0984916	0.119561	0.00163575
PHPT1	https://www.ensembl.org/id/ENSG00000054148	230.737	252.619	248.057	475.621	474.021	469.923	195.197	199.243	196.838	206.809	203.901	190.367	0.000434	0.588617	0.0173331	9.22533e-05
C9orf16	https://www.ensembl.org/id/ENSG00000171159	237.227	227.56	224.396	376.084	418.534	379.69	193.808	194.549	219.191	272.7	288.403	306.972	0.00430702	0.00284762	0.0642895	0.00494697
SDHC	https://www.ensembl.org/id/ENSG00000143252	290.393	283.074	253.687	294.758	303.068	287.87	269.195	274.719	236.997	269.642	283.844	280.286	0.217395	0.26987	0.396727	0.0475797
CMPK1	https://www.ensembl.org/id/ENSG00000162368	254.569	263.603	266.43	284.156	276.862	304.206	239.093	241.076	236.327	311.626	329.616	317.679	0.0641605	0.00263694	0.0145045	0.0407064
PSME1	https://www.ensembl.org/id/ENSG00000092010	264.48	251.387	236.182	305.263	304.456	302.564	267.466	271.164	265.458	275.409	290.069	284.595	0.021784	0.054879	0.163323	0.0361476
TNFSF9	https://www.ensembl.org/id/ENSG00000125657	191.2	177.633	230.378	710.19	721.456	674.401	102.973	99.7127	109.314	98.4507	99.6151	96.038	2.08991e-05	0.157789	0.0233226	0.000517635
HSD17B12	https://www.ensembl.org/id/ENSG00000149084	284.712	291.293	259.923	183.979	183.794	207.345	343.617	350.374	346.944	283.696	286.253	289.419	0.00246894	2.35048e-05	0.0158982	0.00509949
TUFM	https://www.ensembl.org/id/ENSG00000178952	298.471	289.214	256.606	284.713	302.398	281.796	254.536	263.056	259.155	264.459	279.99	267.74	0.60518	0.113026	0.21501	0.0828413
GHITM	https://www.ensembl.org/id/ENSG00000165678	276.768	267.01	250.554	267.664	279.66	280.938	269.527	266.373	262.961	284.928	300.549	289.246	0.283156	0.020357	0.864031	0.0701124
PLAAT3	https://www.ensembl.org/id/ENSG00000176485	252.778	266.074	250.715	356.9	342.315	351.141	252.296	250.8	233.806	245.184	253.6	238.184	0.000141967	0.997754	0.229952	7.17635e-05
SEC61A1	https://www.ensembl.org/id/ENSG00000058262	240.164	233.926	209.425	362.335	352.871	377.885	236.507	246.838	217.957	268.477	269.648	272.458	0.000451712	0.0473756	0.663343	0.00500265
SNRPB	https://www.ensembl.org/id/ENSG00000125835	320.873	313.356	252.911	256.575	273.75	249.141	324.9	322.567	280.048	225.018	237.69	229.447	0.231723	0.0267826	0.635356	0.0384132
TLE5	https://www.ensembl.org/id/ENSG00000104964	289.018	286.954	269.881	306.653	295.781	295.556	276.38	270.944	253.129	242.437	256.355	239.747	0.0839791	0.0826569	0.179712	0.00168782
TSPAN3	https://www.ensembl.org/id/ENSG00000140391	247.675	249.566	277.194	245.313	235.336	242.141	294.457	290.339	297.42	290.756	311.136	297.803	0.206522	0.437573	0.0580476	0.00339124
PCBD1	https://www.ensembl.org/id/ENSG00000166228	326.553	321.314	302.161	246.848	251.276	245.401	270.438	266.031	273.905	243.687	266.514	256.119	0.0085048	0.145334	0.0174545	0.369207
ACADVL	https://www.ensembl.org/id/ENSG00000072778	255.882	303.193	253.596	341.044	296.428	330.218	223.915	229.88	218.641	305.138	261.65	250.293	0.0719255	0.0970591	0.0963264	0.0823052
GIPC1	https://www.ensembl.org/id/ENSG00000123159	285.518	272.642	262.732	318.448	322.399	307.395	252.491	245.585	245.559	236.304	249.605	246.69	0.00849995	0.483572	0.0473314	0.000303792
CAPN1	https://www.ensembl.org/id/ENSG00000014216	266.208	246.636	212.235	335.597	341.388	347.085	248.283	252.401	245.907	240.96	249.586	258.587	0.0204325	0.887569	0.694891	0.000289915
PCBP2	https://www.ensembl.org/id/ENSG00000197111	272.939	268.885	283.488	197.697	204.244	196.945	307.766	303.256	334.339	280.801	294.357	297.768	0.000552764	0.113954	0.0374781	0.000808992
ARPC2	https://www.ensembl.org/id/ENSG00000163466	280.831	292.429	256.188	327.871	312.821	323.625	245.262	248.11	222.454	239.902	249.072	242.487	0.0369725	0.594681	0.0517027	0.000390563
EIF3G	https://www.ensembl.org/id/ENSG00000130811	256.292	235.142	243.8	303.229	316.991	301.149	256.288	244.871	264.2	260.194	271.771	276.653	0.00168749	0.125857	0.294256	0.00571494
PRR13	https://www.ensembl.org/id/ENSG00000205352	273.11	268.439	239.974	311.06	314.261	308.798	256.288	267.793	224.838	241.289	266.599	246.617	0.0363997	0.908292	0.547472	0.0133267
SLC44A4	https://www.ensembl.org/id/ENSG00000204385	242.707	227.488	233.397	205.197	188.361	206.65	300.89	303.798	308.593	329.801	325.8	344.049	0.0111861	0.0226948	0.000826906	8.08625e-05
SLC39A7	https://www.ensembl.org/id/ENSG00000112473	227.937	234.659	291.262	257.306	228.788	243.139	232.287	232.297	283.321	330.822	326.103	321.174	0.733465	0.0426107	0.943604	0.00534676
PCNP	https://www.ensembl.org/id/ENSG00000081154	224.603	236.356	233.74	405.329	377.234	426.766	221.042	219.576	207.595	221.161	219.973	213.644	0.00474591	0.681964	0.0510253	0.00501637
CDH1	https://www.ensembl.org/id/ENSG00000039068	282.372	261.631	233.314	216.707	220.661	242.052	300.173	299.926	269.484	281.234	298.223	300.908	0.13471	0.780859	0.160884	0.00314758
EIF3A	https://www.ensembl.org/id/ENSG00000107581	257.994	264.887	248.65	254.628	239.826	273.803	276.953	257.836	257.271	283.266	298.749	291.406	0.926841	0.0314267	0.444721	0.0527597
HDLBP	https://www.ensembl.org/id/ENSG00000115677	223.241	210.245	207.314	258.822	242.714	278.417	259.592	258.138	274.107	324.013	319.683	341.99	0.0295501	0.00220335	0.00206528	0.00780493
ADAM9	https://www.ensembl.org/id/ENSG00000168615	247.378	266.877	217.527	237.33	200.412	258.88	291.159	301.971	249.457	312.581	303.132	309.994	0.627771	0.223102	0.161798	0.0432682
CDA	https://www.ensembl.org/id/ENSG00000158825	264.743	244.502	318.143	197.292	207.706	177.141	301.427	286.548	358.689	268.794	285.122	282.065	0.0496452	0.231806	0.269995	0.00316952
RPL37	https://www.ensembl.org/id/ENSG00000145592	266.561	265.257	284.375	219.826	231.845	217.238	292.766	284.845	304.537	270.505	279.616	274.745	0.00405845	0.0611333	0.0595229	0.00156805
GNAI2	https://www.ensembl.org/id/ENSG00000114353	237.224	224.845	230.485	302.632	307.708	303.785	239.492	238.513	258.348	263.941	270.545	289.837	0.000579783	0.0457687	0.138674	0.0563117
AHCY	https://www.ensembl.org/id/ENSG00000101444	287.855	275.997	242.36	290.222	296.254	294.989	247.104	246.767	258.927	232.061	244.904	235.245	0.205197	0.0717455	0.320516	0.00119156
SURF4	https://www.ensembl.org/id/ENSG00000148248	250.446	237.302	247.954	264.6	267.318	268.152	241.859	240.072	271.298	272.832	291.639	296.194	0.0269592	0.0506541	0.634005	0.102689
SREBF2	https://www.ensembl.org/id/ENSG00000198911	244.584	236.871	224.039	260.912	237.831	273.173	290.037	290.784	301.09	254.495	260.625	270.739	0.155569	0.00700454	0.00254107	0.712456
FLNB	https://www.ensembl.org/id/ENSG00000136068	305.862	290.072	265.036	143.294	130.303	165.206	344.925	327.422	326.233	272.254	275.627	293.638	0.000942593	0.00442398	0.0418921	0.000833133
PRELID1	https://www.ensembl.org/id/ENSG00000169230	306.077	288.154	258.886	214.191	229.545	218.572	278.862	271.648	271.737	253.117	269.883	270.796	0.033297	0.235707	0.533956	0.00462398
HMGB2	https://www.ensembl.org/id/ENSG00000164104	329.993	358.805	357.867	66.0334	63.0995	64.7023	334.22	337.608	389.681	273.365	294.189	260.458	0.00101842	0.0301412	0.822878	0.0020193
DSG2	https://www.ensembl.org/id/ENSG00000046604	248.957	234.932	225.248	190.025	165.96	211.089	329.866	331.76	311.564	280.989	296.569	298.303	0.0481004	0.019469	0.000747497	0.00765617
SERPINB5	https://www.ensembl.org/id/ENSG00000206075	211.799	195.376	170.425	462.844	457.708	491.059	213.108	205.465	193.212	166.298	180.624	176.974	7.28311e-05	0.0180264	0.458451	0.000265871
GLO1	https://www.ensembl.org/id/ENSG00000124767	307.017	301.333	254.542	227.85	233.44	241.287	273.366	268.129	252.664	245.705	264.068	252.757	0.0776664	0.269308	0.301403	0.0439754
SUMO2	https://www.ensembl.org/id/ENSG00000188612	278.098	278.469	287.261	208.172	216.603	207.578	286.58	280.652	296.228	250.608	264.282	260.203	7.27613e-05	0.00866803	0.304563	0.00106617
ALDOC	https://www.ensembl.org/id/ENSG00000109107	317.808	303.462	274.742	139.803	150.51	149.273	334.212	346.577	308.583	245.656	271.319	267.137	0.00444239	0.00985751	0.140386	0.00154073
VILL	https://www.ensembl.org/id/ENSG00000136059	248.709	246.149	213.955	285.836	261.402	291.757	252.085	256.865	232.961	268.225	273.146	277.45	0.042277	0.0587099	0.462142	0.549523
SLC1A5	https://www.ensembl.org/id/ENSG00000105281	259.924	236.484	264.467	177.213	176.355	174.654	264.574	255.886	301.68	314.008	324.815	354.191	0.011798	0.0380158	0.295988	0.00579797
MYDGF	https://www.ensembl.org/id/ENSG00000074842	247.117	231.34	263.638	294.345	295.023	276.525	237.457	226.536	256.015	247.096	261.766	253.933	0.026988	0.23624	0.593048	0.012563
CCT2	https://www.ensembl.org/id/ENSG00000166226	337.56	325.56	233.673	229.63	230.165	244.996	294.944	289.769	237.773	219.09	230.757	215.192	0.187925	0.0945764	0.554797	0.126443
SEMA4B	https://www.ensembl.org/id/ENSG00000185033	251.246	232.177	212.869	169.484	154.164	175.983	283.816	297.336	279.479	334.618	344.737	349.334	0.0121585	0.0015111	0.0228086	6.38654e-05
TOB1	https://www.ensembl.org/id/ENSG00000141232	219.906	217.78	219.148	401.44	372.316	424.478	199.817	191.063	183.319	223.458	215.022	217.106	0.00684659	0.0145974	0.0269603	0.00577243
SYNGR2	https://www.ensembl.org/id/ENSG00000108639	260.635	256.874	250.171	288.443	293.055	282.848	239.797	245.49	232.96	239.591	244.971	247.393	0.00163375	0.357088	0.0266241	0.000406814
CALM1	https://www.ensembl.org/id/ENSG00000198668	291.41	298.653	256.248	269.392	273.535	277.786	255.968	250.987	229.223	217.624	229.23	222.689	0.583622	0.0985231	0.088719	0.000445674
BNIP3L	https://www.ensembl.org/id/ENSG00000104765	288.92	272.145	266.879	207.18	193.948	218.906	315.926	303.925	276.057	242.311	252.252	234.026	0.00216646	0.0270242	0.188763	0.0184069
SF3B5	https://www.ensembl.org/id/ENSG00000169976	292.456	263.056	250.257	305.588	343.511	291.771	235.878	229.728	213.912	210.165	213.759	218.307	0.089151	0.189475	0.0578982	0.0212694
NDUFB7	https://www.ensembl.org/id/ENSG00000099795	288.332	259.481	265.408	259.873	254.508	231.063	242.956	231.399	241.64	251.958	274.354	263.704	0.144389	0.0417202	0.050493	0.252696
C1QBP	https://www.ensembl.org/id/ENSG00000108561	326.675	317.77	267.38	217.088	225.657	225.395	278.033	268.202	246.645	221.154	233.617	233.919	0.0451356	0.0469702	0.152345	0.256814
CYP2S1	https://www.ensembl.org/id/ENSG00000167600	294.643	267.043	257.42	258.482	271.738	266.827	242.433	242.416	212.001	234.785	253.512	255.957	0.586049	0.273125	0.054442	0.10152
IDH1	https://www.ensembl.org/id/ENSG00000138413	287.896	279.638	222.755	220.268	203.682	227.801	272.012	275.815	225.787	275.605	284.713	279.189	0.141874	0.304251	0.841935	0.00674277
PIM3	https://www.ensembl.org/id/ENSG00000198355	183.798	174.42	267.621	159.829	146.253	141.752	236.65	218.424	426.459	368.233	348.973	369.94	0.179592	0.411235	0.332773	2.30429e-05
KDELR2	https://www.ensembl.org/id/ENSG00000136240	234.22	232.71	276.164	207.346	202.645	211.493	233.484	226.866	270.094	310.479	315.254	320.142	0.100068	0.0290193	0.840076	9.55406e-06
ARPC1A	https://www.ensembl.org/id/ENSG00000241685	249.836	244.081	257.175	217.234	222.109	221.953	256.8	261.047	271.056	265.475	288.969	284.357	0.00764685	0.13332	0.0913484	0.0114182
CANX	https://www.ensembl.org/id/ENSG00000127022	239.992	232.478	227.325	201.808	206.365	221.053	294.546	290.571	281.275	264.683	279.651	282.072	0.0347303	0.124868	0.000510108	0.00119269
ITGB1	https://www.ensembl.org/id/ENSG00000150093	237.929	235.46	233.53	197.858	174.084	204.443	295.108	290.723	293.817	278.182	281.959	280.258	0.0398533	0.00172332	5.98132e-06	0.0100053
CAP1	https://www.ensembl.org/id/ENSG00000131236	250.186	229.576	192.928	301.123	293.168	311.351	235.368	239.097	212.624	238.017	252.927	245.836	0.0339044	0.173529	0.814218	0.0013701
HNRNPF	https://www.ensembl.org/id/ENSG00000169813	294.176	294.446	252.267	197.38	193.586	206.411	280.283	276.56	257.237	244.372	256.248	244.901	0.0222829	0.0650763	0.610024	0.000811209
TNIP1	https://www.ensembl.org/id/ENSG00000145901	191.317	187.63	167.482	261.156	244.004	268.255	267.406	272.911	253.51	291.944	286.815	301.181	0.00185401	0.0189428	0.00120152	0.0205397
UNC93B1	https://www.ensembl.org/id/ENSG00000110057	261.379	245.786	263.565	249.535	248.34	254.409	247.486	256.655	254.007	229.883	236.433	243.738	0.389452	0.0357326	0.550354	0.0540377
CCT6A	https://www.ensembl.org/id/ENSG00000146731	275.828	278.901	222.202	251.606	258.058	261.918	244.169	244.167	233.672	232.953	244.401	239.536	0.932191	0.741351	0.425609	0.0154982
BMP4	https://www.ensembl.org/id/ENSG00000125378	370.898	377.758	361.429	172.671	173.008	184.36	287.322	294.033	263.368	162.104	170.676	165.426	8.68981e-06	0.00411703	0.00358748	0.0923467
AHNAK	https://www.ensembl.org/id/ENSG00000124942	271.499	288.443	233.619	139.45	117.458	161.241	353.572	320.918	274.752	272.619	276.945	271.101	0.00442771	0.201084	0.145527	0.00783066
MRPS34	https://www.ensembl.org/id/ENSG00000074071	286.231	269.518	258.927	231.183	246.591	228.551	248.507	238.941	241.924	232.628	248.014	247.797	0.0248593	0.960637	0.0568372	0.386914
LSR	https://www.ensembl.org/id/ENSG00000105699	253.04	241.415	245.017	200.299	214.257	197.894	271.388	274.965	287.664	248.688	263.455	270.916	0.00373531	0.111847	0.008648	0.00290099
LMAN2	https://www.ensembl.org/id/ENSG00000169223	252.081	243.24	233.037	244.881	255.131	240.063	250.564	249.038	240.956	245.049	258.065	256.248	0.611392	0.287594	0.560974	0.346503
LRRC75A	https://www.ensembl.org/id/ENSG00000181350	262.753	255.867	299.679	205.509	203.274	204.42	271.48	261.729	283.052	239.664	236.431	240.319	0.0371175	0.0288234	0.966778	0.000117629
TMEM256	https://www.ensembl.org/id/ENSG00000205544	272.836	244.81	288.881	239.329	234.934	231.826	244.896	235.808	257.376	238.102	247.455	226.829	0.117754	0.377767	0.212542	0.766389
EIF3L	https://www.ensembl.org/id/ENSG00000100129	262.622	246.928	239.699	208.032	213.13	207.71	277.046	272.755	293.829	231.733	255.978	253.35	0.0215981	0.0282676	0.028141	0.0342097
KHDRBS1	https://www.ensembl.org/id/ENSG00000121774	280.381	270.195	252.855	181.137	181.001	185.253	286.817	284.292	280.602	244.982	258.407	256.357	0.00734772	0.00901007	0.17811	0.00154677
AKR7A2	https://www.ensembl.org/id/ENSG00000053371	270.203	272.725	271.857	229.484	227.233	223.51	246.148	247.825	252.003	230.864	242.099	242.158	0.000328284	0.0942112	0.00197304	0.0721845
BANF1	https://www.ensembl.org/id/ENSG00000175334	288.057	285.336	267.173	215.525	234.712	221.677	231.34	224.572	234.187	238.301	260.796	251.386	0.00312189	0.0737803	0.00802982	0.0396617
ATP5MC2	https://www.ensembl.org/id/ENSG00000135390	254.897	247.661	262.427	229.097	245.707	226.594	242.52	244.331	269.423	233.088	250.414	237.744	0.0508572	0.325573	0.78413	0.451567
COX5A	https://www.ensembl.org/id/ENSG00000178741	252.508	248.638	238.092	247.346	248.475	237.459	230.81	237.656	239.723	240.886	261.013	258.243	0.739272	0.0946069	0.124677	0.298997
PFKL	https://www.ensembl.org/id/ENSG00000141959	259.477	253.815	218.481	223.918	220.684	226.043	285.852	279.542	260.862	227.837	240.391	243.001	0.252009	0.0179776	0.117908	0.0896108
PPP1R15A	https://www.ensembl.org/id/ENSG00000087074	251.018	195.291	219.801	202.045	160.675	190.629	270.398	257.82	231.154	346.903	316.612	293.883	0.142664	0.0297056	0.1995	0.00282029
LEMD1	https://www.ensembl.org/id/ENSG00000186007	154.554	167.278	192.589	437.646	445.298	440.999	166.61	154.348	178.96	194.169	201.211	194.809	0.00120392	0.0411864	0.736752	1.66602e-07
EREG	https://www.ensembl.org/id/ENSG00000124882	190.618	179.686	167.587	207.289	178.016	219.192	235.584	241.544	223.091	373.014	352.298	358.471	0.206556	0.000108975	0.00369626	0.00146724
CTNNA1	https://www.ensembl.org/id/ENSG00000044115	243.002	230.089	200.719	192.063	188.635	207.375	298.682	295.638	283.781	252.914	264.773	264.748	0.135688	0.0064409	0.0218519	0.00131598
TSPAN13	https://www.ensembl.org/id/ENSG00000106537	209.929	209.561	244.497	209.196	205.85	217.54	226.925	220	256.846	301.051	307.747	302.879	0.465849	0.0227852	0.458667	0.000114594
ARF6	https://www.ensembl.org/id/ENSG00000165527	255.607	256.712	238.894	232.559	227.854	238.612	250.63	246.206	237.778	240.27	244.184	241.153	0.0746517	0.515162	0.473521	0.0900685
FUS	https://www.ensembl.org/id/ENSG00000089280	390.118	403.143	265.727	225.731	212.241	214.427	278.534	292.054	203.132	144.868	140.243	133.38	0.0891627	0.0486406	0.153391	0.000174611
UBA52	https://www.ensembl.org/id/ENSG00000221983	249.033	234.993	251.387	223.548	253.704	218.597	241.897	248.014	273.805	223.471	232.581	232.869	0.359921	0.11478	0.455089	0.855881
DAZAP2	https://www.ensembl.org/id/ENSG00000183283	235.555	223.399	219.816	250.149	254.935	259.196	237.321	233.292	239.385	236.255	249.166	244.347	0.0123709	0.216552	0.149074	0.0737422
SF3B2	https://www.ensembl.org/id/ENSG00000087365	232.35	241.554	231.804	239.878	205.201	238.332	245.69	243.278	228.868	276.138	251.493	248.046	0.583785	0.150367	0.552933	0.102854
IFI27	https://www.ensembl.org/id/ENSG00000165949	230.064	209.931	208.107	300.331	324.518	290.941	217.377	213.588	198.759	214.503	236.58	225.794	0.00282151	0.140374	0.536763	0.00451718
DHCR7	https://www.ensembl.org/id/ENSG00000172893	239.2	231.462	230.955	128.236	133.878	128.94	281.157	288.677	366.37	267.903	276.879	296.671	1.93909e-05	0.367351	0.101555	0.0022776
MRPS6	https://www.ensembl.org/id/ENSG00000243927	273.986	284.84	306.751	293.966	287.018	296.153	223.041	217.426	202.638	162.174	149.913	153.791	0.732981	0.00263353	0.00508183	1.34282e-05
MZT2B	https://www.ensembl.org/id/ENSG00000152082	272.93	257.267	273.939	180.217	178.007	168.569	257.222	240.773	288.491	231.709	256.788	243.199	0.000331564	0.330373	0.724965	0.00386016
PHB2	https://www.ensembl.org/id/ENSG00000215021	284.817	263.883	244.717	189.641	191.449	193.355	259.473	263.346	256.202	225.024	236.535	237.251	0.0234555	0.00923425	0.720714	0.00600419
BCL2L1	https://www.ensembl.org/id/ENSG00000171552	265.444	258.124	237.703	236.673	232.39	242.063	242.71	246.252	248.567	198.819	209.429	210.487	0.172732	0.00310999	0.442264	0.00352074
PGD	https://www.ensembl.org/id/ENSG00000142657	274.693	257.92	212.452	231.348	234.95	230.9	240.034	240.012	230.599	221.546	227.392	226.205	0.481387	0.0430338	0.601838	0.0332011
SDHA	https://www.ensembl.org/id/ENSG00000073578	224.25	222.796	203.89	286.385	278.842	277.784	207.535	206.334	207.43	234.327	241.343	235.771	0.00453853	0.0040314	0.270699	0.00029939
ST13	https://www.ensembl.org/id/ENSG00000100380	233.601	231.463	232.228	207.267	212.866	215.838	253.805	254.495	258.32	230.826	248.703	244.836	0.0110846	0.11405	0.000986153	0.0185491
MT1E	https://www.ensembl.org/id/ENSG00000169715	313.862	319.354	264.101	218.06	231.89	204.586	259.241	256.528	244.798	166.222	178.816	163.337	0.0286816	0.000212048	0.11436	0.0104225
TFF2	https://www.ensembl.org/id/ENSG00000160181	341.007	296.486	298.29	143.634	149.089	153.536	246.767	262.723	237.554	240.157	231.695	218.488	0.00623724	0.124381	0.0315091	0.00184792
WBP2	https://www.ensembl.org/id/ENSG00000132471	193.62	183.668	199.702	251.166	262.254	252.814	224.582	214.457	238.06	256.237	266.74	272.958	0.000627892	0.0117123	0.0200825	0.180864
KLF5	https://www.ensembl.org/id/ENSG00000102554	280.358	270.642	228.326	183.747	178.439	191.941	278.052	279.35	237.778	220.856	234.206	226.75	0.0360273	0.0999632	0.814059	0.00151253
BCAP31	https://www.ensembl.org/id/ENSG00000185825	252.756	236.302	238.022	226.449	245.2	219.329	239.759	237.998	247.135	211.511	225.16	227.192	0.274863	0.0337811	0.909604	0.388437
ILF2	https://www.ensembl.org/id/ENSG00000143621	257.076	244.811	219.999	215.769	218.377	219.412	232.865	227.07	236.79	243.958	245.283	244.661	0.170793	0.0459118	0.5261	0.00055745
EIF2S3	https://www.ensembl.org/id/ENSG00000130741	248.08	258.25	244.444	196.412	182.18	207.868	250.552	252.605	235.633	250.595	237.602	234.066	0.00666506	0.494732	0.588121	0.01015
C1orf43	https://www.ensembl.org/id/ENSG00000143612	229.3	217.759	222.454	229.239	234.424	229.459	226.323	221.045	230.07	242.012	257.679	253.696	0.128301	0.0164955	0.569947	0.038297
MKNK2	https://www.ensembl.org/id/ENSG00000099875	179.474	176.792	182.098	342.648	322.015	373.057	207.846	206.878	227.56	188.382	186.025	194.966	0.00734611	0.0538163	0.030624	0.00737929
DPM3	https://www.ensembl.org/id/ENSG00000179085	250.254	268.465	284.296	188.052	187.56	170.714	246.281	214.109	258.101	231.648	228.864	254.387	0.0038433	0.94259	0.166936	0.00650543
PPP1CA	https://www.ensembl.org/id/ENSG00000172531	258.096	252.923	227.683	232.124	242.819	240.033	240.747	231.471	227.859	202.295	212.93	213.508	0.495275	0.0109497	0.30459	0.00428302
ST14	https://www.ensembl.org/id/ENSG00000149418	227.259	220.235	188.559	229.677	212.138	226.24	251.342	263.324	240.567	229.241	240.158	252.84	0.478072	0.310193	0.058635	0.109684
POLR2L	https://www.ensembl.org/id/ENSG00000177700	245.716	236.362	205.514	295.935	318.825	288.513	204.315	206.918	197.886	180.572	204.916	192.954	0.0108911	0.280962	0.158766	0.000959179
SELENOF	https://www.ensembl.org/id/ENSG00000183291	231.251	236.212	238.593	243.499	241.009	247.432	214.013	216.833	201.647	232.106	237.299	232.761	0.0403045	0.0274463	0.0200841	0.0167392
HDAC1	https://www.ensembl.org/id/ENSG00000116478	274.241	280.451	210.631	187.62	178.26	188.154	259.485	269.009	218.199	236.128	233.217	233.855	0.0844975	0.450732	0.831979	0.00243623
ATP5MC3	https://www.ensembl.org/id/ENSG00000154518	258.858	247.757	209.639	223.051	233.767	226.094	238.195	243.02	216.752	215.573	232.895	218.508	0.536154	0.35463	0.7424	0.451899
LTA4H	https://www.ensembl.org/id/ENSG00000111144	233.699	224.048	226.963	179.917	176.902	189.668	268.76	269.158	281.837	227.527	248.303	234.183	0.000964692	0.010676	0.0017389	0.00320973
ACAT2	https://www.ensembl.org/id/ENSG00000120437	292.624	303.918	246.395	158.075	149.433	156.13	250.561	255.254	266.252	220.529	231.175	221.094	0.017102	0.00590196	0.310135	0.0001408
TESC	https://www.ensembl.org/id/ENSG00000088992	263.894	264.149	243.316	242.382	247.929	228.768	222.475	217.439	219.753	199.012	204.924	196.418	0.125834	0.00526398	0.0283256	0.0101353
GLUD1	https://www.ensembl.org/id/ENSG00000148672	234.167	222.138	238.748	143.582	139.03	150.01	261.34	258.149	282.787	268.321	273.744	275.145	0.00032	0.590622	0.0239114	1.83619e-05
MALL	https://www.ensembl.org/id/ENSG00000144063	250.186	239.104	227.046	152.661	158.219	157.946	277.11	277.546	266.924	236.594	250.888	248.934	0.0041318	0.00867675	0.0185791	0.000729308
NDUFA8	https://www.ensembl.org/id/ENSG00000119421	222.296	218.055	195.691	282.208	292.797	288.629	215.822	208.145	185.311	195.63	220.921	217.409	0.00600261	0.534784	0.509865	0.00501404
TCP1	https://www.ensembl.org/id/ENSG00000120438	250.47	243.251	223.148	179.297	186.13	186.005	242.068	245.793	250.081	240.414	249.098	245.899	0.0158129	0.818053	0.484735	6.08183e-05
PDZK1IP1	https://www.ensembl.org/id/ENSG00000162366	198.365	199.298	213.714	252.378	268.223	254.157	207.278	208.533	194.127	232.77	256.536	250.808	0.00151797	0.0105923	0.947012	0.264537
CCT3	https://www.ensembl.org/id/ENSG00000163468	267.856	251.302	201.387	219.478	236.133	243.072	230.783	229.441	216.713	204.801	215.998	214.259	0.757677	0.0735815	0.54541	0.0748726
TRIP10	https://www.ensembl.org/id/ENSG00000125733	208.023	204.391	224.645	315.37	275.578	316.191	198.07	202.062	216.517	189.972	187.345	191.553	0.0105336	0.0984869	0.463045	0.0132701
HNRNPH3	https://www.ensembl.org/id/ENSG00000096746	249.384	275.902	253.014	175.143	152.604	175.686	250.331	255.076	239.3	235.419	235.868	224.941	0.00128087	0.0554303	0.320892	0.00560281
ATP5F1A	https://www.ensembl.org/id/ENSG00000152234	244.557	231.771	203.319	225.147	229.844	222.203	228.471	228.994	220.371	223.459	234.891	229.107	0.953054	0.500328	0.965489	0.444825
SBDS	https://www.ensembl.org/id/ENSG00000126524	217.454	209.121	216.761	276.77	274.791	272.86	208.863	210.928	200.045	204.763	218.018	206.924	0.000470857	0.569089	0.144184	0.00232164
F11R	https://www.ensembl.org/id/ENSG00000158769	188.572	183.974	218.526	262.581	260.86	276.259	197.525	195.808	245.847	219.834	230.919	235.278	0.0122739	0.444547	0.46691	0.00486215
MVD	https://www.ensembl.org/id/ENSG00000167508	218.699	251.942	240.874	156.77	136.398	139.086	229.509	237.823	263.829	292.899	265.739	280.967	0.00244922	0.0536509	0.669248	0.000229299
SARAF	https://www.ensembl.org/id/ENSG00000133872	228.402	248.469	222.955	246.918	217.307	237.56	230.487	240.979	203.65	219.12	214.308	202.42	0.958156	0.366941	0.579871	0.111796
SOX9	https://www.ensembl.org/id/ENSG00000125398	235.523	240.677	249.028	205.859	208.187	229.497	257.122	250.245	248.696	192.988	196.447	197.355	0.0486237	0.00030785	0.105183	0.124261
IL32	https://www.ensembl.org/id/ENSG00000008517	209.248	199.62	173.379	313.83	335.723	308.529	196.586	196.968	167.065	194.223	210.45	202.733	0.00100891	0.254228	0.64734	0.000921182
PSCA	https://www.ensembl.org/id/ENSG00000167653	233.877	228.403	258.458	306.612	276.549	297.988	174.071	162.18	164.187	206.449	199.957	196.56	0.0141898	0.00228965	0.00805279	0.00520952
CD82	https://www.ensembl.org/id/ENSG00000085117	164.014	170.719	153.964	351.852	367.454	363.342	172.278	175.795	156.8	205.001	211.756	211.731	8.1538e-06	0.0111568	0.518294	0.000118676
RNF128	https://www.ensembl.org/id/ENSG00000133135	280.079	283.745	222.466	178.431	176.973	193.125	251.641	264.062	196.26	210.89	231.467	213.112	0.0495662	0.466344	0.437932	0.0142689
ERP29	https://www.ensembl.org/id/ENSG00000089248	247.923	243.889	259.574	181.567	195.125	180.466	228.443	218.129	250.751	221.717	238.607	232.869	0.000626389	0.90691	0.194197	0.00271217
CD99	https://www.ensembl.org/id/ENSG00000002586	242.33	241.108	257.847	186.184	201.918	183.262	247.541	244.155	262.646	198.485	209.869	215.534	0.00205526	0.00479222	0.608082	0.0856692
IL18	https://www.ensembl.org/id/ENSG00000150782	227.617	221.495	211.755	198.303	197.662	211.44	237.625	242.179	244.406	237.027	236.22	224.454	0.0505497	0.14878	0.0298279	0.00784593
RHOC	https://www.ensembl.org/id/ENSG00000155366	177.08	158.692	180.743	368.498	396.439	365.584	160.895	156.939	182.337	178.984	182.04	181.098	0.000150818	0.217108	0.629583	0.00233491
YWHAG	https://www.ensembl.org/id/ENSG00000170027	224.268	218.466	200.79	251.634	255.713	269.702	227.37	221.972	213.844	198.35	203.363	201.68	0.00886279	0.0253259	0.474409	0.00588012
CAPNS1	https://www.ensembl.org/id/ENSG00000126247	266.495	242.357	230.327	222.622	246.324	232.076	217.438	209.753	210.882	193.429	206.02	209.108	0.380968	0.165653	0.0802401	0.0260101
AP3S1	https://www.ensembl.org/id/ENSG00000177879	218.351	212.963	230.294	230.42	222.756	236.675	243.26	231.592	229.596	210.19	213.702	203.48	0.225672	0.0103444	0.100962	0.0167741
ATP5MG	https://www.ensembl.org/id/ENSG00000167283	223.297	216.741	215.121	227.688	252.509	227.726	214.924	213.892	218.113	220.642	226.656	220.695	0.158717	0.0507384	0.400718	0.245244
DDR1	https://www.ensembl.org/id/ENSG00000204580	188.776	176.96	176.516	206.992	198.226	210.989	259.176	263.176	277.869	230.901	239.413	248.505	0.0111195	0.0240971	0.000447192	0.00712808
H2AC19	https://www.ensembl.org/id/ENSG00000272196	256.518	234.767	319.483	262.464	258.232	235.704	189.602	187.687	301.154	145.378	146.073	139.055	0.556723	0.157963	0.392331	0.00364769
PSMD4	https://www.ensembl.org/id/ENSG00000159352	212.005	214.878	192.403	241.399	246.204	243.631	218.167	218.437	211.187	219.59	224.653	232.558	0.0300691	0.108675	0.309814	0.0289576
EID1	https://www.ensembl.org/id/ENSG00000255302	216.805	223.883	178.771	311.501	316.492	322.695	197.052	197.703	159.495	174.591	186.771	181.69	0.012322	0.799431	0.313936	9.84634e-06
PPP4C	https://www.ensembl.org/id/ENSG00000149923	236.072	232.128	222.167	234.534	245.155	224.643	215.292	211.082	191.603	200.623	225.754	228.272	0.558327	0.347912	0.0597382	0.20422
RHOB	https://www.ensembl.org/id/ENSG00000143878	274.443	224.972	217.674	227.645	211.778	226.905	203.148	192.827	241.1	228.272	213.418	200.696	0.446212	0.9221	0.31463	0.455351
MRPL41	https://www.ensembl.org/id/ENSG00000182154	235.921	216.992	218.85	261.471	273.814	247.266	192.507	177.079	186.698	215.084	224.599	210.46	0.021346	0.00707211	0.00846322	0.0139509
RPN2	https://www.ensembl.org/id/ENSG00000118705	234.954	229.518	188.643	244.089	239.264	250.272	209.783	210.122	198.047	212.525	221.842	220.113	0.203628	0.0738646	0.510792	0.00365689
TNFRSF10B	https://www.ensembl.org/id/ENSG00000120889	172.677	178.262	176.961	305.15	252.799	316.513	176.879	175.754	206.279	242.834	223.101	227.581	0.0269145	0.026476	0.410018	0.0807766
HMGCR	https://www.ensembl.org/id/ENSG00000113161	184.258	185.324	187.776	123.699	114.873	131.694	256.508	251.746	295.501	304.386	305.206	312.477	0.00447038	0.0998783	0.0267496	5.30052e-05
AAMP	https://www.ensembl.org/id/ENSG00000127837	244.758	239.603	215.065	234.952	226.703	232.862	219.412	213.429	201.375	199.276	216.828	207.826	0.877143	0.664552	0.126454	0.0267251
MAP2K2	https://www.ensembl.org/id/ENSG00000126934	204.93	205.847	193.681	227.606	221.189	217.003	211.433	209.831	207.414	252.136	250.261	248.091	0.0164745	1.62711e-05	0.167068	0.00595636
CMAS	https://www.ensembl.org/id/ENSG00000111726	224.038	247.331	227.894	179.943	171.569	178.098	236.19	239.77	205.227	244.936	250.148	243.774	0.00937389	0.219002	0.673498	4.31942e-05
SARS1	https://www.ensembl.org/id/ENSG00000031698	167.541	153.369	152.024	308.652	314.434	324.313	189.249	186.435	198.349	206.618	215.506	220.191	2.07711e-05	0.0135181	0.00695913	8.43458e-05
SLC9A3R1	https://www.ensembl.org/id/ENSG00000109062	225.559	216.532	178.452	249.179	250.456	249.43	206.647	210.959	193.149	209.748	220.377	224.349	0.0971473	0.105565	0.848016	0.0179287
DCXR	https://www.ensembl.org/id/ENSG00000169738	204.758	205.39	203.503	241.509	273.63	238.126	192.168	188.941	207.639	214.237	222.778	227.584	0.0540015	0.0276613	0.286396	0.108316
HNRNPA2B1	https://www.ensembl.org/id/ENSG00000122566	279.727	307.433	245.007	176.812	165.872	178.215	235.467	234.304	209.139	199.621	199.597	187.31	0.0246879	0.0511949	0.0876564	0.0181451
COX6B1	https://www.ensembl.org/id/ENSG00000126267	211.199	203.993	208.258	228.261	251.575	222.151	202.241	188.17	216.823	218.783	236.805	227.883	0.0930334	0.0713817	0.584675	0.590918
BZW1	https://www.ensembl.org/id/ENSG00000082153	256.303	247.64	216.741	171.419	169.877	185.875	249.947	247.546	231.519	207.142	221.326	207.604	0.0202863	0.015361	0.848851	0.00639353
GABARAP	https://www.ensembl.org/id/ENSG00000170296	196.323	180.097	211.663	233.035	246.422	224.019	204.161	206.167	236.846	212.443	234.042	226.245	0.0309386	0.535182	0.23261	0.321636
CST3	https://www.ensembl.org/id/ENSG00000101439	193.133	193.579	199.931	369.75	403.275	363.081	147.067	147.284	148.365	141.116	147.699	151.604	0.00367564	0.826539	0.00156653	0.00178101
DBI	https://www.ensembl.org/id/ENSG00000155368	260.193	259.141	211.057	172.641	174.647	170.958	233.053	242.939	227.942	206.142	231.31	201.7	0.048158	0.129126	0.645891	0.0468718
COPG1	https://www.ensembl.org/id/ENSG00000181789	177.209	163.992	176.537	214.704	227.147	223.311	195.589	186.76	216.244	257.576	268.379	280.155	0.00107411	0.00409691	0.0719928	0.00701273
XBP1	https://www.ensembl.org/id/ENSG00000100219	205.923	186.823	241.208	168.451	170.261	177.127	215.647	210.757	253.847	243.617	252.021	260.125	0.128446	0.198231	0.503331	0.000550891
GNG5	https://www.ensembl.org/id/ENSG00000174021	221.418	219.055	227.053	169.048	167.314	166.285	239.908	235.775	249.071	231.405	229.59	228.902	0.000703308	0.0929767	0.0211422	6.15835e-07
NDUFA2	https://www.ensembl.org/id/ENSG00000131495	197.263	199.605	201.507	239.011	248.156	224.81	195.264	198.975	207.849	211.702	238.973	220	0.0274841	0.0877794	0.777924	0.263751
ETHE1	https://www.ensembl.org/id/ENSG00000105755	224.954	217.01	220.546	208.161	212.968	201.526	221.84	214.821	240.159	200.932	210.293	205.867	0.0358078	0.105886	0.598569	0.68798
SERINC1	https://www.ensembl.org/id/ENSG00000111897	185.704	184.723	217.703	169.674	161.657	178.384	239.791	228.835	282.539	233.168	251.341	238.325	0.122354	0.630302	0.0592375	0.000646864
MVP	https://www.ensembl.org/id/ENSG00000013364	192.649	188.332	173.668	261.896	265.821	259.332	191.765	196.959	183.294	211.044	217.684	218.798	0.00274887	0.00968346	0.459369	0.000160833
EIF4EBP1	https://www.ensembl.org/id/ENSG00000187840	246.058	209.048	268.222	170.292	182.37	170.56	198.635	195.597	246.107	214.253	223.409	223.61	0.0544449	0.713341	0.3095	0.00105307
GUK1	https://www.ensembl.org/id/ENSG00000143774	216.989	214.579	236.938	214.265	221.477	215.043	193.92	199.526	227.037	200.972	206.95	200.359	0.498138	0.731964	0.275717	0.0104859
ACLY	https://www.ensembl.org/id/ENSG00000131473	242.759	248.823	176.271	172.801	156.082	178.563	234.414	242.265	189.99	231.453	229.285	241.165	0.1393	0.548434	0.98965	0.00313891
NUCKS1	https://www.ensembl.org/id/ENSG00000069275	242.009	237.844	214.369	161.81	159.584	172.48	238.183	242.092	230.669	205.761	219.461	213.465	0.00719026	0.0103949	0.594722	0.00100802
TMPRSS4	https://www.ensembl.org/id/ENSG00000137648	200.036	203.834	208.967	235.193	208.638	229.72	214.89	222.319	228.277	189.587	185.7	194.832	0.118844	0.00382477	0.0250878	0.0401826
ELF3	https://www.ensembl.org/id/ENSG00000163435	182.246	173.625	184.077	223.315	226.958	224.531	182.926	181.517	225.975	234.805	231.777	242.76	0.00249729	0.106554	0.368201	0.0605092
TRIR	https://www.ensembl.org/id/ENSG00000123144	277.888	270.637	227.831	206.584	189.134	188.722	217.467	219.331	200.284	170.386	176.121	169.291	0.0412911	0.0139149	0.0820531	0.047278
RABAC1	https://www.ensembl.org/id/ENSG00000105404	199.433	176.297	231.033	218.695	231.418	221.403	177.278	173.421	211.356	217.608	232.633	221.105	0.30515	0.0798205	0.498841	0.992866
CLSTN1	https://www.ensembl.org/id/ENSG00000171603	197.76	188.919	202.886	177.815	180.903	182.82	225.161	224.046	241.447	219.037	228.049	241.706	0.0464079	0.946403	0.0104874	0.0141738
TP53I3	https://www.ensembl.org/id/ENSG00000115129	20.323	24.563	15.5489	834.94	755.793	777.303	16.6147	17.8022	12.7132	11.5548	10.1987	9.58022	0.000831717	0.0611512	0.232115	0.000913161
ARL6IP5	https://www.ensembl.org/id/ENSG00000144746	203.275	197.361	207.132	185.725	194.379	183.941	206.341	211.916	212.281	222.36	242.147	233.731	0.0281553	0.0472165	0.100727	0.00555775
VAT1	https://www.ensembl.org/id/ENSG00000108828	230.929	202.561	223.857	180.972	187.598	177.94	206.605	200.312	231.573	210.975	223.853	223.269	0.0383202	0.579068	0.6494	0.00298495
RBCK1	https://www.ensembl.org/id/ENSG00000125826	181.722	195.545	218.891	198.202	181.447	187.658	205.547	207.304	213.881	247.54	223.189	232.195	0.482276	0.056934	0.448543	0.00878628
PSMA6	https://www.ensembl.org/id/ENSG00000100902	197.626	190.663	174.067	249.864	257.864	254.582	187.696	182.248	172.007	206.942	211.876	204.054	0.00621219	0.0142553	0.468403	0.000140261
RAB10	https://www.ensembl.org/id/ENSG00000084733	203.864	196.68	175.632	252.889	251.118	267.693	184.254	189.144	164.606	195.641	206.153	200.978	0.00518069	0.0868882	0.324485	0.00202863
RAD23B	https://www.ensembl.org/id/ENSG00000119318	224.715	218.583	205.975	185.262	183.618	190.501	222.064	213.366	208.323	210.603	217.856	207.042	0.0214681	0.621093	0.801863	0.00438922
TAX1BP3	https://www.ensembl.org/id/ENSG00000213977	227.509	211.243	197.596	281.459	307.427	280.785	182.064	174.522	174.438	145.26	154.361	146.48	0.00321819	0.00185547	0.0462976	0.00182101
CAMK2N1	https://www.ensembl.org/id/ENSG00000162545	192.366	203.771	220.309	178.276	169.46	181.15	223.459	212.972	211.607	224.795	228.721	235.68	0.0524674	0.050668	0.32847	0.000373266
PCNA	https://www.ensembl.org/id/ENSG00000132646	297.065	301.15	194.099	310.561	307.351	314.197	181.426	196.142	132.699	79.5293	84.519	75.9593	0.314644	0.0404443	0.0970742	3.95767e-07
UBALD2	https://www.ensembl.org/id/ENSG00000185262	194.751	187.304	229.307	172.175	165.411	157.857	212.793	206.727	278.366	220.482	228.753	219.68	0.0847018	0.715604	0.34988	0.000597628
ANP32A	https://www.ensembl.org/id/ENSG00000140350	233.579	231.786	197.941	179.166	184.5	179.871	229.44	218.025	204.432	187.596	215.191	202.059	0.0720935	0.219312	0.79705	0.11875
PSMB3	https://www.ensembl.org/id/ENSG00000277791	227.488	213.529	184.036	218.702	230.576	212.821	191.195	186.131	183.86	197.358	208.832	208.788	0.445619	0.023869	0.236192	0.0779971
EIF3K	https://www.ensembl.org/id/ENSG00000178982	204.259	202.803	188.802	218.343	229.288	215.807	181.793	177.876	187.587	210.208	222.047	215.991	0.026093	0.00185441	0.0605191	0.40046
TMEM14C	https://www.ensembl.org/id/ENSG00000111843	185.342	182.413	180.514	263.242	269.756	259.752	186.74	178.43	178.185	183.562	194.231	185.545	0.000187448	0.199387	0.639027	6.99365e-05
AGRN	https://www.ensembl.org/id/ENSG00000188157	199.893	198.746	165.569	199.939	185.363	206.364	235.579	236.756	229.705	188.657	188.349	201.022	0.526123	0.00305037	0.0504878	0.580769
SHMT2	https://www.ensembl.org/id/ENSG00000182199	285.819	264.463	241.775	145.126	150.123	146.814	218.986	217.931	223.228	171.308	182.129	186.112	0.0108785	0.00630821	0.0721675	0.0115316
FOXQ1	https://www.ensembl.org/id/ENSG00000164379	264.644	268.632	180.953	342.449	316.215	331.092	190.832	192.7	107.64	76.1597	87.5416	73.5459	0.0760839	0.0912349	0.136961	6.24887e-05
ARCN1	https://www.ensembl.org/id/ENSG00000095139	165.207	159.274	172.821	201.153	195.234	217.33	184.992	181.477	205.054	247.134	246.338	254.947	0.0122569	0.00836542	0.057659	0.0114116
GADD45B	https://www.ensembl.org/id/ENSG00000099860	253.267	160.904	144.23	177.412	158.867	175.852	212.49	206.117	127.907	312.678	268.331	225.178	0.695739	0.0804253	0.931951	0.0537884
DHCR24	https://www.ensembl.org/id/ENSG00000116133	243.48	238.544	181.054	172.766	162.464	179.107	214.843	220.534	183.299	201.859	211.771	211.412	0.124807	0.874215	0.565299	0.00499774
FKBP8	https://www.ensembl.org/id/ENSG00000105701	221.05	205.954	214.873	185.801	192.008	177.421	203.481	199.046	216.768	190.544	208.496	205.247	0.0090372	0.549971	0.338432	0.0828543
LAMTOR2	https://www.ensembl.org/id/ENSG00000116586	199.711	184.646	186.043	276.098	281.735	277.18	162.031	159.23	153.28	179.152	183.576	176.806	0.00113162	0.0033095	0.00934375	3.68202e-06
PKP3	https://www.ensembl.org/id/ENSG00000184363	212.23	208.957	189.663	156.841	141.915	154.346	231.567	234.51	231.177	216.95	216.525	218.853	0.00540031	0.000591925	0.0520315	0.00405438
PFKP	https://www.ensembl.org/id/ENSG00000067057	211.215	194.998	172.162	155.964	152.298	161.295	234.214	238.091	213.36	216.67	225.962	229.82	0.0784198	0.644744	0.0674668	0.000310474
TMEM45B	https://www.ensembl.org/id/ENSG00000151715	212.509	206.118	222.241	228.089	222.317	243.428	171.586	169.89	173.445	180.594	190.347	185.341	0.0933266	0.0279001	0.00960136	0.00888243
PLP2	https://www.ensembl.org/id/ENSG00000102007	228.005	214.949	228.987	117.029	116.677	111.771	270.747	260.742	284.188	184.554	196.366	191.785	0.000527615	0.00187848	0.00641302	0.000335028
TRIM28	https://www.ensembl.org/id/ENSG00000130726	224.74	218.491	185.09	195.718	193.754	191.256	213.366	224.012	216.107	173.348	182.697	184.552	0.326045	0.00137183	0.570149	0.0474392
NDUFB10	https://www.ensembl.org/id/ENSG00000140990	216.338	203.426	196.464	191.523	212.754	192.865	181.452	188.971	189.148	202.27	214.771	211.07	0.519654	0.0097411	0.0661811	0.275538
GOLM1	https://www.ensembl.org/id/ENSG00000135052	214.877	222.5	200.496	169.682	151.242	171.895	224.907	223.111	213.307	198.503	207.005	202.215	0.00625563	0.0191793	0.364677	0.0179949
PRMT1	https://www.ensembl.org/id/ENSG00000126457	233.314	231.488	193.934	192.815	174.252	194.624	213.418	206.545	188.159	189.01	186.586	194.038	0.111179	0.225836	0.333984	0.730912
AP1M2	https://www.ensembl.org/id/ENSG00000129354	205.603	192.2	178.278	217.794	242.32	222.637	173.206	180.416	181.344	198.401	199.354	205.836	0.0310008	0.00284553	0.218395	0.0612173
COPZ1	https://www.ensembl.org/id/ENSG00000111481	205.648	199.828	215.607	184.441	188.36	188.066	189.253	184.991	205.154	205.908	214.631	211.143	0.0408071	0.0889921	0.149917	0.00393937
HNRNPUL2	https://www.ensembl.org/id/ENSG00000214753	216.143	212.434	200.149	162.587	157.668	167.462	230.802	222.545	213.001	194.992	211.092	202.59	0.00268686	0.0507558	0.150505	0.0036409
NDUFB4	https://www.ensembl.org/id/ENSG00000065518	201.391	196.555	193.526	210.189	219.119	200.702	196.802	194.362	190.984	185.714	196.033	193.902	0.122414	0.585919	0.340966	0.0552076
TSPAN15	https://www.ensembl.org/id/ENSG00000099282	216.171	213.25	190.405	189.19	170.213	173.286	194.512	195.528	184.737	212.373	221.383	216.199	0.0498744	0.00542979	0.198381	0.0113515
LASP1	https://www.ensembl.org/id/ENSG00000002834	197.926	186.941	182.066	187.502	188.781	190.697	202.023	204.264	213.781	196.174	210.818	213.463	0.997587	0.98517	0.0435866	0.0761508
EHF	https://www.ensembl.org/id/ENSG00000135373	171.142	178.054	145.463	306.936	300.876	340.79	159.854	164.127	132.936	154.622	163.993	153.56	0.000853402	0.662464	0.417058	0.00386232
SERINC2	https://www.ensembl.org/id/ENSG00000168528	225.711	208.249	211.881	234.083	242.553	225.444	178.626	178.532	180.617	152.768	166.306	167.522	0.0614973	0.0661697	0.0197381	0.00046887
TIMP1	https://www.ensembl.org/id/ENSG00000102265	221.003	206.897	225.461	123.636	135.876	122.856	246.233	233.148	262.106	197.04	205.779	188.579	0.000320166	0.0116718	0.0512394	0.000495706
RNF5	https://www.ensembl.org/id/ENSG00000204308	220.181	217.476	220.332	161.523	167.89	153.862	209.388	198.899	199.805	189.095	211.36	209.211	0.00336209	0.951083	0.0309391	0.0122072
NGRN	https://www.ensembl.org/id/ENSG00000182768	186.237	172.096	185.763	221.055	218.974	221.354	165.734	162.806	185.305	207.424	211.141	217.828	0.0121165	0.0166596	0.308145	0.104095
LMAN1	https://www.ensembl.org/id/ENSG00000074695	177.302	168.508	188.435	144.413	139.178	159.176	207.392	195.267	218.489	250.031	251.496	255.923	0.0214722	0.0160356	0.031649	0.0016866
LSM7	https://www.ensembl.org/id/ENSG00000130332	207.916	219.62	205.338	198.276	192.078	192.814	180.576	175.587	188.322	199.187	203.746	192.107	0.0466373	0.0287171	0.00739649	0.381761
LY6E	https://www.ensembl.org/id/ENSG00000160932	249.637	235.202	214.04	242.492	258.957	232.209	169.305	170.239	154.917	136.914	149.608	141.898	0.424618	0.0268809	0.010737	0.0016457
PTBP1	https://www.ensembl.org/id/ENSG00000011304	231.856	227.033	183.967	154.789	144.047	156.29	223.761	225.543	200.394	201.931	197.624	206.756	0.0470568	0.209637	0.903028	0.00078667
STT3B	https://www.ensembl.org/id/ENSG00000163527	204.128	199.344	179.463	192.008	182.697	210.257	202.183	199.235	181.503	198.544	203.743	197.777	0.954273	0.473684	0.999639	0.600934
MISP	https://www.ensembl.org/id/ENSG00000099812	204.091	185.166	184.02	187.857	183.053	194.708	196.165	194.866	221.18	197.288	194.302	205.262	0.750682	0.621376	0.298431	0.0914165
CD81	https://www.ensembl.org/id/ENSG00000110651	214.372	207.154	227.268	208.36	216.141	198.277	185.499	192.892	213.543	153.541	166.579	164.222	0.331285	0.03336	0.14636	0.00266351
EWSR1	https://www.ensembl.org/id/ENSG00000182944	228.928	230.967	189.579	189.599	176.06	194.098	223.052	222.465	189.295	165.811	167.167	164.889	0.144183	0.0543853	0.794217	0.0606204
HMG20B	https://www.ensembl.org/id/ENSG00000064961	228.548	231.552	216.582	166.25	154.017	157.549	217.727	208.863	210.339	183.27	183.414	181.558	0.000449699	0.00646514	0.0817843	0.0208217
ATP5PB	https://www.ensembl.org/id/ENSG00000116459	210.644	207.062	177.569	200.869	210.395	211.862	187.949	193.37	176.223	185.028	191.842	185.857	0.474785	0.77591	0.361747	0.0120738
SERP1	https://www.ensembl.org/id/ENSG00000120742	166.68	156.872	189.08	190.082	189.859	197.016	186.569	177.76	205.615	222.559	225.723	229.829	0.146717	0.0410638	0.205178	0.000461808
PHB	https://www.ensembl.org/id/ENSG00000167085	249.574	241.41	190.482	175.234	182.604	181.976	203.853	207.383	172.923	170.754	182.467	176.263	0.122931	0.232773	0.221452	0.455942
COPS6	https://www.ensembl.org/id/ENSG00000168090	200.422	198.961	168.179	193.983	206.367	190.011	199.188	196.645	185.276	191.311	200.24	194.169	0.561851	0.777722	0.720627	0.799432
C4orf3	https://www.ensembl.org/id/ENSG00000164096	242.02	263.912	220.552	129.756	130.755	130.494	261.321	262.427	219.048	148.273	161.835	153.181	0.0122621	0.0169705	0.78907	0.0254655
SRP68	https://www.ensembl.org/id/ENSG00000167881	172.439	166.843	167.143	190.081	189.582	198.533	202.492	195.691	210.132	201.368	206.707	217.548	0.00413444	0.414354	0.00680655	0.0587851
DCBLD2	https://www.ensembl.org/id/ENSG00000057019	208.673	216.147	148.779	253.795	228.487	272.466	188.954	200.459	131.477	154.854	155.48	153.301	0.0862336	0.465481	0.591484	0.0166127
JTB	https://www.ensembl.org/id/ENSG00000143543	192.134	187.889	200.715	181.763	172.78	182.233	179.084	190.678	194.987	217.522	208.066	203.689	0.0415907	0.0273656	0.431487	0.00480269
TXNDC5	https://www.ensembl.org/id/ENSG00000239264	198.44	192.079	180.219	163.71	159.484	172.82	187.694	194.295	205.337	208.56	225.339	222.515	0.0230794	0.0344594	0.497355	0.00160997
PRELID3B	https://www.ensembl.org/id/ENSG00000101166	184.094	184.006	180.756	176.586	173.777	183.952	176.182	181.539	172.762	229.323	231.367	232.025	0.246675	0.000973766	0.12423	0.00191259
TCEA1	https://www.ensembl.org/id/ENSG00000187735	194.762	183.558	172.814	186.04	188.87	199.062	194.256	196.595	183.851	192.243	207.892	203.062	0.375908	0.194112	0.361966	0.186415
SLC20A1	https://www.ensembl.org/id/ENSG00000144136	148.265	151.64	171.043	184.188	160.991	183.718	210.353	203.545	205.512	246.104	212.883	219.105	0.138328	0.191261	0.0144297	0.0202058
PLEK2	https://www.ensembl.org/id/ENSG00000100558	210.52	188.438	215.031	106.02	111.049	104.603	216.378	214.011	250.669	222.655	230.633	224.484	0.00498109	0.935452	0.204411	4.27804e-06
SEPTIN2	https://www.ensembl.org/id/ENSG00000168385	210.686	219.954	165.005	205.849	183.758	209.024	191.744	192.462	151.62	192.256	191.438	179.437	0.961168	0.575902	0.412492	0.278025
SUPT4H1	https://www.ensembl.org/id/ENSG00000213246	159.525	158.962	146.514	309.331	305.027	308.111	146.449	136.768	132.678	155.273	172.188	160.624	0.000304086	0.0217127	0.0499695	0.000631976
DNAJA1	https://www.ensembl.org/id/ENSG00000086061	196.792	193.323	170.322	229.625	236.603	239.606	179.431	178	171.309	162.139	169.38	162.857	0.0188128	0.0284087	0.330912	7.19147e-05
AP2S1	https://www.ensembl.org/id/ENSG00000042753	231.088	215.702	204.488	219.53	235.139	209.3	165.335	162.906	171.122	153.624	163.355	154.188	0.714429	0.0819671	0.0154863	0.00626175
MCL1	https://www.ensembl.org/id/ENSG00000143384	201.407	202.951	180.662	166.174	155.773	176.703	211.19	206.441	196.886	196.142	199.632	191.119	0.0388887	0.148846	0.31733	0.0264597
NACA	https://www.ensembl.org/id/ENSG00000196531	187.691	185.252	193.945	165.462	164.749	169.304	204.715	202.259	208.934	197.716	206.705	195.72	0.00420839	0.265367	0.00881333	0.00426272
RAC2	https://www.ensembl.org/id/ENSG00000128340	152.273	135.729	168.585	229.55	243.509	224.884	163.606	158.295	186.837	193.839	210.2	213.994	0.00405623	0.0322711	0.249897	0.033552
HSPA9	https://www.ensembl.org/id/ENSG00000113013	202.202	194.012	171.364	158.727	142.759	163.291	208.32	209.934	189.081	211.263	219.153	208.331	0.0439831	0.257351	0.315293	0.00368091
SAP18	https://www.ensembl.org/id/ENSG00000150459	192.455	189.875	196.265	198.029	200.809	184.053	188.09	180.073	177.544	179.119	199.812	189.49	0.814721	0.343522	0.0536445	0.575567
STUB1	https://www.ensembl.org/id/ENSG00000103266	189.842	184.455	184.361	251.138	258.614	241.004	161.985	168.929	147.901	159.143	166.512	158.586	0.00295928	0.806559	0.0409558	0.000640108
SERBP1	https://www.ensembl.org/id/ENSG00000142864	221.225	218.908	184.891	162.54	161.451	173.915	213.445	214.745	190.058	170.505	183.652	174.384	0.0566535	0.0463391	0.882503	0.141048
IER5L	https://www.ensembl.org/id/ENSG00000188483	154.148	160.67	143.182	286.282	273.056	271.781	160.428	160.237	182.225	160.263	158.14	158.288	5.92733e-05	0.3539	0.176532	0.00125562
UQCR10	https://www.ensembl.org/id/ENSG00000184076	192.985	180.492	183.006	213.374	236.686	207.486	167.747	164.611	175.57	182.207	183.639	176.088	0.0471085	0.0530684	0.0332349	0.0421505
WDR83OS	https://www.ensembl.org/id/ENSG00000105583	199.914	185.086	189.847	184.132	212.095	178.648	197.065	182.862	195.223	162.169	184.535	190.26	0.999396	0.278998	0.987872	0.402141
SNX3	https://www.ensembl.org/id/ENSG00000112335	194.293	189.392	188.051	159.047	162.731	152.516	201.365	203.466	203.992	196.291	207.728	199.911	0.00164942	0.680385	0.0125107	0.000709952
APRT	https://www.ensembl.org/id/ENSG00000198931	224.512	212.757	184.161	188.292	196.076	184.538	180.4	191.986	184.423	162.902	168.846	176.369	0.27877	0.0357399	0.208291	0.0178713
ERGIC3	https://www.ensembl.org/id/ENSG00000125991	201.421	198.84	199.408	155.735	159.367	156.103	206.859	208.604	224.905	178.212	180.196	179.861	2.10951e-05	0.0262252	0.139719	0.000398823
TTLL12	https://www.ensembl.org/id/ENSG00000100304	206.78	200.814	168.716	199.445	185.817	204.114	191.097	188.607	162.324	173.888	181.193	186.018	0.761489	0.977207	0.49047	0.0801223
RARS1	https://www.ensembl.org/id/ENSG00000113643	163.419	159.555	164.091	164.858	162.895	171.12	191.334	191.558	192.273	228.525	224.813	229.833	0.257048	0.00126647	0.00164988	0.000123044
PRSS22	https://www.ensembl.org/id/ENSG00000005001	144.672	161.638	168.839	277.417	235.723	252.889	142.47	141.798	160.979	201.233	180.077	175.663	0.00480876	0.0228665	0.355572	0.0122944
LSM4	https://www.ensembl.org/id/ENSG00000130520	197.198	190.355	196.794	201.033	202.866	188.712	172.634	167.082	188.064	176.692	179.437	181.879	0.618557	0.645277	0.0819728	0.0432308
PLPP2	https://www.ensembl.org/id/ENSG00000141934	198.779	193.476	196.978	164.551	172.331	164.681	181.978	179.096	199.464	194.147	199.486	195.823	0.00155324	0.266223	0.268981	0.00150693
CMBL	https://www.ensembl.org/id/ENSG00000164237	149.542	146.388	157.596	282.069	283.539	296.539	154.959	149.204	156.238	150.567	154.408	154.307	3.78411e-05	0.89051	0.600087	0.000569105
SEC13	https://www.ensembl.org/id/ENSG00000157020	151.553	145.249	173.848	178.543	178.585	184.145	154.152	150.046	197.811	234.576	237.5	242.778	0.107282	0.0405213	0.591792	6.96194e-05
CYBA	https://www.ensembl.org/id/ENSG00000051523	212.779	204.351	196.205	169.261	184.049	162.201	180.301	170.715	181.808	178.114	191.329	191.163	0.0179229	0.176512	0.0129701	0.135227
CHPF	https://www.ensembl.org/id/ENSG00000123989	165.223	150.004	169.922	244.548	244.058	234.529	159.415	164.33	187.33	158.895	164.231	174.711	0.00120882	0.681695	0.461606	0.000358076
CPNE1	https://www.ensembl.org/id/ENSG00000214078	188.525	183.333	166.804	158.672	158.423	166.721	204.312	204.24	193.562	196.65	197.379	196.139	0.09212	0.380864	0.0635826	0.00521859
BEX3	https://www.ensembl.org/id/ENSG00000166681	189.49	187.957	182.663	231.553	233.407	223.282	151.311	156.25	151.873	155.881	180.788	169.683	0.000701128	0.156897	0.000313346	0.00630644
CYB5B	https://www.ensembl.org/id/ENSG00000103018	192.416	193.72	169.524	253.187	267.637	265.328	148.11	151.963	131.489	139.835	152.916	146.651	0.002748	0.74317	0.0161938	4.82931e-05
NUDC	https://www.ensembl.org/id/ENSG00000090273	222.225	217.662	192.139	163.586	168.357	163.257	186.163	183.4	167.608	176.847	187.262	183.841	0.036203	0.620599	0.0563319	0.0141745
CCDC124	https://www.ensembl.org/id/ENSG00000007080	188.624	187.205	181.646	207.197	208.618	200.395	160.125	162.632	162.601	175.199	185.685	192.121	0.00450255	0.0413274	0.00338421	0.0322174
NHP2	https://www.ensembl.org/id/ENSG00000145912	215.601	206.048	181.212	153.86	163.917	154.876	197.133	189.465	177.144	184.777	193.153	189.848	0.0414146	0.846384	0.345452	0.00184115
ADAP1	https://www.ensembl.org/id/ENSG00000105963	202.469	197.003	185.472	172.632	159.736	169.652	177.478	180.848	162.369	200.195	197.705	200.676	0.0137754	0.0416218	0.0483435	0.0110325
HNRNPA3	https://www.ensembl.org/id/ENSG00000170144	226.359	232.852	173.815	182.433	180.319	189.571	187.782	187.752	154.842	160.653	167.098	160.488	0.285606	0.328228	0.20604	0.00461304
SYPL1	https://www.ensembl.org/id/ENSG00000008282	203.304	197.337	189.845	179.056	182.29	178.859	184.288	185.452	179.76	166.603	179.899	172.719	0.041262	0.103105	0.0550514	0.204216
LAMC2	https://www.ensembl.org/id/ENSG00000058085	153.246	145.691	127.87	162.62	154.501	174.761	208.037	207.824	201.027	213.357	220.74	229.452	0.089499	0.0597138	0.00894798	0.00195215
PTPRF	https://www.ensembl.org/id/ENSG00000142949	177.745	164.619	154.858	147.641	132.618	159.157	216.796	217.682	213.938	199.198	198.969	213.463	0.131984	0.118044	0.0147987	0.00564759
DAP	https://www.ensembl.org/id/ENSG00000112977	146.314	133.383	138.872	261.989	250.669	256.144	139.143	134.094	148.578	190.709	195.588	199.315	2.26885e-05	0.00110943	0.857893	0.000184253
PSMA7	https://www.ensembl.org/id/ENSG00000101182	196.415	188.457	172.526	191.879	200.342	189.668	170.241	174.112	160.543	180.13	186.796	181.886	0.373385	0.0492348	0.114116	0.0558239
CTTN	https://www.ensembl.org/id/ENSG00000085733	184.2	219.159	147.821	230.124	182.467	224.385	180.33	189.495	131.446	180.874	163.224	155.578	0.330077	0.980177	0.576587	0.0738543
SDHB	https://www.ensembl.org/id/ENSG00000117118	178.371	178.259	159.151	186.232	195.797	186.512	169.154	175.037	162.276	194.766	201.862	196.401	0.0925359	0.00528504	0.700519	0.107618
LAMP1	https://www.ensembl.org/id/ENSG00000185896	166.831	158.885	148.393	242.54	246.83	245.031	155.087	157.766	160.804	156.548	168.605	175.53	0.00252956	0.241322	0.980596	0.00357603
DHX15	https://www.ensembl.org/id/ENSG00000109606	212.845	211.41	165.383	152.565	134.1	166.439	208.987	209.536	178.314	182.97	177.167	180.946	0.0803649	0.21097	0.904932	0.0841938
SLC38A2	https://www.ensembl.org/id/ENSG00000134294	155.429	150.269	168.14	151.527	133.838	162.854	189.238	177.378	202.298	232.796	223.24	232.997	0.4485	0.0178496	0.027471	0.00538113
TRIM29	https://www.ensembl.org/id/ENSG00000137699	145.679	140.879	146.568	186.934	195.172	195.495	191.519	195.114	219.453	179.376	184.595	197.122	0.000367637	0.231604	0.0190816	0.423271
IRF2BP2	https://www.ensembl.org/id/ENSG00000168264	187.484	184.948	161.646	136.419	133.773	143.186	208.868	207.606	194.48	197.028	210.305	202.935	0.02897	0.971413	0.0690157	0.000273736
STOML2	https://www.ensembl.org/id/ENSG00000165283	207.184	199.271	162.987	166.905	166.909	167.384	192.68	192.788	164.435	176.914	185.241	184.633	0.236505	0.924097	0.716434	0.0293576
LGMN	https://www.ensembl.org/id/ENSG00000100600	228.584	209.88	196.713	188.566	187.486	190.084	160.911	160.113	162.623	151.56	161.396	156.029	0.12963	0.223152	0.0312259	0.00504341
IFNGR1	https://www.ensembl.org/id/ENSG00000027697	148.8	143.781	135.53	200.59	188.842	218.476	168.284	180.821	145.058	208.643	212.119	200.693	0.00995965	0.0450117	0.159822	0.663732
RAB11B	https://www.ensembl.org/id/ENSG00000185236	184.272	198.636	192.919	168.418	170.675	169.668	175.75	178.062	179.519	172.674	175.533	178.033	0.0306076	0.287828	0.0685524	0.0478256
PSMA2	https://www.ensembl.org/id/ENSG00000106588	203.916	196.679	175.581	180.445	180.41	178.658	185.82	174.282	164.847	162.428	176.888	162.678	0.286783	0.380634	0.184773	0.118125
RDH11	https://www.ensembl.org/id/ENSG00000072042	173.541	177.673	190.596	132.446	111.162	131.222	183.919	186.806	210.696	215.122	209.439	210.435	0.00384447	0.165347	0.267823	0.00418139
WDR45B	https://www.ensembl.org/id/ENSG00000141580	205.332	215.752	214.283	112.601	105.778	115.21	207.737	209.868	216.8	176.747	175.427	174.469	2.35834e-05	0.00394185	0.943629	0.00117961
DHRS3	https://www.ensembl.org/id/ENSG00000162496	163.318	148.383	176.402	181.567	189.443	195.766	158.648	156.288	179.34	181.322	197.282	201.268	0.0639251	0.041833	0.85971	0.588663
HNRNPH1	https://www.ensembl.org/id/ENSG00000169045	200.686	251.028	188.696	165.214	115.549	162.196	191.797	200.464	147.83	184.272	163.937	157.023	0.0594964	0.569942	0.255265	0.333925
KRTCAP2	https://www.ensembl.org/id/ENSG00000163463	163.627	161.5	170.753	187.46	183.941	173.799	155.312	163.752	171.498	195.985	195.39	204.715	0.035535	0.00534697	0.764553	0.032886
FGF19	https://www.ensembl.org/id/ENSG00000162344	152.462	134.695	198.778	141.356	132.93	137.627	116.615	110.22	157.924	272.782	275.253	295.239	0.325096	0.0032478	0.240634	0.000965649
PTP4A2	https://www.ensembl.org/id/ENSG00000184007	185.112	183.083	175.115	139.061	135.534	141.727	189.44	190.301	179.031	198.074	207.103	199.493	0.000870012	0.0316047	0.339245	0.000145708
PPP1CB	https://www.ensembl.org/id/ENSG00000213639	175.682	170.678	168.997	168.813	172.585	178.088	176.014	164.721	164.499	189.548	201.004	192.351	0.704593	0.00744342	0.48923	0.00973897
CDC37	https://www.ensembl.org/id/ENSG00000105401	185.724	204.414	160.531	202.18	176.651	194.221	174.43	174.583	151.782	177.108	162.361	156.955	0.646006	0.887976	0.337126	0.0600818
TMEM54	https://www.ensembl.org/id/ENSG00000121900	171.016	167.919	184.327	144.933	142.511	135.631	150.506	158.185	181.811	218.398	228.52	234.258	0.00911697	0.00981369	0.380551	0.000323985
APEH	https://www.ensembl.org/id/ENSG00000164062	201.031	185.614	148.317	191.264	195.549	197.954	172.874	184.907	159.401	156.323	161.273	162.424	0.400015	0.230482	0.755585	0.000210951
ZFP36L1	https://www.ensembl.org/id/ENSG00000185650	140.284	145.175	157.12	286.485	267.451	294.608	134.002	137.45	128.021	141.413	141.557	140.74	0.000410282	0.0980325	0.0833959	0.00318913
SSR4	https://www.ensembl.org/id/ENSG00000180879	160.228	150.963	159.193	212.665	227.688	204.485	151.883	154.648	162.049	171.22	181.796	176.821	0.00604473	0.00902368	0.893478	0.0171554
ENO2	https://www.ensembl.org/id/ENSG00000111674	189.301	231.424	202.752	122.975	106.069	118.498	216.528	228.786	207.583	174.751	152.901	156.426	0.00938832	0.00364943	0.531436	0.00715402
PACSIN2	https://www.ensembl.org/id/ENSG00000100266	167.034	167.752	153.954	195.201	171.776	194.001	170.566	171.742	159.493	184.421	186.224	184.5	0.0664577	0.0422308	0.505218	0.822625
ALDH1A3	https://www.ensembl.org/id/ENSG00000184254	116.753	120.761	101.216	482.298	456.767	509.066	46.2234	48.8803	34.0382	59.7567	67.8081	61.5133	0.000449332	0.0297958	0.00100759	0.00100491
ALDH3A2	https://www.ensembl.org/id/ENSG00000072210	170.722	180.84	140.587	225.8	185.467	223.278	156.898	155.729	128.923	182.457	174.312	175.355	0.0562135	0.0712641	0.332348	0.115225
LPCAT4	https://www.ensembl.org/id/ENSG00000176454	179.641	224.237	220.379	111.957	74.1043	104.513	204.201	206.945	189.387	233.269	174.602	173.438	0.00429128	0.78058	0.6458	0.0208134
RAD23A	https://www.ensembl.org/id/ENSG00000179262	178.501	173.293	156.492	171.694	172.776	168.713	167.601	162.271	165.293	184.275	193.672	194.577	0.83023	0.00691496	0.581211	0.0171363
NOB1	https://www.ensembl.org/id/ENSG00000141101	175.192	167.856	175.598	172.985	178.994	171.448	176.959	172.136	173.683	163.022	181.68	179.356	0.664735	0.949497	0.664624	0.975774
KIF5B	https://www.ensembl.org/id/ENSG00000170759	161.412	168.286	164.049	163.002	146.735	178.313	171.15	167.759	168.711	198.47	200.371	199.325	0.856124	9.80841e-05	0.132582	0.0560285
MDH1	https://www.ensembl.org/id/ENSG00000014641	188.756	176.492	147.475	196.487	193.293	196.438	174.083	170.107	154.908	158.835	171.361	156.474	0.182427	0.609208	0.760726	0.0151041
STIP1	https://www.ensembl.org/id/ENSG00000168439	194.137	188.143	169.606	171.555	173.39	178.131	166.679	173.983	163.533	160.884	172.198	169.611	0.322105	0.918811	0.152072	0.178074
MRPL12	https://www.ensembl.org/id/ENSG00000262814	225.999	214.158	175.413	177.648	191.859	176.512	163.754	159.69	145.204	149.309	155.164	143.48	0.26496	0.364539	0.0709714	0.00774256
MGST3	https://www.ensembl.org/id/ENSG00000143198	189.822	179.825	180.931	138.945	144.527	137.835	183.766	180.333	180.031	178.514	193.204	185.644	0.000740706	0.409713	0.577362	0.00274034
IGFBP6	https://www.ensembl.org/id/ENSG00000167779	305.484	272.768	294.098	72.1944	75.8328	69.8442	233.009	230.976	224.436	92.1135	100.138	101.644	0.00144254	5.6371e-06	0.0180108	0.00394157
CS	https://www.ensembl.org/id/ENSG00000062485	168.594	176.627	153.448	145.601	142.359	151.27	178.475	184.86	172.764	195.538	200.141	201.735	0.0856113	0.0135429	0.201363	0.000155622
PGRMC1	https://www.ensembl.org/id/ENSG00000101856	208.469	208.225	194.332	109.185	112.231	113.564	213.341	212.753	202.007	159.016	171.576	166.528	0.00139024	0.00108957	0.395688	0.0019642
MRPL18	https://www.ensembl.org/id/ENSG00000112110	174.68	172.758	173.817	189.469	193.472	192.829	160.473	147.613	159.956	166.459	173.104	162.824	0.00134221	0.0981744	0.0496077	0.00730218
TCEAL8	https://www.ensembl.org/id/ENSG00000180964	163.774	167.477	177.298	181.353	182.732	190.508	172.985	158.74	161.228	173.65	170.548	164.474	0.0415176	0.377597	0.432947	0.0176022
RAB5IF	https://www.ensembl.org/id/ENSG00000101084	178.964	166.89	165.612	208.66	204.975	209.021	152.863	146.666	144.242	155.84	168.517	157.477	0.00832003	0.0653535	0.0163821	0.00384136
RCN1	https://www.ensembl.org/id/ENSG00000049449	171.527	180.374	157.429	188.081	178.004	189.475	171.788	174.091	159.359	156.514	169.225	162.2	0.133201	0.383852	0.875428	0.0119517
SLC22A18	https://www.ensembl.org/id/ENSG00000110628	147.33	146.067	161.073	137.575	132.923	131.139	175.018	173.397	197.62	218.672	210.828	224.683	0.0518272	0.0264645	0.0385737	0.000420448
ASPH	https://www.ensembl.org/id/ENSG00000198363	153.342	159.995	149.266	113.7	102.202	119.699	194.365	194.635	195.374	220.681	227.47	224.967	0.00425203	0.00378101	0.00552935	0.000628917
FLNA	https://www.ensembl.org/id/ENSG00000196924	166.937	156.578	113.556	150.227	139.938	167.757	219.615	225.242	186.774	174.601	169.369	181.104	0.729232	0.0880637	0.0371958	0.0944889
ADIPOR2	https://www.ensembl.org/id/ENSG00000006831	160.766	167.016	174.643	140.126	127.284	154.289	175.351	173.975	195.5	194.87	192.599	193.035	0.054896	0.228612	0.17096	0.0203349
SLPI	https://www.ensembl.org/id/ENSG00000124107	137.139	129.759	127.099	255.592	279.228	264.153	116.002	107.262	124.89	162.616	169.972	169.949	0.000653145	0.00328659	0.0751896	0.00214942
CYB5R3	https://www.ensembl.org/id/ENSG00000100243	178.081	170.595	177.273	193.615	185.764	189.926	161.849	163.096	166.119	147.946	151.487	157.85	0.0117121	0.0437207	0.0219622	0.000702339
TRAM1	https://www.ensembl.org/id/ENSG00000067167	157.727	150.295	155.012	186.634	182.323	196.026	167.396	164.197	155.455	168.975	178.801	180.07	0.00474465	0.0531023	0.142741	0.0831515
SLC25A3	https://www.ensembl.org/id/ENSG00000075415	183.777	170.593	172.636	134.615	142.934	135.569	183.318	182.846	195.048	173.145	183.339	183.223	0.00274561	0.24414	0.117038	0.00079168
ITM2C	https://www.ensembl.org/id/ENSG00000135916	212.779	194.63	210.334	97.9188	99.9454	100.035	193.898	192.277	213.169	167.421	178.869	172.157	0.00251407	0.0382776	0.524956	0.00140215
MLEC	https://www.ensembl.org/id/ENSG00000110917	201.3	190.654	162.444	151.898	144.487	165.436	172.517	176.145	153.317	165.596	175.206	171.805	0.0989378	0.677937	0.280948	0.0928411
NEDD8	https://www.ensembl.org/id/ENSG00000129559	184.575	186.059	166.774	200.939	196.644	175.685	153.079	141.49	152.542	161.059	159.23	152.333	0.299531	0.147459	0.0210313	0.0386807
CTNNB1	https://www.ensembl.org/id/ENSG00000168036	169.803	168.637	143.026	209.025	197.945	226.456	154.92	160.055	143.025	150.913	153.561	152.374	0.0137343	0.94656	0.491441	0.0186013
HES1	https://www.ensembl.org/id/ENSG00000114315	242.022	174.831	159.812	170.289	183.919	167.521	158.018	158.922	120.012	179.09	165.853	148.879	0.54631	0.297158	0.199929	0.42121
SLC12A2	https://www.ensembl.org/id/ENSG00000064651	196.881	220.631	161.827	116.063	113.069	131.921	222.488	229.353	156.298	157.184	163.911	158.022	0.0393971	0.205252	0.757716	0.0132514
CNN2	https://www.ensembl.org/id/ENSG00000064666	163.974	163.339	173.4	147.723	160.765	151.394	178.846	179.255	187.846	168.234	171.162	176.777	0.0566231	0.0633476	0.0266909	0.0209365
AP2M1	https://www.ensembl.org/id/ENSG00000161203	187.626	194.966	146.877	191.296	175.532	186.716	170.841	171.337	146.442	150.667	152.239	147.472	0.652132	0.259164	0.481416	0.0124353
UBA1	https://www.ensembl.org/id/ENSG00000130985	167.663	154.919	135.649	158.292	162.796	169.527	174.763	179.375	179.989	170.341	176.645	188.77	0.368324	0.931019	0.108633	0.0898697
DLST	https://www.ensembl.org/id/ENSG00000119689	183.474	185.909	163.138	164.322	157.734	175.033	174.699	167.26	167.536	155.662	163.756	159.505	0.258624	0.0392802	0.402659	0.360002
SZRD1	https://www.ensembl.org/id/ENSG00000055070	180.416	168.08	156.496	181.483	184.856	187.401	167.203	164.696	173.039	144.263	152.362	152.99	0.135882	0.0082192	0.998227	0.00117043
NONO	https://www.ensembl.org/id/ENSG00000147140	189.1	194.741	174.709	145.577	128.85	142.913	194.088	189.283	188.629	158.325	152.888	153.436	0.00423952	0.000125577	0.535688	0.0811049
SDCBP2	https://www.ensembl.org/id/ENSG00000125775	100.483	99.1932	124.065	294.122	265.912	285.824	113.676	113.945	132.444	172.158	154.454	155.15	0.000117353	0.00889963	0.304694	0.000539089
NARS1	https://www.ensembl.org/id/ENSG00000134440	170.143	169.709	148.2	162.25	146.384	168.906	166.57	155.23	150.331	184.479	189.86	190.798	0.740222	0.0132436	0.579208	0.0395189
PYGB	https://www.ensembl.org/id/ENSG00000100994	162.656	152.716	121.543	180.553	178.326	185.588	161.082	163.047	143.268	183.325	183.416	185.5	0.0973906	0.0445137	0.517984	0.352233
NDUFB8	https://www.ensembl.org/id/ENSG00000166136	178.712	171.783	150.917	186.66	190.887	185.375	153.256	147.753	128.491	166.103	180.917	156.428	0.128546	0.0760016	0.100512	0.101522
IER2	https://www.ensembl.org/id/ENSG00000160888	180.316	160.139	147.304	184.228	153.961	168.626	165.132	157.959	146.875	186.753	176.24	168.573	0.650615	0.0516673	0.625271	0.473254
PPP1CC	https://www.ensembl.org/id/ENSG00000186298	189.982	186.59	172.656	123.623	110.985	126.791	198.784	192.592	185.267	167.642	167.849	172.171	0.000985295	0.0176653	0.243378	0.00587986
LRRC8A	https://www.ensembl.org/id/ENSG00000136802	129.094	127.175	122.37	176.757	157.807	179.487	152.827	158.922	177.383	201.573	196.814	212.273	0.0159305	0.0146209	0.0307474	0.0222085
GALNT3	https://www.ensembl.org/id/ENSG00000115339	142.446	137.596	172.479	105.483	97.574	109.639	177.491	175.743	211.281	218.021	216.573	227.236	0.0400314	0.0973057	0.0789058	1.86315e-05
TMEM259	https://www.ensembl.org/id/ENSG00000182087	154.266	198.099	166.865	184.988	135.09	160.889	160.414	163.979	153.659	191.849	158.777	160.582	0.547628	0.41375	0.403623	0.607011
CHMP2A	https://www.ensembl.org/id/ENSG00000130724	144.396	144.101	151.73	207.965	223.362	203.029	140.834	134.109	143.278	157.227	171.748	167.36	0.00376447	0.0106712	0.119583	0.00503692
CAST	https://www.ensembl.org/id/ENSG00000153113	161.091	154.214	142.905	135.073	120.671	141.716	196.229	198.929	184.904	182.464	185.096	185.417	0.0697748	0.165305	0.00456374	0.0125769
ABHD17C	https://www.ensembl.org/id/ENSG00000136379	183.755	176.164	185.072	128.026	125.549	127.712	175.049	178.706	188.341	164.987	178.55	174.333	0.00137766	0.22527	0.852779	0.00610419
RABGGTB	https://www.ensembl.org/id/ENSG00000137955	141.956	141.421	159.238	150.083	130.611	154.376	152.133	152.322	170.604	222.224	209.27	201.907	0.802156	0.00348085	0.270971	0.00252821
MMADHC	https://www.ensembl.org/id/ENSG00000168288	152.77	149.074	158.542	152.066	159.55	156.963	164.803	158.878	176.593	176.186	193.378	185.808	0.483455	0.063405	0.108094	0.0161201
FGFBP1	https://www.ensembl.org/id/ENSG00000137440	256.946	245.62	228.54	75.2283	68.8829	75.9825	192.245	190.01	153.069	162.136	163.76	167.834	0.00127461	0.389075	0.0174228	1.08066e-05
TAF7	https://www.ensembl.org/id/ENSG00000178913	160.441	164.024	154.659	156.854	146.523	166.603	179.049	181.393	169.333	171.957	165.179	163.519	0.668382	0.105532	0.0245365	0.213189
FKBP2	https://www.ensembl.org/id/ENSG00000173486	164.727	165.45	164.427	180.419	187.006	168.569	161.668	140.411	157.14	159.963	168.242	160.972	0.124408	0.259209	0.209384	0.0832818
PPM1G	https://www.ensembl.org/id/ENSG00000115241	189.656	184.51	154.317	159.205	167.249	161.483	164.358	166.624	157.788	148.224	160.839	160.02	0.344484	0.25914	0.352558	0.269644
PIGR	https://www.ensembl.org/id/ENSG00000162896	131.456	115.889	104.411	111.53	120.325	135.126	123.485	127.477	95.3321	293.018	303.632	311.873	0.652449	0.000437138	0.894159	4.88753e-05
SRSF4	https://www.ensembl.org/id/ENSG00000116350	161.812	168.836	184.236	131.478	123.404	132.423	175.103	164.674	176.019	181.435	184.534	186.702	0.0127313	0.0611174	0.970386	0.000399559
COPB1	https://www.ensembl.org/id/ENSG00000129083	146.65	136.253	142.163	144.858	129.858	155.006	154.863	153.646	180.849	211.21	204.751	210.297	0.858309	0.0305799	0.125657	0.00836901
MRPS18B	https://www.ensembl.org/id/ENSG00000204568	189.262	167.646	159.87	154.521	154.441	154.919	176.941	169.497	160.466	158.916	166.221	155.671	0.182753	0.212341	0.763173	0.212043
TUBA1C	https://www.ensembl.org/id/ENSG00000167553	214.485	202.773	170.488	92.1173	96.9042	91.6175	198.655	201.144	210.567	154.285	171.212	162.858	0.014931	0.00345591	0.629551	0.00228657
MRPL53	https://www.ensembl.org/id/ENSG00000204822	161.323	157.561	159.177	170.167	188.487	158.214	164.718	163.124	165.412	154.831	162.368	158.076	0.278613	0.100167	0.0236928	0.252636
CXCL3	https://www.ensembl.org/id/ENSG00000163734	134.034	132.635	84.2174	233.846	173.574	236.559	144.057	142.924	67.8913	220.796	203.812	188.445	0.0223792	0.0619928	0.967187	0.68117
NCOA4	https://www.ensembl.org/id/ENSG00000266412	159.915	148.835	134.626	171.978	173.379	193.184	166.565	168.711	159.02	155.83	163.601	164.945	0.034227	0.463923	0.133103	0.103483
FAM3C	https://www.ensembl.org/id/ENSG00000196937	143.183	152.302	155.984	167.879	150.747	164.348	167.656	167.371	167.29	168.441	178.713	174.772	0.186047	0.160377	0.0467655	0.114635
PSMD3	https://www.ensembl.org/id/ENSG00000108344	177.443	164.563	144.866	166.853	145.047	160.797	173.05	169.344	161.127	163.386	164.581	164.983	0.704513	0.422891	0.6274	0.408052
GNPAT	https://www.ensembl.org/id/ENSG00000116906	215.093	218.772	189.302	168.241	155.14	172.56	149.278	149.695	127.502	137.528	139.23	132.076	0.0257387	0.511537	0.00600895	0.0191779
MTPN	https://www.ensembl.org/id/ENSG00000105887	163.383	159.71	146.185	149.549	154.358	167.126	166.318	170.343	159.288	166.914	175.268	174.484	0.940806	0.177013	0.235087	0.0822663
EIF1AX	https://www.ensembl.org/id/ENSG00000173674	203.088	204.57	169.95	135.9	134.877	139.145	183.514	186.318	155.304	144.743	152.243	142.912	0.0370415	0.0932618	0.310154	0.0551606
ATP6V0E1	https://www.ensembl.org/id/ENSG00000113732	147.22	146.257	148.092	186.968	209.87	183.27	165.037	161.504	160.129	142.529	152.587	147.577	0.0305213	0.0210816	0.0047033	0.0218182
APH1A	https://www.ensembl.org/id/ENSG00000117362	172.73	166.91	162.487	151.772	157.616	144.405	165.704	167.534	166.744	157.608	172.215	165.3	0.0318421	0.738958	0.833254	0.0733752
BRI3	https://www.ensembl.org/id/ENSG00000164713	156.446	147.901	185.892	143.135	138.73	139.185	163.204	157.044	190.154	173.291	176.769	179.098	0.181261	0.602944	0.684504	0.000100913
FLII	https://www.ensembl.org/id/ENSG00000177731	161.621	163.168	132.279	167.314	151.229	176.953	177.816	183.313	168.089	151.821	153.793	159.407	0.369106	0.023778	0.124351	0.307097
CLIC3	https://www.ensembl.org/id/ENSG00000169583	248.618	248.147	237.151	72.0502	67.5729	65.3018	204.04	201.955	175.121	131.937	147.282	146.488	2.74121e-05	0.0154878	0.0201622	0.00165057
IFI27L2	https://www.ensembl.org/id/ENSG00000119632	147.041	147.328	143.727	175.815	188.956	167.884	158.442	142.849	152.008	165.789	180.989	172.881	0.032245	0.0247404	0.379849	0.599987
NAP1L1	https://www.ensembl.org/id/ENSG00000187109	168.799	171.066	168.178	128.401	125.379	132.329	189.825	184.838	184.109	160.872	170.011	159.833	0.000591507	0.00771932	0.00392138	0.00175321
RSL24D1	https://www.ensembl.org/id/ENSG00000137876	164.071	158.848	185.757	124.492	133.043	132.036	164.911	163.64	178.41	176.45	182.782	173.745	0.0305723	0.203945	0.955578	0.00023025
ANO1	https://www.ensembl.org/id/ENSG00000131620	179.018	174.162	148.302	111.815	103.667	125.229	196.596	194.522	172.045	171.075	180.037	180.9	0.0131857	0.318592	0.174019	0.00306209
MYOF	https://www.ensembl.org/id/ENSG00000138119	155.601	160.026	113.786	168.447	139.283	194.641	190.472	192.558	139.919	162.708	157.052	162.833	0.326325	0.516813	0.242327	0.720931
CD68	https://www.ensembl.org/id/ENSG00000129226	128.117	113.875	138.312	151.415	152.791	146.162	160.998	165.493	190.932	188.432	199.419	199.689	0.0713752	0.114865	0.0199273	0.00147256
DPY30	https://www.ensembl.org/id/ENSG00000162961	185.5	181.639	173.516	164.133	160.63	165.362	161.413	150.822	143.28	143.01	154.163	151.34	0.0281016	0.730358	0.0148542	0.0381487
ARF3	https://www.ensembl.org/id/ENSG00000134287	171.462	160.856	145.281	155.822	160.995	160.562	165.483	167.452	158.365	153.487	164.333	169.003	0.993273	0.797359	0.618642	0.5733
PNRC2	https://www.ensembl.org/id/ENSG00000189266	182.507	202.468	172.393	140.056	126.742	140.695	183.961	190.188	159.909	146.792	145.262	140.274	0.015283	0.0610307	0.57606	0.202565
SNRPA1	https://www.ensembl.org/id/ENSG00000131876	199.735	204.163	196.519	113.534	92.8492	111.48	172.777	170.149	158.871	180.509	166.48	164.132	0.00230372	0.665649	0.00635476	0.00191212
EEF1D	https://www.ensembl.org/id/ENSG00000104529	159.958	148.844	162.995	168.159	184.845	165.237	147.071	144.569	169.856	155.69	161.663	157.416	0.114822	0.640716	0.731228	0.131992
HNRNPH2	https://www.ensembl.org/id/ENSG00000126945	164.833	164.82	145.961	162.988	165.055	175.531	165.946	165.802	156.776	149.808	157.955	149.93	0.288357	0.06533	0.582876	0.0375431
PSMB7	https://www.ensembl.org/id/ENSG00000136930	172.859	164.846	140.233	174.306	167.128	164.429	157.9	159.707	146.082	156.907	162.598	157.39	0.446835	0.420055	0.69005	0.0608328
PSMB6	https://www.ensembl.org/id/ENSG00000142507	170.25	159.129	147.611	186.931	192.843	171.434	148.317	138.717	132.11	159.56	166.961	147.523	0.0536794	0.0699299	0.0813037	0.0401151
OS9	https://www.ensembl.org/id/ENSG00000135506	165.028	149.615	147.998	143.248	142.657	146.608	173.396	170.355	178.697	158.389	171.771	171.748	0.201044	0.267812	0.0493956	0.0280443
SF3A2	https://www.ensembl.org/id/ENSG00000104897	166.471	151.006	159.162	139.922	138.664	134.349	166.765	172.731	195.567	165.227	154.694	174.228	0.0293033	0.272325	0.143299	0.0321877
NUCB1	https://www.ensembl.org/id/ENSG00000104805	149.229	132.694	138.429	152.348	158.085	149.61	159.304	161.582	170.934	172.979	182.316	190.377	0.0938672	0.0494052	0.0196592	0.0155542
GNL3	https://www.ensembl.org/id/ENSG00000163938	177.019	190.352	167.125	129.304	104.749	126.539	175.508	169.306	148.5	184.58	177.586	167.301	0.00516045	0.289824	0.266704	0.00601564
DDX39B	https://www.ensembl.org/id/ENSG00000198563	165.789	184.921	146.466	141.75	129.737	147.077	169.648	177.574	155.541	169.426	165.422	163.945	0.12738	0.858727	0.893255	0.0259593
MRPL51	https://www.ensembl.org/id/ENSG00000111639	182.608	169.438	173.053	144.867	161.222	142.716	159.716	158.051	167.764	152.127	150.548	150.798	0.0282099	0.0669522	0.0599723	0.815313
PSMD13	https://www.ensembl.org/id/ENSG00000185627	167.559	167.741	142.255	175.057	174.992	166.187	145.874	152.638	143.255	156.342	165.552	155.34	0.263708	0.0522319	0.292252	0.0418966
C19orf53	https://www.ensembl.org/id/ENSG00000104979	170.369	157.734	157.876	171.513	183.577	162.978	157.887	139.957	149.878	151.351	153.04	156.485	0.224526	0.491327	0.131441	0.0778202
POMP	https://www.ensembl.org/id/ENSG00000132963	170.744	165.35	147.57	161.082	172.286	158.469	159.105	149.928	145.914	152.322	169.053	158.011	0.759273	0.267203	0.314908	0.557812
KIAA1522	https://www.ensembl.org/id/ENSG00000162522	142.084	142.569	141.24	126.452	114.172	130.182	175.921	176.955	190.2	186.339	185.797	197.449	0.0620137	0.214933	0.0130923	0.000559644
MRPS24	https://www.ensembl.org/id/ENSG00000062582	165.952	164.72	171.579	154.07	157.795	139.633	163.329	154.985	174.762	142.355	159.22	157.774	0.0778679	0.226738	0.656855	0.752077
TMC5	https://www.ensembl.org/id/ENSG00000103534	122.286	122.639	119.438	131.838	110.702	138.271	196.548	196.395	190.917	192.132	187.327	189.379	0.578796	0.102042	4.07622e-05	0.0151708
AZIN1	https://www.ensembl.org/id/ENSG00000155096	159.331	153.934	148.603	131.692	131.28	141.639	158.065	159.24	156.604	178.113	187.317	187.281	0.0143905	0.00986838	0.323385	0.000437557
DDX17	https://www.ensembl.org/id/ENSG00000100201	161.824	205.794	133.124	162.958	123.412	165.314	180.597	192.626	114.47	175.298	141.147	136.131	0.556339	0.696677	0.8992	0.987848
CUTA	https://www.ensembl.org/id/ENSG00000112514	173.354	170.584	192.087	147.199	155.582	133.427	148.591	146.757	169.915	142.287	158.753	152.847	0.0236511	0.694051	0.0792179	0.508118
DSP	https://www.ensembl.org/id/ENSG00000096696	156.073	147.441	126.155	169.127	152.423	193.102	162.012	151.657	141.771	163.128	158.866	168.407	0.133153	0.173945	0.47126	0.567583
PLS1	https://www.ensembl.org/id/ENSG00000120756	159.669	154.597	136.222	118.241	111.864	130.938	169.015	165.494	148.41	191.291	201.583	201.358	0.0327318	0.0136331	0.321669	0.000818161
UBE2M	https://www.ensembl.org/id/ENSG00000130725	160.714	151.462	155.249	187.651	188.818	183.729	142.066	139.141	142.494	138.842	151.409	146.813	0.00164474	0.349073	0.0209124	0.0031156
SLX1A	https://www.ensembl.org/id/ENSG00000132207	157.161	165.733	165.313	214.555	213.116	202.429	121.691	121.044	109.192	147.078	126.966	142.72	0.00087225	0.050096	0.00133889	0.00135211
CLTB	https://www.ensembl.org/id/ENSG00000175416	157.951	152.2	150.598	197.103	194.365	175.672	144.962	137.676	137.239	140.364	151.352	146.068	0.0248925	0.217505	0.015747	0.0118179
SRPRA	https://www.ensembl.org/id/ENSG00000182934	122.508	114.173	117.896	189.272	186.886	195.121	119.965	124.173	145.844	183.772	185.644	193.293	3.026e-05	0.011291	0.276051	0.495526
XRCC5	https://www.ensembl.org/id/ENSG00000079246	191.773	177.476	127.226	157.977	158.007	167.806	164.167	168.091	139.275	135.626	148.135	142.529	0.850087	0.23109	0.726996	0.0174403
CDC42EP1	https://www.ensembl.org/id/ENSG00000128283	144.792	142.195	134.236	138.86	144.832	134.438	145.39	159.85	150.476	188.043	193.683	200.642	0.825384	0.00179373	0.100934	0.000384718
STRAP	https://www.ensembl.org/id/ENSG00000023734	153.837	154.886	147.448	168.626	160.878	167.384	145.897	149.272	140.846	155.319	165.098	161.226	0.0153821	0.0161176	0.117595	0.245809
DNAJB1	https://www.ensembl.org/id/ENSG00000132002	143.422	131.412	136.561	169.271	164.24	172.207	152.192	149.435	167.124	159.453	157.709	167.285	0.00283714	0.461803	0.0521979	0.135672
TRIB3	https://www.ensembl.org/id/ENSG00000101255	145.096	142.385	136.018	109.93	108.267	110.427	175.891	182.278	185.699	185.749	191.59	194.207	0.00501361	0.0738373	0.000534001	0.000481411
GALE	https://www.ensembl.org/id/ENSG00000117308	139.962	147.331	120.793	228.151	211.654	217.299	129.742	141.717	114.925	142.615	142.744	129.86	0.00196527	0.354251	0.549193	0.000258596
CLTC	https://www.ensembl.org/id/ENSG00000141367	143.715	130.805	116.74	142.54	140.164	162.707	157.065	151.494	161.939	177.987	185.757	194.568	0.163523	0.0104548	0.0621107	0.0160523
YIPF2	https://www.ensembl.org/id/ENSG00000130733	119.916	113.45	159.611	147.016	137.898	136.283	135.54	121.408	165.578	208.959	205.507	213.129	0.584801	0.0314308	0.639271	0.000177999
PNPLA2	https://www.ensembl.org/id/ENSG00000177666	120.07	116.933	136.198	204.149	197.825	191.572	134.138	138.571	152.042	156.865	150.671	160.301	0.00118982	0.0985283	0.100043	0.0010568
SLC6A8	https://www.ensembl.org/id/ENSG00000130821	199.022	202.865	200.168	83.5282	77.0396	81.2363	190.088	191.139	192.212	141.341	152.21	148.185	5.99456e-06	0.00402279	0.00476735	0.000218928
SREBF1	https://www.ensembl.org/id/ENSG00000072310	114.894	132.059	124.237	155.472	133.371	152.578	163.631	166.748	156.555	197.37	176.851	184.802	0.0575877	0.0378608	0.00512173	0.0134326
NDUFS4	https://www.ensembl.org/id/ENSG00000164258	147.783	137.73	139.404	154.304	160.657	153.624	148.235	151.361	154.311	165.468	171.823	172.64	0.0227737	0.00353362	0.0694379	0.0124023
BIK	https://www.ensembl.org/id/ENSG00000100290	171.505	172.876	167.459	166.763	163.823	165.784	141.542	142.313	133.268	145.998	145.259	140.287	0.0666764	0.244166	0.00201855	0.00200093
CCDC85B	https://www.ensembl.org/id/ENSG00000175602	182.991	167.736	157.074	151.198	153.613	140.62	165.117	161.232	164.321	134.053	144.413	134.482	0.0911216	0.0099991	0.528233	0.109126
ATP6V1E1	https://www.ensembl.org/id/ENSG00000131100	132.27	131.897	131.31	210.814	228.25	215.597	124.001	126.561	123.815	140.299	145.283	146.524	0.00352656	0.00345718	0.0100252	0.00206387
RALB	https://www.ensembl.org/id/ENSG00000144118	154.786	154.37	153.286	162.078	160.321	159.87	138.305	143.763	137.649	155.251	168.896	167.427	0.00217505	0.0180309	0.0143311	0.549024
SFT2D1	https://www.ensembl.org/id/ENSG00000198818	148.901	160.794	156.177	160.115	144.635	161.79	143.121	147.251	139.138	169.472	164.759	155.345	0.974453	0.0222886	0.0516037	0.329824
TOP1	https://www.ensembl.org/id/ENSG00000198900	144.754	149.058	128.893	187.448	184.345	196.879	142.925	138.983	128.278	148.686	149.943	149.554	0.00474794	0.100453	0.611995	0.00820789
UXT	https://www.ensembl.org/id/ENSG00000126756	171.525	161.468	155.884	136.337	153.879	122.687	159.177	154.204	170.057	153.872	159.313	150.596	0.0885601	0.304142	0.795539	0.194797
PSMA1	https://www.ensembl.org/id/ENSG00000129084	158.893	160.724	146.409	142.314	143.006	150.148	157.362	156.712	145.991	156.762	167.717	161.475	0.138372	0.1523	0.750437	0.0157255
DDRGK1	https://www.ensembl.org/id/ENSG00000198171	152.684	157.341	162.287	150.399	125.173	140.715	165.781	147.43	155.15	174.604	158.906	155.593	0.112703	0.432189	0.840294	0.0641678
HNRNPD	https://www.ensembl.org/id/ENSG00000138668	203.472	239.945	156.194	142.128	133.006	143.426	181.517	182.002	127.546	122.245	109.333	104.001	0.128058	0.0927066	0.302514	0.0182654
MAPRE1	https://www.ensembl.org/id/ENSG00000101367	158.565	152.973	136.608	162.098	169.335	171.063	148.966	153.374	151.875	141.246	147.574	148.06	0.0949792	0.101568	0.789796	0.00397038
AURKAIP1	https://www.ensembl.org/id/ENSG00000175756	170.089	165.069	163.099	170.74	172.202	157.331	141.784	130.709	138.13	135.686	151.693	144.699	0.905449	0.282514	0.00307447	0.0264931
MACROH2A1	https://www.ensembl.org/id/ENSG00000113648	152.552	157.079	120.435	223.125	216.214	215.91	126.31	129.995	107.938	128.477	134.238	128.901	0.0193841	0.311543	0.193163	1.31077e-05
SEC11A	https://www.ensembl.org/id/ENSG00000140612	171.244	182.357	166.854	131.607	128.256	133.783	153.749	162.933	157.962	146.512	158.509	146.717	0.00651995	0.195002	0.0595117	0.0264004
IGBP1	https://www.ensembl.org/id/ENSG00000089289	143.568	137.679	150.596	155.262	155.872	154.812	167.101	160.597	177.572	136.803	152.778	147.416	0.0920723	0.0290082	0.0193243	0.175595
PSMD2	https://www.ensembl.org/id/ENSG00000175166	161.346	158.575	114.391	176.94	175.235	179.65	151.788	156.403	131.722	140.724	142.398	150.537	0.165195	0.817028	0.919585	0.00335559
CTNND1	https://www.ensembl.org/id/ENSG00000198561	135.013	140.187	131.078	131.337	119.842	143.248	170.5	164.823	165.999	180.354	173.269	180.029	0.629277	0.0231439	0.00112574	0.0132019
GMDS	https://www.ensembl.org/id/ENSG00000112699	165.946	156.936	138.736	184.646	191.431	185.322	125.416	122.783	117.077	141.405	154.949	151.032	0.0452172	0.00770341	0.0466901	0.00336484
WASF2	https://www.ensembl.org/id/ENSG00000158195	130.278	120.923	134.607	121.65	115.567	128.721	166.926	162.572	206.764	177.433	180.192	187.808	0.298554	0.849967	0.0608073	0.000324757
MET	https://www.ensembl.org/id/ENSG00000105976	138.258	134.303	106.065	107.941	98.9229	120.382	194.615	198.369	159.974	187.89	190.943	195.623	0.23706	0.619111	0.0228766	0.00252455
KHSRP	https://www.ensembl.org/id/ENSG00000088247	179.477	179.136	145.681	129.173	126.789	136.67	174.803	176.76	158.226	138.422	141.583	145.217	0.0713572	0.0306362	0.894065	0.0460893
SLC25A39	https://www.ensembl.org/id/ENSG00000013306	165.133	160.861	142.997	158.679	170.018	162.459	137.901	141.623	139.656	145.25	149.175	148.825	0.402142	0.00879314	0.130733	0.0288532
CTSE	https://www.ensembl.org/id/ENSG00000196188	217.389	204.023	167.232	121.079	121.286	125.575	149.614	159.043	133.86	136.295	144.65	142.252	0.0380144	0.479315	0.0640472	0.00612739
MYH14	https://www.ensembl.org/id/ENSG00000105357	146.434	135.517	132.855	148.838	145.962	154.76	149.124	143.229	149.873	164.857	169.058	179.23	0.0897298	0.0167307	0.145612	0.0197651
TWF1	https://www.ensembl.org/id/ENSG00000151239	151.532	151.003	132.709	145.511	141.227	161.48	145.196	145.226	136.606	167.434	173.383	167.626	0.646404	0.00238812	0.716471	0.0713298
CLTA	https://www.ensembl.org/id/ENSG00000122705	154.143	149.588	145.769	168.581	173.996	167.746	142.206	140.072	150.289	137.449	145.507	142.513	0.0033253	0.579142	0.229554	0.00088558
SEPTIN9	https://www.ensembl.org/id/ENSG00000184640	140.528	133.735	118.136	186.237	188.846	190.692	140.332	143.927	143.838	137.766	144.032	146.426	0.0106691	0.989062	0.211654	0.000603876
TRAPPC1	https://www.ensembl.org/id/ENSG00000170043	160.243	156.58	148.305	170.662	170.979	164.297	139.892	134.932	141.271	133.677	151.121	141.493	0.0399569	0.580479	0.0253558	0.0211039
MAGOH	https://www.ensembl.org/id/ENSG00000162385	191.444	181.051	164.319	127.855	129.561	127.729	160.58	157.654	144.438	133.585	152.358	138.302	0.0230469	0.164574	0.0683014	0.145536
USO1	https://www.ensembl.org/id/ENSG00000138768	128.215	128.893	128.05	132.665	113.157	140.622	161.712	163.041	158.15	185.349	180.435	184.756	0.962884	0.000457712	0.00152685	0.0186234
SDF4	https://www.ensembl.org/id/ENSG00000078808	152.893	145.085	146.032	157.115	162.409	165.258	145.338	141.335	143.919	145.463	150.775	149.403	0.0166269	0.0695649	0.203568	0.0142865
CHP1	https://www.ensembl.org/id/ENSG00000187446	138.201	136.726	131.792	160.265	162.66	168.812	131.59	132.968	137.092	165.456	168.749	169.989	0.00121901	0.000115485	0.544247	0.243997
ZMAT2	https://www.ensembl.org/id/ENSG00000146007	135.802	132.867	136.107	161.103	169.183	162.696	148.054	147.463	148.106	149.133	156.316	155.367	0.0026569	0.124815	0.00488684	0.0330925
CKS1B	https://www.ensembl.org/id/ENSG00000173207	213.263	211.938	218.249	59.2198	61.0371	58.7522	190.578	177.115	215.074	127.895	138.888	128.134	2.70783e-05	0.0215351	0.207532	0.00186642
STAU1	https://www.ensembl.org/id/ENSG00000124214	143.047	137.706	145.389	133.718	137.355	142.312	158.766	156.084	162.657	154.955	162.957	164.934	0.276368	0.651484	0.00490638	0.00472562
UBXN1	https://www.ensembl.org/id/ENSG00000162191	139.123	133.717	144.693	188.168	193.819	179.567	126.363	123.287	128.441	143.364	152.543	146.143	0.00105276	0.00561	0.0361066	0.00236573
PA2G4	https://www.ensembl.org/id/ENSG00000170515	183.912	173.621	132.452	186.098	189.34	190.987	142.897	145.541	124.986	104.458	118.077	105.524	0.245859	0.0271928	0.241457	0.00134188
ARPC4	https://www.ensembl.org/id/ENSG00000241553	182.681	173.262	133.849	166.079	177.688	169.612	139.106	141.809	116.447	125.855	137.865	133.261	0.655073	0.989454	0.165249	0.00138217
NFKBIA	https://www.ensembl.org/id/ENSG00000100906	112.975	97.9627	89.4058	202.123	185.309	200.659	119.594	119.384	91.1293	202.886	189.95	184.927	0.000529597	0.00392658	0.448281	0.673463
MTCH1	https://www.ensembl.org/id/ENSG00000137409	146.836	154.008	141.145	139.29	125.863	133.814	150.581	153.887	155.451	164.058	159.041	162.528	0.0564514	0.0142966	0.244996	0.0100113
SPRR1B	https://www.ensembl.org/id/ENSG00000169469	38.6963	41.0902	34.9832	416.604	424.082	417.867	47.6655	55.4982	39.5621	90.5576	86.9607	86.8428	5.27056e-08	0.00895265	0.169866	9.48701e-07
U2AF1L5	https://www.ensembl.org/id/ENSG00000275895	178.73	198.375	173.842	127.939	154.216	142.104	144.566	147.82	130.282	124.922	125.72	129.949	0.0167172	0.111675	0.0123059	0.191239
TIMM17A	https://www.ensembl.org/id/ENSG00000134375	145.17	146.51	136.325	158.803	163.944	170.472	135.998	139.731	133.283	144.334	152.517	142.814	0.00954418	0.0557619	0.179321	0.0173151
MRPS26	https://www.ensembl.org/id/ENSG00000125901	165.756	161.816	157.61	171.65	168.829	165.533	136.882	132.853	124.266	126.668	130.977	124.475	0.082693	0.413795	0.0041966	9.59012e-05
PICALM	https://www.ensembl.org/id/ENSG00000073921	142.152	137.529	141.299	132.621	122.458	141.466	156.275	156.13	152.832	157.073	161.265	164.103	0.273578	0.0878448	0.00153488	0.0238272
ARFGAP3	https://www.ensembl.org/id/ENSG00000242247	128.085	127.653	147.364	145.238	134.006	147.591	138.075	134.855	141.095	174.973	174.682	171.38	0.373211	0.000220994	0.636952	0.0125655
GSTO1	https://www.ensembl.org/id/ENSG00000148834	161.179	152.721	135.442	143.915	149.68	142.386	148.456	148.817	144.924	145.164	149.767	142.307	0.621993	0.553623	0.784344	0.899301
MFSD10	https://www.ensembl.org/id/ENSG00000109736	143.3	153.715	159.201	163.495	146.112	156.332	150.031	150.635	172.945	121.849	121.483	120.439	0.661776	0.0395077	0.555375	0.0206286
VDAC3	https://www.ensembl.org/id/ENSG00000078668	173.303	189.734	142.937	150.385	134.403	145.223	151.066	155.047	138.135	130.914	125.48	121.32	0.198446	0.0300715	0.269255	0.0446808
USH1C	https://www.ensembl.org/id/ENSG00000006611	135.938	127.911	122.127	188.061	188.453	191.07	128.494	129.417	124.613	136.169	142.84	139.486	0.00293762	0.00922416	0.807913	0.000215914
SYT13	https://www.ensembl.org/id/ENSG00000019505	143.87	141.951	119.03	139.509	134.703	150.434	160.394	157.133	148.662	148.927	150.661	157.548	0.523357	0.531142	0.108822	0.131288
SRRM2	https://www.ensembl.org/id/ENSG00000167978	138.468	150.683	120.674	116.554	89.0444	129.551	177.401	167.311	157.544	187.963	152.209	164.284	0.174078	0.954875	0.0501091	0.0244655
SSNA1	https://www.ensembl.org/id/ENSG00000176101	158.454	139.03	140.366	151.245	156.584	146.656	144.494	146.117	142.135	145.07	139.076	141.278	0.483517	0.318444	0.813015	0.0563844
SDHD	https://www.ensembl.org/id/ENSG00000204370	147.931	145.176	146.294	132.334	135.903	137.341	145.91	144.331	142.757	155.358	161.461	155.616	0.00639972	0.011256	0.154156	0.00121775
PABPN1	https://www.ensembl.org/id/ENSG00000100836	166.253	202.883	167.68	150.026	114.296	137.948	147.581	142.168	118.826	150.15	130.982	121.037	0.0489694	0.870436	0.0501058	0.998155
UBXN6	https://www.ensembl.org/id/ENSG00000167671	134.191	130.009	143.042	161.077	159.65	151.41	134.362	127.079	146.344	149.579	156.919	153.917	0.0129227	0.0744016	0.980226	0.355459
PSMA3	https://www.ensembl.org/id/ENSG00000100567	161.715	162.913	128.364	149.574	148.236	149.672	146.651	146.813	120.619	144.248	149.528	138.013	0.886082	0.5783	0.41831	0.255266
MRPL3	https://www.ensembl.org/id/ENSG00000114686	174.003	162.144	141.222	132.934	128.134	126.721	145.672	144.987	132.483	148.292	162.72	143.896	0.084256	0.216408	0.191124	0.0474761
RNPEP	https://www.ensembl.org/id/ENSG00000176393	144.045	141.044	117.761	207.32	200.631	204.844	118.26	118.922	119.696	119.484	125.444	124.754	0.0105845	0.145878	0.206093	7.56383e-06
SLC16A3	https://www.ensembl.org/id/ENSG00000141526	176.498	170.515	165.918	121.995	123.076	115.221	158.245	163.141	161.337	122.022	130.079	132.824	0.000268498	0.00382157	0.0630556	0.118829
PLCD3	https://www.ensembl.org/id/ENSG00000161714	123.993	122.631	111.946	215.454	210.944	218.463	126.31	128.429	124.131	115.612	117.92	123.978	0.000142262	0.0854426	0.211123	9.99743e-06
ARL2	https://www.ensembl.org/id/ENSG00000213465	153.967	145.629	141.379	166.805	179.717	163.842	113.711	120.544	122.36	138.796	146.612	145.941	0.0220446	0.00238773	0.00479677	0.017323
SRP72	https://www.ensembl.org/id/ENSG00000174780	141.224	139.597	136.335	139.559	130.977	145.831	145.011	147.826	139.46	153.318	159.245	159.253	0.958164	0.0153249	0.16798	0.0336629
CMTM6	https://www.ensembl.org/id/ENSG00000091317	152.373	153.757	135.795	182.954	183.28	194.199	118.325	120.54	109.725	126.597	130.844	126.366	0.00726599	0.0534715	0.0161557	0.00137525
UBE2D3	https://www.ensembl.org/id/ENSG00000109332	145.953	146.638	137.389	138.074	131.954	145.687	145.011	147.246	144.044	149.503	152.299	149.368	0.396253	0.0211549	0.559053	0.0895009
COPA	https://www.ensembl.org/id/ENSG00000122218	116.305	107.661	100.21	137.444	132.214	156.428	137.203	136.946	135.014	187.668	185.326	199.568	0.0240259	0.00554598	0.0238531	0.00844921
SUCLG1	https://www.ensembl.org/id/ENSG00000163541	144.928	143.735	123.475	133.978	141.45	139.161	144.411	145.056	125.921	165.941	164.407	158.852	0.919611	0.047188	0.913638	0.00129066
GSN	https://www.ensembl.org/id/ENSG00000148180	145.595	137.033	135.219	189.916	192.222	188.721	127.946	130.337	129.775	112.054	121.92	119.872	0.0018968	0.0560065	0.0834586	0.000633916
EIF6	https://www.ensembl.org/id/ENSG00000242372	159.964	152.853	134.137	187.737	198.066	181.237	122.659	122.388	120.601	111.035	119.973	117.916	0.0169707	0.169464	0.0711459	0.000814991
STARD10	https://www.ensembl.org/id/ENSG00000214530	152.658	147.851	146.326	139.113	141.421	140.919	137.246	141.627	143.291	139.656	148.55	147.923	0.0348979	0.253511	0.0352416	0.225799
LLGL2	https://www.ensembl.org/id/ENSG00000073350	141.735	161.235	132.69	154.8	123.363	145.263	153.068	156.322	138.081	149.813	129.431	138.804	0.761711	0.294768	0.719931	0.879944
RASSF7	https://www.ensembl.org/id/ENSG00000099849	152.094	212.169	163.436	130.057	96.2603	109.225	163.8	171.797	142.051	148.296	119.07	115.863	0.0534427	0.0833809	0.47674	0.327588
EIF3B	https://www.ensembl.org/id/ENSG00000106263	176.507	171.226	131.424	127.438	126.553	137.006	157.223	158.058	141.321	130.006	134.431	132.693	0.169288	0.0609489	0.660678	0.614387
MYO1D	https://www.ensembl.org/id/ENSG00000176658	130.132	121.718	106.604	138.283	133.212	154.87	152.881	156.253	160.038	150.46	153.219	165.151	0.0758117	0.983175	0.0251572	0.158355
ACSL5	https://www.ensembl.org/id/ENSG00000197142	156.444	158.463	127.703	134.002	131.678	144.21	159.215	154.24	137.892	136.361	138.234	141.627	0.391967	0.206041	0.819715	0.650306
GABARAPL2	https://www.ensembl.org/id/ENSG00000034713	129.9	132.197	139.045	176.405	179.525	187	125.6	119.997	121.43	138.571	139.583	130.543	0.000382406	0.0213888	0.03292	0.000481912
YWHAH	https://www.ensembl.org/id/ENSG00000128245	184.74	175.312	173.331	108.806	114.645	113.324	142.801	142.898	154.643	135.957	141.57	131.641	0.00052135	0.106117	0.00434743	0.00397439
PDAP1	https://www.ensembl.org/id/ENSG00000106244	165.154	170.15	145.409	152.991	145.32	148.12	140.918	139.407	119.504	128.782	133.967	129.121	0.266191	0.74112	0.0583434	0.0037602
KPNB1	https://www.ensembl.org/id/ENSG00000108424	161.783	165.366	135.625	111.04	102.457	113.824	164.957	160.164	150.227	147.718	153.843	151.529	0.0289686	0.223244	0.713717	0.00163228
MAZ	https://www.ensembl.org/id/ENSG00000103495	174.981	167.513	154.417	113.473	112.261	107.715	148.457	143.403	144.188	145.106	154.142	151.542	0.0078474	0.206053	0.0693129	0.000593796
CTDNEP1	https://www.ensembl.org/id/ENSG00000175826	146.155	142.036	153.42	125.773	124.165	122.748	142.787	140.999	156.359	146.66	156.657	158.318	0.0154349	0.307642	0.938314	0.011273
HMGN4	https://www.ensembl.org/id/ENSG00000182952	154.231	156.213	140.278	118.99	114.063	120.515	145.45	149.334	136.836	159.271	162.512	157.583	0.0138011	0.0361225	0.369043	0.000114405
NDUFV2	https://www.ensembl.org/id/ENSG00000178127	141.559	141.942	135.829	148.075	149.702	150.677	139.376	137.515	133.199	145.306	148.081	141.13	0.0269002	0.0409339	0.316959	0.135999
PRNP	https://www.ensembl.org/id/ENSG00000171867	145.007	145.832	137.362	115.087	115.392	122.895	151.183	154.373	163.991	150.804	155.667	152.048	0.0025856	0.447692	0.0489323	0.000958109
RAMP1	https://www.ensembl.org/id/ENSG00000132329	152.801	149.762	143.65	200.749	214.267	184.169	112.975	108.09	106.594	106.533	117.263	108.051	0.0203403	0.740639	0.000485889	0.00440981
SSR3	https://www.ensembl.org/id/ENSG00000114850	126.567	126.751	136.294	146.449	145.017	156.818	129.043	126.051	126.353	160.356	161.838	162.679	0.0170785	1.91233e-05	0.490677	0.0772151
WSB2	https://www.ensembl.org/id/ENSG00000176871	142.743	132.08	135.767	143.228	145.891	143.825	136.047	141.596	153.443	139.252	144.687	144.607	0.132447	0.887988	0.331115	0.515048
MAPK3	https://www.ensembl.org/id/ENSG00000102882	132.409	121.994	140.246	127.133	128.153	123.703	141.863	138.476	161.284	158.502	161.895	167.138	0.429534	0.153642	0.1577	0.000953203
CSNK1A1	https://www.ensembl.org/id/ENSG00000113712	133.5	133.655	126.009	129.696	118.112	136.576	152.595	152.135	141.949	160.17	161.009	155.346	0.658267	0.0846519	0.0171533	0.0209259
UQCR11	https://www.ensembl.org/id/ENSG00000127540	146.709	146.098	138.738	160.533	167.661	157.964	122.473	122.109	127.989	137.535	137.215	135.045	0.00962574	0.0128085	0.00456501	0.00893547
RAB5C	https://www.ensembl.org/id/ENSG00000108774	137.006	129.827	113.82	176.189	178.17	181.434	122.299	125.164	114.596	137.247	144.882	139.363	0.0137387	0.00901658	0.475208	0.000346874
RTN3	https://www.ensembl.org/id/ENSG00000133318	157.443	154.867	150.239	111.126	112.107	114.148	160.275	159.208	157.024	133.475	143.36	140.823	0.000673521	0.0150057	0.14478	0.00774069
LMO7	https://www.ensembl.org/id/ENSG00000136153	102.681	111.147	104.408	137.061	107.848	146.554	160.525	160.589	161.32	173.634	159.648	165.891	0.165864	0.301573	0.00204095	0.0780789
CEACAM5	https://www.ensembl.org/id/ENSG00000105388	140.079	123.179	128.094	172.494	166.203	199.942	109.168	109.819	122.043	134.304	138.307	147.457	0.0254732	0.0100939	0.0641776	0.0484525
POLD4	https://www.ensembl.org/id/ENSG00000175482	124.685	132.411	130.427	159.782	159.277	153.622	128.538	123.692	134.066	147.96	149.463	147.054	0.000827241	0.0186835	0.919545	0.030162
PKN1	https://www.ensembl.org/id/ENSG00000123143	129.639	120.904	127.893	127.422	126.931	128.147	141.45	145.921	150.016	159.693	166.386	166.531	0.66324	0.00546399	0.00578571	0.0031258
MRPL14	https://www.ensembl.org/id/ENSG00000180992	154.488	149.066	155.888	159.668	169.331	155.793	120.49	123.237	122.07	123.386	127.862	128.369	0.159152	0.0817774	0.00168815	0.0064665
TSTD1	https://www.ensembl.org/id/ENSG00000215845	154.549	150.409	148.524	142.825	145.284	142.802	136.071	134.375	137.097	134.329	135.069	126.662	0.034811	0.288115	0.00570833	0.0398928
PNP	https://www.ensembl.org/id/ENSG00000198805	134.515	125.84	122.181	156.402	153.587	159.554	131.558	132.988	150.791	137.256	141.469	140.53	0.00663276	0.854	0.218768	0.00200896
ETFA	https://www.ensembl.org/id/ENSG00000140374	151.712	152.209	135.857	150.044	145.589	147.946	120.157	122.469	120.625	145.347	148.387	142.978	0.837916	0.00110488	0.0395447	0.324041
METTL26	https://www.ensembl.org/id/ENSG00000130731	151.494	144.874	147.937	147.934	141.464	133.141	133.215	132.787	145.455	131.903	128.273	142.885	0.226958	0.667541	0.102117	0.349597
QARS1	https://www.ensembl.org/id/ENSG00000172053	143.889	136.26	125.499	106.717	106.78	111.071	153.324	158.107	162.896	151.425	165.251	157.212	0.0297852	0.977639	0.0317486	0.00298736
VASP	https://www.ensembl.org/id/ENSG00000125753	138.857	131.02	136.198	101.362	97.3532	101.454	145.544	144.345	159.75	171.426	173.819	176.258	0.000632309	0.0322791	0.0812251	2.89912e-06
JPT1	https://www.ensembl.org/id/ENSG00000189159	165.077	158.028	153.835	123.827	135.15	120.647	139.954	142.645	151.487	121.942	131.254	127.93	0.00523672	0.0181346	0.0407019	0.928523
CXCL1	https://www.ensembl.org/id/ENSG00000163739	83.9344	90.3026	53.2935	271.24	202.638	257.321	101.411	102.532	51.7623	163.64	154.396	133.791	0.00532127	0.0401368	0.670174	0.0323105
IFNGR2	https://www.ensembl.org/id/ENSG00000159128	122.363	115.641	133.711	110.138	104.122	107.908	145.581	145.639	158.753	170.202	176.68	173.337	0.0763339	0.0204564	0.0202077	1.40183e-05
CBX3	https://www.ensembl.org/id/ENSG00000122565	169.569	173.035	149.78	102.756	96.1467	109.329	158.768	160.198	141.934	134.416	135.178	128.059	0.00476258	0.0547887	0.325638	0.00515158
CHMP5	https://www.ensembl.org/id/ENSG00000086065	128.755	124.238	135.891	166.113	152.858	170.798	114.128	117.29	115.357	150.837	142.988	139.634	0.00969854	0.00893136	0.0455365	0.051659
PSMD10	https://www.ensembl.org/id/ENSG00000101843	127.198	126.284	133.721	156.586	154.882	157.198	130.139	128.196	135.083	132.901	136.954	137.464	0.00439891	0.146403	0.542636	0.00127603
ODC1	https://www.ensembl.org/id/ENSG00000115758	157.755	146.312	124.369	127.914	125.928	127.975	132.029	134.426	129.469	148.719	155.699	145.762	0.253187	0.0128523	0.383869	0.012904
COX6C	https://www.ensembl.org/id/ENSG00000164919	141.562	142.551	129.797	150.028	155.981	142.826	126.427	123.87	124.894	132.006	147.262	138.402	0.106089	0.0814174	0.0832411	0.151141
GORASP2	https://www.ensembl.org/id/ENSG00000115806	120.09	113.434	122.604	134.28	128.497	141.334	132.517	127.337	148.594	154	164.054	166.154	0.0292998	0.0378344	0.0963587	0.00718429
PPP2CB	https://www.ensembl.org/id/ENSG00000104695	127.293	116.888	125.996	183.144	175.161	189.704	119.687	111.413	124.342	124.524	128.798	125.272	0.00050717	0.168573	0.382724	0.00293801
HNRNPUL1	https://www.ensembl.org/id/ENSG00000105323	154.239	144.986	130.391	102.099	99.1262	104.862	160.923	159.862	158.281	143.973	143.992	148.47	0.0223273	0.0035412	0.139204	4.43355e-05
U2AF2	https://www.ensembl.org/id/ENSG00000063244	150.064	158.073	128.549	118.634	101.423	118.137	161.827	162.601	139.728	145.02	133.604	132.786	0.0436193	0.128763	0.474157	0.0289332
B4GALT1	https://www.ensembl.org/id/ENSG00000086062	115.866	112.408	112.238	141.777	140.043	150.864	126.716	128.104	131.616	153.446	163.735	171.697	0.00645534	0.0173816	0.00146869	0.0496941
FA2H	https://www.ensembl.org/id/ENSG00000103089	92.167	81.583	103.345	223.485	216.398	219.096	89.14	89.349	97.4306	140.733	143.662	151.336	0.00103043	0.00024653	0.958315	0.000115633
CLDN3	https://www.ensembl.org/id/ENSG00000165215	169.733	150.689	147.582	99.4271	97.9578	92.6669	146.404	141.832	155.011	140.486	152.028	153.558	0.00882068	0.875827	0.371497	0.00165495
PLK2	https://www.ensembl.org/id/ENSG00000145632	147.585	142.67	116.383	285.703	214.369	295.007	93.0571	93.5646	62.277	71.3379	66.5124	57.3394	0.0249474	0.219199	0.0208112	0.0140367
ALDH18A1	https://www.ensembl.org/id/ENSG00000059573	154.659	152.221	148.346	104.172	97.0493	113.126	132.937	129.466	133.885	156.879	156.072	165.074	0.00441643	0.00412417	0.00145808	0.00134828
PON2	https://www.ensembl.org/id/ENSG00000105854	139.425	153.792	118.158	140.215	130.522	146.927	128.463	136.066	117.647	146.315	143.784	141.881	0.866514	0.082541	0.464805	0.424043
AHCYL1	https://www.ensembl.org/id/ENSG00000168710	125.905	128.886	110.007	141.878	126.154	148.74	133.628	133.392	129.582	149.778	154.087	156.874	0.124341	0.00193596	0.207969	0.150589
SSRP1	https://www.ensembl.org/id/ENSG00000149136	175.187	176.967	134.644	100.767	100.107	102.362	157.146	153.687	141.833	127.993	135.365	129.594	0.0471184	0.0328221	0.503598	0.00313417
MZT2A	https://www.ensembl.org/id/ENSG00000173272	151.457	144.794	154.539	115.404	120.091	117.757	146.727	137.684	157.334	125.975	136.999	125.888	0.00249701	0.0698368	0.668479	0.0705294
CCT5	https://www.ensembl.org/id/ENSG00000150753	174.471	165.942	127.837	130.216	135.552	137.311	142.522	144.958	121.643	113.645	120.42	119.922	0.267583	0.121431	0.309208	0.00583389
C11orf98	https://www.ensembl.org/id/ENSG00000278615	154.549	155.821	117.867	166.232	176.669	159.56	115.639	118.515	103.513	115.861	128.147	121.451	0.175113	0.190473	0.123445	0.00253583
DEPP1	https://www.ensembl.org/id/ENSG00000165507	159.181	164.975	134.413	172.888	191.565	188.068	137.665	142.355	110.873	78.5652	80.299	72.6663	0.0578958	0.0271563	0.171785	0.000871781
AP2B1	https://www.ensembl.org/id/ENSG00000006125	139.338	134.36	104.581	116.044	115.582	125.904	145.121	146.41	138.177	152.395	157.377	156.54	0.595736	0.0222343	0.251782	0.00299358
ARL6IP4	https://www.ensembl.org/id/ENSG00000182196	142.125	148.749	136.921	153.05	151.12	148.288	121.938	113.684	123.066	131.15	135.417	125.094	0.124519	0.0593435	0.0074184	0.0104087
IDH2	https://www.ensembl.org/id/ENSG00000182054	175.805	169.536	149.319	125.15	132.189	126.083	133.392	130.833	127.572	115.656	127.002	117.987	0.0356235	0.0767097	0.0450569	0.150584
HIGD1A	https://www.ensembl.org/id/ENSG00000181061	132.39	127.749	115.579	185.612	195.362	204.396	114.288	107.937	96.1987	113.941	118.985	114.625	0.000716659	0.201969	0.0590852	0.00261656
SRXN1	https://www.ensembl.org/id/ENSG00000271303	128.832	116.098	120.997	133.701	127.752	132.847	129.173	133.002	131.386	157.473	154.614	160.812	0.108591	0.00063275	0.121218	0.000533056
TJP3	https://www.ensembl.org/id/ENSG00000105289	115.876	121.04	118.905	124.319	110.114	130.309	136.825	136.811	135.12	165.527	159.361	172.019	0.672854	0.0134899	0.00317888	0.00605985
DYNLRB1	https://www.ensembl.org/id/ENSG00000125971	140.265	133.8	141.624	137.295	139.702	129.352	135.893	136.816	138.7	120.882	137.647	131.246	0.477332	0.276363	0.622692	0.403443
SNRPC	https://www.ensembl.org/id/ENSG00000124562	149.239	141.748	133.932	154.933	161.516	148.94	123.794	124.56	129.556	118.997	118.494	115.734	0.0802364	0.0261301	0.0553361	0.00607836
FLOT1	https://www.ensembl.org/id/ENSG00000137312	130.282	118.791	124.278	106.009	101.499	97.6821	139.707	129.888	149.586	171.293	174.265	177.944	0.00676484	0.0174472	0.0970385	2.80934e-05
HADHA	https://www.ensembl.org/id/ENSG00000084754	130.945	122.161	115.364	121.604	126.471	131.725	140.535	142.729	147.522	140.786	150.097	150.887	0.526968	0.403632	0.0283452	0.00933503
RIOK3	https://www.ensembl.org/id/ENSG00000101782	129.277	134.841	133.033	133.988	114.309	140.086	145.458	142.893	147.17	140.026	129.328	128.967	0.745799	0.063302	0.00428408	0.726656
VAMP3	https://www.ensembl.org/id/ENSG00000049245	138.874	134.415	126.773	127.03	130.049	132.537	143.777	144.604	142.38	127.06	135.963	134.646	0.439846	0.0513061	0.0968631	0.459564
FIS1	https://www.ensembl.org/id/ENSG00000214253	142.878	138.071	127.745	147.271	145.688	137.222	119.79	120.551	132.293	134.227	140.642	130.896	0.266416	0.0972557	0.117476	0.127347
PLOD1	https://www.ensembl.org/id/ENSG00000083444	132.999	123.427	106.73	73.5608	76.5472	80.1286	170.622	169.687	165.649	163.635	174.164	179.58	0.0233334	0.507795	0.021594	0.000677244
MRPS35	https://www.ensembl.org/id/ENSG00000061794	153.36	153.178	133.895	113.387	109.71	117.278	137.299	140.482	129.643	140.202	144.15	142.9	0.025736	0.166301	0.226631	0.00123823
RTCB	https://www.ensembl.org/id/ENSG00000100220	119.879	116.922	117.504	153.844	164.421	157.294	114.579	110.397	122.191	140.462	148.298	145.882	0.00345373	0.00353944	0.56625	0.0279818
ATP5IF1	https://www.ensembl.org/id/ENSG00000130770	139.387	142.346	139.629	149.658	141.583	139.184	127.302	125.098	121.042	134.971	126.161	125.157	0.444591	0.316049	0.00449431	0.0296625
SYF2	https://www.ensembl.org/id/ENSG00000117614	114.013	119.838	132.48	145.881	139.226	143.923	131.302	120.444	128.952	145.021	144.529	144.74	0.0485884	0.0322288	0.502368	0.468459
TES	https://www.ensembl.org/id/ENSG00000135269	130.722	130.854	128.902	101.631	96.3828	109.351	165.973	161.829	155.719	135.785	150.096	143.037	0.0158984	0.0273121	0.00706452	0.00198732
TSC22D3	https://www.ensembl.org/id/ENSG00000157514	104.738	107.276	144.086	105.343	98.039	104.413	117.138	114.666	146.32	195.421	182.282	190.468	0.332223	0.0154221	0.676415	0.000171012
FAT1	https://www.ensembl.org/id/ENSG00000083857	155.637	148.47	121.823	137.367	128.193	166.021	148.657	135.924	127.16	109.428	114.426	115.878	0.908318	0.0507742	0.718298	0.111102
OSBP	https://www.ensembl.org/id/ENSG00000110048	116.252	116.663	117.918	115.143	105.034	121.277	141.399	135.183	146.4	161.853	162.852	167.004	0.577595	0.00878294	0.0159368	0.00484287
AHSA1	https://www.ensembl.org/id/ENSG00000100591	154.963	150.138	133.166	125.889	126.949	131.203	129.54	130.528	123.009	131.963	137.052	131.72	0.10427	0.121135	0.0952952	0.0797297
CALB2	https://www.ensembl.org/id/ENSG00000172137	144.339	136.945	136.609	92.693	95.0625	92.9747	145.408	148.433	153.001	155.556	157.138	145.587	0.00155506	0.428706	0.0460004	0.00270378
RAB6A	https://www.ensembl.org/id/ENSG00000175582	134.901	131.28	126.817	105.622	96.4672	115.151	144.564	142.617	131.122	152.672	160.393	160.872	0.0280927	0.0271839	0.173308	0.00357566
RAB13	https://www.ensembl.org/id/ENSG00000143545	139.706	144.602	145.905	117.261	108.351	107.585	141.771	134.051	137.428	138.511	149.921	137.235	0.00203838	0.433111	0.12731	0.00459226
UBQLN1	https://www.ensembl.org/id/ENSG00000135018	138.505	136.508	115.438	132.429	122.382	139.242	132.149	137.674	113.461	145.932	144.517	142.361	0.89965	0.150466	0.829548	0.112885
CSNK2B	https://www.ensembl.org/id/ENSG00000204435	132.643	132.532	131.247	142.842	144.638	138.636	127.818	133.555	136.473	125.012	124.971	129.616	0.0250487	0.125087	0.870165	0.00294837
LRRC59	https://www.ensembl.org/id/ENSG00000108829	126.007	118.803	113.294	139.487	143.738	149.584	112.22	113.641	128.778	147.272	148.097	157.448	0.00700458	0.0102801	0.867616	0.203626
SLC9A3R2	https://www.ensembl.org/id/ENSG00000065054	113.245	108.132	121.391	173.86	172.383	165.63	108.565	107.684	113.386	132.603	142.73	137.291	0.000582251	0.00278596	0.38322	0.00112456
EHD1	https://www.ensembl.org/id/ENSG00000110047	107.658	101.885	109.129	140.096	138.024	135.193	123.293	124.484	137.752	152.739	160.528	164.909	0.000655769	0.0073449	0.0247738	0.0156775
ACSL3	https://www.ensembl.org/id/ENSG00000123983	129.397	130.099	120.152	96.3551	90.8613	104.018	149.715	152.409	146.456	158.302	158.138	159.411	0.00448517	0.0287645	0.00752151	0.00351952
TXN2	https://www.ensembl.org/id/ENSG00000100348	149.056	138.423	136.567	141.211	145.036	147.973	117.247	123.992	123.462	119.327	129.412	121.679	0.4938	0.63971	0.0193818	0.00680957
PYCR1	https://www.ensembl.org/id/ENSG00000183010	126.616	112.783	143.477	100.931	96.6436	94.6512	117.128	113.786	148.757	171.199	180.456	184.083	0.0708295	0.0320408	0.943995	0.000399742
IMMT	https://www.ensembl.org/id/ENSG00000132305	145.365	143.086	116.545	117.913	113.293	124.635	137.461	141.483	129.76	139.181	144.779	136.068	0.21166	0.431583	0.909573	0.00800387
TAF1D	https://www.ensembl.org/id/ENSG00000166012	120.789	134.948	144.799	115.002	88.4029	112.683	146.53	147.04	145.256	155.483	140.742	136.243	0.0650015	0.750722	0.207872	0.0245904
ANAPC16	https://www.ensembl.org/id/ENSG00000166295	133.443	139.495	141.409	139.117	137.966	139.81	129.457	122.959	120.984	129.664	130.68	122.745	0.760294	0.417191	0.0178334	0.0403789
MAF1	https://www.ensembl.org/id/ENSG00000179632	141.971	125.499	145.452	132.279	135.567	128.141	125.674	121.305	133.577	130.972	133.736	133.045	0.462023	0.248368	0.221091	0.817141
CSRP1	https://www.ensembl.org/id/ENSG00000159176	139.375	136.288	118.307	150.526	151.096	150.116	122.537	123.749	113.959	123.43	126.914	129.111	0.0990568	0.16256	0.224061	0.0038037
ROMO1	https://www.ensembl.org/id/ENSG00000125995	158.007	149.654	144.56	138.647	152.776	116.683	130.065	122.148	127.824	108.106	124.883	111.719	0.295263	0.132809	0.010666	0.171302
TPD52L2	https://www.ensembl.org/id/ENSG00000101150	138.54	140.161	132.069	131.055	117.948	126.557	137.022	140.077	133.061	132.183	131.755	123.423	0.072696	0.103008	0.952543	0.46096
RETSAT	https://www.ensembl.org/id/ENSG00000042445	120.361	116.408	120.713	170.942	164.938	178.015	118.586	115.792	128.15	115.515	117.281	116.185	0.0022476	0.350561	0.706354	0.00411802
PDHB	https://www.ensembl.org/id/ENSG00000168291	152.207	147.571	140.314	108.272	109.121	102.57	146.958	139.645	132.353	131.345	137.571	134.824	0.00151482	0.357176	0.268502	0.00056498
AUP1	https://www.ensembl.org/id/ENSG00000115307	130.854	150.852	125.191	152.768	125.422	141.836	126.348	131.913	115.923	130.829	122.552	121.955	0.714111	0.948284	0.309474	0.193584
DYNLL1	https://www.ensembl.org/id/ENSG00000088986	157.736	149.647	128.738	138.276	139.946	132.952	137.395	136.157	119.761	110.464	114.539	108.767	0.439339	0.0626901	0.250107	0.000835008
YWHAB	https://www.ensembl.org/id/ENSG00000166913	160.231	158.242	120.299	132.29	130.991	134.673	130.693	132.032	109.59	117.143	125.422	121.106	0.404934	0.736905	0.229537	0.0260546
WBP1	https://www.ensembl.org/id/ENSG00000239779	113.996	127.173	126.77	150.05	148.161	146.213	125.243	123.389	128.707	126.389	128.541	127.007	0.0220214	0.437765	0.553143	0.000346256
PSMB8	https://www.ensembl.org/id/ENSG00000204264	129.328	126.177	115.065	155.812	157.497	161.039	119.484	117.719	109.316	122.931	130.376	126.766	0.00886776	0.0492675	0.214578	0.000493365
UBE2V1	https://www.ensembl.org/id/ENSG00000244687	151.071	151.892	129.085	131.061	128.931	133.571	139.051	145.576	120.559	108.416	117.227	112.494	0.225426	0.0838191	0.445022	0.00742399
ALKBH7	https://www.ensembl.org/id/ENSG00000125652	119.959	112.036	123.332	109.378	117.994	109.044	126.145	124.154	147.322	156.224	159.437	161.115	0.230602	0.0657812	0.188564	0.000865215
TARS1	https://www.ensembl.org/id/ENSG00000113407	127.119	122.012	127.622	97.2089	94.1366	98.4419	138.88	135.943	151.959	151.367	157.568	162.962	0.000346097	0.0733156	0.0633981	0.00104572
KDELR3	https://www.ensembl.org/id/ENSG00000100196	125.093	110.802	141.862	106.826	111.77	106.357	113.453	111.235	136.251	159.45	169.624	171.979	0.185164	0.0148092	0.665512	0.0011836
PLD3	https://www.ensembl.org/id/ENSG00000105223	116.868	111.679	119.873	126.037	125.958	126.51	130.904	137.6	149.714	133.308	141.93	142.53	0.0518251	0.982368	0.0359288	0.0476762
RAD21	https://www.ensembl.org/id/ENSG00000164754	149.663	143.758	137.306	73.3201	68.7663	81.3313	157.249	153.906	167.867	140.96	144.117	141.679	0.000175363	0.0476409	0.0447689	0.00172792
GJB2	https://www.ensembl.org/id/ENSG00000165474	85.6475	87.8491	92.3734	230.007	252.654	235.681	84.8359	84.2622	86.6427	104.306	108.471	104.459	0.000995652	0.000875237	0.224166	0.00185953
IARS2	https://www.ensembl.org/id/ENSG00000067704	153.082	148.931	121.376	108.006	98.4034	110.955	142.544	145.901	124.359	129.8	138.211	132.996	0.0564466	0.62607	0.785147	0.0057318
TXNRD1	https://www.ensembl.org/id/ENSG00000198431	132.478	125.49	109.938	108.711	97.2691	113.161	139.022	137.243	133.264	150.321	148.628	157.546	0.125173	0.0128441	0.166209	0.00278432
EBNA1BP2	https://www.ensembl.org/id/ENSG00000117395	162.853	168.609	121.15	175.503	161.238	167.103	122.02	126.321	92.5975	84.1649	89.3146	81.6082	0.37261	0.108245	0.119754	0.000330516
CHMP2B	https://www.ensembl.org/id/ENSG00000083937	148.792	145.818	111.909	120.011	113.936	124.176	144.168	146.802	111.991	127.457	132.224	124.848	0.304285	0.6405	0.945442	0.0808787
DPYSL2	https://www.ensembl.org/id/ENSG00000092964	138.616	143.339	139.017	99.7566	100.642	111.83	146.151	155.742	145.281	124.125	120.675	126.888	0.00550639	0.0065904	0.104798	0.021743
LYPLA2	https://www.ensembl.org/id/ENSG00000011009	132.147	125.552	120.059	166.964	166.185	162.658	117.661	116.765	103.307	109.755	116.617	113.119	0.00354357	0.915689	0.0883718	7.34944e-05
NDUFA13	https://www.ensembl.org/id/ENSG00000186010	128	128.653	117.697	166.005	180.101	154.832	108.247	102.223	107.437	119.525	120.272	115.639	0.0151779	0.00748141	0.0177732	0.018845
CDK2AP2	https://www.ensembl.org/id/ENSG00000167797	118.832	120.005	119.331	146.484	156.845	140.972	117.039	109.166	119.379	128.779	133.661	137.847	0.0247589	0.0114821	0.306915	0.0670781
ADIPOR1	https://www.ensembl.org/id/ENSG00000159346	118.066	107.122	124.464	133.521	134.809	140.67	120.675	119.023	136.827	134.88	136.548	140.498	0.0433041	0.165436	0.305136	0.742758
PABPC4	https://www.ensembl.org/id/ENSG00000090621	129.189	130.545	118.198	110.246	103.201	109.55	149.48	152.14	138.452	134.705	137.301	132.908	0.0239465	0.0970304	0.0226534	0.00140057
FHL2	https://www.ensembl.org/id/ENSG00000115641	132.365	123.571	133.101	179.21	183.485	179.999	103.861	105.312	108.385	95.1912	101.29	99.4615	0.00102185	0.0367404	0.00766583	7.8876e-06
MRPS15	https://www.ensembl.org/id/ENSG00000116898	146.32	136.463	113.864	117.565	117.124	116.231	120.995	120.726	122.075	145.135	149.149	138.853	0.253369	0.015019	0.372453	0.0107275
OAT	https://www.ensembl.org/id/ENSG00000065154	130.669	128.277	130.478	91.9653	89.9003	98.0302	133.909	128.698	135.934	155.697	165.407	155.386	0.0022645	0.00451165	0.292309	0.00015263
CD59	https://www.ensembl.org/id/ENSG00000085063	134.356	131.84	138.889	99.7865	91.9813	101.147	146.45	144.114	150.854	134.685	135.148	134.075	0.000721089	0.0218809	0.0133131	0.00545853
MIEN1	https://www.ensembl.org/id/ENSG00000141741	118.392	124.172	123.162	179.962	178.943	172.036	100.489	94.1371	98.4426	115.506	118.598	114.897	0.000112483	0.00232407	0.000731032	0.000307053
MAP2K3	https://www.ensembl.org/id/ENSG00000034152	129.341	123.64	116.499	128.926	127.545	128.448	119.038	128.377	122.979	135.595	140.53	136.119	0.299703	0.0182413	0.950593	0.022514
UQCRQ	https://www.ensembl.org/id/ENSG00000164405	130.125	127.243	114.294	150.144	151.691	147.318	107.288	107.832	111.894	126.176	132.433	125.608	0.0272734	0.00321404	0.0819839	0.00253669
HMGB1	https://www.ensembl.org/id/ENSG00000189403	172.976	177.487	142.786	96.4059	94.858	99.5307	146.087	143.397	128.188	110.155	111.413	108.712	0.0235996	0.0325814	0.132256	0.00294973
KLF6	https://www.ensembl.org/id/ENSG00000067082	109.196	102.025	131.653	73.0813	62.0196	71.7403	142.446	137.799	171.13	181.751	172.982	175.692	0.0245696	0.119865	0.0592322	3.0193e-05
FBXW5	https://www.ensembl.org/id/ENSG00000159069	132.104	131.675	120.966	150.028	134.352	142.425	120.77	127.37	115.196	118.419	120.167	117.404	0.0762337	0.561606	0.231696	0.0315237
EIF3H	https://www.ensembl.org/id/ENSG00000147677	130.643	126.608	124.697	132.005	134.22	136.236	126.949	122.189	126.288	119.356	127.194	123.004	0.0385955	0.515944	0.399237	0.0225514
CALU	https://www.ensembl.org/id/ENSG00000128595	102.29	101.345	123.652	105.775	99.2491	108.954	121.488	117.151	142.967	164.986	166.297	174.702	0.615912	0.0236611	0.169686	0.000108407
PSAT1	https://www.ensembl.org/id/ENSG00000135069	118.036	112.324	157.458	106.932	106.561	105.057	117.518	112.892	158.814	139.531	146.536	147.192	0.245072	0.421072	0.982738	0.00276063
DDX47	https://www.ensembl.org/id/ENSG00000213782	143.892	141.74	127.538	129.411	125.161	134.673	125.292	130.539	117.627	114.25	119.706	117.71	0.26249	0.182696	0.112029	0.025773
TOMM22	https://www.ensembl.org/id/ENSG00000100216	146.677	136.776	125.151	119.343	129.449	126.912	123.443	123.773	118.403	123.138	128.3	125.926	0.21432	0.164215	0.139508	0.88079
TPRG1L	https://www.ensembl.org/id/ENSG00000158109	138.593	120.765	122.505	127.803	129.58	126.134	124.779	122.65	124.963	123.032	136.775	129.241	0.932055	0.295783	0.634995	0.69231
PTBP3	https://www.ensembl.org/id/ENSG00000119314	113.854	117.819	112.292	130.393	122.251	144.539	120.68	121.269	110.163	142.51	143.458	145.165	0.104621	0.0149506	0.545859	0.223069
DEFB1	https://www.ensembl.org/id/ENSG00000164825	78.615	79.2289	66.482	227.625	265.196	250.293	79.7432	89.6855	70.9475	108.617	105.658	100.518	0.0014903	0.0294512	0.479414	0.00427347
MUC1	https://www.ensembl.org/id/ENSG00000185499	176.942	174.323	140.593	75.7135	72.5423	83.2537	129.802	139.532	104.197	139.163	137.336	143.345	0.0129521	0.279087	0.0671325	0.000323265
EIF5	https://www.ensembl.org/id/ENSG00000100664	150.479	151.899	108.693	129.167	121.241	137.729	134.799	141.076	96.1661	117.715	116.477	110.579	0.651595	0.585231	0.549879	0.0754939
RAB14	https://www.ensembl.org/id/ENSG00000119396	124.461	121.47	120.917	121.355	126.318	128.282	121.836	121.729	129.313	127.116	136.418	135.445	0.283259	0.0898278	0.521065	0.108173
ITPRID2	https://www.ensembl.org/id/ENSG00000138434	120.222	132.979	118.315	111.471	86.0686	119.37	137.684	137.346	128.981	148.363	132.461	137.537	0.204363	0.442076	0.129916	0.0597232
ADH5	https://www.ensembl.org/id/ENSG00000197894	132.428	129.311	111.954	145.761	151.023	147.876	123.524	118.892	109.461	111.189	116.879	112.302	0.0584193	0.462255	0.400811	0.000128117
CRYZ	https://www.ensembl.org/id/ENSG00000116791	131.811	139.462	121.353	100.808	91.7486	100.049	137.332	142.259	112.328	148.118	147.877	134.341	0.010356	0.305362	0.983662	0.00210151
TMEM147	https://www.ensembl.org/id/ENSG00000105677	136.221	122.967	113.683	133.859	140.576	136.242	114.288	111.503	110.721	123.876	131.746	130.133	0.18664	0.0103639	0.202396	0.057631
GTF3A	https://www.ensembl.org/id/ENSG00000122034	159.849	147.404	125.075	120.592	122.563	123.162	122.671	124.235	107.754	112.893	119.056	119.918	0.162282	0.881759	0.10892	0.150825
CIRBP	https://www.ensembl.org/id/ENSG00000099622	129.718	145.131	132.489	128.509	113.52	120.465	136.605	134.147	130.215	117.649	110.315	103.331	0.0810543	0.0173215	0.708881	0.157538
CDC34	https://www.ensembl.org/id/ENSG00000099804	137.096	131.698	150.716	119.696	120.589	112.749	118.746	123.749	133.043	110.298	121.56	120.905	0.0429243	0.244799	0.111702	0.984794
DAZAP1	https://www.ensembl.org/id/ENSG00000071626	153.124	162.077	128.031	111.132	101.872	110.903	131.526	130.039	115.369	122.925	120.085	113.62	0.049921	0.32934	0.149618	0.0572975
TRIM31	https://www.ensembl.org/id/ENSG00000204616	134.968	179.6	133.873	116.954	80.045	109.701	126.834	133.359	104.526	150.544	113.479	115.645	0.0709591	0.755551	0.201411	0.214361
SUMF2	https://www.ensembl.org/id/ENSG00000129103	140.972	142.302	125.649	118.102	113.615	114.262	132.683	132.103	126.668	116.77	117.269	117.252	0.0511949	0.0192563	0.39361	0.332964
NIPSNAP2	https://www.ensembl.org/id/ENSG00000146729	131.768	128.766	134.12	104.797	99.8268	105.599	135.523	135.197	134.938	126.813	129.304	127.773	0.000332096	0.00731139	0.139945	0.00200095
CENPB	https://www.ensembl.org/id/ENSG00000125817	153.345	148.009	117.371	134.28	131.619	130.04	128.141	125.39	105.074	102.169	107.556	106.622	0.568555	0.187541	0.219434	0.000339319
UBE2S	https://www.ensembl.org/id/ENSG00000108106	150.968	144.188	155.766	48.7594	52.6539	49.5591	137.366	133.921	176.464	142.528	148.555	148.09	0.000350303	0.854186	0.946189	1.19157e-05
PHLDA3	https://www.ensembl.org/id/ENSG00000174307	97.5136	97.7543	85.5607	315.839	310.609	298.31	44.9446	46.5333	38.4021	48.3187	53.0711	48.9226	9.26668e-06	0.093251	0.00109702	0.000155108
TM9SF3	https://www.ensembl.org/id/ENSG00000077147	123.91	128.805	119.322	94.6805	88.1191	100.429	132.634	137.286	122.95	143.941	147.798	145.648	0.00340973	0.0638777	0.250758	0.00246719
RNASE4	https://www.ensembl.org/id/ENSG00000258818	116.061	102.406	138.519	78.3123	76.7615	78.8113	152.045	139.561	172.557	140.621	139.036	149.401	0.0594922	0.348988	0.0668925	0.00180664
DDT	https://www.ensembl.org/id/ENSG00000099977	154.34	142.875	138.276	106.774	115.28	106.011	120.596	134.816	128.629	109.829	107.964	115.914	0.00560392	0.0347615	0.0542407	0.64924
DUSP4	https://www.ensembl.org/id/ENSG00000120875	102.4	98.8226	90.6951	213.71	197.284	213.562	93.8652	92.8194	85.2003	95.0415	98.8556	98.8402	0.000205417	0.109614	0.208323	0.00155115
YAP1	https://www.ensembl.org/id/ENSG00000137693	112.674	120.479	108.5	145.849	136.232	161.132	128.875	125.131	109.515	110.183	110.646	111.479	0.0264779	0.220972	0.362333	0.0360588
PSMB5	https://www.ensembl.org/id/ENSG00000100804	127.277	115.179	121.226	117.536	131.876	117.258	117.581	119.795	126.515	121.968	135.361	127.137	0.876062	0.229698	0.988167	0.395452
RAB11A	https://www.ensembl.org/id/ENSG00000103769	124.731	122.176	115.571	130.316	129.535	133.398	116.578	112.352	111.035	126.655	131.28	124.714	0.0475177	0.00553706	0.0924755	0.210507
YIPF3	https://www.ensembl.org/id/ENSG00000137207	117.311	111.372	113.616	127.083	128.954	125.325	121.949	122.541	127.803	120.354	129.577	131.318	0.00570887	0.495759	0.0172147	0.992478
UBE2H	https://www.ensembl.org/id/ENSG00000186591	97.5278	99.3818	110.775	142.307	131.202	145.912	115.561	114.283	124.624	130.087	130.211	134.377	0.00360999	0.0383187	0.0444502	0.196265
ADD3	https://www.ensembl.org/id/ENSG00000148700	129.028	147.772	113.65	95.3572	74.61	100.14	151.364	157.532	118.644	136.407	124.788	126.525	0.0358409	0.387944	0.473703	0.022867
NDUFA7	https://www.ensembl.org/id/ENSG00000267855	114.326	118.369	130.012	126.212	132.866	130.44	115.431	108.405	109.39	127.895	131.049	130.522	0.188674	0.00586622	0.160007	0.994012
SNRNP70	https://www.ensembl.org/id/ENSG00000104852	141.59	153.507	138.14	108.504	98.8568	101.728	130.897	130.255	127.158	123.689	109.321	110.855	0.00331908	0.0749552	0.0768342	0.110316
ADRM1	https://www.ensembl.org/id/ENSG00000130706	112.996	102.412	101.316	163.836	174.277	159.281	106.873	105.945	112.323	111.44	112.441	111.316	0.000563345	0.231621	0.553035	0.00640298
DGUOK	https://www.ensembl.org/id/ENSG00000114956	122.02	122.057	134.108	124.541	116.084	118.503	115.363	111.92	123.682	132.675	131.362	121.932	0.264065	0.074423	0.16512	0.106805
CDC42EP5	https://www.ensembl.org/id/ENSG00000167617	146.416	138.644	138.498	118.931	102.211	106.6	113.741	112.003	103.117	124.161	138.081	130.891	0.0107826	0.0157424	0.00204405	0.0293913
EIF1B	https://www.ensembl.org/id/ENSG00000114784	113.054	112.416	121.438	128.735	126.646	129.511	119.09	115.654	124.119	127.433	126.073	126.154	0.0398331	0.101755	0.355793	0.16775
RAB7A	https://www.ensembl.org/id/ENSG00000075785	116.819	117.305	116.465	135.94	129.52	138.263	114.948	116.007	118.275	119.264	123.58	123.573	0.0203586	0.0362685	0.693516	0.0234615
GRN	https://www.ensembl.org/id/ENSG00000030582	132.424	113.982	120	113.921	113.817	106.275	147.766	150.087	151.613	105.431	104.476	109.109	0.174768	2.672e-05	0.0319764	0.17914
NDUFA4	https://www.ensembl.org/id/ENSG00000189043	114.627	113.394	105.429	152.827	153.48	154.432	96.162	105.275	92.141	135.022	120.435	124.647	0.00380988	0.00797378	0.056328	0.0239452
MATR3_1	https://www.ensembl.org/id/ENSG00000280987	130.213	132.358	116.531	106.363	94.0532	115.614	137.697	137.724	130.082	123.479	120.37	120.13	0.0608303	0.0196387	0.212762	0.120799
MAFF	https://www.ensembl.org/id/ENSG00000185022	88.7797	84.0399	89.9389	161.378	146.144	158.909	102.659	105.436	103.888	141.231	143.246	135.244	0.00188379	0.00209718	0.00493825	0.0612626
B3GNT3	https://www.ensembl.org/id/ENSG00000179913	97.3372	91.7491	85.0428	135.288	138.755	135.315	107.102	104.722	99.2491	147.025	155.492	160.036	0.00323806	0.000934368	0.052841	0.0342595
CYCS	https://www.ensembl.org/id/ENSG00000172115	116.719	113.457	102.687	117.434	124.112	125.978	114.761	112.042	111.995	138.987	140.23	138.527	0.0943488	0.000102122	0.689598	0.0199601
RPS29	https://www.ensembl.org/id/ENSG00000213741	132.009	124.943	135.955	99.9878	108.26	93.4452	134.726	126.844	149.31	115.61	118.039	117.015	0.00595448	0.0911347	0.475224	0.0590264
BIRC3	https://www.ensembl.org/id/ENSG00000023445	69.1544	77.9949	57.4423	144.837	115.803	159.653	120.294	126.024	72.6376	183.391	166.25	162.282	0.0172409	0.0485199	0.142002	0.125829
BRD2	https://www.ensembl.org/id/ENSG00000204256	120.215	116.8	115.787	105.817	88.7628	109.054	129.078	127.927	137.4	135.781	127.603	137.091	0.115474	0.655906	0.0280372	0.0211536
SERINC3	https://www.ensembl.org/id/ENSG00000132824	104.748	106.532	119.174	120.44	113.359	125.93	122.72	121.683	127.53	129.217	131.051	127.957	0.172201	0.0756652	0.0776433	0.113324
LTBR	https://www.ensembl.org/id/ENSG00000111321	110.079	104.038	101.248	128.909	123.01	128.701	114.678	115.779	114.423	134.9	135.066	138.438	0.00342546	0.00112118	0.0602146	0.0220738
DDX21	https://www.ensembl.org/id/ENSG00000165732	127.9	126.975	104.844	125.643	115.984	139.809	116.336	119.883	100.299	122.31	124.952	123.968	0.518493	0.193015	0.469757	0.672345
CLIP2	https://www.ensembl.org/id/ENSG00000106665	99.2996	94.5208	91.1765	115.235	99.4262	119.837	126.194	126.729	127.191	147.634	143.071	154.725	0.102288	0.0227401	0.00495518	0.0123857
CDC123	https://www.ensembl.org/id/ENSG00000151465	151.862	144.321	125.194	114.367	116.478	112.252	122.665	123.273	102.095	106.472	110.76	115.065	0.0781302	0.538193	0.0826242	0.286175
ERG28	https://www.ensembl.org/id/ENSG00000133935	145.465	142.968	138.699	82.5564	80.5146	77.869	123.671	121.336	137.796	125.241	134.104	133.41	3.62268e-05	0.610481	0.0881356	0.000679333
ABRACL	https://www.ensembl.org/id/ENSG00000146386	124.456	115.222	110.126	116.981	123.836	118.77	110.252	113.878	110.988	130.808	139.14	127.964	0.536726	0.0169199	0.363849	0.041208
GNG10	https://www.ensembl.org/id/ENSG00000242616	124.575	135.662	114.171	123.255	111.862	122.577	126.62	126.503	109.102	112.569	124.592	110.301	0.492425	0.540547	0.65812	0.587156
RBX1	https://www.ensembl.org/id/ENSG00000100387	134.794	133.574	137.461	116.925	123.782	108.062	117.671	117.085	118.606	111.962	113.041	107.441	0.0455331	0.0478987	0.0016	0.357174
EPRS1	https://www.ensembl.org/id/ENSG00000136628	107.129	98.4791	89.8049	82.1612	76.721	87.6116	124.993	127.478	129.939	165.29	172.31	178.309	0.0615961	0.00312547	0.0216983	6.54903e-05
ARRDC1	https://www.ensembl.org/id/ENSG00000197070	110.874	122.933	108.843	154.277	140.16	148.801	108.389	112.445	99.6818	116.96	107.121	109.683	0.0051558	0.410758	0.273004	0.00282123
ANXA11	https://www.ensembl.org/id/ENSG00000122359	125.392	124.576	106.091	134.905	137.293	136.812	114.596	119.437	102.875	109.655	114.471	113.849	0.105441	0.950235	0.47169	0.000949938
PROCR	https://www.ensembl.org/id/ENSG00000101000	93.5927	87.1483	87.5813	187.185	185.991	182.534	103.473	105.415	106.823	96.9849	101.26	99.4646	1.035e-05	0.0209482	0.00754026	1.53898e-06
ACBD3	https://www.ensembl.org/id/ENSG00000182827	93.3814	89.5221	116.76	102.013	95.1385	108.487	107.489	99.7264	137.349	164.289	159.215	162.665	0.845813	0.0520766	0.358344	0.00148715
CETN2	https://www.ensembl.org/id/ENSG00000147400	139.788	136.648	142.395	86.4347	94.365	93.8155	131.099	127.305	127.523	114.929	120.399	120.941	0.000252359	0.017402	0.00760143	0.00144559
IK	https://www.ensembl.org/id/ENSG00000113141	112.86	114.12	103.023	112.076	109.556	111.265	129.009	129.66	119.439	126.231	132.683	134.557	0.811324	0.28972	0.0293295	0.0103419
GRINA	https://www.ensembl.org/id/ENSG00000178719	121.31	112.689	114.171	131.92	126.271	125.66	114.477	120.108	118.532	113.729	112.198	122.63	0.0263882	0.705955	0.632692	0.0472386
EI24	https://www.ensembl.org/id/ENSG00000149547	105.168	109.657	85.3989	208.747	216.122	215.347	86.4642	86.0551	73.3954	77.0844	86.8773	81.8962	0.00218359	0.997263	0.120371	5.08826e-06
SPTSSA	https://www.ensembl.org/id/ENSG00000165389	114.982	120.584	103.95	145.076	154.234	157.071	105.326	107.272	97.1281	109.424	112.879	104.149	0.00401235	0.239724	0.174256	0.00102979
LRRC42	https://www.ensembl.org/id/ENSG00000116212	127.724	124.289	130.569	123.463	117.653	126.847	120.199	118.208	119.667	105.237	108.507	109.017	0.216672	0.00321185	0.035579	0.017651
IGFL2	https://www.ensembl.org/id/ENSG00000204866	81.7699	84.8991	85.037	359.573	371.734	356.044	24.5105	19.1722	21.8953	7.68118	9.46868	8.07269	0.000155433	0.00725529	1.46672e-05	0.000150911
LYPLA1	https://www.ensembl.org/id/ENSG00000120992	115.04	120.567	104.805	139.442	144.162	153.553	103.478	108.8	93.0605	112.004	115.627	118.656	0.0067404	0.0819634	0.148039	0.00844879
SPCS2	https://www.ensembl.org/id/ENSG00000118363	124.151	125.044	122.666	124.484	125.422	121.436	119.152	117.751	107.054	107.832	123.156	110.252	0.908275	0.889481	0.131116	0.162882
ABCD3	https://www.ensembl.org/id/ENSG00000117528	117.325	116.029	90.3431	166.275	165.515	180.751	94.9343	101.524	82.9269	100.054	108.653	103.967	0.00713406	0.167331	0.239488	0.00135293
CXCL8	https://www.ensembl.org/id/ENSG00000169429	85.8728	75.7845	61.4319	154.134	140.597	164.425	113.496	113.349	76.1977	154.754	146.808	141.133	0.00135803	0.0532219	0.153827	0.537077
HK2	https://www.ensembl.org/id/ENSG00000159399	145.165	149.14	121.645	80.1839	79.8415	94.9369	149.29	147.207	115.998	113.226	120.077	110.803	0.0103827	0.16173	0.93753	0.0122684
FKBP4	https://www.ensembl.org/id/ENSG00000004478	137.723	130.64	106.107	126.689	129.736	126.933	112.502	116.729	102.543	107.586	115.15	113.697	0.786879	0.76689	0.274666	0.0114658
LSS	https://www.ensembl.org/id/ENSG00000160285	125.044	150.042	103.21	96.3544	77.8402	88.8826	141.009	148.465	101.43	138.7	123.981	129.766	0.0897675	0.975696	0.843132	0.00387682
CBR1	https://www.ensembl.org/id/ENSG00000159228	140.875	127.588	115.358	114.006	114.089	111.311	118.28	114.235	108.272	119.814	121.86	116.35	0.180507	0.178644	0.181477	0.040445
NDUFA6	https://www.ensembl.org/id/ENSG00000184983	129.8	120.844	118.611	119.106	117.571	116.86	108.638	107.945	118.324	120.039	120.525	123.759	0.26297	0.0866197	0.0750373	0.0708722
TRAPPC6A	https://www.ensembl.org/id/ENSG00000007255	145.48	148.822	151.177	95.8315	103.241	95.4054	129.273	128.473	127.844	94.2734	102.342	98.4134	0.000212343	0.00480038	0.00461694	0.960162
GPC1	https://www.ensembl.org/id/ENSG00000063660	73.2824	64.3828	61.1839	299.646	297.84	297.789	54.2928	57.1231	55.5423	51.2622	53.8679	53.8178	0.000168302	0.0879995	0.0924117	1.15225e-08
SQOR	https://www.ensembl.org/id/ENSG00000137767	108.861	100.246	90.285	128.227	133.955	131.235	112.28	118.28	102.347	128.728	134.407	131.169	0.0205236	0.0360436	0.192086	0.905252
TMEM59	https://www.ensembl.org/id/ENSG00000116209	119.101	116.861	125.717	110.589	109.209	115.097	129.7	127.606	135.321	108.401	112.792	109.51	0.0574717	0.00357266	0.0437658	0.564842
RHOF	https://www.ensembl.org/id/ENSG00000139725	105.831	102.619	115.622	93.0374	89.3986	94.9198	125.227	122.045	152.03	134.884	141.58	141.694	0.0422737	0.580126	0.1036	0.000137442
ILK	https://www.ensembl.org/id/ENSG00000166333	113.88	115.221	109.205	121.222	117.855	124.232	120.052	125.092	127.363	111.794	113.051	119.606	0.0324149	0.0456286	0.0165889	0.112671
C12orf75	https://www.ensembl.org/id/ENSG00000235162	132.035	131.351	127.841	76.8731	86.8033	86.9618	138.767	135.299	129.581	124.093	126.025	120.372	0.00194169	0.0331254	0.261701	0.00192116
NPM3	https://www.ensembl.org/id/ENSG00000107833	152.613	143.918	132.023	95.4578	96.2221	91.1717	124.661	117.514	121.898	110.588	120.965	108.896	0.0107263	0.161685	0.0563861	0.0234893
KIAA1191	https://www.ensembl.org/id/ENSG00000122203	120.209	115.241	105.565	117.014	111.291	123.053	127.708	125.058	116.623	115.944	119.518	117.66	0.565017	0.241588	0.161778	0.881555
EPS8L2	https://www.ensembl.org/id/ENSG00000177106	93.6928	122.388	91.3051	178.897	131.411	164.784	106.346	118.427	91.1004	127.511	92.9375	94.6722	0.0368282	0.986403	0.835642	0.0441347
PNMA1	https://www.ensembl.org/id/ENSG00000176903	134.345	133.253	127.537	106.114	101.378	104.607	132.67	129.636	122.792	105.778	107.553	105.772	0.000824879	0.0143145	0.410632	0.231401
ATRAID	https://www.ensembl.org/id/ENSG00000138085	130.753	115.428	112.839	121.265	121.959	121.781	108.186	111.484	103.425	114.861	126.445	122.652	0.75536	0.0360411	0.153464	0.927871
EIF2AK1	https://www.ensembl.org/id/ENSG00000086232	119.12	123.595	114.629	99.5138	88.5638	99.6715	121.486	124.904	114.429	135.447	135.76	132.855	0.00893243	0.0340527	0.788249	0.00623941
ERLEC1	https://www.ensembl.org/id/ENSG00000068912	93.4329	93.8796	97.4797	142.885	126.556	146.644	93.502	93.6722	92.255	144.282	142.464	142.912	0.0160732	3.86835e-07	0.296139	0.539846
TMEM50A	https://www.ensembl.org/id/ENSG00000183726	117.708	116.215	116.58	107.243	108.398	101.679	123.978	119.97	123.308	121.111	127.124	123.339	0.0287838	0.543477	0.0338832	0.00291088
AKR1A1	https://www.ensembl.org/id/ENSG00000117448	104.781	102.209	103.742	157.422	157.248	151.67	93.2601	95.7853	95.0835	114.21	117.423	113.679	0.000332589	0.000333431	0.00111788	0.000188033
MOB1A	https://www.ensembl.org/id/ENSG00000114978	121.978	128.069	106.493	118.43	106.121	129.759	119.305	122.966	99.2215	118.882	121.507	113.593	0.940641	0.636509	0.635702	0.989034
ARL4C	https://www.ensembl.org/id/ENSG00000188042	131.554	131.904	103.002	177.7	171.371	180.553	105.653	107.213	81.7593	70.3102	76.0901	68.536	0.022797	0.0749433	0.132486	1.01281e-05
LSM2	https://www.ensembl.org/id/ENSG00000204392	130.051	129.146	120.418	109.7	119.591	106.241	104.28	108.137	106.627	122.315	125.225	123.871	0.0470741	0.000369332	0.013902	0.0902113
OLA1	https://www.ensembl.org/id/ENSG00000138430	122.642	117.994	114.502	113.652	114.62	116.408	122.339	120.194	120.122	108.487	118.889	114.903	0.274509	0.147851	0.401797	0.819758
SGPP2	https://www.ensembl.org/id/ENSG00000163082	97.5292	94.6592	93.6488	94.3807	89.465	98.1163	135.722	130.192	136.623	141.075	146.521	145.149	0.673687	0.0191715	0.000315324	0.000199945
DVL1	https://www.ensembl.org/id/ENSG00000107404	108.338	128.406	99.8529	100.694	68.3862	87.0325	127.565	129.117	115.456	160.459	138.748	138.34	0.101432	0.0763064	0.30167	0.00817448
CD2AP	https://www.ensembl.org/id/ENSG00000198087	99.5216	107.685	95.6896	122.087	99.8791	133.675	118.362	118.672	101.169	139.649	133.02	132.561	0.211306	0.0461793	0.172253	0.233831
GTF2I	https://www.ensembl.org/id/ENSG00000263001	122.723	136.458	97.8633	128.048	104.133	131.676	121.385	128.013	95.4083	118.923	109.061	107.684	0.881346	0.795229	0.799997	0.397027
ATP6AP2	https://www.ensembl.org/id/ENSG00000182220	108.207	107.16	104.313	146.009	154.733	153.745	100.84	99.868	101.205	105.531	108.449	110.798	0.00113607	0.0309505	0.0264132	0.000686126
SCAMP2	https://www.ensembl.org/id/ENSG00000140497	102.2	98.9639	101.802	140.916	141.237	141.119	102.377	103.496	109.151	117.527	119.452	121.961	0.000587397	0.00709729	0.186442	0.00342291
HMGCL	https://www.ensembl.org/id/ENSG00000117305	116.092	109.553	108.153	124.336	127.757	119.71	117.837	123.189	115.657	109.647	117.727	109.999	0.0200531	0.138073	0.0833888	0.0317326
TBCA	https://www.ensembl.org/id/ENSG00000171530	116.834	114.827	119.462	104.412	104.586	99.4859	122.277	122.09	125.314	121.721	126.075	122.552	0.00315133	0.902152	0.0243427	0.000815677
POLR2E	https://www.ensembl.org/id/ENSG00000099817	128.009	128.626	118.933	111.395	112.66	106.699	123.116	114.805	117.498	107.985	116.561	113.237	0.0226994	0.167995	0.170641	0.493726
SMIM30	https://www.ensembl.org/id/ENSG00000214194	132.129	127.766	125.319	109.252	115.13	116.633	127.445	121.582	108.019	106.68	107.248	101.224	0.00834896	0.124771	0.239221	0.0448704
IGFBP2	https://www.ensembl.org/id/ENSG00000115457	201.827	189.669	176.049	33.6052	33.5462	33.7256	153.075	154.862	157.493	82.447	94.5456	87.0107	0.00228212	0.00101181	0.0412004	0.00417527
KRTCAP3	https://www.ensembl.org/id/ENSG00000157992	127.824	124.469	116.03	107.469	106.062	99.1388	124.219	121.537	120.112	116.704	119.182	114.012	0.0156429	0.0525729	0.842423	0.0219934
MAP2K1	https://www.ensembl.org/id/ENSG00000169032	118.783	124.299	112.572	105.773	108.523	110.029	113.158	118.204	112.357	118.713	124.697	129.637	0.0770386	0.0699775	0.375807	0.0237213
NET1	https://www.ensembl.org/id/ENSG00000173848	119.498	122.195	104.185	115.246	114.209	125.548	121.28	120.286	111.462	110.625	120.366	111.724	0.676005	0.476884	0.734133	0.438524
BLVRB	https://www.ensembl.org/id/ENSG00000090013	118.937	107.867	108.292	102.25	108.135	99.1881	115.487	115.489	125.244	127.987	128.309	136.177	0.136794	0.0475363	0.222309	0.00181043
SMIM29	https://www.ensembl.org/id/ENSG00000186577	99.4909	94.0511	102.746	117.294	111.406	106.766	106.772	107.728	121.953	140.618	137.304	146.285	0.0315603	0.0128087	0.0939889	0.00197686
DNAJC8	https://www.ensembl.org/id/ENSG00000126698	135.877	131.825	119.513	120.249	119.341	117.488	116.791	115.889	103.098	102.227	109.65	100.434	0.174929	0.222268	0.0612468	0.026431
ARL1	https://www.ensembl.org/id/ENSG00000120805	97.143	98.6803	103.077	111.991	110.576	123.581	105.754	105.827	102.357	143.707	142.606	146.553	0.0456765	1.75341e-05	0.0879121	0.0142122
S100A13	https://www.ensembl.org/id/ENSG00000189171	128.938	142.025	116.707	104.014	91.0398	93.3343	114.599	108.142	117.001	129.917	127.636	117.549	0.026877	0.0710137	0.149481	0.00638236
EIF3E	https://www.ensembl.org/id/ENSG00000104408	117.165	117.183	121.093	87.7094	90.0979	94.4744	136.013	136.65	135.271	116.427	120.119	117.718	0.000665248	0.00140764	0.00304994	0.00104156
PGLS	https://www.ensembl.org/id/ENSG00000130313	110.777	101.635	101.952	123.658	129.155	123.154	104.103	112.139	113.987	121.59	124.142	123.416	0.00722538	0.0435485	0.282643	0.362329
ZFP36	https://www.ensembl.org/id/ENSG00000128016	109.961	94.701	87.8431	126.892	113.401	121.489	103.423	104.16	99.5055	153.541	135.912	138.523	0.0503159	0.0134987	0.537344	0.0356738
PSMD6	https://www.ensembl.org/id/ENSG00000163636	126.973	125.305	103.212	120.438	121.99	130.9	116.615	118.604	102.457	110.179	107.789	104.631	0.531684	0.430838	0.558391	0.0199038
NPTN	https://www.ensembl.org/id/ENSG00000156642	120.809	128.416	128.398	89.5683	79.0129	91.4696	136.532	134.248	130.962	115.722	117.701	115.651	0.00200757	0.00340821	0.065954	0.0145
LIMA1	https://www.ensembl.org/id/ENSG00000050405	115.598	113.65	105.629	126.694	116.429	137.488	107.059	108.193	96.5549	119.351	121.326	119.089	0.112439	0.0454031	0.186951	0.371394
FAM32A	https://www.ensembl.org/id/ENSG00000105058	130.867	130.025	121.419	126.014	126.08	128.781	111.748	108.237	96.2555	99.6271	107.811	98.8262	0.891362	0.58424	0.0227807	0.00813151
NOLC1	https://www.ensembl.org/id/ENSG00000166197	147.83	149.51	111.989	90.4585	84.3808	95.7807	138.576	138.861	108.352	104.703	109.73	102.838	0.0549823	0.147824	0.648001	0.0226127
DHPS	https://www.ensembl.org/id/ENSG00000095059	119.895	120.764	124.8	107.176	104.98	107.312	114.459	118.474	120.797	114.883	114.927	114.468	0.00305626	0.230298	0.179962	0.00662529
C6orf62	https://www.ensembl.org/id/ENSG00000112308	128.345	130.632	107.292	132.443	125.631	137.622	112.551	110.489	85.134	104.051	104.813	99.3236	0.322011	0.999668	0.170344	0.00530715
TRAP1	https://www.ensembl.org/id/ENSG00000126602	125.915	119.975	97.8008	105.128	102.997	104.776	118.317	119.733	111.757	122.001	122.783	121.563	0.352997	0.151353	0.837396	0.000136841
NDUFS6	https://www.ensembl.org/id/ENSG00000145494	115.914	113.317	97.346	154.72	171.214	142.543	85.9665	88.6159	83.5815	105.649	106.425	107.185	0.0124375	0.00274615	0.0517361	0.0264981
DYNC1LI2	https://www.ensembl.org/id/ENSG00000135720	99.7429	107.419	101.157	102.744	91.1254	111.709	121.991	122.478	111.249	140.331	131.945	129.482	0.896925	0.0361361	0.0291063	0.0166521
MINK1	https://www.ensembl.org/id/ENSG00000141503	99.5644	106.139	89.2713	115.418	92.9453	118.227	125.951	129.577	117.598	134.161	116.278	125.084	0.336129	0.9054	0.0154568	0.173872
CENPX	https://www.ensembl.org/id/ENSG00000169689	185.833	187.244	158.426	75.3656	69.3674	66.9432	132.878	133.777	112.974	87.1187	80.0597	78.6248	0.00503891	0.0132824	0.0146574	0.0350857
ADGRE5	https://www.ensembl.org/id/ENSG00000123146	131.753	117.266	119.326	49.9925	50.3275	50.1057	144.504	149.058	169.165	122.11	132.206	131.609	0.00384432	0.0605792	0.0328384	0.0017167
TMEM97	https://www.ensembl.org/id/ENSG00000109084	160.664	171.713	138.724	39.5873	41.6666	42.8208	157.036	157.368	172.729	93.0174	94.1072	97.1495	0.0065444	0.0040171	0.659523	8.11842e-06
NDUFAB1	https://www.ensembl.org/id/ENSG00000004779	122.407	122.826	112.375	114.529	119.495	109.47	104.727	111.019	103.004	115.576	117.186	113.478	0.354136	0.0470417	0.0419786	0.789301
FDXR	https://www.ensembl.org/id/ENSG00000161513	45.049	43.4446	40.399	373.094	400.141	371.212	16.6725	17.2416	17.951	13.771	15.059	11.9237	0.000606637	0.0405142	0.00158037	0.000580537
SARNP	https://www.ensembl.org/id/ENSG00000205323	126.863	124.905	123.248	103.948	103.329	103.858	120.382	116.323	115.546	107.757	113.625	105.92	0.00180598	0.0484835	0.0179522	0.145258
GDI1	https://www.ensembl.org/id/ENSG00000203879	95.082	99.8147	103.65	129.342	127.299	124.788	101.611	107.583	109.957	126.525	118.423	121.39	0.00208703	0.0101939	0.12182	0.156423
TMEM30A	https://www.ensembl.org/id/ENSG00000112697	102.475	102.922	101.197	150.066	138.832	162.179	94.8309	92.477	88.0513	110.828	111.057	110.3	0.0185519	0.010105	0.028141	0.0276244
EMC6	https://www.ensembl.org/id/ENSG00000127774	120.863	109.822	120.584	125.062	130.387	118.952	108.046	105.35	104.877	105.521	110.045	105.619	0.192166	0.620175	0.0850682	0.0194053
TRAF7	https://www.ensembl.org/id/ENSG00000131653	99.5659	93.8078	89.0898	116.79	111.925	120.521	104.461	102.479	108.906	136.57	136.039	143.415	0.0053068	0.000501663	0.0452862	0.0029597
NDFIP1	https://www.ensembl.org/id/ENSG00000131507	107.603	108.771	104.321	118.673	119.806	119.303	109.44	111.106	101.342	117.158	124.205	120.529	0.00836144	0.0269431	0.912262	0.571788
DARS1	https://www.ensembl.org/id/ENSG00000115866	129.009	133.669	113.979	73.3798	65.9987	78.5544	144.002	143.524	123.691	115.654	124.924	115.286	0.00330843	0.0927231	0.268311	0.000742931
HSPA4	https://www.ensembl.org/id/ENSG00000170606	111.051	110.44	89.3598	116.243	117.478	127.522	117.796	115.295	100.379	114.312	122.558	116.293	0.127545	0.357517	0.450878	0.573209
SRSF3	https://www.ensembl.org/id/ENSG00000112081	159.288	151.094	119.432	87.4611	81.8827	89.9654	132.304	127.925	106.216	100.785	103.953	96.4417	0.0384676	0.105665	0.231345	0.0126991
ACTR1B	https://www.ensembl.org/id/ENSG00000115073	113.261	122.494	100.427	121.548	110.074	124.417	111.981	113.444	99.726	121.478	107.054	109.443	0.447287	0.530466	0.662544	0.390243
GSR	https://www.ensembl.org/id/ENSG00000104687	118.938	112.128	104.65	118.226	116.968	122.89	106.962	107.579	102.674	112.317	117.646	114.131	0.204979	0.0151207	0.270864	0.123684
NEK6	https://www.ensembl.org/id/ENSG00000119408	117.76	108.782	97.8774	56.4604	52.0268	60.8067	150.888	155.498	139.129	136.087	140.881	138.481	0.00514994	0.168585	0.00631458	7.59204e-05
PSMD7	https://www.ensembl.org/id/ENSG00000103035	119.573	121.979	112.496	114.549	117.893	115.883	106.349	109.981	107.645	104.177	110.966	110.781	0.579906	0.810513	0.0578845	0.0618366
TST	https://www.ensembl.org/id/ENSG00000128311	136.252	134.055	112.814	124.967	130.397	121.47	100.433	101.407	94.775	93.6571	102.123	99.7938	0.811601	0.920584	0.0523122	0.00171496
NSDHL	https://www.ensembl.org/id/ENSG00000147383	109.482	109.774	103.686	78.3965	89.2048	83.5063	121.732	121.02	146.804	122.738	126.436	137.993	0.00510645	0.939259	0.113305	0.00207392
AARS1	https://www.ensembl.org/id/ENSG00000090861	102.255	95.7053	107.833	74.9972	72.4414	75.6146	120.364	118.29	144.633	144.662	141.991	150.271	0.0112011	0.160902	0.0763521	0.000277929
SUCLG2	https://www.ensembl.org/id/ENSG00000172340	113.941	110.515	110.13	90.832	89.1459	96.4904	117.11	121.497	121.853	119.657	131.708	125.862	0.00415191	0.245796	0.012796	0.00241879
XPNPEP1	https://www.ensembl.org/id/ENSG00000108039	117.32	119.733	102.342	119.006	108.648	123.612	106.115	112.079	96.5611	116.945	111.901	114.314	0.603864	0.162131	0.31209	0.611274
ATG101	https://www.ensembl.org/id/ENSG00000123395	107.837	100.498	136.314	104.8	103.648	99.9173	105.817	99.4796	129.804	116.527	118.499	125.422	0.383534	0.460648	0.835116	0.0100775
SNU13	https://www.ensembl.org/id/ENSG00000100138	128.531	122.356	114.347	95.8786	104.056	98.2752	115.192	121.034	119.298	104.346	113.005	109.891	0.0153999	0.043806	0.52572	0.0509915
VIL1	https://www.ensembl.org/id/ENSG00000127831	138.986	138.14	101.683	98.6426	92.591	106.512	114.598	117.317	97.3029	111.852	111.629	116.551	0.149234	0.627671	0.317702	0.0575437
BAIAP2L1	https://www.ensembl.org/id/ENSG00000006453	92.3848	113.853	109.808	120.461	97.1804	113.145	112.45	114.136	115.608	128.38	114.049	113.794	0.633006	0.435254	0.316071	0.375743
ATP6V1G1	https://www.ensembl.org/id/ENSG00000136888	98.9153	96.0084	117.348	120.048	122.316	121.209	99.4458	101.701	104.115	121.352	123.681	117.621	0.123391	0.00133955	0.762226	0.882897
JUN	https://www.ensembl.org/id/ENSG00000177606	134.489	100.089	92.7168	121.181	93.2534	111.499	117.964	111.14	97.6575	143.182	116.581	103.174	0.977928	0.428536	0.990851	0.443218
MYEOV	https://www.ensembl.org/id/ENSG00000172927	138.15	138.281	120.133	121.482	108.937	121.08	108.009	117.904	113.122	88.566	85.0522	81.5794	0.117904	0.00205238	0.0676601	0.00661485
HNRNPM	https://www.ensembl.org/id/ENSG00000099783	167.349	176.938	109.242	91.8633	90.3514	89.8624	136.484	139.821	104.083	79.0483	79.5783	77.156	0.103489	0.0510721	0.383345	0.000274147
CDV3	https://www.ensembl.org/id/ENSG00000091527	118.247	113.001	111.463	90.7446	80.3501	90.038	125.716	125.141	118.616	122.313	124.962	120.244	0.00445443	0.820688	0.0442554	0.00376183
MIDN	https://www.ensembl.org/id/ENSG00000167470	96.9916	93.9964	96.0951	101.309	93.4752	97.6313	109.555	112.156	118.56	142.159	136.05	141.491	0.524892	0.00192829	0.0146775	0.000163691
NDUFB11	https://www.ensembl.org/id/ENSG00000147123	116.668	114.691	123.636	103.799	108.206	104.592	108.223	108.067	123.283	106.614	113.91	106.396	0.0253018	0.508955	0.434388	0.306441
DNPH1	https://www.ensembl.org/id/ENSG00000112667	129.54	133.139	120.292	130.888	125.604	117.35	99.4629	89.8998	90.2531	99.3428	103.956	98.2243	0.608973	0.130522	0.00256787	0.0140293
SLC35B2	https://www.ensembl.org/id/ENSG00000157593	134.927	126.014	122.514	115.356	104.517	111.021	113.119	113.328	111.056	93.4845	95.7114	95.1291	0.0235614	5.89483e-05	0.0488879	0.0340412
GJB3	https://www.ensembl.org/id/ENSG00000188910	110.708	102.627	97.7684	86.0902	80.4779	86.8562	133.355	130.287	145.355	117.902	121.927	121.91	0.0198133	0.0657198	0.00598876	0.000278108
GET3	https://www.ensembl.org/id/ENSG00000198356	126.446	116.892	103.738	112.67	114.623	113.821	115.593	110.797	105.065	100.185	103.694	111.698	0.791622	0.311823	0.527678	0.126087
SEZ6L2	https://www.ensembl.org/id/ENSG00000174938	102.239	90.7787	93.5254	99.9017	108.288	109.349	115.268	116.726	126.047	116.432	125.226	130.937	0.0878637	0.422287	0.00786179	0.0282895
ATP2A2	https://www.ensembl.org/id/ENSG00000174437	109.657	106.885	86.6898	114.934	108.047	126.055	116.94	117.031	99.253	112.074	115.897	120.323	0.169727	0.495343	0.347208	0.968624
MYRF	https://www.ensembl.org/id/ENSG00000124920	93.3482	104.377	85.7965	125.91	104.187	135.123	109.263	109.538	98.0407	128.493	116.123	123.483	0.0771962	0.0308278	0.175463	0.929399
ARRDC4	https://www.ensembl.org/id/ENSG00000140450	107.214	114.144	124.659	98.5027	86.277	101.474	132.866	134.672	138.052	101.825	98.8082	94.9877	0.0447299	0.000187797	0.049571	0.584802
MCRIP2	https://www.ensembl.org/id/ENSG00000172366	113.865	112.381	110.806	106.957	109.486	103.223	102.666	104.434	101.4	119.383	123.664	124.512	0.0670916	0.00139708	0.00158062	0.00289061
BAG6	https://www.ensembl.org/id/ENSG00000204463	107.383	102.874	89.7528	104.112	101.949	106.993	116.221	118.183	121.724	117.693	116.912	127.333	0.501498	0.639878	0.0609087	0.0255025
CFDP1	https://www.ensembl.org/id/ENSG00000153774	118.23	128.97	121.182	95.6573	89.8138	94.7104	114.354	110.79	108.396	115.136	121.361	112.302	0.00338179	0.197439	0.0480229	0.00337162
COPB2	https://www.ensembl.org/id/ENSG00000184432	89.0406	86.5407	90.6348	107.973	104.97	117.646	101.662	98.2254	115.216	135.85	138.959	142.116	0.0223161	0.0145696	0.0813289	0.00761361
EMC7	https://www.ensembl.org/id/ENSG00000134153	109.622	103.034	102.929	133.278	134.984	131.738	95.1846	95.3958	98.4208	107.915	111.594	104.091	0.00218239	0.0188732	0.0394276	0.00258964
UBE2L3	https://www.ensembl.org/id/ENSG00000185651	123.961	120.805	108.585	108.112	110.701	107.956	116.383	112.373	110.512	97.2074	105.054	106.487	0.195897	0.0505097	0.428192	0.164236
MGAT4B	https://www.ensembl.org/id/ENSG00000161013	96.305	96.7233	93.2572	88.7715	76.6463	85.9938	117.435	125.202	120.916	138.475	143.653	144.117	0.0763895	0.0022805	0.00226403	0.000864967
EBPL	https://www.ensembl.org/id/ENSG00000123179	131.116	128.697	128.494	78.3484	84.8566	77.237	119.255	119.929	126.018	111.008	112.717	109.706	0.000855996	0.0258799	0.0549349	0.00256727
TNFRSF1A	https://www.ensembl.org/id/ENSG00000067182	104.303	99.6539	101.342	99.0181	93.5354	98.1965	119.436	117.095	117.148	121.049	126.482	129.302	0.0937513	0.0744799	0.00152296	0.00105877
RPS19BP1	https://www.ensembl.org/id/ENSG00000187051	126.106	118.086	111.817	117.36	105.664	111.665	102.095	101.584	100.909	111.783	115.122	102.417	0.256541	0.161396	0.0526613	0.743003
REEP4	https://www.ensembl.org/id/ENSG00000168476	111.832	110.032	118.981	128.271	124.169	125.682	98.1099	96.0626	108.406	101.848	97.9145	101.909	0.029981	0.945994	0.0592352	0.000148088
EGLN3	https://www.ensembl.org/id/ENSG00000129521	152.478	156.781	113.382	112.044	134.052	122.701	132.992	134.001	91.9995	52.9975	63.1984	52.885	0.327814	0.0380227	0.338742	0.00245811
ACY1	https://www.ensembl.org/id/ENSG00000243989	123.132	124.949	104.114	143.999	144.997	138.846	90.3613	94.7996	81.8379	91.2956	91.3598	88.7074	0.0539357	0.742062	0.031042	0.000224222
AIDA	https://www.ensembl.org/id/ENSG00000186063	119.929	115.803	104.885	79.055	74.6086	83.9891	122.255	121.384	119.714	121.927	126.488	127.943	0.00543535	0.125266	0.231156	0.000327775
PLEC	https://www.ensembl.org/id/ENSG00000178209	97.0888	87.8	67.6606	88.092	78.6427	102.101	119.178	110.171	116.434	150.19	139.007	160.768	0.650033	0.0188998	0.0593669	0.00293299
BUD31	https://www.ensembl.org/id/ENSG00000106245	116.352	111.18	122.483	104.756	103.86	110.208	103.508	98.9372	112.616	108.836	114.385	109.69	0.0653643	0.275843	0.0905447	0.149968
SERF2	https://www.ensembl.org/id/ENSG00000140264	111.207	112.259	121.756	101.935	105.091	96.7031	105.917	105.971	116.224	110.7	114.282	114.463	0.0332575	0.38899	0.300128	0.0232844
PRPF19	https://www.ensembl.org/id/ENSG00000110107	136.492	128.265	95.9863	118.053	114.073	123.522	109.273	114.335	90.7123	93.5837	98.9462	92.1002	0.904587	0.300334	0.353534	0.00300187
GRB2	https://www.ensembl.org/id/ENSG00000177885	109.579	103.929	100.612	113.79	108.143	115.628	103.164	106.667	112.7	109.352	118.196	113.268	0.0878896	0.182829	0.504037	0.76643
EIF2A	https://www.ensembl.org/id/ENSG00000144895	107.264	99.8224	107.785	89.8625	88.248	94.3508	117.492	113.338	126.461	120.611	125.806	121.462	0.0138565	0.468627	0.0460372	0.000217332
ALDH3B1	https://www.ensembl.org/id/ENSG00000006534	104.34	100.906	94.0748	140.008	130.563	140.123	93.9053	97.8557	92.155	101.513	111.798	105.236	0.00106785	0.041107	0.230139	0.00217529
SSBP1	https://www.ensembl.org/id/ENSG00000106028	130.953	140.886	110.241	103.352	104.873	106.261	117.813	120.202	97.774	88.0325	97.6749	94.0593	0.128749	0.105071	0.254079	0.0447004
FGFR4	https://www.ensembl.org/id/ENSG00000160867	123.013	124.091	112.759	41.2358	40.2045	41.5087	154.196	160.632	160.713	118.464	114.077	120.66	0.00187656	0.000159709	0.00193364	0.000400824
MPST	https://www.ensembl.org/id/ENSG00000128309	123.004	114.778	121.438	88.0512	87.4668	82.3296	105.177	107.073	111.766	118.926	121.393	129.325	0.000666527	0.020957	0.0236224	0.00146225
ENC1	https://www.ensembl.org/id/ENSG00000171617	112.659	118.943	102.088	122.302	123.172	134.007	119.977	121.247	111.602	82.1651	82.5916	79.9377	0.0736401	0.00446225	0.342744	0.00517848
TMEM184B	https://www.ensembl.org/id/ENSG00000198792	96.8034	97.0389	106.494	122.9	121.869	126.302	103.504	105.087	109.208	103.429	106.434	111.04	0.0091503	0.730847	0.204358	0.00562674
PPP2R2A	https://www.ensembl.org/id/ENSG00000221914	111.729	107.648	103.425	103.508	96.8235	109.464	120.083	116.854	111.231	112.22	109.24	107.712	0.385239	0.118005	0.0749039	0.212
PSMD8	https://www.ensembl.org/id/ENSG00000099341	108.033	103.235	99.7842	119.455	120.668	112.246	104.048	104.114	107.638	106.706	109.199	112.476	0.0182167	0.117697	0.595955	0.0732084
ZFAND3	https://www.ensembl.org/id/ENSG00000156639	96.7221	92.8915	95.7472	121.362	115.798	120.319	103.589	104.548	109.312	111.975	115.427	119.451	0.000626688	0.0262605	0.0106179	0.271144
PPP1R1B	https://www.ensembl.org/id/ENSG00000131771	159.119	150.494	149.479	56.7036	64.4929	63.2027	111.576	116.16	114.634	102.738	112.937	105.519	2.99268e-05	0.132132	0.00203069	0.000399197
MFGE8	https://www.ensembl.org/id/ENSG00000140545	115.724	118.492	107.27	127.511	129.051	124.462	100.119	103.695	101.56	89.3478	95.0512	93.8373	0.0449103	0.0172853	0.0597215	0.000145668
HSPG2	https://www.ensembl.org/id/ENSG00000142798	99.767	95.8043	75.4881	156.485	139.704	179.525	100.231	92.9605	82.1676	94.8237	90.2903	98.6506	0.0113641	0.662922	0.884224	0.026834
TMC4	https://www.ensembl.org/id/ENSG00000167608	91.9122	92.4845	103.034	133.074	132.051	130.736	96.0698	100.045	103.479	109.429	103.092	110.098	0.00812115	0.0681996	0.400785	0.00492193
GTF2A2	https://www.ensembl.org/id/ENSG00000140307	111.016	113.12	107.173	133.947	136.564	145.822	99.5053	94.5306	90.3487	91.8	90.8108	90.0342	0.00656761	0.275482	0.0113088	0.00490235
KTN1	https://www.ensembl.org/id/ENSG00000126777	110.415	124.453	104.609	90.5553	63.157	89.0216	129.307	127.766	105.276	124.908	121.382	112.994	0.0468293	0.912789	0.48083	0.0347004
GOLM2	https://www.ensembl.org/id/ENSG00000166734	107.283	112.103	97.2485	107.973	87.5457	110.341	105.509	105.004	85.9064	133.501	125.954	125.264	0.697311	0.030908	0.44228	0.0545481
CANT1	https://www.ensembl.org/id/ENSG00000171302	120.049	120.506	101.371	110.095	110.393	116.267	102.451	109.059	97.6352	101.4	106.714	106.279	0.815134	0.670643	0.221695	0.0488493
SMOC1	https://www.ensembl.org/id/ENSG00000198732	97.4607	101.398	92.2212	214.069	200.223	221.829	74.3027	76.4171	72.9083	49.388	52.2769	48.0429	0.000850972	0.000138289	0.00715535	0.00105762
RNPS1	https://www.ensembl.org/id/ENSG00000205937	123.792	121.298	108.717	102.209	98.3456	101.976	111.336	116.872	105.686	99.7763	104.888	105.45	0.058574	0.117565	0.314384	0.321044
TIMM23	https://www.ensembl.org/id/ENSG00000265354	120.586	113.312	99.1777	110.259	121.767	109.502	102.661	107.139	94.3076	102.461	117.885	100.742	0.727258	0.446459	0.272116	0.374362
MRPL37	https://www.ensembl.org/id/ENSG00000116221	128.797	123.986	108.692	85.286	86.0979	82.3368	122.238	121.428	120.284	101.596	110.101	108.17	0.0240447	0.02488	0.904404	0.00581685
FUT3	https://www.ensembl.org/id/ENSG00000171124	96.9168	94.3039	98.5664	116.595	113.277	118.953	99.1737	103.257	108.936	113.148	115.332	119.867	0.000951993	0.0281719	0.110634	0.953757
SLC35A1	https://www.ensembl.org/id/ENSG00000164414	121.648	136.097	119.334	86.1336	67.3818	83.5593	119.217	121.58	101.201	118.208	111.757	109.912	0.00421717	0.925878	0.234476	0.0163408
EMD	https://www.ensembl.org/id/ENSG00000102119	103.227	96.3562	99.8367	116.309	106.769	112.636	99.9391	101.93	105.48	118.776	117.798	116.603	0.0282234	0.00538716	0.362593	0.165731
CTNNAL1	https://www.ensembl.org/id/ENSG00000119326	136.664	133.786	112.513	89.0716	88.0821	93.3617	117.76	120.833	108.168	99.5062	100.497	95.3794	0.0340939	0.0320242	0.253186	0.0212965
LSM14A	https://www.ensembl.org/id/ENSG00000257103	114.378	115.794	108.581	96.6845	94.7218	104.889	112.444	110.38	101.516	110.879	115.904	109.331	0.0248449	0.382696	0.30679	0.0301127
NAA20	https://www.ensembl.org/id/ENSG00000173418	121.975	121.181	105.482	117.731	121.264	112.811	106.64	104.837	96.6963	91.3125	98.8195	96.6666	0.870134	0.139633	0.112149	0.00291678
NOC2L	https://www.ensembl.org/id/ENSG00000188976	131.524	123.221	93.934	97.1682	98.1901	99.6796	117.952	120.385	100.164	103.344	105.235	104.496	0.257045	0.314712	0.811163	0.00354612
ZC3H15	https://www.ensembl.org/id/ENSG00000065548	112.339	114.084	106.199	107.032	101.237	107.755	105.388	106.234	101.763	111.451	113.166	107.85	0.156184	0.0387118	0.0973409	0.106773
UBE2R2	https://www.ensembl.org/id/ENSG00000107341	98.8724	90.0268	104.055	97.9001	104.758	102.861	109.239	108.091	122.041	111.842	121.031	123.772	0.428923	0.375281	0.0636428	0.0235281
RTN4	https://www.ensembl.org/id/ENSG00000115310	116.863	119.211	107.463	99.5573	92.0936	104.198	116.708	117.546	117.201	101.025	100.731	100.674	0.0342201	2.02786e-05	0.538857	0.597387
NDUFV1	https://www.ensembl.org/id/ENSG00000167792	108.38	110.342	99.8061	111.151	108.753	107.755	100.576	102.715	101.825	112.198	117.358	110.909	0.450362	0.0192151	0.299743	0.149975
SCARB2	https://www.ensembl.org/id/ENSG00000138760	101.281	98.1342	88.19	99.2122	95.2018	106.836	110.512	111.159	102.885	120.833	127.668	129.287	0.433377	0.00877772	0.0692899	0.00496377
HYOU1	https://www.ensembl.org/id/ENSG00000149428	102.91	93.04	77.064	111.315	108.343	119.142	100.187	102.083	96.2882	120.207	125.853	132.282	0.0839327	0.00705893	0.375845	0.0503629
NME3	https://www.ensembl.org/id/ENSG00000103024	102.729	111.531	108.017	126.548	117.929	122.241	88.0855	89.334	91.103	117.23	108.88	104.851	0.0142689	0.0241504	0.0125949	0.0618127
ITPK1	https://www.ensembl.org/id/ENSG00000100605	99.5445	92.8666	91.1037	107.869	106.672	109.804	103.18	104.507	112.947	113.414	120.482	125.869	0.023648	0.0524359	0.0377858	0.0740148
TMEM214	https://www.ensembl.org/id/ENSG00000119777	86.4373	83.7962	94.5366	102.058	93.6039	103.745	104.044	98.688	120.688	130.378	127.996	141.991	0.0624505	0.039237	0.0795884	0.00439283
GLG1	https://www.ensembl.org/id/ENSG00000090863	106.306	102.728	90.3215	89.4342	83.6485	99.8422	115.359	112.981	109.045	123.541	125.109	127.808	0.263366	0.00628242	0.10638	0.0137076
TMED4	https://www.ensembl.org/id/ENSG00000158604	96.6476	99.4423	105.347	108.909	106.701	110.116	99.8926	98.5575	107.684	115.37	116.065	120.256	0.0722497	0.0173703	0.70392	0.0128645
PRRC2A	https://www.ensembl.org/id/ENSG00000204469	111.593	106.501	77.6837	95.3769	86.4492	103.91	125.339	127.876	111.963	109.832	112.304	116.055	0.794203	0.202349	0.146702	0.0605467
YARS1	https://www.ensembl.org/id/ENSG00000134684	103.041	95.4106	104.177	89.0927	93.6028	90.4325	98.0251	102.533	112.64	125.84	134.248	135.163	0.0513381	0.00892648	0.535737	0.0015847
CDK4	https://www.ensembl.org/id/ENSG00000135446	140.467	140.249	120.204	71.1214	71.5649	70.6098	124.118	125.773	114.128	99.116	102.719	101.148	0.0112406	0.023441	0.203427	0.000624662
NPDC1	https://www.ensembl.org/id/ENSG00000107281	104.257	128.064	112.251	118.126	102.046	106.656	100.991	106.419	102.381	108.292	95.4488	94.9163	0.528333	0.493844	0.235721	0.221356
TMED7	https://www.ensembl.org/id/ENSG00000134970	97.3479	93.1778	90.9413	96.0872	101.118	106.393	103.184	105.509	104.113	125.82	130.123	125.126	0.116823	0.0014627	0.0208771	0.00444589
STARD7	https://www.ensembl.org/id/ENSG00000084090	126.595	127.637	96.1996	93.4755	94.9804	100.301	117.149	121.2	88.7404	100.871	106.611	104.938	0.18019	0.681046	0.620258	0.0442852
ALYREF	https://www.ensembl.org/id/ENSG00000183684	144.313	133.671	116.909	90.2217	83.7288	73.7781	112.6	112.523	111.397	93.9126	105.492	100.115	0.0106262	0.0644898	0.134534	0.0478245
GRK2	https://www.ensembl.org/id/ENSG00000173020	106.123	104.206	99.2546	103.576	88.4223	102.156	105.192	103.494	111.445	118.269	117.104	118.506	0.406605	0.0395304	0.330832	0.0531065
ETF1	https://www.ensembl.org/id/ENSG00000120705	102.213	99.6803	86.7586	110.986	110.503	117.86	108.065	104.557	101.776	108.371	114.722	112.126	0.0524395	0.0552706	0.207416	0.672325
OXA1L	https://www.ensembl.org/id/ENSG00000155463	100.591	98.4723	85.0796	115.019	106.669	115.063	108.641	108.343	105.144	110.305	113.866	110.2	0.047848	0.0684378	0.114352	0.812666
TRIAP1	https://www.ensembl.org/id/ENSG00000170855	84.7792	86.4705	78.9343	254.024	253.305	253.062	50.922	49.9009	42.0272	40.6901	43.1074	39.9777	0.000144997	0.141472	0.000720323	3.90486e-06
SNCG	https://www.ensembl.org/id/ENSG00000173267	102.982	100.641	104.827	159.481	168.434	152.342	84.3817	81.6853	93.4688	74.3013	82.3468	71.9018	0.00430297	0.0969379	0.0337541	0.000262743
PES1	https://www.ensembl.org/id/ENSG00000100029	129.324	122.437	106.523	97.8063	106.661	96.0982	105.679	103.413	94.7179	99.3363	107.537	106.411	0.0860473	0.497725	0.0972141	0.368785
GTF2F1	https://www.ensembl.org/id/ENSG00000125651	103.35	97.0439	98.7525	112.416	111.952	110.514	109.625	100.369	109.36	103.625	105.513	110.784	0.0172764	0.962139	0.14694	0.137503
CEBPB	https://www.ensembl.org/id/ENSG00000172216	89.051	84.909	92.8546	110.574	101.574	99.6663	100.861	105.366	102.619	128.454	127.564	129.002	0.0262611	0.00119857	0.011281	0.0172521
PRR15L	https://www.ensembl.org/id/ENSG00000167183	158.623	159.445	131.604	92.4091	89.7863	99.162	94.3418	97.2069	84.3517	85.6642	93.4077	82.8412	0.0184732	0.407312	0.0133673	0.200087
KARS1	https://www.ensembl.org/id/ENSG00000065427	115.038	106.992	92.4805	90.0783	93.8291	94.6806	113.743	112.359	107.514	108.518	116.736	115.968	0.207406	0.480485	0.439491	0.00550668
CXCL16	https://www.ensembl.org/id/ENSG00000161921	95.8335	92.1283	91.4378	104.187	101.914	104.588	106.392	110.901	108.152	113.963	119.991	118.069	0.00538597	0.0188405	0.00126655	0.0071127
AKR1C3	https://www.ensembl.org/id/ENSG00000196139	104.256	94.8978	88.7629	108.903	112.822	115.276	93.5139	95.7983	100.864	119.31	119.568	113.198	0.0522935	0.00238127	0.890222	0.146856
TMEM258	https://www.ensembl.org/id/ENSG00000134825	94.1858	99.268	109.243	114.384	121.443	110.006	88.6909	93.4259	107.789	107.759	109.164	108.117	0.064836	0.177581	0.58992	0.171133
PDXDC1	https://www.ensembl.org/id/ENSG00000179889	85.543	95.9336	87.4734	92.1761	76.683	91.3549	104.48	106.84	102.746	144.389	135.017	140.519	0.655034	0.00195869	0.0301539	0.00237245
GOLT1A	https://www.ensembl.org/id/ENSG00000174567	102.289	100.896	98.853	141.356	148.518	131.606	88.2724	89.4692	87.1934	92.0689	93.7464	88.1993	0.0121855	0.198548	0.00100574	0.00546295
ALCAM	https://www.ensembl.org/id/ENSG00000170017	92.9199	100.756	88.9926	124.507	101.045	133.095	113.373	116.094	97.8691	99.3943	96.4981	97.4735	0.105119	0.181737	0.102724	0.150014
PSMC5	https://www.ensembl.org/id/ENSG00000087191	116.561	115.157	96.1826	125.555	114.078	122.061	102.972	97.4463	89.1842	95.463	96.1421	91.2101	0.225267	0.640096	0.187258	0.00740041
ATP6V0B	https://www.ensembl.org/id/ENSG00000117410	96.8045	91.3333	92.6418	125.909	132.907	126.773	90.7981	93.5501	95.6253	106.081	107.386	101.641	0.000344712	0.00713258	0.907249	0.00139645
LIF	https://www.ensembl.org/id/ENSG00000128342	92.741	118.423	75.1378	130.528	91.941	123.836	104.051	108.661	72.9004	131.578	103.776	106.067	0.312425	0.26753	0.989781	0.918487
PTTG1	https://www.ensembl.org/id/ENSG00000164611	117.985	109.078	118	49.2722	55.3856	49.1802	124.226	126.602	164.513	109.19	121.586	113.218	0.000136726	0.204169	0.210298	0.000477695
PUF60	https://www.ensembl.org/id/ENSG00000179950	111.978	104.473	97.3868	103.775	104.852	103.383	104.457	108.488	110.69	102.412	99.8646	105.999	0.898567	0.115011	0.532887	0.56036
MUC5B	https://www.ensembl.org/id/ENSG00000117983	98.2262	99.8575	78.1351	121.817	106.141	147.561	113.29	99.5349	89.3005	104.575	96.8764	102.172	0.0927205	0.950797	0.430289	0.181908
TOP2A	https://www.ensembl.org/id/ENSG00000131747	147.72	136.802	119.248	13.0332	11.0391	15.089	157.403	152.525	169.259	109.445	115.573	110.197	0.00401698	0.00505632	0.073541	1.14025e-05
G3BP2	https://www.ensembl.org/id/ENSG00000138757	95.5439	93.3223	92.2852	95.1007	98.7717	108.102	104.983	105.017	114.71	112.05	118.789	118.072	0.209952	0.116729	0.037276	0.0361294
NECTIN2	https://www.ensembl.org/id/ENSG00000130202	100.565	92.7867	101.654	96.1433	99.5943	102.581	103.75	104.977	114.152	108.684	113.829	116.771	0.760788	0.254334	0.0990532	0.0118838
TM4SF4	https://www.ensembl.org/id/ENSG00000169903	137.22	121.637	110.615	81.3882	85.7304	85.5308	105.255	104.922	98.0605	101.887	113.861	109.034	0.0335073	0.267992	0.107822	0.011177
TNNT1	https://www.ensembl.org/id/ENSG00000105048	124.125	117.384	140.427	39.3027	36.5369	36.1882	143.206	136.678	144.177	107.898	119.121	109.671	0.00499181	0.00363455	0.167076	0.00110944
SDCBP	https://www.ensembl.org/id/ENSG00000137575	108.24	104.115	94.3306	78.9287	81.7099	78.8497	119.615	116.095	113.529	114.658	123.726	120.131	0.0273004	0.392262	0.0584011	0.00187598
UFC1	https://www.ensembl.org/id/ENSG00000143222	111.88	114.073	101.053	101.06	99.1191	94.6122	103.361	109.459	109.698	98.9833	105.398	104.939	0.0992794	0.207322	0.762836	0.160717
TMEM205	https://www.ensembl.org/id/ENSG00000105518	117.982	117.523	111.267	83.7081	85.1351	80.2489	107.128	107.497	101.306	109.537	118.073	114.019	0.000505374	0.0567403	0.0255188	0.00120468
MMP24OS	https://www.ensembl.org/id/ENSG00000126005	113.8	110.5	113.803	140.528	144.121	136.344	85.5529	87.9413	85.6551	76.8221	80.9963	76.8129	0.00183148	0.0128767	8.73601e-05	7.95479e-05
SPAG7	https://www.ensembl.org/id/ENSG00000091640	108.794	102.162	113.739	103.861	100.607	105.796	98.4874	95.3743	101.8	106.553	110.475	105.163	0.288659	0.0232801	0.0825928	0.14463
HCFC1R1	https://www.ensembl.org/id/ENSG00000103145	134.43	130.964	137.46	72.8798	73.8301	76.0061	130.199	128.343	135.604	75.9315	79.3382	76.0668	0.00011362	0.000209889	0.370962	0.120556
ENSA	https://www.ensembl.org/id/ENSG00000143420	123.084	134.8	104.152	114.304	106.776	109.804	101.7	100.849	84.1465	90.2935	92.0343	88.6512	0.365085	0.457016	0.0883066	0.00486109
RAB4A	https://www.ensembl.org/id/ENSG00000168118	97.055	95.2877	97.1455	101.794	95.9439	97.8213	107.217	107.065	114.301	106.695	115.975	113.791	0.363733	0.515899	0.0260325	0.0208326
ATP5PF	https://www.ensembl.org/id/ENSG00000154723	118.291	118.227	105.858	105.182	103.653	97.6773	98.7502	103.134	94.1907	96.3036	107.207	101.172	0.0821771	0.521691	0.0433847	0.883871
ATP5MC1	https://www.ensembl.org/id/ENSG00000159199	132.738	132.306	109.961	87.982	104.356	91.0652	100.421	95.8379	84.9171	98.8676	107.682	103.091	0.0344089	0.165242	0.0325257	0.219363
MYO1C	https://www.ensembl.org/id/ENSG00000197879	102.836	101.35	79.0514	89.3606	80.2853	95.3175	118.865	124.523	107.076	116.322	113.948	119.394	0.538175	0.964288	0.0819617	0.0146412
JPT2	https://www.ensembl.org/id/ENSG00000206053	129.025	126.834	92.1461	112.303	107.525	119.535	112.329	116.499	91.0048	78.8487	82.6278	78.9684	0.835652	0.0752785	0.55285	0.00593359
CCDC12	https://www.ensembl.org/id/ENSG00000160799	109.793	107.76	120.683	93.2684	100.001	83.5736	103.475	98.4917	112.06	101.502	105.939	109.926	0.0317025	0.824817	0.22568	0.086606
HNRNPDL	https://www.ensembl.org/id/ENSG00000152795	102.894	119.153	104.114	97.7395	64.2974	89.1747	112.613	115.525	108.302	128.104	103.49	100.928	0.113858	0.895703	0.591572	0.111782
RSL1D1	https://www.ensembl.org/id/ENSG00000171490	116.451	107.901	96.706	88.0687	84.5422	89.9463	119.18	119.592	109.455	102.233	108.612	103.435	0.0670734	0.0548693	0.258526	0.00277561
GFPT1	https://www.ensembl.org/id/ENSG00000198380	86.7748	77.8222	96.9329	83.2253	82.4115	90.6175	96.8612	91.2156	111.779	138.319	145.734	143.718	0.793014	0.012281	0.197291	9.02919e-05
IRF6	https://www.ensembl.org/id/ENSG00000117595	89.2947	88.661	99.2345	89.665	91.7594	97.2883	107.408	104.527	124.251	114.589	117.999	120.711	0.908533	0.455155	0.0649715	0.00128317
CORO1C	https://www.ensembl.org/id/ENSG00000110880	105.205	105.058	91.7441	82.5151	78.4132	85.9314	117.864	119.273	115.512	110.428	115.156	117.39	0.0362475	0.258314	0.0560506	0.000436905
HLA-F	https://www.ensembl.org/id/ENSG00000204642	99.1308	109.426	102.803	107.413	92.575	100.197	101.705	106.035	92.9478	120.316	108.15	103.236	0.520416	0.185144	0.509252	0.190926
TOMM34	https://www.ensembl.org/id/ENSG00000025772	116.51	111.091	89.0187	93.9035	91.4375	89.4312	115.795	110.32	103.587	106.483	111.012	105.096	0.23712	0.59183	0.668697	0.00275728
ZG16B	https://www.ensembl.org/id/ENSG00000162078	63.8647	63.6749	59.8729	178.412	186.773	176.819	63.2122	69.097	49.7715	111.818	114.08	105.398	0.000115859	0.00540851	0.788091	7.82844e-05
ACP1	https://www.ensembl.org/id/ENSG00000143727	107.637	106.17	113.446	89.4468	86.0905	90.9338	103.691	107.549	105.399	110.766	108.539	110.164	0.00287432	0.0407471	0.25135	0.00124248
CXADR	https://www.ensembl.org/id/ENSG00000154639	89.0392	92.1398	103.277	78.3956	75.2923	87.9661	113.105	111.611	116.705	124.852	123.218	123.298	0.0695601	0.0141703	0.036472	0.00683329
NELFB	https://www.ensembl.org/id/ENSG00000188986	112.845	113.808	106.835	93.4256	88.498	87.9292	108.407	110.046	105.15	99.898	105.793	105.619	0.00194539	0.170616	0.285577	0.00626825
BTG1	https://www.ensembl.org/id/ENSG00000133639	93.6196	83.7419	99.8094	98.9954	101.827	98.6715	105.239	103.684	121.038	107.696	113.633	109.954	0.249922	0.945379	0.0741093	0.0110545
PXN	https://www.ensembl.org/id/ENSG00000089159	101.446	98.5994	99.7693	88.6079	83.2207	88.7179	113.385	113.433	116.592	106.07	112.789	114.767	0.00891138	0.344022	0.000564294	0.00253688
NEU1	https://www.ensembl.org/id/ENSG00000204386	78.8216	74.4055	88.5067	104.436	102.926	102.64	100.119	98.0969	140.908	112.679	116.026	117.347	0.0300273	0.884012	0.136113	0.0064288
POLR2C	https://www.ensembl.org/id/ENSG00000102978	93.8729	90.1374	94.6819	103.828	99.4379	108.574	87.336	89.6272	101.631	119.584	123.867	124.099	0.0334604	0.0143768	0.994917	0.00763039
MGAT5	https://www.ensembl.org/id/ENSG00000152127	103.359	102.709	83.5693	136.109	126.157	152.566	92.5142	94.5347	83.6232	86.6269	85.8178	88.0673	0.0151915	0.419451	0.45058	0.0210386
GGCT	https://www.ensembl.org/id/ENSG00000006625	111.662	125.664	106.575	111.519	104.91	109.139	101.305	99.4432	91.4965	93.0556	91.3211	87.9179	0.399907	0.144222	0.0749187	0.00239515
TCEAL9	https://www.ensembl.org/id/ENSG00000185222	97.7087	97.776	103.384	104.042	105.629	111.123	94.8112	91.3083	94.9883	105.959	116.091	110.21	0.0635637	0.0172529	0.0673117	0.35778
POLR3GL	https://www.ensembl.org/id/ENSG00000121851	101.418	99.4462	105.072	143.794	140.703	143.534	84.4817	81.5936	80.9472	81.5422	87.3901	82.7905	0.000128108	0.502023	0.00114627	6.61899e-05
RUSF1	https://www.ensembl.org/id/ENSG00000140688	85.3073	86.2761	85.9287	102.038	92.8742	102.203	95.7347	101.483	106.874	126.157	120.562	126.003	0.0493482	0.00718203	0.0394106	0.00447795
CRIP1	https://www.ensembl.org/id/ENSG00000213145	153.482	148.805	161.12	54.2931	61.4652	51.1745	114.858	113.707	121.18	82.074	83.8976	84.5311	3.72914e-05	0.0025229	0.00176735	0.00872556
TWF2	https://www.ensembl.org/id/ENSG00000247596	99.2447	97.6255	95.0117	127.541	124.625	122.57	89.6109	90.6604	88.4634	93.6904	100.175	98.3161	0.000150931	0.0446106	0.0115636	0.000505858
PPP2CA	https://www.ensembl.org/id/ENSG00000113575	105.787	103.165	98.0103	93.3275	95.4973	97.9584	104.212	109.159	104.231	101.394	106.887	105.059	0.0787309	0.57112	0.282573	0.014471
EIF3I	https://www.ensembl.org/id/ENSG00000084623	104.658	100.932	90.9265	115.641	122.531	119.423	91.1438	90.4838	92.315	97.1657	101.442	97.6547	0.0225358	0.0200618	0.206196	0.00182239
FUCA2	https://www.ensembl.org/id/ENSG00000001036	114.835	116.02	95.0833	90.5218	90.615	97.6766	105.486	106.334	101.22	100.964	101.875	103.012	0.13551	0.265967	0.594835	0.0552264
LRRFIP1	https://www.ensembl.org/id/ENSG00000124831	103.752	108.123	108.842	81.6681	69.8326	86.2243	117.299	116.224	105.828	111.654	108.251	105.261	0.0213238	0.333162	0.225993	0.0170929
RAB5A	https://www.ensembl.org/id/ENSG00000144566	82.6358	85.2768	100.959	91.451	81.3335	90.8986	103.478	97.1273	107.187	127.292	127.396	127.063	0.809156	0.0138213	0.13733	0.00685274
ZFAND5	https://www.ensembl.org/id/ENSG00000107372	86.7641	85.3699	85.2894	134.893	123.438	135.913	87.4272	88.7554	89.0216	102.812	102.87	99.2825	0.00696213	0.003163	0.0195728	0.0121504
IQGAP1	https://www.ensembl.org/id/ENSG00000140575	100.45	94.5828	85.5581	78.4257	72.58	89.9776	116.913	114.401	111.891	114.805	117.703	122.776	0.121988	0.229371	0.030255	0.00815972
SNRPA	https://www.ensembl.org/id/ENSG00000077312	118.765	114.682	113.291	70.4106	70.6047	68.8003	115.392	120.69	116.297	96.8553	108.362	105.68	0.000429549	0.04009	0.462904	0.00903919
KLHDC3	https://www.ensembl.org/id/ENSG00000124702	111.118	106.697	107.491	89.6715	90.5864	91.9345	104.902	105.752	111.439	98.6027	98.6883	102.558	0.00160236	0.0472802	0.689231	0.00841427
RPL17-C18orf32	https://www.ensembl.org/id/ENSG00000215472	103.25	102.028	100.026	128.591	130.875	137.665	88.3486	79.7285	81.2285	86.9459	87.5926	92.7437	0.00402638	0.146142	0.0122055	0.000413994
CTSB	https://www.ensembl.org/id/ENSG00000164733	115.406	102.207	112.863	74.7423	72.3943	74.5659	111.986	109.148	125.294	102.191	109.482	107.994	0.0102128	0.207798	0.455412	0.00214357
RCC2	https://www.ensembl.org/id/ENSG00000179051	126.95	127.115	106.724	111.979	108.172	119.548	101.052	103.076	90.6776	74.1763	77.0615	71.0015	0.422156	0.0127393	0.0623616	0.00185738
FADD	https://www.ensembl.org/id/ENSG00000168040	118.363	112.831	99.8827	104.625	98.6954	104.407	104.208	109.804	88.3633	87.5049	94.4214	92.8938	0.28932	0.286612	0.32173	0.0187001
ZNF703	https://www.ensembl.org/id/ENSG00000183779	100.484	102.671	129.329	159.24	174.793	168.698	67.118	66.9178	73.9968	56.5949	56.3419	57.9713	0.0129052	0.0289167	0.0396467	0.00148879
MBOAT7	https://www.ensembl.org/id/ENSG00000125505	95.4434	94.0422	92.4768	105.892	101.301	106.697	103.528	100.241	105.343	99.9714	103.231	105.92	0.0112857	0.998862	0.0114871	0.544841
PTOV1	https://www.ensembl.org/id/ENSG00000104960	104.674	106.065	101.322	109.005	101.149	103.409	94.96	102.036	97.8822	102.578	95.3306	95.494	0.865023	0.883643	0.0914614	0.114633
AP3D1	https://www.ensembl.org/id/ENSG00000065000	93.7584	95.707	81.883	114.201	108.165	118.369	100.747	101.186	86.1896	103.64	100.314	107.959	0.0151366	0.245365	0.442365	0.0650014
IFI6	https://www.ensembl.org/id/ENSG00000126709	94.4892	90.5798	81.5282	146.783	157.397	145.961	88.4331	93.3453	83.5938	70.5899	81.6876	77.3738	0.000329361	0.050913	0.936109	0.000128356
NANS	https://www.ensembl.org/id/ENSG00000095380	105.581	100.268	97.0266	113.657	115.227	113.01	90.3735	88.6049	88.7152	97.9433	102.242	98.2823	0.0282372	0.00911691	0.0366783	0.00300577
CERS2	https://www.ensembl.org/id/ENSG00000143418	112.258	112.525	101.974	103.839	95.3428	100.566	95.3688	98.2296	96.3458	97.238	98.7116	98.4197	0.109737	0.217491	0.0643769	0.545782
TFG	https://www.ensembl.org/id/ENSG00000114354	89.5502	86.2191	93.6447	104.607	95.4014	111.866	93.6684	95.0909	97.6084	116.931	110.644	114.097	0.0795888	0.00208084	0.10136	0.161738
CSE1L	https://www.ensembl.org/id/ENSG00000124207	117.736	110.8	74.1781	94.4183	86.3726	105.647	114.151	121.291	101.428	91.9434	95.9357	95.2493	0.738121	0.0851142	0.500641	0.863562
CLU	https://www.ensembl.org/id/ENSG00000120885	81.3841	74.4342	77.3407	65.864	70.6082	68.9233	119.12	115.661	136.645	125.859	135.157	137.684	0.0240819	0.305072	0.0131375	0.00105385
PRPF8	https://www.ensembl.org/id/ENSG00000174231	104.692	96.2939	70.7796	83.3252	80.0374	96.4453	121.167	122.437	105.972	104.461	106.155	116.667	0.74956	0.324035	0.109033	0.0261971
EFNA1	https://www.ensembl.org/id/ENSG00000169242	87.3781	83.8422	100.552	66.292	64.7276	68.7082	107.9	114.451	131.452	130.281	121.346	130.854	0.0364344	0.308209	0.0390515	0.000861278
CES2	https://www.ensembl.org/id/ENSG00000172831	83.6461	81.4446	67.6047	211.54	207.123	218.029	71.6957	70.979	56.827	44.6357	45.4479	44.6498	8.29327e-05	0.0463922	0.187922	0.000327996
SAV1	https://www.ensembl.org/id/ENSG00000151748	121.02	124.093	95.7693	128.389	128.233	140.917	87.1196	89.2523	63.4548	73.6087	78.447	73.2816	0.157986	0.6208	0.0511772	0.00201524
DPCD	https://www.ensembl.org/id/ENSG00000166171	127.999	119.557	109.164	74.7778	76.91	77.642	118.468	115.8	99.7966	90.3335	99.189	92.998	0.0143118	0.0810212	0.397721	0.0141436
PNN	https://www.ensembl.org/id/ENSG00000100941	94.3901	117.6	114.674	89.3779	72.8363	87.3544	110.279	106.187	108.361	112.172	94.4491	93.8782	0.051421	0.30819	0.941218	0.10096
YME1L1	https://www.ensembl.org/id/ENSG00000136758	91.8231	91.1257	83.7824	90.5694	86.3828	98.1665	107.816	106.3	97.7438	113.404	114.077	119.349	0.553922	0.0440837	0.0220822	0.00816119
DDX5	https://www.ensembl.org/id/ENSG00000108654	94.9653	137.669	75.6063	125.729	72.4282	113.161	102.957	112.883	67.7113	126.809	85.1469	82.1438	0.968496	0.8683	0.738755	0.803729
TM9SF2	https://www.ensembl.org/id/ENSG00000125304	103.056	99.2508	78.6839	101.429	99.5383	107.408	98.9899	99.9818	83.3488	102.998	112.092	108.639	0.351968	0.107633	0.964476	0.224357
APOBEC3C	https://www.ensembl.org/id/ENSG00000244509	68.3496	65.7215	62.9216	263.541	279.16	274.046	36.7349	36.1143	33.8924	23.9608	25.678	24.4631	0.000137659	0.00116662	0.000370736	0.000296416
NR2F6	https://www.ensembl.org/id/ENSG00000160113	112.093	112.877	102.87	88.4064	78.0293	82.1959	98.3649	100.898	107.405	101.493	103.093	106.739	0.00395127	0.649791	0.169744	0.00867598
INPP1	https://www.ensembl.org/id/ENSG00000151689	94.4167	92.9905	89.0767	114.586	103.564	113.052	96.2397	96.5597	96.888	98.1	97.9797	100.803	0.0197732	0.116066	0.10828	0.0713296
BAK1	https://www.ensembl.org/id/ENSG00000030110	87.9288	77.4903	84.7107	136.495	136.913	134.261	80.6084	71.2934	86.6542	98.0068	100.373	97.8616	0.00202494	0.0459749	0.521214	5.63368e-06
ABHD2	https://www.ensembl.org/id/ENSG00000140526	84.0085	81.099	75.2095	108.557	100.872	120.435	87.9412	86.8465	85.0368	117.726	119.41	124.608	0.0204917	0.00118814	0.117412	0.194716
ENTPD2	https://www.ensembl.org/id/ENSG00000054179	110.658	125.492	109.709	82.3713	82.3392	80.332	107.854	113.287	107.816	90.7959	87.6932	90.5574	0.0208355	0.00205871	0.38886	0.00415697
PRODH	https://www.ensembl.org/id/ENSG00000100033	43.8572	53.3546	39.0803	330.651	291.294	311.81	24.9036	25.6784	19.8865	17.0942	15.6817	15.5996	0.000585673	0.0476515	0.0213855	0.00145448
MAGED2	https://www.ensembl.org/id/ENSG00000102316	84.5605	81.9683	82.291	115.157	112.279	121.48	87.847	85.704	94.0693	111.648	102.488	108.784	0.00380007	0.00762461	0.118762	0.0867056
ETS2	https://www.ensembl.org/id/ENSG00000157557	119.163	120.889	119.049	59.5955	61.4851	63.7181	119.078	122.921	117.92	93.4883	94.8722	94.8816	3.15499e-05	0.00175457	0.878741	0.000344382
PARL	https://www.ensembl.org/id/ENSG00000175193	113.534	107.049	107.019	93.4806	90.4442	90.4384	97.3973	97.6194	95.4533	94.6364	102.753	95.3508	0.00613477	0.801567	0.0212127	0.129103
TAP1	https://www.ensembl.org/id/ENSG00000168394	79.9466	72.0635	73.3069	144.619	141.284	146.239	84.1908	82.494	84.744	90.2683	93.4181	92.4481	8.56202e-05	0.002837	0.0616988	3.04161e-05
USP22	https://www.ensembl.org/id/ENSG00000124422	100.469	97.6848	86.8943	86.3486	84.3256	96.2922	105.113	107.635	105.761	104.87	104.153	105.157	0.339336	0.187635	0.110124	0.0501802
SOX4	https://www.ensembl.org/id/ENSG00000124766	110.409	117.953	107.182	112.129	111.556	118.765	122.374	120.222	104.354	52.5223	54.2359	52.5125	0.593329	0.00766604	0.598755	0.000813943
MED10	https://www.ensembl.org/id/ENSG00000133398	109.18	116.244	110.388	93.0917	73.4087	89.9593	99.009	99.6662	97.4275	102.127	92.9831	99.2917	0.0372726	0.855608	0.0189593	0.162682
C11orf58	https://www.ensembl.org/id/ENSG00000110696	99.3841	101.043	91.7303	106.963	101.265	107.992	99.8795	99.703	87.3835	95.3795	96.9689	94.4361	0.0929665	0.989748	0.750321	0.0313159
ALDH1A1	https://www.ensembl.org/id/ENSG00000165092	114.57	116.107	110.791	45.709	47.8129	54.0416	119.429	115.529	112.211	113.593	121.095	110.688	9.37731e-05	0.881728	0.510658	0.00010522
CDC20	https://www.ensembl.org/id/ENSG00000117399	124.226	121.115	113.189	15.8823	18.3112	15.9632	129.013	134.174	163.089	113.543	113.164	119.499	0.000570087	0.123386	0.158155	8.15921e-05
NRDC	https://www.ensembl.org/id/ENSG00000078618	85.2817	93.3731	65.8258	106.483	95.4136	113.366	98.0689	101.752	83.3006	116.586	110.126	110.578	0.0831022	0.0710836	0.272445	0.294862
KRT17	https://www.ensembl.org/id/ENSG00000128422	104.744	80.2259	69.2142	163.26	158.576	160.999	84.6741	88.384	79.8662	60.6553	63.6475	63.5855	0.017158	0.0061819	0.972173	1.4066e-06
ALAS1	https://www.ensembl.org/id/ENSG00000023330	94.5682	86.4863	80.6939	117.082	116.504	128.19	84.0511	90.2019	79.9227	98.1983	102.469	98.8245	0.003868	0.0227796	0.642984	0.0222049
BAD	https://www.ensembl.org/id/ENSG00000002330	98.961	93.9669	83.3622	117.206	117.693	113.855	91.5008	83.1941	76.8314	99.7671	101.659	98.0938	0.0278988	0.0566872	0.258146	0.000557672
RTF2	https://www.ensembl.org/id/ENSG00000022277	97.3959	91.0691	83.7492	106.512	111.32	108.717	93.4944	89.3069	89.1804	99.0751	103.096	101.565	0.0328689	0.00502324	0.986608	0.0147157
NCBP2	https://www.ensembl.org/id/ENSG00000114503	101.382	107.448	93.6133	109.607	93.04	113.65	91.7124	96.318	80.7007	97.7821	98.0638	88.1217	0.575513	0.426283	0.141889	0.226374
SLC15A1	https://www.ensembl.org/id/ENSG00000088386	109.042	126.398	96.4297	107.792	89.6252	102.378	92.1233	95.2461	80.0156	96.3635	89.6041	86.2683	0.365277	0.786293	0.115447	0.22885
CDC42BPB	https://www.ensembl.org/id/ENSG00000198752	84.2438	87.2047	62.8524	118.021	97.0316	130.294	96.49	98.4355	78.1432	110.037	100.991	107.429	0.0430667	0.130455	0.269014	0.45668
HAX1	https://www.ensembl.org/id/ENSG00000143575	98.7802	91.9043	93.2772	97.3455	104.656	101.922	92.5123	91.9711	94.5486	97.0896	106.372	100.502	0.0903506	0.0820112	0.525283	0.997174
EHD4	https://www.ensembl.org/id/ENSG00000103966	99.3779	93.4077	93.588	101.488	101.454	106.189	93.4095	90.4762	94.4076	94.3814	101.147	100.347	0.0416397	0.0923477	0.317474	0.177143
PSMD14	https://www.ensembl.org/id/ENSG00000115233	116.22	120.091	91.6934	101.77	98.727	107.416	96.6128	97.3322	78.3749	87.9948	90.2488	83.1461	0.534868	0.624565	0.1705	0.0101356
OPTN	https://www.ensembl.org/id/ENSG00000123240	75.6514	75.7218	83.367	98.4047	88.5732	100.048	101.402	105.075	110.987	111.119	109.348	109.304	0.0202441	0.277402	0.00194767	0.054239
CDCP1	https://www.ensembl.org/id/ENSG00000163814	92.0446	85.882	77.9672	92.6286	86.176	100.569	106.935	107.828	93.9723	103.954	108.921	111.943	0.250223	0.365859	0.0441609	0.0471729
EXOSC7	https://www.ensembl.org/id/ENSG00000075914	104.187	113.346	105.059	93.9327	97.3115	90.3653	95.7377	88.0896	91.8605	92.2486	104.962	91.4437	0.0227591	0.443854	0.015056	0.66136
PARP4	https://www.ensembl.org/id/ENSG00000102699	90.3071	92.5179	65.0772	87.1041	67.426	96.1017	118.111	116.336	89.5266	124.305	107.697	113.96	0.944197	0.532819	0.118116	0.0433935
SUMO3	https://www.ensembl.org/id/ENSG00000184900	107.385	112.389	97.7257	97.7565	97.5861	97.9012	102.939	109.161	96.4427	80.5464	85.5179	82.872	0.200996	0.0211081	0.626198	0.00910981
SELENOH	https://www.ensembl.org/id/ENSG00000211450	111.852	115.766	118.017	101.886	93.8375	96.6365	96.7908	96.4775	83.8592	87.8621	84.5224	80.5934	0.00484537	0.191178	0.0204399	0.0145862
POF1B	https://www.ensembl.org/id/ENSG00000124429	119.859	122.217	97.5722	83.4192	73.9091	95.9485	101.238	103.906	74.0614	99.2825	101.174	95.5021	0.048895	0.619302	0.180794	0.148324
CHMP3	https://www.ensembl.org/id/ENSG00000115561	94.0891	95.0005	78.5971	136.833	128.041	142.152	86.2503	88.0358	78.8695	76.7458	80.4777	81.171	0.00288544	0.216184	0.479113	0.00260825
RCC1	https://www.ensembl.org/id/ENSG00000180198	106.578	106.611	94.5513	69.6316	64.3838	77.5016	109.951	105.366	110.872	107.112	104.656	108.189	0.00444806	0.368231	0.262781	0.00742153
CPOX	https://www.ensembl.org/id/ENSG00000080819	126.001	133.539	106.401	80.2776	69.4416	83.2687	109.721	106.511	91.5831	87.4926	86.9706	83.4019	0.0165366	0.0898015	0.12886	0.179368
THRAP3	https://www.ensembl.org/id/ENSG00000054118	101.42	103.374	93.8377	78.6139	69.0092	84.4109	104.134	103.593	106.868	106.529	105.783	103.869	0.0195677	0.703493	0.201356	0.0219434
HPRT1	https://www.ensembl.org/id/ENSG00000165704	124.104	129.955	104.136	66.2934	74.326	74.1785	99.6933	105.614	92.5421	93.2054	99.896	96.2586	0.0174071	0.553004	0.106809	0.00231874
GOT1	https://www.ensembl.org/id/ENSG00000120053	95.2382	87.8502	82.8148	70.4078	74.1413	72.1468	100.344	98.7362	112.221	115.772	125.421	124.911	0.0361246	0.0295638	0.0548641	0.00173407
ACTR3	https://www.ensembl.org/id/ENSG00000115091	97.4495	95.7864	86.4978	87.2916	85.72	90.8988	100.434	101.376	89.8641	107.681	108.605	108.381	0.259689	0.0957352	0.472721	0.00456603
TMEM9	https://www.ensembl.org/id/ENSG00000116857	110.117	100.274	115.468	79.0924	83.394	77.9807	99.2987	99.9528	104.1	92.0952	99.2728	98.1089	0.0146654	0.169883	0.228182	0.00530406
MPG	https://www.ensembl.org/id/ENSG00000103152	97.5061	98.1354	98.2143	99.7513	93.1824	90.1444	94.183	97.0971	94.4316	98.9424	97.9843	99.3536	0.332476	0.0468495	0.093244	0.259438
MAGEF1	https://www.ensembl.org/id/ENSG00000177383	107.108	113.252	91.6502	114.531	97.639	109.166	91.6039	86.2968	70.5621	94.5339	92.2918	89.1078	0.722838	0.281954	0.0784894	0.0821171
CLINT1	https://www.ensembl.org/id/ENSG00000113282	89.0621	87.5925	85.1056	74.4311	66.5496	79.2658	107.052	101.834	103.509	119.612	120.97	121.798	0.0540989	0.00344845	0.00129819	0.00500191
EHBP1L1	https://www.ensembl.org/id/ENSG00000173442	94.3148	96.9176	84.474	74.9828	61.7327	76.7771	109.481	105.145	97.178	122.418	115.214	117.566	0.028975	0.0360878	0.0829901	0.00384533
CAB39	https://www.ensembl.org/id/ENSG00000135932	91.6066	94.9526	87.4656	100.427	91.4655	105.104	91.7001	94.8455	87.4856	103.779	103.898	103.233	0.188615	0.0278513	0.999475	0.366075
CHMP1B	https://www.ensembl.org/id/ENSG00000255112	96.7211	102.051	89.4728	114.547	114.122	116.861	97.8642	95.995	77.0391	84.4534	86.0127	80.5819	0.0292113	0.426386	0.499664	0.000398449
STXBP2	https://www.ensembl.org/id/ENSG00000076944	83.6413	88.9205	98.7533	100.564	92.0695	97.9846	93.2685	90.2194	97.1098	104.683	101.936	106.16	0.291341	0.015475	0.572594	0.0803142
RBMX	https://www.ensembl.org/id/ENSG00000147274	117.839	119.51	92.7397	76.5054	73.2153	79.5609	114.196	116.429	102.028	86.0466	88.4785	86.9376	0.0548968	0.0311238	0.935655	0.0175588
DDX3X	https://www.ensembl.org/id/ENSG00000215301	98.2642	99.5885	87.9629	100.503	91.5842	108.454	101.746	99.8128	93.6954	89.5739	90.9708	90.0712	0.469465	0.073455	0.520065	0.176384
PCMT1	https://www.ensembl.org/id/ENSG00000120265	100.736	95.8306	103.227	82.0833	83.8303	79.5236	102.726	100.797	104.452	97.0198	100.747	101.179	0.0044126	0.153053	0.343684	0.000614674
RBBP7	https://www.ensembl.org/id/ENSG00000102054	124.653	133.78	101.005	73.0139	64.2814	71.3719	112.969	116.76	97.9846	86.2346	86.5647	82.4658	0.0286329	0.0458782	0.414764	0.0148628
SNX5	https://www.ensembl.org/id/ENSG00000089006	106.561	108.585	98.0228	95.8244	88.7082	95.4836	94.974	99.1703	97.2908	88.506	90.3882	87.0637	0.0558906	0.00623347	0.142861	0.169902
DCTN2	https://www.ensembl.org/id/ENSG00000175203	92.2586	87.2356	83.0299	85.4421	81.4008	89.4575	104.112	99.7932	108.174	104.037	107.851	107.779	0.589789	0.421943	0.0103605	0.00372158
UBE2D2	https://www.ensembl.org/id/ENSG00000131508	103.523	100.616	99.2811	81.6673	79.5552	78.6003	106.89	106.79	101.636	94.5113	100.494	96.4954	0.000287472	0.0325171	0.144532	0.00322902
DNAJB9	https://www.ensembl.org/id/ENSG00000128590	77.6482	65.859	75.6936	131.666	136.63	142.092	86.7939	88.7066	90.0598	84.3745	86.3565	83.9723	0.00021761	0.0424413	0.0439409	0.00213218
MT1G	https://www.ensembl.org/id/ENSG00000125144	113.608	127.309	116.351	29.5784	33.1282	28.4097	137.119	142.287	137.598	87.3713	100.121	96.8778	0.000877581	0.00273232	0.0285762	0.00133011
PLAAT4	https://www.ensembl.org/id/ENSG00000133321	71.2159	69.2718	72.887	164.211	186.216	162.497	60.4172	59.7573	59.3758	82.5186	80.6856	79.0454	0.00512152	0.0010878	0.00526902	0.00636364
RHPN2	https://www.ensembl.org/id/ENSG00000131941	100.353	93.8977	92.6419	66.887	63.3992	69.3526	113.34	113.732	109.189	108.611	113.418	102.872	0.000931404	0.3473	0.00744095	0.000981773
ILF3	https://www.ensembl.org/id/ENSG00000129351	104.624	107.507	91.1783	86.2516	75.8513	87.0961	106.175	108.041	100.671	93.6575	92.6449	93.3296	0.0490941	0.0317129	0.537433	0.106047
SRSF5	https://www.ensembl.org/id/ENSG00000100650	81.4709	154.008	106.799	115.544	46.301	87.2125	88.7471	92.5426	81.6211	118.304	88.1338	84.8918	0.348171	0.471587	0.338858	0.578848
PPP2R1A	https://www.ensembl.org/id/ENSG00000105568	99.2048	93.5295	89.2894	89.9541	93.5702	91.88	98.9342	100.191	101.108	91.8891	97.5501	98.0848	0.531473	0.156921	0.163774	0.168202
BTBD1	https://www.ensembl.org/id/ENSG00000064726	90.8845	96.1289	81.0418	94.6116	86.1702	102.281	93.0538	102.245	81.6582	104.792	107.27	103	0.479422	0.161752	0.711163	0.14122
NAPRT	https://www.ensembl.org/id/ENSG00000147813	91.7637	98.2334	78.5865	140.973	141.323	133.001	72.5208	76.2835	69.4544	84.6448	76.2592	79.6732	0.00557404	0.0793129	0.0884593	9.76548e-05
M6PR	https://www.ensembl.org/id/ENSG00000003056	101.885	103.102	85.2656	79.237	81.0355	81.8305	109.196	112.085	96.0308	93.4161	101.009	98.3032	0.105576	0.2346	0.301451	0.0103156
GAR1	https://www.ensembl.org/id/ENSG00000109534	111.601	101.143	105.152	78.9078	75.4701	66.2359	100.927	96.839	99.8215	96.2964	105.799	103.102	0.00306208	0.476132	0.143995	0.00504051
ZBTB7A	https://www.ensembl.org/id/ENSG00000178951	82.3183	82.781	87.8494	79.5282	74.7726	79.4965	96.8394	94.8486	99.6084	117.252	121.237	124.572	0.055452	0.00139106	0.00560127	0.000139023
RNF10	https://www.ensembl.org/id/ENSG00000022840	94.6059	90.8093	81.7073	90.3642	84.3071	93.3044	101.856	101.239	96.8544	98.3458	105.402	101.925	0.954552	0.502236	0.0878769	0.0221713
CITED2	https://www.ensembl.org/id/ENSG00000164442	105.189	93.2554	81.7456	106.66	95.1283	98.5165	104.043	97.6245	92.8822	90.2532	89.8583	85.0241	0.442563	0.0742105	0.570696	0.0565203
MRPL49	https://www.ensembl.org/id/ENSG00000149792	97.2362	90.9343	85.4912	117.091	119.091	122.146	81.7103	84.9351	83.2555	82.0051	85.3167	89.0736	0.00648732	0.410509	0.136578	0.000308653
RAB8A	https://www.ensembl.org/id/ENSG00000167461	111.859	103.823	87.4704	85.8899	85.9169	89.3171	101.147	98.9828	95.6347	90.035	94.3071	93.6852	0.187497	0.0488997	0.766966	0.0335591
SLC16A1	https://www.ensembl.org/id/ENSG00000155380	111.946	111.471	104.115	74.5488	82.4714	80.8476	96.0874	94.2181	86.2245	94.8391	99.32	100.86	0.00104472	0.171019	0.0134141	0.00415357
EIF4G1	https://www.ensembl.org/id/ENSG00000114867	100.195	99.7098	76.3814	91.8695	85.9032	97.7736	103.127	104.801	90.6956	94.3458	95.1544	96.1486	0.979007	0.433836	0.467248	0.429849
YIF1A	https://www.ensembl.org/id/ENSG00000174851	75.0279	71.5571	97.498	75.7991	76.3564	74.4719	92.8025	87.7323	113.969	121.612	122.868	126.384	0.548726	0.0825737	0.215438	0.000200973
GPBP1L1	https://www.ensembl.org/id/ENSG00000159592	90.428	99.5599	86.7258	90.6284	76.6881	96.1005	99.0006	99.9649	89.3226	108.809	101.17	96.6911	0.561934	0.279837	0.492628	0.114656
RAB5B	https://www.ensembl.org/id/ENSG00000111540	86.5266	87.1297	87.6468	90.6307	84.1163	97.8822	96.7662	96.6732	97.0088	101.64	102.746	105.952	0.442696	0.0353086	0.000445561	0.0753047
UBXN4	https://www.ensembl.org/id/ENSG00000144224	96.9952	104.492	87.2859	95.009	79.6457	96.4273	102.15	102.657	78.3655	98.8921	97.7017	93.5139	0.466241	0.802188	0.854588	0.360166
HEXB	https://www.ensembl.org/id/ENSG00000049860	94.6912	89.7826	85.1596	83.3355	75.0697	80.1118	106.496	107.923	104.697	99.8833	104.553	101.334	0.0479511	0.0639577	0.0182545	0.00315603
MAOB	https://www.ensembl.org/id/ENSG00000069535	118.295	124.556	91.9698	84.4502	88.8516	86.8736	102.766	107.042	84.5356	76.7656	84.9189	81.8366	0.128063	0.121762	0.335709	0.129845
PSMC3	https://www.ensembl.org/id/ENSG00000165916	109.006	106.697	82.0619	112.341	107.069	101.909	92.5556	93.2476	80.8759	80.4163	82.9469	83.2367	0.464975	0.233899	0.359972	0.00953342
RPS6KA1	https://www.ensembl.org/id/ENSG00000117676	99.1878	93.4117	82.8365	102.522	100.29	107.812	85.9059	86.2162	85.2902	94.5183	97.4837	96.1752	0.118336	0.00381863	0.336182	0.0636994
TSR3	https://www.ensembl.org/id/ENSG00000007520	102.999	96.9381	91.2648	97.25	101.083	96.8852	88.9038	88.6015	87.1019	94.2979	96.6431	89.5699	0.741085	0.117232	0.11665	0.130695
NOL7	https://www.ensembl.org/id/ENSG00000225921	99.0605	105.049	92.1873	97.7123	97.1769	100.818	93.3829	95.1284	85.6185	88.3733	90.4685	86.3388	0.963665	0.422658	0.19699	0.00350759
KCTD5	https://www.ensembl.org/id/ENSG00000167977	85.6924	83.1441	90.8055	121.924	113.955	122.725	75.353	73.2	77.111	90.8393	99.3429	95.9211	0.000962393	0.00637463	0.0213476	0.00309454
PEA15	https://www.ensembl.org/id/ENSG00000162734	100.137	96.394	95.4784	113.054	109.969	118.698	90.881	83.1442	94.3809	72.6681	78.047	76.5292	0.00967934	0.036105	0.127045	0.000595819
APOD	https://www.ensembl.org/id/ENSG00000189058	118.204	110.909	109.211	101.083	122.98	104.024	97.633	100.137	93.5621	53.6716	60.3159	57.212	0.67992	0.000122456	0.0125587	0.0119623
SMIM15	https://www.ensembl.org/id/ENSG00000188725	99.2215	100.426	89.7561	69.8685	70.5932	72.1817	110.834	108.618	99.9122	97.9902	109.385	99.5307	0.0141124	0.443259	0.102996	0.0105258
CAPN5	https://www.ensembl.org/id/ENSG00000149260	81.8108	84.3521	73.8925	97.6462	85.5865	100.989	83.7329	86.0757	74.875	123.196	113.798	122.244	0.0679005	0.00117315	0.75645	0.0155726
USF2	https://www.ensembl.org/id/ENSG00000105698	86.8739	89.899	90.8124	95.9255	85.911	86.3748	93.9641	87.2748	94.1406	101.154	106.346	109.331	0.956536	0.0137663	0.383257	0.0190334
SLCO4A1	https://www.ensembl.org/id/ENSG00000101187	95.2502	96.4887	84.7381	112.037	99.5738	115.006	87.1558	89.5283	75.9868	97.0418	84.5025	90.5242	0.0530835	0.308154	0.230087	0.0413191
SLC39A1	https://www.ensembl.org/id/ENSG00000143570	102.329	97.7258	93.3968	76.0228	69.7411	75.503	105.681	104.937	102.729	95.5315	102.514	100.623	0.00226943	0.129566	0.111689	0.000884839
GDA	https://www.ensembl.org/id/ENSG00000119125	89.7257	96.4067	72.909	86.4241	75.3034	94.5221	96.955	101.32	75.1969	116.713	111.175	109.586	0.922329	0.109968	0.67632	0.0274171
ADSS2	https://www.ensembl.org/id/ENSG00000035687	108.346	114.554	84.2533	85.4972	76.5304	86.3836	103.432	102.906	80.275	94.0409	95.8397	92.766	0.158443	0.878856	0.599437	0.0590019
MRPS10	https://www.ensembl.org/id/ENSG00000048544	91.3548	89.9083	78.4983	93.5151	99.0356	99.3744	87.3757	82.9101	75.7848	107.625	112.152	106.802	0.101912	0.00622223	0.438046	0.0106392
DEK	https://www.ensembl.org/id/ENSG00000124795	131.084	141.97	107.119	57.7266	49.0131	60.2355	123.168	118.785	100.094	79.2805	81.4572	74.3604	0.013383	0.0289965	0.373282	0.00808699
MAGED1	https://www.ensembl.org/id/ENSG00000179222	77.8967	70.5529	74.9444	80.8207	80.4406	84.335	86.5002	81.2722	95.9213	126.904	130.452	134.193	0.0528918	0.00333535	0.0692906	0.00016886
HERPUD1	https://www.ensembl.org/id/ENSG00000051108	71.3806	63.1286	79.7456	72.1588	67.1954	75.2236	94.4362	97.3253	111.595	132.053	127.523	132.289	0.985212	0.0235046	0.0145217	8.67151e-05
MACROD1	https://www.ensembl.org/id/ENSG00000133315	104.718	100.586	95.3534	90.4394	97.6778	88.0614	88.815	88.66	89.6656	91.4581	97.4027	90.9981	0.108865	0.173551	0.0523618	0.748946
MSLN	https://www.ensembl.org/id/ENSG00000102854	137.55	121.639	117.883	86.8557	84.0506	87.2566	97.6453	97.8312	91.8915	64.2356	66.1772	70.169	0.0199917	0.000406382	0.0288377	0.00187651
AIP	https://www.ensembl.org/id/ENSG00000110711	96.317	88.5991	90.1506	91.033	100.083	94.9223	90.7376	87.1722	104.158	88.8961	95.7579	95.1584	0.358704	0.902882	0.710747	0.577491
NAP1L4	https://www.ensembl.org/id/ENSG00000205531	107.082	118.216	84.7145	117.269	96.1499	116.567	93.4432	96.7453	74.0364	76.3653	73.1133	68.9634	0.612932	0.155383	0.283221	0.0247245
PPA2	https://www.ensembl.org/id/ENSG00000138777	92.991	91.0692	75.7107	105.208	104.701	105.478	82.4599	85.649	72.9719	101.062	106.013	99.2885	0.07682	0.0145195	0.408589	0.27278
GAL3ST1	https://www.ensembl.org/id/ENSG00000128242	125.876	122.58	103.349	60.6705	64.7637	59.8271	116.819	112.336	91.1981	82.9701	92.1276	89.5545	0.012595	0.131842	0.378191	0.00290294
ABTB1	https://www.ensembl.org/id/ENSG00000114626	94.8586	94.6466	114.894	79.8318	75.7188	77.005	97.5347	93.6066	112.935	95.1914	92.3515	93.1711	0.0660844	0.316907	0.990983	0.000739175
GOLGA4	https://www.ensembl.org/id/ENSG00000144674	77.1591	95.4399	84.1975	103.864	70.0397	104.873	90.3743	86.1292	75.8361	121.503	109.255	103.033	0.604677	0.0190115	0.839424	0.247892
MYADM	https://www.ensembl.org/id/ENSG00000179820	112.656	109.43	120.126	50.5902	49.7386	50.6013	104.253	104.869	119.487	97.3735	99.7415	101.863	0.00229728	0.179489	0.492203	0.000409468
UQCRFS1	https://www.ensembl.org/id/ENSG00000169021	91.2314	91.6654	90.8849	92.8177	101.558	94.1665	89.3041	86.5141	90.6215	92.176	100.817	98.4667	0.211132	0.0653833	0.176952	0.808019
CLDN12	https://www.ensembl.org/id/ENSG00000157224	70.2956	73.9524	77.3556	92.4227	75.185	96.9694	86.1257	88.0615	94.5169	131.648	116.031	117.262	0.154633	0.0110396	0.00951071	0.0182388
NR1D1	https://www.ensembl.org/id/ENSG00000126368	96.1203	61.4181	70.9433	61.0448	60.8488	63.0044	107.729	102.543	108.748	139.334	123.509	124.507	0.29538	0.0342253	0.0956283	0.0050515
TNFRSF10D	https://www.ensembl.org/id/ENSG00000173530	89.9639	89.8663	91.3666	106.016	89.971	109.523	90.5711	93.6353	90.5887	87.2615	91.6064	88.8661	0.197055	0.224668	0.368981	0.166745
SH2D3A	https://www.ensembl.org/id/ENSG00000125731	87.6052	86.6166	92.0789	109.033	95.6128	103.219	93.0559	85.2742	100.719	87.9332	86.9144	91.0409	0.0536085	0.431553	0.448348	0.0579278
CUEDC2	https://www.ensembl.org/id/ENSG00000107874	107.671	104.889	87.243	95.5947	101.594	99.8104	91.9946	94.2648	81.2451	83.6456	86.7723	83.5308	0.899378	0.378205	0.239792	0.00466513
POLR2H	https://www.ensembl.org/id/ENSG00000163882	97.7371	98.6204	85.8177	115.095	116.749	118.906	84.84	83.9495	78.2383	82.997	79.6545	75.1532	0.0247269	0.374133	0.0864524	0.000796086
ANXA7	https://www.ensembl.org/id/ENSG00000138279	88.2206	87.6807	84.968	97.1765	92.0832	97.3541	85.7874	80.9549	86.5928	105.445	109.374	101.703	0.0201833	0.00210949	0.299079	0.026198
LRATD2	https://www.ensembl.org/id/ENSG00000168672	88.2645	88.0729	90.1209	91.7345	81.7815	100.206	88.5046	86.0622	88.6752	104.527	103.7	104.348	0.694808	0.00130481	0.375231	0.135194
AK1	https://www.ensembl.org/id/ENSG00000106992	73.5879	65.9622	64.9296	176.846	190.26	172.496	54.8638	51.777	54.1471	67.3097	72.7949	70.7591	0.000354833	0.00217633	0.023773	0.00114982
PAPOLA	https://www.ensembl.org/id/ENSG00000090060	94.0279	95.2445	86.3433	81.8519	73.7587	86.228	101.002	99.7982	89.9058	99.8655	103.5	103.049	0.0748068	0.271723	0.32793	0.0199257
POLD2	https://www.ensembl.org/id/ENSG00000106628	123.465	119.377	98.93	70.0981	71.9316	68.4538	108.441	108.718	98.863	78.8885	86.0235	80.8478	0.0270425	0.00598844	0.382163	0.0174268
DDAH1	https://www.ensembl.org/id/ENSG00000153904	112.81	113.15	88.3027	70.2571	66.3463	78.5557	100.726	101.312	85.9082	97.4165	98.7518	100.362	0.0404686	0.629258	0.424392	0.0134314
SNW1	https://www.ensembl.org/id/ENSG00000100603	96.9208	90.5241	89.7354	80.94	77.029	83.0619	98.4793	95.712	96.9338	97.0406	103.58	103.69	0.0157136	0.17412	0.168201	0.00204023
LONP1	https://www.ensembl.org/id/ENSG00000196365	108.232	105.417	90.6185	72.1522	70.4961	75.2112	108.444	110.733	96.1576	88.9327	94.2886	92.9427	0.0280516	0.0887871	0.631377	0.000873907
ATIC	https://www.ensembl.org/id/ENSG00000138363	121.479	113.787	89.0511	75.735	81.0168	80.4407	102.878	104.094	90.5184	78.4688	90.3884	85.7251	0.0932052	0.0645369	0.469548	0.232834
NTHL1	https://www.ensembl.org/id/ENSG00000065057	85.7728	85.4957	89.8369	105.35	106.09	103.476	76.6585	78.441	85.7481	96.2576	99.5358	99.8007	0.0012719	0.0126546	0.120009	0.0128018
HACD3	https://www.ensembl.org/id/ENSG00000074696	102.13	104.579	79.0192	90.4572	86.6968	97.139	89.0372	92.168	78.7255	93.9168	99.7202	98.6137	0.695557	0.101441	0.4157	0.182665
STT3A	https://www.ensembl.org/id/ENSG00000134910	94.3779	89.2502	90.2009	69.7552	71.0209	75.0049	96.4152	100.099	104.823	104.507	107.27	109.469	0.000974489	0.0938886	0.0422531	8.50996e-05
PARP1	https://www.ensembl.org/id/ENSG00000143799	120.342	121.828	85.8861	79.2826	71.2818	81.018	107.008	107.9	87.1081	81.8824	83.562	85.0395	0.103465	0.124582	0.565006	0.161963
EIF4A3	https://www.ensembl.org/id/ENSG00000141543	108.57	107.59	92.5807	78.1168	78.9356	83.1439	102.191	105.566	94.985	83.7097	87.9562	86.6377	0.0383648	0.0283872	0.760691	0.0415432
EIF5B	https://www.ensembl.org/id/ENSG00000158417	106.033	112.242	105.146	89.6669	84.9341	90.5427	91.4868	86.6316	76.6714	87.4872	92.9009	85.9535	0.00290745	0.486756	0.0188052	0.891178
MRFAP1L1	https://www.ensembl.org/id/ENSG00000178988	101.211	125.069	97.5787	101.196	89.0148	103.674	95.3077	92.1091	72.3453	79.9581	77.046	74.8254	0.379865	0.323263	0.131948	0.0344361
EIF4E	https://www.ensembl.org/id/ENSG00000151247	108.955	105.131	91.0398	83.9773	87.0764	91.2799	93.14	92.7511	86.8703	87.3444	94.2835	86.5059	0.105945	0.655047	0.176733	0.584457
MBNL2	https://www.ensembl.org/id/ENSG00000139793	85.4145	92.8011	90.7492	84.9031	70.8299	91.5619	98.7041	101.814	95.6279	103.507	94.1986	95.5816	0.361176	0.796158	0.035019	0.112693
COL17A1	https://www.ensembl.org/id/ENSG00000065618	99.257	94.9842	78.8599	152.666	135.764	168.695	76.0196	77.2509	61.3728	52.4505	52.9434	54.5675	0.00863008	0.0679814	0.0748015	0.00885099
WDR82	https://www.ensembl.org/id/ENSG00000164091	97.4514	98.2668	88.3155	76.1302	74.156	81.341	99.9434	98.636	96.8859	96.5565	98.1682	98.1808	0.0141953	0.465807	0.355017	0.00777719
MTHFD2	https://www.ensembl.org/id/ENSG00000065911	86.0465	82.1864	99.332	68.1113	68.0209	72.0104	87.0194	86.169	112.072	112.559	113.629	115.4	0.0547501	0.156496	0.59164	3.82273e-05
gene:ENSG00000259171	https://www.ensembl.org/id/ENSG00000259171	84.9192	93.2133	118.259	65.2346	64.7268	64.212	86.7167	88.1198	120.852	102.695	109.135	104.226	0.0765579	0.606506	0.988295	0.00187395
DCTPP1	https://www.ensembl.org/id/ENSG00000179958	140.853	135.664	105.605	75.8385	81.1701	73.3703	99.2711	104.176	75.0033	67.1434	75.4533	68.6951	0.0391741	0.122153	0.07431	0.13846
ATP13A2	https://www.ensembl.org/id/ENSG00000159363	90.5223	88.5206	69.328	102.146	96.7886	103.94	99.4395	100.975	92.8183	85.2294	83.5573	88.5177	0.103799	0.0223959	0.145894	0.00628435
FAM83H	https://www.ensembl.org/id/ENSG00000180921	94.3072	91.7166	70.6951	107.51	99.1094	110.753	101.038	103.068	87.0252	78.1332	76.7509	81.3874	0.0967746	0.0595816	0.281177	0.00849367
SF1	https://www.ensembl.org/id/ENSG00000168066	92.5841	98.7326	89.5132	80.1248	75.0039	81.2073	98.4235	101.738	96.0801	94.8854	92.5764	98.6522	0.0140666	0.234971	0.195294	0.0031868
FABP5	https://www.ensembl.org/id/ENSG00000164687	132.335	128.968	98.0183	48.9607	49.8476	52.9043	114.972	121.584	107.12	78.0719	85.0344	81.6746	0.0229119	0.00656703	0.690414	0.000604514
COA4	https://www.ensembl.org/id/ENSG00000181924	113.227	110.924	97.0249	86.2346	85.7683	87.1167	93.7362	90.8018	81.2187	78.9131	89.9051	84.3823	0.0541542	0.445487	0.0473331	0.598441
GDE1	https://www.ensembl.org/id/ENSG00000006007	90.1023	79.8085	88.8887	95.3265	96.1925	100.716	83.1712	83.5749	97.3304	91.073	95.6801	95.7509	0.0556283	0.317161	0.77382	0.227898
PSMG2	https://www.ensembl.org/id/ENSG00000128789	102.652	98.4822	96.2235	81.2652	82.0206	78.1051	96.0813	97.6292	93.0381	89.7851	92.6531	88.8417	0.00222872	0.0449052	0.208677	0.00389357
SPR	https://www.ensembl.org/id/ENSG00000116096	111.17	103.481	93.3541	89.9319	96.1182	90.2617	86.4256	85.8217	74.9921	83.3388	96.6169	84.6267	0.16666	0.363264	0.0381452	0.467596
PLK3	https://www.ensembl.org/id/ENSG00000173846	51.5281	50.2521	49.6853	260.498	231.462	260.77	29.4096	26.5875	32.8432	35.8336	33.1632	32.8974	0.00228407	0.122262	0.00437149	0.00184605
CNOT8	https://www.ensembl.org/id/ENSG00000155508	81.8437	79.2651	81.8598	87.3082	87.6582	98.5114	92.9815	92.3164	92.8444	100.137	99.6196	100.477	0.102723	2.9852e-05	0.0037175	0.13551
PRKAR1A	https://www.ensembl.org/id/ENSG00000108946	89.7599	91.9143	90.8338	84.7493	78.8044	89.8927	93.432	93.2993	92.8105	95.9959	97.2549	94.7209	0.181931	0.0537224	0.0534301	0.0629767
ANLN	https://www.ensembl.org/id/ENSG00000011426	131.35	130.439	97.1267	11.8933	11.114	13.3465	148.899	149.173	142.202	86.5055	85.9382	85.0041	0.0105901	0.00098775	0.132587	4.61069e-07
ZDHHC7	https://www.ensembl.org/id/ENSG00000153786	94.0398	94.5762	85.9372	87.3773	75.414	89.5369	97.8839	98.2135	90.1394	95.3074	90.9779	93.0619	0.239832	0.491552	0.368366	0.16937
RAB2A	https://www.ensembl.org/id/ENSG00000104388	86.3643	84.2518	89.2121	81.6848	83.511	85.3998	85.5844	86.0476	95.4526	97.7318	109.363	106.768	0.167034	0.0312222	0.545259	0.0195812
LAMB2	https://www.ensembl.org/id/ENSG00000172037	88.1092	93.2303	83.9015	76.9629	63.1313	78.7881	110.187	109.968	106.751	103.376	85.0245	91.8186	0.0686806	0.0952118	0.00862217	0.0489175
NUTF2	https://www.ensembl.org/id/ENSG00000102898	101.332	97.54	94.8056	97.0717	105.306	93.9798	87.7301	91.7012	81.7951	75.5554	83.911	80.4266	0.831843	0.133821	0.0425727	0.0132866
HSD17B11	https://www.ensembl.org/id/ENSG00000198189	101.702	98.3816	92.1926	51.1939	50.4115	52.7555	110.307	108.989	109.261	107.622	103.24	105.073	0.0023293	0.0690151	0.0466283	3.39683e-05
RHEB	https://www.ensembl.org/id/ENSG00000106615	102.476	98.5362	100.209	80.6811	79.7793	82.2665	89.4297	86.9509	97.1239	90.0682	92.8982	90.4101	0.00036679	0.990385	0.0803121	0.00106445
GNE	https://www.ensembl.org/id/ENSG00000159921	89.88	91.2152	92.8843	75.8833	72.6699	82.1464	83.191	82.236	82.3204	111.212	116.65	109.621	0.0265854	0.00435712	0.00515012	0.000735098
ATP6V0D1	https://www.ensembl.org/id/ENSG00000159720	83.5306	81.9121	73.8617	124.048	136.274	125.159	72.3163	73.5682	81.1685	77.0698	78.3832	81.1757	0.000802545	0.374614	0.373085	0.0033845
UAP1	https://www.ensembl.org/id/ENSG00000117143	85.0498	81.7572	94.9663	61.9466	58.4995	66.2644	95.0074	89.9767	106.332	114.004	117.943	116.423	0.0103713	0.0522849	0.193309	0.000236051
OAZ2	https://www.ensembl.org/id/ENSG00000180304	113.303	110.803	100.511	85.9253	87.155	89.8382	97.6031	96.5435	84.7601	71.7462	81.4192	68.1564	0.0265313	0.0283551	0.0552325	0.0629022
TMEM208	https://www.ensembl.org/id/ENSG00000168701	77.8179	82.7436	95.5616	103.695	110.339	102.862	71.1185	70.1027	81.3726	100.976	98.3522	92.1046	0.044829	0.00855152	0.165103	0.0751771
PDCD6IP	https://www.ensembl.org/id/ENSG00000170248	93.7333	91.5644	73.7852	91.405	84.0182	97.6323	98.1327	98.1281	79.876	90.7569	95.2106	92.5239	0.571598	0.910282	0.552341	0.697708
UBE2I	https://www.ensembl.org/id/ENSG00000103275	97.9666	95.2445	96.856	78.9842	79.8991	77.2933	93.9734	90.3247	99.7243	90.0329	94.1635	92.0706	8.25791e-05	0.455716	0.543309	0.00147603
CAVIN3	https://www.ensembl.org/id/ENSG00000170955	115.625	115.214	92.9126	86.7072	90.5854	81.6544	92.0326	94.46	78.1092	75.2974	86.4107	77.1102	0.08971	0.243958	0.104656	0.19955
ERBB2	https://www.ensembl.org/id/ENSG00000141736	100.548	95.0845	81.1683	66.7187	66.6099	69.7945	102.939	108.161	93.9431	100.03	98.7819	102.263	0.0470246	0.783473	0.262517	2.36776e-05
PRSS21	https://www.ensembl.org/id/ENSG00000007038	112.498	110.987	100.999	75.7491	71.9911	71.4724	94.6021	91.8465	93.4697	85.1366	86.0237	90.4931	0.00520996	0.0481571	0.0483866	0.00311108
SLC3A2	https://www.ensembl.org/id/ENSG00000168003	92.6331	74.4128	89.8286	61.689	60.0546	63.0088	96.1738	95.3187	99.4376	116.765	118.619	117.071	0.0484411	0.000949947	0.178041	3.02003e-06
ZNF146	https://www.ensembl.org/id/ENSG00000167635	96.248	105.995	94.5646	79.7217	69.8226	83.8446	96.7098	94.2606	81.1922	96.4596	94.4344	90.4839	0.0189726	0.598507	0.247879	0.0455182
MRPL38	https://www.ensembl.org/id/ENSG00000204316	95.1933	99.0227	84.9077	99.4416	89.0763	99.5519	81.7397	86.8465	74.6259	92.8627	94.1013	85.7752	0.615076	0.0946328	0.0973896	0.30867
FAM50A	https://www.ensembl.org/id/ENSG00000071859	76.8343	90.5471	72.2195	141.12	122.372	128.861	72.8749	72.6172	66.4186	87.4112	75.9825	74.8583	0.00281574	0.147175	0.229843	0.0023369
GLRX5	https://www.ensembl.org/id/ENSG00000182512	102.801	96.2264	99.6626	81.6512	81.2878	79.325	91.8174	86.278	88.947	87.4116	94.0361	92.5949	0.00486478	0.417655	0.0139848	0.0237736
CAPRIN1	https://www.ensembl.org/id/ENSG00000135387	90.8433	86.5593	74.2414	81.621	79.2493	90.2597	98.4097	97.3575	91.2646	94.4281	97.2706	100.372	0.978759	0.58441	0.126589	0.0363191
CCDC47	https://www.ensembl.org/id/ENSG00000108588	96.3846	97.4421	84.5024	81.6101	78.2909	87.2175	94.7744	94.3424	83.9094	93.1963	97.6646	92.2925	0.113868	0.455922	0.762764	0.0240731
GARS1	https://www.ensembl.org/id/ENSG00000106105	81.9335	76.2565	95.0295	61.9902	59.2713	64.2246	88.541	86.823	119.64	114.823	112.38	120.687	0.0480017	0.236614	0.330315	0.000207558
EMC4	https://www.ensembl.org/id/ENSG00000128463	92.4693	87.7841	83.3994	97.2652	94.0264	90.7937	89.5477	87.013	81.4812	91.4587	97.3334	88.8753	0.136252	0.13137	0.625435	0.663684
KRT13	https://www.ensembl.org/id/ENSG00000171401	166.257	158.345	138.752	48.0355	46.3212	49.1667	107.396	107.547	90.8405	56.944	58.6253	51.9346	0.00544464	0.00792725	0.00856195	0.0424991
OCIAD1	https://www.ensembl.org/id/ENSG00000109180	97.0963	107.041	82.824	101.972	83.0903	100.007	93.6103	93.9803	76.556	84.3009	82.7473	76.2207	0.948916	0.354722	0.451089	0.132182
PYCARD	https://www.ensembl.org/id/ENSG00000103490	84.5654	84.3998	73.0571	113.295	117.583	107.55	92.8438	87.0632	82.5722	74.9528	78.2517	82.9201	0.00326089	0.0839845	0.234965	0.000982611
CREB3	https://www.ensembl.org/id/ENSG00000107175	84.8849	81.8062	86.8499	83.6788	79.8705	83.2356	95.0415	93.7826	88.5173	99.0185	96.3012	105.864	0.30329	0.0918812	0.0371513	0.0132477
FOSL2	https://www.ensembl.org/id/ENSG00000075426	76.5808	74.0685	79.9854	113.511	108.279	123.524	83.3889	82.2537	74.3829	86.8068	87.0634	88.5603	0.00697834	0.113837	0.408448	0.0238176
MMP7	https://www.ensembl.org/id/ENSG00000137673	80.2879	78.7972	65.6245	48.8037	58.3472	58.1575	103.901	114.501	82.7836	122.775	142.654	121.682	0.0302108	0.0739732	0.0937314	0.00288876
NBR1	https://www.ensembl.org/id/ENSG00000188554	86.719	86.4173	80.1286	96.0505	86.0778	102.489	88.2501	87.6571	80.0649	94.3986	97.2716	91.6383	0.1471	0.0530506	0.804298	0.937635
VPS4B	https://www.ensembl.org/id/ENSG00000119541	83.7587	87.8041	65.8467	115.711	103.566	127.44	82.5869	89.688	65.0644	86.8663	85.0462	83.7574	0.019489	0.492172	0.998241	0.0457808
NPC2	https://www.ensembl.org/id/ENSG00000119655	95.35	91.4989	102.944	54.2894	57.0399	53.482	114.862	115.988	130.481	83.8204	91.7803	85.5091	0.00346782	0.010476	0.0219676	0.0017856
DDB1	https://www.ensembl.org/id/ENSG00000167986	90.0974	79.039	65.2575	100.886	102.359	107.177	86.3802	86.7907	78.9321	89.1718	92.11	96.9399	0.0634026	0.0641317	0.505445	0.0232953
MRPL16	https://www.ensembl.org/id/ENSG00000166902	122.729	136.815	104.982	69.3488	57.7774	70.6156	101.631	103.171	83.0358	79.5006	75.7591	68.6815	0.0145822	0.0620838	0.0932839	0.170931
UBE2C	https://www.ensembl.org/id/ENSG00000175063	116.627	110.701	125.886	9.43013	10.4573	9.58343	115.026	124.592	170.962	93.4193	95.8724	91.1964	0.00159403	0.127873	0.384507	0.000128146
RRM2B	https://www.ensembl.org/id/ENSG00000048392	46.4095	48.3418	44.0016	262.176	245.667	293.595	19.5302	19.3314	17.9436	25.8628	25.4029	25.178	0.00379434	0.00217905	0.000601753	0.00336098
CHMP4A	https://www.ensembl.org/id/ENSG00000254505	79.8268	91.657	76.9367	122.329	123.168	111.707	77.6957	74.7528	62.4277	80.7256	87.9843	84.033	0.0038347	0.0976016	0.160223	0.00307425
ALKBH5	https://www.ensembl.org/id/ENSG00000091542	92.3747	91.8082	97.4774	74.7333	75.5174	76.7422	96.397	94.3958	100.537	86.9106	94.4056	91.5664	0.00554666	0.0983861	0.275421	0.0148176
REXO2	https://www.ensembl.org/id/ENSG00000076043	77.4886	85.6132	70.3048	146.336	129.963	129.623	76.15	76.7661	61.2792	72.9975	75.172	70.9769	0.00150892	0.778496	0.395616	0.00582351
TSC22D1	https://www.ensembl.org/id/ENSG00000102804	93.0656	93.1232	89.6112	78.3424	79.9981	86.89	98.6947	99.8507	94.0344	87.2247	88.1886	82.6852	0.0432874	0.00951839	0.0675951	0.252067
BBC3	https://www.ensembl.org/id/ENSG00000105327	63.0222	59.7735	75.7928	165.467	141.404	156.779	56.6716	53.4637	69.7181	77.847	73.8068	76.5222	0.000881839	0.0762212	0.421048	0.00669154
LRP10	https://www.ensembl.org/id/ENSG00000197324	76.0007	71.7666	68.1962	99.2527	95.9728	101.23	90.2722	93.0053	97.8064	89.4671	91.2998	95.8327	0.00109957	0.634368	0.00233612	0.0555679
ZNF664	https://www.ensembl.org/id/ENSG00000179195	94.8413	108.637	76.9594	96.3302	73.4594	91.9373	95.7385	99.0158	72.1706	90.7238	86.9923	82.9938	0.61945	0.832372	0.736389	0.966786
MRPL33	https://www.ensembl.org/id/ENSG00000243147	88.1649	88.8845	88.2471	106.334	106.055	110.683	81.3247	77.9308	75.8673	84.4107	80.6314	81.2611	0.0051577	0.138452	0.022282	0.00024891
FAM120A	https://www.ensembl.org/id/ENSG00000048828	96.0582	93.8288	76.0686	82.8719	75.5086	86.6392	92.6082	93.8994	79.8099	95.478	98.3569	97.8107	0.399305	0.19763	0.988418	0.0340907
NRBP1	https://www.ensembl.org/id/ENSG00000115216	93.0455	88.8365	87.3579	93.6582	95.9902	99.8082	81.9648	80.806	84.9369	84.7408	90.2958	87.3923	0.0528661	0.0764735	0.0311688	0.0204711
AFG3L2	https://www.ensembl.org/id/ENSG00000141385	99.3805	94.9315	78.92	77.0017	73.241	80.9745	98.2153	98.6123	84.5384	92.3267	95.1802	95.245	0.14158	0.930408	0.745346	0.00799999
UFM1	https://www.ensembl.org/id/ENSG00000120686	69.1718	76.9912	84.0796	97.7016	81.8024	103.574	82.8353	84.577	83.4825	110.049	97.9999	95.8045	0.0970587	0.055796	0.249905	0.434624
EML2	https://www.ensembl.org/id/ENSG00000125746	56.838	55.5589	58.86	136.614	135.796	137.215	57.826	57.6167	59.8931	104.9	102.565	103.356	1.37346e-05	1.48415e-06	0.326469	1.46907e-05
CLK1	https://www.ensembl.org/id/ENSG00000013441	70.2431	102.265	88.8278	77.8282	34.3546	71.9561	97.9693	108.331	87.1286	135.573	98.3068	94.2125	0.202794	0.487326	0.398308	0.0644642
ABCE1	https://www.ensembl.org/id/ENSG00000164163	108.63	107.786	82.7371	66.2218	63.2266	74.5646	101.183	102.463	80.0548	91.3368	94.6218	93.3293	0.0497041	0.858915	0.66941	0.0127357
ZYX	https://www.ensembl.org/id/ENSG00000159840	90.5431	83.9959	86.918	91.0741	92.1907	85.8605	81.514	86.9692	94.1434	87.0798	89.3152	95.9823	0.400397	0.51617	0.93055	0.761156
NME1	https://www.ensembl.org/id/ENSG00000239672	89.564	84.9144	57.1134	169.127	181.372	163.998	61.3813	60.8877	49.5269	47.8204	51.0941	48.4484	0.00380812	0.163416	0.178505	0.00126235
CKLF	https://www.ensembl.org/id/ENSG00000217555	103.86	103.892	97.8224	68.3282	71.688	66.6392	90.3816	89.5598	85.1413	98.6138	92.0397	96.6012	0.000317702	0.0451282	0.00730926	0.000556865
ESRP1	https://www.ensembl.org/id/ENSG00000104413	82.8937	77.5523	80.879	56.0021	51.6039	59.9318	99.4957	101.098	108.99	116.457	111.99	117.125	0.00196297	0.0351553	0.00608062	9.11877e-05
SRRM1	https://www.ensembl.org/id/ENSG00000133226	87.2861	95.9586	90.2395	70.0067	59.6148	76.8731	92.9914	91.5598	86.3985	110.874	105.902	96.2085	0.0291834	0.0646021	0.807756	0.00619618
SNRPE	https://www.ensembl.org/id/ENSG00000182004	117.24	116.999	104.858	71.63	77.7599	73.5022	94.3145	92.0283	86.689	74.557	82.4256	71.5346	0.00444192	0.0244114	0.016561	0.647365
MRPS2	https://www.ensembl.org/id/ENSG00000122140	108.352	102.444	90.4677	78.2397	81.4292	74.0154	95.738	99.2091	89.8411	82.4892	80.5785	80.696	0.0359408	0.0324652	0.422476	0.254328
FAM207A	https://www.ensembl.org/id/ENSG00000160256	96.4945	93.1791	88.6367	95.9161	102.355	91.4302	87.2745	85.7415	79.8943	79.7893	80.9096	81.8622	0.390982	0.261491	0.0572647	0.0345229
SYTL1	https://www.ensembl.org/id/ENSG00000142765	55.3604	77.2771	56.502	198.931	148.979	168.654	57.6788	61.6592	55.4424	74.4402	53.5357	54.4951	0.00732929	0.747172	0.57499	0.00731487
MCU	https://www.ensembl.org/id/ENSG00000156026	91.5664	93.7644	92.6343	72.4535	68.0055	77.1369	92.3467	91.6383	98.2601	92.2293	95.6527	97.152	0.0129546	0.736513	0.57295	0.00436062
RNF187	https://www.ensembl.org/id/ENSG00000168159	98.5918	92.1197	84.7498	95.2276	93.9598	93.7303	88.7968	86.4359	85.9874	76.8689	85.0141	81.3526	0.598436	0.112711	0.356894	0.0265228
PLIN3	https://www.ensembl.org/id/ENSG00000105355	90.869	85.4059	89.0083	89.7514	91.7897	89.5796	84.0229	87.6645	91.5498	84.4538	87.9939	90.2586	0.354548	0.952001	0.814112	0.233604
TRABD	https://www.ensembl.org/id/ENSG00000170638	94.5483	108.141	94.5407	96.2247	76.6659	90.3533	81.9721	86.2919	79.9915	97.0293	77.9432	78.3862	0.202456	0.816376	0.0533543	0.719748
LGR4	https://www.ensembl.org/id/ENSG00000205213	85.2117	86.7945	76.7598	64.5027	57.4044	67.9578	103.452	101.778	93.1441	109.267	105.273	108.641	0.0111334	0.108315	0.0207376	0.0017742
CAT	https://www.ensembl.org/id/ENSG00000121691	101.158	94.4287	84.4403	72.4811	66.5769	74.2211	96.7935	96.9881	93.4845	92.4961	92.8491	93.4118	0.0280607	0.123372	0.67211	0.0102826
ARPC5	https://www.ensembl.org/id/ENSG00000162704	96.9416	99.1399	83.4539	90.6182	94.8576	94.7021	89.707	89.7325	74.4633	80.2889	83.3825	81.0315	0.969827	0.60989	0.29316	0.00343493
MGST1	https://www.ensembl.org/id/ENSG00000008394	111.057	122.841	97.3339	39.4825	38.474	40.1122	116.816	121.575	98.642	90.2659	91.8152	87.6819	0.010347	0.0808668	0.858286	0.000110003
KCNN4	https://www.ensembl.org/id/ENSG00000104783	91.6596	87.9474	83.3605	110.469	102.506	106.05	81.5095	79.3747	74.8109	80.5815	79.4506	77.4417	0.0049619	0.804184	0.045014	0.00292424
PPP1R11	https://www.ensembl.org/id/ENSG00000204619	86.572	78.4002	75.3646	85.6512	82.472	85.3309	86.5089	81.7365	82.133	101.719	106.645	102.148	0.320648	0.000801845	0.434365	0.00114965
COTL1	https://www.ensembl.org/id/ENSG00000103187	131.319	127.313	102.663	82.5676	81.3627	77.6162	83.8096	79.6456	72.33	69.5196	75.1856	71.3178	0.0435612	0.179138	0.0306923	0.0195856
STAT6	https://www.ensembl.org/id/ENSG00000166888	73.3268	83.577	67.6667	121.322	99.8759	123.835	82.663	89.6711	68.2402	85.8501	77.1561	81.0621	0.0164615	0.876205	0.536661	0.0367401
PPP6R1	https://www.ensembl.org/id/ENSG00000105063	78.4883	76.2031	69.3796	89.2495	84.3371	92.7496	86.465	87.6121	81.2998	100.178	99.227	108.474	0.0188599	0.0109942	0.0412481	0.0235123
UBE2E1	https://www.ensembl.org/id/ENSG00000170142	94.6115	102.547	80.3401	80.6825	74.7251	81.8468	97.4238	96.531	77.8131	88.9703	95.5538	82.3672	0.165593	0.84004	0.84426	0.10466
COX16	https://www.ensembl.org/id/ENSG00000133983	94.8372	103.189	92.4342	85.912	88.555	84.9165	86.9719	89.0868	87.3215	80.142	81.8511	77.8768	0.0740797	0.00822879	0.104071	0.0148235
ENDOD1	https://www.ensembl.org/id/ENSG00000149218	82.9875	80.9206	72.364	99.9234	93.4947	99.3519	88.1101	88.4603	81.8399	89.6148	87.7995	87.3919	0.0122974	0.429917	0.142187	0.0347044
PPL	https://www.ensembl.org/id/ENSG00000118898	96.1823	95.604	72.5606	52.6709	48.4771	57.2757	117.612	118.749	98.3887	95.8587	96.1538	102.082	0.0349628	0.168436	0.08472	0.000208379
HINT2	https://www.ensembl.org/id/ENSG00000137133	96.7546	93.1491	81.3837	93.5501	99.8764	92.8641	80.9719	84.3312	86.5539	74.3103	81.9509	83.8318	0.405847	0.320989	0.296136	0.015726
SMIM22	https://www.ensembl.org/id/ENSG00000267795	92.6356	89.8371	87.6885	104.7	119.218	104.769	74.2394	69.9066	74.7022	76.0032	78.6175	77.1765	0.046554	0.0873675	0.00124412	0.0195706
PHC2	https://www.ensembl.org/id/ENSG00000134686	91.5207	90.2067	81.7896	87.8439	82.0224	87.1613	81.753	83.7063	82.6918	91.9746	93.8493	93.7252	0.582833	0.000231514	0.232331	0.0438371
EIF3J	https://www.ensembl.org/id/ENSG00000104131	100.419	102.61	91.9217	86.8287	86.4893	90.0027	88.3002	85.3286	71.672	82.9628	81.1179	80.4451	0.0709559	0.96456	0.0629991	0.0132479
TVP23B	https://www.ensembl.org/id/ENSG00000171928	72.8298	77.0044	86.4319	85.6649	83.0517	87.7821	80.7537	77.8005	85.617	102.355	107.438	101.057	0.230116	0.00193864	0.606709	0.00244634
THOC7	https://www.ensembl.org/id/ENSG00000163634	100.59	105.931	90.5205	73.8483	80.8898	72.6174	91.1564	94.2993	82.7527	85.5747	90.8914	78.4407	0.0185087	0.424456	0.171001	0.114323
PTPN11	https://www.ensembl.org/id/ENSG00000179295	84.8658	88.5624	72.9138	86.9396	77.71	93.9238	89.4404	91.69	77.7636	94.2517	94.4517	94.4867	0.573471	0.201399	0.549082	0.222629
H2AX	https://www.ensembl.org/id/ENSG00000188486	140.28	140.322	118.721	44.743	45.4102	45.5358	103.755	105.864	112.579	64.0358	62.7213	62.5774	0.00658426	0.00285347	0.0562473	4.98906e-05
STARD4	https://www.ensembl.org/id/ENSG00000164211	59.1862	79.6671	61.6583	78.7594	57.1363	84.7541	104.282	107.746	83.0791	126.196	103.408	99.5488	0.562486	0.37384	0.0364797	0.037571
ITPR3	https://www.ensembl.org/id/ENSG00000096433	72.5516	70.1686	59.2051	70.0273	59.9646	78.5286	103.286	101.037	102.45	107.437	104.974	115.679	0.762315	0.154636	0.0119385	0.00595019
API5	https://www.ensembl.org/id/ENSG00000166181	99.7331	104.794	72.2502	84.2137	77.2603	91.2513	95.7507	99.5161	71.1302	82.9055	84.6491	81.7051	0.521797	0.587293	0.810154	0.803974
POLR2B	https://www.ensembl.org/id/ENSG00000047315	87.1699	92.0106	72.2364	80.5504	70.0331	88.1178	97.7194	97.5519	84.4495	89.3276	91.9153	92.3817	0.621824	0.692273	0.276748	0.152692
MRPL45	https://www.ensembl.org/id/ENSG00000278845	93.511	90.2515	87.3153	74.1073	75.7639	77.3091	92.2381	93.9762	92.4386	88.1775	93.9309	83.8983	0.00540125	0.282378	0.291579	0.0368709
PSME2	https://www.ensembl.org/id/ENSG00000100911	67.9776	69.4187	55.1309	132.975	138.327	142.288	62.0278	62.7527	56.7534	85.428	85.9183	82.9341	0.000514556	0.00163089	0.516357	0.00103513
STX4	https://www.ensembl.org/id/ENSG00000103496	78.5665	86.5687	87.9076	84.8446	78.7139	85.8113	87.6208	86.401	83.8441	97.8828	87.4834	96.1628	0.756323	0.122078	0.647473	0.0590696
SAFB	https://www.ensembl.org/id/ENSG00000160633	96.9943	98.7368	84.255	78.7377	72.1412	79.4293	94.5142	94.6144	86.5815	84.2203	84.8192	85.3365	0.0487711	0.114081	0.803726	0.071909
GTF3C6	https://www.ensembl.org/id/ENSG00000155115	102.135	108.06	85.4834	89.9558	100.178	83.8264	84.0946	86.5048	72.8208	68.9472	83.0779	74.8285	0.436006	0.400915	0.107151	0.0683861
UBE2K	https://www.ensembl.org/id/ENSG00000078140	90.7041	95.7844	83.6855	76.3668	71.9525	78.2092	94.3525	94.5876	83.5326	87.3145	91.8295	91.1353	0.0343502	0.865288	0.886973	0.00419073
CDK1	https://www.ensembl.org/id/ENSG00000170312	126.623	125.024	114.791	10.3957	10.8332	12.9422	122.014	121.098	141.285	83.3825	86.4622	84.1063	0.000719883	0.0204355	0.483357	6.32313e-07
WNT7B	https://www.ensembl.org/id/ENSG00000188064	76.3711	71.9391	74.5896	114.834	112.985	118.891	63.2922	64.4121	66.9775	88.8113	91.473	94.0829	8.21866e-05	0.000262256	0.00549198	0.000526572
PRPF6	https://www.ensembl.org/id/ENSG00000101161	97.6963	91.7983	83.0269	80.2426	82.1141	80.0067	95.0794	92.7408	84.6373	82.7967	84.5584	82.156	0.139197	0.130649	0.997006	0.072227
RNASE1	https://www.ensembl.org/id/ENSG00000129538	105.278	97.8904	88.9076	162.692	184.896	164.729	48.5233	51.7853	42.7677	27.6866	32.6301	28.9933	0.00180011	0.00837682	0.00230495	0.00176179
OGA	https://www.ensembl.org/id/ENSG00000198408	79.2508	89.668	79.216	72.4125	56.8848	73.1029	102.031	102.392	82.9051	102.771	96.2892	98.3841	0.0839774	0.65868	0.169841	0.0175683
TAF13	https://www.ensembl.org/id/ENSG00000197780	68.2305	66.4622	80.7047	99.7403	99.0129	110.979	65.7981	63.8437	75.443	96.9257	105.787	102.353	0.00641475	0.00240549	0.582957	0.757325
MDK	https://www.ensembl.org/id/ENSG00000110492	89.0393	96.8217	94.2791	80.0211	76.2426	71.3154	77.8186	76.0419	82.1641	96.3042	101.104	93.7974	0.00694018	0.00308881	0.00837882	0.00331859
BACE2	https://www.ensembl.org/id/ENSG00000182240	95.5495	91.4572	88.9836	79.5457	79.0599	80.0311	102.06	102.692	107.317	65.4011	71.9907	70.85	0.0209688	0.000242085	0.00943289	0.0358552
FARSA	https://www.ensembl.org/id/ENSG00000179115	95.6732	89.7761	73.6297	99.0485	98.2507	96.5845	80.5124	86.9772	73.4654	79.0748	79.5235	81.655	0.219203	0.958135	0.483672	8.18442e-05
CLPTM1	https://www.ensembl.org/id/ENSG00000104853	87.5457	78.0949	75.9665	78.926	83.1251	81.9901	90.3804	90.9845	93.169	86.624	92.618	94.3214	0.846103	0.906033	0.0837787	0.0327246
PIN1	https://www.ensembl.org/id/ENSG00000127445	95.6167	98.6006	87.0859	89.4674	87.669	84.7663	83.2999	81.3654	80.4397	77.2722	88.4194	79.5985	0.193165	0.987366	0.0655351	0.239677
PKDCC	https://www.ensembl.org/id/ENSG00000162878	133.995	163.052	133.915	78.5539	52.4962	78.1359	82.7536	81.6205	66.3918	60.13	51.8372	50.1507	0.00488699	0.029346	0.008355	0.202774
GNS	https://www.ensembl.org/id/ENSG00000135677	93.1604	87.5848	73.2867	80.2606	81.0359	88.7219	90.3511	89.1682	79.7891	86.6794	90.5425	92.0655	0.85111	0.438145	0.811757	0.12623
SSH3	https://www.ensembl.org/id/ENSG00000172830	73.8493	80.2002	62.0781	104.712	91.0014	101.578	82.8328	84.6853	75.2096	95.1192	87.7721	93.083	0.0178083	0.0418094	0.23625	0.226012
ZNF511	https://www.ensembl.org/id/ENSG00000198546	108.393	105.849	107.722	66.1821	57.3745	60.5699	91.1294	95.3162	97.3539	84.9551	80.5651	76.5174	0.00161578	0.0122234	0.0108298	0.0055684
TMEM106C	https://www.ensembl.org/id/ENSG00000134291	114.733	116.428	90.5139	76.0474	72.9236	78.3584	90.4757	93.4383	82.8534	72.0662	72.7353	71.0867	0.0595477	0.0304592	0.14889	0.126644
CRK	https://www.ensembl.org/id/ENSG00000167193	82.9955	86.1581	85.5457	78.7066	72.0907	80.9392	88.392	88.2245	89.7428	91.8638	93.9343	90.3712	0.088602	0.0687405	0.0383553	0.0197258
EMP3	https://www.ensembl.org/id/ENSG00000142227	87.8014	85.8134	96.201	41.5597	43.539	38.2323	105.896	101.856	119.959	99.5295	106.611	100.59	0.000987989	0.332752	0.0510749	5.27683e-05
SEC24C	https://www.ensembl.org/id/ENSG00000176986	73.0465	79.4386	71.5985	102.109	91.7016	102.595	80.3201	83.7552	75.2145	90.6073	84.2878	90.2799	0.00718553	0.0573364	0.216633	0.0796482
C4orf48	https://www.ensembl.org/id/ENSG00000243449	98.2226	86.3348	89.8194	91.4757	95.5522	78.8208	78.544	73.0483	86.0399	86.6627	78.2347	81.8692	0.670578	0.540407	0.076783	0.341173
RBM8A	https://www.ensembl.org/id/ENSG00000265241	100.345	101.787	83.0456	86.334	85.096	89.4953	92.8894	91.5015	82.9341	68.8522	73.6037	68.6642	0.310211	0.0127757	0.444656	0.00159017
NDUFS8	https://www.ensembl.org/id/ENSG00000110717	73.7891	70.3093	70.1789	107.928	114.516	102.503	62.838	65.8043	66.068	92.8489	97.7172	99.674	0.00468033	0.000827327	0.0147763	0.0585052
F2RL1	https://www.ensembl.org/id/ENSG00000164251	74.0537	65.4962	67.2794	61.5236	59.8279	63.9913	98.2501	98.2598	115.237	106.072	106.599	107.364	0.0936001	0.674072	0.013276	0.000266655
RAB20	https://www.ensembl.org/id/ENSG00000139832	103.73	105.083	98.6765	65.8314	71.8808	67.369	88.7917	85.0806	82.4544	83.7692	86.4554	84.5918	0.000220242	0.819283	0.00316094	0.00499548
ORMDL3	https://www.ensembl.org/id/ENSG00000172057	88.7094	88.0479	108.013	87.3436	81.1479	82.3882	72.103	67.1134	80.2671	91.0702	90.8437	86.1359	0.221318	0.0366436	0.0588051	0.0842669
PIP4P1	https://www.ensembl.org/id/ENSG00000165782	70.0184	69.6561	85.3969	70.5827	61.57	64.6642	78.6639	84.5808	105.73	119.898	106.25	105.982	0.204997	0.107364	0.219163	0.00267724
GLB1	https://www.ensembl.org/id/ENSG00000170266	83.5112	72.0973	66.3039	79.5825	86.3645	88.7301	84.7987	88.4609	89.8845	88.6901	95.7212	98.3244	0.151267	0.137322	0.102585	0.0783791
TMEM183A	https://www.ensembl.org/id/ENSG00000163444	81.2881	75.4754	76.9008	89.4942	88.9366	91.3876	79.0591	76.5715	80.0569	91.8351	96.4989	94.5008	0.0108237	0.00103481	0.760362	0.0643754
PRR15	https://www.ensembl.org/id/ENSG00000176532	110.364	107.91	103.437	42.1198	39.9111	40.1482	106.773	108.375	105.693	81.1244	85.0047	91.0287	0.000290193	0.0131666	0.90346	0.00267183
VPS29	https://www.ensembl.org/id/ENSG00000111237	104.465	115	91.4669	69.609	63.7368	68.2332	93.2252	97.9134	76.4882	82.2967	80.4927	76.9215	0.0268275	0.286625	0.200073	0.00609731
SNRPG	https://www.ensembl.org/id/ENSG00000143977	109.817	109.116	95.3668	79.3842	80.1163	84.042	80.0083	83.5118	78.1161	79.9226	69.9668	70.2329	0.0288524	0.146859	0.0260087	0.125371
SEMA4G	https://www.ensembl.org/id/ENSG00000095539	88.8619	91.7718	74.804	70.2497	60.178	72.3816	93.277	94.7797	83.4182	97.478	96.0242	96.3507	0.0588949	0.226373	0.452253	0.0154005
REEP6	https://www.ensembl.org/id/ENSG00000115255	89.5569	87.4866	86.7822	78.6198	77.6462	71.7584	80.9606	77.7145	84.5945	90.5523	94.0813	99.6124	0.0197982	0.0167405	0.0584256	0.00593964
IDH3B	https://www.ensembl.org/id/ENSG00000101365	88.6578	89.525	79.2558	79.4284	75.6318	77.1869	91.2525	90.3131	83.1375	88.294	90.9526	85.6575	0.113529	0.98339	0.594247	0.00594622
CCNB1	https://www.ensembl.org/id/ENSG00000134057	116.484	107.824	88.5524	13.1151	13.7463	12.9968	127.518	121.435	140.32	93.4609	93.742	89.8995	0.00808967	0.0176159	0.0713687	0.000155061
SCYL1	https://www.ensembl.org/id/ENSG00000142186	74.8626	68.1948	73.7217	81.0531	77.5338	82.7916	81.4363	79.2661	88.2564	102.55	101.365	107.979	0.0370975	0.00440811	0.0378755	0.00107189
RANBP1	https://www.ensembl.org/id/ENSG00000099901	125.771	127.227	90.8237	64.5686	66.8019	65.3967	93.2938	97.0998	80.4353	67.3623	71.0967	68.5744	0.0537819	0.0462819	0.166569	0.0690837
PITPNB	https://www.ensembl.org/id/ENSG00000180957	91.9627	103.095	82.019	68.4539	60.1488	73.5183	95.0474	102.06	83.7838	88.4106	83.1196	86.7292	0.0334533	0.289973	0.882825	0.0276869
ATXN2L	https://www.ensembl.org/id/ENSG00000168488	71.7434	73.3265	68.1262	87.289	73.446	86.9022	84.5539	85.9156	85.663	103.203	94.9786	102.772	0.116043	0.0280852	0.00780585	0.0388829
RUVBL2	https://www.ensembl.org/id/ENSG00000183207	107.064	97.7123	77.3316	67.4405	67.8824	71.1725	93.6681	94.1474	90.6999	80.4811	89.3379	80.3212	0.100373	0.0727751	0.90437	0.0268132
CDK7	https://www.ensembl.org/id/ENSG00000134058	68.5295	68.5113	73.1093	61.893	59.1973	63.6821	93.0549	86.9547	94.7342	116.135	116.707	114.044	0.0143244	0.00515589	0.00287135	2.04873e-05
PAK1	https://www.ensembl.org/id/ENSG00000149269	79.9287	73.6761	68.5902	67.9244	65.5317	73.0425	84.4543	80.6679	86.773	110.918	110.823	113.742	0.265647	0.000733476	0.0745434	0.000674037
RPL7L1	https://www.ensembl.org/id/ENSG00000146223	95.6706	99.6926	75.2209	95.4057	85.0326	96.4267	84.708	90.4163	71.5414	72.5611	77.2208	72.0256	0.820012	0.273452	0.448634	0.0227089
TAPBP	https://www.ensembl.org/id/ENSG00000231925	74.1759	74.6731	83.1634	50.4501	44.672	51.1616	103.543	109.081	105.799	107.421	102.279	109.395	0.0020442	0.937177	0.00281674	4.10511e-05
CNPY3	https://www.ensembl.org/id/ENSG00000137161	96.4251	87.7055	87.3436	81.1526	83.8648	74.3612	84.5677	85.6029	83.5417	78.8795	83.6423	88.2589	0.0595609	0.755503	0.180155	0.386619
PLPBP	https://www.ensembl.org/id/ENSG00000147471	81.0689	81.537	79.9362	76.5932	77.1458	77.7745	81.3314	81.0514	81.9173	97.3748	101.09	98.0974	0.00451059	0.00295968	0.355255	0.00135911
BZW2	https://www.ensembl.org/id/ENSG00000136261	95.5812	95.8517	80.9522	67.2664	71.1384	69.1405	92.2694	92.1054	85.0038	88.8222	91.5498	84.9659	0.0422966	0.683933	0.866794	0.00239497
PREB	https://www.ensembl.org/id/ENSG00000138073	78.8364	76.2923	75.5639	112.145	107.622	112.181	68.5206	68.6822	65.2691	81.959	81.4711	85.2199	0.000137859	0.000693602	0.00336055	0.000191748
ENOPH1	https://www.ensembl.org/id/ENSG00000145293	91.0743	90.6775	75.2645	106.26	103.104	107.437	74.3453	71.9426	61.0472	76.9744	80.199	74.8851	0.0545789	0.171663	0.0701445	0.000181952
SUN2	https://www.ensembl.org/id/ENSG00000100242	74.3237	71.0858	76.8707	57.2188	54.4316	57.3851	96.0752	98.2414	112.045	101.923	106.464	107.017	0.00212995	0.61528	0.0214884	6.91606e-05
CRABP2	https://www.ensembl.org/id/ENSG00000143320	108.849	104.931	117.644	79.1797	81.7823	78.8986	58.2228	62.8331	73.5435	79.09	85.1807	82.5133	0.0112446	0.047354	0.00172281	0.329303
BTG2	https://www.ensembl.org/id/ENSG00000159388	59.1858	57.8134	49.8218	221.069	190.234	221.846	33.6385	29.2705	32.3278	44.7062	34.7762	36.7652	0.00259181	0.13357	0.00660049	0.00196036
C5orf15	https://www.ensembl.org/id/ENSG00000113583	89.5333	91.515	85.0921	75.7366	72.5263	82.7728	87.4697	94.04	77.877	87.7122	84.6053	82.2695	0.039469	0.772168	0.690469	0.104575
UBE2B	https://www.ensembl.org/id/ENSG00000119048	71.994	72.1685	84.2371	74.776	71.1074	72.0079	89.674	89.756	97.5671	95.3481	96.6154	95.6978	0.482094	0.306555	0.0359603	0.00087586
CITED4	https://www.ensembl.org/id/ENSG00000179862	91.3674	85.3737	80.2112	143.459	136.893	131.481	65.986	71.5136	52.7583	45.2715	55.6412	49.0431	0.000411632	0.121495	0.0367181	5.18078e-05
TMX2	https://www.ensembl.org/id/ENSG00000213593	97.0622	95.4121	78.0451	75.5459	80.5864	81.5405	81.4794	88.4771	79.969	83.4677	85.5967	80.9216	0.207368	0.994976	0.383279	0.155543
SELENOK	https://www.ensembl.org/id/ENSG00000113811	78.2618	74.0927	82.4033	101.369	105.273	107.791	77.4007	70.3297	75.5454	81.4707	80.1362	73.9774	0.00122692	0.260783	0.298593	0.0010892
MRPL17	https://www.ensembl.org/id/ENSG00000158042	92.5666	87.0616	81.6048	80.6157	82.8181	75.2459	85.6244	79.2916	79.2493	85.9653	91.0581	86.6311	0.132523	0.0753411	0.219427	0.0448155
CAV2	https://www.ensembl.org/id/ENSG00000105971	103.536	105.104	87.6819	69.5326	62.3641	70.6892	106.703	107.667	82.121	71.2008	74.2336	66.0342	0.0168182	0.0673932	0.99582	0.4499
CSNK1D	https://www.ensembl.org/id/ENSG00000141551	80.3288	80.4425	77.6024	85.1645	79.7531	86.9506	85.6596	83.9674	84.8848	86.1719	88.1158	87.7822	0.161744	0.0331222	0.0140132	0.252956
CD44	https://www.ensembl.org/id/ENSG00000026508	75.2519	70.1301	63.2572	67.9649	67.7565	75.9598	109.539	109.543	109.392	85.0432	85.7887	86.8997	0.829722	0.000474103	0.00747311	0.0258036
LRP5	https://www.ensembl.org/id/ENSG00000162337	73.9569	70.3235	56.6992	110.192	97.5324	115.428	71.5871	75.6345	67.0259	87.4542	86.3067	93.296	0.005504	0.00624779	0.504593	0.0563186
CDC26	https://www.ensembl.org/id/ENSG00000176386	87.5788	87.7749	95.6856	71.1433	66.9317	65.9164	80.9334	78.2615	86.4998	90.024	99.9963	94.2787	0.00414234	0.0282817	0.079848	0.00338811
COASY	https://www.ensembl.org/id/ENSG00000068120	92.77	90.817	76.733	97.1327	92.7017	95.4348	77.0243	75.3737	70.5322	79.3495	78.6645	77.5443	0.237481	0.155901	0.118979	0.00226884
PRXL2B	https://www.ensembl.org/id/ENSG00000157870	94.7924	101.06	72.7797	91.3987	79.4231	90.1619	86.9111	92.9207	59.4475	83.1781	76.0282	75.9315	0.804848	0.90707	0.507145	0.140932
SF3B1	https://www.ensembl.org/id/ENSG00000115524	80.1111	88.5857	74.7028	74.1605	53.3382	77.1864	90.0782	91.2702	85.4446	108.31	90.1672	89.8051	0.224848	0.362505	0.18386	0.0471357
CHTOP	https://www.ensembl.org/id/ENSG00000160679	90.5853	90.2439	87.9063	70.3131	68.8273	72.0132	90.3502	87.802	84.1631	86.136	85.8221	88.8373	0.000109658	0.819147	0.363528	0.000240567
TMEM43	https://www.ensembl.org/id/ENSG00000170876	93.5281	94.5473	89.9801	57.1253	58.475	59.8521	108.399	105.246	99.9133	76.4455	79.983	79.1129	0.000152923	0.00353923	0.0229485	0.000188518
SRSF2	https://www.ensembl.org/id/ENSG00000161547	124.258	143.82	89.4063	66.0359	48.9445	63.8954	98.3177	105.793	68.1795	78.1334	61.839	53.4158	0.0525166	0.138196	0.22827	0.622814
HIBADH	https://www.ensembl.org/id/ENSG00000106049	91.8452	89.6939	84.0603	74.5311	77.1449	74.1523	81.0844	80.7453	79.7592	84.4265	92.7498	91.3773	0.0180368	0.0700122	0.0708457	0.0210053
TRIM15	https://www.ensembl.org/id/ENSG00000204610	82.6711	79.5297	78.2616	65.0422	56.3797	59.1434	81.8839	86.7775	83.7604	117.508	104.323	106.048	0.00620358	0.017476	0.109095	0.00130179
RBM42	https://www.ensembl.org/id/ENSG00000126254	85.6743	77.2823	73.5099	92.1009	93.6775	87.7097	83.498	84.1163	82.105	76.0207	84.0386	81.5902	0.0560854	0.375029	0.343658	0.0263436
H2BC12	https://www.ensembl.org/id/ENSG00000197903	97.971	92.4903	89.2689	88.5136	91.1482	89.5705	77.4878	73.226	83.3095	73.9764	74.1311	69.8648	0.300543	0.201288	0.0176762	0.00149133
FAM89B	https://www.ensembl.org/id/ENSG00000176973	81.1829	78.7301	82.1532	94.8214	92.006	83.1887	85.3219	82.6216	89.6631	76.5293	78.8335	75.7735	0.107412	0.0338887	0.110837	0.0577475
FAM114A1	https://www.ensembl.org/id/ENSG00000197712	62.7053	60.2077	79.5628	64.2316	60.9321	70.6453	82.7509	79.318	99.108	112.389	111.645	116.599	0.763561	0.042176	0.0856161	0.000571552
ILRUN	https://www.ensembl.org/id/ENSG00000196821	83.4345	83.622	70.3547	84.6694	82.3256	87.6811	88.4166	87.7492	84.4752	79.0482	83.6736	84.3204	0.320329	0.0985999	0.21458	0.325548
COX7A2L	https://www.ensembl.org/id/ENSG00000115944	78.364	74.2211	86.6807	72.073	80.9431	73.2192	79.9292	78.992	90.3471	93.5639	95.8788	95.4781	0.402244	0.0772256	0.553643	0.0150472
INSIG2	https://www.ensembl.org/id/ENSG00000125629	89.2567	103.197	81.6685	79.8779	71.5955	82.5329	91.3195	98.3724	76.8577	75.8381	75.8752	73.1979	0.156208	0.157321	0.791577	0.457514
ADAM15	https://www.ensembl.org/id/ENSG00000143537	95.0618	93.4689	77.5622	59.9019	53.7687	56.8295	96.5854	102.994	93.2629	89.0078	90.3432	90.6863	0.0213076	0.112631	0.251017	0.00148299
PINK1	https://www.ensembl.org/id/ENSG00000158828	79.388	74.6953	75.4853	109.571	103.961	101.593	73.6806	71.943	77.4892	74.4019	77.5438	79.4293	0.00125321	0.279287	0.381766	0.00131675
DHRS9	https://www.ensembl.org/id/ENSG00000073737	116.37	109.839	103.175	80.8268	74.4666	81.8613	76.2983	75.4031	71.5441	67.0628	73.2184	68.8189	0.00456873	0.11774	0.00567609	0.0363278
PIK3R2	https://www.ensembl.org/id/ENSG00000105647	90.565	90.3599	74.5882	88.977	83.7362	88.7102	84.2756	84.1874	73.1121	76.9238	82.2286	80.9429	0.751725	0.911199	0.516172	0.0384844
SPCS3	https://www.ensembl.org/id/ENSG00000129128	89.671	90.8764	71.2318	101.272	95.7319	108.503	80.3191	79.7071	63.3649	72.421	76.1877	69.0084	0.0871843	0.77017	0.326034	0.00532584
LBR	https://www.ensembl.org/id/ENSG00000143815	89.4768	91.1014	82.6793	52.233	46.2253	55.0835	99.659	103.406	94.5511	92.5398	97.7274	92.2765	0.000570185	0.191395	0.0345984	0.000357831
ATXN10	https://www.ensembl.org/id/ENSG00000130638	92.7386	90.8767	76.9515	88.186	86.3509	90.3603	82.4551	79.7504	74.3062	77.1699	81.4298	75.7864	0.801966	0.822471	0.24642	0.010676
GOLPH3	https://www.ensembl.org/id/ENSG00000113384	81.6308	82.3548	84.598	72.4188	69.4965	77.0392	83.931	83.5568	84.0402	90.6032	95.0836	91.0834	0.0320553	0.0262798	0.386573	0.0032441
NFE2L1	https://www.ensembl.org/id/ENSG00000082641	80.5123	77.5915	64.2359	77.5738	71.34	83.8025	83.774	83.9328	81.7249	94.1193	97.5439	99.5953	0.607743	0.00550965	0.211359	0.0191531
TRAPPC4	https://www.ensembl.org/id/ENSG00000196655	89.4799	93.9723	83.5076	102.63	101.176	97.9748	68.5866	73.5723	68.2733	68.9225	74.2062	73.0289	0.0446076	0.462077	0.0107878	0.000198844
SINHCAF	https://www.ensembl.org/id/ENSG00000139146	92.3845	84.2504	81.2858	84.6936	81.6873	91.8706	82.9556	80.6283	72.6295	78.427	84.5968	78.2581	0.98158	0.679597	0.187939	0.20689
AKIRIN1	https://www.ensembl.org/id/ENSG00000174574	76.2789	79.5112	78.4198	98.3527	86.7522	102.294	77.6369	73.2266	65.7754	84.8222	86.1842	84.2463	0.0575551	0.0616864	0.227993	0.146475
C9orf78	https://www.ensembl.org/id/ENSG00000136819	78.5466	81.8564	75.4546	104.959	101.441	104.496	73.035	73.5396	69.5955	74.8376	80.1804	75.2516	0.000911312	0.0972586	0.0496756	0.000479756
HSPH1	https://www.ensembl.org/id/ENSG00000120694	84.3268	76.0239	61.7111	100.358	93.0156	107.504	76.1313	72.3683	64.0366	84.8451	85.1682	85.3046	0.0365251	0.057238	0.70023	0.0680358
PSMC4	https://www.ensembl.org/id/ENSG00000013275	76.6009	78.0114	62.5947	99.4724	101.589	99.2692	74.7422	72.4826	69.9468	85.2478	87.4273	83.4041	0.027846	0.0022386	0.998344	0.000985087
MID1IP1	https://www.ensembl.org/id/ENSG00000165175	63.3404	63.9542	72.4227	111.528	107.026	108.193	65.4003	64.5909	79.5429	85.9494	80.2759	87.9951	0.00131671	0.0733526	0.601077	0.00213777
MICA	https://www.ensembl.org/id/ENSG00000204520	72.3468	76.3804	76.9685	115.519	107.239	110.291	68.1042	69.5806	80.7184	74.1663	68.6349	69.8758	0.000673606	0.691704	0.613344	0.000334737
VAPA	https://www.ensembl.org/id/ENSG00000101558	80.1605	77.5839	80.1108	75.0117	75.8787	77.7354	83.816	82.8289	84.7341	90.1865	91.2876	89.1683	0.058424	0.00152337	0.0159071	0.000237973
REEP3	https://www.ensembl.org/id/ENSG00000165476	82.9019	81.8387	80.5651	75.3742	70.1673	83.4627	91.0586	87.9705	81.8241	84.9094	87.6403	80.6874	0.293975	0.498119	0.190952	0.160789
METAP2	https://www.ensembl.org/id/ENSG00000111142	89.6787	87.9362	87.8265	62.9525	65.5462	64.8414	93.7508	88.5589	92.6761	80.6867	88.6997	84.2846	2.70653e-05	0.0727062	0.172136	0.00773493
CAMLG	https://www.ensembl.org/id/ENSG00000164615	68.9627	65.5362	72.7204	66.9822	65.6985	66.6669	90.2489	87.7338	98.3126	103.682	99.4143	100.489	0.332707	0.0888044	0.0060725	0.000590628
GNG12	https://www.ensembl.org/id/ENSG00000172380	82.7906	79.2933	65.1067	78.0261	75.6092	88.4337	87.908	88.9969	78.9161	84.6463	85.474	90.7374	0.503102	0.680104	0.21919	0.250697
THOC6	https://www.ensembl.org/id/ENSG00000131652	93.0638	95.9559	103.889	70.2831	64.2013	62.5173	90.5558	86.2184	87.9669	76.8316	78.0459	75.0575	0.00192638	0.00258398	0.0861883	0.0312139
CPNE3	https://www.ensembl.org/id/ENSG00000085719	86.2182	86.9714	69.368	61.6487	61.9373	70.018	96.8162	96.3049	83.299	88.3389	91.0312	92.321	0.0868928	0.759712	0.199141	0.00465994
GTPBP6	https://www.ensembl.org/id/ENSG00000178605	91.441	93.1313	87.3647	63.2236	56.0631	59.3461	86.3501	90.6864	84.0888	97.0538	87.975	85.704	0.000384295	0.476629	0.236564	0.00349458
TMEM125	https://www.ensembl.org/id/ENSG00000179178	71.8163	85.0045	76.9916	103.368	90.3972	96.8631	74.8702	74.6617	67.7421	87.4863	79	73.9946	0.0241933	0.182647	0.300071	0.0371904
MTIF3	https://www.ensembl.org/id/ENSG00000122033	77.7426	80.8463	86.5824	96.4888	86.0842	92.8723	77.1753	74.0007	71.6232	78.9237	80.8972	78.8982	0.066813	0.0647442	0.0832016	0.0511202
EPS8L1	https://www.ensembl.org/id/ENSG00000131037	79.5386	83.8127	74.3989	92.6719	79.3067	89.8199	81.2621	82.1666	75.7272	85.873	76.9196	79.9472	0.186788	0.737698	0.897125	0.270397
ST6GALNAC4	https://www.ensembl.org/id/ENSG00000136840	79.4905	73.0327	72.3184	89.384	94.3968	94.0893	67.0759	67.1227	64.9325	92.1959	92.2306	94.4446	0.00450908	1.38581e-05	0.0531387	0.864384
MMP28	https://www.ensembl.org/id/ENSG00000271447	99.3389	94.7982	92.8894	73.4881	67.1549	70.3453	79.0839	80.476	72.2138	83.3385	82.491	84.588	0.000670276	0.128661	0.00563292	0.012097
BCAS2	https://www.ensembl.org/id/ENSG00000116752	82.7192	74.1867	73.5137	107.326	102.627	99.3723	69.7987	75.0325	69.003	77.784	77.494	70.5905	0.00270962	0.257446	0.203195	0.00107967
GCNT3	https://www.ensembl.org/id/ENSG00000140297	87.0131	84.6442	80.0512	84.1904	83.7424	91.3263	77.7456	77.9238	80.2343	76.3321	80.2547	75.751	0.476343	0.515088	0.109078	0.0464558
ATP8B1	https://www.ensembl.org/id/ENSG00000081923	82.1004	79.4228	68.6591	59.4746	56.6475	66.4959	91.8714	92.755	84.566	96.039	99.6444	101.046	0.039929	0.0504282	0.06633	0.00144462
TMEM11	https://www.ensembl.org/id/ENSG00000178307	84.3183	76.4945	86.9126	76.2796	73.417	74.599	79.327	74.5425	95.5599	85.8648	81.0785	89.8705	0.121957	0.746255	0.94132	0.0400563
VPS25	https://www.ensembl.org/id/ENSG00000131475	88.9934	79.7424	75.5576	112.516	108.454	109.859	71.0094	64.2205	59.5205	70.1282	72.5078	65.7052	0.0127269	0.32159	0.0347655	0.000238819
ST3GAL1	https://www.ensembl.org/id/ENSG00000008513	72.0519	71.2586	58.896	102.706	90.8344	111.837	77.3178	77.321	63.7546	81.8235	81.7117	87.1148	0.0126901	0.127243	0.434227	0.0853156
ABCC3	https://www.ensembl.org/id/ENSG00000108846	83.6839	95.5544	68.1399	72.8442	60.9958	72.3105	88.3581	90.1138	74.9683	93.9016	85.7231	89.9755	0.220555	0.388771	0.840251	0.0148323
OGDH	https://www.ensembl.org/id/ENSG00000105953	81.2071	76.8687	53.1458	98.598	94.96	108.183	79.1736	82.2722	66.3775	76.586	76.3299	82.2422	0.0566064	0.676509	0.616562	0.016126
RHOD	https://www.ensembl.org/id/ENSG00000173156	65.8908	59.4334	58.6992	155.7	165.299	151.317	47.6003	48.3501	49.403	55.4615	59.6217	58.1942	0.000201332	0.00823995	0.025179	0.000798301
GUCD1	https://www.ensembl.org/id/ENSG00000138867	81.7705	76.7364	79.5295	74.4896	71.1326	75.0891	85.1944	81.1214	90.7474	83.5561	87.7146	87.7935	0.0402319	0.844713	0.136824	0.00250906
PIH1D1	https://www.ensembl.org/id/ENSG00000104872	98.821	96.115	78.9872	72.1458	68.9276	71.8091	89.5808	88.7995	75.8282	75.3536	81.0937	77.1527	0.078165	0.2599	0.443074	0.0345056
TRIM8	https://www.ensembl.org/id/ENSG00000171206	76.5137	75.9042	67.6598	107.894	103.672	109.126	74.5453	75.4014	64.2926	70.6827	76.0216	72.2805	0.0015198	0.714699	0.693152	0.000121993
TIMM13	https://www.ensembl.org/id/ENSG00000099800	105.99	101.504	90.8069	86.7972	90.1523	80.0707	74.9509	80.0335	71.6224	64.0651	65.7276	62.1754	0.0727772	0.0280569	0.0174883	0.0112537
PPP3R1	https://www.ensembl.org/id/ENSG00000221823	82.8157	77.9319	79.2411	70.7739	74.6961	73.8301	84.4367	82.5274	83.6718	85.7812	90.0025	88.1142	0.0230747	0.0508565	0.122488	0.000955056
CKAP4	https://www.ensembl.org/id/ENSG00000136026	77.079	74.0057	78.5548	67.9742	66.3967	67.6251	74.2181	72.3348	79.2531	102.148	105.373	108.13	0.0127151	0.000438243	0.63536	0.00109023
TM7SF2	https://www.ensembl.org/id/ENSG00000149809	86.788	89.7459	71.8111	120.385	121.077	114.728	67.2779	66.6917	61.5534	58.2802	55.7984	58.6362	0.0145105	0.0347942	0.0746986	0.000184427
NDUFS2	https://www.ensembl.org/id/ENSG00000158864	83.0988	86.3696	76.2432	81.1612	77.3653	78.4561	86.1585	82.3103	74.6746	86.4562	81.122	78.9388	0.439242	0.79684	0.858655	0.294633
TPM2	https://www.ensembl.org/id/ENSG00000198467	115.197	131.355	116.825	32.3225	27.0566	31.6728	92.2992	86.6529	89.8704	89.4435	81.4111	77.2975	0.0014714	0.183661	0.0180001	0.00123431
POLR2K	https://www.ensembl.org/id/ENSG00000147669	77.1131	77.7251	67.088	115.393	108.561	118.69	67.1421	60.8785	56.2682	77.0849	75.2652	70.1554	0.000998205	0.0348217	0.0553653	0.000698094
FERMT1	https://www.ensembl.org/id/ENSG00000101311	91.5291	92.2406	62.3288	97.9727	85.2336	105.185	76.9708	80.1542	56.1985	74.6821	76.9414	71.6026	0.299905	0.705909	0.430968	0.0568227
ANKRD37	https://www.ensembl.org/id/ENSG00000186352	94.7502	93.3336	107.359	27.0137	29.9229	26.5869	117.065	113.304	113.871	84.6043	84.5369	78.3941	0.00265453	0.000641734	0.0593421	0.000176459
NOA1	https://www.ensembl.org/id/ENSG00000084092	77.1906	75.2199	69.9629	67.7631	67.4527	67.9653	91.0323	89.4346	88.001	90.1747	91.2824	95.0199	0.0966743	0.208503	0.0103889	0.00330829
PDXK	https://www.ensembl.org/id/ENSG00000160209	83.4923	86.7386	77.3595	82.5277	75.532	81.9004	83.0684	84.4101	79.7196	80.3203	78.1599	76.9827	0.514127	0.0909421	0.968865	0.586083
DCTN6	https://www.ensembl.org/id/ENSG00000104671	76.376	74.8206	77.8622	84.0576	84.8406	88.2465	74.4776	73.753	78.0922	85.5955	88.8881	82.8512	0.00568755	0.0108887	0.604551	0.978193
PPP1R14B	https://www.ensembl.org/id/ENSG00000173457	110.997	107.118	93.4006	72.577	67.6054	66.9444	85.8514	80.1599	77.6438	66.4175	73.4576	66.9822	0.015204	0.0210411	0.0349143	0.976646
FKBP9	https://www.ensembl.org/id/ENSG00000122642	88.0193	95.1974	74.9816	83.6905	75.2761	84.7933	80.3415	86.2765	66.4452	80.1489	76.1158	77.7971	0.521303	0.960418	0.371898	0.40036
SRA1	https://www.ensembl.org/id/ENSG00000213523	51.4124	49.0601	53.5129	159.988	168.06	159.952	42.5297	41.2033	46.3577	64.8097	66.3285	65.3777	6.14069e-05	0.00278515	0.0177341	0.000577829
SEC23A	https://www.ensembl.org/id/ENSG00000100934	68.2794	65.9811	76.5147	73.7469	69.0759	80.5641	74.3677	75.6389	80.1424	100.82	99.2318	104.177	0.414488	0.000488588	0.171657	0.0069245
GTF2E2	https://www.ensembl.org/id/ENSG00000197265	83.2616	78.2091	82.2765	74.7388	72.3452	72.0122	81.6275	78.9692	87.2798	85.8485	85.6044	86.2811	0.0171571	0.31168	0.663834	0.00304162
PRMT5	https://www.ensembl.org/id/ENSG00000100462	91.8859	93.2645	70.885	79.1756	72.67	82.5927	86.0928	85.717	72.6503	78.1418	76.1413	78.408	0.432885	0.469317	0.677438	0.862136
STAT3	https://www.ensembl.org/id/ENSG00000168610	63.7345	60.9269	58.5308	96.4154	91.8421	103.144	74.1295	76.6197	74.1886	86.8974	90.3164	90.7519	0.00282845	0.00115701	0.00348071	0.12784
SCNN1A	https://www.ensembl.org/id/ENSG00000111319	72.5824	77.2246	72.7803	63.3234	57.1276	63.846	89.7567	94.2085	94.0446	93.1347	94.0865	95.228	0.0109999	0.425209	0.000931703	0.00250191
DYNC2I2	https://www.ensembl.org/id/ENSG00000119333	116.111	123.143	89.7684	76.0509	76.5353	75.8489	82.8927	86.3579	74.1321	57.0583	53.1417	55.165	0.0807529	0.0128981	0.0934181	0.00222494
TXNDC17	https://www.ensembl.org/id/ENSG00000129235	85.2275	85.9697	75.1716	97.7331	99.7993	92.3384	72.5008	69.672	63.6382	75.7775	77.1118	71.0494	0.0321417	0.139728	0.0398933	0.00183282
PAIP2	https://www.ensembl.org/id/ENSG00000120727	80.3843	80.0801	83.2913	72.4539	72.6377	74.3383	83.6844	83.6996	84.3297	84.9988	83.9923	82.0822	0.00504399	0.82898	0.116666	0.000927012
HES6	https://www.ensembl.org/id/ENSG00000144485	85.5074	105.229	83.2186	119.201	103.614	103.723	67.8266	75.5847	66.4699	53.6064	50.8577	49.6894	0.120005	0.0127756	0.0765764	0.00597278
CCNK	https://www.ensembl.org/id/ENSG00000090061	67.5918	63.5547	67.4723	101.632	100.183	104.901	67.3347	68.2119	79.5995	80.9423	80.155	81.5428	4.88929e-05	0.144763	0.296205	0.00238047
COLGALT1	https://www.ensembl.org/id/ENSG00000130309	89.1229	86.9968	79.1636	60.9962	59.3309	64.4127	87.7048	86.8144	84.7913	88.5322	86.4993	88.6791	0.00662655	0.260442	0.706181	0.000723193
MDM2	https://www.ensembl.org/id/ENSG00000135679	35.5118	35.9412	31.8778	238.046	226.408	268.499	19.7597	19.3392	18.0423	24.4225	22.4999	21.7523	0.00328056	0.0208764	0.00280852	0.00309671
SFPQ	https://www.ensembl.org/id/ENSG00000116560	114.752	118.691	80.5912	68.1589	54.3722	64.4424	98.7842	94.9407	73.9443	67.6422	64.7845	60.948	0.0603048	0.0770784	0.35195	0.672818
CLNS1A	https://www.ensembl.org/id/ENSG00000074201	85.0776	82.1474	83.3737	70.4179	69.8444	68.4609	87.6058	83.901	86.2409	79.9111	82.3318	79.8408	0.000356748	0.0209141	0.162242	0.000650487
TBCB	https://www.ensembl.org/id/ENSG00000105254	90.2046	86.7687	82.7339	79.4331	80.5737	76.8904	77.1645	74.3776	69.5052	78.925	81.7139	80.5159	0.0525386	0.0821124	0.0143691	0.358794
GPR108	https://www.ensembl.org/id/ENSG00000125734	75.0775	76.5666	67.6479	92.5604	79.275	84.8771	83.3679	81.8596	80.8103	81.7373	76.7509	78.1927	0.0641622	0.158076	0.0750355	0.218518
PTP4A1	https://www.ensembl.org/id/ENSG00000112245	76.7625	70.223	73.269	145.488	136.8	129.006	43.8458	44.5133	49.8211	76.4714	55.1867	56.3982	0.00213173	0.129275	0.000513339	0.00150817
MAPK6	https://www.ensembl.org/id/ENSG00000069956	65.4972	66.4261	68.6531	85.7948	74.3614	89.9981	74.8728	70.2435	81.5746	94.5997	92.2187	93.0382	0.066247	0.0283384	0.108651	0.165583
CCNB1IP1	https://www.ensembl.org/id/ENSG00000100814	74.2304	75.1188	85.6659	63.0052	64.4552	66.5205	91.2911	82.6378	99.2196	84.1011	87.2942	83.7235	0.0561737	0.335584	0.107556	0.000193273
KITLG	https://www.ensembl.org/id/ENSG00000049130	80.2269	84.9637	78.3297	122.328	113.65	136.168	64.9855	68.437	61.768	46.089	50.7057	48.5791	0.016138	0.00320616	0.0042831	0.00579189
SNRNP200	https://www.ensembl.org/id/ENSG00000144028	83.496	78.0223	61.6484	65.0189	56.1046	73.1447	97.1048	96.4429	87.4311	86.747	82.4065	88.5106	0.310133	0.11433	0.0808568	0.0374736
SF3A1	https://www.ensembl.org/id/ENSG00000099995	75.3586	70.0487	65.2841	76.3889	79.742	81.6712	87.242	85.4773	87.4785	77.8412	82.2076	86.8902	0.0700029	0.228808	0.0253285	0.384418
FKBP10	https://www.ensembl.org/id/ENSG00000141756	80.0315	82.5235	78.5437	71.6435	68.9602	69.4296	80.5993	82.8494	78.5856	92.5206	84.9837	84.5944	0.00279356	0.105307	0.862812	0.0145091
ABHD10	https://www.ensembl.org/id/ENSG00000144827	95.5748	91.217	82.6275	75.048	75.268	77.4543	77.9824	80.684	74.6554	75.1014	76.3069	72.7828	0.062313	0.223341	0.0690698	0.410816
PJA2	https://www.ensembl.org/id/ENSG00000198961	57.5069	55.8727	61.412	60.1634	55.3127	68.3361	88.1682	82.1598	93.2167	112.126	108.165	112.012	0.525067	0.0101752	0.00380621	0.00283263
SLBP	https://www.ensembl.org/id/ENSG00000163950	108.753	113.443	91.2729	59.4688	56.926	64.5779	86.981	90.7406	74.8451	69.6825	69.8751	66.7044	0.015035	0.0785223	0.0770753	0.0468797
ARL8A	https://www.ensembl.org/id/ENSG00000143862	72.7983	70.808	77.8585	87.7854	91.5894	89.9265	72.1909	73.7405	76.8717	80.7137	79.5838	78.5567	0.00653976	0.0431196	0.86885	0.00333289
TK1	https://www.ensembl.org/id/ENSG00000167900	161.379	153.737	103.901	17.5419	18.4863	17.1086	117.386	119.893	104.24	44.7348	49.4181	43.5348	0.0210986	0.00212702	0.285817	0.00278345
ARPP19	https://www.ensembl.org/id/ENSG00000128989	76.8436	75.6382	70.0991	87.4267	80.8691	96.41	79.0021	75.4689	75.5498	79.7929	78.6257	75.5407	0.0712791	0.488579	0.370944	0.142387
IGSF8	https://www.ensembl.org/id/ENSG00000162729	89.8771	82.1085	92.5649	69.8725	67.9649	66.032	83.8799	83.2941	89.9036	72.0818	75.0088	77.3153	0.0149103	0.0169242	0.550673	0.0253576
MKRN1	https://www.ensembl.org/id/ENSG00000133606	72.8603	74.4061	81.5889	72.0495	73.4471	73.9501	79.9786	76.8747	86.6597	83.5583	87.577	86.9163	0.363739	0.229955	0.283597	0.0033524
ASAP2	https://www.ensembl.org/id/ENSG00000151693	77.6273	76.8399	70.7099	50.0237	40.3959	57.7719	97.3602	95.5045	87.2996	99.1471	96.8501	99.4648	0.0226229	0.236573	0.0108965	0.00890758
TOMM70	https://www.ensembl.org/id/ENSG00000154174	78.9506	75.0008	72.1494	62.5536	60.5328	69.5395	81.6103	80.424	79.049	93.3417	97.0044	98.3248	0.033977	0.00269886	0.113554	0.00170137
ACO2	https://www.ensembl.org/id/ENSG00000100412	71.4434	67.941	56.4122	80.1314	83.1384	86.0084	77.506	81.7455	78.0218	85.2911	89.838	90.6172	0.0455718	0.0124181	0.0828642	0.0818786
HSBP1L1	https://www.ensembl.org/id/ENSG00000226742	92.0646	96.7473	94.5001	68.0077	57.1582	65.3204	83.3393	84.982	80.713	74.5642	77.3467	71.126	0.00486815	0.0208792	0.0034799	0.0591332
C17orf49	https://www.ensembl.org/id/ENSG00000258315	83.2625	76.5743	73.7965	78.1053	80.8156	76.8912	68.5764	65.2234	75.0638	87.5381	92.7958	87.1427	0.828324	0.00763185	0.109843	0.0122337
RNF11	https://www.ensembl.org/id/ENSG00000123091	73.7016	71.4457	72.9397	83.9919	83.974	89.3026	75.7482	72.1859	78.6223	78.6166	83.7228	80.6813	0.0103501	0.085706	0.265338	0.111314
KDM5C	https://www.ensembl.org/id/ENSG00000126012	73.5152	78.2613	69.9698	69.2032	60.6647	72.6034	85.1774	84.2372	88.9454	89.9476	83.4882	87.954	0.217856	0.696007	0.0186328	0.0157002
INF2	https://www.ensembl.org/id/ENSG00000203485	78.8353	81.0545	61.4533	93.3024	79.0486	89.4223	79.2669	78.6076	74.1746	79.6087	71.8894	76.9304	0.156652	0.687978	0.627345	0.102992
HK1	https://www.ensembl.org/id/ENSG00000156515	76.9782	70.8434	59.6429	80.5638	82.3883	85.6952	83.0817	81.8256	74.4983	79.2849	83.5028	85.2877	0.103774	0.426437	0.159522	0.938784
CBX1	https://www.ensembl.org/id/ENSG00000108468	89.8994	91.8403	84.0275	72.5079	68.6321	74.8025	86.2924	83.709	78.7615	70.282	70.2182	71.4701	0.00600352	0.027614	0.153871	0.541611
SURF1	https://www.ensembl.org/id/ENSG00000148290	71.8118	71.9688	65.6372	100.88	102.585	94.9674	67.2559	71.1753	62.9583	77.6975	75.7056	78.975	0.000708394	0.0348849	0.445322	0.00483296
SH3KBP1	https://www.ensembl.org/id/ENSG00000147010	85.2853	83.0203	77.5371	62.4073	59.2662	62.4646	93.2734	90.6173	86.6663	78.541	81.4256	80.4386	0.0049452	0.0210451	0.0532014	0.000209728
IRAK1	https://www.ensembl.org/id/ENSG00000184216	83.1257	81.1771	61.6981	96.4315	85.4468	93.7504	70.723	72.4533	63.6882	75.9981	78.764	76.5205	0.121195	0.0820983	0.45798	0.039453
MRPL24	https://www.ensembl.org/id/ENSG00000143314	93.4381	84.0786	70.928	90.4494	83.2741	79.4168	73.3717	73.3938	62.8822	75.1162	79.2786	73.8399	0.843992	0.212425	0.177333	0.106937
RNH1	https://www.ensembl.org/id/ENSG00000023191	73.3764	72.9538	68.8488	94.6433	92.7347	88.3038	71.0597	74.4233	72.9053	74.9936	77.0265	77.9937	0.00137829	0.0425074	0.57652	0.00625089
PHF5A	https://www.ensembl.org/id/ENSG00000100410	91.4095	89.5472	83.9281	77.7196	78.4791	76.7895	71.3372	72.4413	69.9988	74.4013	78.1706	73.7924	0.0367986	0.0725118	0.0112007	0.243414
NOMO1	https://www.ensembl.org/id/ENSG00000103512	76.2996	67.9794	50.2379	91.4671	93.7499	99.9825	68.7581	70.134	63.187	80.4142	81.9041	93.1719	0.0475064	0.0291398	0.778284	0.118936
GOLPH3L	https://www.ensembl.org/id/ENSG00000143457	69.6122	64.7802	67.4569	72.9665	71.4561	75.8784	78.3183	76.3163	82.0374	91.9783	91.3981	94.8255	0.0323827	0.00405524	0.00656912	0.000402178
ACSL4	https://www.ensembl.org/id/ENSG00000068366	68.293	71.0322	58.739	63.6056	60.3924	68.4229	85.4381	86.5029	77.6855	96.52	98.8508	100.774	0.694718	0.0178626	0.0239496	0.000909852
HILPDA	https://www.ensembl.org/id/ENSG00000135245	97.9337	99.6043	93.2717	41.9562	45.7602	53.893	105.217	110.232	92.4145	69.052	66.6758	59.9883	0.00100111	0.00834343	0.40032	0.0174363
PAPSS1	https://www.ensembl.org/id/ENSG00000138801	80.0071	82.0265	64.8026	81.4776	77.8362	84.1491	78.8229	79.7612	66.2895	78.5332	81.7884	80.2092	0.41943	0.352158	0.929819	0.667233
SUB1	https://www.ensembl.org/id/ENSG00000113387	90.6209	91.4339	83.3456	66.1125	69.7108	68.8095	84.0077	82.3454	79.6713	73.6635	75.2242	69.7387	0.00773919	0.0131337	0.112157	0.0855866
DUSP23	https://www.ensembl.org/id/ENSG00000158716	96.3378	97.7045	95.6555	62.535	68.1348	63.517	85.3358	87.8767	73.4812	66.5781	68.6284	68.8502	0.00117613	0.0815134	0.0813093	0.187843
PLEKHB2	https://www.ensembl.org/id/ENSG00000115762	73.3887	73.7589	62.0655	88.4625	87.4654	92.8599	74.9285	78.8247	68.8045	76.6115	78.0135	79.1067	0.0219948	0.328967	0.411777	0.00991731
RALA	https://www.ensembl.org/id/ENSG00000006451	79.9507	74.4975	70.6397	90.6869	84.4228	93.0593	72.6332	70.9876	70.2272	74.3204	78.6089	73.9939	0.0184206	0.0810966	0.297934	0.0165267
BTG3	https://www.ensembl.org/id/ENSG00000154640	61.8937	57.4564	63.5404	139.674	139.216	141.829	50.7754	55.5073	56.9536	58.8239	52.1605	56.1303	6.85432e-05	0.655715	0.0656972	8.45621e-05
RNF114	https://www.ensembl.org/id/ENSG00000124226	76.3398	83.466	73.3336	89.7701	82.0149	92.7189	75.3096	75.6079	63.3449	79.1452	71.2005	71.0546	0.0758184	0.652659	0.284622	0.027321
IBTK	https://www.ensembl.org/id/ENSG00000005700	71.1268	73.748	69.1021	75.9873	61.2483	83.6073	74.0813	72.9585	66.7939	98.2563	92.001	94.2428	0.762929	0.00152179	0.986596	0.074456
JOSD1	https://www.ensembl.org/id/ENSG00000100221	74.2509	74.9118	65.535	99.0647	85.1217	103.354	69.9263	70.3727	62.4002	76.769	74.6179	76.7507	0.0287497	0.0725925	0.372759	0.0670114
FAM168B	https://www.ensembl.org/id/ENSG00000152102	78.2172	82.3241	76.3777	72.8414	62.2299	76.1436	80.3007	83.3479	80.5034	81.3748	79.0619	79.6843	0.167106	0.332889	0.313788	0.145215
TFDP1	https://www.ensembl.org/id/ENSG00000198176	114.142	121.472	82.0984	60.8987	56.4206	60.3223	93.5335	95.225	68.5748	58.3009	63.1822	57.8975	0.0591588	0.0894068	0.253677	0.806065
TM9SF4	https://www.ensembl.org/id/ENSG00000101337	72.6953	68.0911	66.2982	61.6173	63.9549	70.2342	83.8879	80.4478	82.9732	90.7592	95.0053	95.0682	0.310518	0.00430731	0.00788793	0.00200517
SF3A3	https://www.ensembl.org/id/ENSG00000183431	84.3556	78.9066	66.2812	98.2368	96.2309	102.428	72.499	71.9966	59.0715	66.8158	68.0966	66.09	0.0408504	0.864356	0.28175	0.00151432
BTBD2	https://www.ensembl.org/id/ENSG00000133243	85.3452	79.3825	74.7582	59.2167	58.7271	59.4659	90.6213	93.1466	93.3082	73.3986	80.4896	82.8473	0.020795	0.0327407	0.0460485	0.019505
VNN1	https://www.ensembl.org/id/ENSG00000112299	97.5738	88.9932	90.4	69.2644	64.6402	78.6978	56.6667	57.9189	48.9006	89.1157	95.6633	89.8126	0.0170048	0.0006969	0.000627845	0.0217235
KCTD3	https://www.ensembl.org/id/ENSG00000136636	85.9737	90.155	76.7985	47.9751	41.7317	47.7595	91.6285	92.2662	84.0111	90.5304	89.6957	88.5583	0.00322276	0.923127	0.360533	0.00113978
RNF126	https://www.ensembl.org/id/ENSG00000070423	79.1753	80.148	74.5791	66.8469	70.0716	68.9077	77.9245	73.5568	79.9503	84.5706	83.3728	87.708	0.016111	0.029608	0.763102	0.000761143
NDUFAF8	https://www.ensembl.org/id/ENSG00000224877	83.5457	89.661	57.2965	154.967	143.58	139.466	48.2103	48.9656	41.9759	39.2895	39.7731	39.9258	0.00951128	0.0925034	0.0854161	0.00186631
MICU2	https://www.ensembl.org/id/ENSG00000165487	87.729	95.4235	65.1549	95.3686	85.1782	96.5632	72.0716	71.6923	52.6056	69.7872	69.7202	65.1635	0.407873	0.712307	0.202417	0.0117095
HSF1	https://www.ensembl.org/id/ENSG00000185122	72.0338	70.7389	65.8219	84.3895	78.6652	83.2626	76.166	73.5935	73.8129	81.9804	83.4074	82.4882	0.00829876	0.00326195	0.102657	0.797522
PAF1	https://www.ensembl.org/id/ENSG00000006712	88.4726	85.0521	84.477	78.0437	73.6978	73.893	83.5389	75.2202	77.1044	67.8055	69.0956	69.661	0.0048679	0.0546641	0.080685	0.0330942
NINJ1	https://www.ensembl.org/id/ENSG00000131669	53.9803	51.0765	48.5768	166.346	179.163	162.446	41.5799	43.0787	39.252	42.5804	48.7097	46.9658	0.000804087	0.102802	0.00873394	0.000550426
RER1	https://www.ensembl.org/id/ENSG00000157916	75.1181	74.7613	74.1274	80.8906	74.7412	80.0319	71.1163	74.6414	71.7165	81.6765	83.1879	81.1943	0.178164	0.00404725	0.17704	0.206849
SPRYD3	https://www.ensembl.org/id/ENSG00000167778	71.6076	70.7284	73.3331	86.9244	92.0752	88.5045	63.1465	63.8343	64.5816	77.4704	85.3293	85.4714	0.00220379	0.0170927	0.00241144	0.12084
AMN	https://www.ensembl.org/id/ENSG00000166126	80.3109	84.6163	92.6396	64.6108	53.4887	54.2521	74.5985	74.5181	87.1889	95.6116	77.2863	83.8788	0.00505908	0.376293	0.272013	0.0161609
RAB3B	https://www.ensembl.org/id/ENSG00000169213	65.6913	74.7221	64.2001	58.4839	47.4313	64.999	87.1684	89.3409	81.9516	101.411	91.6852	95.4244	0.15126	0.0524578	0.0143567	0.00603068
TGM2	https://www.ensembl.org/id/ENSG00000198959	38.0109	34.1973	35.8072	157.635	159.582	173.559	36.2765	36.2698	34.0874	67.7555	72.8197	76.3565	0.000989424	0.00256332	0.748009	0.000570635
SMARCD2	https://www.ensembl.org/id/ENSG00000108604	86.2401	88.8001	73.6529	70.8124	66.5998	69.8041	81.0727	80.9932	71.453	76.8558	80.2813	74.3681	0.0891172	0.864651	0.428722	0.0222475
BIN1	https://www.ensembl.org/id/ENSG00000136717	89.6505	90.92	78.5001	82.7507	83.0247	81.3659	69.5028	70.3844	65.8318	71.6028	68.1032	68.8824	0.419907	0.616035	0.0342574	0.0019546
DOK4	https://www.ensembl.org/id/ENSG00000125170	76.6401	77.7914	77.0352	80.2528	71.8073	81.7327	68.8557	69.0356	66.9982	83.6215	84.2325	82.345	0.825892	7.21539e-05	0.0012151	0.216141
ECI2	https://www.ensembl.org/id/ENSG00000198721	92.8066	87.8873	77.3682	61.3653	67.9983	63.6372	85.6667	83.7919	82.9867	70.5855	74.8287	71.4229	0.027163	0.0030479	0.722645	0.0338656
DERL1	https://www.ensembl.org/id/ENSG00000136986	73.481	70.8122	71.6573	71.9187	72.4716	75.0357	72.3224	74.653	77.9444	81.9592	86.2586	91.2488	0.405574	0.029889	0.200942	0.0272154
PPIC	https://www.ensembl.org/id/ENSG00000168938	64.8401	65.7788	61.0427	103.306	99.086	97.4612	61.152	63.8568	54.3933	82.1437	83.7429	82.9049	0.000113444	0.0127192	0.287405	0.00710856
ASNS	https://www.ensembl.org/id/ENSG00000070669	69.3862	66.4539	89.0911	42.9655	37.2775	37.7246	76.3274	77.7737	102.858	109.554	100.519	109.405	0.0309868	0.124958	0.394995	0.000164695
APLP1	https://www.ensembl.org/id/ENSG00000105290	60.4485	58.7406	58.5609	76.1814	80.498	78.6459	76.2851	77.4195	81.1815	88.3925	91.4314	91.4043	0.00101049	0.0038699	0.00226475	0.00205741
PATL1	https://www.ensembl.org/id/ENSG00000166889	85.6787	93.3648	70.7138	57.775	49.3759	59.6417	92.4897	95.2981	75.9603	80.8614	78.8601	78.6926	0.0358253	0.295883	0.631144	0.0137411
SMIM20	https://www.ensembl.org/id/ENSG00000250317	83.3013	74.4056	78.026	77.385	77.2418	80.5158	70.4956	72.2846	71.6453	74.9223	78.1699	80.0101	0.948808	0.0405018	0.105324	0.731005
GOT2	https://www.ensembl.org/id/ENSG00000125166	74.8691	70.8195	53.5845	104.076	106.104	111.379	69.832	65.6288	58.5018	67.0111	67.0992	69.2052	0.0167687	0.446862	0.824575	0.00134642
KCNK1	https://www.ensembl.org/id/ENSG00000135750	72.0373	65.0947	75.0087	71.2811	74.9251	76.8104	71.8791	72.881	77.9378	84.4962	87.7416	87.7863	0.356448	0.00869885	0.378999	0.0050032
HADHB	https://www.ensembl.org/id/ENSG00000138029	78.947	82.6283	68.7044	76.4679	73.9838	79.6592	76.5615	78.8226	66.8132	79.9293	76.5488	78.7211	0.990874	0.360922	0.65376	0.436387
MTSS2	https://www.ensembl.org/id/ENSG00000132613	73.7016	78.1748	69.8899	89.9145	79.6474	89.0594	61.0149	57.4164	61.0123	88.6097	80.397	88.7319	0.0440147	0.00458966	0.0139734	0.948735
TMEM159	https://www.ensembl.org/id/ENSG00000011638	71.859	68.7507	84.6308	58.8971	60.1162	62.534	77.9078	75.6395	92.3315	85.7649	89.0402	89.8914	0.0893099	0.352869	0.389923	8.81433e-05
CRTAP	https://www.ensembl.org/id/ENSG00000170275	68.3486	69.2973	69.7892	82.6529	80.4438	81.4152	77.1798	73.8694	79.1338	77.03	79.5961	78.46	0.000219342	0.411342	0.0312811	0.0337104
MYO18A	https://www.ensembl.org/id/ENSG00000196535	65.4014	70.1023	61.4517	82.8782	71.7231	87.7623	70.098	67.4315	65.5295	94.6204	86.6492	92.8945	0.0658847	0.00292771	0.523438	0.141548
NCOR2	https://www.ensembl.org/id/ENSG00000196498	63.8271	59.3323	54.0985	82.3609	72.7964	92.1072	82.2456	81.9811	80.1806	82.8492	77.8716	86.8784	0.0342635	0.726354	0.0120648	0.986733
MRPL54	https://www.ensembl.org/id/ENSG00000183617	84.0273	79.3376	82.8266	72.9178	79.528	71.1046	75.4524	73.0485	82.5047	67.4151	79.3634	68.5301	0.0786596	0.337254	0.210505	0.586072
ECM1	https://www.ensembl.org/id/ENSG00000143369	96.3973	84.9563	92.4492	103.886	111.043	117.961	63.986	64.6483	66.6361	37.1808	38.3322	38.5129	0.0214687	7.62274e-05	0.0124394	0.00284037
SCAMP3	https://www.ensembl.org/id/ENSG00000116521	72.2869	69.57	70.4065	88.0742	90.5144	84.8266	65.0783	67.1642	68.6661	73.4847	84.6965	81.0405	0.00301136	0.0500432	0.0484851	0.118597
TMUB1	https://www.ensembl.org/id/ENSG00000164897	76.3297	75.5644	87.3554	73.138	73.8857	70.0566	72.9591	67.3836	85.8484	75.1577	76.8097	80.9371	0.18444	0.728317	0.553277	0.0725077
ACTR1A	https://www.ensembl.org/id/ENSG00000138107	77.9504	74.4013	63.9098	102.155	98.209	99.3564	60.8241	65.3756	55.8698	69.8887	74.8281	72.51	0.0165353	0.032128	0.0970389	0.000150363
ERBB3	https://www.ensembl.org/id/ENSG00000065361	75.4358	73.0407	65.2742	47.8677	40.5917	50.456	91.6387	90.4235	78.9636	101.115	99.1041	101.281	0.0042538	0.0750332	0.0394889	0.00190732
KLK1	https://www.ensembl.org/id/ENSG00000167748	84.3041	101.093	102.638	40.6796	38.8009	39.3151	91.6875	92.644	100.408	75.4875	71.0446	77.0273	0.0101372	0.00564436	0.876886	0.00122302
WASH6P	https://www.ensembl.org/id/ENSG00000182484	73.2913	95.2719	74.1231	80.7442	63.2631	81.1098	80.2426	79.3112	65.6843	82.264	70.6953	68.8756	0.564131	0.866008	0.541252	0.887769
MCFD2	https://www.ensembl.org/id/ENSG00000180398	69.0685	65.0069	62.9981	73.6873	67.8443	79.3941	79.8625	80.4328	80.8295	83.1794	84.9076	86.7247	0.12453	0.038871	0.0128373	0.0663896
SNX17	https://www.ensembl.org/id/ENSG00000115234	84.3051	78.1046	67.2753	84.4088	87.1663	81.9721	70.8332	70.9605	66.4545	72.0144	76.0595	74.3232	0.246798	0.0702674	0.285121	0.00646501
TMEM63B	https://www.ensembl.org/id/ENSG00000137216	60.0016	58.7352	61.2467	115.78	102.667	120.94	57.3697	56.3572	59.448	74.6417	70.2918	74.0306	0.00935282	0.00137004	0.12635	0.013679
MICOS10	https://www.ensembl.org/id/ENSG00000173436	82.5554	86.2122	75.5685	79.2229	80.2694	77.5467	77.6389	74.4173	66.8035	68.4548	71.4805	71.2586	0.521103	0.515161	0.13095	0.00273395
SEC31A	https://www.ensembl.org/id/ENSG00000138674	57.6242	55.0539	55.4393	98.065	85.3002	105.207	70.4868	68.7685	68.2702	83.1763	79.5091	84.1304	0.0188331	0.00421353	0.000273789	0.132511
TGFB1	https://www.ensembl.org/id/ENSG00000105329	76.2714	71.2564	81.5221	56.1973	57.4873	53.2954	87.8065	92.9644	98.5428	76.2835	76.8671	81.7842	0.0106118	0.0229636	0.0175122	0.00075966
TPX2	https://www.ensembl.org/id/ENSG00000088325	107.803	102.478	86.5115	15.6696	14.8097	15.3215	109.716	110.451	124.908	72.7964	74.995	74.7378	0.00573649	0.0130361	0.121864	2.438e-05
ZFAND6	https://www.ensembl.org/id/ENSG00000086666	74.389	78.4148	68.1412	88.1174	77.499	84.4853	72.2523	74.1274	67.2948	77.6957	75.4098	72.2049	0.0876608	0.212157	0.544166	0.0998941
ABHD11	https://www.ensembl.org/id/ENSG00000106077	69.4248	74.5133	58.6579	85.4245	82.9993	85.817	79.5635	82.3435	68.1995	75.6061	76.2977	70.9637	0.0618457	0.64416	0.223737	0.0113844
ELMO3	https://www.ensembl.org/id/ENSG00000102890	76.1058	86.2357	75.4997	84.1039	68.2066	78.942	73.8592	75.8448	67.3469	79.6565	73.0266	70.9447	0.727236	0.582689	0.190563	0.666849
MAPKAPK2	https://www.ensembl.org/id/ENSG00000162889	76.1799	72.9316	72.3076	76.4282	78.5646	78.0687	74.468	73.2167	81.5166	71.5487	76.9202	77.335	0.0635632	0.741859	0.433399	0.323838
DIAPH1	https://www.ensembl.org/id/ENSG00000131504	77.8937	73.9855	58.9318	64.0315	60.187	71.9514	92.9652	90.733	77.6147	78.5446	81.6865	79.4842	0.517265	0.269598	0.0906823	0.0444755
TMEM167B	https://www.ensembl.org/id/ENSG00000215717	61.826	59.1096	79.5109	63.8635	59.9937	65.2169	71.5998	69.1381	89.1401	95.4041	96.4659	96.7132	0.617446	0.0892322	0.335817	0.00128284
NPNT	https://www.ensembl.org/id/ENSG00000168743	50.5423	55.5964	54.5188	69.6508	60.9916	74.6098	77.381	78.5573	71.6233	103.738	105.628	105.071	0.0502715	0.00346651	0.00162828	0.0105809
AJUBA	https://www.ensembl.org/id/ENSG00000129474	82.3826	82.769	68.8121	77.9273	74.5014	77.4257	78.9906	80.086	69.3555	69.6604	71.8184	73.3869	0.796262	0.314993	0.764478	0.0302561
PSMC6	https://www.ensembl.org/id/ENSG00000100519	77.0963	79.4772	69.9597	73.5638	66.6773	74.7762	76.3434	76.0596	72.5277	84.8979	81.1741	74.5253	0.371823	0.221014	0.875693	0.0990297
NELFE	https://www.ensembl.org/id/ENSG00000204356	80.4017	76.0189	71.7734	77.2733	77.0408	75.3338	67.9629	69.4067	69.4888	81.6436	81.4081	79.034	0.865894	0.000807868	0.098654	0.0189319
MRPL9	https://www.ensembl.org/id/ENSG00000143436	85.0232	77.7212	70.0383	63.2163	65.5189	69.263	80.1035	74.007	74.9458	81.9728	83.4326	81.5022	0.100438	0.0773547	0.811074	0.00672691
TIMP2	https://www.ensembl.org/id/ENSG00000035862	77.5875	75.9491	81.3957	93.4626	94.1104	92.5444	65.431	67.5327	64.6745	61.7446	64.6738	67.3019	0.00754023	0.523763	0.00620326	0.00168198
ACIN1	https://www.ensembl.org/id/ENSG00000100813	77.3394	84.158	69.2257	68.192	48.5408	69.1411	84.3527	85.6239	77.5818	87.8479	76.4114	77.9011	0.14658	0.704189	0.337555	0.0889344
PNRC1	https://www.ensembl.org/id/ENSG00000146278	68.3562	62.907	71.1197	67.1784	70.1845	65.8802	86.193	91.3718	83.6468	79.9509	78.2626	81.2482	0.922878	0.0711451	0.00413398	0.00238972
ACTN1	https://www.ensembl.org/id/ENSG00000072110	72.184	70.2401	51.5041	88.7773	86.7033	97.1789	77.3475	77.6268	67.2021	68.7447	71.4631	76.8432	0.0395054	0.705698	0.294353	0.0117159
CAVIN1	https://www.ensembl.org/id/ENSG00000177469	124.24	113.106	90.5156	32.0629	31.7932	31.9958	99.9805	99.6628	88.9384	60.0196	66.7914	66.4319	0.0160556	0.00354263	0.317899	0.00451596
PRAG1	https://www.ensembl.org/id/ENSG00000275342	75.1011	74.2415	65.2773	75.9466	72.3199	78.7621	85.5038	87.3004	78.6378	68.1311	71.8181	71.6925	0.333985	0.0227366	0.0418021	0.0932042
HEXIM1	https://www.ensembl.org/id/ENSG00000186834	100.641	113.708	84.8879	81.4125	74.623	79.6466	78.2473	75.2671	60.5667	55.3575	51.1651	49.038	0.118884	0.0579363	0.0552352	0.000658597
MLX	https://www.ensembl.org/id/ENSG00000108788	74.1291	68.1364	66.6194	74.3973	70.1526	73.3464	72.805	70.1526	70.6379	87.27	88.3137	88.4086	0.332207	0.000527028	0.573025	0.00417036
KCNK5	https://www.ensembl.org/id/ENSG00000164626	80.0333	83.4293	75.7662	48.5198	41.6631	49.3638	73.7356	79.5599	75.3954	98.1823	95.9237	102.318	0.000569549	0.000924501	0.283607	0.000109357
SSR1	https://www.ensembl.org/id/ENSG00000124783	76.7434	73.6846	70.9191	74.4584	75.0433	81.284	73.0469	70.1822	68.164	77.4905	83.7697	78.9938	0.321286	0.0177592	0.207857	0.33737
CHTF8	https://www.ensembl.org/id/ENSG00000168802	87.4525	82.8579	75.2753	77.9158	74.9546	85.9693	74.2022	73.85	72.3024	62.6891	66.979	69.1621	0.666575	0.0531635	0.137929	0.0353894
NCAPD2	https://www.ensembl.org/id/ENSG00000010292	95.7331	88.1235	69.4479	33.1385	30.0552	32.0264	105.965	102.368	105.227	79.3879	79.3936	82.6226	0.0201201	9.76796e-05	0.121036	5.55286e-06
ESD	https://www.ensembl.org/id/ENSG00000139684	92.7241	83.3449	75.0739	52.5673	55.3722	54.1649	88.142	89.4358	80.7796	73.7083	79.9635	76.997	0.0258204	0.054673	0.704417	0.00198727
FKBP3	https://www.ensembl.org/id/ENSG00000100442	91.8202	98.9671	76.9352	66.8641	68.5838	64.0969	82.2213	82.6108	70.2983	64.0919	70.123	65.6446	0.0674782	0.0833616	0.241355	0.964961
GALNT12	https://www.ensembl.org/id/ENSG00000119514	88.3672	95.3026	78.6053	58.5382	44.0323	56.5514	86.2634	91.9605	75.9114	77.3537	77.2281	72.114	0.00668395	0.18187	0.708161	0.0264313
ABCA2	https://www.ensembl.org/id/ENSG00000107331	65.9408	80.2384	58.7704	62.7297	45.7223	63.528	92.7675	99.1757	84.8968	89.9432	76.5222	81.6323	0.269678	0.16756	0.0413763	0.0278878
PAICS	https://www.ensembl.org/id/ENSG00000128050	113.397	116.458	86.5364	44.8525	40.7787	47.8347	92.1141	91.6359	76.0021	63.5755	67.4452	61.0828	0.0196377	0.0390456	0.177213	0.0021725
SLK	https://www.ensembl.org/id/ENSG00000065613	72.1154	74.5081	61.7075	72.7028	56.9148	77.2982	86.3657	88.5226	72.9136	80.1526	79.0008	78.8893	0.95221	0.574249	0.106932	0.234434
UBE2J1	https://www.ensembl.org/id/ENSG00000198833	68.8695	66.5004	70.7719	78.3712	75.7989	81.3202	68.406	67.4299	66.0863	85.0248	87.2154	85.2071	0.00971472	4.54212e-05	0.389098	0.0292576
MPRIP	https://www.ensembl.org/id/ENSG00000133030	56.1901	62.2095	55.0246	124.856	89.9615	134.943	64.5012	62.9833	57.6312	69.9095	60.9831	61.2367	0.0465092	0.554938	0.270634	0.0554269
[truncated: 19,452 more rows]

## Sheet: Most Responsive Genes
Gene Name-	Gene Category-	TP53-KO-DMSO	TP53-KO-DMSO	TP53-KO-DMSO	TP53-KO-Nutlin	TP53-KO-Nutlin	TP53-KO-Nutlin	TP53-WT-DMSO	TP53-WT-DMSO	TP53-WT-DMSO	TP53-WT-Nutlin	TP53-WT-Nutlin	TP53-WT-Nutlin
ABCA12	Nutlin-Activated	-0.57392	-0.548761	-0.546579	-0.563835	-0.560001	-0.558746	-0.564044	-0.506423	-0.515267	1.42175	1.55172	1.96411
ABCC2	Nutlin-Activated	-0.646819	-0.600501	-0.538878	-0.440083	-0.390225	-0.364705	-0.695267	-0.591655	-0.614066	1.18999	1.77947	1.91273
ACER2	Nutlin-Activated	-0.570982	-0.543215	-0.623522	-0.649291	-0.694	-0.649859	-0.492064	-0.369381	-0.291706	1.26592	1.64619	1.97191
ACHE	Nutlin-Activated	-0.481735	-0.59644	-0.523511	-0.421673	-0.483494	-0.575593	-0.596049	-0.669724	-0.571625	1.46649	2.00169	1.45167
ADAMTS7	Nutlin-Activated	-0.525782	-0.568775	-0.595239	-0.560609	-0.575152	-0.528358	-0.522891	-0.531182	-0.460786	1.11594	2.05863	1.6942
ADRB2	Nutlin-Activated	-0.622535	-0.629884	-0.532171	-0.634844	-0.539713	-0.572131	-0.576176	-0.312597	-0.485566	1.25605	1.88819	1.76137
ALDH1A3	Nutlin-Activated	-0.753574	-0.688627	-0.674466	-0.607133	-0.573583	-0.616496	-0.395523	-0.312711	-0.291348	1.49954	1.63562	1.7783
ALDH4A1	Nutlin-Activated	-0.655856	-0.614115	-0.567426	-0.612423	-0.613423	-0.630804	-0.552699	-0.311169	-0.387638	1.62711	1.57148	1.74696
ALDH7A1	Nutlin-Activated	-0.623069	-0.549293	-0.558176	-0.603156	-0.554516	-0.594895	-0.560923	-0.461523	-0.462731	1.61684	1.65014	1.7013
ALOX5	Nutlin-Activated	-0.661976	-0.508353	-0.228629	-0.607928	-0.523731	-0.525554	-0.705718	-0.540829	-0.388288	0.842397	1.55404	2.29457
AMOTL1	Nutlin-Activated	-0.57762	-0.565029	-0.516304	-0.572504	-0.56139	-0.5501	-0.560649	-0.548122	-0.512394	1.48448	1.73341	1.74622
ANKK1	Nutlin-Activated	-0.805606	-0.0226431	-0.343538	-0.372237	-0.504535	-0.547867	-0.705591	-0.863909	-0.358093	0.728346	1.4327	2.36298
ANXA6	Nutlin-Activated	-0.640356	-0.630094	-0.608946	-0.501823	-0.49512	-0.525461	-0.580219	-0.475136	-0.509898	1.62991	1.63893	1.69821
APOBEC3C	Nutlin-Activated	-0.623052	-0.596077	-0.601967	-0.712532	-0.701003	-0.717299	-0.347576	-0.296067	-0.321006	1.70444	1.55622	1.65591
ARHGAP30	Nutlin-Activated	-0.689681	-0.517845	-0.552795	-0.568414	-0.425058	-0.442316	-0.480399	-0.477896	-0.443914	0.629067	2.38572	1.58353
ARHGEF40	Nutlin-Activated	-0.649607	-0.509279	-0.635019	-0.50532	-0.48418	-0.423568	-0.651962	-0.509605	-0.534007	1.21448	1.82984	1.85823
ASPA	Nutlin-Activated	-0.435687	-0.595873	-0.595873	-0.595873	-0.595873	-0.420134	-0.384188	-0.595873	-0.595873	1.71984	2.09864	0.996769
ASTN2	Nutlin-Activated	-0.610849	-0.566148	-0.542694	-0.647513	-0.676785	-0.653492	-0.520569	-0.364684	-0.364517	1.67496	1.56142	1.71087
BTBD19	Nutlin-Activated	-0.615747	-0.550982	-0.570445	-0.699417	-0.627119	-0.610716	-0.35642	-0.34024	-0.189271	0.517651	2.11652	1.92618
BTNL3	Nutlin-Activated	-0.68728	-0.21256	-0.492645	-0.767452	-0.459738	-0.0691566	-0.385332	-0.761545	-0.922494	1.4135	1.30923	2.03547
C22orf23	Nutlin-Activated	-0.667843	-0.533738	-0.719927	-0.524485	-0.524213	-0.619192	-0.457649	-0.432132	-0.468197	1.48031	1.7169	1.75017
C3	Nutlin-Activated	-0.684168	-0.565488	-0.574074	-0.484719	-0.573723	-0.493049	-0.600539	-0.484211	-0.480314	1.45415	1.57213	1.91401
CABYR	Nutlin-Activated	-0.54342	-0.50569	-0.64491	-0.749104	-0.661997	-0.59423	-0.471856	-0.319559	-0.441515	1.77643	1.69074	1.46511
CAVIN2	Nutlin-Activated	-0.726507	-0.534258	-0.424233	-0.761701	-0.686099	-0.771448	-0.576733	-0.268313	-0.10877	1.39802	1.68594	1.7741
CDKN1A	Nutlin-Activated	-0.578133	-0.583234	-0.584675	-0.576516	-0.577876	-0.577702	-0.500143	-0.491471	-0.501158	1.60758	1.66503	1.6983
CEL	Nutlin-Activated	-0.472684	-0.471782	-0.56136	-0.584063	-0.625113	-0.71158	-0.512715	-0.675018	-0.309089	1.81959	1.38041	1.72341
CELA3B	Nutlin-Activated	0.110367	0.216909	-0.965843	-0.965843	-0.754069	-0.965843	-0.728809	-0.0913287	-0.309757	1.82663	1.58715	1.04043
CFAP74	Nutlin-Activated	-0.757308	-0.669419	-0.416345	-0.703129	-0.219255	-0.579312	-0.304354	-0.864981	-0.0245917	0.653158	2.17751	1.70802
CHST6	Nutlin-Activated	-0.593253	-0.600328	-0.594926	-0.487938	-0.499813	-0.492025	-0.560137	-0.552886	-0.554415	1.3409	1.70376	1.89106
CST4	Nutlin-Activated	-0.574895	-0.593862	-0.551636	-0.524382	-0.551092	-0.54196	-0.536915	-0.5278	-0.564512	1.53676	1.78409	1.64621
CST5	Nutlin-Activated	-0.508906	-0.544682	-0.572747	-0.572747	-0.560184	-0.561073	-0.530564	-0.507902	-0.546801	1.99481	1.68514	1.22566
CYGB	Nutlin-Activated	-0.566916	-0.572528	-0.572528	-0.565813	-0.572528	-0.572528	-0.528033	-0.510969	-0.51095	1.65525	1.70019	1.61736
CYP3A4	Nutlin-Activated	-0.529583	-0.640514	-0.902555	-0.933876	-0.0570654	-0.244748	-0.358717	-0.0245684	-0.931459	1.77582	1.00203	1.84524
CYP3A7	Nutlin-Activated	-0.912065	-0.912065	-0.292733	-0.912065	0.191261	-0.342494	-0.774851	-0.0261464	-0.405671	1.05084	2.3124	1.02359
CYP4F2	Nutlin-Activated	-0.628234	-0.588451	-0.600506	-0.585774	-0.612789	-0.579215	-0.460399	-0.457251	-0.451553	1.59849	1.67093	1.69475
CYRIA	Nutlin-Activated	-0.298774	-0.774336	-0.33779	-0.45926	-0.577972	-0.567618	-0.646544	-0.541133	-0.688358	1.93456	1.60125	1.35597
DAO	Nutlin-Activated	-0.614825	-0.614825	-0.614825	-0.614825	-0.482509	-0.614825	-0.614825	-0.341627	-0.341543	1.37916	2.14037	1.3351
DNAI3	Nutlin-Activated	-0.558374	-0.564065	-0.556396	-0.575082	-0.575082	-0.565917	-0.541962	-0.524168	-0.503781	1.49197	1.72741	1.74545
DQX1	Nutlin-Activated	-0.629193	-0.525437	-0.4069	-0.527308	-0.670205	-0.387402	-0.581403	-0.547893	-0.586956	1.09426	1.83699	1.93144
DRAM1	Nutlin-Activated	-0.704805	-0.623671	-0.620244	-0.613898	-0.590257	-0.597795	-0.487153	-0.395057	-0.294094	1.43897	1.66232	1.82569
DRAXIN	Nutlin-Activated	-0.572505	-0.49927	-0.512093	-0.462965	-0.585519	-0.633637	-0.552852	-0.534287	-0.559102	1.92694	1.2384	1.7469
E2F7	Nutlin-Activated	-0.561651	-0.511097	-0.493874	-0.730074	-0.714142	-0.692076	-0.522603	-0.303014	-0.338864	1.20087	1.74993	1.9166
ELAPOR1	Nutlin-Activated	-0.509436	-0.566028	-0.577218	-0.579884	-0.606008	-0.557245	-0.538494	-0.564793	-0.46426	1.71323	1.75061	1.49952
EPHA8	Nutlin-Activated	0.204686	-0.849504	-0.849504	-0.218824	-0.227181	-0.849504	-0.152952	-0.849504	-0.206841	0.322783	2.56062	1.11572
F8	Nutlin-Activated	-0.623968	-0.56402	-0.568868	-0.641194	-0.596249	-0.613736	-0.526802	-0.416172	-0.409894	1.69104	1.60977	1.6601
FAM13C	Nutlin-Activated	-0.486596	-0.577927	-0.441736	-0.577927	-0.470095	-0.477728	-0.577927	-0.466605	-0.577927	1.14864	2.49466	1.01117
FAM25G	Nutlin-Activated	-0.70185	-0.58911	-0.791822	-0.702876	-0.290013	-0.279533	-0.432377	-0.337078	-0.76804	1.69734	1.61379	1.58157
FAS	Nutlin-Activated	-0.65536	-0.656274	-0.644558	-0.671677	-0.636691	-0.657483	-0.377876	-0.297875	-0.306296	1.4157	1.64035	1.84804
FAXDC2	Nutlin-Activated	-0.619829	-0.630773	-0.636988	-0.372504	-0.385788	-0.353222	-0.638855	-0.625513	-0.649122	1.33916	1.8091	1.76434
FDXR	Nutlin-Activated	-0.591902	-0.599795	-0.596281	-0.629111	-0.609755	-0.617707	-0.45332	-0.424614	-0.434519	1.76752	1.60055	1.58893
FETUB	Nutlin-Activated	-0.665471	-0.726347	-0.454019	-0.726347	-0.654473	-0.726347	-0.565454	-0.132748	-0.206789	1.3722	1.71548	1.77031
FGF1	Nutlin-Activated	-0.161705	-0.506705	-0.777336	-0.777336	-0.777336	-0.552201	-0.234968	-0.0269557	-0.777336	1.96105	1.87795	0.75288
FOXJ1	Nutlin-Activated	-0.524573	-0.500065	-0.477287	-0.600548	-0.580724	-0.626009	-0.639408	-0.534744	-0.470256	1.69637	1.45724	1.8
GABBR2	Nutlin-Activated	-0.353349	-0.675856	-0.660754	-0.581742	-0.584521	-0.599164	-0.328295	-0.577824	-0.577759	1.74162	1.70253	1.49511
GADD45A	Nutlin-Activated	-0.630303	-0.626589	-0.635667	-0.573161	-0.541342	-0.535233	-0.484797	-0.442658	-0.494286	1.60111	1.72893	1.634
GDF15	Nutlin-Activated	-0.621311	-0.63473	-0.632461	-0.551886	-0.565013	-0.554657	-0.452769	-0.451517	-0.500029	1.67489	1.69533	1.59416
GDF5	Nutlin-Activated	-0.572809	-0.572809	-0.572809	-0.335958	-0.572809	-0.355639	-0.31122	-0.572809	-0.572809	0.307692	2.24466	1.88732
gene:ENSG00000281883	Nutlin-Activated	-0.616037	0.474115	0.231929	-1.11954	-0.76286	-0.567149	-0.720315	-0.383085	-0.873983	1.23209	1.09557	2.00926
gene:ENSG00000285901	Nutlin-Activated	-0.662705	-0.579768	-0.663895	-0.653548	-0.650858	-0.643052	-0.388564	-0.408553	-0.258071	1.79709	1.37763	1.73429
gene:ENSG00000286190	Nutlin-Activated	-0.688365	-0.642972	-0.660893	-0.762606	-0.629018	-0.549569	-0.19099	-0.448933	-0.171043	1.25934	2.22766	1.25739
GLP2R	Nutlin-Activated	-0.798701	0.106239	-0.798701	-0.525022	-0.528649	-0.798701	-0.798701	0.0376775	-0.240945	0.981764	2.45685	0.906888
GPC1	Nutlin-Activated	-0.577362	-0.58885	-0.562827	-0.593218	-0.592757	-0.616716	-0.52549	-0.414249	-0.496077	1.65047	1.66707	1.65
GPR87	Nutlin-Activated	-0.564732	-0.571749	-0.567641	-0.579432	-0.579462	-0.571353	-0.514471	-0.503617	-0.50589	1.7101	1.45123	1.79701
GPX1	Nutlin-Activated	-0.595174	-0.603205	-0.598709	-0.571123	-0.550294	-0.577954	-0.494077	-0.476266	-0.495583	1.79884	1.62675	1.5368
GREB1	Nutlin-Activated	-0.604708	-0.573405	-0.537801	-0.554585	-0.531174	-0.541616	-0.545824	-0.530866	-0.549826	1.74915	1.55855	1.66211
GRIN2C	Nutlin-Activated	-0.543772	-0.597285	-0.593056	-0.512219	-0.542741	-0.56235	-0.483744	-0.390409	-0.465118	0.816324	2.35441	1.51996
HES2	Nutlin-Activated	-0.602755	-0.627435	-0.602584	-0.624268	-0.619085	-0.630371	-0.443429	-0.4167	-0.382919	1.52216	1.68049	1.7469
HHAT	Nutlin-Activated	-0.490127	-0.503489	-0.501598	-0.577223	-0.562387	-0.615156	-0.643259	-0.515095	-0.548465	1.46852	1.68813	1.80015
HMCN2	Nutlin-Activated	-0.570366	-0.63477	-0.423811	-0.473133	-0.564066	-0.488313	-0.602322	-0.593521	-0.504946	1.10413	2.08423	1.66688
HPX	Nutlin-Activated	0.37004	0.0350264	-0.699951	-0.989585	-0.989585	0.0758692	-0.989585	-0.752839	-0.0423117	0.522354	2.27762	1.18295
HRNR	Nutlin-Activated	-0.607764	-0.486208	-0.40788	-0.710987	-0.74658	-0.707499	-0.493162	-0.208634	-0.264833	0.849764	1.42986	2.35392
HS3ST6	Nutlin-Activated	-0.546074	-0.505429	-0.67357	-0.368467	-0.37251	-0.67357	-0.67357	-0.362765	-0.51812	0.885997	1.47105	2.33703
ICAM4	Nutlin-Activated	-0.503063	-0.578976	-0.559767	-0.725943	-0.59437	-0.481423	-0.284142	-0.454279	-0.59007	1.25684	2.30217	1.21303
IGDCC4	Nutlin-Activated	-0.55657	-0.453667	-0.49575	-0.631849	-0.682733	-0.536371	-0.526343	-0.46032	-0.392587	0.777675	2.01698	1.94154
IGFL2	Nutlin-Activated	-0.649502	-0.632037	-0.667686	-0.741809	-0.732487	-0.744424	-0.227839	-0.249657	-0.22876	1.68673	1.60552	1.58195
KANK3	Nutlin-Activated	-0.605348	-0.385721	-0.566974	-0.62716	-0.702892	-0.633295	-0.431658	-0.58041	-0.407545	1.48692	1.79518	1.6589
KCNN3	Nutlin-Activated	-0.570766	-0.591315	-0.740872	-0.605181	-0.60698	-0.181004	-0.665939	-0.533533	-0.3952	1.7813	1.31345	1.79604
KIAA1755	Nutlin-Activated	-0.556513	-0.0222945	0.0901738	-0.882741	-0.49758	-0.882741	-0.882741	-0.0874848	-0.484991	0.568338	2.49415	1.14442
KLHL30	Nutlin-Activated	-0.704743	-0.660507	-0.708904	-0.409402	-0.472131	-0.367758	-0.567081	-0.551023	-0.477969	1.38425	1.86737	1.66789
KLRC2	Nutlin-Activated	-0.302395	0.164982	-0.147601	-1.10468	-0.536342	-0.576571	-0.468551	-0.322368	-0.909042	0.322779	1.59439	2.2854
KLRC3	Nutlin-Activated	-0.848213	-0.0820541	0.0180899	-0.384798	-0.848213	0.00159956	-0.336396	-0.848213	-0.848213	0.228512	1.90807	2.03983
KPRP	Nutlin-Activated	-0.6155	-0.390221	-0.561248	-0.642868	-0.642868	-0.612843	-0.42587	-0.476078	-0.476027	1.12228	2.11927	1.60197
KRT6B	Nutlin-Activated	-0.60636	-0.575358	-0.555883	-0.576583	-0.592521	-0.558312	-0.580376	-0.447219	-0.469921	1.72338	1.51169	1.72747
LAMC3	Nutlin-Activated	-0.549177	-0.525563	-0.291912	-0.446	-0.535791	-0.623238	-0.427488	-0.623238	-0.532936	0.529814	2.3476	1.67793
LCE1B	Nutlin-Activated	-0.558846	-0.558846	-0.558846	-0.554583	-0.558846	-0.558846	-0.530595	-0.537131	-0.541469	1.87399	1.55273	1.53129
LCE1C	Nutlin-Activated	-0.553312	-0.553312	-0.553312	-0.553312	-0.508842	-0.553312	-0.553312	-0.553312	-0.507389	2.12733	1.39615	1.36593
LCE1E	Nutlin-Activated	-0.576142	-0.567363	-0.57532	-0.584448	-0.573862	-0.582829	-0.54111	-0.476682	-0.492036	1.59067	1.6509	1.72822
LCE3D	Nutlin-Activated	-0.733904	-0.578956	-0.183691	-0.60801	-0.705287	-0.370961	-0.892306	-0.120014	-0.602608	1.57375	1.25979	1.9622
LCE3E	Nutlin-Activated	-0.466175	-0.675972	-0.545803	-0.779165	-0.502012	-0.52163	-0.468954	-0.397667	-0.588358	1.74422	1.54952	1.65199
LCN15	Nutlin-Activated	-0.55723	-0.591175	-0.540556	-0.550559	-0.591175	-0.591175	-0.546316	-0.384298	-0.591175	1.78696	1.38537	1.77133
LGALS9B	Nutlin-Activated	-0.796913	-0.527925	-0.703726	-0.494787	-0.389306	-0.535658	-0.652346	-0.292888	-0.523996	1.43959	1.71373	1.76422
LGALS9C	Nutlin-Activated	-0.870894	-0.953099	-0.278902	-0.067865	-0.613403	-0.457076	-0.464252	-0.702605	-0.301616	1.42365	1.17424	2.11182
LGI3	Nutlin-Activated	-0.643099	-0.645662	-0.702902	-0.737534	-0.670014	-0.42686	-0.179233	-0.520019	-0.376608	1.73581	1.70717	1.45895
LRATD1	Nutlin-Activated	-0.602833	-0.532997	-0.553487	-0.644249	-0.628329	-0.637547	-0.535488	-0.408932	-0.410443	1.57749	1.5949	1.78192
LY6D	Nutlin-Activated	-0.67762	-0.638129	-0.638412	-0.626562	-0.624433	-0.623632	-0.379682	-0.347816	-0.380776	1.74724	1.5492	1.64063
LYNX1-SLURP2	Nutlin-Activated	-0.572609	-0.530755	-0.692453	-0.600506	-0.683986	-0.583495	-0.485203	-0.471678	-0.305823	1.8387	1.39815	1.68966
MAMDC2	Nutlin-Activated	0.268376	-0.462672	-0.0635066	-0.255697	-0.522736	-1.03613	-0.748816	-0.771125	-0.771044	0.898064	2.33976	1.12553
MDM2	Nutlin-Activated	-0.623836	-0.606593	-0.610815	-0.586586	-0.57908	-0.559777	-0.484923	-0.448436	-0.444124	1.46824	1.58509	1.89084
MICALL1	Nutlin-Activated	-0.651959	-0.632994	-0.577936	-0.585603	-0.578426	-0.587815	-0.5222	-0.40305	-0.395073	1.39795	1.67863	1.85847
MMP1	Nutlin-Activated	-0.722983	-0.722875	-0.726754	-0.561345	-0.552732	-0.575837	-0.374387	-0.295418	-0.387224	1.5974	1.545	1.77716
MN1	Nutlin-Activated	-0.659333	-0.695522	-0.626486	-0.51575	-0.47505	-0.571933	-0.486614	-0.47387	-0.409586	1.60549	1.34613	1.96253
MRAS	Nutlin-Activated	-0.554366	-0.411052	-0.688451	-0.497661	-0.379485	-0.655774	-0.374895	-0.746055	-0.61701	1.64265	1.45967	1.82243
MUC2	Nutlin-Activated	-0.597002	-0.61342	-0.715034	-0.554107	-0.503145	-0.557844	-0.472249	-0.452033	-0.488231	1.49374	1.68377	1.77555
MYBPC3	Nutlin-Activated	-0.748572	-0.786844	-0.651492	-0.52482	-0.728272	-0.583569	-0.229858	-0.27886	-0.312932	1.26326	1.71978	1.86219
MYL2	Nutlin-Activated	-0.65673	-0.65673	-0.65673	-0.65673	-0.65673	-0.175634	0.502269	-0.65673	-0.65673	2.26914	0.478097	1.52324
MYMX	Nutlin-Activated	-0.44766	-0.579734	-0.579734	-0.579734	-0.579734	-0.434837	-0.579734	-0.25777	-0.579734	0.595219	1.81278	2.21067
MYO3B	Nutlin-Activated	-0.649568	-0.649568	-0.649568	-0.649568	-0.649568	0.354898	-0.649568	-0.649568	-0.091412	0.36857	1.7198	2.19512
NDRG2	Nutlin-Activated	-0.590258	-0.540193	-0.564312	-0.558437	-0.549735	-0.576786	-0.550544	-0.525392	-0.509514	1.53556	1.80645	1.62316
NECTIN4	Nutlin-Activated	-0.680898	-0.657841	-0.638205	-0.459693	-0.437469	-0.40893	-0.554628	-0.560963	-0.536563	1.39419	1.73113	1.80986
NID1	Nutlin-Activated	-0.773863	-0.773863	-0.303758	-0.0194382	-0.773863	-0.773863	-0.357252	-0.00534007	-0.773863	1.68016	2.08159	0.793351
NLRP1	Nutlin-Activated	-0.656877	-0.548897	-0.580021	-0.64411	-0.634936	-0.503281	-0.446872	-0.441083	-0.355521	0.963376	1.86778	1.98044
NPL	Nutlin-Activated	-0.686544	-0.736108	-0.654967	-0.558183	-0.545137	-0.371626	-0.667595	-0.298066	-0.408989	1.64072	1.7346	1.5519
NUPR1	Nutlin-Activated	-0.655586	-0.366378	-0.282242	-0.597321	-0.5538	-0.593477	-0.651942	-0.610574	-0.626078	1.54806	1.62215	1.76719
OR10H1	Nutlin-Activated	-0.633676	-0.732853	-0.194882	-0.810651	-0.601703	-0.551773	-0.654737	-0.451132	-0.235244	1.48536	1.47929	1.90201
OR1L8	Nutlin-Activated	-0.598311	0.027368	-0.410646	-0.980383	-0.529284	-0.142046	0.534334	-0.980383	-0.980383	0.719113	0.997119	2.3435
PAPPA	Nutlin-Activated	-0.552801	-0.706818	-0.706818	-0.153917	-0.706818	-0.368847	-0.503279	-0.519069	-0.143413	0.320895	1.68484	2.35605
PEX5L	Nutlin-Activated	-0.58421	-0.6614	-0.67382	-0.542079	-0.652071	-0.346042	-0.718259	-0.532319	-0.159619	1.36261	1.5337	1.97351
PGF	Nutlin-Activated	-0.689819	-0.737311	-0.708061	-0.693123	-0.541214	-0.565376	-0.318562	-0.24489	-0.412555	1.71244	1.54016	1.65831
PIDD1	Nutlin-Activated	-0.611402	-0.592402	-0.549838	-0.65536	-0.660517	-0.509266	-0.471514	-0.475016	-0.267799	0.958248	2.08592	1.74894
PLIN4	Nutlin-Activated	-0.608231	-0.595024	-0.518122	-0.552879	-0.618054	-0.505784	-0.580651	-0.51103	-0.380226	1.15433	1.65095	2.06472
PLK3	Nutlin-Activated	-0.602668	-0.638101	-0.667223	-0.602108	-0.599365	-0.571808	-0.428866	-0.409849	-0.423016	1.44698	1.74661	1.74942
PPBP	Nutlin-Activated	-0.528509	-0.679888	-0.574854	-0.619073	-0.586016	-0.699851	-0.362337	-0.54255	-0.322903	1.53772	1.45387	1.92439
PRDM1	Nutlin-Activated	-0.625738	-0.482628	-0.58518	-0.505987	-0.596226	-0.596314	-0.604328	-0.451955	-0.505164	1.52632	1.57428	1.85292
PRODH	Nutlin-Activated	-0.614999	-0.576034	-0.570016	-0.648291	-0.647654	-0.636684	-0.465933	-0.428834	-0.355074	1.49284	1.7985	1.65218
PSG6	Nutlin-Activated	-0.526203	0.932948	-0.774434	-0.429208	-0.631276	-0.658775	-0.584939	-0.618702	-1.01976	1.35859	1.10901	1.84275
PSTPIP2	Nutlin-Activated	-0.59497	-0.588754	-0.585126	-0.605641	-0.582087	-0.600664	-0.44893	-0.477374	-0.463689	1.40991	1.73729	1.80004
PTCHD4	Nutlin-Activated	-0.653357	-0.655688	-0.655688	-0.647321	-0.655688	-0.65313	-0.341504	-0.334649	-0.300447	1.36606	1.67266	1.85875
PXT1	Nutlin-Activated	0.0594726	-0.809122	-0.809122	0.23017	-0.809122	-0.809122	-0.809122	-0.809122	0.249915	2.08858	0.876733	1.34986
RBMS1	Nutlin-Activated	-0.558952	-0.311909	-0.532509	-0.728969	-0.42626	-0.713164	-0.633311	-0.480364	-0.445209	1.14221	1.57214	2.1163
RHBDL1	Nutlin-Activated	-0.643802	-0.773477	-0.714084	-0.513651	-0.432207	-0.294164	-0.428358	-0.631603	-0.480333	1.49136	1.87384	1.54648
RHCG	Nutlin-Activated	-0.498842	-0.581714	-0.586528	-0.594056	-0.541763	-0.616669	-0.510105	-0.487622	-0.548566	1.66748	1.75642	1.54196
RNASE7	Nutlin-Activated	-0.559246	-0.551911	-0.537007	-0.563726	-0.563726	-0.558811	-0.563726	-0.536426	-0.530956	1.49357	1.71418	1.75778
RPTN	Nutlin-Activated	-0.560492	-0.535036	-0.560492	-0.555873	-0.560492	-0.556256	-0.509477	-0.532259	-0.536958	1.20388	1.93706	1.7664
RRAD	Nutlin-Activated	-0.548816	-0.586984	-0.574019	-0.596807	-0.54931	-0.565261	-0.527193	-0.535536	-0.480431	1.78651	1.66238	1.51547
RRM2B	Nutlin-Activated	-0.661066	-0.646399	-0.648237	-0.594189	-0.592109	-0.587858	-0.420176	-0.397916	-0.380053	1.44411	1.59673	1.88717
S100Z	Nutlin-Activated	-0.602472	-0.268939	-0.602472	-0.602472	-0.602472	-0.32501	-0.602472	-0.294209	-0.294114	0.241246	2.66998	1.28341
SAA1	Nutlin-Activated	-0.599444	-0.583561	-0.61132	-0.479625	-0.429474	-0.498539	-0.583448	-0.578203	-0.594056	1.74711	1.48381	1.72675
SAA2	Nutlin-Activated	-0.611964	-0.59805	-0.605424	-0.511477	-0.456096	-0.47159	-0.569624	-0.541888	-0.56148	1.88074	1.74371	1.30314
SERPINE1	Nutlin-Activated	-0.634436	-0.56343	-0.566411	-0.635098	-0.585379	-0.617697	-0.543991	-0.385806	-0.411498	1.50808	1.57406	1.86161
SERPINF1	Nutlin-Activated	-0.55178	-0.561078	-0.255041	-0.581306	-0.583929	-0.484322	-0.478652	-0.401173	-0.476695	0.255541	2.40482	1.71361
SESN1	Nutlin-Activated	-0.65853	-0.669655	-0.635203	-0.656904	-0.641702	-0.644614	-0.33118	-0.326654	-0.354592	1.46354	1.70221	1.75328
SHANK1	Nutlin-Activated	-0.464292	-0.491271	-0.503635	-0.768123	-0.632143	-0.759007	-0.598127	-0.188266	-0.376113	1.00046	2.03517	1.74535
SHC4	Nutlin-Activated	-0.659576	-0.748063	-0.475691	-0.546619	-0.498762	-0.570553	-0.545455	-0.621257	-0.274333	1.69619	1.68545	1.55867
SLAMF7	Nutlin-Activated	-0.603974	-0.603974	-0.603974	-0.603974	-0.603974	-0.330775	-0.603974	0.00308	-0.603974	1.05753	1.00711	2.49087
SLC28A1	Nutlin-Activated	-0.770595	-0.770595	-0.770595	-0.770595	-0.496054	-0.260378	0.151271	-0.770595	-0.203566	2.0738	1.33556	1.25234
SLC52A1	Nutlin-Activated	-0.553955	-0.556812	-0.56124	-0.586373	-0.56998	-0.572332	-0.52882	-0.517442	-0.525996	1.61912	1.70949	1.64434
SORCS2	Nutlin-Activated	-0.527756	-0.500671	-0.443795	-0.443288	-0.545844	-0.581647	-0.575292	-0.543679	-0.543658	0.772973	1.65925	2.27341
SPATA18	Nutlin-Activated	-0.69503	-0.659515	-0.636288	-0.620966	-0.623953	-0.593765	-0.390999	-0.352756	-0.273087	1.1252	1.79672	1.92444
SPRR1B	Nutlin-Activated	-0.660509	-0.611317	-0.563769	-0.373489	-0.372774	-0.350938	-0.688306	-0.665765	-0.651233	1.67374	1.62835	1.63601
SPRR2D	Nutlin-Activated	-0.522893	-0.703193	-0.392363	-0.310922	-0.363842	-0.23465	-0.854067	-0.81147	-0.671861	1.68405	1.76185	1.41936
STEAP3	Nutlin-Activated	-0.636622	-0.49492	-0.454466	-0.70152	-0.642839	-0.661794	-0.603707	-0.331004	-0.384126	1.337	1.7422	1.8318
SUGCT	Nutlin-Activated	-0.548941	-0.551475	-0.546097	-0.562756	-0.54105	-0.57893	-0.559637	-0.539381	-0.524148	1.90543	1.51472	1.53227
TEPP	Nutlin-Activated	-0.0141896	-0.72293	-0.72293	0.125093	-0.72293	-0.72293	0.213666	-0.72293	-0.72293	0.065208	2.02826	1.91955
TEX48	Nutlin-Activated	-0.342274	-0.743378	-0.574572	-0.325805	-0.768779	-0.784148	-0.864388	-0.201399	-0.201159	1.77475	1.27456	1.75659
TG	Nutlin-Activated	-0.539887	-0.531095	-0.54041	-0.610994	-0.558796	-0.563744	-0.550457	-0.502404	-0.556511	1.87341	1.61232	1.46857
TGM5	Nutlin-Activated	-0.616428	-0.303107	-0.262153	-0.616428	-0.335925	-0.616428	-0.616428	-0.326846	-0.616428	2.55392	0.305812	1.45044
TIGAR	Nutlin-Activated	-0.687351	-0.690399	-0.675028	-0.662654	-0.608816	-0.618638	-0.400986	-0.237911	-0.315869	1.38838	1.77037	1.7389
TMEM211	Nutlin-Activated	-0.370328	-0.584237	-0.0618526	-0.43477	-0.812987	-0.481603	-0.58339	-0.806987	-0.0411959	0.223821	1.43954	2.51399
TMEM238L	Nutlin-Activated	-0.695364	-0.688408	-0.642881	-0.650867	-0.661122	-0.632844	-0.436301	-0.194993	-0.303341	1.50944	1.68188	1.7148
TMEM249	Nutlin-Activated	-0.815894	-0.481873	-0.527627	-0.265334	-0.703778	-0.323168	-0.769144	0.0135397	-0.784011	1.626	0.920283	2.111
TMEM40	Nutlin-Activated	-0.551673	-0.587972	-0.617987	-0.541959	-0.47289	-0.600312	-0.539343	-0.543111	-0.51586	1.64574	1.68337	1.642
TNFRSF10C	Nutlin-Activated	-0.681332	-0.683894	-0.666676	-0.568622	-0.569274	-0.580624	-0.459221	-0.327265	-0.385304	1.45285	1.58697	1.88239
TNFSF15	Nutlin-Activated	-0.640557	-0.502738	-0.488444	-0.599638	-0.611878	-0.498486	-0.563801	-0.47159	-0.454312	0.996656	1.80988	2.02491
TP53I3	Nutlin-Activated	-0.559805	-0.548673	-0.545285	-0.568745	-0.56698	-0.563111	-0.551714	-0.538093	-0.525995	1.5604	1.78623	1.62177
TP53INP1	Nutlin-Activated	-0.65988	-0.634865	-0.617322	-0.673973	-0.664709	-0.61668	-0.344026	-0.352584	-0.274567	1.1523	1.6646	2.02171
TREH	Nutlin-Activated	-0.555164	-0.589609	-0.601011	-0.592896	-0.593323	-0.613267	-0.525586	-0.435002	-0.428388	1.35409	1.71263	1.86752
TRIM22	Nutlin-Activated	-0.615772	-0.614894	-0.615446	-0.616055	-0.616088	-0.615505	-0.381841	-0.414493	-0.408552	1.24295	1.74266	1.91304
TRIM3	Nutlin-Activated	-0.752364	-0.624778	-0.526934	-0.495554	-0.577236	-0.427167	-0.466686	-0.577484	-0.432496	1.22261	2.03001	1.62808
TSPAN10	Nutlin-Activated	-0.65263	-0.609365	-0.252668	-0.723501	-0.726286	-0.779506	-0.376583	-0.291383	-0.462515	1.44931	1.52093	1.90419
TSPEAR	Nutlin-Activated	-0.607924	-0.557647	-0.48602	-0.614136	-0.566129	-0.548806	-0.530434	-0.501413	-0.526326	1.4895	1.49333	1.956
TUBA4B	Nutlin-Activated	-0.634366	-0.634366	0.0722046	-0.445382	-0.634366	-0.461086	-0.634366	-0.634366	-0.441791	1.4733	2.43118	0.5434
UNC13A	Nutlin-Activated	-0.573766	-0.498839	-0.503605	-0.599901	-0.620759	-0.556879	-0.494132	-0.535588	-0.425111	0.925323	1.99258	1.89067
USP2	Nutlin-Activated	-0.602066	-0.614257	-0.630444	-0.693413	-0.636155	-0.656918	-0.4373	-0.341228	-0.312759	1.74517	1.44758	1.73179
XG	Nutlin-Activated	-0.60012	-0.515687	-0.557725	-0.634797	-0.686436	-0.686436	-0.572371	-0.633832	0.0502447	1.28125	1.88234	1.67357
ZMAT3	Nutlin-Activated	-0.689985	-0.672644	-0.668131	-0.649401	-0.648826	-0.639727	-0.333824	-0.288886	-0.298765	1.37299	1.66237	1.85483
ZNF219	Nutlin-Activated	-0.604638	-0.598923	-0.537733	-0.632198	-0.596207	-0.616374	-0.509387	-0.435344	-0.431369	1.61887	1.61316	1.73014
ZNF423	Nutlin-Activated	-0.57829	-0.531915	-0.56438	-0.606609	-0.573175	-0.544472	-0.531762	-0.43402	-0.572082	1.84975	1.33548	1.75148
ZNF561	Nutlin-Activated	-0.588678	-0.505692	-0.53999	-0.553711	-0.574737	-0.524268	-0.646464	-0.497943	-0.488331	1.28713	1.68379	1.9489
ACBD7	Nutlin-Repressed	0.712159	0.542797	0.818586	0.54961	0.647078	0.244548	0.291979	0.490564	0.613056	-1.70307	-1.5726	-1.63471
ACP3	Nutlin-Repressed	0.0936101	0.222902	0.636236	0.388746	0.487023	0.291157	0.574257	1.09893	0.966493	-1.4301	-1.71453	-1.61472
AGR3	Nutlin-Repressed	0.146492	0.354244	0.266443	0.732585	0.963778	1.19462	0.547902	0.256059	0.263371	-1.60456	-1.62951	-1.49143
ANLN	Nutlin-Repressed	0.957849	1.08334	1.08847	-0.113895	-0.0963923	-0.0857623	0.113252	0.754506	0.73745	-1.49841	-1.48381	-1.45658
APOBEC3B	Nutlin-Repressed	1.17184	0.794088	0.818413	-0.177011	-0.046558	-0.190364	0.382667	1.04456	0.650049	-1.44068	-1.50533	-1.50167
ARHGAP11A	Nutlin-Repressed	1.11267	0.911299	0.81614	0.0764609	0.0378295	0.11912	0.346596	0.569703	0.693453	-1.62105	-1.5627	-1.49952
ARHGAP33	Nutlin-Repressed	1.27363	0.647866	1.18236	-0.0169897	-0.195106	0.29786	0.251387	0.29567	0.746709	-1.61864	-1.40504	-1.4597
ASF1B	Nutlin-Repressed	0.56633	0.7396	0.699877	-0.513816	-0.407784	-0.501806	0.484299	1.39441	1.37221	-1.29032	-1.27867	-1.26432
ASPM	Nutlin-Repressed	0.483646	1.18704	1.22374	-0.0644919	-0.0539116	0.23575	-0.159554	0.475693	1.05947	-1.52686	-1.43253	-1.42799
AURKA	Nutlin-Repressed	1.05747	0.766523	0.823958	0.339983	0.32193	0.152652	0.128635	0.601878	0.593146	-1.65988	-1.56956	-1.55673
AURKB	Nutlin-Repressed	1.3447	0.661662	0.647031	-0.0789004	-0.0874061	-0.0550213	0.621905	0.618155	0.852229	-1.50963	-1.50696	-1.50776
BIRC5	Nutlin-Repressed	1.13445	0.580324	0.575015	-0.238847	-0.132853	-0.239241	0.645849	1.07441	0.977865	-1.45799	-1.45887	-1.46011
BUB1	Nutlin-Repressed	1.15531	0.825282	0.92249	0.305329	0.329818	0.338644	0.0373117	0.451889	0.369204	-1.58857	-1.58224	-1.56447
BUB1B	Nutlin-Repressed	0.723941	1.10642	0.992653	-0.21749	-0.28245	-0.171872	0.0509995	0.88574	1.15261	-1.41772	-1.41554	-1.40728
C18orf54	Nutlin-Repressed	0.522543	0.815455	0.942772	-0.318317	-0.307143	-0.383125	0.138437	1.04296	1.54521	-1.28082	-1.32795	-1.39002
C5AR1	Nutlin-Repressed	-0.42284	0.126047	-0.12293	1.02719	1.28365	1.40244	0.78267	-0.0674964	0.0233584	-1.57857	-1.24988	-1.20363
C9orf24	Nutlin-Repressed	0.96642	1.12856	0.635637	-0.0838175	-0.167925	-0.278242	0.99484	0.397386	0.784304	-1.66772	-1.17987	-1.52957
CA8	Nutlin-Repressed	1.00704	0.92957	1.66996	0.454685	-0.0629231	-0.0432846	-0.418395	0.018976	0.554604	-1.34965	-1.32798	-1.4326
CA9	Nutlin-Repressed	1.07606	1.06118	1.11548	-0.323829	-0.270477	-0.400857	0.667262	0.684901	0.587782	-1.39218	-1.41036	-1.39496
CCDC85A	Nutlin-Repressed	0.717121	1.08471	1.64405	1.08776	0.0592861	0.172807	-0.0211621	-0.399677	-0.484758	-1.20591	-1.23285	-1.42138
CCNA2	Nutlin-Repressed	1.27002	0.655618	0.721817	-0.0255863	0.0801007	0.027377	0.491428	0.7436	0.675744	-1.53951	-1.5632	-1.53741
CCNB1	Nutlin-Repressed	1.20308	0.925053	0.792928	0.108048	0.191498	0.185393	0.0787899	0.685418	0.497322	-1.54585	-1.55956	-1.56213
CCNB2	Nutlin-Repressed	1.24832	0.680127	0.84412	0.083255	0.256736	0.0845997	0.377724	0.624829	0.509545	-1.59603	-1.54167	-1.57157
CDC20	Nutlin-Repressed	1.26551	0.598569	0.699584	0.412357	0.288366	0.295776	0.28886	0.504868	0.443988	-1.56813	-1.61567	-1.61408
CDC25C	Nutlin-Repressed	1.23329	0.62424	0.680968	0.235894	0.640814	0.474426	0.412608	0.222261	0.263854	-1.58341	-1.63362	-1.57133
CDCA2	Nutlin-Repressed	1.12845	0.739078	0.806561	0.16842	-0.000735932	0.113761	0.355004	0.714752	0.681937	-1.58741	-1.56651	-1.55331
CDCA3	Nutlin-Repressed	0.689884	0.7639	1.04604	-0.192846	-0.167855	0.0718051	0.307886	0.827108	1.13796	-1.49192	-1.50622	-1.48574
CDCA5	Nutlin-Repressed	0.997229	0.756015	0.680114	-0.134573	-0.177717	-0.293132	0.45952	1.13114	0.966666	-1.45042	-1.48024	-1.45461
CDCA8	Nutlin-Repressed	1.31056	0.73337	0.538774	0.0492967	-0.00714979	-0.0846138	0.623552	0.79119	0.635904	-1.53846	-1.5237	-1.52872
CDK1	Nutlin-Repressed	1.11883	0.724714	0.705979	-0.0505882	-0.00240597	-0.0653915	0.576982	0.818977	0.786262	-1.54918	-1.55813	-1.50605
CDKL2	Nutlin-Repressed	0.109299	0.841702	0.578913	0.455059	0.872109	0.332361	0.731127	0.432651	0.505276	-1.59853	-1.73076	-1.5292
CDKN2C	Nutlin-Repressed	0.543368	0.758823	1.19332	0.0629889	0.023428	-0.206496	0.234325	0.84028	1.05846	-1.49003	-1.49016	-1.5283
CDKN3	Nutlin-Repressed	1.03213	0.595806	0.463971	0.234998	0.298867	0.0483101	0.581265	0.891727	0.647613	-1.56167	-1.61014	-1.62289
[truncated: 123 more rows]
