# Supplementary material for: Comprehensive Genomic Dependency Landscape of Human Colon Cancer
Source: Research Square preprint supplement (doi:10.21203/rs.3.rs-4438536/v1), 2024-06-04
Supplement: Supplementary file 2 [file b46bd6b25319d3b50f11f26a.xlsx]

## Sheet: Library 1_gRNAs
Gene Name	gRNA Sequence
BAALC	GTCCAGCTCTCGTAGTAGCG
BAALC	TGGGTTGGGTATTCCACCTG
BMP5	AGCTGAATTCCGGATATACA
BMP5	CTAGTGGGTTATGCAAAAGG
BRF1	AAGCGTGGAATATACAGGCA
BRF1	GAGGCAGGCAGCAATCACGT
BRF1	TGTACACCTAGGCTCCACCG
CCNJL	TGGAGCAAATAAACAGCACG
CCNJL	TTCGCTTACTTGCAAGCAGG
CDK5RAP3	CAAAGAGAAGATGGTTACCA
CDK5RAP3	GTGGGGTCGTTCCACCACAG
EYA4	AGTTCTGGGTCAAAGTCCAG
EYA4	TTATGCACAGAAGTATGGCA
FKBP9	AGTCGAACTTCTGGCCGTCG
FKBP9	CAGACACCTGGATGGTCCGA
FKBP9	GTGAGCGGATAAGTCAAAGT
GATA6	CCCCTACTCGCCCTACGTGG
GATA6	CGGGACGCCTCAGCTCGACA
GDF7	GCCCGCGAGTACAGCAGGCG
GDF7	GTCCGCGCGACCATGGCCCG
GDNF	GCCAACCCAGAGAATTCCAG
GDNF	TTGCAGTTAAGACACAACCC
GNAQ	ATCTTGTTGCGTAGGCAGGT
GNAQ	TTGCAGAATGGTCGATGTAG
HSP90AB1	ACTCTTCTAGGTGAGCCCAT
HSP90AB1	CATTAGAGATCAACTCCCGA
HSPA5	AATGGCAAGGAACCATCCCG
HSPA5	CAGACGGGTCATTCCACGTG
HSPA5	GGTGAGAAGAGACACATCGA
KIF5B	CATATGGACAAACATCCTCT
KIF5B	TCCTGCGGAACACTATTCAG
LGR6	ACTGTCTCACAATCAAATTG
LGR6	CCTACCACAAACTTGACCGG
LGR6	TCCCAGAAAAGGCCTTCATG
MDM2	CAACATCTGTTGCAATGTGA
MDM2	GAGAACATTACCGGATTCGA
MDM2	TACCATGATCTACAGGAACT
Non-Targeting-Control	AACGCTGTCGTACGTGTATA
Non-Targeting-Control	CTTCGACGCCATCGTGCTCA
Non-Targeting-Control	TAAGATCCGCGGGTGGCAAC
Non-Targeting-Control	TTCGGAACTTACTCAGGGTA
PAK6	GGGCACCCTTGGCAACCGTG
PAK6	TCTGAGCGCACTGACCCCCA
PIK3CB	AAAAATGCGCAAATTCAGCG
PIK3CB	TAAAACCATCGTAAGCTCAG
PIK3R4	ACTGGCAAATTCGTAAACAT
PIK3R4	TAAATATTGATATCATTACG
PPM1D	AGCACAAGTATATTATATTG
PPM1D	CTGAAGAAAAGCCCTCGCCG
PPM1D	GCCAGTGTGGTCATCATTCG
PPP1R13L	ACTCTCTGATCGTCCGAACG
PPP1R13L	GACCTTGTAATTGCGCGGCA
PPP3CB	GATGTCAAGCGATGTGTTGG
PPP3CB	TGCGCTTAGAATTATCAATG
PTPN6	CCAGCCGTACTATGCCACGA
PTPN6	CGGCCCAGTCGCAAGAACCA
PTPN6	TCACGCACAAGAAACGTCCA
PTPRB	AGTATGTCATGGATGACACG
PTPRB	TCTTGTCTTGACGATTAGCG
RDH14	AGTTCGGAGTGAACCATCTG
RDH14	GAAACTACCACAATCCTGCT
RDH14	GCACAGTCTTCCCGTGCATG
SGK1	AACTTACTGTTTGCATGCAT
SGK1	AGACTACATTAATGGTGGAG
SGK1	GGCATGGTGGCAATTCTCAT
SMAD3	CTACCTGGAATATTGCTCTG
SMAD3	TCCCCAGCACATAATAACTT
SOX2	ATTATAAATACCGGCCCCGG
SOX2	CGTTCATCGACGAGGCTAAG
SS18L1	ATCCTGGAGTACCAGAGCAA
SS18L1	CCCACGCAGAACATGAACCT
SS18L1	CGCCGAGCTGTAGTGCGACG
STAMBP	AAGGCCAGCTAAGCCACCTG
STAMBP	GAGTTTGGGAAGGTAGACCC
STK17B	CAGCCAACTCAGGTAAACAC
STK17B	TTACATCTAAAGAGCTAGGG
TCF21	GACTTCCAACGAGAGCACCG
TCF21	GTTGAAAATGGATTCGAACA
TET3	AATGCCCTGACTACCTCGAG
TET3	GTGACTCCAAGAAGCCACTG
TOP2B	ATCAACGTGTAGAGCCTGAG
TOP2B	ATGATTATGACCGATCAGGT
TP73	AGAGATTATTGCCTTCCACG
TP73	CATGCCTGTTTACAAGAAAG
VCP	AATGAGACTCACGGGCATGT
VCP	GTAACCTGGGAAGACATCGG
VCP	GTTTGCCGTACTTCACATCA
XPO5	AAGTAAAGATACTCACTGTG
XPO5	AGAGACATTAGTAAGGACGC
XPO5	TCTTCAACTCAGATGACTTG

## Sheet: Library 2_gRNAs
Gene Name	gRNA Sequence
BMP5	CTAGTGGGTTATGCAAAAGG
BMP5	AGCTGAATTCCGGATATACA
SMAD3	TCCCCAGCACATAATAACTT
SMAD3	CTACCTGGAATATTGCTCTG
TOP2B	ATCAACGTGTAGAGCCTGAG
TOP2B	ATGATTATGACCGATCAGGT
CCNJL	TGGAGCAAATAAACAGCACG
CCNJL	TTCGCTTACTTGCAAGCAGG
SGK1	GGCATGGTGGCAATTCTCAT
SGK1	AACTTACTGTTTGCATGCAT
PIK3CB	TAAAACCATCGTAAGCTCAG
PIK3CB	AAAAATGCGCAAATTCAGCG
PPM1D	CTGAAGAAAAGCCCTCGCCG
PPM1D	AGCACAAGTATATTATATTG
MDM2	CAACATCTGTTGCAATGTGA
MDM2	TACCATGATCTACAGGAACT
XPO5-COMMON ESSENTIAL	AAGTAAAGATACTCACTGTG
XPO5-COMMON ESSENTIAL	AGAGACATTAGTAAGGACGC
NON TARGETING CONTROL	TAAGATCCGCGGGTGGCAAC
NON TARGETING CONTROL	CTTCGACGCCATCGTGCTCA
CDKN1C	GTCCCTCGACGGCCTCGAGG
CDKN1C	GCTGGAAGTCGTAATCCCAG
TP53BP1	GAAGCCCATTAGTCCTGTCA
TP53BP1	GGAATCAATACTAATCACAC
PIM1	AAGGACCGGATTTCCGACTG
PIM1	GTCCAGGAGCCTAATGACGC
SETD5	GTGCCCTTTACGTATCACAA
SETD5	AGGTTATTAGACTTCATCGG
TP53	GAGCGCTGCTCAGATAGCGA
TP53	GATCCACTCACAGTTTCCAT
