# Supplementary material for: Comprehensive Genomic Dependency Landscape of Human Colon Cancer
Source: Research Square preprint supplement (doi:10.21203/rs.3.rs-4438536/v1), 2024-06-04
Supplement: Supplementary file 3 [file c21a86447c0fdfbc274c51e9.xlsx]

## Sheet: Sheet1
Probeset ID	Target Gene Symbol	Category	DepMap Common Essential Gene?	Normalized count frequency_TP53AV-Day0	Normalized count frequency_TP53AV-Day7-Rep-1	Normalized count frequency_TP53AV-Day7-Rep-2	Normalized count frequency_TP53AV-Day7-Rep-3	Normalized count frequency_TP53AV-Day7-Rep-4	Normalized count frequency_TP53AV-Day21-Rep-1	Normalized count frequency_TP53AV-Day21-Rep-2	Normalized count frequency_TP53AV-Day21-Rep-3	Normalized count frequency_TP53AV-Day21-Rep-4	Normalized count frequency_TP53AV-Day36-Rep-1	Normalized count frequency_TP53AV-Day36-Rep-2	Normalized count frequency_TP53AV-Day36-Rep-3	Normalized count frequency_TP53AV-Day36-Rep-4	Normalized count frequency_EAV-Day0	Normalized count frequency_EAV-Day7-Rep-1	Normalized count frequency_EAV-Day7-Rep-2	Normalized count frequency_EAV-Day7-Rep-3	Normalized count frequency_EAV-Day7-Rep-4	Normalized count frequency_EAV-Day21-Rep-1	Normalized count frequency_EAV-Day21-Rep-2	Normalized count frequency_EAV-Day21-Rep-3	Normalized count frequency_EAV-Day21-Rep-4	Normalized count frequency_EAV-Day36-Rep-1	Normalized count frequency_EAV-Day36-Rep-2	Normalized count frequency_EAV-Day36-Rep-3	Normalized count frequency_EAV-Day36-Rep-4	log fold change_TP53AV-Day21-Rep-1	log fold change_TP53AV-Day21-Rep-2	log fold change_TP53AV-Day21-Rep-3	log fold change_TP53AV-Day21-Rep-4	log fold change_TP53AV-Day36-Rep-1	log fold change_TP53AV-Day36-Rep-2	log fold change_TP53AV-Day36-Rep-3	log fold change_TP53AV-Day36-Rep-4	log fold change_EAV-Day21-Rep-1	log fold change_EAV-Day21-Rep-2	log fold change_EAV-Day21-Rep-3	log fold change_EAV-Day21-Rep-4	log fold change_EAV-Day36-Rep-1	log fold change_EAV-Day36-Rep-2	log fold change_EAV-Day36-Rep-3	log fold change_EAV-Day36-Rep-4	average_log fold change_TP53AV_D21 and D36	average_log fold change_EAV_D21 and D36	T-test_EAV_early vs late_normalized frequency	T-test_TP53AV_early vs late_normalized frequency
CTGCGAGCCACCTACCGCGA	PHOSPHO1	Not Significant in Both and Not Common Essential	No	0.358243	0.0785137	0.0677716	0.0421583	0.219085	0.0021933	0.00179524	0.000197408	2.51831	0.000213778	0.000183759	0.00369131	2.62108	0.358243	0.0862869	0.217871	0.124464	0.273056	0.000209542	0.000182687	0.00018746	0.000176006	0.000145966	0.000134751	0.000168232	0.00017354	-1.55385	-1.57693	-2.32952	1.0605	-2.56498	-2.5668	-1.0577	1.07787	-2.61467	-3.07649	-2.82214	-3.19072	-2.77169	-3.20867	-2.86914	-3.19685	-1.18893	-2.9688	0.0126844	0.284774
AGCACTTTGACTTGAATCTG	WDR46	DepMap Common Essential	Yes	0.446034	0.576905	0.410018	0.263489	0.579276	0.0021933	0.00359049	2.0333	0.000244022	0.00213778	0.00183759	2.71127	0.00428632	0.446034	1.25276	0.168072	0.131192	0.0753259	0.000209542	0.000182687	0.00018746	0.000176006	0.000145966	0.000134751	0.000168232	0.00017354	-2.42001	-2.05765	0.887439	-3.37546	-2.43114	-2.34855	1.01241	-2.1308	-3.7766	-2.96379	-2.845	-2.63142	-3.93362	-3.09596	-2.892	-2.63754	-1.60797	-3.09699	0.131411	0.735137
TACCTCCTGTACAATAAGCT	TTPA	Not Significant in Both and Not Common Essential	No	0.519665	0.331123	0.742099	0.611295	0.464164	0.500072	0.132848	1.38186	0.000244022	0.292876	0.301364	2.06344	0.00214316	0.519665	1.40616	0.301906	0.703055	1.10164	0.000209542	0.000182687	0.00018746	0.000176006	0.000145966	0.000134751	0.000168232	0.00017354	0.179043	-0.747107	0.354213	-3.27924	-0.0533056	-0.39137	0.528341	-2.33562	-3.82676	-3.21816	-3.57408	-3.79651	-3.98378	-3.35034	-3.62108	-3.80264	-0.718131	-3.64667	0.0155265	0.856921
GGGCCGAGCCTAGCACAGTG	PIF1	Not Significant in Both and Not Common Essential	No	0.430458	0.122891	0.243978	0.614809	1.63386	0.00021933	0.0736049	1.80431	0.285506	0.00213778	0.0275638	2.41412	0.0192884	0.430458	0.172574	0.248995	0.19847	0.555528	0.000209542	0.000182687	0.00018746	0.000176006	0.000145966	0.000134751	0.000168232	0.00017354	-2.74842	-0.520444	0.467571	-0.7576	-1.75956	-0.947012	0.594019	-1.92792	-2.9157	-3.13448	-3.02479	-3.49918	-3.07272	-3.26666	-3.07179	-3.50531	-0.94992	-3.18633	0.0122109	0.944634
GTCCGTGTGAGACTGCTAAG	HTRA2	Not Significant in Both and Not Common Essential	No	0.17983	0.279918	0.101657	0.105396	0.245078	0.0109665	2.38767	0.0118445	0.590533	0.000213778	1.36533	0.00184565	0.0685811	0.17983	0.143812	0.130722	0.0134556	0.288749	0.000209542	0.000182687	0.00018746	0.000176006	0.000145966	0.000134751	0.000168232	0.00017354	-1.40696	1.37084	-0.949307	0.38194	-3.11707	1.1281	-1.75667	-0.5531	-2.83652	-2.85464	-1.85599	-3.21499	-2.99354	-2.98682	-1.90299	-3.22112	-0.612779	-2.73333	0.0269155	0.273903
AGTACCTCGAATATGAACGC	IRF2BP1	Not Significant in Both and Not Common Essential	No	1.07898	0.365259	1.56891	0.382938	0.222799	0.18643	1.86346	0.0513261	0.33431	0.0149645	1.32674	0.00553696	0.484354	1.07898	1.21441	0.367268	0.0504585	0.568083	0.000209542	0.000182687	0.00018746	0.000176006	0.000145966	0.000134751	0.000168232	0.00017354	-0.292085	0.074722	-0.87279	0.176236	-1.38754	-0.0728122	-1.83986	0.33725	-3.76309	-3.30328	-2.43003	-3.50888	-3.92011	-3.43545	-2.47703	-3.51501	-0.484609	-3.29411	0.0395203	0.604269
AAAACAAGTCCAGCTAGAGC	GOLGA6C	Not Significant in Both and Not Common Essential	No	0.935964	0.733932	0.653996	0.597243	0.824355	1.69103	0.0646287	0.185564	0.143973	1.76581	0.0716659	0.175337	0.0621516	0.935964	0.201336	0.208533	0.380121	0.721873	0.000209542	0.000182687	0.00018746	0.000176006	0.000145966	0.000134751	0.000168232	0.00017354	0.362495	-1.00515	-0.507657	-0.757833	0.381288	-0.960263	-0.532277	-1.12266	-2.98265	-3.05747	-3.30701	-3.61293	-3.13967	-3.18964	-3.35401	-3.61906	-0.517757	-3.28281	0.0286148	0.423647
GCCGCGTTGTTCTTGGTGAG	GPR12	Not Significant in Both and Not Common Essential	No	0.315764	0.3755	0.182983	0.0878298	0.326771	0.99795	0.000179524	0.00592224	0.256223	2.57817	0.00183759	0.000184565	0.231461	0.315764	0.121441	0.949293	0.0807336	0.254225	0.000209542	0.000182687	0.00018746	0.000176006	0.000145966	0.000134751	0.000168232	0.00017354	0.424499	-3.00829	-1.17116	-0.105625	0.836702	-1.99816	-2.67749	-0.149766	-2.76309	-3.71569	-2.63415	-3.15969	-2.92011	-3.84787	-2.68115	-3.16582	-0.981161	-3.11095	0.0937543	0.461082
CGCGTTCTATCACATTGTAG	B3GALNT1	Not Significant in Both and Not Common Essential	No	0.342667	0.296987	0.633665	0.091343	0.155959	0.0394793	1.43619	0.00197408	0.000244022	0.00213778	2.56711	0.000184565	0.000214316	0.342667	0.0958743	0.168072	0.333026	0.106712	0.000209542	0.000182687	0.00018746	0.000176006	0.000145966	0.000134751	0.000168232	0.00017354	-0.876368	0.355352	-1.66531	-2.80558	-2.14277	0.607585	-2.69453	-2.86196	-2.66043	-2.96379	-3.24957	-2.78269	-2.81745	-3.09596	-3.29657	-2.78881	-1.51045	-2.95691	0.0178914	0.586457
ACTAGCAAAGAACCATCCAT	DMXL1	Not Significant in Both and Not Common Essential	No	0.389395	0.682728	0.162652	0.091343	0.352764	2.3556	1.01252	0.00197408	0.302587	2.67223	1.77695	0.00738262	0.201457	0.389395	0.0703078	0.0342368	0.312843	0.216562	0.000209542	0.000182687	0.00018746	0.000176006	0.000145966	0.000134751	0.00168232	0.00017354	0.537854	0.794144	-1.66531	-0.066634	0.592626	1.03842	-1.09246	-0.243302	-2.52573	-2.27279	-3.22242	-3.09005	-2.68275	-2.40496	-2.26942	-3.09618	-0.0130839	-2.69554	0.0401378	0.115329
TTTGGAATGAGCCAAGTCGT	PNLIP	Not Significant in Both and Not Common Essential	No	0.229389	0.0819273	0.0609945	0.0843166	0.0371331	2.20207	0.00179524	0.000197408	0.000244022	1.73588	0.00183759	0.000184565	0.000214316	0.229389	0.162986	0.136947	0.131192	0.100435	0.000209542	0.000182687	0.00018746	0.000176006	0.000145966	0.000134751	0.000168232	0.00017354	1.4294	-1.53117	-2.63055	-2.18233	1.32609	-1.52104	-2.65976	-2.23871	-2.89088	-2.87484	-2.845	-2.75636	-3.0479	-3.00702	-2.892	-2.76249	-1.25101	-2.88456	0.00219026	0.266377
GCTGACCACCTCTTCAGACT	LMNA	Not Significant in Both and Not Common Essential	No	0.208149	0.931924	0.132155	0.772902	0.0891194	0.0021933	0.000179524	1.68586	0.00244022	0.000213778	0.00367518	2.18525	0.000214316	0.208149	0.284427	0.158734	0.255656	0.0313858	0.000209542	0.000182687	0.00018746	0.000176006	0.000145966	0.000134751	0.000168232	0.00017354	-2.62828	-2.86696	0.338697	-1.56254	-3.63942	-1.5558	0.451377	-2.61892	-3.1327	-2.93896	-3.13475	-2.25121	-3.28972	-3.07114	-3.18175	-2.25733	-1.76023	-2.90719	0.0135837	0.876682
ACTCAAAGAAGTGGGCGCTG	DDT	Not Significant in Both and Not Common Essential	No	0.430458	0.372087	0.528619	0.379425	0.352764	4.70681	0.359049	0.00592224	0.0732066	3.30288	0.0790163	0.00369131	0.0150021	0.430458	0.5337	0.435741	0.161467	0.357798	0.000209542	0.000182687	0.0018746	0.000176006	0.000145966	0.000134751	0.000168232	0.00017354	1.10208	-0.167989	-1.80664	-0.682934	0.948248	-0.825426	-2.01195	-1.37133	-3.40603	-3.37752	-1.93518	-3.30811	-3.56305	-3.5097	-2.98218	-3.31424	-0.601992	-3.1745	0.00352091	0.351102
TCCATATTTCCCAGTAAACG	ARRDC4	Not Significant in Both and Not Common Essential	No	0.301604	1.31084	0.111823	0.83614	0.0556996	1.03304	0.00718097	1.56742	0.000244022	0.818771	0.00183759	0.369131	0.000214316	0.301604	0.131028	0.217871	0.0941892	0.0972959	0.000209542	0.000182687	0.00018746	0.000176006	0.000145966	0.000134751	0.000168232	0.00017354	-0.103433	-1.19235	0.272906	-2.35842	-0.204387	-1.78428	-0.355098	-2.4148	-2.79609	-3.07649	-2.70109	-2.74257	-2.95311	-3.20867	-2.74809	-2.74869	-1.01748	-2.87185	0.0137423	0.883034
TTTGTAGGTGGAAGATCGAA	SPDL1	DepMap Common Essential	Yes	0.380899	0.157027	0.243978	0.179173	0.0556996	0.00021933	1.48646	0.000197408	0.00488044	0.000213778	2.17754	0.00369131	0.000214316	0.380899	0.0894827	0.270782	0.1211	0.0659101	0.000209542	0.000182687	0.00018746	0.000176006	0.000145966	0.000134751	0.000168232	0.00017354	-2.85488	0.784803	-2.95791	-1.05739	-2.86601	0.950615	-1.68609	-2.4148	-2.63047	-3.17091	-2.81024	-2.57342	-2.78749	-3.30309	-2.85724	-2.57955	-1.51271	-2.83905	0.0373937	0.436763
CGGCAGCAGTACGTCCAGCG	CCDC85C	Not Significant in Both and Not Common Essential	No	0.189741	0.0443773	0.0101657	0.168633	0.0594129	0.322415	0.00179524	0.767917	0.000244022	0.224467	0.00183759	2.33106	0.00214316	0.189741	0.0191749	0.208533	0.423851	0.0376629	0.000209542	0.000182687	0.00018746	0.000176006	0.000145966	0.000134751	0.000168232	0.00017354	0.861254	-0.753015	0.658372	-2.38645	0.703992	-0.742889	1.14061	-1.44283	-1.96146	-3.05747	-3.3543	-2.33039	-2.11848	-3.18964	-3.4013	-2.33651	-0.245119	-2.7187	0.0737385	0.244969
TCTTAAATATGGCATATCAA	CD1E	Not Significant in Both and Not Common Essential	No	0.511169	0.136546	0.623499	0.186199	0.334198	0.00021933	1.52237	0.000197408	0.0805273	0.00213778	1.9166	0.000184565	0.12216	0.511169	0.0894827	0.547789	0.211926	0.0502173	0.000209542	0.000182687	0.00018746	0.000176006	0.000145966	0.000134751	0.000168232	0.00017354	-2.79418	0.387684	-2.97461	-0.618061	-1.80532	0.487696	-3.00383	-0.437075	-2.63047	-3.47691	-3.05328	-2.45533	-2.78749	-3.60908	-3.10028	-2.46145	-1.34471	-2.94678	0.054362	0.748817
GTTAATCTGCCGGTCTGATG	CRADD	Not Significant in Both and Not Common Essential	No	0.29594	0.160441	0.182983	0.210792	0.675822	0.0657989	0.00538573	4.69634	0.0634457	0.0256534	0.00551276	5.967	0.0685811	0.29594	0.147007	0.233433	0.134556	0.17576	0.000209542	0.000182687	0.00018746	0.00176006	0.000145966	0.00134751	0.000168232	0.00017354	-0.387097	-1.53117	1.34791	-1.02743	-0.79617	-1.52104	1.4519	-0.993628	-2.84607	-3.10645	-2.85599	-1.99939	-3.00309	-2.23863	-2.90299	-3.00552	-0.432091	-2.74477	0.00278142	0.267747
AGGCGCCCCTTGCTTGAACG	CTH	Not Significant in Both and Not Common Essential	No	0.472938	0.334537	1.20295	0.17566	0.271072	0.0021933	1.71446	0.177667	0.0268424	0.000213778	1.54174	0.0387587	0.0600084	0.472938	0.94596	0.0684736	0.111009	0.6183	0.000209542	0.000182687	0.00018746	0.000176006	0.000145966	0.000134751	0.000168232	0.00017354	-2.18335	0.15388	0.00493389	-1.00426	-3.19448	0.107764	-0.656304	-0.654873	-3.6546	-2.57382	-2.77245	-3.54567	-3.81162	-2.70599	-2.81945	-3.5518	-0.928336	-3.17943	0.053572	0.887208
AAATAAAGCCCGTCAATCAG	TSGA10	Not Significant in Both and Not Common Essential	No	0.246381	0.146786	0.159263	0.15458	0.0148532	0.00877319	1.43081	0.00592224	0.00244022	0.0128267	2.0434	0.00369131	0.000214316	0.246381	0.639162	0.298794	0.117736	0.119266	0.000209542	0.000182687	0.00018746	0.000176006	0.000145966	0.000134751	0.000168232	0.00017354	-1.22353	0.953467	-1.41667	-0.784391	-1.05857	1.10824	-1.62197	-1.84077	-3.48434	-3.21366	-2.798	-2.83099	-3.64136	-3.34584	-2.845	-2.83712	-0.735523	-3.12454	0.0409977	0.345684
TGAGGTCCATATGTCGACTG	SYBU	Not Significant in Both and Not Common Essential	No	0.225141	0.986542	0.0982689	0.0983694	0.207945	2.04854	0.000179524	0.00394816	0.00244022	1.443	0.000183759	0.000184565	0.000214316	0.225141	0.13742	0.435741	0.225381	0.13182	0.000209542	0.000182687	0.00018746	0.000176006	0.000145966	0.000134751	0.000168232	0.00017354	0.317329	-2.73829	-1.39647	-1.93052	0.165151	-2.72817	-2.72671	-2.98689	-2.81678	-3.37752	-3.08001	-2.87445	-2.9738	-3.5097	-3.12701	-2.88058	-1.75307	-3.07998	0.0137403	0.741072
CAGAGGAATAAGCTCTACGA	PLK4	DepMap Common Essential	Yes	0.608872	0.433532	0.338858	0.284569	1.18083	0.313641	0.976612	0.0098704	0.805273	0.0256534	0.777299	0.000184565	0.576509	0.608872	0.5337	0.454416	1.16055	0.527281	0.000209542	0.000182687	0.00018746	0.000176006	0.000145966	0.000134751	0.000168232	0.00017354	-0.140588	0.459704	-1.45985	-0.166244	-1.22788	0.36057	-3.18804	-0.311381	-3.40603	-3.39575	-3.79176	-3.47651	-3.56305	-3.52792	-3.83876	-3.48264	-0.709213	-3.5603	0.00688003	0.549712
TATAGAAACACCTAATGTCA	SGCD	Not Significant in Both and Not Common Essential	No	0.644271	0.129718	0.233812	0.674533	0.969174	0.00438659	0.518825	1.67402	0.00244022	0.000213778	0.380381	0.869303	0.000214316	0.644271	0.188553	0.248995	0.356573	0.207146	0.000209542	0.000182687	0.00018746	0.000176006	0.000145966	0.000134751	0.000168232	0.00017354	-1.47087	0.346154	0.394757	-2.59897	-2.78304	0.211352	0.110168	-3.65535	-2.95416	-3.13448	-3.27924	-3.07075	-3.11118	-3.26666	-3.32624	-3.07688	-1.18072	-3.15245	0.0173096	0.711427
GGTAGCAGTTCTGACGACAG	SBNO1	DepMap Common Essential	Yes	0.91614	1.01726	2.67359	1.87956	1.09914	0.164497	1.97477	0.67711	2.27185	0.0277912	1.66853	0.223324	3.21045	0.91614	0.536896	1.58112	0.41376	0.364075	0.000209542	0.000182687	0.00018746	0.000176006	0.000145966	0.00134751	0.00168232	0.00017354	-0.791274	-0.131578	-0.443397	0.315327	-1.56352	-0.204761	-0.925121	0.465513	-3.40862	-3.93726	-3.34384	-3.31566	-3.56564	-3.06943	-2.39084	-3.32179	-0.409852	-3.29414	0.0281624	0.661887
GTTCCAGGAGAGATACGGAT	HACD4	Not Significant in Both and Not Common Essential	No	0.215229	0.228714	0.176206	0.375912	0.111399	0.00021933	1.32668	0.00789632	0.000244022	0.000213778	1.97357	0.000184565	0.00642947	0.215229	0.0415455	0.233433	0.0941892	0.081603	0.000209542	0.000182687	0.00018746	0.000176006	0.000145966	0.000134751	0.000168232	0.00017354	-3.01819	0.876745	-1.67766	-2.65945	-3.02933	1.04923	-3.30894	-1.23871	-2.29725	-3.10645	-2.70109	-2.66618	-2.45427	-3.23863	-2.74809	-2.67231	-1.62579	-2.73554	0.0255373	0.511837
GGAGGATGCCAATCACACAC	GPR151	Not Significant in Both and Not Common Essential	No	0.379483	0.638351	0.0847145	0.432123	0.237652	0.00877319	0.000179524	0.00197408	1.50318	0.000213778	0.000183759	0.000184565	1.80025	0.379483	0.156595	0.186746	0.067278	0.954128	0.000209542	0.000182687	0.00018746	0.000176006	0.000145966	0.000134751	0.000168232	0.00017354	-1.8619	-2.67384	-2.34024	0.80107	-3.4751	-2.66371	-3.36946	0.879391	-2.87351	-3.00954	-2.55496	-3.73408	-3.03053	-3.14172	-2.60196	-3.74021	-1.83797	-3.08581	0.0943367	0.839569
CACCGGAAGTGGCTGTCTCA	GOLGA8R	Not Significant in Both and Not Common Essential	No	0.345499	0.208232	0.728545	0.221331	0.148532	0.831259	0.0233382	0.00394816	0.000244022	2.4499	0.000183759	0.000184565	0.000214316	0.345499	0.201336	0.192971	0.178287	0.128682	0.000209542	0.000182687	0.00018746	0.000176006	0.000145966	0.000134751	0.000168232	0.00017354	0.601189	-1.49439	-1.74865	-2.78439	1.0706	-3.59821	-3.07889	-2.84077	-2.98265	-3.02378	-2.97821	-2.86399	-3.13967	-3.15596	-3.02521	-2.87012	-1.73419	-3.00495	0.00449551	0.804315
AATTTCTAGATTTAAGCGAG	MRPL39	DepMap Common Essential	Yes	0.226557	0.0921683	0.240589	1.05747	0.211659	0.00438659	0.323144	1.29302	0.00732066	0.000213778	0.022051	1.58173	0.000214316	0.226557	0.0894827	0.0653612	0.0605502	0.0533558	0.000209542	0.000182687	0.00018746	0.000176006	0.000145966	0.000134751	0.000168232	0.00017354	-1.32245	0.12812	0.0873372	-1.46109	-2.63462	-1.03785	0.174864	-2.99458	-2.63047	-2.55361	-2.50921	-2.48165	-2.78749	-2.68579	-2.55621	-2.48778	-1.13253	-2.58653	0.0381095	0.89701
GAAGTGTGAAAGCTGGTACG	PLEKHM3	Not Significant in Both and Not Common Essential	No	0.448866	0.320882	0.460847	0.765876	0.137392	0.859772	0.0879669	0.0394816	0.510006	0.983381	0.0294014	0.0129196	0.69224	0.448866	0.914002	0.174296	0.306115	0.122405	0.000209542	0.000182687	0.00018746	0.000176006	0.000145966	0.000134751	0.000168232	0.00017354	0.428038	-0.719237	-1.28776	0.569614	0.486376	-1.19519	-1.77291	0.702295	-3.63968	-2.97958	-3.21298	-2.84227	-3.7967	-3.11176	-3.25998	-2.8484	-0.348597	-3.21142	0.0504473	0.890831
AATGATACAAAAGTCAAGAG	MDC1	Not Significant in Both and Not Common Essential	No	0.242133	0.211646	0.132155	0.0210792	0.0556996	1.50021	0.00179524	0.000197408	0.000244022	1.6974	0.000183759	0.00184565	0.000214316	0.242133	0.067112	0.105823	0.205198	0.194592	0.000209542	0.000182687	0.00018746	0.000176006	0.000145966	0.000134751	0.000168232	0.00017354	0.850542	-1.86696	-2.02849	-2.35842	0.904174	-2.85683	-1.0577	-2.4148	-2.50553	-2.76287	-3.03926	-3.0436	-2.66255	-2.89505	-3.08626	-3.04973	-1.35356	-2.88061	0.00767974	0.345538
ATGATGTTTCTGGTCCCGCG	RSPH4A	Not Significant in Both and Not Common Essential	No	0.235053	0.0273091	0.250755	0.0948562	0.233938	0.00877319	4.46477	0.00394816	0.00488044	0.00427557	5.87293	0.00369131	0.00428632	0.235053	0.0862869	0.0186746	0.0807336	0.147513	0.00209542	0.000182687	0.00018746	0.000176006	0.000145966	0.00134751	0.000168232	0.00017354	-0.49315	1.25055	-1.38067	-1.68064	-0.805313	1.36961	-1.40989	-1.73702	-1.61467	-2.00954	-2.63415	-2.9233	-2.77169	-1.14172	-2.68115	-2.92943	-0.610815	-2.33821	0.0364644	0.229376
ATTGCTACAGTTGTGATTGG	IFI27	Not Significant in Both and Not Common Essential	No	0.635776	1.10602	0.694659	1.16989	1.38506	0.640443	0.000179524	1.91683	0.170815	0.31853	0.000183759	2.43442	0.730817	0.635776	0.252469	0.323693	0.659324	0.455094	0.000209542	0.000182687	0.00018746	0.000176006	0.00145966	0.000134751	0.000168232	0.00017354	-0.237282	-3.58765	0.214439	-0.908943	-0.540613	-3.57752	0.31825	-0.27766	-3.08094	-3.24843	-3.54619	-3.41257	-2.23796	-3.3806	-3.59319	-3.4187	-1.07462	-3.23982	0.00462403	0.545768
TCAGTGCCTCGACAGATCTG	ANKLE1	Not Significant in Both and Not Common Essential	No	0.342667	0.167268	1.02335	0.860732	0.616409	0.00021933	1.7719	0.325723	0.165935	0.000213778	0.852641	0.00553696	0.0535789	0.342667	0.220511	0.220983	0.632413	0.17576	0.000209542	0.000182687	0.00018746	0.000176006	0.000145966	0.000134751	0.000168232	0.00017354	-2.88231	0.238415	-0.42202	-0.569931	-2.89345	-0.079258	-2.1916	-1.06088	-3.02216	-3.08265	-3.52809	-2.99939	-3.17918	-3.21483	-3.57509	-3.00552	-1.23263	-3.20086	0.0187244	0.46677
AACCGACGATGACAAATACA	DOLPP1	Not Significant in Both and Not Common Essential	No	0.783038	3.35902	0.271087	0.34078	1.23282	0.00657989	2.17583	0.000197408	0.000244022	0.000213778	0.966571	0.000184565	0.000214316	0.783038	0.265252	0.152509	0.625685	0.301304	0.000209542	0.000182687	0.00018746	0.000176006	0.000145966	0.000134751	0.000168232	0.00017354	-2.70799	0.904516	-3.23711	-3.70347	-4.19625	0.552125	-3.26632	-3.75985	-3.10239	-2.92159	-3.52345	-3.23348	-3.25941	-3.05376	-3.57045	-3.23961	-2.42679	-3.23802	0.0233198	0.251414
AAGTCCCGCTTCTTCATGCG	PGRMC2	Not Significant in Both and Not Common Essential	No	0.516833	0.460841	0.511676	0.509413	0.556996	1.59453	0.531392	1.07587	0.383115	1.50072	0.00183759	1.19229	0.319331	0.516833	0.0766995	0.0964856	0.760241	0.119266	0.000209542	0.000182687	0.00018746	0.000176006	0.000145966	0.000134751	0.00168232	0.00017354	0.539082	0.01642	0.32469	-0.162523	0.512749	-2.44475	0.369312	-0.241611	-2.56352	-2.72275	-3.60804	-2.83099	-2.72054	-2.85493	-2.65504	-2.83712	-0.135829	-2.84912	0.0857974	0.178758
GTGGTATTTCAAGACAAACT	KDM4A	Not Significant in Both and Not Common Essential	No	0.257709	0.157027	0.267698	0.439149	0.126252	0.0021933	1.03945	0.690928	0.180576	0.000213778	1.00149	0.0867457	0.130733	0.257709	0.0830911	0.186746	0.87125	0.232255	0.000209542	0.000182687	0.00018746	0.000176006	0.000145966	0.000134751	0.000168232	0.00017354	-1.85488	0.589158	0.196821	0.155422	-2.86601	0.573001	-0.704364	0.015147	-2.59828	-3.00954	-3.66723	-3.12044	-2.7553	-3.14172	-3.71423	-3.12657	-0.486963	-3.14167	0.0796073	0.418077
TCTTACCCACAGATACGAAG	ZNF382	Not Significant in Both and Not Common Essential	No	0.386563	0.0170682	0.108435	0.196739	0.0816928	0.0021933	1.38593	0.000197408	0.000244022	0.000213778	1.69793	0.00184565	0.00214316	0.386563	0.140616	0.108935	0.55168	0.0408015	0.000209542	0.000182687	0.00018746	0.000176006	0.000145966	0.000134751	0.000168232	0.00017354	-0.89109	1.10657	-2.99853	-2.52475	-1.90222	1.19475	-2.02774	-1.58113	-2.82676	-2.77546	-3.46878	-2.36515	-2.98378	-2.90764	-3.51578	-2.37128	-1.20302	-2.90183	0.0631903	0.409196
TGAGAACCCTGACTTAGCCA	NCKAP1L	Not Significant in Both and Not Common Essential	No	0.712239	0.303814	0.843757	0.351319	0.920901	0.00021933	0.000179524	0.118445	2.00342	0.000213778	0.000183759	0.000184565	0.966564	0.712239	0.143812	0.407729	0.363301	0.17576	0.000209542	0.000182687	0.00018746	0.000176006	0.000145966	0.000134751	0.000168232	0.00017354	-3.14151	-3.67209	-0.472185	0.337559	-3.15264	-3.66197	-3.27955	0.0210177	-2.83652	-3.34866	-3.28736	-2.99939	-2.99354	-3.48084	-3.33436	-3.00552	-2.12767	-3.16078	0.0239671	0.42525
AGAAATCTTCAAATCGAAAG	SPATA31D1	Not Significant in Both and Not Common Essential	No	0.283196	0.682728	0.220258	0.0351319	0.932041	0.943118	0.000179524	0.000197408	0.929724	0.130405	0.00183759	0.000184565	1.06729	0.283196	0.124637	0.0342368	0.0033639	0.02197	0.000209542	0.000182687	0.00018746	0.000176006	0.000145966	0.000134751	0.000168232	0.00017354	0.140318	-3.08881	-2.25034	-0.00108098	-0.718953	-2.07868	-2.27955	0.0588474	-2.77438	-2.27279	-1.25393	-2.0963	-2.9314	-2.40496	-1.30093	-2.10243	-1.27728	-2.14214	0.146135	0.850085
CAACGCGGGTACGATGTCCG	CAAP1	Not Significant in Both and Not Common Essential	No	0.383731	0.184337	1.98232	0.274029	0.107686	0.0021933	1.52775	0.00197408	0.000244022	0.000213778	1.53622	0.000184565	0.000214316	0.383731	0.252469	0.211646	0.326298	0.166345	0.000209542	0.000182687	0.00018746	0.000176006	0.000145966	0.000134751	0.000168232	0.00017354	-1.92451	-0.113121	-2.14243	-2.64473	-2.93565	-0.11072	-3.17165	-2.7011	-3.08094	-3.0639	-3.24071	-2.97548	-3.23796	-3.19608	-3.28771	-2.98161	-1.96799	-3.13305	0.00236943	0.651477
TGTGGCCCCAGTTCTGAAAG	LCE3C	Not Significant in Both and Not Common Essential	No	0.315764	0.70321	0.921694	0.259976	0.118826	0.337768	2.10223	1.72337	0.0195218	0.391215	1.52704	0.616449	0.000214316	0.315764	0.488959	1.02088	0.0740058	0.188315	0.000209542	0.000182687	0.0018746	0.000176006	0.000145966	0.000134751	0.000168232	0.00017354	-0.318467	0.358093	0.821445	-0.784392	-0.25467	0.219264	0.374964	-2.74386	-3.368	-3.74727	-1.59636	-3.02936	-3.52502	-3.87944	-2.64336	-3.03549	-0.290952	-3.10304	0.0656546	0.277132
TATGCCATGATGGTATCCAT	MTHFSD	Not Significant in Both and Not Common Essential	No	0.346915	0.501805	1.56214	0.295108	0.0594129	0.0197397	3.35531	0.0098704	0.0195218	0.123992	3.14962	0.00738262	0.00428632	0.346915	0.0319581	0.236545	0.0975531	0.0690487	0.000209542	0.000182687	0.0018746	0.000176006	0.000145966	0.000134751	0.000168232	0.00017354	-1.40519	0.332013	-1.47565	-0.483361	-0.607141	0.304538	-1.60177	-1.1418	-2.18331	-3.11221	-1.71633	-2.59363	-2.34033	-3.24438	-2.76333	-2.59976	-0.759795	-2.56916	0.0569483	0.6414
GCCCACCACAGAGATAATGC	CLDN2	Not Significant in Both and Not Common Essential	No	0.382315	0.303814	1.46387	0.354832	0.163386	0.190817	1.94784	0.073041	1.46901	0.271499	0.520037	0.108894	1.22803	0.382315	0.23649	0.348593	0.168195	0.0313858	0.000209542	0.000182687	0.00018746	0.000176006	0.00145966	0.000134751	0.000168232	0.00017354	-0.201991	0.124051	-0.686456	0.95381	-0.0488395	-0.449468	-0.513019	0.875994	-3.05254	-3.28061	-2.9529	-2.25121	-2.20956	-3.41279	-2.9999	-2.25733	0.00676017	-2.80211	0.0213315	0.590737
AGTATCGGATGACTTTCAAG	ZC3H6	Not Significant in Both and Not Common Essential	No	0.489929	0.136546	0.0677716	0.0562111	0.0891194	0.00021933	0.00179524	0.000197408	1.61299	0.000213778	0.000183759	0.00369131	1.32233	0.489929	0.0607204	0.389055	0.131192	0.0627716	0.000209542	0.000182687	0.00018746	0.000176006	0.000145966	0.000134751	0.000168232	0.00017354	-2.79418	-1.57693	-2.45446	1.25766	-2.80532	-2.5668	-1.18264	1.17137	-2.46206	-3.3283	-2.845	-2.55224	-2.61908	-3.46048	-2.892	-2.55836	-1.36891	-2.83969	0.0640182	0.454674
CAAAAACAGGAGGGTCCCAA	SECTM1	Not Significant in Both and Not Common Essential	No	0.417714	0.754414	0.172818	0.0281055	0.772368	1.7327	0.00359049	0.000197408	0.0512446	1.14799	0.000183759	0.000184565	0.000214316	0.417714	0.178965	0.0933731	0.568499	0.169483	0.000209542	0.000182687	0.00018746	0.000176006	0.000145966	0.000134751	0.000168232	0.00017354	0.361114	-1.68244	-2.15343	-1.17818	0.182328	-2.97334	-2.18264	-3.55677	-2.9315	-2.70851	-3.48182	-2.9836	-3.08852	-2.84069	-3.52882	-2.98973	-1.64792	-3.06915	0.0329527	0.830981
CGCACCTGGACTCTAGACTC	OTX1	Not Significant in Both and Not Common Essential	No	0.610288	0.948992	1.09451	0.372398	0.746375	0.848806	0.229791	0.000197408	0.000244022	1.34253	0.481448	0.000184565	0.00214316	0.610288	0.469784	0.264557	0.134556	0.216562	0.000209542	0.000182687	0.00018746	0.000176006	0.000145966	0.000134751	0.000168232	0.00017354	-0.0484541	-0.677887	-3.27564	-3.48553	0.150661	-0.35667	-3.30486	-2.5419	-3.35063	-3.16081	-2.85599	-3.09005	-3.50765	-3.29299	-2.90299	-3.09618	-1.69254	-3.15716	0.0179141	0.09951
TGTAGGATGGAATAGCAACC	LPGAT1	Not Significant in Both and Not Common Essential	No	0.480018	0.764655	0.396464	0.316187	0.553283	0.0877319	1.51878	0.00197408	0.000244022	0.622095	0.654181	0.000184565	0.00214316	0.480018	0.258861	0.317469	0.067278	0.0376629	0.000209542	0.000182687	0.00018746	0.000176006	0.000145966	0.000134751	0.000168232	0.00017354	-0.940308	0.583291	-2.20458	-3.35552	-0.0896088	0.217494	-3.23379	-2.41189	-3.0918	-3.23999	-2.55496	-2.33039	-3.24881	-3.37217	-2.60196	-2.33651	-1.42936	-2.84708	0.0473096	0.513819
TCCATGGCTGCATTGTACGT	ZHX3	Not Significant in Both and Not Common Essential	No	0.264788	1.02068	0.420184	0.16512	0.906047	1.2436	0.000179524	0.000197408	0.117131	1.27198	0.000183759	0.000184565	0.227175	0.264788	0.0159791	0.199196	1.13363	0.285611	0.000209542	0.000182687	0.00018746	0.000176006	0.000145966	0.000134751	0.000168232	0.00017354	0.0857911	-3.36932	-2.92243	-0.888479	0.0955907	-3.35919	-2.95165	-0.60079	-1.88228	-3.03757	-3.78156	-3.21025	-2.0393	-3.16975	-3.82856	-3.21638	-1.73881	-3.02071	0.122443	0.468001
ACCAAGGCCTGTCGGTCACG	CCND3	Not Significant in Both and Not Common Essential	No	0.30302	0.26285	0.243978	0.333753	0.501297	0.00021933	0.0197477	0.961377	0.0244022	0.000213778	0.00367518	1.84012	0.00857263	0.30302	0.162986	0.0466866	0.104281	0.182038	0.000209542	0.000182687	0.00018746	0.000176006	0.000145966	0.000134751	0.000168232	0.00017354	-3.07861	-1.09183	0.459469	-1.31267	-3.08974	-1.82207	0.741421	-1.76698	-2.89088	-2.40748	-2.7453	-3.01463	-3.0479	-2.53966	-2.7923	-3.02076	-1.37013	-2.80736	0.0205341	0.911644
TTATCGTACCTGTATGAACT	ZBTB24	Not Significant in Both and Not Common Essential	No	0.318596	0.105823	0.243978	0.41807	0.152246	0.00438659	0.0574478	1.61875	0.000244022	0.000213778	0.126794	1.04279	0.000214316	0.318596	0.115049	0.292569	0.1211	0.178899	0.000209542	0.000182687	0.00018746	0.000176006	0.000145966	0.000134751	0.000168232	0.00017354	-1.38245	-0.628077	0.587931	-2.79512	-2.69462	-0.284252	0.396948	-2.85149	-2.73961	-3.20452	-2.81024	-3.00708	-2.89663	-3.3367	-2.85724	-3.01321	-1.20639	-2.98315	0.00859786	0.645462
GAAGAAGGTGTTTCACATGC	PVALB	Not Significant in Both and Not Common Essential	No	0.143014	0.139959	0.1186	0.632375	0.0334198	0.00021933	0.000179524	1.54965	0.00244022	0.000213778	0.000183759	1.27166	0.000214316	0.143014	0.131028	0.0684736	0.0302751	0.103573	0.000209542	0.000182687	0.00018746	0.000176006	0.000145966	0.000134751	0.000168232	0.00017354	-2.8049	-2.81996	0.389259	-1.13657	-2.81604	-2.80984	0.303396	-2.19295	-2.79609	-2.57382	-2.20818	-2.76972	-2.95311	-2.70599	-2.25518	-2.77585	-1.73595	-2.62974	0.0100739	0.597408
GGACGACGTGCAGGGCTACG	AP2A2	Not Significant in Both and Not Common Essential	No	0.256293	0.276505	0.250755	0.193226	0.363904	0.00021933	1.87064	0.0276371	0.234261	0.00213778	2.98608	0.00369131	0.0557221	0.256293	0.150203	0.143172	0.178287	0.10985	0.000209542	0.000182687	0.00018746	0.000176006	0.000145966	0.00134751	0.000168232	0.00017354	-3.1006	0.872741	-0.844573	-0.191287	-2.11174	1.07585	-1.71889	-0.814959	-2.85541	-2.89415	-2.97821	-2.79527	-3.01243	-2.02633	-3.02521	-2.8014	-0.854182	-2.79855	0.00248743	0.37921
GCAGAGTAGAGGCCATACTG	SLC26A11	Significant in Both and Not Common Essential	No	0.760382	0.51546	0.694659	1.05044	0.575563	0.0021933	0.651673	0.609991	0.000244022	0.00427557	0.431833	1.04464	0.000214316	0.760382	0.290819	0.423291	0.561771	0.222839	0.000209542	0.000182687	0.00018746	0.000176006	0.000145966	0.000134751	0.000168232	0.00017354	-2.3711	-0.0277419	-0.236048	-3.37266	-2.0812	-0.206456	-0.0024046	-3.42904	-3.14235	-3.36493	-3.47665	-3.10246	-3.29937	-3.49711	-3.52365	-3.10859	-1.46583	-3.31439	0.00946529	0.0494877
GGGCAGCCGACGGACCACGG	MAP3K5	Not Significant in Both and Not Common Essential	No	0.205317	0.512046	0.0440516	0.646427	0.148532	0.00021933	0.000179524	1.11536	0.000244022	0.000213778	0.000183759	1.61495	0.00428632	0.205317	0.0447414	0.354818	0.252292	0.000313858	0.000209542	0.000182687	0.00018746	0.000176006	0.000145966	0.000134751	0.000168232	0.00017354	-3.36821	-2.38984	0.236896	-2.78439	-3.37935	-2.37971	0.39764	-1.53974	-2.32944	-3.2883	-3.12899	-0.251206	-2.48646	-3.42047	-3.17599	-0.257334	-1.90084	-2.29227	0.0598672	0.906753
GTTGACCTGGTGGTCTACAA	SBK1	Not Significant in Both and Not Common Essential	No	0.358243	1.20501	0.962357	0.312674	0.122539	2.66705	1.74857	0.613939	0.00732066	1.33825	1.93865	0.756718	0.000214316	0.358243	0.115049	0.199196	0.168195	0.163206	0.000209542	0.000182687	0.0018746	0.000176006	0.000145966	0.000134751	0.000168232	0.0017354	0.345041	0.259347	0.293033	-1.22372	0.0455466	0.304163	0.383842	-2.75722	-2.73961	-3.03757	-1.9529	-2.96721	-2.89663	-3.16975	-2.9999	-1.97334	-0.293746	-2.71711	0.00857266	0.200206
ATCAACAATGCCGAAAAGAG	RPS15A	DepMap Common Essential	Yes	0.487098	0.491564	0.508287	0.288082	0.096546	0.934344	0.00179524	0.315853	0.00244022	1.16723	0.000183759	0.243626	0.00214316	0.487098	0.33556	0.261445	0.114373	0.169483	0.000209542	0.000182687	0.00018746	0.000176006	0.000145966	0.000134751	0.000168232	0.00017354	0.278927	-2.45199	0.0399689	-1.59731	0.375576	-3.44186	-0.0727925	-1.65368	-3.2045	-3.15567	-2.78541	-2.9836	-3.36152	-3.28785	-2.83241	-2.98973	-1.06539	-3.07509	0.0139701	0.827487
GATGATCATTGCAATGATGA	TMBIM1	Not Significant in Both and Not Common Essential	No	0.594712	0.440359	0.288029	0.316187	0.133679	0.750107	0.217224	0.357309	0.131772	0.354872	0.0349142	0.817625	0.000214316	0.594712	0.431435	0.180521	0.390212	0.759536	0.000209542	0.000182687	0.00018746	0.000176006	0.000145966	0.000134751	0.000168232	0.00017354	0.231316	-0.122528	0.0530999	-0.00624005	-0.0937351	-0.916434	0.41261	-2.79501	-3.31364	-2.99482	-3.31839	-3.63502	-3.47066	-3.127	-3.36539	-3.64115	-0.404615	-3.35826	0.00852004	0.874511
AGAAATACATGGACAGCAGG	HM13	Not Significant in Both and Not Common Essential	No	0.31718	0.218473	0.0881031	0.224844	0.850348	0.00021933	0.000179524	0.025663	1.37872	0.000213778	0.00183759	0.0166109	1.22589	0.31718	0.0287623	0.0435741	0.407032	0.0502173	0.000209542	0.000182687	0.00018746	0.000176006	0.000145966	0.000134751	0.000168232	0.00017354	-2.9983	-2.69087	-0.942574	0.209879	-3.00943	-1.68074	-1.13149	0.158855	-2.13755	-2.37752	-3.33672	-2.45533	-2.29457	-2.5097	-3.38372	-2.46145	-1.51058	-2.61957	0.102059	0.973175
CCCATAAATACGGTCCTCAG	ADAM10	Not Significant in Both and Not Common Essential	No	0.260541	0.580319	0.179595	0.0843166	0.0928327	0.00438659	0.657059	0.724488	0.000244022	0.000213778	0.771787	0.485407	0.000214316	0.260541	0.242882	0.118273	0.0538224	0.15379	0.000209542	0.000182687	0.00018746	0.000176006	0.000145966	0.000134751	0.000168232	0.00017354	-2.12154	0.56331	0.934118	-2.58027	-3.4337	0.633203	0.760193	-2.63665	-3.06412	-2.81118	-2.45805	-2.9414	-3.22114	-2.94335	-2.50505	-2.94753	-0.985167	-2.86148	0.012765	0.57381
TGGAGAATTTAGGCACTCAT	CYP39A1	Not Significant in Both and Not Common Essential	No	0.345499	0.4506	0.223646	0.354832	0.0259932	0.403567	2.59053	0.394816	0.000244022	0.0406179	2.13895	0.164263	0.000214316	0.345499	0.425043	0.0342368	0.0605502	0.225978	0.000209542	0.00182687	0.00018746	0.000176006	0.000145966	0.000134751	0.000168232	0.00017354	-0.0478755	1.06383	0.046372	-2.02743	-1.04507	0.980639	-0.334483	-2.08381	-3.30716	-1.27279	-2.50921	-3.10854	-3.46418	-2.40496	-2.55621	-3.11467	-0.430979	-2.71721	0.0468831	0.278408
GAGCTGTGTTATCAGCATAG	PCDHB13	Not Significant in Both and Not Common Essential	No	0.2747	1.24598	0.820037	0.144041	0.423317	0.0723788	0.493692	0.000197408	0.505126	0.079098	0.806701	0.00184565	0.567937	0.2747	1.00348	0.220983	0.238837	0.225978	0.000209542	0.000182687	0.00018746	0.000176006	0.000145966	0.000134751	0.000168232	0.00017354	-1.2359	-0.220377	-2.86312	0.076734	-1.19735	-0.00712085	-1.89234	0.127634	-3.68024	-3.08265	-3.10519	-3.10854	-3.83726	-3.21483	-3.15219	-3.11467	-0.901479	-3.28695	0.0621861	0.288045
GGGACATCTGTGAGCCACGT	ERP27	Not Significant in Both and Not Common Essential	No	0.220893	0.535941	0.128766	0.0808034	0.0854061	0.140371	1.48108	0.000197408	0.000244022	0.000213778	0.885717	0.00184565	0.000214316	0.220893	0.0639162	0.0684736	0.450763	0.53042	0.000209542	0.000182687	0.00018746	0.000176006	0.000145966	0.000134751	0.000168232	0.00017354	-0.58184	1.06078	-2.61206	-2.54406	-3.39915	0.837494	-1.64128	-2.60043	-2.48434	-2.57382	-3.38104	-3.47909	-2.64136	-2.70599	-3.42804	-3.48522	-1.43507	-3.02236	0.0505269	0.643588
AGGGGCCCGCCGTGGAATTG	HEXB	Not Significant in Both and Not Common Essential	No	0.395059	0.692969	0.0982689	0.112422	0.237652	0.517618	0.642697	0.000197408	0.000244022	0.0855114	1.26058	0.000184565	0.000214316	0.395059	0.354735	0.105823	0.201834	0.210285	0.000209542	0.000182687	0.00018746	0.000176006	0.000145966	0.000134751	0.000168232	0.00017354	-0.126704	0.81559	-2.75549	-2.98851	-0.90869	1.10815	-2.7847	-3.04489	-3.22863	-2.76287	-3.03209	-3.07728	-3.38565	-2.89505	-3.07909	-3.08341	-1.33565	-3.06801	0.00889535	0.975725
GGACGAACAATAGCTGATGT	ATF2	Not Significant in Both and Not Common Essential	No	0.436122	0.215059	0.14232	0.101883	0.397324	0.00021933	0.000179524	1.13707	0.000244022	0.000213778	0.000183759	1.35286	0.000214316	0.436122	0.0926785	0.314356	0.238837	0.72815	0.000209542	0.000182687	0.00018746	0.000176006	0.000145966	0.000134751	0.000168232	0.00017354	-2.99146	-2.89914	1.04769	-3.21172	-3.00259	-2.88902	1.12315	-3.26809	-2.64571	-3.23571	-3.10519	-3.61669	-2.80273	-3.36789	-3.15219	-3.62282	-2.0114	-3.19362	0.0278431	0.812143
TAGTCTAGAGTGCTGTCCAG	PRDM7	Not Significant in Both and Not Common Essential	No	0.339835	0.535941	0.0677716	0.137015	0.0408464	1.5704	0.000179524	0.00197408	0.122011	0.793118	0.000183759	0.000184565	0.000214316	0.339835	0.185357	0.161847	0.218653	0.225978	0.000209542	0.000182687	0.00018746	0.000176006	0.000145966	0.000134751	0.000168232	0.00017354	0.466893	-2.57693	-1.8414	0.475245	0.170221	-2.5668	-2.87062	-2.2801	-2.94674	-2.9474	-3.06685	-3.10854	-3.10376	-3.07957	-3.11385	-3.11467	-1.37794	-3.06017	0.00179642	0.708029
CAGCATATGGTATATTGTGG	MDM4	Not Significant in Both and Not Common Essential	No	0.249213	0.498391	0.0271087	0.091343	0.115113	1.93668	0.00359049	0.000197408	0.000244022	0.517344	0.000183759	0.000184565	0.000214316	0.249213	0.0926785	0.183634	0.531496	0.02197	0.000209542	0.000182687	0.00018746	0.000176006	0.000145966	0.000134751	0.000168232	0.00017354	0.589488	-0.877955	-2.66531	-2.6737	0.0162092	-2.16886	-2.69453	-2.73007	-2.64571	-3.00225	-3.45259	-2.0963	-2.80273	-3.13442	-3.49959	-2.10243	-1.65059	-2.842	0.0702213	0.674433
ACTCCGTACTGGAAAACTCG	ALG1	DepMap Common Essential	Yes	0.763214	0.351605	0.199926	0.270516	0.519863	0.00021933	0.272877	0.548794	0.258663	0.000213778	0.000183759	0.0756718	1.29447	0.763214	0.795757	0.217871	0.185014	0.467648	0.000209542	0.000182687	0.00018746	0.000176006	0.000145966	0.000134751	0.000168232	0.00017354	-3.20496	0.135098	0.307216	-0.303155	-3.21609	-3.03662	-0.553259	0.396203	-3.57951	-3.07649	-2.9943	-3.42439	-3.73653	-3.20867	-3.0413	-3.43052	-1.18445	-3.31146	0.019954	0.550943
TTTCGTTCCTCATTCGACAG	YWHAG	Not Significant in Both and Not Common Essential	No	0.205317	0.279918	0.166041	0.133501	0.0891194	0.767654	0.224405	0.142134	0.287946	0.079098	0.126794	0.0406044	0.750105	0.205317	0.178965	0.0684736	0.0437307	0.0502173	0.000209542	0.000182687	0.00018746	0.000176006	0.000145966	0.000134751	0.000168232	0.00017354	0.438135	0.130817	0.0272135	0.509339	-0.548865	-0.117117	-0.516911	0.92515	-2.9315	-2.57382	-2.36788	-2.45533	-3.08852	-2.70599	-2.41488	-2.46145	0.10597	-2.62492	0.0334461	0.271612
ACCAGGAACATGTACACCTG	NCF1	Not Significant in Both and Not Common Essential	No	0.444618	0.331123	0.518453	0.151067	0.790935	0.00438659	0.604997	2.49919	0.744267	0.000213778	0.321578	2.83492	0.666522	0.444618	0.178965	0.0809234	0.0168195	0.02197	0.000209542	0.000182687	0.0018746	0.000176006	0.00145966	0.000134751	0.000168232	0.00017354	-1.87786	0.0670438	1.21863	-0.026412	-3.19003	-0.207423	1.27337	-0.0743263	-2.9315	-2.64637	-0.952904	-2.0963	-2.08852	-2.77854	-1.9999	-2.10243	-0.352126	-2.19956	0.136066	0.237418
CACATTTGAGGGTTTCCCCG	KCNN1	Not Significant in Both and Not Common Essential	No	0.270452	0.0580319	0.0203315	0.372398	0.0779795	0.0021933	0.00359049	1.69968	0.00976088	0.000213778	0.000183759	0.699503	0.000214316	0.270452	0.543288	0.0342368	0.0201834	0.160067	0.000209542	0.000182687	0.00018746	0.000176006	0.000145966	0.000134751	0.000168232	0.00017354	-1.42257	-0.753016	0.65936	-0.902491	-2.4337	-2.04392	0.273782	-2.56093	-3.41376	-2.27279	-2.03209	-2.95877	-3.57078	-2.40496	-2.07909	-2.9649	-1.14794	-2.71214	0.0988794	0.549959
TCGGAAACATGGTATCACTC	CNOT6	Not Significant in Both and Not Common Essential	No	0.307268	0.378914	0.254144	0.126475	0.467877	0.0021933	0.00179524	0.996911	1.46413	0.000213778	0.00183759	0.922827	1.32233	0.307268	0.226903	0.0840358	0.1211	0.0941573	0.000209542	0.000182687	0.00018746	0.000176006	0.00145966	0.000134751	0.000168232	0.00017354	-2.23744	-2.15096	0.896652	0.495448	-3.24858	-2.14083	0.863116	0.451208	-3.03457	-2.66276	-2.81024	-2.72833	-2.19159	-2.79493	-2.85724	-2.73445	-0.883923	-2.72676	0.0184776	0.268859
AGTGGGGGTTCGTATCACCC	SH3D21	Not Significant in Both and Not Common Essential	No	0.596128	1.32108	0.487956	0.238897	0.386184	0.366281	0.368025	0.548794	0.00244022	0.987656	0.0716659	0.0664436	0.000214316	0.596128	0.565659	0.494878	0.272476	0.169483	0.000209542	0.000182687	0.00018746	0.000176006	0.000145966	0.000134751	0.000168232	0.00017354	-0.557115	-0.122503	0.361199	-2.19937	-0.126323	-0.833068	-0.555758	-3.25574	-3.43128	-3.43279	-3.16242	-2.9836	-3.5883	-3.56497	-3.20942	-2.98973	-0.911084	-3.29531	0.00763646	0.214513
CCATATAATGGAGTACCACG	CEP170	Not Significant in Both and Not Common Essential	No	0.283196	0.788551	0.0338858	0.0597243	0.103973	1.32036	0.000179524	0.000197408	0.000244022	1.08813	0.000183759	0.000184565	0.000214316	0.283196	0.367518	0.0404617	0.117736	0.0721873	0.000209542	0.000182687	0.00018746	0.000176006	0.000145966	0.000134751	0.000168232	0.00017354	0.223863	-2.2759	-2.48079	-2.62949	0.139851	-2.26577	-2.51	-2.68587	-3.24401	-2.34534	-2.798	-2.61293	-3.40103	-2.47751	-2.845	-2.61906	-1.81051	-2.79286	0.0502668	0.849121
AGGCGGGCCTTACGAATCGG	STK25	Not Significant in Both and Not Common Essential	No	0.406387	0.474496	0.464236	0.108909	0.233938	0.824679	0.736049	0.00789632	0.00732066	0.630646	0.202135	0.000184565	0.000214316	0.406387	0.325973	0.771884	0.033639	0.360937	0.000209542	0.000182687	0.00018746	0.000176006	0.000145966	0.000134751	0.000168232	0.00017354	0.240052	0.200168	-1.13964	-1.50455	0.123553	-0.361097	-2.77091	-3.03805	-3.19191	-3.62584	-2.25393	-3.3119	-3.34893	-3.75802	-2.30093	-3.31803	-1.03131	-3.13869	0.0322054	0.80997
TCAGTGTCGGCTTCCAGCTG	SHD	Not Significant in Both and Not Common Essential	No	0.444618	0.430119	0.355801	0.57265	0.638689	0.247843	0.000179524	0.307957	0.517327	0.686229	0.000183759	0.610912	0.0364337	0.444618	0.607204	0.220983	0.151375	0.536697	0.000209542	0.000182687	0.00018746	0.000176006	0.000145966	0.000134751	0.000168232	0.00017354	-0.239412	-3.29708	-0.269399	-0.0915243	0.20288	-3.28696	0.0280894	-1.24379	-3.46206	-3.08265	-2.90715	-3.4842	-3.61908	-3.21483	-2.95415	-3.49033	-1.02465	-3.27681	0.0114924	0.122602
CCTGTAGATGACCCACAGAG	UBE2R2	Not Significant in Both and Not Common Essential	No	0.212397	0.0512046	0.50151	0.326727	0.252505	0.00438659	0.911983	0.552743	0.000244022	0.000213778	0.490636	0.442957	0.000214316	0.212397	0.0575246	0.476203	0.322934	0.00941573	0.000209542	0.000182687	0.00018746	0.000176006	0.000145966	0.000134751	0.000168232	0.00017354	-1.06718	0.259707	0.228338	-3.01484	-2.37935	-0.00952019	0.132177	-3.07122	-2.43858	-3.41608	-3.23621	-1.72833	-2.5956	-3.54826	-3.28321	-1.73445	-1.11524	-2.74759	0.0657494	0.830326
ACTTGCCAATTCATCATGGG	AP2B1	Not Significant in Both and Not Common Essential	No	0.446034	0.535941	0.223646	0.681559	0.56071	0.342154	0.000179524	0.625784	0.43924	0.192401	0.00183759	0.444803	0.345048	0.446034	0.233294	0.441966	0.322934	0.386045	0.000209542	0.000182687	0.00018746	0.000176006	0.000145966	0.000134751	0.000168232	0.00017354	-0.194895	-3.09544	-0.037079	-0.106036	-0.44491	-2.08531	-0.185336	-0.210859	-3.04663	-3.38368	-3.23621	-3.34111	-3.20365	-3.51586	-3.28321	-3.34724	-0.794983	-3.2947	0.000794928	0.11046
AGGACGTAAACAGATTGAGT	PRSS42	Not Significant in Both and Not Common Essential	No	0.661263	0.764655	0.440516	0.263489	0.508723	0.267582	0.00179524	0.369153	0.470963	0.0748225	0.00183759	0.706886	0.477924	0.661263	0.463393	0.513552	0.104281	0.112989	0.000209542	0.000182687	0.00018746	0.000176006	0.000145966	0.000134751	0.000168232	0.00017354	-0.456009	-2.38984	0.146444	-0.0334946	-1.00943	-2.37971	0.428587	-0.0271225	-3.34468	-3.44888	-2.7453	-2.80751	-3.5017	-3.58105	-2.7923	-2.81364	-0.715073	-3.12938	0.0295929	0.0945076
CATAATCCCTCAGTTTACCG	TMC5	Not Significant in Both and Not Common Essential	No	0.351163	0.460841	0.189761	0.193226	1.26252	0.256616	0.00359049	0.0394816	3.30406	0.00427557	0.00183759	0.000184565	4.24131	0.351163	0.0735037	0.0342368	0.117736	0.125543	0.000209542	0.000182687	0.0018746	0.000176006	0.000145966	0.000134751	0.00168232	0.00017354	-0.254267	-1.72305	-0.689671	0.41781	-2.03256	-2.01396	-3.01992	0.526262	-2.54504	-2.27279	-1.798	-2.85327	-2.70206	-2.40496	-1.845	-2.85939	-1.09867	-2.41006	0.0643487	0.470146
GCAGAACCGTGAAAAAGGAG	DERA	Not Significant in Both and Not Common Essential	No	0.294524	0.269677	0.081326	0.238897	0.0334198	1.07691	0.000179524	0.000197408	0.00244022	1.2784	0.00183759	0.00184565	0.000214316	0.294524	0.172574	0.0435741	0.0773697	0.360937	0.000209542	0.000182687	0.00018746	0.000176006	0.000145966	0.000134751	0.000168232	0.00017354	0.601336	-2.65611	-3.08285	-1.13657	0.675823	-1.64598	-2.11206	-2.19295	-2.9157	-2.37752	-2.61566	-3.3119	-3.07272	-2.5097	-2.66266	-3.31803	-1.44367	-2.84799	0.0360333	0.59287
GAAAAATGGGAGACATCGAG	EYS	Not Significant in Both and Not Common Essential	No	0.247797	1.22891	0.291418	0.235384	0.56071	1.09445	0.00179524	0.288216	0.10981	0.859389	0.000183759	0.00369131	0.00428632	0.247797	0.111853	0.0529114	0.269112	0.386045	0.000209542	0.000182687	0.00018746	0.000176006	0.000145966	0.000134751	0.000168232	0.00017354	-0.0503242	-2.21039	0.0879411	-0.708096	-0.15533	-3.20027	-1.8046	-2.11665	-2.72738	-2.46184	-3.15702	-3.34111	-2.8844	-2.59402	-3.20402	-3.34724	-1.26972	-2.96463	0.022708	0.395441
TCTGCCAATTTCCAAACAGT	QSOX1	Not Significant in Both and Not Common Essential	No	0.277532	0.0989955	0.481179	1.00126	0.096546	0.00021933	0.00718097	3.45662	0.000244022	0.00213778	0.000183759	1.77183	0.00214316	0.277532	0.0639162	0.105823	0.111009	0.059633	0.000209542	0.000182687	0.0018746	0.000176006	0.000145966	0.000134751	0.000168232	0.00017354	-2.65452	-1.82612	0.538105	-2.59731	-1.66565	-3.41806	0.247875	-1.65368	-2.48434	-2.76287	-1.77245	-2.52996	-2.64136	-2.89505	-2.81945	-2.53609	-1.62867	-2.5552	0.0366259	0.600741
ATGACTGGAATATCCATGGG	C4orf29	Not Significant in Both and Not Common Essential	No	0.46869	0.423291	0.345635	0.0386451	1.21797	3.18686	0.0287239	0.00394816	0.000244022	3.77105	0.0955545	0.00184565	0.000214316	0.46869	0.204532	0.130722	0.386848	0.382907	0.000209542	0.000182687	0.00018746	0.000176006	0.00291933	0.000134751	0.000168232	0.00017354	0.876724	-1.08037	-0.9907	-3.69821	0.949823	-0.558367	-1.32095	-3.75458	-2.98949	-2.85464	-3.31463	-3.33757	-1.84548	-2.98682	-3.36163	-3.34369	-1.19708	-3.00424	0.00758507	0.536368
TATCCATGCACAGAGAACGC	DHRS7	Not Significant in Both and Not Common Essential	No	0.404971	0.116064	0.189761	0.400504	0.0854061	1.31378	0.0269286	0.00394816	0.000244022	1.00048	0.000183759	0.000184565	0.000214316	0.404971	0.0543288	0.112048	0.13792	0.141236	0.000209542	0.000182687	0.00018746	0.000176006	0.000145966	0.000134751	0.000168232	0.00017354	1.05383	-0.847993	-2.00621	-2.54406	0.935511	-3.01396	-3.33646	-2.60043	-2.41376	-2.7877	-2.86672	-2.90442	-2.57078	-2.91987	-2.91372	-2.91055	-1.54497	-2.78594	0.0489474	0.79668
CGGCACGCGGGACTGCTACG	DNAJC25-GNG10	Not Significant in Both and Not Common Essential	No	0.227973	0.443773	0.0203315	0.456715	0.675822	0.247843	0.000179524	0.000197408	0.790632	0.555824	0.000183759	0.00184565	0.741533	0.227973	0.102266	0.192971	0.0269112	0.0784645	0.000209542	0.000182687	0.00018746	0.000176006	0.000145966	0.000134751	0.000168232	0.00017354	-0.252984	-2.05405	-3.36428	0.0681421	0.0977764	-2.04392	-2.3935	0.0402982	-2.68846	-3.02378	-2.15702	-2.64915	-2.84548	-3.15596	-2.20402	-2.65527	-1.23781	-2.67239	0.0276785	0.671914
CAGATTTACGAGTATCGGAA	SCN3B	Not Significant in Both and Not Common Essential	No	0.29594	0.197991	0.149098	1.16989	0.649829	0.00438659	0.00359049	0.521157	2.36945	0.000213778	0.000183759	0.636751	1.43806	0.29594	0.453805	1.30411	0.373393	0.0659101	0.000209542	0.000182687	0.00018746	0.000176006	0.000145966	0.000134751	0.000168232	0.0017354	-1.65452	-1.61832	-0.351176	0.561848	-2.96668	-2.90922	-0.264175	0.344978	-3.3356	-3.85361	-3.29926	-2.57342	-3.49262	-3.98578	-3.34626	-1.57955	-1.10716	-3.18326	0.0780344	0.727533
CATGTCTATGCGAATACCAG	PAM	Not Significant in Both and Not Common Essential	No	0.421962	0.0989955	0.169429	0.396991	0.308205	0.640443	0.116691	0.000197408	0.744267	0.33777	0.0404269	0.000184565	0.437204	0.421962	0.252469	0.124497	0.104281	0.329551	0.000209542	0.000182687	0.00018746	0.000176006	0.000145966	0.000134751	0.000168232	0.00017354	0.810865	-0.16195	-3.30342	0.382889	0.533006	-0.622317	-3.33263	0.151844	-3.08094	-2.83345	-2.7453	-3.2724	-3.23796	-2.96563	-2.7923	-3.27852	-0.692714	-3.02581	0.0150633	0.932937
GCTGCAGACCAACTCGAGAA	TECRL	Not Significant in Both and Not Common Essential	No	0.269036	0.0409637	0.687882	0.569137	0.590416	0.00021933	1.24949	0.181615	0.317229	0.000213778	0.382218	0.112585	0.0642947	0.269036	0.17577	0.164959	0.168195	0.13182	0.000209542	0.000182687	0.00018746	0.000176006	0.000145966	0.000134751	0.000168232	0.00017354	-2.2713	0.259219	-0.496065	-0.269785	-2.28244	-0.255203	-0.703736	-0.962983	-2.92367	-2.95567	-2.9529	-2.87445	-3.08069	-3.08784	-2.9999	-2.88058	-0.872786	-2.96947	0.00139455	0.465315
CATACTCTATTAAATCAGGA	VAV3	Not Significant in Both and Not Common Essential	No	0.586216	0.194577	0.125378	0.446175	0.118826	0.0021933	0.816835	0.609991	0.00244022	0.000213778	0.196622	0.675509	0.000214316	0.586216	0.223707	0.23032	0.19847	0.163206	0.000209542	0.000182687	0.00018746	0.000176006	0.000145966	0.000134751	0.000168232	0.00017354	-1.94799	0.813913	0.135818	-1.68748	-2.95913	0.195411	0.180126	-2.74386	-3.02841	-3.10062	-3.02479	-2.96721	-3.18543	-3.2328	-3.07179	-2.97334	-1.00165	-3.07305	0.0223144	0.968907
GAATATGCTGGACACCCGAG	GSDMA	DepMap Common Essential	Yes	0.353995	0.587146	0.640442	0.611295	0.371331	1.04401	0.224405	0.000197408	0.000244022	0.831598	0.185596	0.000184565	0.000214316	0.353995	0.479372	0.202308	0.181651	0.119266	0.000209542	0.000182687	0.00018746	0.000176006	0.000145966	0.000134751	0.000168232	0.00017354	0.249959	-0.455447	-3.49089	-3.18233	0.151167	-0.537911	-3.5201	-3.23871	-3.3594	-3.04431	-2.98633	-2.83099	-3.51642	-3.17648	-3.03333	-2.83712	-1.75303	-3.09805	0.0151632	0.188081
CTGGCAGACTTTGATTTCTG	WFDC10A	Not Significant in Both and Not Common Essential	No	0.399307	0.324296	0.308361	0.126475	0.479017	2.4214	0.0448811	0.444168	0.366033	1.2164	0.00551276	0.0572153	0.315044	0.399307	0.316385	0.619375	0.0538224	0.0941573	0.000209542	0.000182687	0.00018746	0.000176006	0.000145966	0.000134751	0.000168232	0.0017354	0.873125	-0.836996	0.545543	-0.116831	0.574135	-1.74769	-0.344493	-0.18198	-3.17894	-3.53025	-2.45805	-2.72833	-3.33596	-3.66242	-2.50505	-1.73445	-0.154398	-2.89168	0.0460737	0.375844
GGATGCTCTTGATCGAGAAG	SPEF2	Not Significant in Both and Not Common Essential	No	0.751886	0.747587	1.57908	0.555084	0.219085	0.502265	0.980202	0.161875	0.000244022	1.26984	1.31571	0.228861	0.000214316	0.751886	0.252469	0.974193	0.218653	0.753259	0.000209542	0.000182687	0.00018746	0.000176006	0.00145966	0.000134751	0.000168232	0.00017354	-0.172729	-0.207089	-0.535179	-2.95318	0.230087	-0.079244	-0.384787	-3.00956	-3.08094	-3.72694	-3.06685	-3.63142	-2.23796	-3.85911	-3.11385	-3.63754	-0.88896	-3.29432	0.0172224	0.491581
GGAAGGTTTCTTCACAACTG	GPM6A	Not Significant in Both and Not Common Essential	No	0.225141	0.0307228	0.081326	0.0808034	0.0779795	0.00877319	4.96205	0.0098704	0.00244022	0.00427557	4.04637	0.00738262	0.000214316	0.225141	0.185357	0.0373492	0.0639141	0.150652	0.000209542	0.000182687	0.00018746	0.000176006	0.00145966	0.00134751	0.000168232	0.0017354	-0.544303	1.78543	-0.913095	-1.50455	-0.856467	1.69684	-1.03922	-2.56093	-2.94674	-2.31057	-2.53269	-2.93245	-2.10376	-1.44275	-2.57969	-1.93858	-0.492037	-2.3484	0.0209475	0.207164
GCTGGAAAAACAGATGCCTA	FAM71D	Not Significant in Both and Not Common Essential	No	0.218061	0.419878	0.35919	0.119449	0.133679	4.33834	0.484715	0.000197408	0.000244022	3.93566	0.352817	0.000184565	0.00214316	0.218061	0.147007	0.0840358	0.349846	0.0439401	0.000209542	0.00182687	0.00018746	0.000176006	0.00145966	0.00134751	0.000168232	0.00017354	1.0142	0.130162	-2.78182	-2.73863	0.971894	-0.00777473	-2.81103	-1.79501	-2.84607	-1.66276	-3.27097	-2.39733	-2.00309	-1.79493	-3.31797	-2.40346	-1.00225	-2.46207	0.0360309	0.22
ATACCGTATACCTGAACAGG	ATP5O	Not Significant in Both and Not Common Essential	No	0.952955	0.440359	1.84678	0.358346	0.222799	0.0197397	0.96584	1.02257	0.00732066	0.00213778	1.05294	1.75337	0.00214316	0.952955	0.437826	0.538452	0.501221	0.144375	0.000209542	0.000182687	0.00018746	0.000176006	0.000145966	0.000134751	0.000168232	0.0017354	-1.34847	-0.28151	0.45539	-1.48336	-2.31384	-0.244012	0.689571	-2.01686	-3.32003	-3.46944	-3.42712	-2.91396	-3.47705	-3.60161	-3.47412	-1.92009	-0.817886	-3.20043	0.0165245	0.684183
ACCAATTACAAAAGCCAAGC	GOLT1B	Not Significant in Both and Not Common Essential	No	0.365323	0.276505	0.0711602	0.309161	0.646116	0.440853	0.199272	0.345464	0.00244022	0.562237	0.145169	0.550005	0.000214316	0.365323	0.118245	0.0902607	0.393576	0.0502173	0.000209542	0.000182687	0.00018746	0.000176006	0.000145966	0.000134751	0.000168232	0.00017354	0.202591	0.447209	0.0482181	-2.42288	0.308216	0.309637	0.250182	-3.47926	-2.75151	-2.69379	-3.32212	-2.45533	-2.90853	-2.82597	-3.36912	-2.46145	-0.542011	-2.84848	0.0490841	0.675855
GCCTCCCATTCAATTGCCAC	IFNB1	Not Significant in Both and Not Common Essential	No	0.311516	0.0955819	0.0474401	0.182686	0.141106	0.0021933	0.000179524	1.37791	0.187897	0.000213778	0.00183759	0.669972	0.00214316	0.311516	0.444218	0.771884	0.211926	0.342105	0.000209542	0.000182687	0.00018746	0.000176006	0.000145966	0.000134751	0.000168232	0.00017354	-1.63928	-2.42202	0.877516	0.124374	-2.65041	-1.4119	0.564351	-1.81849	-3.32633	-3.62584	-3.05328	-3.28863	-3.48334	-3.75802	-3.10028	-3.29476	-1.04698	-3.36631	0.0124329	0.51455
TGTTACAATTGTGTTCAAAG	DESI1	Not Significant in Both and Not Common Essential	No	0.529577	0.621282	0.220258	0.653454	0.163386	0.0416726	0.0987383	0.799503	0.368473	0.000213778	0.000183759	0.885914	0.0321474	0.529577	0.201336	0.488653	0.151375	0.401738	0.000209542	0.000182687	0.00018746	0.000176006	0.000145966	0.000134751	0.000168232	0.00017354	-1.17344	-0.348446	0.0876051	0.353191	-3.46333	-3.07868	0.132177	-0.706069	-2.98265	-3.42729	-2.90715	-3.35842	-3.13967	-3.55947	-2.95415	-3.36454	-1.02462	-3.21167	0.00958186	0.358191
GCCGCGCCGAGAAGACCCGT	C9orf172	Not Significant in Both and Not Common Essential	No	0.259125	0.0307228	0.237201	0.404017	0.534716	4.16068	0.00179524	0.0375075	0.00488044	5.57748	0.00183759	0.0442957	0.00428632	0.259125	0.118245	0.0809234	0.9318	0.307581	0.00209542	0.000182687	0.00018746	0.000176006	0.00145966	0.000134751	0.00168232	0.00017354	2.1317	-2.12099	-1.03228	-2.03966	2.25898	-2.11087	-0.960038	-2.09604	-1.75151	-2.64637	-3.69641	-3.24243	-1.90853	-2.77854	-2.74341	-3.24856	-0.74615	-2.75197	0.092621	0.285012
TGACGATAATGTAGGGGTAA	SESN1	Not Significant in Both and Not Common Essential	No	0.427626	0.573491	0.647219	0.850193	0.868914	0.00021933	0.484715	0.104626	0.0390435	0.00213778	1.54909	0.0387587	0.00428632	0.427626	0.223707	0.631825	0.13792	0.379768	0.000209542	0.000182687	0.00018746	0.000176006	0.000145966	0.000134751	0.000168232	0.00017354	-3.41743	-0.125565	-0.909878	-1.34743	-2.42856	0.379025	-1.34115	-2.30689	-3.02841	-3.53889	-2.86672	-3.33399	-3.18543	-3.67106	-2.91372	-3.34012	-1.43723	-3.23479	0.0136662	0.0884327
GCTGTGGCCGGGACCGAGGG	FAM216A	Not Significant in Both and Not Common Essential	No	0.167086	0.184337	0.0847145	0.326727	0.048273	2.72188	0.000179524	0.0197408	0.10737	3.55727	0.000183759	0.00369131	0.304328	0.167086	0.233294	0.099598	0.222017	0.247948	0.000209542	0.000182687	0.00018746	0.00176006	0.000145966	0.00134751	0.000168232	0.00017354	1.16926	-2.67384	-1.21882	0.347179	1.2855	-2.66371	-1.947	0.799638	-3.04663	-2.73654	-3.07348	-2.14883	-3.20365	-1.86872	-3.12048	-3.15496	-0.612724	-2.79416	0.00208441	0.226622
GAGCGTTTGGAGCAGTACTG	TTC31	Not Significant in Both and Not Common Essential	No	0.298772	0.293573	0.670939	0.449689	0.274785	2.45869	1.46671	0.00592224	0.00244022	3.5872	1.3837	0.000184565	0.000214316	0.298772	0.27484	0.25522	0.0874614	0.19773	0.000209542	0.00182687	0.00018746	0.000176006	0.00145966	0.00134751	0.000168232	0.00017354	0.922988	0.339661	-1.88043	-2.05156	1.08704	0.314359	-3.38676	-3.10794	-3.11781	-2.14521	-2.66891	-3.05055	-2.27483	-2.27738	-2.71591	-3.05667	-0.970331	-2.66341	0.00416314	0.184747
GGCTCACAATGTGAAAGCGA	NUB1	Not Significant in Both and Not Common Essential	No	0.304436	0.129718	0.14232	0.0351319	0.0705529	0.0745721	0.141824	0.000197408	1.00537	0.00213778	0.000183759	0.000184565	0.979423	0.304436	0.476176	0.0342368	0.0470946	0.0502173	0.000209542	0.000182687	0.00018746	0.000176006	0.000145966	0.000134751	0.000168232	0.00017354	-0.240424	-0.00151621	-2.25034	1.15381	-1.78304	-2.88902	-2.27955	1.14246	-3.3565	-2.27279	-2.40006	-2.45533	-3.51352	-2.40496	-2.44706	-2.46145	-0.893452	-2.66396	0.110368	0.421054
ATGCCATTGTAACCCAGGTG	RNF115	Not Significant in Both and Not Common Essential	No	0.434706	0.116064	0.423573	1.0118	0.553283	0.780814	0.120281	0.48365	0.766229	1.04538	0.0294014	0.442957	0.627945	0.434706	0.230098	0.961743	0.645869	0.382907	0.000209542	0.000182687	0.00018746	0.000176006	0.00145966	0.000134751	0.000168232	0.00017354	0.82785	-0.546731	-0.320563	0.141411	0.954577	-1.15856	-0.358733	0.0549743	-3.04064	-3.72135	-3.53724	-3.33757	-2.19766	-3.85353	-3.58424	-3.34369	-0.050722	-3.32699	0.0137773	0.880721
GGGAATGACGAAAAGCGCGG	GIPR	Not Significant in Both and Not Common Essential	No	0.202485	0.160441	0.349024	0.073777	0.126252	0.0021933	0.000179524	0.422453	0.763789	0.0320668	0.000183759	0.162418	0.8144	0.202485	0.134224	0.0529114	0.185014	0.0659101	0.000209542	0.000182687	0.00018746	0.000176006	0.000145966	0.000134751	0.000168232	0.00017354	-1.86422	-3.28873	0.757857	0.781735	-0.69926	-3.27861	0.342713	0.809599	-2.80656	-2.46184	-2.9943	-2.57342	-2.96358	-2.59402	-3.0413	-2.57955	-0.804864	-2.75182	0.0134139	0.501274
CATTTAGTAATGCACCAGAG	ZNF786	Not Significant in Both and Not Common Essential	No	0.29594	0.409637	0.196538	0.168633	0.155959	0.127211	0.172343	0.657369	0.000244022	0.0256534	0.00367518	1.21075	0.000214316	0.29594	0.33556	0.326806	0.0908253	0.172622	0.000209542	0.000182687	0.00018746	0.000176006	0.000145966	0.000134751	0.000168232	0.00017354	-0.507875	-0.0570529	0.590867	-2.80558	-1.20325	-1.72817	0.856112	-2.86196	-3.2045	-3.25258	-2.6853	-2.99157	-3.36152	-3.38476	-2.7323	-2.9977	-0.964614	-3.07628	0.00715882	0.860616
CCTCGTTACCCCATACTCAG	AMOTL1	Not Significant in Both and Not Common Essential	No	0.471522	0.116064	0.254144	0.0983694	0.0705529	0.00657989	0.00359049	4.36074	0.000244022	0.000213778	0.00551276	5.14384	0.000214316	0.471522	0.0255665	0.202308	0.117736	0.0910188	0.000209542	0.000182687	0.00018746	0.000176006	0.00145966	0.000134751	0.000168232	0.00347079	-1.24648	-1.84993	1.6467	-2.46109	-2.73473	-1.66371	1.71843	-2.51746	-2.0864	-3.04431	-2.798	-2.7136	-1.24342	-3.17648	-2.845	-1.4187	-1.13853	-2.41574	0.0807443	0.247505
AGTACTGACTGCAAATATCC	SPC25	DepMap Common Essential	Yes	0.443202	0.119477	0.0508287	0.33024	0.178239	0.00438659	0.745026	0.00197408	0.602735	0.000213778	0.288501	0.000184565	0.546505	0.443202	0.147007	0.186746	0.0470946	0.166345	0.000209542	0.000182687	0.00018746	0.000176006	0.000145966	0.000134751	0.000168232	0.00017354	-1.43516	1.16606	-2.22346	0.529124	-2.74732	0.754038	-3.25268	0.486591	-2.84607	-3.00954	-2.40006	-2.97548	-3.00309	-3.14172	-2.44706	-2.98161	-0.840351	-2.85058	0.0396621	0.717708
GATGTATCTACTCATCAACA	UNC5B	Not Significant in Both and Not Common Essential	No	0.363907	0.085341	0.271087	0.512926	0.267358	1.4739	0.0861716	0.000197408	0.00244022	0.406179	0.211323	0.000184565	0.000214316	0.363907	0.169378	0.252107	0.450763	0.451955	0.000209542	0.000182687	0.00018746	0.000176006	0.000145966	0.000134751	0.000168232	0.00017354	1.23731	-0.497745	-3.41469	-2.03966	0.67756	-0.108162	-3.44391	-3.09604	-2.90759	-3.13988	-3.38104	-3.40957	-3.06461	-3.27205	-3.42804	-3.4157	-1.33567	-3.25231	0.00376188	0.889191
ACTCTTGGAGGTAGTAAGAT	PRAC1	Not Significant in Both and Not Common Essential	No	0.763214	1.48152	1.49436	0.702638	1.1437	3.00262	1.60495	0.153978	0.607615	1.82139	1.18708	0.0572153	0.512215	0.763214	0.313189	0.273894	0.269112	0.994929	0.000209542	0.000182687	0.00018746	0.000176006	0.000145966	0.00134751	0.00168232	0.0017354	0.306793	0.0310063	-0.659273	-0.274684	0.0896954	-0.0999752	-1.08922	-0.34886	-3.17454	-3.17587	-3.15702	-3.75226	-3.33155	-2.30805	-2.20402	-2.75839	-0.255565	-2.98272	0.0254123	0.997424
GCTATACCTACTAGACATGG	CNGA4	Not Significant in Both and Not Common Essential	No	0.3101	0.0512046	0.562505	0.0281055	0.111399	0.00438659	0.727073	0.000197408	0.000244022	0.000213778	1.43883	0.00184565	0.000214316	0.3101	0.143812	0.146285	0.0504585	0.147513	0.000209542	0.000182687	0.00018746	0.000176006	0.000145966	0.000134751	0.000168232	0.00017354	-1.06718	0.111452	-2.15343	-2.65945	-2.37935	0.407883	-1.18264	-2.71583	-2.83652	-2.90349	-2.43003	-2.9233	-2.99354	-3.03567	-2.47703	-2.92943	-1.45482	-2.81613	0.0190292	0.788884
TGGGATTAAAAAGACCACTG	BOP1	DepMap Common Essential	Yes	0.280364	1.05481	0.698048	0.017566	0.111399	0.245649	1.10587	0.000197408	0.000244022	0.324943	0.488798	0.00184565	0.000214316	0.280364	0.0990701	0.0871482	0.265748	0.103573	0.000209542	0.000182687	0.00018746	0.000176006	0.000145966	0.000134751	0.000168232	0.00017354	-0.632859	0.199819	-1.94931	-2.65945	-0.511367	-0.154756	-0.978524	-2.71583	-2.67467	-2.67855	-3.15156	-2.76972	-2.83169	-2.81073	-3.19856	-2.77585	-1.17528	-2.86142	0.018288	0.516151
CCTATTCACCAAGCTAAAGG	EPAS1	Not Significant in Both and Not Common Essential	No	0.232221	0.085341	0.0304972	0.144041	0.0594129	0.00021933	0.000179524	3.07364	0.348952	0.000213778	0.000183759	3.10624	0.150021	0.232221	0.000319581	0.11516	0.131192	0.059633	0.000209542	0.000182687	0.00018746	0.000176006	0.00145966	0.000134751	0.000168232	0.0017354	-2.59006	-2.23014	1.32917	0.768885	-2.60119	-2.22001	1.33375	0.402271	-0.18331	-2.79959	-2.845	-2.52996	0.659671	-2.93177	-2.892	-1.53609	-0.725916	-1.88226	0.0503641	0.186372
GCTACGACTGCTAGACAAGA	CYB5R1	Not Significant in Both and Not Common Essential	No	0.293108	0.440359	0.233812	1.02234	0.415891	0.00021933	0.000179524	1.20024	0.197658	0.000213778	0.000183759	0.568461	0.180025	0.293108	0.169378	0.214758	0.292659	0.222839	0.000209542	0.000182687	0.00018746	0.000176006	0.000145966	0.000134751	0.000168232	0.00017354	-3.30271	-3.11474	0.0696727	-0.323065	-3.31384	-3.10462	-0.254895	-0.363647	-2.90759	-3.07024	-3.19345	-3.10246	-3.06461	-3.20242	-3.24045	-3.10859	-1.71348	-3.11123	0.000575226	0.323973
AGCCCAGTTCCGAGTACATA	ATP5F1	Not Significant in Both and Not Common Essential	No	0.376651	0.191164	0.511676	0.590216	0.211659	0.649216	0.0736049	3.65205	0.00244022	0.463899	0.00183759	1.75153	0.000214316	0.376651	1.03864	0.448191	0.144648	0.103573	0.000209542	0.00182687	0.00018746	0.000176006	0.000145966	0.00134751	0.000168232	0.00017354	0.530983	-0.842088	0.791526	-1.93821	0.385017	-2.44475	0.472407	-2.99458	-3.69519	-2.38976	-2.8874	-2.76972	-3.85221	-2.52193	-2.9344	-2.77585	-0.754961	-2.97831	0.0655053	0.362849
GCACTTCAGTGCCATACAGC	CLIC1	Not Significant in Both and Not Common Essential	No	0.328508	0.139959	0.355801	0.207278	0.252505	0.00021933	1.00713	0.0118445	0.234261	0.000213778	0.488798	0.00184565	0.392198	0.328508	0.0543288	0.136947	0.168195	0.106712	0.000209542	0.000182687	0.00018746	0.000176006	0.000145966	0.000134751	0.000168232	0.00017354	-2.8049	0.451878	-1.24304	-0.03257	-2.81604	0.137922	-2.0504	0.191235	-2.41376	-2.87484	-2.9529	-2.78269	-2.57078	-3.00702	-2.9999	-2.78881	-1.02074	-2.79884	0.0266753	0.940009
AGCGACACCAGACGGTTGTG	LRRC58	Not Significant in Both and Not Common Essential	No	0.321428	0.314055	0.281252	0.607782	0.490157	0.614123	0.197477	0.000197408	0.287946	0.275774	0.676232	0.00184565	0.0771537	0.321428	0.233294	0.189859	0.208562	0.100435	0.000209542	0.000182687	0.00018746	0.000176006	0.000145966	0.000134751	0.000168232	0.00017354	0.29125	-0.153579	-3.48838	-0.231024	-0.0564524	0.381	-2.5176	-0.802978	-3.04663	-3.01672	-3.04633	-2.75636	-3.20365	-3.1489	-3.09333	-2.76249	-0.822221	-3.0093	0.00409918	0.244958
ACCAGGGACTCTGTGGACTG	NBL1	Not Significant in Both and Not Common Essential	No	0.392227	0.157027	0.78954	0.126475	0.490157	0.00021933	0.0754002	0.000197408	0.88336	0.000213778	0.101067	0.000184565	1.06944	0.392227	0.13742	0.295682	0.067278	0.379768	0.000209542	0.000182687	0.00018746	0.000176006	0.000145966	0.000134751	0.000168232	0.00017354	-2.85488	-1.02	-2.80664	0.255803	-2.86601	-0.892765	-2.83586	0.338821	-2.81678	-3.20912	-2.55496	-3.33399	-2.9738	-3.34129	-2.60196	-3.34012	-1.58519	-3.0215	0.0175689	0.541189
CGGATGAAGTAGGACTTCTG	WAS	Not Significant in Both and Not Common Essential	No	0.443202	0.146786	0.555727	0.221331	0.861488	0.120631	0.66783	0.000197408	0.161055	0.0106889	1.12093	0.000184565	0.0471495	0.443202	0.220511	0.373492	0.316207	0.251086	0.000209542	0.000182687	0.00018746	0.000176006	0.000145966	0.000134751	0.000168232	0.00017354	-0.0852257	0.0798044	-3.04968	-0.728275	-1.13775	0.304717	-3.07889	-1.26177	-3.02216	-3.31057	-3.22706	-3.1543	-3.17918	-3.44275	-3.27406	-3.16042	-1.11963	-3.22131	0.00136745	0.372651
TAGGCAACAACTGTACAACT	MMS22L	DepMap Common Essential	Yes	0.2747	0.0307228	0.416796	0.0386451	0.159672	0.00877319	1.07894	0.00394816	0.000244022	0.000213778	1.02905	0.00369131	0.000214316	0.2747	0.0798953	0.146285	0.208562	0.0439401	0.000209542	0.000182687	0.00018746	0.000176006	0.000145966	0.000134751	0.000168232	0.00017354	-0.544303	0.413074	-0.9907	-2.8158	-2.1575	0.392513	-1.01991	-2.87217	-2.58125	-2.90349	-3.04633	-2.39733	-2.73827	-3.03567	-3.09333	-2.40346	-1.19935	-2.77489	0.0229654	0.673002
GCCCGACCGTTCCGACACCG	FAM83F	Not Significant in Both and Not Common Essential	No	0.455946	0.194577	0.857311	0.512926	0.248792	0.00021933	0.622949	0.0177667	0.000244022	0.000213778	1.47375	0.000184565	0.00214316	0.455946	0.233294	0.420179	0.222017	0.0784645	0.000209542	0.000182687	0.00018746	0.000176006	0.000145966	0.000134751	0.000168232	0.00017354	-2.94799	-0.138686	-1.46045	-3.00841	-2.95913	0.235285	-3.44391	-2.06478	-3.04663	-3.36173	-3.07348	-2.64915	-3.20365	-3.4939	-3.12048	-2.65527	-1.97351	-3.07554	0.0154528	0.413679
CCTCATAAAGCGAGTCGTCA	MLYCD	Not Significant in Both and Not Common Essential	No	0.471522	0.197991	0.0643831	0.186199	0.137392	0.7852	0.000179524	0.000197408	0.000244022	1.32543	0.00183759	0.000184565	0.000214316	0.471522	1.9846	0.0902607	0.248929	0.200869	0.000209542	0.000182687	0.00018746	0.000176006	0.000145966	0.000134751	0.000168232	0.00017354	0.598335	-2.55465	-2.97461	-2.75053	0.825711	-1.54452	-3.00383	-2.80691	-3.9764	-2.69379	-3.12317	-3.05739	-4.13342	-2.82597	-3.17017	-3.06351	-1.77638	-3.25548	0.163856	0.790933
CATTATGGCAGGCCAACTTG	ABCC2	Not Significant in Both and Not Common Essential	No	0.400723	0.631523	0.952192	1.07152	0.794648	0.00438659	1.64085	0.244786	0.170815	0.00427557	2.6939	0.0516783	0.186455	0.400723	0.191749	0.286344	0.370029	0.615161	0.00209542	0.000182687	0.00018746	0.000176006	0.000145966	0.000134751	0.000168232	0.00017354	-2.15826	0.236344	-0.641214	-0.667649	-2.1694	0.451657	-1.31669	-0.629601	-1.96146	-3.19518	-3.29533	-3.54346	-3.11848	-3.32736	-3.34233	-3.54959	-0.861851	-3.16665	0.00620248	0.705206
GGTCCCTCTCCTTACCCCGG	PNKD	Not Significant in Both and Not Common Essential	No	0.168502	0.0751001	0.660773	0.256463	0.0631262	0.0197397	3.43789	0.0177667	0.00244022	0.00213778	3.82402	0.00369131	0.00214316	0.168502	0.37391	0.0248995	0.195106	0.10985	0.00209542	0.000182687	0.00018746	0.000176006	0.000145966	0.000134751	0.00168232	0.00017354	-0.5803	0.71624	-1.15942	-1.41278	-1.54568	0.762468	-1.84184	-1.46916	-2.2515	-2.13448	-3.01736	-2.79527	-3.40852	-2.26666	-2.06436	-2.8014	-0.816308	-2.59244	0.0396034	0.302545
CTGGGTTCGGGATATCAAGA	PLEK	Not Significant in Both and Not Common Essential	No	0.270452	0.604214	0.0881031	0.129988	0.126252	2.46527	0.000179524	0.000197408	0.00488044	3.95063	0.000183759	0.000184565	0.000214316	0.270452	0.0639162	0.133835	0.272476	0.0470787	0.000209542	0.000182687	0.00018746	0.000176006	0.00145966	0.000134751	0.00168232	0.00017354	0.610674	-2.69087	-2.81854	-1.41278	0.815476	-2.68074	-2.84775	-2.77018	-2.48434	-2.86486	-3.16242	-2.4273	-1.64136	-2.99704	-2.20942	-2.43342	-1.72434	-2.52752	0.0322032	0.34281
AGGCGACACTTCTGCCACTG	SH2B1	Not Significant in Both and Not Common Essential	No	0.564976	0.2253	0.386298	0.945049	0.118826	0.0153531	0.100534	0.947559	0.000244022	0.000213778	0.00551276	1.02988	0.000214316	0.564976	0.255665	0.168072	1.15718	0.200869	0.000209542	0.000182687	0.00018746	0.000176006	0.000145966	0.000134751	0.000168232	0.00017354	-1.16657	-0.584609	0.00115193	-2.68748	-3.0228	-1.84555	0.0373323	-2.74386	-3.0864	-2.96379	-3.79049	-3.05739	-3.24342	-3.09596	-3.83749	-3.06351	-1.50155	-3.26731	0.0650388	0.408023
CACAGTCTTGCACAAATAGG	FAM214B	Not Significant in Both and Not Common Essential	No	0.356827	0.201405	0.169429	0.66048	0.315631	0.462786	0.00179524	0.00592224	0.490484	1.09027	0.000183759	0.000184565	0.0471495	0.356827	0.140616	0.438854	0.0706419	0.116127	0.000209542	0.000182687	0.00018746	0.000176006	0.000145966	0.000134751	0.000168232	0.00017354	0.36131	-1.97487	-2.04737	0.191445	0.733464	-2.96474	-3.55371	-0.825703	-2.82676	-3.38061	-2.57615	-2.81941	-2.98378	-3.51279	-2.62315	-2.82553	-1.26002	-2.94352	0.0367803	0.643764
CCTCCTCGGTGCGACCACCG	PRKRIP1	DepMap Common Essential	Yes	0.480018	0.146786	0.498122	0.144041	0.323058	0.0789587	1.45415	0.09673	0.000244022	0.000213778	0.238886	0.210405	0.000214316	0.480018	0.17577	0.105823	0.154739	0.125543	0.000209542	0.000182687	0.00018746	0.000176006	0.000145966	0.000134751	0.000168232	0.00017354	-0.269285	0.465273	-0.172925	-3.12185	-2.83672	-0.319145	0.16457	-3.17823	-2.92367	-2.76287	-2.91669	-2.85327	-3.08069	-2.89505	-2.96369	-2.85939	-1.15854	-2.90692	0.0391917	0.765185
CCACTGAAGGGAACGTCCAG	CYP26C1	Not Significant in Both and Not Common Essential	No	0.260541	0.256023	0.0508287	0.172146	0.141106	1.05936	0.000179524	0.000197408	0.065886	0.951314	0.000183759	0.000184565	0.000214316	0.260541	0.0862869	0.273894	1.56421	0.687349	0.000209542	0.000182687	0.00018746	0.000176006	0.000145966	0.000134751	0.000168232	0.00017354	0.616765	-2.45199	-2.94053	-0.330752	0.570045	-2.44186	-2.96975	-2.81849	-2.61467	-3.17587	-3.92139	-3.59165	-2.77169	-3.30805	-3.96839	-3.59778	-1.59582	-3.36869	0.0973689	0.632328
GCTGCCGTCCTTGTAAGGCG	GREM2	Not Significant in Both and Not Common Essential	No	0.32426	0.11265	0.125378	0.267003	0.401037	0.776427	0.000179524	0.217149	0.0146413	0.838012	0.000183759	0.227015	0.000214316	0.32426	0.322777	0.143172	0.343118	0.112989	0.000209542	0.000182687	0.00018746	0.000176006	0.000145966	0.000134751	0.000168232	0.00017354	0.838369	-2.8441	-0.0897583	-1.4376	0.871519	-2.83397	-0.0704616	-3.27213	-3.18763	-2.89415	-3.26253	-2.80751	-3.34465	-3.02633	-3.30953	-2.81364	-1.10477	-3.08075	0.0074975	0.925168
GCCACTCACGCTGAACTCGC	PTPN18	Not Significant in Both and Not Common Essential	No	0.579136	0.5257	0.518453	0.632375	0.178239	1.21728	0.278263	1.10943	0.000244022	1.19502	0.0459397	1.05202	0.00214316	0.579136	0.482567	0.227208	0.309479	0.288749	0.00209542	0.000182687	0.00018746	0.000176006	0.000145966	0.000134751	0.000168232	0.00017354	0.364653	-0.270254	0.244125	-2.86357	0.356637	-1.05252	0.221049	-1.91995	-2.36229	-3.09472	-3.21772	-3.21499	-3.51931	-3.22689	-3.26472	-3.22112	-0.614979	-3.14022	0.00461242	0.579693
CGGCAGCGACACCCCGCAGC	PRRX1	Not Significant in Both and Not Common Essential	No	0.631528	1.73072	0.684494	0.57265	0.664682	0.967244	0.000179524	4.65488	0.00732066	0.466037	0.00183759	1.33441	0.000214316	0.631528	0.210924	0.177409	0.541588	0.313858	0.00209542	0.000182687	0.0018746	0.000176006	0.000145966	0.000134751	0.000168232	0.00017354	-0.252691	-3.58125	0.910019	-1.95806	-0.569806	-2.57112	0.3674	-3.49156	-2.00285	-2.98727	-2.46076	-3.25121	-3.15987	-3.11944	-3.50776	-3.25733	-1.39338	-2.96831	0.014325	0.907406
CAGTTGCCAAGGCCCAGGCG	TCOF1	DepMap Common Essential	Yes	0.11611	0.03755	0.569282	1.34555	0.0705529	0.258809	0.427268	0.795555	0.000244022	0.119716	0.05329	0.413427	0.000214316	0.11611	0.067112	0.124497	0.393576	0.0408015	0.000209542	0.000182687	0.00018746	0.000176006	0.000145966	0.000134751	0.000168232	0.00017354	0.838369	-0.124627	-0.22823	-2.46109	0.503542	-1.02868	-0.512501	-2.51746	-2.50553	-2.83345	-3.32212	-2.36515	-2.66255	-2.96563	-3.36912	-2.37128	-0.691334	-2.79935	0.0789193	0.553368
AGCATTTGAAAAGCCATGAA	SLC39A8	Not Significant in Both and Not Common Essential	No	0.33134	0.116064	0.0745488	0.0667507	0.0891194	1.49363	0.000179524	0.000197408	0.000244022	0.570788	0.000183759	0.000184565	0.00214316	0.33134	0.0415455	0.130722	0.0067278	0.10985	0.000209542	0.000182687	0.00018746	0.000176006	0.000145966	0.000134751	0.000168232	0.00017354	1.10955	-2.61832	-2.52909	-2.56254	0.691777	-2.60819	-2.55831	-1.61892	-2.29725	-2.85464	-1.55496	-2.79527	-2.45427	-2.98682	-1.60196	-2.8014	-1.58676	-2.41832	0.0933479	0.549168
CAGACACCGTCCCATTGAGT	TRIM49	Not Significant in Both and Not Common Essential	No	0.304436	0.174096	0.189761	0.302135	0.393611	0.0021933	0.000179524	0.00197408	0.819914	0.00213778	0.000183759	0.000184565	1.2366	0.304436	0.233294	0.224095	0.127828	0.386045	0.000209542	0.000182687	0.00018746	0.000176006	0.000145966	0.000134751	0.000168232	0.00017354	-1.89969	-3.02408	-2.18484	0.318701	-1.91083	-3.01396	-3.21405	0.497162	-3.04663	-3.08872	-2.83372	-3.34111	-3.20365	-3.2209	-2.88072	-3.34724	-1.80395	-3.12034	0.00410168	0.935239
TGTACACCTACCGAGCACGA	TTC39A	Not Significant in Both and Not Common Essential	No	0.287444	0.314055	0.14232	0.885324	0.0928327	0.0899252	1.86885	1.03639	0.000244022	0.156058	1.07499	0.359903	0.00214316	0.287444	0.0958743	0.049799	0.0706419	0.0408015	0.000209542	0.000182687	0.0018746	0.000176006	0.000145966	0.000134751	0.000168232	0.00017354	-0.543124	1.11831	0.068421	-2.58027	-0.30372	0.878138	-0.390917	-1.63665	-2.66043	-2.43551	-1.57615	-2.36515	-2.81745	-2.56769	-2.62315	-2.37128	-0.423726	-2.4271	0.0761156	0.430525
ATTACTTACTCAATCACTCG	ALKBH3	Not Significant in Both and Not Common Essential	No	0.467274	0.81586	0.179595	0.140528	0.508723	0.0021933	0.000179524	0.000197408	2.31577	0.000213778	0.000183759	0.00184565	2.06386	0.467274	0.156595	0.0280119	0.0908253	0.081603	0.000209542	0.000182687	0.00018746	0.000176006	0.000145966	0.000134751	0.000168232	0.0017354	-2.57052	-3.00017	-2.8524	0.658214	-3.58165	-2.99005	-1.88161	0.608199	-2.87351	-2.18563	-2.6853	-2.66618	-3.03053	-2.31781	-2.7323	-1.67231	-1.95125	-2.52045	0.103602	0.748566
GAGGCAATGGTATTGCATGT	C2orf49	Not Significant in Both and Not Common Essential	No	0.189741	0.238955	0.464236	0.126475	0.664682	0.0021933	0.628335	0.171745	0.200098	0.00213778	0.529225	0.249163	0.270038	0.189741	0.214119	0.233433	0.131192	0.0910188	0.000209542	0.000182687	0.00018746	0.000176006	0.000145966	0.000134751	0.000168232	0.00017354	-2.03722	0.131452	0.132879	-0.521371	-2.04835	0.0569015	0.294479	-0.391189	-3.00938	-3.10645	-2.845	-2.7136	-3.1664	-3.23863	-2.892	-2.71973	-0.547802	-2.9614	0.00293853	0.545531
TCTGCTATTGACCTCTGAGG	CXorf23	Not Significant in Both and Not Common Essential	No	0.286028	0.395982	0.0643831	0.0632375	0.178239	0.0197397	0.000179524	0.0296112	0.788191	0.0940625	0.000183759	0.00184565	1.11873	0.286028	0.000319581	0.183634	0.127828	0.128682	0.000209542	0.000182687	0.00018746	0.000176006	0.000145966	0.000134751	0.000168232	0.00017354	-1.30233	-2.55465	-0.329519	0.645629	-0.624259	-2.54452	-1.53483	0.797723	-0.18331	-3.00225	-2.83372	-2.86399	-0.340329	-3.13442	-2.88072	-2.87012	-0.930845	-2.26361	0.0350349	0.734162
TCTCTGTATGGCAGCAAATG	RAD51D	DepMap Common Essential	Yes	0.0155758	0.102409	0.108435	0.0667507	0.508723	5.44376	0.000179524	0.000197408	0.000244022	6.22737	0.00367518	0.000184565	0.00214316	0.0155758	0.051133	0.224095	0.00033639	0.0439401	0.000209542	0.00365373	0.0018746	0.000176006	0.00145966	0.000134751	0.000168232	0.00017354	1.72556	-2.78105	-2.52909	-3.31905	1.78397	-1.46989	-2.55831	-2.37543	-2.38743	-1.7877	0.746066	-2.39733	-1.54445	-3.2209	-0.300934	-2.40346	-1.44041	-1.66202	0.177008	0.218091
GTGTCCACCCGAGATACTCT	FAM153A	Not Significant in Both and Not Common Essential	No	0.543737	0.157027	0.457459	0.0808034	0.0445597	0.0021933	0.976612	0.000197408	4.2289	0.00427557	0.20581	0.00369131	4.11058	0.543737	0.0894827	0.121385	0.235473	0.48648	0.000209542	0.00365373	0.00018746	0.00176006	0.000145966	0.000134751	0.000168232	0.00017354	-1.85488	0.32937	-2.61206	1.97729	-1.56498	-0.346886	-1.34025	1.96496	-2.63047	-1.52143	-3.09903	-2.44154	-2.78749	-2.95463	-3.14603	-3.44767	-0.43093	-2.75354	0.0344034	0.202659
CACAGGGGACACTTAAAAGT	RNF138	Not Significant in Both and Not Common Essential	No	0.223725	0.160441	0.820037	0.0702638	0.0519863	0.535164	1.52057	0.000197408	0.000244022	0.0897869	2.23634	0.00553696	0.000214316	0.223725	0.0703078	0.491765	0.0033639	0.0564944	0.000209542	0.000182687	0.00018746	0.00176006	0.000145966	0.000134751	0.000168232	0.00017354	0.523172	0.268173	-2.55137	-2.32846	-0.252102	0.435704	-1.10346	-2.38483	-2.52573	-3.43005	-1.25393	-1.50648	-2.68275	-3.56223	-1.30093	-2.51261	-0.924147	-2.34684	0.129532	0.420177
TCTCCTAATCATATCTCCCA	CTSC	Not Significant in Both and Not Common Essential	No	0.00424794	0.0136546	0.000338858	0.000351319	0.241365	0.00021933	0.000179524	0.000197408	1.09078	0.000213778	0.000183759	0.000184565	0.949419	0.00424794	0.000319581	0.000311244	0.00033639	0.000313858	0.000209542	0.000182687	0.00018746	0.000176006	0.000145966	0.000134751	0.000168232	0.00017354	-1.79418	-0.275895	-0.250337	0.655063	-1.80532	-0.265769	-0.279552	0.594784	-0.18331	-0.231393	-0.253934	-0.251206	-0.340329	-0.363569	-0.300934	-0.257334	-0.42765	-0.272751	0.300427	0.276331
AATCTGGAATATATGTCACA	PIWIL4	Not Significant in Both and Not Common Essential	No	0.266204	0.273091	0.14232	0.0421583	0.315631	3.75273	0.529597	0.00394816	0.0366033	3.54872	0.216835	0.000184565	0.000214316	0.266204	0.466588	0.0715861	0.0740058	0.134959	0.000209542	0.000182687	0.00018746	0.000176006	0.00145966	0.00134751	0.000168232	0.0017354	1.13804	0.57068	-1.02849	-0.935659	1.11376	0.182863	-2.35873	-3.16813	-3.34766	-2.59312	-2.59636	-2.88467	-2.50468	-1.7253	-2.64336	-1.8908	-0.560707	-2.52324	0.0541498	0.209419
AGATTGTACACAAATAGCAG	ANKRD31	Not Significant in Both and Not Common Essential	No	0.382315	0.116064	0.416796	0.245923	0.475304	0.432079	0.486511	0.718565	0.0390435	0.0962003	0.124956	0.0738262	0.0642947	0.382315	0.19814	0.171184	0.191742	0.0376629	0.000209542	0.000182687	0.00018746	0.000176006	0.000145966	0.000134751	0.000168232	0.00017354	0.570866	0.0671691	0.465667	-1.08542	-0.0815211	-0.523166	-0.522589	-0.868796	-2.9757	-2.97176	-3.00981	-2.33039	-3.13272	-3.10393	-3.05681	-2.33651	-0.247224	-2.8647	0.0234471	0.526213
GAAGAATCCCCACAGCAGAC	KRTAP10-4	Not Significant in Both and Not Common Essential	No	0.193989	0.0648591	0.355801	0.0210792	0.0668396	0.00438659	0.534982	0.000197408	0.0341631	0.00213778	1.44067	0.00369131	0.00857263	0.193989	0.121441	0.48554	0.0538224	0.0502173	0.000209542	0.000182687	0.00018746	0.000176006	0.000145966	0.000134751	0.000168232	0.00017354	-1.16984	0.177132	-2.02849	-0.291477	-1.48201	0.607357	-0.756674	-0.89192	-2.76309	-3.42452	-2.45805	-2.45533	-2.92011	-3.55669	-2.50505	-2.46145	-0.72949	-2.81804	0.0881152	0.570582
GTGTCTTTCAGACCCTTACG	OTOS	Not Significant in Both and Not Common Essential	No	0.308684	0.232127	0.152486	0.34078	0.349051	0.190817	0.052062	0.831088	0.0268424	0.0876492	0.115768	0.710577	0.000214316	0.308684	0.313189	0.0933731	0.0840975	0.417431	0.000209542	0.000182687	0.00018746	0.000176006	0.000145966	0.000134751	0.000168232	0.00017354	-0.0851086	-0.466709	0.387173	-1.11407	-0.422978	-0.119641	0.319137	-3.21183	-3.17454	-2.70851	-2.65187	-3.37506	-3.33155	-2.84069	-2.69887	-3.38119	-0.589254	-3.02029	0.0211912	0.843471
TCTTAAGTATATCTGGAAAG	NPM1	DepMap Common Essential	Yes	0.220893	0.139959	0.460847	0.0843166	0.226512	1.34668	0.271082	0.000197408	0.0146413	0.179574	0.200297	0.000184565	0.000214316	0.220893	0.115049	0.112048	0.174923	0.10985	0.000209542	0.000182687	0.00018746	0.000176006	0.000145966	0.000134751	0.000168232	0.00017354	0.983264	-0.230456	-2.63055	-1.18951	0.108243	-0.361882	-2.65976	-3.02404	-2.73961	-2.7877	-2.96994	-2.79527	-2.89663	-2.91987	-3.01694	-2.8014	-1.12559	-2.86592	0.0027428	0.888106
CCACGTCATCCAGCCCTCAC	USP17L17	Not Significant in Both and Not Common Essential	No	0.444618	0.692969	0.579448	0.382938	0.185665	0.519811	0.00179524	0.833062	0.00244022	0.399766	0.000183759	0.2547	0.000214316	0.444618	0.508134	0.326806	0.171559	0.156929	0.000209542	0.000182687	0.00018746	0.000176006	0.000145966	0.000134751	0.000168232	0.00017354	-0.124868	-2.50889	0.337549	-1.8813	-0.238908	-3.49877	-0.1771	-2.93768	-3.38471	-3.25258	-2.9615	-2.95018	-3.54173	-3.38476	-3.0085	-2.9563	-1.37875	-3.18003	0.0103759	0.170841
CAGGATCTGAGGCAATTCTG	C15orf43	Not Significant in Both and Not Common Essential	No	0.335588	0.129718	0.508287	0.674533	0.664682	0.0021933	0.0861716	0.234916	0.656419	0.000213778	0.00918794	0.121813	0.900126	0.335588	0.0223707	0.10271	0.0538224	0.125543	0.000209542	0.000182687	0.00018746	0.000176006	0.000145966	0.000134751	0.000168232	0.00017354	-1.7719	-0.770745	-0.458091	-0.00543277	-2.78304	-1.74289	-0.74331	0.131689	-2.02841	-2.74991	-2.45805	-2.85327	-2.18543	-2.88208	-2.50505	-2.85939	-1.01796	-2.5652	0.0805851	0.21126
GAAATACATTGGGGAACCCA	OR4A5	Not Significant in Both and Not Common Essential	No	0.532409	0.419878	0.396464	0.309161	0.226512	0.350927	0.0987383	0.000197408	0.241582	1.25488	0.000183759	0.000184565	0.0621516	0.532409	0.223707	0.454416	0.666052	0.461371	0.000209542	0.000182687	0.00018746	0.000176006	0.000145966	0.000134751	0.000168232	0.00017354	-0.0779063	-0.603718	-3.19482	0.0279734	0.475479	-3.33396	-3.22404	-0.561639	-3.02841	-3.39575	-3.5506	-3.41852	-3.18543	-3.52792	-3.5976	-3.42465	-1.31158	-3.39111	0.00288261	0.450265
CTCCGCGTAGCTCCCGACCG	KIF26B	Not Significant in Both and Not Common Essential	No	0.277532	0.66566	0.481179	0.193226	0.958034	3.35794	0.315963	0.795555	0.412397	3.75395	0.135981	0.337755	0.602227	0.277532	0.37391	0.336143	0.645869	0.637131	0.00419084	0.000182687	0.00018746	0.000176006	0.00145966	0.000134751	0.000168232	0.00017354	0.70282	-0.18267	0.614605	-0.366065	0.751236	-0.548828	0.242536	-0.201621	-1.95047	-3.26482	-3.53724	-3.5587	-2.40852	-3.39699	-3.58424	-3.56483	0.126502	-3.15822	0.00437034	0.228101
TGGAGCTACAGAAATCGACG	DERA	Not Significant in Both and Not Common Essential	No	0.278948	0.153614	0.352413	0.347806	0.174526	0.0021933	0.265696	2.5821	0.00732066	0.000213778	0.00367518	1.52082	0.00214316	0.278948	0.0543288	0.641162	0.0706419	0.0313858	0.000209542	0.00182687	0.00018746	0.000176006	0.000145966	0.000134751	0.000168232	0.00017354	-1.84533	-0.122667	0.870636	-1.37731	-2.85647	-1.98177	0.640741	-1.91081	-2.41376	-2.54526	-2.57615	-2.25121	-2.57078	-3.67744	-2.62315	-2.25733	-1.07287	-2.61439	0.13588	0.435518
GCCACGCCGACACCACCAAG	SF3B5	DepMap Common Essential	Yes	0.355411	0.751001	0.332081	0.519952	0.226512	1.02208	0.000179524	0.000197408	0.00732066	0.964141	0.00367518	0.000184565	0.000214316	0.355411	0.380302	0.124497	0.104281	0.0847416	0.000209542	0.000182687	0.00018746	0.000176006	0.000145966	0.000134751	0.000168232	0.00017354	0.133844	-3.26712	-3.4206	-1.49054	0.1085	-1.95597	-3.44981	-3.02404	-3.25886	-2.83345	-2.7453	-2.68257	-3.41588	-2.96563	-2.7923	-2.6887	-2.04572	-2.92283	0.0320021	0.33789
CTTGGATACACACTTACCCC	DDC	Not Significant in Both and Not Common Essential	No	0.542321	0.621282	0.958969	1.38771	0.233938	0.00438659	0.00718097	1.96421	0.000244022	0.000213778	0.00183759	1.76814	0.000214316	0.542321	0.565659	0.364155	0.602138	0.182038	0.000209542	0.000182687	0.00018746	0.000176006	0.000145966	0.00134751	0.000168232	0.00017354	-2.15116	-2.12562	0.150889	-2.98167	-3.46333	-2.71756	0.105218	-3.03805	-3.43128	-3.29958	-3.50679	-3.01463	-3.5883	-2.43175	-3.55379	-3.02076	-2.02766	-3.23086	0.00461643	0.456976
AATAGTACTCACAAACTCCG	ANO6	Not Significant in Both and Not Common Essential	No	0.485682	0.18775	0.138932	0.168633	0.349051	0.157917	0.00179524	0.00394816	3.93364	0.0171023	0.000183759	0.00369131	2.34676	0.485682	0.0958743	0.0964856	0.0370029	0.878802	0.000209542	0.000182687	0.00018746	0.00176006	0.000145966	0.000134751	0.00168232	0.00017354	-0.0751511	-1.88868	-1.63055	1.05191	-1.04053	-2.87855	-1.65976	0.82758	-2.66043	-2.72275	-2.29533	-2.69836	-2.81745	-2.85493	-1.34233	-3.70449	-0.911717	-2.63701	0.11969	0.343631
CACAGTGTGACTTACCCGCT	TGM7	Not Significant in Both and Not Common Essential	No	0.270452	0.0443773	0.182983	0.425096	0.111399	0.00021933	1.12203	0.00394816	0.141533	0.000213778	0.711146	0.00738262	0.000214316	0.270452	0.425043	0.0560239	0.148012	0.106712	0.000209542	0.000182687	0.00018746	0.000176006	0.000145966	0.000134751	0.000168232	0.00017354	-2.30606	0.787594	-2.03209	0.103976	-2.3172	0.589548	-1.76028	-2.71583	-3.30716	-2.48667	-2.89739	-2.78269	-3.46418	-2.61884	-2.94439	-2.78881	-1.20629	-2.91127	0.038556	0.807757
CCATGATTAGAGTCCCAGCT	CERS2	Not Significant in Both and Not Common Essential	No	0.307268	0.03755	0.108435	0.179173	0.330484	0.00021933	0.00359049	2.70844	0.0390435	0.000213778	0.00183759	3.33141	0.0171453	0.307268	0.0543288	0.233433	0.423851	0.436262	0.000209542	0.00182687	0.00018746	0.000176006	0.000145966	0.00134751	0.000168232	0.00017354	-2.23351	-1.48002	1.17945	-0.927602	-2.24465	-1.77092	1.26936	-1.28501	-2.41376	-2.10645	-3.3543	-3.39422	-2.57078	-2.23863	-3.4013	-3.40035	-0.936613	-2.85997	0.0143439	0.290117
AGTACTGGAATGACATCCAC	CXorf21	Not Significant in Both and Not Common Essential	No	0.395059	0.314055	0.630276	0.0843166	0.226512	2.79645	0.518825	0.000197408	0.000244022	3.22378	0.334441	0.000184565	0.00214316	0.395059	0.0479372	0.189859	0.201834	0.0408015	0.00209542	0.000182687	0.00018746	0.000176006	0.000145966	0.000134751	0.00168232	0.00017354	0.949601	-0.0845099	-2.63055	-2.96766	1.01136	-0.275211	-2.65976	-2.02404	-1.3594	-3.01672	-3.03209	-2.36515	-2.51642	-3.1489	-2.07909	-2.37128	-1.0851	-2.48613	0.0540758	0.308331
ACAGGGCGGAGTCAATGGAC	PQLC1	Not Significant in Both and Not Common Essential	No	0.57772	0.0989955	0.54895	0.706152	0.126252	0.0021933	0.000179524	1.37199	0.00488044	0.00213778	0.000183759	0.599838	0.000214316	0.57772	0.124637	0.401504	0.430579	0.0627716	0.000209542	0.000182687	0.00018746	0.000176006	0.000145966	0.000134751	0.000168232	0.00017354	-1.65452	-3.48541	0.288453	-1.41278	-1.66565	-3.47528	-0.0708642	-2.77018	-2.77438	-3.34198	-3.36114	-2.55224	-2.9314	-3.47416	-3.40814	-2.55836	-1.78078	-3.05022	0.0305321	0.465056
AACCAGCCCTCAAAATCGGT	DEGS1	Not Significant in Both and Not Common Essential	No	0.434706	0.238955	0.511676	0.25295	0.311918	0.059219	0.000179524	0.00394816	0.641778	0.000213778	0.000183759	0.000184565	1.27518	0.434706	0.220511	0.121385	0.141284	0.112989	0.000209542	0.000182687	0.00018746	0.000176006	0.000145966	0.000134751	0.000168232	0.00017354	-0.605855	-3.45487	-1.80664	0.313344	-3.04835	-3.44475	-3.13689	0.611531	-3.02216	-2.82246	-2.87718	-2.80751	-3.17918	-2.95463	-2.92418	-2.81364	-1.82156	-2.92512	0.026752	0.573179
ACTCTCTATATCCAATGAAG	PHACTR1	Not Significant in Both and Not Common Essential	No	0.637192	0.0716864	0.603168	0.34078	0.642402	0.0021933	1.44517	0.302034	0.10981	0.00427557	2.1904	0.191948	0.00857263	0.637192	0.166182	0.118273	0.272476	0.263641	0.000209542	0.000182687	0.00018746	0.00176006	0.000145966	0.000134751	0.000168232	0.00017354	-1.51434	0.379481	-0.0524183	-0.767165	-1.22444	0.560085	-0.249291	-1.87469	-2.89931	-2.81118	-3.16242	-2.17549	-3.05633	-2.94335	-3.20942	-3.18161	-0.592848	-2.92989	0.033129	0.821118
TTAACCTGGACAAGTACCGG	GPX4	Not Significant in Both and Not Common Essential	No	0.2747	0.174096	0.111823	0.137015	0.50501	0.00021933	0.10951	0.00197408	1.23719	0.000213778	0.00551276	0.000184565	0.621516	0.2747	0.0894827	0.161847	0.104281	0.134959	0.000209542	0.000182687	0.00018746	0.000176006	0.000145966	0.000134751	0.000168232	0.00017354	-2.89969	-0.00907736	-1.8414	0.389136	-2.91083	-1.30716	-2.87062	0.0901523	-2.63047	-2.9474	-2.7453	-2.88467	-2.78749	-3.07957	-2.7923	-2.8908	-1.41994	-2.84475	0.00966428	0.97121
CAGGGGCTCGTTCATAACCA	CEP76	Not Significant in Both and Not Common Essential	No	0.416298	0.167268	0.274475	0.804521	0.167099	0.00021933	0.434449	0.000197408	0.163495	0.00213778	1.3102	0.00184565	0.0600084	0.416298	0.207728	0.112048	0.713147	0.116127	0.000209542	0.000182687	0.00018746	0.000176006	0.000145966	0.000134751	0.000168232	0.00017354	-2.88231	0.199436	-3.61017	-0.00946938	-1.89345	0.678835	-2.63939	-0.444762	-2.99622	-2.7877	-3.58027	-2.81941	-3.15324	-2.91987	-3.62727	-2.82553	-1.32516	-3.08869	0.0519605	0.562691
TAACAACCACAGATATCGGG	TTC33	Not Significant in Both and Not Common Essential	No	0.812773	0.522287	1.60619	0.59373	0.475304	0.0021933	0.461377	0.33362	0.00244022	0.00213778	0.413457	0.751181	0.000214316	0.812773	0.370714	0.295682	0.864522	0.191453	0.000209542	0.000182687	0.00018746	0.000176006	0.000145966	0.000134751	0.000168232	0.00017354	-2.37681	-0.541741	-0.250337	-2.28954	-2.38795	-0.589367	0.102156	-3.34592	-3.24777	-3.20912	-3.66387	-3.03653	-3.40479	-3.34129	-3.71087	-3.04266	-1.45994	-3.33211	0.0216306	0.0544288
TGGCGCCTAGCATGACCCGC	CHST1	Not Significant in Both and Not Common Essential	No	0.33134	0.249196	1.16228	0.140528	1.4222	0.0021933	1.04124	0.00394816	0.000244022	0.000213778	0.916956	0.000184565	0.000214316	0.33134	0.399476	0.227208	0.282568	0.395461	0.000209542	0.000182687	0.00018746	0.000176006	0.000145966	0.000134751	0.000168232	0.00017354	-2.05544	-0.0477599	-1.55137	-3.76553	-3.06658	-0.102962	-2.88161	-3.82191	-3.28022	-3.09472	-3.17821	-3.35158	-3.43724	-3.22689	-3.22521	-3.3577	-2.16165	-3.26897	0.000587708	0.219195
CTATCAACTGTGATTCGTGA	LTN1	Not Significant in Both and Not Common Essential	No	0.630112	0.689555	0.260921	0.0808034	0.386184	1.60988	0.000179524	0.000197408	0.00244022	3.03352	0.00367518	0.000184565	0.000214316	0.630112	0.207728	0.348593	0.174923	0.059633	0.00209542	0.000182687	0.00018746	0.000176006	0.000145966	0.000134751	0.000168232	0.00017354	0.368225	-3.16239	-2.61206	-2.19937	0.643378	-1.85123	-2.64128	-3.25574	-1.99622	-3.28061	-2.96994	-2.52996	-3.15324	-3.41279	-3.01694	-2.53609	-1.83881	-2.86197	0.0442837	0.692233
GAGCAGCTACTGTATACTCC	ICMT	Not Significant in Both and Not Common Essential	No	0.48285	0.177509	0.50151	0.404017	0.349051	0.00021933	0.192091	0.023689	1.05906	0.000213778	0.0679907	0.000184565	0.619373	0.48285	0.469784	0.367268	0.333026	0.725012	0.000209542	0.000182687	0.00018746	0.000176006	0.000145966	0.000134751	0.000168232	0.00017354	-2.90812	-0.416773	-1.23185	0.482032	-2.91926	-0.86783	-3.34025	0.249063	-3.35063	-3.30328	-3.24957	-3.61482	-3.50765	-3.43545	-3.29657	-3.62095	-1.36912	-3.42236	0.00228662	0.381472
ACGAGGTACTTTCTTGAAGT	TMEM167B	Not Significant in Both and Not Common Essential	No	0.734894	0.566664	0.291418	0.421583	0.43817	0.0021933	0.70194	0.00197408	0.449001	0.00213778	0.602729	0.000184565	0.188598	0.734894	0.0383497	0.0902607	0.706419	0.0878802	0.000209542	0.000182687	0.00018746	0.000176006	0.000145966	0.000134751	0.000168232	0.00017354	-2.41223	0.381784	-2.32952	0.0106047	-2.42336	0.315606	-3.35873	-0.366106	-2.26249	-2.69379	-3.57615	-2.69836	-2.41951	-2.82597	-3.62315	-2.70449	-1.27274	-2.85049	0.105804	0.0822977
CAGAAGGTACCTTTGCTCTG	P2RX7	Significant in Both and Not Common Essential	No	0.720734	0.832928	0.711602	0.881811	0.556996	0.603157	0.455992	0.049352	0.000244022	0.361286	0.439183	0.0369131	0.000214316	0.720734	1.00348	0.423291	1.30856	0.389184	0.000209542	0.000182687	0.00018746	0.000176006	0.000145966	0.000134751	0.000168232	0.00017354	-0.140177	-0.19328	-1.25207	-3.35842	-0.362756	-0.209592	-1.37819	-3.4148	-3.68024	-3.36493	-3.84389	-3.34463	-3.83726	-3.49711	-3.89089	-3.35076	-1.28866	-3.60121	0.0117402	0.000591038
ATTCGATAATCACAACTCGG	ACTR10	DepMap Common Essential	Yes	0.523913	0.105823	0.0745488	0.091343	0.222799	0.0021933	0.00179524	0.906103	0.00244022	0.000213778	0.000183759	1.03172	0.000214316	0.523913	0.127832	0.124497	0.27584	0.059633	0.000209542	0.000182687	0.00018746	0.000176006	0.000145966	0.000134751	0.000168232	0.00017354	-1.68348	-1.61832	0.996502	-1.96048	-2.69462	-2.60819	1.05289	-3.01686	-2.78537	-2.83345	-3.16775	-2.52996	-2.94239	-2.96563	-3.21475	-2.53609	-1.44157	-2.87192	0.055979	0.830788
GCGATTACAGCCGACCCCCG	RASAL1	Not Significant in Both and Not Common Essential	No	0.264788	0.273091	0.271087	1.732	0.174526	0.18643	0.00718097	0.874518	0.00244022	0.211641	0.0716659	0.588764	0.000214316	0.264788	0.134224	0.23032	0.901525	0.225978	0.000209542	0.000182687	0.00018746	0.000176006	0.000145966	0.000134751	0.000168232	0.00017354	-0.165792	-1.57693	-0.296779	-1.85443	-0.110708	-0.577796	-0.468607	-2.91081	-2.80656	-3.10062	-3.68207	-3.10854	-2.96358	-3.2328	-3.72907	-3.11467	-0.99523	-3.21724	0.0651884	0.388019
CACCAGGGAAGCTCAACGGG	NDUFAF3	Not Significant in Both and Not Common Essential	No	0.26762	0.0887546	0.152486	0.0948562	0.690675	0.482525	0.000179524	0.000197408	0.11469	0.998345	0.00183759	0.00184565	0.32576	0.26762	0.370714	0.827908	0.507949	0.0502173	0.000209542	0.000182687	0.00018746	0.000176006	0.000145966	0.000134751	0.000168232	0.00017354	0.735329	-2.92911	-2.6817	-0.779748	1.05109	-1.91898	-1.71092	-0.326376	-3.24777	-3.65627	-3.43291	-2.45533	-3.40479	-3.78845	-3.47991	-2.46145	-1.07005	-3.24086	0.035344	0.916111
CAGCAGCAGCTAGTCTACAA	CCDC144A	DepMap Common Essential	Yes	0.210981	0.133132	0.35919	0.382938	0.375044	0.0109665	0.114896	0.671187	0.00976088	0.00213778	0.406107	0.570307	0.139305	0.210981	0.115049	0.124497	0.306115	0.116127	0.000209542	0.000182687	0.00018746	0.000176006	0.000145966	0.000134751	0.000168232	0.00017354	-1.08421	-0.495019	0.243715	-1.58459	-1.79432	0.0533162	0.17298	-0.430116	-2.73961	-2.83345	-3.21298	-2.81941	-2.89663	-2.96563	-3.25998	-2.82553	-0.614781	-2.94415	0.00964258	0.642866
CAGACCAAGTACCTCGATGT	AOC1	Not Significant in Both and Not Common Essential	No	0.278948	0.416464	0.237201	0.16512	0.0891194	0.00438659	3.45584	0.0138186	0.744267	0.00213778	3.34441	0.00553696	0.68581	0.278948	0.0479372	0.121385	0.0941892	0.156929	0.000209542	0.000182687	0.0018746	0.000176006	0.00145966	0.000134751	0.000168232	0.0017354	-1.97745	1.16344	-1.07734	0.921757	-2.28961	1.1492	-1.47453	0.886232	-2.3594	-2.82246	-1.70109	-2.95018	-1.51642	-2.95463	-2.74809	-1.9563	-0.337288	-2.37607	0.02354	0.177434
TGAAGACCACGCCTAGACAG	DCP1A	Not Significant in Both and Not Common Essential	No	0.342667	0.320882	0.518453	0.0878298	0.813215	1.36862	1.58879	0.00592224	0.0585653	0.166747	1.34328	0.000184565	0.000214316	0.342667	0.134224	0.519777	0.13792	0.116127	0.00209542	0.000182687	0.00018746	0.000176006	0.000145966	0.000134751	0.000168232	0.00017354	0.629938	0.486357	-1.17116	-1.14257	-0.284287	0.413457	-2.67749	-3.57915	-1.80656	-3.45411	-2.86672	-2.81941	-2.96358	-3.58629	-2.91372	-2.82553	-0.915612	-2.90449	0.0343247	0.608004
GTCTGCACTTACGGGCACCA	PLIN4	Not Significant in Both and Not Common Essential	No	0.506921	0.348191	0.342247	0.959102	0.556996	0.756687	0.0574478	0.0611965	0.187897	0.73326	0.000183759	0.116276	0.000214316	0.506921	1.39977	0.591363	0.444035	1.18952	0.000209542	0.000182687	0.00018746	0.000176006	0.000145966	0.000134751	0.000168232	0.00017354	0.337099	-0.775066	-1.19514	-0.471932	0.32344	-3.27009	-0.916375	-3.4148	-3.82479	-3.51015	-3.37451	-3.82984	-3.9818	-3.64232	-3.42151	-3.83597	-1.17286	-3.67761	0.0134064	0.0848933
TGCCGGAGGAGTGGTCGCAG	HSPB1	Not Significant in Both and Not Common Essential	No	0.315764	0.252609	0.403241	0.0421583	0.141106	0.39918	1.85808	0.00394816	0.000244022	0.164609	1.55092	0.000184565	0.00428632	0.315764	0.217315	0.158734	0.0941892	0.373491	0.000209542	0.000182687	0.00018746	0.000176006	0.000145966	0.000134751	0.00168232	0.00017354	0.19872	0.6635	-1.02849	-2.76212	-0.185995	0.585025	-2.35873	-1.51746	-3.01582	-2.93896	-2.70109	-3.32675	-3.17284	-3.07114	-1.74809	-3.33288	-0.800694	-2.91345	0.0103551	0.36429
GCCCGCTTCAAGGAACGGGT	KIAA1143	DepMap Common Essential	Yes	0.273284	0.0819273	0.101657	0.375912	0.352764	0.910218	0.0179524	0.0394816	0.000244022	0.927798	0.000183759	0.000184565	0.000214316	0.273284	0.150203	0.180521	0.0807336	0.0502173	0.000209542	0.000182687	0.00018746	0.000176006	0.000145966	0.000134751	0.000168232	0.00017354	1.04572	-0.753015	-0.978691	-3.16006	1.05402	-2.74289	-3.30894	-3.21643	-2.85541	-2.99482	-2.63415	-2.45533	-3.01243	-3.127	-2.68115	-2.46145	-1.50753	-2.77772	0.0201403	0.999642
GTAGGTGAAGATCTCTCGAT	NR1D1	Not Significant in Both and Not Common Essential	No	0.305852	0.170682	0.0677716	0.470768	0.252505	2.60564	0.00359049	0.120419	0.000244022	3.03779	0.00367518	0.0129196	0.00214316	0.305852	0.380302	0.0840358	0.114373	0.0941573	0.000209542	0.000182687	0.00018746	0.000176006	0.00145966	0.000134751	0.00168232	0.00017354	1.18373	-1.27589	-0.592112	-3.01484	1.25037	-1.26577	-1.56156	-2.07122	-3.25886	-2.66276	-2.78541	-2.72833	-2.41588	-2.79493	-1.83241	-2.73445	-0.918412	-2.65163	0.0336917	0.344552
TTTCAATGTGGGCTTCAAAG	B4GALT6	Not Significant in Both and Not Common Essential	No	0.337004	0.0921683	0.169429	0.0667507	0.107686	1.8665	0.0412906	0.00592224	0.00244022	3.88649	0.000183759	0.000184565	0.000214316	0.337004	0.0351539	0.099598	0.211926	0.276195	0.000209542	0.00182687	0.00018746	0.000176006	0.000145966	0.00134751	0.000168232	0.00017354	1.30645	-0.613137	-1.05197	-1.64473	1.62498	-2.96474	-2.55831	-2.7011	-2.2247	-1.73654	-3.05328	-3.19569	-2.38172	-1.86872	-3.10028	-3.20182	-1.07532	-2.59534	0.0260967	0.298536
TATTGAGCGATTTCGCAGAG	PIK3R3	Not Significant in Both and Not Common Essential	No	0.395059	0.744173	0.986077	0.168633	0.152246	0.0021933	2.48641	1.00678	0.00244022	0.000213778	1.90374	0.588764	0.00214316	0.395059	0.386693	0.575801	0.158103	0.279333	0.000209542	0.000182687	0.0018746	0.000176006	0.00145966	0.000134751	0.000168232	0.00017354	-2.53058	0.401662	0.775992	-1.79512	-3.54171	0.285697	0.542999	-1.85149	-3.2661	-3.49856	-1.92603	-3.20059	-2.42311	-3.63074	-2.97303	-3.20672	-0.964068	-3.01561	0.0066068	0.51259
GGTGTGGTTGCAAGACCCAT	CNOT7	DepMap Common Essential	Yes	0.363907	0.382328	0.35919	1.44744	0.289638	1.35984	0.710916	1.56347	0.065886	0.741811	0.376705	1.58911	0.0535789	0.363907	0.294015	0.457528	0.148012	1.33076	0.000209542	0.000182687	0.00018746	0.00352011	0.000145966	0.000134751	0.000168232	0.00017354	0.551052	0.296494	0.033489	-0.643062	0.287857	0.0206771	0.0405534	-0.732862	-3.1471	-3.39871	-2.89739	-2.57754	-3.30412	-3.53089	-2.94439	-3.8847	-0.0182252	-3.2106	0.0683812	0.463452
ATGTACTATATCCTGGACGA	NLRP12	Significant in Both and Not Common Essential	No	0.62728	0.62811	0.559116	0.456715	0.49387	0.581224	0.784521	0.0848855	0.000244022	0.215916	0.21316	0.00553696	0.000214316	0.62728	0.255665	0.401504	0.99235	0.169483	0.000209542	0.000182687	0.00018746	0.000176006	0.000145966	0.000134751	0.000168232	0.00017354	-0.0336922	0.147103	-0.730812	-3.30618	-0.463751	-0.418796	-1.91637	-3.36256	-3.0864	-3.34198	-3.72376	-2.9836	-3.24342	-3.47416	-3.77076	-2.98973	-1.26063	-3.32672	0.0296562	0.0190859
TCCTACAGCTCCGTAATGGG	SFMBT1	Not Significant in Both and Not Common Essential	No	0.621616	0.365259	0.35919	0.333753	0.761228	0.666762	0.00179524	0.0217149	0.729626	0.196676	0.000183759	0.00184565	0.263608	0.621616	0.453805	0.445079	0.635777	1.35273	0.000209542	0.000182687	0.00018746	0.000176006	0.000145966	0.000134751	0.000168232	0.00017354	0.26137	-2.3012	-1.18667	-0.0184145	-0.26885	-3.29108	-2.25728	-0.460556	-3.3356	-3.38673	-3.5304	-3.88568	-3.49262	-3.51891	-3.5774	-3.89181	-1.19033	-3.57739	0.013852	0.0928194
GAAAAGTGGCATTGGTCATG	GPATCH11	Not Significant in Both and Not Common Essential	No	0.406387	0.174096	0.308361	0.217818	0.716669	3.87994	0.066424	0.0592224	0.597854	5.34446	0.000183759	0.00184565	0.0835832	0.406387	0.495351	0.158734	0.124464	0.169483	0.00209542	0.000182687	0.00018746	0.000176006	0.00145966	0.00134751	0.000168232	0.0017354	1.34804	-0.666734	-0.565608	-0.0787235	1.48712	-3.22481	-2.07194	-0.9332	-2.37364	-2.93896	-2.82214	-2.9836	-2.53066	-2.07114	-2.86914	-1.98973	-0.588234	-2.57237	0.022944	0.276087
TGAATCGAATCAAATCCGCA	OS9	Not Significant in Both and Not Common Essential	No	0.573472	0.310641	0.14232	0.0667507	0.278498	0.234683	1.40927	0.00197408	0.675941	0.000213778	4.07026	0.00369131	0.210029	0.573472	0.214119	0.295682	0.174923	0.348382	0.00209542	0.000182687	0.00018746	0.00176006	0.000145966	0.000134751	0.000168232	0.00017354	-0.121777	0.995728	-1.52909	0.385087	-3.1623	1.45636	-1.25728	-0.122543	-2.00938	-3.20912	-2.96994	-2.29653	-3.1664	-3.34129	-3.01694	-3.30266	-0.419476	-2.91403	0.0101519	0.305783
AGTTCTGCAGATATGTCAGT	CCDC141	Not Significant in Both and Not Common Essential	No	0.363907	0.221887	0.562505	0.126475	0.259932	0.0021933	0.000179524	2.44589	0.000244022	0.000213778	0.00183759	3.13023	0.000214316	0.363907	0.488959	0.0964856	0.033639	0.0533558	0.000209542	0.000182687	0.00018746	0.000176006	0.000145966	0.00134751	0.00168232	0.00017354	-2.00503	-3.496	1.28643	-3.02743	-3.01617	-2.48588	1.39357	-3.08381	-3.368	-2.72275	-2.25393	-2.48165	-3.52502	-1.85493	-1.30093	-2.48778	-1.80429	-2.49938	0.0883644	0.428857
GGCCCATCCCCTACCAGCGA	MAP2K2	Not Significant in Both and Not Common Essential	No	0.257709	0.194577	0.0304972	0.309161	0.111399	0.0241263	0.000179524	1.13904	0.000244022	0.000213778	0.000183759	0.708731	0.000214316	0.257709	0.169378	0.420179	0.141284	0.48648	0.000209542	0.000182687	0.00018746	0.000176006	0.000145966	0.000134751	0.000168232	0.00017354	-0.906601	-2.23014	0.566354	-2.65945	-2.95913	-2.22001	0.360297	-2.71583	-2.90759	-3.36173	-2.87718	-3.44154	-3.06461	-3.4939	-2.92418	-3.44767	-1.59556	-3.1898	0.0124422	0.752161
TAGGATGACGAGGAAATCTG	NR1H4	Not Significant in Both and Not Common Essential	No	0.290276	0.546182	1.34866	0.614809	0.345338	0.629476	5.89378	0.00197408	3.02831	0.288601	6.10814	0.0276848	5.18001	0.290276	0.255665	0.208533	0.21529	0.439401	0.00209542	0.000182687	0.0018746	0.00352011	0.00291933	0.00134751	0.000168232	0.00347079	0.0616418	0.640491	-2.49338	0.942956	-0.27704	0.656007	-1.3465	1.17609	-2.0864	-3.05747	-2.06012	-2.0963	-1.94239	-2.18964	-3.10712	-2.10243	-0.0799665	-2.33023	0.00264725	0.0776969
CTCCCATCACATTAAAACCA	LIN7A	Not Significant in Both and Not Common Essential	No	0.397891	0.194577	0.155875	0.551571	0.222799	0.021933	0.0251334	0.744228	0.000244022	0.0427557	0.00183759	1.03541	0.000214316	0.397891	0.0958743	0.298794	0.171559	0.649686	0.000209542	0.000182687	0.00018746	0.000176006	0.000145966	0.000134751	0.000168232	0.00017354	-0.947993	-0.792525	0.130105	-2.96048	-0.658097	-1.92853	0.273511	-3.01686	-2.66043	-3.21366	-2.9615	-3.56718	-2.81745	-3.34584	-3.0085	-3.5733	-1.23761	-3.14348	0.0290453	0.675589
ATCTGGAGCAAACAGAATGT	CCDC174	DepMap Common Essential	Yes	0.62728	0.249196	0.105046	0.432123	0.245078	0.021933	2.31586	0.000197408	0.422158	0.000213778	1.15033	0.00369131	0.100728	0.62728	0.194944	0.180521	0.400304	0.191453	0.000209542	0.000182687	0.00018746	0.00176006	0.000145966	0.000134751	0.000168232	0.00017354	-1.05544	1.34333	-3.34024	0.236171	-3.06658	1.03944	-2.06843	-0.386154	-2.96864	-2.99482	-3.32948	-2.03653	-3.12566	-3.127	-3.37648	-3.04266	-0.912237	-3.00016	0.0218094	0.595464
AGAACTGTCAAGAAAACCTG	CKAP2L	Not Significant in Both and Not Common Essential	No	0.460194	0.228714	0.132155	0.361859	0.278498	0.00877319	0.00179524	1.02455	0.124451	0.00213778	0.00918794	2.4621	0.0107158	0.460194	0.162986	0.295682	0.0740058	0.194592	0.000209542	0.000182687	0.00018746	0.000176006	0.00145966	0.000134751	0.000168232	0.00017354	-1.41614	-1.86696	0.451994	-0.349824	-2.02933	-1.15787	0.832766	-1.4148	-2.89088	-3.20912	-2.59636	-3.0436	-2.0479	-3.34129	-2.64336	-3.04973	-0.868769	-2.85278	0.0228871	0.622151
GAGCAGAGGAAAGCCCGCGC	CMTM3	Not Significant in Both and Not Common Essential	No	0.480018	0.119477	0.247366	0.277542	0.278498	0.0021933	0.00179524	0.000197408	4.49977	0.000213778	0.000183759	0.00369131	5.5915	0.480018	0.19814	0.174296	0.107645	0.150652	0.000209542	0.000182687	0.00018746	0.00176006	0.000145966	0.00134751	0.000168232	0.00347079	-1.73619	-2.13922	-3.14796	1.20837	-2.74732	-3.12909	-1.87615	1.30271	-2.9757	-2.97958	-2.75909	-1.93245	-3.13272	-2.11176	-2.80609	-1.63755	-1.53311	-2.54187	0.028758	0.277192
TGAAGATGGTACGCAGGCAT	ARMC8	Not Significant in Both and Not Common Essential	No	0.400723	0.361846	0.613333	0.5059	0.196805	2.27664	0.118486	0.250708	0.00244022	1.3468	0.0551276	0.0922827	0.000214316	0.400723	0.294015	0.189859	0.033639	0.200869	0.000209542	0.000182687	0.0018746	0.000176006	0.000145966	0.000134751	0.000168232	0.00017354	0.798771	-0.714029	-0.304896	-1.90661	0.570779	-1.04633	-0.738944	-2.96298	-3.1471	-3.01672	-1.25393	-3.05739	-3.30412	-3.1489	-2.30093	-3.06351	-0.78803	-2.78658	0.0213618	0.746778
AAGGCCGTCTGAGAAAGTCA	RARB	Not Significant in Both and Not Common Essential	No	0.420546	0.55301	0.277864	0.144041	0.0779795	0.980404	0.238767	0.000197408	0.000244022	2.09717	0.31239	0.000184565	0.000214316	0.420546	0.188553	0.121385	0.144648	0.0564944	0.000209542	0.000182687	0.00018746	0.000176006	0.00145966	0.000134751	0.000168232	0.00017354	0.248672	-0.065858	-2.86312	-2.50455	0.578901	0.0508648	-2.89234	-2.56093	-2.95416	-2.82246	-2.8874	-2.50648	-2.11118	-2.95463	-2.9344	-2.51261	-1.25104	-2.71042	0.0405602	0.580784
GGCTGCGCACCTACCCACAG	LIMS2	Not Significant in Both and Not Common Essential	No	0.157174	0.0887546	0.108435	0.115935	0.753802	1.44538	0.000179524	0.00394816	0.124451	2.10358	0.000183759	0.000184565	0.28504	0.157174	0.17577	0.099598	0.0504585	0.147513	0.000209542	0.000182687	0.00018746	0.000176006	0.000145966	0.000134751	0.000168232	0.0017354	1.21179	-2.78105	-1.46782	-0.782259	1.37477	-2.77092	-2.79807	-0.422351	-2.92367	-2.73654	-2.43003	-2.9233	-3.08069	-2.86872	-2.47703	-1.92943	-1.05449	-2.67118	0.00520092	0.446223
TCCAAGAGTGACAGAGTCGT	IKZF1	Not Significant in Both and Not Common Essential	No	0.17275	0.18775	0.0847145	0.196739	0.0631262	0.0021933	0.00179524	0.627758	0.000244022	0.000213778	0.00183759	1.21813	0.00214316	0.17275	0.878848	0.049799	0.682872	0.420569	0.000209542	0.000182687	0.00018746	0.000176006	0.000145966	0.000134751	0.000168232	0.00017354	-1.93248	-1.67384	0.503902	-2.41278	-2.94362	-1.66371	0.791803	-1.46916	-3.62264	-2.43551	-3.56143	-3.37831	-3.77966	-2.56769	-3.60843	-3.38444	-1.34998	-3.29226	0.046005	0.59446
TGCCTGTGAAGCGAAGTCAT	PIK3R5	Not Significant in Both and Not Common Essential	No	0.504089	0.143373	0.467624	0.231871	0.230225	0.0021933	0.0484715	2.91177	0.000244022	0.00427557	0.0679907	4.58091	0.000214316	0.504089	0.131028	0.11516	0.363301	0.379768	0.000209542	0.000182687	0.00018746	0.000176006	0.000145966	0.00134751	0.00168232	0.0017354	-1.81537	-0.98441	1.09891	-2.97472	-1.52547	-0.837447	1.29571	-3.0311	-2.79609	-2.79959	-3.28736	-3.33399	-2.95311	-1.93177	-2.33436	-2.34012	-1.09674	-2.72205	0.0170451	0.347955
AAGTTGTGAGCTCTTAGTAA	ZNF383	Not Significant in Both and Not Common Essential	No	0.519665	0.296987	0.101657	0.337266	0.401037	0.859772	0.0287239	0.0414557	0.0341631	0.799531	0.0826914	0.00553696	0.000214316	0.519665	0.153399	0.224095	2.58011	0.838	0.000209542	0.000182687	0.00018746	0.000176006	0.000145966	0.000134751	0.000168232	0.00017354	0.461646	-0.548894	-0.910388	-1.06963	0.430098	-0.0896769	-1.7847	-3.27213	-2.86455	-3.08872	-4.13873	-3.67772	-3.02157	-3.2209	-4.18573	-3.68384	-0.847959	-3.48522	0.125149	0.514877
TCTTAGAAGAAATCCCAGCT	SPINT4	Not Significant in Both and Not Common Essential	No	0.504089	0.822687	0.630276	0.200252	0.178239	0.708435	2.33202	0.00592224	0.119571	0.320668	3.02467	0.00184565	0.124303	0.504089	0.380302	0.183634	0.282568	0.304442	0.000209542	0.000182687	0.00374919	0.000176006	0.000145966	0.000134751	0.000168232	0.00017354	-0.0649346	0.568202	-1.52909	-0.173377	-0.409179	0.681147	-2.03543	-0.156521	-3.25886	-3.00225	-1.87719	-3.23798	-3.41588	-3.13442	-3.22521	-3.2441	-0.389898	-3.04949	0.00348143	0.427856
CTAGTTCTCAGGTCCTAGTG	ARHGEF2	Not Significant in Both and Not Common Essential	No	0.278948	0.0512046	0.667551	0.597243	0.185665	0.00021933	0.281853	0.548794	0.173256	0.00213778	0.391406	0.345137	0.105015	0.278948	0.140616	0.289457	0.208562	1.36842	0.000209542	0.000182687	0.00018746	0.000176006	0.000145966	0.000134751	0.000168232	0.00017354	-2.36821	-0.374462	-0.0367417	-0.0300418	-1.37935	-0.231857	-0.23816	-0.247479	-2.82676	-3.19988	-3.04633	-3.89069	-2.98378	-3.33205	-3.09333	-3.89682	-0.613287	-3.28371	0.117119	0.394484
GCTGTTCATTGTCGTAGACA	ADAM9	Not Significant in Both and Not Common Essential	No	0.278948	0.320882	0.0982689	0.115935	0.0816928	3.13861	0.000179524	0.000197408	0.0146413	0.887181	0.000183759	0.00184565	0.000214316	0.278948	0.111853	0.10271	0.00033639	0.0439401	0.000209542	0.00182687	0.00018746	0.000176006	0.000145966	0.000134751	0.000168232	0.00017354	0.990392	-2.73829	-2.76885	-0.746604	0.441667	-2.72817	-1.79807	-2.58113	-2.72738	-1.74991	-0.253934	-2.39733	-2.8844	-2.88208	-0.300934	-2.40346	-1.49113	-1.94993	0.0866276	0.43521
GCTGCCATTGAAAAAAATGG	MRPL15	Significant in Both and Not Common Essential	No	0.458778	0.467669	0.748877	0.537518	0.887481	1.0484	0.000179524	0.238864	0.234261	0.0662713	0.000183759	0.22517	0.0107158	0.458778	0.182161	0.759435	0.134556	0.276195	0.000209542	0.000182687	0.00018746	0.000176006	0.000145966	0.000134751	0.000168232	0.00017354	0.350588	-3.62029	-0.352242	-0.578459	-0.848613	-3.61016	-0.377882	-1.91813	-2.93918	-3.61878	-2.85599	-3.19569	-3.0962	-3.75096	-2.90299	-3.20182	-1.3694	-3.1952	0.0334379	0.0239631
AGGTGGGAACCGTATCACAC	EML2	Not Significant in Both and Not Common Essential	No	0.416298	1.04799	0.416796	0.133501	0.200519	0.00438659	3.49713	0.0098704	0.0854077	0.0192401	5.15627	0.00184565	0.0257179	0.416298	1.93666	0.684736	0.602138	0.213423	0.00419084	0.000182687	0.00018746	0.000176006	0.00145966	0.000134751	0.000168232	0.00017354	-2.37823	0.923788	-1.13115	-0.370659	-1.73615	1.09241	-1.85934	-0.89192	-2.66475	-3.57382	-3.50679	-3.08371	-3.1228	-3.70599	-3.55379	-3.08984	-0.793905	-3.28769	0.0637133	0.401156
GCCAGCGGCGAGTACTGCCA	SHISA2	Not Significant in Both and Not Common Essential	No	0.232221	0.0921683	0.0847145	0.0597243	0.787221	0.00021933	0.000179524	0.00197408	0.646658	0.000213778	0.00183759	0.00184565	1.16373	0.232221	0.0447414	0.10271	0.141284	0.081603	0.000209542	0.000182687	0.00018746	0.000176006	0.000145966	0.000134751	0.000168232	0.00017354	-2.62348	-2.67384	-1.48079	-0.085422	-2.63462	-1.66371	-1.51	0.169756	-2.32944	-2.74991	-2.87718	-2.66618	-2.48646	-2.88208	-2.92418	-2.67231	-1.56276	-2.69847	0.0197681	0.909676
ACATTAGTGGGACATACAGG	FBXW7	Not Significant in Both and Not Common Essential	No	0.501257	1.00702	0.823425	0.0351319	0.334198	0.171077	0.547549	0.000197408	0.873599	0.0470313	0.0128631	0.00184565	0.158594	0.501257	0.524113	0.105823	0.228745	0.119266	0.000209542	0.000182687	0.00018746	0.000176006	0.000145966	0.000134751	0.000168232	0.00017354	-0.769846	-0.177201	-2.25034	0.417308	-1.33065	-1.80628	-1.27955	-0.323717	-3.39815	-2.76287	-3.08644	-2.83099	-3.55517	-2.89505	-3.13344	-2.83712	-0.940034	-3.0624	0.0315396	0.170047
TCATACTTGTTGCAGAAGAG	EYA4	Not Significant in Both and Not Common Essential	No	0.436122	0.51546	0.240589	0.259976	0.163386	1.81166	0.0448811	0.00394816	0.000244022	1.66747	0.000183759	0.000184565	0.000214316	0.436122	0.575246	0.25522	0.0639141	0.257363	0.000209542	0.000182687	0.00018746	0.000176006	0.00145966	0.000134751	0.000168232	0.00017354	0.545882	-0.729212	-1.81854	-2.82579	0.509863	-3.11703	-3.14878	-2.88216	-3.43858	-3.14521	-2.53269	-3.16502	-2.5956	-3.27738	-2.57969	-3.17115	-1.68322	-2.98816	0.0220559	0.696331
TCAGCTGACACAGAATGACT	TREML4	Not Significant in Both and Not Common Essential	No	0.298772	0.290159	0.254144	0.463741	0.100259	0.00438659	3.472	0.509313	0.00732066	0.00641335	3.68436	0.374668	0.000214316	0.298772	0.619987	0.099598	0.0975531	0.169483	0.000209542	0.000182687	0.00374919	0.000176006	0.000145966	0.00134751	0.000168232	0.00017354	-1.82051	1.1355	0.0407093	-1.13657	-1.65555	1.16128	-0.0926289	-2.67007	-3.47111	-2.73654	-1.4153	-2.9836	-3.62813	-1.86872	-2.76333	-2.98973	-0.62973	-2.73206	0.0587799	0.241567
ATTGCCACCTAGAGTAACCA	NUDT12	Not Significant in Both and Not Common Essential	No	0.339835	0.167268	0.460847	2.23439	0.813215	2.27445	0.00538573	0.000197408	0.592974	2.88173	0.000183759	0.00184565	0.233604	0.339835	2.10924	0.171184	0.292659	0.103573	0.000209542	0.000182687	0.00018746	0.000176006	0.000145966	0.000134751	0.00336465	0.00017354	1.13346	-1.93231	-4.05379	-0.13717	1.23624	-3.39931	-3.08301	-0.541725	-4.00285	-2.97176	-3.19345	-2.76972	-4.15987	-3.10393	-1.93942	-2.77585	-1.3472	-3.11461	0.186814	0.923742
CTTTCAAGCCAAAGTCGCCT	COL6A2	Not Significant in Both and Not Common Essential	No	0.263372	0.109236	0.403241	0.133501	0.048273	0.00438659	1.13639	0.000197408	0.000244022	0.000213778	0.657856	0.00184565	0.000214316	0.263372	0.0958743	0.23032	0.00033639	0.0564944	0.000209542	0.000182687	0.00018746	0.000176006	0.000145966	0.000134751	0.000168232	0.00017354	-1.39624	0.449963	-2.83012	-2.29628	-2.7084	0.212566	-1.85934	-2.35265	-2.66043	-3.10062	-0.253934	-2.50648	-2.81745	-3.2328	-0.300934	-2.51261	-1.59756	-2.17316	0.063241	0.843895
ACTGGAGCCTTATTGGAGGT	HACD2	Not Significant in Both and Not Common Essential	No	0.542321	1.24598	0.352413	0.453202	1.19197	0.118438	0.000179524	0.000197408	1.50562	0.000213778	0.062478	0.000184565	2.3189	0.542321	0.457001	0.72831	0.208562	0.762675	0.000209542	0.000182687	0.0018746	0.000176006	0.000145966	0.000134751	0.000168232	0.00017354	-1.02202	-3.29293	-3.36093	0.10145	-3.76555	-0.751325	-3.39014	0.289017	-3.33865	-3.60061	-2.04633	-3.63681	-3.49567	-3.73278	-3.09333	-3.64294	-1.89905	-3.32339	0.00580749	0.504217
CTTGATCAACCTAACCCAAG	SGMS1	Not Significant in Both and Not Common Essential	No	0.315764	0.0989955	0.989466	0.151067	0.103973	0.00021933	1.65521	0.00197408	0.000244022	0.00213778	2.33741	0.00369131	0.00214316	0.315764	0.255665	0.155622	0.0033639	0.119266	0.000209542	0.000182687	0.0018746	0.000176006	0.000145966	0.000134751	0.000168232	0.00017354	-2.65452	0.223452	-1.8838	-2.62949	-1.66565	0.373334	-1.61199	-1.68587	-3.0864	-2.93036	-0.253934	-2.83099	-3.24342	-3.06254	-1.30093	-2.83712	-1.44182	-2.44321	0.0355882	0.661308
TATCAGCTATTATACTGACA	PIK3AP1	Not Significant in Both and Not Common Essential	No	0.271868	0.0512046	0.260921	0.0386451	0.096546	0.00021933	0.556525	0.000197408	0.214739	0.00213778	1.00884	0.00184565	0.0150021	0.271868	0.140616	0.305019	0.0840975	0.0784645	0.000209542	0.000182687	0.00018746	0.000176006	0.000145966	0.000134751	0.000168232	0.00017354	-2.36821	0.328976	-2.29173	0.347177	-1.37935	0.587313	-1.32095	-0.808582	-2.82676	-3.22262	-2.65187	-2.64915	-2.98378	-3.35479	-2.69887	-2.65527	-0.863169	-2.88039	0.0207431	0.579611
CAAGGAATACCACATACCCG	LMBR1L	Not Significant in Both and Not Common Essential	No	0.178414	0.320882	0.0711602	0.425096	0.0259932	1.33133	0.000179524	0.00197408	0.000244022	0.461761	0.000183759	0.000184565	0.000214316	0.178414	0.252469	0.10271	0.067278	0.191453	0.000209542	0.000182687	0.00018746	0.000176006	0.000145966	0.000134751	0.000168232	0.00017354	0.61794	-2.59811	-2.33312	-2.02743	0.158072	-2.58799	-3.36234	-2.08381	-3.08094	-2.74991	-2.55496	-3.03653	-3.23796	-2.88208	-2.60196	-3.04266	-1.7771	-2.89838	0.00864548	0.914923
GTTCTTTGAGGCTGTAAACG	FANCC	Not Significant in Both and Not Common Essential	No	0.229389	0.0648591	0.186372	0.695612	0.226512	0.0416726	0.658854	0.00197408	0.000244022	0.00213778	1.08601	0.000184565	0.00214316	0.229389	0.300406	0.0715861	0.1211	0.367214	0.000209542	0.000182687	0.00018746	0.000176006	0.000145966	0.000134751	0.000168232	0.00017354	-0.19212	0.548409	-2.547	-2.96766	-1.48201	0.765453	-3.57622	-2.02404	-3.15644	-2.59312	-2.81024	-3.31939	-3.31346	-2.7253	-2.85724	-3.32552	-1.4344	-3.01259	0.0164633	0.763154
GCTGTGAGTTATACTAACAC	PEX5L	Not Significant in Both and Not Common Essential	No	0.382315	0.658832	0.698048	0.129988	0.894907	0.109665	0.0394953	0.000197408	0.529528	0.000213778	0.10658	0.000184565	1.003	0.382315	0.17577	0.314356	0.359937	0.194592	0.000209542	0.000182687	0.00018746	0.000176006	0.000145966	0.000134751	0.000168232	0.00017354	-0.778707	-1.24734	-2.81854	-0.227889	-3.48881	-0.81621	-2.84775	0.049523	-2.92367	-3.23571	-3.28332	-3.0436	-3.08069	-3.36789	-3.33032	-3.04973	-1.52197	-3.16437	0.00255642	0.105384
TAGACGTTGTTCTCACACAG	NPRL3	Not Significant in Both and Not Common Essential	No	0.261957	1.54979	0.274475	0.33024	0.159672	1.54627	0.935321	0.0611965	0.00976088	0.968416	0.281151	0.00369131	0.000214316	0.261957	0.271644	0.476203	0.127828	0.273056	0.000209542	0.000182687	0.00018746	0.000176006	0.000145966	0.000134751	0.000168232	0.0017354	-0.000987524	0.532458	-0.732103	-1.21374	-0.204211	0.0104368	-1.95165	-2.87217	-3.11273	-3.41608	-2.83372	-3.19072	-3.26975	-3.54826	-2.88072	-2.19685	-0.803996	-3.0561	0.00719143	0.908702
TATGGTTATACCGGTCCCAG	EPC1	Not Significant in Both and Not Common Essential	No	0.242133	0.0955819	0.155875	0.144041	0.259932	1.13832	0.00718097	0.00394816	0.000244022	0.630646	0.000183759	0.000184565	0.000214316	0.242133	0.111853	0.12761	0.151375	0.222839	0.000209542	0.000182687	0.00018746	0.000176006	0.000145966	0.000134751	0.000168232	0.00017354	1.07589	-1.33659	-1.56209	-3.02743	0.81941	-2.92853	-2.89234	-3.08381	-2.72738	-2.84418	-2.90715	-3.10246	-2.8844	-2.97635	-2.95415	-3.10859	-1.61694	-2.93808	0.00276451	0.788818
CCCCTTATGAGAATAAGGCG	ADAM30	Not Significant in Both and Not Common Essential	No	0.13027	0.146786	0.040663	0.193226	0.0371331	0.684309	0.000179524	0.000197408	0.00244022	1.09241	0.000183759	0.000184565	0.000214316	0.13027	0.0798953	0.149397	0.0908253	0.210285	0.000209542	0.000182687	0.00018746	0.000176006	0.000145966	0.000134751	0.000168232	0.00017354	0.668568	-2.35508	-2.9907	-1.18233	0.871701	-2.34495	-3.01992	-2.23871	-2.58125	-2.91263	-2.6853	-3.07728	-2.73827	-3.04481	-2.7323	-3.08341	-1.57393	-2.85691	0.0047811	0.483985
CGCACTGGCACAGAACACGT	CARKD	Not Significant in Both and Not Common Essential	No	0.229389	0.976301	0.081326	0.0632375	0.226512	1.1778	0.00179524	0.000197408	0.00976088	0.585753	0.000183759	0.000184565	0.000214316	0.229389	0.0703078	0.0404617	0.067278	0.116127	0.000209542	0.000182687	0.00018746	0.000176006	0.000145966	0.000134751	0.000168232	0.00017354	0.0814878	-1.65611	-2.50561	-1.3656	-0.221869	-2.64598	-2.53483	-3.02404	-2.52573	-2.34534	-2.55496	-2.81941	-2.68275	-2.47751	-2.60196	-2.82553	-1.73407	-2.60415	0.0353691	0.692234
GTTAAAGGCTGAGTGGACCG	TOB1	Not Significant in Both and Not Common Essential	No	0.341251	0.0955819	0.728545	0.24241	0.129966	0.0021933	0.0610382	4.05871	0.100049	0.000213778	0.00367518	6.0316	0.231461	0.341251	0.166182	0.112048	0.437307	2.17503	0.000209542	0.000182687	0.00018746	0.000176006	0.00437899	0.00269502	0.000168232	0.00017354	-1.63928	-1.07685	1.22384	-0.113617	-2.65041	-2.29718	1.39588	0.250648	-2.89931	-2.7877	-3.36788	-4.09194	-1.57921	-1.61884	-3.41488	-4.09807	-0.613372	-2.98223	0.170414	0.271879
TGGTCAAGGACAATTGCCGG	CHRNA4	Not Significant in Both and Not Common Essential	No	0.202485	0.122891	0.308361	0.400504	0.568136	0.00021933	0.341096	0.00394816	1.5715	0.000213778	0.101067	0.000184565	1.78311	0.202485	0.127832	0.180521	0.0403668	0.0910188	0.000209542	0.000182687	0.00018746	0.00176006	0.000145966	0.000134751	0.000168232	0.00017354	-2.74842	0.0438172	-2.00621	0.441862	-2.75956	-0.48445	-3.33646	0.496726	-2.78537	-2.99482	-2.33312	-1.7136	-2.94239	-3.127	-2.38012	-2.71973	-1.29409	-2.62452	0.0121743	0.592022
ATATTAAACTCAATCAGCTG	CMTR1	DepMap Common Essential	Yes	0.290276	0.105823	0.115212	0.274029	0.0371331	0.0021933	0.00359049	2.48734	0.0292826	0.00213778	0.00183759	2.71865	0.152164	0.290276	0.444218	0.108935	0.0740058	0.0659101	0.000209542	0.000182687	0.00018746	0.000176006	0.00145966	0.000134751	0.00168232	0.00017354	-1.68348	-1.50634	0.957939	-0.103152	-1.69462	-1.79725	0.996557	0.612551	-3.32633	-2.77546	-2.59636	-2.57342	-2.48334	-2.90764	-1.64336	-2.57955	-0.527225	-2.61068	0.0572087	0.267707
CTGTTGTATCATTTACACGG	ZFYVE26	Not Significant in Both and Not Common Essential	No	0.337004	0.324296	0.342247	0.133501	0.0928327	0.00021933	1.98195	0.675136	0.00488044	0.00213778	2.51933	0.520474	0.00214316	0.337004	0.0990701	0.0871482	0.168195	0.166345	0.000209542	0.000182687	0.00018746	0.000176006	0.000145966	0.000134751	0.00168232	0.0017354	-3.16984	0.762753	0.703907	-1.27924	-2.18098	0.866945	0.590915	-1.63665	-2.67467	-2.67855	-2.9529	-2.97548	-2.83169	-2.81073	-1.9999	-1.98161	-0.667774	-2.61319	0.018559	0.228933
GCCTGGCGCTGGACTCCCCG	ZNF444	Not Significant in Both and Not Common Essential	No	0.523913	0.269677	0.247366	0.642914	0.274785	0.0021933	0.601406	0.971248	0.00488044	0.000213778	0.0643156	0.118122	0.000214316	0.523913	0.715862	0.286344	0.222017	0.533558	0.000209542	0.000182687	0.00018746	0.000176006	0.000145966	0.000134751	0.000168232	0.00017354	-2.08975	0.385828	0.179177	-1.75053	-3.10088	-0.585024	-0.735822	-3.10794	-3.53356	-3.19518	-3.07348	-3.48165	-3.69058	-3.32736	-3.12048	-3.48778	-1.35062	-3.36376	0.00711332	0.285019
ACTCGAACTCTCCCTATGAG	LILRB1	Not Significant in Both and Not Common Essential	No	0.349747	0.505219	0.240589	0.0526979	0.278498	0.0416726	0.00179524	0.000197408	0.529528	0.00427557	0.000183759	0.000184565	1.18302	0.349747	0.933177	0.326806	0.972167	0.285611	0.000209542	0.000182687	0.00018746	0.000176006	0.000145966	0.000134751	0.000168232	0.00017354	-1.08363	-2.12715	-2.42643	0.279067	-2.07249	-3.11703	-2.45564	0.62817	-3.64869	-3.25258	-3.71483	-3.21025	-3.80571	-3.38476	-3.76183	-3.21638	-1.54689	-3.49938	0.0209685	0.707669
GAATGAAGAACATCTGAGTG	OR52B6	Not Significant in Both and Not Common Essential	No	0.198237	0.0443773	0.647219	0.073777	0.148532	0.203977	0.700145	0.00394816	0.344071	0.0833736	0.332603	0.000184565	0.0921558	0.198237	0.773386	0.205421	0.168195	0.0439401	0.000209542	0.000182687	0.00018746	0.000176006	0.000145966	0.000134751	0.000168232	0.00017354	0.66242	0.0341367	-1.27153	0.364828	0.273868	-0.289125	-2.60177	-0.207297	-3.56713	-3.05094	-2.9529	-2.39733	-3.72414	-3.18311	-2.9999	-2.40346	-0.379308	-3.03487	0.0945392	0.986664
AGGTACACAAGGGTTTCCAA	TRMT10B	Significant in Both and Not Common Essential	No	1.1073	0.368673	0.423573	1.53878	0.816928	0.00021933	0.000179524	1.07193	0.302587	0.000213778	0.000183759	0.217787	0.167166	1.1073	0.258861	0.457528	0.205198	0.81603	0.000209542	0.000182687	0.00018746	0.000176006	0.000145966	0.000134751	0.000168232	0.00017354	-3.22554	-3.37281	-0.15701	-0.431334	-3.23668	-3.36268	-0.849145	-0.689036	-3.0918	-3.39871	-3.03926	-3.66618	-3.24881	-3.53089	-3.08626	-3.67231	-1.91553	-3.34178	0.0297425	0.0427543
CTCCCAGCTCCAGATACAGG	CD81	Not Significant in Both and Not Common Essential	No	0.489929	0.245782	0.393076	0.182686	0.779795	0.0021933	2.36074	0.785684	2.28405	0.00213778	1.81002	0.529703	3.44834	0.489929	0.172574	0.582026	0.117736	0.207146	0.000209542	0.000182687	0.0018746	0.000176006	0.00145966	0.00134751	0.00336465	0.00017354	-2.04945	0.778572	0.633543	0.466725	-2.06059	0.663207	0.462327	0.64563	-2.9157	-3.50323	-1.798	-3.07075	-2.07272	-2.63541	-1.54397	-3.07688	-0.0575045	-2.57708	0.0281543	0.0646965
GGAGAAGAGCATCTTTCTCG	SPCS2	DepMap Common Essential	Yes	0.307268	0.0887546	0.826814	1.16989	0.523577	0.00021933	0.141824	0.906103	0.000244022	0.000213778	0.396919	0.313761	0.000214316	0.307268	0.102266	0.214758	0.265748	0.103573	0.000209542	0.000182687	0.00018746	0.000176006	0.000145966	0.000134751	0.000168232	0.00017354	-2.60709	-0.765658	-0.110967	-3.33155	-2.61823	-0.318706	-0.571546	-3.38793	-2.68846	-3.07024	-3.15156	-2.76972	-2.84548	-3.20242	-3.19856	-2.77585	-1.71396	-2.96279	0.00894582	0.146217
AGAGGCCAACCAACCTTTGG	UMAD1	Not Significant in Both and Not Common Essential	No	0.543737	0.228714	0.745488	0.99072	0.159672	0.228103	0.473944	0.00394816	0.000244022	0.622095	0.42632	0.00184565	0.000214316	0.543737	0.249273	0.164959	0.393576	0.134959	0.000209542	0.000182687	0.00018746	0.000176006	0.000145966	0.000134751	0.000168232	0.00017354	-0.00116175	-0.196714	-2.39956	-2.8158	0.434564	-0.242705	-2.7298	-2.87217	-3.0754	-2.95567	-3.32212	-2.88467	-3.23242	-3.08784	-3.36912	-2.8908	-1.35292	-3.10226	0.0175632	0.127033
TGCAGCAGGCCCCCACACGA	CA12	Not Significant in Both and Not Common Essential	No	0.189741	0.0443773	0.264309	0.119449	0.0594129	0.00021933	0.791702	0.00394816	0.000244022	0.000213778	0.953708	0.000184565	0.00214316	0.189741	0.0798953	0.0778109	0.0033639	0.0408015	0.000209542	0.000182687	0.00018746	0.000176006	0.000145966	0.000134751	0.000168232	0.00017354	-2.30606	0.47645	-1.48079	-2.38645	-2.3172	0.557303	-2.81103	-1.44283	-2.58125	-2.62933	-1.25393	-2.36515	-2.73827	-2.76151	-1.30093	-2.37128	-1.46383	-2.25021	0.0663082	0.590582
TCCTTGAGGAGCGTCAGAAG	TIMMDC1	Not Significant in Both and Not Common Essential	No	0.209565	0.129718	0.237201	0.40753	0.155959	0.0021933	2.1525	0.112523	0.0610055	0.000213778	2.53587	0.12735	0.00214316	0.209565	1.07699	0.0311244	0.067278	0.64027	0.000209542	0.000182687	0.00018746	0.000176006	0.000145966	0.00269502	0.000168232	0.00017354	-1.7719	0.957827	-0.558918	-0.407641	-2.78304	1.02901	-0.505161	-1.86196	-3.71094	-2.23139	-2.55496	-3.56084	-3.86796	-1.06254	-2.60196	-3.56696	-0.737722	-2.8947	0.112971	0.331401
TGTACCTGTTGAACATTGAG	MYO10	Not Significant in Both and Not Common Essential	No	0.45453	0.310641	0.389687	0.179173	0.553283	0.0482525	0.226201	0.000197408	1.11274	0.000213778	0.170896	0.000184565	0.188598	0.45453	0.284427	0.606925	0.124464	1.0577	0.000209542	0.000182687	0.00018746	0.000176006	0.000145966	0.000134751	0.000168232	0.00017354	-0.808739	-0.236221	-2.95791	0.303446	-3.1623	-0.357984	-2.98712	-0.46741	-3.1327	-3.52143	-2.82214	-3.77884	-3.28972	-3.6536	-2.86914	-3.78496	-1.33428	-3.35656	0.0342045	0.303674
GGAAAGACGGACTTAAAGCA	PRPF4	DepMap Common Essential	Yes	0.174166	0.276505	0.0372744	0.0351319	0.252505	0.7852	0.0305191	0.000197408	0.000244022	0.921385	0.000183759	0.000184565	0.000214316	0.174166	0.0223707	0.264557	0.0033639	0.257363	0.000209542	0.000182687	0.00018746	0.000176006	0.000145966	0.000134751	0.000168232	0.00017354	0.453277	-0.0868389	-2.25034	-3.01484	0.522738	-2.30716	-2.27955	-3.07122	-2.02841	-3.16081	-1.25393	-3.16502	-2.18543	-3.29299	-1.30093	-3.17115	-1.50424	-2.44483	0.0618578	0.68588
GATGAGTAAAATGTCGCAGG	GOLGA8O	Not Significant in Both and Not Common Essential	No	0.2747	0.467669	0.254144	0.115935	0.237652	0.0021933	0.000179524	0.292164	0.566131	0.000213778	0.000183759	0.230707	0.634375	0.2747	0.281231	0.180521	0.1211	0.081603	0.000209542	0.000182687	0.00018746	0.000176006	0.000145966	0.000134751	0.000168232	0.00017354	-2.32884	-3.15096	0.401412	0.376975	-3.33998	-3.14083	0.298846	0.426405	-3.12779	-2.99482	-2.81024	-2.66618	-3.28481	-3.127	-2.85724	-2.67231	-1.30712	-2.94255	0.00939846	0.629696
CGGCATGAAGTGGGGCAACG	FZD5	Not Significant in Both and Not Common Essential	No	0.572056	0.307228	0.220258	0.393478	0.404751	0.0636056	0.0700145	0.720539	0.000244022	0.00213778	0.000183759	0.867457	0.000214316	0.572056	0.527309	0.314356	0.218653	0.448817	0.000209542	0.000182687	0.00018746	0.000176006	0.000145966	0.000134751	0.000168232	0.00017354	-0.683965	-0.497744	0.262737	-3.21976	-2.1575	-3.07868	0.343328	-3.27613	-3.40079	-3.23571	-3.06685	-3.40654	-3.55781	-3.36789	-3.11385	-3.41267	-1.53846	-3.32026	0.00323528	0.270518
GGAAGCTAATTCTTCTAGAA	RANBP9	Not Significant in Both and Not Common Essential	No	0.290276	0.0819273	0.267698	0.151067	0.334198	0.0175464	0.658854	0.0552743	0.380674	0.000213778	0.0496149	0.0406044	0.520787	0.290276	0.0766995	0.155622	0.0504585	0.02197	0.000209542	0.000182687	0.00018746	0.000176006	0.000145966	0.000134751	0.000168232	0.00017354	-0.669241	0.391144	-0.436646	0.0565494	-2.58347	-0.732033	-0.570597	0.192656	-2.56352	-2.93036	-2.43003	-2.0963	-2.72054	-3.06254	-2.47703	-2.10243	-0.543954	-2.54784	0.0695121	0.928611
TGGGACAGTTCCGGTTGGCG	NR2F2	Not Significant in Both and Not Common Essential	No	0.230805	0.440359	0.315138	0.0386451	0.263645	1.96958	1.42004	0.000197408	0.00244022	3.83732	2.12976	0.00369131	0.0171453	0.230805	0.508134	0.121385	0.541588	0.473925	0.000209542	0.000182687	0.00018746	0.000176006	0.00145966	0.000134751	0.00168232	0.00347079	0.650567	0.6538	-2.29173	-2.03359	0.940221	0.82983	-1.01991	-1.18687	-3.38471	-2.82246	-3.46076	-3.43018	-2.54173	-2.95463	-2.50776	-2.13528	-0.432211	-2.90469	0.0111002	0.112805
GGGTATATCTGATAGCCGCA	FBXO30	Not Significant in Both and Not Common Essential	No	0.225141	0.102409	0.0914917	0.0421583	0.0594129	0.274162	0.000179524	0.000197408	0.000244022	1.44514	0.000183759	0.00184565	0.000214316	0.225141	0.683904	0.258332	0.131192	0.0251086	0.000209542	0.000182687	0.00018746	0.000176006	0.000145966	0.000134751	0.000168232	0.00017354	0.427669	-2.70726	-2.32952	-2.38645	1.14957	-2.69713	-1.35873	-2.44283	-3.51372	-3.15047	-2.845	-2.1543	-3.67074	-3.28265	-2.892	-2.16042	-1.54309	-2.95866	0.0781497	0.559129
GGACAGACCTTCATGTACAG	TRPC5	Not Significant in Both and Not Common Essential	No	0.26762	0.648591	0.281252	0.17566	0.738948	0.0021933	0.0251334	0.000197408	3.3431	0.00213778	0.00183759	0.00184565	4.10415	0.26762	0.0894827	0.0373492	0.1211	0.213423	0.000209542	0.000182687	0.00018746	0.000176006	0.00145966	0.000134751	0.000168232	0.00347079	-2.47087	-1.04884	-2.94931	0.655535	-2.48201	-2.18485	-1.97852	0.744609	-2.63047	-2.31057	-2.81024	-3.08371	-1.78749	-2.44275	-2.85724	-1.78881	-1.46428	-2.46391	0.0255925	0.436129
TCTGATCAATGTCCTAATGT	EIF3H	DepMap Common Essential	Yes	0.695247	0.348191	0.674328	0.414557	0.616409	0.0197397	0.761183	0.000197408	0.175696	0.000213778	0.565977	0.00184565	0.192884	0.695247	0.185357	0.849695	0.131192	1.16441	0.000209542	0.000182687	0.00018746	0.000176006	0.000145966	0.000134751	0.000168232	0.00017354	-1.24648	0.0526179	-3.32222	-0.545107	-3.21185	-0.0760724	-2.35143	-0.504573	-2.94674	-3.66756	-2.845	-3.82058	-3.10376	-3.79973	-2.892	-3.82671	-1.40064	-3.36276	0.037639	0.0218089
GAGTAGCGCGAGCACAGCTA	B2M	Not Significant in Both and Not Common Essential	No	0.304436	0.0580319	0.227035	0.811547	0.263645	0.00021933	0.229791	0.215175	0.000244022	0.000213778	1.23486	0.0332218	0.000214316	0.304436	0.0894827	0.220983	0.0908253	0.000313858	0.000209542	0.000182687	0.00018746	0.000176006	0.000145966	0.000134751	0.000168232	0.00017354	-2.42257	0.0052402	-0.576522	-3.03359	-2.4337	0.735525	-1.38789	-3.08996	-2.63047	-3.08265	-2.6853	-0.251206	-2.78749	-3.21483	-2.7323	-0.257334	-1.52543	-2.2052	0.058964	0.557825
CGGGGCATTTACCTTCACGC	PDE8B	Significant in Both and Not Common Essential	No	0.821269	0.55301	0.379521	0.456715	0.961747	0.511038	0.416496	0.108574	0.0561251	0.382663	0.141494	0.0461414	0.0492926	0.821269	0.172574	0.921281	0.363301	0.342105	0.000209542	0.000182687	0.00018746	0.000176006	0.000145966	0.000134751	0.000168232	0.00017354	-0.0342798	0.040375	-0.623919	-1.2339	-0.159917	-0.428498	-0.995555	-1.29028	-2.9157	-3.70268	-3.28736	-3.28863	-3.07272	-3.83486	-3.33436	-3.29476	-0.590747	-3.34139	0.0231887	0.0142768
CAGAAACTTGGGTATACTGA	OR6C1	Not Significant in Both and Not Common Essential	No	0.436122	0.372087	0.237201	0.217818	0.115113	0.489105	0.000179524	0.637628	0.0170815	0.059858	0.000183759	0.507555	0.000214316	0.436122	0.281231	0.429516	0.343118	0.338966	0.000209542	0.000182687	0.00018746	0.000176006	0.000145966	0.000134751	0.000168232	0.00017354	0.118758	-3.12099	0.466474	-0.828598	-0.793522	-3.11087	0.367389	-2.73007	-3.12779	-3.37127	-3.26253	-3.28463	-3.28481	-3.50345	-3.30953	-3.29076	-1.20393	-3.30435	0.000243245	0.599002
ATAATTGGGAATTTGAGCAA	TAS2R13	Not Significant in Both and Not Common Essential	No	0.400723	0.245782	0.423573	1.24016	0.727809	0.00021933	0.00179524	0.418505	0.575892	0.000213778	0.00183759	0.502018	0.210029	0.400723	0.396281	0.177409	0.272476	0.687349	0.000209542	0.000182687	0.00018746	0.000176006	0.000145966	0.000134751	0.000168232	0.00017354	-3.04945	-2.37281	-0.471777	-0.101676	-3.06059	-2.36268	-0.392758	-0.539738	-3.27673	-2.98727	-3.16242	-3.59165	-3.43375	-3.11944	-3.20942	-3.59778	-1.54393	-3.29731	0.0108044	0.0925766
CAAAAGGATCCCCATCTCGA	OPN5	Not Significant in Both and Not Common Essential	No	0.897732	0.372087	1.28427	0.892351	0.267358	0.0241263	0.00359049	2.09845	0.000244022	0.000213778	0.00183759	1.45438	0.00428632	0.897732	0.501742	0.703411	0.403668	0.68421	0.000209542	0.000182687	0.00018746	0.000176006	0.000145966	0.000134751	0.00168232	0.00017354	-1.18815	-2.5535	0.371363	-3.03966	-3.24068	-2.84441	0.212142	-1.79501	-3.37921	-3.5855	-3.33312	-3.58966	-3.53623	-3.71768	-2.38012	-3.59579	-1.75974	-3.38966	0.00175137	0.419317
GTGTCAATCTGAATCATCAA	GRHL2	Not Significant in Both and Not Common Essential	No	0.448866	0.532528	0.0508287	0.382938	0.122539	0.00021933	0.000179524	3.13879	0.000244022	0.000213778	0.000183759	4.33729	0.00214316	0.448866	0.0223707	0.0746985	0.168195	0.150652	0.00209542	0.000182687	0.00018746	0.000176006	0.000145966	0.00134751	0.000168232	0.0017354	-3.38524	-2.45199	0.913634	-2.70085	-3.39638	-2.44186	1.05409	-1.75722	-1.02841	-2.6116	-2.9529	-2.93245	-2.18543	-1.74378	-2.9999	-1.93858	-1.77073	-2.29913	0.0800024	0.350506
GGGCTGAGCTCTTTACCGGA	SSC4D	Not Significant in Both and Not Common Essential	No	0.203901	0.3004	0.0304972	0.0878298	0.378757	0.210556	0.00179524	0.00197408	0.502685	0.0427557	0.000183759	0.000184565	0.945133	0.203901	0.0287623	0.183634	0.124464	0.059633	0.000209542	0.000182687	0.00018746	0.000176006	0.000145966	0.000134751	0.000168232	0.00017354	-0.154332	-1.23014	-1.64828	0.122935	-0.846706	-2.22001	-2.67749	0.397132	-2.13755	-3.00225	-2.82214	-2.52996	-2.29457	-3.13442	-2.86914	-2.53609	-1.03211	-2.66576	0.0242318	0.927307
ACAGAGTATTTAGAAGGCGT	ANKS1B	Not Significant in Both and Not Common Essential	No	0.370987	0.48815	0.718379	0.0948562	0.46045	2.00248	0.319553	0.00197408	0.11225	3.18744	0.284826	0.000184565	0.000214316	0.370987	0.143812	0.277007	0.376757	0.210285	0.00209542	0.000182687	0.00018746	0.000176006	0.000145966	0.000134751	0.00168232	0.00017354	0.613015	-0.351811	-1.6817	-0.612996	0.814889	-0.401774	-2.71092	-3.33213	-1.83652	-3.18078	-3.30315	-3.07728	-2.99354	-3.31296	-2.35015	-3.08341	-0.957928	-2.89223	0.00369777	0.493614
AGATGATAGACTTGCAGACG	BCS1L	Not Significant in Both and Not Common Essential	No	0.438954	0.0921683	0.853923	0.24241	0.167099	2.86883	0.10951	0.0592224	0.00244022	0.932074	0.031239	0.0276848	0.00214316	0.438954	0.0798953	0.186746	0.242201	0.134959	0.00209542	0.000182687	0.00018746	0.000176006	0.000145966	0.000134751	0.000168232	0.00017354	1.49312	-0.891965	-0.612065	-1.83554	1.00487	-1.43672	-0.942309	-1.89192	-1.58125	-3.00954	-3.11127	-2.88467	-2.73827	-3.14172	-3.15827	-2.8908	-0.639067	-2.81447	0.0249304	0.711996
TGAGACTGTAAAAATATGGG	WDR5B	Not Significant in Both and Not Common Essential	No	0.13027	0.440359	0.45407	0.411044	0.304491	2.7482	0.186705	0.100678	0.00488044	3.4568	0.062478	0.219633	0.00214316	0.13027	0.0639162	0.121385	0.144648	0.0439401	0.000209542	0.000182687	0.00018746	0.00176006	0.00145966	0.00134751	0.000168232	0.00017354	0.795241	-0.385967	-0.610954	-1.79512	0.894867	-0.861396	-0.272191	-2.15252	-2.48434	-2.82246	-2.8874	-1.39733	-1.64136	-1.95463	-2.9344	-2.40346	-0.548504	-2.31567	0.00713456	0.350914
GAAGCGCAGGTAGATAACTA	SYPL2	Not Significant in Both and Not Common Essential	No	0.198237	0.0887546	0.243978	0.172146	0.415891	1.30501	0.000179524	0.000197408	0.241582	0.0534446	0.000183759	0.000184565	0.100728	0.198237	0.242882	0.11516	0.0470946	0.263641	0.000209542	0.000182687	0.00018746	0.000176006	0.000145966	0.000134751	0.000168232	0.00017354	1.16742	-3.13323	-2.94053	-0.235915	-0.220287	-3.1231	-2.96975	-0.615829	-3.06412	-2.79959	-2.40006	-3.17549	-3.22114	-2.93177	-2.44706	-3.18161	-1.5089	-2.90261	0.0129607	0.948734
CTTCAAGGTCATGCTAGTGG	REM2	Not Significant in Both and Not Common Essential	No	0.601792	0.382328	1.18262	0.713178	1.09914	0.936538	0.233382	0.134237	0.617376	1.38956	0.00367518	0.0221479	0.319331	0.601792	0.201336	0.314356	0.104281	0.379768	0.000209542	0.000182687	0.00018746	0.00176006	0.000145966	0.000134751	0.000168232	0.00017354	0.389089	-0.704778	-0.725326	-0.250503	0.560441	-2.50757	-1.50787	-0.536812	-2.98265	-3.23571	-2.7453	-2.33399	-3.13967	-3.36789	-2.7923	-3.34012	-0.660415	-2.9922	0.0195131	0.170009
CGATACCGTGACCTAGCAGG	FCHSD1	Not Significant in Both and Not Common Essential	No	0.328508	0.180923	0.308361	1.20151	0.47159	0.447432	0.00179524	1.42726	0.512446	0.378388	0.00367518	2.04683	0.24432	0.328508	0.134224	0.130722	0.578591	0.244809	0.000209542	0.000182687	0.00018746	0.000176006	0.000145966	0.00134751	0.00168232	0.00017354	0.393233	-2.23494	0.0747757	0.0360835	0.320444	-1.92378	0.231354	-0.285606	-2.80656	-2.85464	-3.48946	-3.1433	-2.96358	-1.98682	-2.53646	-3.14943	-0.423554	-2.86628	0.0266009	0.676991
TTGCCAAGTATGCTCCCGTG	KDM5D	Not Significant in Both and Not Common Essential	No	0.315764	0.221887	0.50151	0.783442	0.542143	0.0328994	0.00179524	0.74028	0.292826	0.000213778	0.000183759	0.487253	0.139305	0.315764	0.182161	0.0933731	0.185014	0.0847416	0.000209542	0.000182687	0.00018746	0.000176006	0.000145966	0.000134751	0.000168232	0.00017354	-0.828944	-2.44616	-0.0246108	-0.267504	-3.01617	-3.43603	-0.206252	-0.590147	-2.93918	-2.70851	-2.9943	-2.68257	-3.0962	-2.84069	-3.0413	-2.6887	-1.35198	-2.87393	0.0145168	0.0868938
CTTGGGCCCAGACCGGCACG	SNAI3	Not Significant in Both and Not Common Essential	No	0.222309	0.139959	0.975912	0.270516	0.196805	0.0482525	1.15434	0.00197408	0.0366033	0.0213778	0.429995	0.000184565	0.000214316	0.222309	0.115049	0.0933731	0.605502	0.144375	0.000209542	0.000182687	0.00018746	0.000176006	0.000145966	0.000134751	0.000168232	0.00017354	-0.462481	0.0729231	-2.13683	-0.730516	-0.816038	-0.355947	-3.16604	-2.96298	-2.73961	-2.70851	-3.50921	-2.91396	-2.89663	-2.84069	-3.55621	-2.92009	-1.31974	-3.01061	0.0677355	0.496777
CAGGGCAAGTCCGAAGGTGA	TCEAL6	Not Significant in Both and Not Common Essential	No	0.615952	0.310641	0.81326	0.231871	0.738948	0.0021933	0.000179524	1.09561	1.46169	0.000213778	0.000183759	0.95974	1.70167	0.615952	0.920394	0.326806	0.0370029	0.116127	0.000209542	0.000182687	0.00018746	0.000176006	0.00145966	0.000134751	0.000168232	0.0017354	-2.15116	-3.65611	0.67441	0.296241	-3.1623	-3.64598	0.616907	0.362261	-3.6427	-3.25258	-2.29533	-2.81941	-2.79972	-3.38476	-2.34233	-1.82553	-1.33322	-2.79529	0.0695343	0.705058
GGTCTGGTTTCAAAACCGCA	VSX1	Not Significant in Both and Not Common Essential	No	0.335588	0.0443773	0.193149	0.129988	0.111399	0.00657989	5.04284	0.00197408	0.00244022	0.00213778	4.07577	0.00922827	0.0107158	0.335588	0.0543288	0.214758	0.279204	0.0690487	0.000209542	0.000182687	0.00374919	0.000176006	0.00145966	0.00134751	0.000168232	0.00017354	-0.828942	1.41678	-1.81854	-1.65945	-1.3172	1.32432	-1.14878	-1.01686	-2.41376	-3.07024	-1.87198	-2.59363	-1.57078	-2.20242	-3.22001	-2.59976	-0.631084	-2.44282	0.027668	0.233214
GCAGTGCCTATCACTACCGG	TTC28	Not Significant in Both and Not Common Essential	No	0.201069	0.167268	0.308361	0.24241	0.111399	0.537358	0.00897621	0.600121	0.0951686	0.26081	0.000183759	0.180874	0.00428632	0.201069	0.242882	0.236545	0.390212	0.0690487	0.000209542	0.000182687	0.00018746	0.000176006	0.000145966	0.000134751	0.000168232	0.00017354	0.506851	-1.53597	0.393688	-0.0683876	0.192911	-3.22481	-0.127174	-1.4148	-3.06412	-3.11221	-3.31839	-2.59363	-3.22114	-3.24438	-3.36539	-2.59976	-0.659711	-3.06488	0.0113195	0.958548
TCGGGGAGACATTAGTCACC	SRSF11	DepMap Common Essential	Yes	0.232221	0.085341	0.0372744	0.688586	0.048273	0.00021933	0.858126	0.199382	0.000244022	0.000213778	0.608241	0.0166109	0.000214316	0.232221	0.0990701	0.39528	0.0807336	0.295026	0.000209542	0.000182687	0.00018746	0.000176006	0.000145966	0.000134751	0.000168232	0.00017354	-2.59006	1.36214	-0.538272	-2.29628	-2.60119	1.21267	-1.61757	-2.35265	-2.67467	-3.3352	-2.63415	-3.22433	-2.83169	-3.46737	-2.68115	-3.23046	-1.17765	-3.00988	0.0206557	0.963876
TGTCTCCAAACATCATTTCA	TIPRL	Not Significant in Both and Not Common Essential	No	0.441786	0.139959	0.484567	0.25295	1.03601	0.153531	1.48287	0.00197408	0.480723	0.00213778	2.68655	0.00553696	0.615086	0.441786	0.111853	0.26767	0.652597	1.42178	0.000209542	0.000182687	0.00018746	0.000176006	0.000145966	0.000134751	0.00168232	0.0017354	0.0401952	0.485749	-2.10767	-0.333469	-1.81604	0.743841	-1.65976	-0.226428	-2.72738	-3.16589	-3.54174	-3.9073	-2.8844	-3.29807	-2.58874	-2.91343	-0.609198	-3.12837	0.0649734	0.588764
CCAGGGTGACTCACTGACGA	INSC	Not Significant in Both and Not Common Essential	No	0.284612	0.102409	0.176206	0.101883	0.0928327	0.00021933	0.166958	0.0098704	1.38605	0.000213778	0.000183759	0.000184565	0.115731	0.284612	0.0926785	0.143172	0.0302751	0.0125543	0.000209542	0.000182687	0.00018746	0.000176006	0.000145966	0.000134751	0.000168232	0.00017354	-2.66924	-0.0234135	-1.01377	1.17408	-2.68038	-2.98177	-2.74195	0.0957487	-2.64571	-2.89415	-2.20818	-1.85327	-2.80273	-3.02633	-2.25518	-1.85939	-1.35509	-2.44312	0.0826501	0.745658
CTGGGCTTCAAATACCCGGT	AQP1	Not Significant in Both and Not Common Essential	No	0.208149	0.116064	0.83698	0.0386451	0.724095	0.0153531	0.637311	0.0690928	0.239142	0.00641335	0.540251	0.00184565	0.169309	0.208149	0.067112	0.158734	0.333026	0.0690487	0.000209542	0.000182687	0.00018746	0.000176006	0.000145966	0.000134751	0.000168232	0.00017354	-0.878501	-0.118364	0.252338	-0.48114	-1.25761	-0.19012	-1.32095	-0.631116	-2.50553	-2.93896	-3.24957	-2.59363	-2.66255	-3.07114	-3.29657	-2.59976	-0.578182	-2.86471	0.02783	0.383624
ACTTCATTCGTTAGGAACCA	NUDT12	Not Significant in Both and Not Common Essential	No	0.44745	0.440359	0.670939	0.523466	0.159672	0.280742	0.000179524	0.732384	0.0122011	0.0983381	0.000183759	0.548159	0.000214316	0.44745	0.102266	0.0373492	0.158103	0.473925	0.000209542	0.000182687	0.00018746	0.000176006	0.000145966	0.000134751	0.000168232	0.00017354	-0.195499	-3.57256	0.14585	-1.11683	-0.651085	-3.56243	0.0200181	-2.87217	-2.68846	-2.31057	-2.92603	-3.43018	-2.84548	-2.44275	-2.97303	-3.43631	-1.47559	-2.8816	0.054822	0.0955632
GCGCTACCGGAGCGTACGCG	RPP25	Not Significant in Both and Not Common Essential	No	0.247797	0.03755	0.0609945	0.33024	0.0668396	0.00021933	0.00179524	0.584328	0.54905	0.000213778	0.000183759	0.047987	0.486497	0.247797	0.124637	0.164959	0.0437307	0.819169	0.000209542	0.000182687	0.00018746	0.000176006	0.000145966	0.000134751	0.000168232	0.00017354	-2.23351	-1.53117	0.247827	0.914578	-2.24465	-2.52104	-0.837706	0.862046	-2.77438	-2.95567	-2.36788	-3.66785	-2.9314	-3.08784	-2.41488	-3.67397	-0.917953	-2.98423	0.113828	0.60895
GGTCTATGCACTCAAGCACG	RYR2	Not Significant in Both and Not Common Essential	No	0.191157	0.669073	0.179595	0.0316187	0.0334198	0.429886	0.000179524	0.876492	0.000244022	0.162472	0.000183759	0.197485	0.000214316	0.191157	0.389889	0.189859	0.0100917	0.0784645	0.000209542	0.000182687	0.00018746	0.000176006	0.000145966	0.000134751	0.000168232	0.00017354	-0.19212	-3.00017	1.4428	-2.13657	-0.614695	-2.99005	0.79559	-2.19295	-3.26967	-3.01672	-1.73106	-2.64915	-3.42669	-3.1489	-1.77806	-2.65527	-1.11102	-2.70944	0.0561785	0.939049
GCTGGGTCCACAGCTCCCGT	C22orf34	Not Significant in Both and Not Common Essential	No	0.192573	0.392569	0.121989	0.207278	0.211659	0.620703	0.000179524	0.756073	0.00244022	0.0171023	0.000183759	0.269466	0.000214316	0.192573	0.271644	0.227208	0.208562	0.514727	0.000209542	0.000182687	0.00018746	0.000176006	0.000145966	0.000134751	0.000168232	0.00017354	0.198968	-2.8322	0.562011	-1.93821	-1.36086	-2.82207	0.113951	-2.99458	-3.11273	-3.09472	-3.04633	-3.46605	-3.26975	-3.22689	-3.09333	-3.47218	-1.38412	-3.22275	0.00892212	0.890216
TCAGATTTCATTCAAGACAG	SPAG7	Not Significant in Both and Not Common Essential	No	0.2747	0.406223	0.0881031	0.158094	0.0705529	1.66691	0.000179524	0.000197408	0.88824	0.632784	0.000183759	0.000184565	0.306472	0.2747	0.0287623	0.280119	0.25902	1.62578	0.000209542	0.000182687	0.00018746	0.000176006	0.000145966	0.000134751	0.00168232	0.00017354	0.613148	-2.69087	-2.90355	1.10002	0.192491	-2.68074	-2.93277	0.637876	-2.13755	-3.18563	-3.14042	-3.96553	-2.29457	-3.31781	-2.18742	-3.97166	-1.08305	-3.02508	0.160669	0.31528
AATTGTGGTCACATATCGGA	TAF9	Not Significant in Both and Not Common Essential	No	0.307268	0.133132	0.50151	0.00351319	0.0779795	0.00021933	0.908393	0.00197408	0.000244022	0.000213778	0.753411	0.000184565	0.000214316	0.307268	0.115049	0.0778109	0.0571863	0.0282472	0.000209542	0.000182687	0.00018746	0.000176006	0.000145966	0.000134751	0.000168232	0.00017354	-2.78318	0.257994	-0.250337	-2.50455	-2.79432	0.176752	-1.27955	-2.56093	-2.73961	-2.62933	-2.48438	-2.20545	-2.89663	-2.76151	-2.53138	-2.21158	-1.46727	-2.55748	0.077847	0.983653
TCCTACAAAGCGCCCTGTCG	RNF166	Not Significant in Both and Not Common Essential	No	0.199653	0.0921683	0.159263	0.857219	0.137392	5.3341	0.00359049	0.742254	0.00244022	8.82264	0.00183759	1.31041	0.0514358	0.199653	0.501742	0.136947	0.0605502	0.0345244	0.000209542	0.00182687	0.0018746	0.00176006	0.00291933	0.00134751	0.00336465	0.00017354	1.76248	-1.64696	-0.0625392	-1.75053	1.98102	-1.93787	0.184315	-0.426696	-3.37921	-1.87484	-1.50921	-1.2926	-2.2352	-2.00702	-1.25518	-2.29873	-0.237098	-1.9815	0.0922841	0.178271
CAGGTGTATCGTCAGTACGT	RIT1	Not Significant in Both and Not Common Essential	No	0.134518	0.559837	0.1186	0.288082	0.0891194	0.0943118	1.10946	0.000197408	0.124451	0.000213778	0.257262	0.000184565	0.0771537	0.134518	0.0703078	0.0840358	0.211926	0.02197	0.000209542	0.000182687	0.00018746	0.000176006	0.000145966	0.000134751	0.000168232	0.00017354	-0.773496	0.971027	-3.16415	0.145026	-3.4181	0.336291	-3.19337	-0.0626155	-2.52573	-2.66276	-3.05328	-2.0963	-2.68275	-2.79493	-3.10028	-2.10243	-1.14492	-2.62731	0.0318691	0.85296
TCAACAACGCGGGTGTGATG	RDH13	Not Significant in Both and Not Common Essential	No	0.784454	1.52931	1.22667	1.04693	1.12885	3.95451	1.33027	0.471805	0.492925	4.77153	0.668882	0.0719805	0.152164	0.784454	0.389889	0.398392	1.55749	0.304442	0.00419084	0.00182687	0.00018746	0.000176006	0.00145966	0.000134751	0.000168232	0.0017354	0.412597	0.0352121	-0.346155	-0.359855	0.494162	-0.263378	-1.1627	-0.870324	-1.96864	-2.3386	-3.91952	-3.23798	-2.42669	-3.47078	-3.96652	-2.2441	-0.257556	-2.9466	0.0422314	0.613851
GCGATGCGCATAGATGCACT	ATHL1	Not Significant in Both and Not Common Essential	No	0.315764	0.191164	0.135543	0.196739	2.04975	0.00021933	0.000179524	2.23861	1.87897	0.000213778	0.00183759	0.668127	0.906556	0.315764	0.159791	0.0933731	0.164831	0.106712	0.000209542	0.000182687	0.00018746	0.00352011	0.000145966	0.000134751	0.000168232	0.00017354	-2.94031	-2.87795	1.05609	-0.037781	-2.95144	-1.86783	0.530969	-0.354306	-2.88228	-2.70851	-2.94413	-1.48166	-3.0393	-2.84069	-2.99113	-2.78881	-1.18032	-2.70956	0.0132763	0.789966
GTATGCCCATTACTTCCTAG	CCNJL	Not Significant in Both and Not Common Essential	No	0.46161	0.385741	0.0745488	0.0491847	0.0148532	0.0021933	0.840174	0.00592224	0.000244022	0.000213778	0.801188	0.00369131	0.000214316	0.46161	0.169378	0.108935	0.141284	0.0125543	0.000209542	0.000182687	0.00018746	0.000176006	0.000145966	0.000134751	0.000168232	0.00017354	-2.2452	1.05193	-0.919344	-1.78439	-3.25633	1.03129	-1.12465	-1.84077	-2.90759	-2.77546	-2.87718	-1.85327	-3.06461	-2.90764	-2.92418	-1.85939	-1.13593	-2.64616	0.0772081	0.954523
CAAAAGTGTCTGAAATCCCG	USP17L8	Not Significant in Both and Not Common Essential	No	0.259125	0.228714	0.650608	0.516439	0.0705529	0.182044	0.000179524	0.0414557	1.49097	0.0320668	0.000183759	0.000184565	1.35876	0.259125	0.0351539	0.11516	0.188378	0.182038	0.000209542	0.000182687	0.00018746	0.000176006	0.000145966	0.00134751	0.000168232	0.00017354	-0.0991164	-3.5592	-1.09543	1.32495	-0.853237	-3.54907	-3.44687	1.28463	-2.2247	-2.79959	-3.00212	-3.01463	-2.38172	-1.93177	-3.04912	-3.02076	-1.24917	-2.67805	0.0146881	0.866835
AACGCATCACCATTCTTCGA	PPP2CA	DepMap Common Essential	Yes	0.542321	0.505219	0.0914917	0.288082	0.337911	0.157917	0.00179524	0.000197408	0.932164	0.303565	0.000183759	0.000184565	0.255036	0.542321	0.0639162	1.08002	0.312843	0.106712	0.000209542	0.000182687	0.00018746	0.000176006	0.000145966	0.000134751	0.000168232	0.00017354	-0.505051	-1.70726	-3.16415	0.44069	-0.221228	-2.69713	-3.19337	-0.122201	-2.48434	-3.77172	-3.22242	-2.78269	-2.64136	-3.9039	-3.26942	-2.78881	-1.39621	-3.10808	0.0855893	0.313623
CTCGAACGTGTAGTCAGTCA	LPCAT1	Not Significant in Both and Not Common Essential	No	0.312932	0.11265	0.172818	1.04693	0.300778	0.00021933	0.000179524	1.17458	0.854077	0.00213778	0.00183759	1.11847	0.306472	0.312932	0.41226	0.454416	0.289295	0.134959	0.000209542	0.000182687	0.00018746	0.000176006	0.000145966	0.000134751	0.00168232	0.00017354	-2.71063	-2.98347	0.049965	0.453251	-1.72177	-1.97334	0.0287067	0.00814474	-3.2939	-3.39575	-3.18843	-2.88467	-3.45092	-3.52792	-2.23543	-2.8908	-1.10614	-3.10848	0.00449634	0.867588
CTTGAGCAGATCAAACCACT	VPS54	DepMap Common Essential	Yes	0.403555	0.74076	0.213481	0.319701	0.271072	0.447432	0.570887	0.00197408	3.43095	0.00855114	0.455722	0.00369131	2.07672	0.403555	0.476176	1.46907	0.548316	0.480202	0.000209542	0.000182687	0.0018746	0.00176006	0.000145966	0.00134751	0.000168232	0.00017354	-0.21895	0.427191	-2.20938	1.10233	-1.93765	0.329341	-1.93756	0.884293	-3.3565	-3.90533	-2.46612	-2.4359	-3.51352	-3.03751	-3.51312	-3.44202	-0.445049	-3.20875	0.0278265	0.311175
GGGCTGAGGTGGCTGACTGT	BSCL2	Not Significant in Both and Not Common Essential	No	0.254877	0.836342	0.250755	0.133501	0.141106	0.870739	0.0538573	0.000197408	0.000244022	0.664851	0.0514524	0.00184565	0.000214316	0.254877	0.437826	0.183634	0.0807336	0.100435	0.000209542	0.000182687	0.00018746	0.000176006	0.000145966	0.000134751	0.000168232	0.00017354	0.0175041	-0.668005	-2.83012	-2.76212	-0.0996596	-0.687844	-1.85934	-2.81849	-3.32003	-3.00225	-2.63415	-2.75636	-3.47705	-3.13442	-2.68115	-2.76249	-1.46351	-2.97099	0.0306672	0.528815
CGAAGACAGATATTGAGACT	FOSB	Not Significant in Both and Not Common Essential	No	0.353995	0.211646	0.50151	0.189712	0.204232	0.493492	0.0574478	2.16557	0.00244022	0.28005	0.000183759	1.973	0.00214316	0.353995	0.0639162	0.227208	0.33639	0.0564944	0.000209542	0.000182687	0.00018746	0.00176006	0.000145966	0.00134751	0.000168232	0.00017354	0.36767	-0.941006	1.05748	-1.92269	0.121626	-3.43603	1.01703	-1.97907	-2.48434	-3.09472	-3.25393	-1.50648	-2.64136	-2.22689	-3.30093	-2.51261	-0.714374	-2.62766	0.0317821	0.346109
GAAACAAGCCAACGACCTGG	MYO1F	Not Significant in Both and Not Common Essential	No	0.182662	0.143373	0.115212	0.0808034	0.159672	0.00021933	1.64444	0.00197408	0.000244022	0.000213778	1.79349	0.00184565	0.000214316	0.182662	0.127832	0.233433	0.289295	0.0690487	0.000209542	0.000182687	0.00018746	0.000176006	0.000145966	0.000134751	0.00168232	0.00017354	-2.81537	1.15452	-1.61206	-2.8158	-2.8265	1.1922	-1.64128	-2.87217	-2.78537	-3.10645	-3.18843	-2.59363	-2.94239	-3.23863	-2.23543	-2.59976	-1.52956	-2.83626	0.00957056	0.331757
CCCGCAGCGACTCTACACCG	FGF22	Not Significant in Both and Not Common Essential	No	0.233637	0.160441	0.0881031	0.449689	0.0779795	0.175464	0.481125	0.073041	0.00244022	0.000213778	0.806701	0.095974	0.000214316	0.233637	0.194944	0.389055	0.0067278	0.0282472	0.000209542	0.000182687	0.00018746	0.000176006	0.000145966	0.000134751	0.000168232	0.00017354	0.0388727	0.737267	-0.789346	-1.50455	-2.87535	0.961721	-0.670759	-2.56093	-2.96864	-3.3283	-1.55496	-2.20545	-3.12566	-3.46048	-1.60196	-2.21158	-0.832884	-2.55713	0.0730562	0.984663
AGATGCACCCTTAGGTACAG	GAST	Not Significant in Both and Not Common Essential	No	0.410635	0.235541	0.569282	0.853706	0.115113	0.19959	0.587044	0.130289	0.000244022	0.367699	0.277476	0.0719805	0.000214316	0.410635	0.127832	0.124497	0.164831	0.0941573	0.000209542	0.000182687	0.00018746	0.000176006	0.000145966	0.000134751	0.000168232	0.00017354	-0.0719277	0.0133432	-0.816401	-2.6737	0.193426	-0.312102	-1.07409	-2.73007	-2.78537	-2.83345	-2.94413	-2.72833	-2.94239	-2.96563	-2.99113	-2.73445	-0.93394	-2.86561	0.0330639	0.163619
TTGCCAAGATAACTGGACGG	PTPRD	Not Significant in Both and Not Common Essential	No	0.361075	0.218473	0.599779	0.0562111	0.727809	0.142564	1.1328	0.667239	0.690582	0.00641335	1.16871	0.961586	0.660093	0.361075	0.0191749	0.420179	0.31957	0.420569	0.000209542	0.00182687	0.00018746	0.000176006	0.000145966	0.000134751	0.000168232	0.0017354	-0.185388	0.276162	1.07446	-0.0228022	-1.53231	0.289716	1.23317	-0.0424123	-1.96146	-2.36173	-3.23166	-3.37831	-2.11848	-3.4939	-3.27866	-2.38444	0.136323	-2.77608	0.0146531	0.168315
CATCCACGTGACCAGAGATG	SPATA19	Not Significant in Both and Not Common Essential	No	0.549401	0.631523	0.806482	0.793981	0.319345	0.256616	1.94784	0.000197408	0.000244022	0.0684091	2.69942	0.00553696	0.000214316	0.549401	0.0351539	0.367268	0.306115	0.326412	0.000209542	0.000182687	0.00018746	0.000176006	0.00145966	0.000134751	0.00168232	0.00017354	-0.391105	0.382959	-3.60445	-3.11683	-0.965275	0.524676	-2.15654	-3.17321	-2.2247	-3.30328	-3.21298	-3.26824	-1.38172	-3.43545	-2.25998	-3.27437	-1.56247	-2.79509	0.0185592	0.99571
TGGACTGGAAAACTCACACC	TACC3	DepMap Common Essential	Yes	0.707991	0.344778	0.450681	0.846679	0.475304	0.111858	0.236972	0.0098704	0.566131	0.408317	0.0367517	0.000184565	0.259322	0.707991	0.495351	0.252107	0.255656	0.238532	0.000209542	0.000182687	0.00018746	0.000176006	0.000145966	0.000134751	0.000168232	0.00017354	-0.488872	-0.279172	-1.93338	0.0759455	0.0734579	-1.08859	-3.66157	-0.263132	-3.37364	-3.13988	-3.13475	-3.13202	-3.53066	-3.27205	-3.18175	-3.13815	-0.945665	-3.23786	0.0136945	0.0137051
GCACATCACCACAAACACGC	SPPL2B	Not Significant in Both and Not Common Essential	No	0.246381	0.0819273	0.0508287	0.0597243	0.0371331	0.960664	0.000179524	0.000197408	0.000244022	0.666989	0.000183759	0.000184565	0.000214316	0.246381	0.0415455	0.00311244	0.0201834	0.0188315	0.000209542	0.000182687	0.00018746	0.000176006	0.000145966	0.000134751	0.000168232	0.00017354	1.06914	-2.45199	-2.48079	-2.18233	0.91069	-2.44186	-2.51	-2.23871	-2.29725	-1.23139	-2.03209	-2.02936	-2.45427	-1.36357	-2.07909	-2.03549	-1.54073	-1.94031	0.221489	0.46498
GTGCGGCTGTGTGTAGAAGC	STMN3	Not Significant in Both and Not Common Essential	No	0.402139	0.290159	0.640442	1.0399	0.215372	0.927764	0.658854	0.000197408	0.00244022	0.838012	0.74606	0.000184565	0.00214316	0.402139	0.43463	0.23032	0.1211	0.0753259	0.000209542	0.000182687	0.00018746	0.000176006	0.00145966	0.000134751	0.000168232	0.00017354	0.504801	0.0123094	-3.72163	-1.94576	0.460614	0.066294	-3.75084	-2.00213	-3.31685	-3.10062	-2.81024	-2.63142	-2.47387	-3.2328	-2.85724	-2.63754	-1.29704	-2.88257	0.0251732	0.583002
AGAACTAGCAGGCCTTACGG	STRN	Not Significant in Both and Not Common Essential	No	0.249213	0.0682728	0.257532	0.133501	0.0556996	0.00438659	0.000179524	1.62072	0.021962	0.00213778	0.000183759	2.12988	0.0664379	0.249213	0.172574	0.152509	0.0807336	0.0784645	0.00209542	0.000182687	0.00018746	0.000176006	0.000145966	0.000134751	0.000168232	0.00017354	-1.19212	-3.15671	1.08422	-0.40418	-1.50428	-3.14658	1.20287	0.0765638	-1.9157	-2.92159	-2.63415	-2.64915	-3.07272	-3.05376	-2.68115	-2.65527	-0.880027	-2.69794	0.0100223	0.325795
ACCTGCCATACGAAGCATCA	WBP11	DepMap Common Essential	Yes	0.696663	0.191164	1.06063	0.33024	0.356478	0.00021933	0.895826	1.0127	0.000244022	0.000213778	1.01619	0.476179	0.000214316	0.696663	0.361127	0.39528	0.232109	0.185176	0.000209542	0.000182687	0.00018746	0.000176006	0.000145966	0.000134751	0.00168232	0.00017354	-2.94031	-0.0733402	0.486651	-3.1646	-2.95144	-0.018589	0.158941	-3.22098	-3.23639	-3.3352	-3.09278	-3.02206	-3.39341	-3.46737	-2.13978	-3.02819	-1.46546	-3.0894	0.0140145	0.670115
CGCAAGGTGAAAAGACTGCG	C11orf88	Not Significant in Both and Not Common Essential	No	0.552233	0.307228	0.796317	0.864245	1.05087	0.0021933	2.1902	0.0296112	0.524647	0.00641335	3.70274	0.00369131	0.150021	0.552233	0.217315	0.295682	1.76605	0.938435	0.000209542	0.000182687	0.0018746	0.000176006	0.000145966	0.00269502	0.000168232	0.00017354	-2.14636	0.439398	-1.46518	-0.301682	-1.68038	0.667437	-2.36946	-0.845397	-3.01582	-3.20912	-2.97409	-3.72688	-3.17284	-2.04026	-4.02109	-3.733	-0.962702	-3.23664	0.0560647	0.830061
GTCATTGCTGGTACCCACAA	RTP5	Not Significant in Both and Not Common Essential	No	0.301604	0.174096	0.599779	0.140528	0.0928327	0.0131598	4.51144	0.00592224	0.0634457	0.00641335	11.8763	0.00738262	0.0557221	0.301604	0.127832	0.0186746	0.669416	0.0847416	0.000209542	0.000182687	0.00562379	0.00176006	0.00145966	0.00134751	0.00336465	0.00017354	-1.12154	0.876324	-1.37528	-0.165299	-1.4337	1.29669	-1.27955	-0.221674	-2.78537	-2.00954	-2.07567	-1.68257	-1.94239	-1.14172	-2.29876	-2.6887	-0.428004	-2.07809	0.110974	0.27041
AGAATTTCCGGCCTTCATGG	DNAJB8	Not Significant in Both and Not Common Essential	No	0.472938	0.785137	0.562505	1.0645	0.349051	0.587803	1.98374	0.15003	0.431919	0.517344	1.49212	0.00738262	0.0428632	0.472938	0.370714	0.308131	0.464218	0.354659	0.000209542	0.000182687	0.00018746	0.000176006	0.000145966	0.000134751	0.00168232	0.0017354	-0.125714	0.547358	-0.850968	0.0925134	-0.181166	0.423677	-2.15894	-0.910804	-3.24777	-3.22703	-3.39381	-3.30428	-3.40479	-3.3592	-2.44081	-2.31041	-0.395505	-3.08601	0.00025438	0.986738
CCTATCACCTCTCCAAAATG	PDPR	Not Significant in Both and Not Common Essential	No	0.361075	0.146786	0.399853	0.34078	0.0816928	0.0021933	0.342891	0.132263	0.33431	0.00213778	0.705634	0.0719805	0.0214316	0.361075	0.210924	0.11516	0.117736	0.0345244	0.000209542	0.000182687	0.00018746	0.000176006	0.000145966	0.000134751	0.000168232	0.00017354	-1.82559	-0.0667443	-0.411036	0.611966	-1.83672	0.246679	-0.675259	-0.581129	-3.00285	-2.79959	-2.798	-2.2926	-3.15987	-2.93177	-2.845	-2.29873	-0.567229	-2.76605	0.0397056	0.562309
CCAGCAAGATGATGCCCAAG	CXCL9	Not Significant in Both and Not Common Essential	No	0.235053	0.109236	0.0169429	0.0632375	0.341624	0.675535	0.000179524	0.596172	0.578332	0.929936	0.000183759	0.26762	0.334333	0.235053	0.0287623	0.0342368	0.00033639	0.00627716	0.000209542	0.000182687	0.00018746	0.000176006	0.000145966	0.000134751	0.00168232	0.00017354	0.791282	-1.97487	0.974397	0.228629	0.930087	-1.96474	0.626544	-0.00936913	-2.13755	-2.27279	-0.253934	-1.55224	-2.29457	-2.40496	0.699066	-1.55836	-0.0497543	-1.47192	0.240683	0.0670217
AGGAAAGTAATCAGTTATCG	OR2B6	Not Significant in Both and Not Common Essential	No	0.266204	0.256023	0.562505	0.530492	0.349051	1.0813	1.71087	0.000197408	0.653979	1.32756	1.5399	0.00369131	0.852977	0.266204	0.722253	0.118273	0.141284	0.15379	0.00209542	0.000182687	0.00018746	0.000176006	0.00145966	0.000134751	0.000168232	0.0017354	0.625667	0.483091	-3.42931	0.272675	0.714775	0.437366	-2.1575	0.388048	-2.53742	-2.81118	-2.87718	-2.9414	-2.69444	-2.94335	-2.92418	-1.94753	-0.333149	-2.70959	0.0692457	0.0677887
ATGGAATCACAGTTGTACTG	EREG	Not Significant in Both and Not Common Essential	No	0.489929	0.146786	0.159263	0.432123	0.133679	0.460592	0.00538573	0.639602	0.000244022	0.0320668	0.000183759	0.470642	0.000214316	0.489929	0.504938	0.725198	0.151375	0.081603	0.000209542	0.000182687	0.00018746	0.000176006	0.000145966	0.000134751	0.000168232	0.00017354	0.496632	-1.47087	0.170302	-2.73863	-0.660629	-2.93787	0.0370833	-2.79501	-3.38197	-3.59875	-2.90715	-2.66618	-3.53899	-3.73092	-2.95415	-2.67231	-1.23737	-3.1813	0.0312019	0.576567
ATACACCCAGACAAATGTTG	POU1F1	Not Significant in Both and Not Common Essential	No	0.412051	0.0238955	0.0881031	0.389964	0.096546	0.0021933	0.931731	2.59986	0.00244022	0.000213778	0.854478	4.25608	0.000214316	0.412051	0.0735037	0.105823	0.0033639	0.125543	0.000209542	0.00182687	0.00018746	0.000176006	0.00145966	0.000134751	0.00168232	0.0017354	-1.03722	1.0243	0.823925	-1.59731	-2.04835	0.98671	1.03799	-2.65368	-2.54504	-1.76287	-1.25393	-2.85327	-1.70206	-2.89505	-0.300934	-1.85939	-0.432955	-1.89657	0.11087	0.158186
GCCCTACTCACACTTAATCA	CLEC17A	Not Significant in Both and Not Common Essential	No	0.3101	0.218473	0.647219	0.375912	0.0779795	0.00021933	0.000179524	0.286242	0.185457	0.000213778	0.000183759	0.234398	0.900126	0.3101	0.0479372	0.295682	0.144648	0.188315	0.000209542	0.000182687	0.00018746	0.000176006	0.000145966	0.000134751	0.000168232	0.00017354	-2.9983	-3.55693	-0.118353	0.376263	-3.00943	-3.5468	-0.205132	1.06232	-2.3594	-3.20912	-2.8874	-3.02936	-2.51642	-3.34129	-2.9344	-3.03549	-1.49955	-2.91411	0.015566	0.403796
CAATTGGATAGAGGGTACCC	PVRL1	Not Significant in Both and Not Common Essential	No	0.344083	0.334537	0.782762	0.140528	0.252505	0.00021933	0.000179524	1.10549	0.000244022	0.000213778	0.000183759	0.498327	0.000214316	0.344083	0.287623	0.224095	0.420487	0.169483	0.000209542	0.000182687	0.00018746	0.000176006	0.000145966	0.000134751	0.000168232	0.00017354	-3.18335	-3.63951	0.895792	-3.01484	-3.19448	-3.62938	0.549752	-3.07122	-3.13755	-3.08872	-3.35084	-2.9836	-3.29457	-3.2209	-3.39784	-2.98973	-2.2859	-3.18297	0.0027944	0.364874
CAGCGACGCCTTGCTAACAA	CARD8	Not Significant in Both and Not Common Essential	No	0.502673	1.29377	0.606556	0.484821	0.152246	0.333381	1.80781	1.16076	0.000244022	0.378388	1.26426	3.68023	0.00214316	0.502673	0.13742	0.809234	0.0033639	0.163206	0.000209542	0.00365373	0.00018746	0.000176006	0.000145966	0.00269502	0.000168232	0.00017354	-0.588916	0.474282	0.379161	-2.79512	-0.53392	0.318965	0.880294	-1.85149	-2.81678	-2.34534	-1.25393	-2.96721	-2.9738	-2.47751	-1.30093	-2.97334	-0.464593	-2.38861	0.0931095	0.348014
CTGTCGTAGTGATACCGTAA	HMCES	Not Significant in Both and Not Common Essential	No	0.655599	0.686141	0.176206	0.161607	1.46304	0.00657989	0.00179524	0.000197408	1.52026	0.000213778	0.00183759	0.00184565	1.88598	0.655599	0.514526	0.239658	0.366665	0.10985	0.000209542	0.000182687	0.00018746	0.000176006	0.000145966	0.000134751	0.000168232	0.0017354	-2.01819	-1.9919	-2.9131	0.0166617	-3.50645	-1.98177	-1.94231	0.110281	-3.39014	-3.11788	-3.29136	-2.79527	-3.54716	-3.25006	-3.33836	-1.8014	-1.77835	-3.06645	0.0175548	0.594874
GTGACACATACTGATACCCA	MYBL1	Significant in Both and Not Common Essential	No	0.372403	0.249196	0.562505	0.874785	0.523577	0.217136	0.00179524	0.365205	0.273305	0.11544	0.00183759	0.346983	0.278611	0.372403	0.19814	0.118273	0.144648	0.257363	0.000209542	0.000182687	0.00018746	0.000176006	0.000145966	0.000134751	0.000168232	0.00017354	-0.0598092	-2.496	-0.379365	-0.282333	-0.334185	-2.48588	-0.401593	-0.273982	-2.9757	-2.81118	-2.8874	-3.16502	-3.13272	-2.94335	-2.9344	-3.17115	-0.839144	-3.00262	0.00859648	0.03617
CTTGCGGTCAATGGGACAGT	HSD17B3	Not Significant in Both and Not Common Essential	No	0.380899	0.170682	0.0779374	0.404017	0.222799	0.00657989	0.116691	0.750151	0.234261	0.000213778	0.000183759	0.143961	0.347192	0.380899	0.319581	0.220983	0.117736	0.677933	0.000209542	0.000182687	0.00018746	0.000176006	0.000145966	0.000134751	0.000168232	0.00017354	-1.41397	0.175291	0.268749	0.0217868	-2.90222	-2.6275	-0.448155	0.192656	-3.18331	-3.08265	-2.798	-3.58566	-3.34033	-3.21483	-2.845	-3.59179	-0.84167	-3.2052	0.0223519	0.647842
GGAAGGTGTACAGTTCAGAA	FBXO24	Not Significant in Both and Not Common Essential	No	0.222309	0.259437	0.328692	0.196739	0.412177	0.00021933	0.576273	0.000197408	1.71548	0.000213778	0.000183759	0.00184565	2.89326	0.222309	0.17577	0.143172	0.0033639	2.1562	0.000209542	0.000182687	0.00018746	0.00176006	0.000145966	0.000134751	0.00168232	0.00017354	-3.07293	0.243839	-2.99853	0.619302	-3.08407	-3.25254	-2.02774	0.846304	-2.92367	-2.89415	-1.25393	-3.08816	-3.08069	-3.02633	-0.300934	-4.09429	-1.5908	-2.58277	0.254228	0.376373
CCTTGTGATAAACCTCCGGT	AMDHD2	Not Significant in Both and Not Common Essential	No	0.784454	0.59056	0.193149	0.843166	0.118826	0.888285	0.00179524	0.0375075	0.251343	0.371975	0.000183759	0.00922827	0.0364337	0.784454	0.147007	0.410842	0.134556	0.511588	0.000209542	0.000182687	0.00018746	0.000176006	0.000145966	0.000134751	0.000168232	0.00017354	0.177288	-2.03177	-1.35179	0.325355	-0.20075	-3.02164	-1.96079	-0.513408	-2.84607	-3.35197	-2.85599	-3.46339	-3.00309	-3.48414	-2.90299	-3.46952	-1.07219	-3.17215	0.0306694	0.136263
AGCAGTAGGGAGGGTACACA	C9orf84	Not Significant in Both and Not Common Essential	No	0.346915	0.3004	0.633665	0.091343	0.211659	0.208363	0.0161572	1.63454	0.00976088	0.111165	0.00735035	1.79028	0.000214316	0.346915	0.0415455	0.532227	0.0706419	0.00313858	0.00209542	0.000182687	0.00018746	0.000176006	0.000145966	0.000134751	0.000168232	0.00017354	-0.158879	-1.59349	1.25272	-1.33615	-0.431732	-1.93555	1.29225	-2.99458	-1.29725	-3.46439	-2.57615	-1.25121	-2.45427	-3.59656	-2.62315	-1.25733	-0.738178	-2.31504	0.126487	0.601864
ACTTTATGACGCACTCACTG	PPIL6	Significant in Both and Not Common Essential	No	0.758966	0.395982	0.576059	0.288082	0.594129	0.451819	0.166958	0.319801	0.00244022	0.513068	0.00183759	0.118122	0.0192884	0.758966	0.466588	0.301906	0.134556	0.426847	0.000209542	0.000182687	0.00018746	0.000176006	0.000145966	0.000134751	0.000168232	0.00017354	0.057289	-0.53786	0.0453637	-2.38645	0.112499	-2.49622	-0.387185	-1.48858	-3.34766	-3.21816	-2.85599	-3.38474	-3.50468	-3.35034	-2.90299	-3.39087	-0.885143	-3.24443	0.0154607	0.0154227
TGTGTGCAATACTCCTCACG	NDUFA5	Not Significant in Both and Not Common Essential	No	0.329924	0.70321	0.762431	0.203765	0.46045	1.91913	0.100534	0.179641	1.25183	1.49859	0.000183759	0.101511	0.471495	0.329924	0.556071	0.186746	0.131192	0.665379	0.00209542	0.000182687	0.00018746	0.000176006	0.000145966	0.000134751	0.00168232	0.00017354	0.436019	-0.879888	-0.0547241	0.434363	0.328598	-3.61795	-0.302616	0.0102946	-2.42386	-3.00954	-2.845	-3.57754	-3.58088	-3.14172	-1.892	-3.58367	-0.455738	-3.00678	0.022589	0.506031
GAGAGTGGATGGGACTCAGG	IFI27L1	Not Significant in Both and Not Common Essential	No	0.213813	0.638351	0.0203315	0.372398	0.181952	1.87966	0.00179524	0.132263	1.38849	1.37246	0.000183759	0.04245	0.632232	0.213813	0.0447414	0.351705	0.0403668	0.0345244	0.000209542	0.000182687	0.00018746	0.00352011	0.000145966	0.000134751	0.000168232	0.00017354	0.46902	-1.05405	-0.449569	0.882586	0.33244	-2.04392	-0.94313	0.54092	-2.32944	-3.28447	-2.33312	-0.99157	-2.48646	-3.41665	-2.38012	-2.29873	-0.283213	-2.44007	0.0976945	0.203661
ACCTCAGGTCAGGACTCCAG	ZNF416	Not Significant in Both and Not Common Essential	No	0.379483	0.167268	0.714991	0.91343	0.586703	0.776427	0.0556525	0.0454039	0.000244022	0.592166	0.0790163	0.0406044	0.000214316	0.379483	0.37391	0.364155	0.615594	0.244809	0.000209542	0.000182687	0.00018746	0.000176006	0.000145966	0.000134751	0.000168232	0.00017354	0.666688	-1.10882	-1.30358	-3.38099	0.549031	-0.956584	-1.3521	-3.43736	-3.2515	-3.29958	-3.51639	-3.1433	-3.40852	-3.43175	-3.56339	-3.14943	-1.29046	-3.34548	0.00280648	0.0654208
TTGGGAAGGACACCATTCCG	IL2RB	Not Significant in Both and Not Common Essential	No	0.291692	0.494978	0.260921	0.439149	0.226512	0.0021933	0.000179524	2.37877	0.00244022	0.00213778	0.00183759	2.60791	0.000214316	0.291692	0.0894827	0.130722	0.524768	0.765813	0.000209542	0.00182687	0.00018746	0.000176006	0.00145966	0.000134751	0.000168232	0.00017354	-2.35349	-3.16239	0.733741	-1.96766	-2.36462	-2.15226	0.773681	-3.02404	-2.63047	-1.85464	-3.44706	-3.6386	-1.78749	-2.98682	-3.49406	-3.64472	-1.68963	-2.93548	0.0470697	0.515059
GGTTCTTGACTATAGAGGCC	MS4A10	Not Significant in Both and Not Common Essential	No	0.353995	0.157027	0.528619	0.33024	0.230225	0.00021933	0.238767	0.221097	0.146413	0.00213778	0.916956	0.0461414	0.0150021	0.353995	0.150203	0.336143	0.659324	0.172622	0.000209542	0.000182687	0.00018746	0.000176006	0.000145966	0.000134751	0.000168232	0.00017354	-2.85488	-0.345168	-0.174247	-0.196573	-1.86601	0.239206	-0.854739	-1.186	-2.85541	-3.26482	-3.54619	-2.99157	-3.01243	-3.39699	-3.59319	-2.9977	-0.904801	-3.20729	0.0214183	0.35315
AGCATATTGATTACAGGATG	SNRPB	DepMap Common Essential	Yes	0.402139	0.583732	0.474401	0.361859	0.519863	0.00021933	1.09151	0.00197408	0.000244022	0.000213778	0.486961	0.000184565	0.000214316	0.402139	0.357931	0.236545	0.0201834	0.0972959	0.000209542	0.000182687	0.00018746	0.000176006	0.000145966	0.000134751	0.000168232	0.00017354	-3.42512	0.361882	-2.26317	-3.32846	-3.43625	0.0113486	-3.29239	-3.38483	-3.23253	-3.11221	-2.03209	-2.74257	-3.38955	-3.24438	-2.07909	-2.74869	-2.34462	-2.82264	0.0384755	0.101834
TCTCCCAGAAATTACCCCTG	C17orf99	Not Significant in Both and Not Common Essential	No	0.000141598	0.0170682	0.101657	0.249437	0.000371331	0.00021933	0.000179524	0.821218	0.000244022	0.000213778	0.000183759	0.756718	0.000214316	0.000141598	0.000319581	0.0435741	0.00033639	0.000313858	0.000209542	0.000182687	0.00018746	0.000176006	0.000145966	0.000134751	0.000168232	0.00017354	-1.89109	-2.75301	0.517498	-0.182332	-1.90222	-2.74289	0.481973	-0.238707	-0.18331	-2.37752	-0.253934	-0.251206	-0.340329	-2.5097	-0.300934	-0.257334	-1.08885	-0.809283	0.368702	0.393448
CGTGTCATTCAAGAGCCAGG	CSTB	Not Significant in Both and Not Common Essential	No	0.386563	0.447187	0.93186	0.207278	0.668396	1.02208	0.145415	0.126341	0.139093	0.0192401	0.0643156	0.04245	0.0171453	0.386563	0.108658	0.224095	0.0706419	0.514727	0.000209542	0.000182687	0.00018746	0.000176006	0.000145966	0.000134751	0.000168232	0.00017354	0.358996	-0.806741	-0.215009	-0.681729	-1.36628	-1.16103	-0.688676	-1.59089	-2.71479	-3.08872	-2.57615	-3.46605	-2.87181	-3.2209	-2.62315	-3.47218	-0.76892	-3.00422	0.0360036	0.0844341
CTACGCCCGCACGTTGCCAG	SLC35A2	Not Significant in Both and Not Common Essential	No	0.345499	0.0273091	0.155875	0.0632375	0.430744	0.00021933	1.17229	0.00197408	0.000244022	0.000213778	0.398756	0.00184565	0.000214316	0.345499	0.0383497	0.236545	0.168195	0.194592	0.000209542	0.000182687	0.00018746	0.000176006	0.000145966	0.000134751	0.000168232	0.00017354	-2.09521	0.876259	-1.50561	-3.24679	-2.10634	0.407931	-1.53483	-3.30316	-2.26249	-3.11221	-2.9529	-3.0436	-2.41951	-3.24438	-2.9999	-3.04973	-1.56347	-2.88559	0.016899	0.964876
CAGGCAGTCTTCATCCCCGT	CEL	Not Significant in Both and Not Common Essential	No	0.307268	0.296987	0.904751	0.523466	0.278498	0.00877319	9.02827	0.410609	0.0854077	0.00213778	4.83469	0.251009	0.00214316	0.307268	0.252469	0.286344	0.245565	0.207146	0.00209542	0.000182687	0.00374919	0.000176006	0.000145966	0.00134751	0.00336465	0.0017354	-1.52958	0.999075	-0.10546	-0.513325	-2.14277	0.72784	-0.319199	-2.11377	-2.08094	-3.19518	-1.81623	-3.07075	-3.23796	-2.32736	-1.86323	-2.07688	-0.624649	-2.45856	0.000116392	0.287795
CGCGCAGCGAGAGGTCGTTG	SIGLEC15	Not Significant in Both and Not Common Essential	No	0.300188	0.167268	0.0508287	0.396991	0.233938	0.00021933	0.0574478	2.80122	0.100049	0.000213778	0.00183759	2.13542	0.00642947	0.300188	0.108658	0.0840358	0.433943	0.081603	0.000209542	0.000182687	0.00018746	0.00176006	0.000145966	0.000134751	0.00168232	0.00017354	-2.88231	0.0531644	0.848567	-0.368888	-2.89345	-1.44186	0.730703	-1.56093	-2.71479	-2.66276	-3.36452	-1.66618	-2.87181	-2.79493	-2.41152	-2.67231	-0.939376	-2.64485	0.0470385	0.350196
TGCGACTACGTGATCGTGAG	CCDC130	Not Significant in Both and Not Common Essential	No	0.390811	0.402809	0.081326	0.519952	0.712955	0.394793	0.000179524	1.02455	0.209859	0.0513068	0.000183759	0.664436	0.600084	0.390811	0.0447414	0.292569	0.0706419	0.0784645	0.000209542	0.000182687	0.00018746	0.000176006	0.000145966	0.00134751	0.000168232	0.00017354	-0.00872972	-2.65611	0.29457	-0.531135	-0.894924	-2.64598	0.10649	-0.0748501	-2.32944	-3.20452	-2.57615	-2.64915	-2.48646	-2.3367	-2.62315	-2.65527	-0.801333	-2.60761	0.0662543	0.75518
GGTTGCATATGGCCACATAG	OR5K1	Not Significant in Both and Not Common Essential	No	0.233637	0.385741	0.159263	0.0702638	0.100259	5.00291	0.242358	0.00197408	0.0195218	5.57748	0.0551276	0.000184565	0.00642947	0.233637	0.115049	0.258332	0.067278	0.13182	0.000209542	0.000182687	0.00374919	0.00176006	0.000145966	0.000134751	0.00168232	0.0017354	1.11293	0.182342	-1.55137	-0.710604	1.16014	-0.460746	-2.58058	-1.19295	-2.73961	-3.15047	-1.25394	-1.87445	-2.89663	-3.28265	-1.60196	-1.88058	-0.505104	-2.33504	0.0117181	0.214781
TGTGGTAGGAGGACTATATG	KLHL41	Not Significant in Both and Not Common Essential	No	0.402139	0.55301	0.179595	0.534005	0.196805	0.469365	0.00179524	0.000197408	0.000244022	1.08813	0.000183759	0.000184565	0.00214316	0.402139	0.159791	0.74076	0.269112	0.825446	0.000209542	0.000182687	0.00018746	0.000176006	0.000145966	0.000134751	0.000168232	0.00017354	-0.0712223	-2.00017	-3.43218	-2.90661	0.293948	-2.99005	-3.4614	-1.96298	-2.88228	-3.60797	-3.15702	-3.67116	-3.0393	-3.74015	-3.20402	-3.67729	-2.06633	-3.3724	0.0213208	0.295115
AACTCTAAAAAAGAACCGAG	CASP2	Not Significant in Both and Not Common Essential	No	0.218061	0.0273091	0.57267	0.00351319	0.000371331	0.0021933	4.13624	0.00394816	0.000244022	0.0106889	6.94241	0.00922827	0.000214316	0.218061	0.0766995	0.049799	0.0100917	0.533558	0.000209542	0.000182687	0.00018746	0.000176006	0.00583865	0.00134751	0.00168232	0.00017354	-1.09521	0.858701	0.0506931	-0.182332	-0.407374	1.08361	0.419419	-0.238707	-2.56352	-2.43551	-1.73106	-3.48165	-1.11848	-1.56769	-0.778056	-3.48778	0.0610995	-2.14547	0.138837	0.237706
AAAAACGGTCCATTGGTAGG	KIF3B	Not Significant in Both and Not Common Essential	No	0.332756	0.0614455	0.138932	0.144041	0.137392	2.92366	0.0484715	1.96618	0.00976088	2.62734	0.196622	1.93055	0.000214316	0.332756	0.556071	0.532227	0.154739	0.0470787	0.00419084	0.00182687	0.00018746	0.000176006	0.000145966	0.000134751	0.000168232	0.0017354	1.67744	-0.457316	1.13514	-1.14847	1.63103	0.15083	1.12719	-2.80691	-2.12283	-2.46439	-2.91669	-2.4273	-3.58088	-3.59656	-2.96369	-1.43342	0.163616	-2.68822	0.0324636	0.05238
AAGGACCCGGGATTGCAAAA	CLYBL	Not Significant in Both and Not Common Essential	No	0.236469	0.215059	0.393076	0.137015	0.103973	1.85553	0.463173	0.00197408	0.77843	1.57555	0.769949	0.000184565	0.623659	0.236469	0.118245	0.0778109	0.470946	0.081603	0.00419084	0.000182687	0.00018746	0.000176006	0.000145966	0.000134751	0.000168232	0.00017354	0.93591	0.0712667	-1.8414	0.874299	0.864875	0.291985	-2.87062	0.778027	-1.45048	-2.62933	-3.40006	-2.66618	-2.90853	-2.76151	-3.44706	-2.67231	-0.111957	-2.74193	0.0573645	0.0568617
CATGGTGTGTGGGATACAAG	TRIML2	Not Significant in Both and Not Common Essential	No	0.46161	0.389155	0.14232	0.231871	0.94318	0.146951	0.0807859	0.000197408	0.66862	0.00213778	0.0973921	0.00184565	0.559364	0.46161	0.338756	0.192971	0.484402	0.436262	0.000209542	0.000182687	0.00018746	0.000176006	0.000145966	0.000134751	0.000168232	0.00017354	-0.42295	-0.24593	-3.06988	-0.149415	-2.26016	-0.164742	-2.0991	-0.2269	-3.20862	-3.02378	-3.4123	-3.39422	-3.36564	-3.15596	-3.4593	-3.40035	-1.07988	-3.30252	0.00203054	0.194784
TCTCCCTCAGTATTTAGACC	ALDH3A2	Not Significant in Both and Not Common Essential	No	0.000141598	0.000341364	0.325304	0.0562111	0.00371331	0.0021933	0.671421	0.000197408	0.000244022	0.000213778	0.880204	0.000184565	0.000214316	0.000141598	0.000319581	0.000311244	0.00033639	0.000313858	0.000209542	0.000182687	0.00018746	0.000176006	0.000145966	0.000134751	0.000168232	0.00017354	0.80788	0.314706	-2.45446	-1.18233	-0.203255	0.432294	-2.48367	-1.23871	-0.18331	-0.231393	-0.253934	-0.251206	-0.340329	-0.363569	-0.300934	-0.257334	-0.750943	-0.272751	0.0336772	0.43193
TTGCTCCTGCTGGAATACCA	GOLGA6B	Not Significant in Both and Not Common Essential	No	1.08889	0.409637	0.399853	1.07152	0.215372	0.00021933	0.000179524	0.667239	0.0317229	0.000213778	0.00183759	0.852692	0.000214316	1.08889	0.33556	0.208533	0.279204	0.210285	0.000209542	0.000182687	0.00018746	0.000176006	0.000145966	0.000134751	0.000168232	0.00017354	-3.2713	-3.34778	-0.205719	-0.831816	-3.28244	-2.33765	-0.0992081	-3.00213	-3.2045	-3.05747	-3.17301	-3.07728	-3.36152	-3.18964	-3.22001	-3.08341	-2.04726	-3.17086	0.064725	0.0836536
TCAAGCTGCACGCCAAACTG	ZFR2	Not Significant in Both and Not Common Essential	No	0.498425	0.675901	0.227035	0.122962	0.233938	1.67129	0.059243	0.000197408	0.0122011	1.39597	0.503499	0.00184565	0.0364337	0.498425	0.246077	0.211646	0.316207	0.241671	0.00209542	0.000182687	0.00018746	0.000176006	0.000145966	0.000134751	0.000168232	0.00017354	0.393169	-0.583456	-2.79441	-1.2827	0.314993	0.345906	-1.82362	-0.807597	-2.0698	-3.0639	-3.22706	-3.1377	-3.22682	-3.19608	-3.27406	-3.14382	-0.779714	-3.04241	0.00429834	0.690217
AAGGTGGAGATAACGCACTG	AGO2	Not Significant in Both and Not Common Essential	No	0.56356	0.532528	0.376133	0.179173	0.508723	1.09665	0.21902	0.544846	0.483164	0.549411	0.273801	0.47987	0.792968	0.56356	0.255665	0.283232	0.420487	0.480202	0.000209542	0.000182687	0.00018746	0.000176006	0.000145966	0.00269502	0.000168232	0.00017354	0.313726	-0.234858	0.483001	-0.0223868	0.0135549	-0.137906	0.427851	0.192774	-3.0864	-3.19043	-3.35084	-3.4359	-3.24342	-2.02158	-3.39784	-3.44202	0.12947	-3.14606	0.00236549	0.335404
AAGCAAACGGATCGTGCAAG	RNASE11	Not Significant in Both and Not Common Essential	No	0.393643	0.580319	0.172818	0.389964	0.0928327	0.364087	0.000179524	0.00197408	0.358712	0.468175	0.000183759	0.00184565	0.357907	0.393643	0.0607204	0.186746	1.32538	0.150652	0.000209542	0.000182687	0.00018746	0.000176006	0.000145966	0.000134751	0.000168232	0.00017354	-0.202462	-2.98347	-2.29566	0.587045	-0.0932586	-2.97334	-2.32488	0.586069	-2.46206	-3.00954	-3.84943	-2.93245	-2.61908	-3.14172	-3.89643	-2.93858	-1.21249	-3.10616	0.142139	0.277748
CCTTCTGATAAAAATCACAG	ZNF589	Not Significant in Both and Not Common Essential	No	0.414882	0.129718	0.345635	0.0983694	0.0779795	0.037286	0.640902	0.00394816	0.00488044	0.818771	1.89823	0.000184565	0.000214316	0.414882	0.239686	0.149397	0.487765	0.0313858	0.000209542	0.00182687	0.00018746	0.000176006	0.000145966	0.000134751	0.000168232	0.00017354	-0.541454	0.268174	-1.39647	-1.20352	0.800162	0.739731	-2.72671	-2.56093	-3.05837	-1.91263	-3.4153	-2.25121	-3.21539	-3.04481	-3.4623	-2.25733	-0.827626	-2.82717	0.0344865	0.420727
CAAACACAGTTCCTGCACCA	PYGL	Not Significant in Both and Not Common Essential	No	0.60604	0.955819	0.437127	0.288082	0.946894	5.86926	0.00359049	1.73324	0.261104	3.39694	0.00551276	1.68508	1.12944	0.60604	0.278036	0.329918	0.33639	0.451955	0.00419084	0.00182687	0.00018746	0.000176006	0.00291933	0.00134751	0.00168232	0.00017354	0.788208	-2.08545	0.779343	-0.559488	0.550712	-1.89924	0.767104	0.0765618	-1.8218	-2.2567	-3.25393	-3.40957	-1.97882	-2.38887	-2.30093	-3.4157	-0.197781	-2.60329	0.00245267	0.165293
ACTACTGTAGCATTATAAGG	QRSL1	Not Significant in Both and Not Common Essential	No	0.383731	0.153614	0.0914917	0.126475	0.267358	0.00021933	0.000179524	0.000197408	1.3592	0.000213778	0.000183759	0.000184565	0.190741	0.383731	0.338756	0.526002	0.238837	0.0910188	0.000209542	0.000182687	0.00018746	0.000176006	0.000145966	0.000134751	0.000168232	0.00017354	-2.84533	-2.70726	-2.80664	0.70619	-2.85647	-2.69713	-2.83586	-0.146649	-3.20862	-3.45928	-3.10519	-2.7136	-3.36564	-3.59146	-3.15219	-2.71973	-2.02364	-3.16446	0.0122697	0.953326
GCTATCAGAAAAGAAGTCGT	TRPC4	Not Significant in Both and Not Common Essential	No	0.494177	0.389155	0.159263	0.959102	0.167099	0.00021933	0.000179524	4.5009	0.000244022	0.00213778	0.00367518	3.36832	0.00214316	0.494177	0.284427	0.258332	0.309479	0.279333	0.00419084	0.00182687	0.00018746	0.000176006	0.000145966	0.000134751	0.000168232	0.00017354	-3.24902	-2.94799	0.671435	-2.83554	-2.26016	-1.63684	0.545549	-1.89192	-1.83167	-2.15047	-3.21772	-3.20059	-3.28972	-3.28265	-3.26472	-3.20672	-1.70056	-2.93053	0.00165963	0.434824
CTAGTCCTCAAGTACCGTAA	DNMBP	Not Significant in Both and Not Common Essential	No	0.365323	0.129718	1.05385	0.885324	0.159672	0.0021933	0.00359049	2.32942	0.000244022	0.00213778	0.000183759	1.06125	0.000214316	0.365323	0.178965	0.164959	0.0908253	0.229116	0.000209542	0.00182687	0.00018746	0.000176006	0.000145966	0.000134751	0.000168232	0.00017354	-1.7719	-2.46763	0.420146	-2.8158	-1.78304	-3.75853	0.0787155	-2.87217	-2.9315	-1.95567	-2.6853	-3.11453	-3.08852	-3.08784	-2.7323	-3.12066	-1.87128	-2.83954	0.0107799	0.797575
TCTGCTCTCACCTCTGGCGA	PF4V1	Not Significant in Both and Not Common Essential	No	0.244965	0.146786	0.647219	0.105396	0.278498	0.00438659	1.83833	0.000197408	0.180576	0.00213778	3.33155	0.00922827	0.00642947	0.244965	0.818128	0.404617	0.205198	0.0847416	0.00209542	0.000182687	0.00018746	0.000176006	0.000145966	0.000134751	0.00168232	0.00017354	-1.52456	0.453372	-2.72746	-0.188162	-1.83672	0.711595	-1.0577	-1.63665	-2.59155	-3.34534	-3.03926	-2.68257	-3.74857	-3.47751	-2.08626	-2.6887	-0.975786	-2.95747	0.0511027	0.417437
TGTGCAAACAAGTCCCAAGC	GPX5	Not Significant in Both and Not Common Essential	No	0.512585	0.901201	0.355801	0.713178	0.742662	0.17327	0.000179524	0.000197408	0.617376	0.00855114	0.00183759	0.00184565	0.745819	0.512585	0.115049	0.171184	1.28837	0.301304	0.000209542	0.000182687	0.00018746	0.000176006	0.000145966	0.000134751	0.000168232	0.00017354	-0.716098	-3.29708	-3.55783	-0.0802415	-2.0228	-2.28696	-2.58705	0.00184224	-2.73961	-2.97176	-3.83713	-3.23348	-2.89663	-3.10393	-3.88413	-3.23961	-1.81828	-3.23828	0.0893557	0.0100136
GGAGGTAACACAGTCTGGGA	OSBPL9	Not Significant in Both and Not Common Essential	No	0.199653	0.26285	0.989466	0.484821	0.43817	0.375054	0.0359049	4.81281	0.141533	0.421144	0.00183759	6.36382	0.00857263	0.199653	0.0990701	0.958631	0.0437307	0.160067	0.000209542	0.00365373	0.00018746	0.00176006	0.00145966	0.000134751	0.00168232	0.0017354	0.154386	-1.44025	0.996817	-0.490785	0.204723	-2.73115	1.11814	-1.70853	-2.67467	-2.41892	-2.36788	-1.95877	-1.83169	-3.85212	-1.41488	-1.9649	-0.487081	-2.31048	0.159757	0.287954
CTCATCAGCAGTGACCAGTG	IFI27	Not Significant in Both and Not Common Essential	No	0.423378	0.293573	0.321915	0.238897	0.582989	0.416726	0.107715	0.136212	0.959007	0.468175	0.178246	0.110739	0.925844	0.423378	0.677512	0.258332	0.242201	0.0941573	0.000209542	0.000182687	0.00018746	0.000176006	0.000145966	0.000134751	0.000168232	0.0017354	0.152134	-0.475465	-0.243995	0.216161	0.202692	-0.256721	-0.33391	0.200877	-3.50965	-3.15047	-3.11127	-2.72833	-3.66667	-3.28265	-3.15827	-1.73445	-0.0672783	-3.04272	0.0270632	0.776354
GGAGCCGCCCCACTCAAAAG	ZNF837	Not Significant in Both and Not Common Essential	No	0.352579	0.358432	0.304972	0.137015	0.334198	0.00021933	0.464968	0.228993	0.000244022	0.00213778	0.718497	0.132887	0.000214316	0.352579	0.322777	0.171184	0.144648	0.0470787	0.000209542	0.000182687	0.00018746	0.000176006	0.000145966	0.000134751	0.000168232	0.00017354	-3.21331	0.183163	0.223054	-3.13657	-2.22444	0.372165	-0.0132856	-3.19295	-3.18763	-2.97176	-2.8874	-2.4273	-3.34465	-3.10393	-2.9344	-2.43342	-1.37527	-2.91131	0.0221608	0.339958
CTGCTGCAGGACTTCTTCAA	HSPA1A	Not Significant in Both and Not Common Essential	No	0.495593	0.0989955	0.169429	1.05044	2.00147	0.00021933	0.00179524	0.148056	1.76672	0.00427557	0.0569652	0.0239935	2.77325	0.495593	0.399476	0.277007	0.19847	0.188315	0.000209542	0.000182687	0.00018746	0.000176006	0.00145966	0.000134751	0.000168232	0.0017354	-2.65452	-1.97487	-0.850945	-0.0541814	-1.36462	-0.473378	-1.64128	0.14164	-3.28022	-3.18078	-3.02479	-3.02936	-2.43724	-3.31296	-3.07179	-2.03549	-1.10902	-2.92158	0.00637358	0.753771
AAGTCCGGCCGTTCGCGTCG	LRRC75A	Not Significant in Both and Not Common Essential	No	0.356827	0.505219	0.403241	0.129988	0.222799	0.0021933	0.63013	0.000197408	0.0707664	0.000213778	0.806701	0.00184565	0.0342905	0.356827	0.0862869	0.121385	0.168195	0.291888	0.000209542	0.000182687	0.00018746	0.000176006	0.000145966	0.000134751	0.000168232	0.00017354	-2.36238	0.193865	-2.81854	-0.498086	-3.37352	0.301148	-1.84775	-0.812739	-2.61467	-2.82246	-2.9529	-3.21969	-2.77169	-2.95463	-2.9999	-3.22582	-1.40225	-2.94522	0.0164586	0.352019
AGATGGTGGCATGTCTCAAG	OR52A5	Not Significant in Both and Not Common Essential	No	0.389395	0.863651	0.101657	0.414557	0.107686	1.67787	0.00179524	0.0157926	1.12738	0.647749	0.000183759	0.000184565	0.942989	0.389395	0.108658	0.824796	1.38593	0.166345	0.000209542	0.000182687	0.00018746	0.000176006	0.000145966	0.00269502	0.000168232	0.00017354	0.28842	-1.75301	-1.41913	1.01991	-0.124932	-2.74289	-3.35143	0.942347	-2.71479	-3.65464	-3.86883	-2.97548	-2.87181	-2.48578	-3.91583	-2.98161	-0.89259	-3.1836	0.0737475	0.525612
ACAACGTACATGGATCCTAC	NUDT5	Not Significant in Both and Not Common Essential	No	0.499841	0.109236	1.8705	0.263489	0.672109	0.00021933	0.96584	0.000197408	0.168375	0.000213778	0.406107	0.00184565	0.000214316	0.499841	0.159791	0.0591363	0.0403668	0.141236	0.000209542	0.000182687	0.00018746	0.000176006	0.000145966	0.000134751	0.000168232	0.00017354	-2.69727	-0.287053	-3.1254	-0.601162	-2.7084	-0.663317	-2.15461	-3.49639	-2.88228	-2.51015	-2.33312	-2.90442	-3.0393	-2.64232	-2.38012	-2.91055	-1.9667	-2.70028	0.0965316	0.200746
CTGGGAATACGTCCACAGCG	ASMTL	Not Significant in Both and Not Common Essential	No	0.109031	0.03755	0.0609945	0.017566	0.0185665	0.00021933	2.11121	0.000197408	0.000244022	0.00213778	2.62224	0.000184565	0.000214316	0.109031	0.000319581	0.0155622	0.0033639	0.307581	0.000209542	0.00182687	0.00018746	0.000176006	0.000145966	0.00134751	0.000168232	0.00017354	-2.23351	1.53924	-1.94931	-1.8813	-1.24465	1.63338	-1.97852	-1.93768	-0.18331	-0.930363	-1.25393	-3.24243	-0.340329	-1.06254	-1.30093	-3.24856	-1.00654	-1.4453	0.213545	0.206701
CACTGGAGGGACCCTCATTG	ZNF821	Not Significant in Both and Not Common Essential	No	0.337004	0.324296	0.213481	0.959102	0.582989	0.348734	0.000179524	0.586302	0.0927284	0.000213778	0.00183759	1.85857	0.00642947	0.337004	0.242882	0.0902607	0.158103	0.241671	0.000209542	0.000182687	0.00018746	0.000176006	0.000145966	0.00134751	0.000168232	0.00017354	0.0315527	-3.07524	-0.213743	-0.798448	-3.18098	-2.06511	0.287314	-1.95749	-3.06412	-2.69379	-2.92603	-3.1377	-3.22114	-1.82597	-2.97303	-3.14382	-1.37152	-2.8732	0.00700468	0.653679
CCCCGTGTGGGCAGTCACGT	PPP1R32	Not Significant in Both and Not Common Essential	No	0.171334	0.256023	0.0609945	0.421583	0.137392	1.06156	0.00179524	0.130289	0.000244022	0.282188	0.000183759	0.0627522	0.000214316	0.171334	0.300406	0.398392	0.158103	0.0847416	0.000209542	0.000182687	0.00018746	0.000176006	0.000145966	0.000134751	0.000168232	0.00017354	0.617666	-1.53117	-0.509975	-2.75053	0.0422596	-2.52104	-0.827254	-2.80691	-3.15644	-3.3386	-2.92603	-2.68257	-3.31346	-3.47078	-2.97303	-2.6887	-1.28587	-3.0687	0.0165262	0.907409
CCAAGACTCACATCCCTAGG	GOLGA8J	Not Significant in Both and Not Common Essential	No	0.547985	0.385741	0.233812	0.361859	0.219085	1.26334	0.00179524	0.0098704	0.000244022	0.26081	0.000183759	0.000184565	0.000214316	0.547985	0.223707	0.339256	0.339754	0.13182	0.000209542	0.000182687	0.00018746	0.000176006	0.000145966	0.000134751	0.000168232	0.00017354	0.515224	-2.11474	-1.5642	-2.95318	-0.169972	-3.10462	-3.29239	-3.00956	-3.02841	-3.26882	-3.25826	-2.87445	-3.18543	-3.401	-3.30526	-2.88058	-1.96168	-3.15027	0.0105465	0.371271
AAACCAACGACCTCCAGGCG	COL25A1	Not Significant in Both and Not Common Essential	No	0.321428	0.259437	0.206703	0.256463	0.118826	2.18891	0.00179524	0.000197408	0.000244022	0.805945	0.000183759	0.000184565	0.000214316	0.321428	0.182161	0.417067	0.148012	0.13182	0.000209542	0.000182687	0.00018746	0.000176006	0.00145966	0.000134751	0.000168232	0.00017354	0.926196	-2.06122	-3.11366	-2.68748	0.492273	-3.0511	-3.14288	-2.74386	-2.93918	-3.3585	-2.89739	-2.87445	-2.0962	-3.49067	-2.94439	-2.88058	-1.92272	-2.93517	0.0124085	0.626529
CGTAAGGGACTCAAAATCCG	HSD17B1	Not Significant in Both and Not Common Essential	No	0.509753	0.204818	0.576059	0.358346	0.256218	0.00021933	0.000179524	1.01073	0.000244022	0.000213778	0.000183759	0.52232	0.000214316	0.509753	0.150203	0.385942	0.252292	0.360937	0.000209542	0.000182687	0.00018746	0.000176006	0.000145966	0.000134751	0.000168232	0.00017354	-2.97027	-3.50634	0.450333	-3.02118	-2.98141	-3.49622	0.163634	-3.07756	-2.85541	-3.32481	-3.12899	-3.3119	-3.01243	-3.45699	-3.17599	-3.31803	-2.30488	-3.19807	0.00559823	0.239672
CCAGGAGTACCAGACACTAG	PPRC1	DepMap Common Essential	Yes	0.311516	0.122891	0.403241	0.277542	0.048273	1.42126	0.495487	0.00394816	0.000244022	1.15227	0.137819	0.000184565	0.000214316	0.311516	0.230098	0.0902607	0.185014	0.081603	0.000209542	0.000182687	0.00018746	0.000176006	0.000145966	0.000134751	0.00168232	0.00017354	1.06315	0.0894676	-1.84693	-2.29628	0.972034	-0.466256	-3.17718	-2.35265	-3.04064	-2.69379	-2.9943	-2.66618	-3.19766	-2.82597	-2.0413	-2.67231	-1.00183	-2.76652	0.0143997	0.45158
CACAGACCAGACACAAGCTG	USP51	Not Significant in Both and Not Common Essential	No	0.351163	0.549596	0.640442	0.337266	0.512437	0.00657989	0.37341	0.000197408	0.197658	0.000213778	0.257262	0.000184565	0.694383	0.351163	0.147007	0.0217871	0.0302751	0.0690487	0.000209542	0.000182687	0.00018746	0.000176006	0.000145966	0.000134751	0.000168232	0.00017354	-1.92182	-0.234294	-3.23261	-0.413726	-3.41008	-0.396104	-3.26182	0.131959	-2.84607	-2.07649	-2.20818	-2.59363	-3.00309	-2.20867	-2.25518	-2.59976	-1.59231	-2.47388	0.112456	0.0204054
TACCTGTGGGAACAATTCCA	DDX25	Not Significant in Both and Not Common Essential	No	0.933132	0.324296	1.01996	1.95333	0.256218	0.00021933	1.40029	2.02738	0.168375	0.000213778	0.975759	3.46245	0.0535789	0.933132	0.754211	0.186746	0.114373	0.310719	0.000209542	0.000182687	0.0018746	0.000176006	0.00437899	0.000134751	0.000168232	0.00017354	-3.16984	0.137635	0.0161595	-0.182332	-3.18098	-0.0192406	0.248608	-0.679616	-3.55622	-3.00954	-1.78541	-3.24684	-2.23612	-3.14172	-2.83241	-3.25297	-0.853701	-2.88266	0.0474585	0.836065
CAGGCTCTAAACCATAGCAG	BCL2L12	Not Significant in Both and Not Common Essential	No	0.355411	0.109236	0.487956	0.576164	1.01002	0.638249	1.02329	1.09561	0.695463	0.226605	0.542088	0.81947	0.0514358	0.355411	0.41226	0.301906	0.188378	0.470787	0.000209542	0.00182687	0.00018746	0.00176006	0.000145966	0.000134751	0.000168232	0.00017354	0.766624	0.321618	0.27911	-0.162056	0.316904	0.0456891	0.152987	-1.29306	-3.2939	-2.21816	-3.00212	-2.4273	-3.45092	-3.35034	-3.04912	-3.43342	0.0534765	-3.02816	0.00204278	0.52678
CTTGCGGATATAATCCACAG	TFE3	Not Significant in Both and Not Common Essential	No	0.368155	1.07188	0.267698	0.091343	0.497583	3.98961	0.355458	0.00197408	1.86189	3.40335	0.00367518	0.00369131	3.70123	0.368155	0.102266	0.48554	0.0403668	0.342105	0.000209542	0.000182687	0.00018746	0.00352011	0.00145966	0.00134751	0.00168232	0.00347079	0.570784	0.123143	-1.66531	0.573088	0.50176	-1.86237	-1.39349	0.871481	-2.68846	-3.42452	-2.33312	-1.9876	-1.84548	-2.55669	-1.38012	-1.99373	-0.285114	-2.27621	0.0342643	0.1041
CTCACTCACAGCGCACAGTG	EAF2	Not Significant in Both and Not Common Essential	No	0.363907	0.351605	0.43035	0.741284	0.241365	0.79178	1.10766	0.132263	0.944365	0.690504	2.53955	0.0184565	0.799398	0.363907	0.294015	0.202308	0.181651	0.0784645	0.00209542	0.000182687	0.00018746	0.00176006	0.000145966	0.000134751	0.00168232	0.00017354	0.352549	0.410585	-0.748546	0.592466	0.293111	0.770935	-1.60384	0.520089	-2.1471	-3.04431	-2.98633	-1.64915	-3.30412	-3.17648	-2.03333	-2.65527	0.0734191	-2.62451	0.0103272	0.15043
GCAGCCTGAGGTCTAATGTG	RNF39	Not Significant in Both and Not Common Essential	No	0.436122	0.0785137	0.410018	0.144041	0.100259	0.0021933	2.41999	0.00394816	0.000244022	0.00213778	3.36095	0.00738262	0.000214316	0.436122	0.482567	0.224095	0.238837	0.0470787	0.000209542	0.000182687	0.00018746	0.000176006	0.00145966	0.00269502	0.000168232	0.00017354	-1.55385	0.771011	-1.56209	-2.61369	-1.56498	0.913659	-1.29028	-2.67007	-3.36229	-3.08872	-3.10519	-2.4273	-2.51931	-1.91987	-3.15219	-2.43342	-1.19629	-2.75104	0.0224365	0.345668
ACTGTCTTTCACATAAACCA	GLYAT	Not Significant in Both and Not Common Essential	No	0.455946	0.634937	0.555727	0.484821	0.048273	1.80508	0.0107715	0.0671187	0.368473	2.50121	0.000183759	0.0590609	0.126446	0.455946	0.0607204	0.118273	0.437307	0.0753259	0.000209542	0.000182687	0.00018746	0.00176006	0.000145966	0.000134751	0.00168232	0.00017354	0.453766	-1.71259	-0.858738	0.882701	0.59542	-3.48061	-0.914281	0.418201	-2.46206	-2.81118	-3.36788	-1.63142	-2.61908	-2.94335	-2.41488	-2.63754	-0.577016	-2.61092	0.0621681	0.626513
GCGGTTCAGCCAGTTCTGGA	FAM58A	Significant in Both and Not Common Essential	No	0.775958	0.696382	0.653996	1.18746	1.03973	0.37286	0.0359049	0.359283	1.46169	0.106889	0.11393	0.160572	0.720101	0.775958	0.5337	0.423291	0.484402	0.338966	0.000209542	0.00182687	0.00018746	0.000176006	0.000145966	0.000134751	0.000168232	0.00017354	-0.271302	-1.26042	-0.519182	0.147935	-0.813915	-0.758937	-0.868949	-0.159527	-3.40603	-2.36493	-3.4123	-3.28463	-3.56305	-3.49711	-3.4593	-3.29076	-0.563037	-3.28476	0.00227684	0.0429904
CAGGAACCAAATCATCACAG	USP17L13	Not Significant in Both and Not Common Essential	No	0.373819	0.129718	0.376133	0.470768	0.107686	0.0021933	0.192091	0.221097	0.00488044	0.00213778	1.04007	0.0553696	0.000214316	0.373819	0.067112	0.0404617	0.0370029	0.000313858	0.000209542	0.000182687	0.00018746	0.000176006	0.000145966	0.000134751	0.000168232	0.00017354	-1.7719	-0.291834	-0.328224	-1.3437	-1.78304	0.441721	-0.929536	-2.7011	-2.50553	-2.34534	-2.29533	-0.251206	-2.66255	-2.47751	-2.34233	-0.257334	-1.08845	-1.89214	0.204288	0.498085
GCGGCCCGCAACGTGCCCGT	UNG	Not Significant in Both and Not Common Essential	No	0.126022	0.00682728	0.0440516	0.00351319	0.0222799	1.58575	0.00179524	0.000197408	0.00244022	1.67175	0.000183759	0.000184565	0.000214316	0.126022	0.0990701	0.0622487	0.00033639	0.02197	0.000209542	0.000182687	0.00018746	0.00176006	0.000145966	0.000134751	0.000168232	0.00017354	2.36599	-1.38984	-1.25034	-0.960484	2.38892	-2.37971	-1.27955	-2.01686	-2.67467	-2.53242	-0.253934	-1.0963	-2.83169	-2.6646	-0.300934	-2.10243	-0.565234	-1.80712	0.0576024	0.211555
GATAAAATACCAGTAATGCG	DDHD1	Not Significant in Both and Not Common Essential	No	0.218061	0.00682728	0.59639	0.667507	0.103973	0.00021933	0.570887	0.0454039	0.290386	0.000213778	0.362005	0.00184565	0.246463	0.218061	0.166182	0.136947	0.154739	0.0753259	0.000209542	0.000182687	0.00018746	0.000176006	0.000145966	0.000134751	0.000168232	0.00017354	-1.49315	-0.0189802	-1.16736	0.446055	-1.50428	-0.216816	-2.55831	0.374831	-2.89931	-2.87484	-2.91669	-2.63142	-3.05633	-3.00702	-2.96369	-2.63754	-0.767252	-2.87336	0.00289042	0.427735
ATGCTATTAATCAGCGAACA	ZNF425	Not Significant in Both and Not Common Essential	No	0.420546	0.290159	0.220258	0.129988	0.0334198	0.114051	0.0323144	0.000197408	0.317229	0.309979	0.374868	0.000184565	0.36648	0.420546	0.156595	0.469978	0.363301	0.059633	0.000209542	0.000182687	0.00018746	0.000176006	0.000145966	0.000134751	0.000168232	0.00017354	-0.405537	-0.833536	-2.81854	0.977369	0.0286962	0.230947	-2.84775	1.04005	-2.87351	-3.41037	-3.28736	-2.52996	-3.03053	-3.54255	-3.33436	-2.53609	-0.578538	-3.06809	0.02069	0.748224
GCAATGAAGATTCCCTTCAG	DENND5A	Not Significant in Both and Not Common Essential	No	0.196821	0.146786	0.196538	0.144041	0.0445597	0.761074	0.0933526	0.000197408	0.000244022	0.371975	0.284826	0.000184565	0.000214316	0.196821	0.051133	0.0248995	0.0605502	0.0282472	0.000209542	0.000182687	0.00018746	0.000176006	0.000145966	0.000134751	0.000168232	0.00017354	0.714742	-0.32332	-2.86312	-2.26151	0.403829	0.161133	-2.89234	-2.31789	-2.38743	-2.13448	-2.50921	-2.20545	-2.54445	-2.26666	-2.55621	-2.21158	-1.17231	-2.35193	0.0860997	0.677883
CCCGGGCCAAGAAATTCCAG	RNASE1	Not Significant in Both and Not Common Essential	No	0.18691	0.77831	0.169429	0.0632375	0.0334198	0.00021933	0.000179524	0.43035	0.000244022	0.000213778	0.000183759	1.07971	0.000214316	0.18691	0.118245	0.0684736	0.0807336	0.128682	0.000209542	0.000182687	0.00018746	0.000176006	0.000145966	0.000134751	0.000168232	0.00017354	-3.55005	-2.97487	0.832847	-2.13657	-3.56119	-2.96474	1.23233	-2.19295	-2.75151	-2.57382	-2.63415	-2.86399	-2.90853	-2.70599	-2.68115	-2.87012	-1.9144	-2.74866	0.00504281	0.773305
GCCGCAAGGAGACCGACATG	NRIP3	Not Significant in Both and Not Common Essential	No	0.239301	0.56325	0.172818	0.249437	0.096546	0.0021933	1.30873	0.00197408	0.00244022	0.000213778	0.194784	0.000184565	0.000214316	0.239301	0.0127832	0.0155622	0.255656	0.0156929	0.000209542	0.000182687	0.00018746	0.000176006	0.000145966	0.000134751	0.000168232	0.00017354	-2.4096	0.879261	-2.1016	-1.59731	-3.42074	0.0519643	-3.13081	-2.65368	-1.78537	-1.93036	-3.13475	-1.95018	-1.94239	-2.06254	-3.18175	-1.9563	-1.79781	-2.24295	0.132455	0.6847
CCATGTATTCATCTTGACAC	C1QTNF3	Not Significant in Both and Not Common Essential	No	0.77879	0.454014	1.23344	0.137015	0.349051	0.333381	0.657059	0.00592224	0.44168	0.138956	1.37819	0.00184565	0.210029	0.77879	0.351539	0.921281	0.911617	0.332689	0.000209542	0.000182687	0.00018746	0.000176006	0.000145966	0.000134751	0.00168232	0.00017354	-0.134128	-0.273514	-1.36428	0.102219	-0.514192	0.0481911	-1.87062	-0.22061	-3.2247	-3.70268	-3.6869	-3.27651	-3.38172	-3.83486	-2.7339	-3.28264	-0.528367	-3.39049	0.00751827	0.455904
GAAGGAGGTAGACCATTACT	ST5	Not Significant in Both and Not Common Essential	No	0.191157	0.119477	0.0542173	0.839653	0.371331	1.8665	0.00179524	1.84182	0.000244022	1.3126	0.00183759	1.27904	0.00214316	0.191157	0.0798953	1.15471	0.124464	0.470787	0.000209542	0.000182687	0.00018746	0.000176006	0.00145966	0.000134751	0.00168232	0.0017354	1.19374	-1.48002	0.341147	-3.18233	1.04085	-1.46989	0.182784	-2.23871	-2.58125	-3.80077	-2.82214	-3.4273	-1.73827	-3.93294	-1.86914	-2.43342	-0.701553	-2.82565	0.113263	0.192864
GGTGGGCAGCGCGTACACGG	GALR1	Not Significant in Both and Not Common Essential	No	0.17275	0.167268	0.125378	0.0948562	1.37764	0.00021933	0.981998	0.000197408	0.876039	0.000213778	0.104742	0.000184565	0.867979	0.17275	0.0735037	0.0684736	0.0134556	0.100435	0.000209542	0.000182687	0.00018746	0.000176006	0.000145966	0.00134751	0.000168232	0.00017354	-2.88231	0.893889	-2.6817	-0.196612	-2.89345	-0.0781005	-2.71092	-0.200627	-2.54504	-2.57382	-1.85599	-2.75636	-2.70206	-1.70599	-1.90299	-2.76249	-1.34373	-2.35059	0.0301583	0.91281
ATTTGCATCCAAATATACTG	RNF217	Not Significant in Both and Not Common Essential	No	0.774542	0.136546	0.179595	0.945049	0.0816928	0.675535	0.000179524	0.0217149	0.265984	0.517344	0.00183759	0.000184565	0.0214316	0.774542	0.271644	0.158734	1.22782	0.119266	0.000209542	0.000182687	0.00018746	0.000176006	0.000145966	0.000134751	0.000168232	0.00017354	0.694369	-3.00017	-1.6387	0.512672	0.5785	-1.99005	-3.7093	-0.581129	-3.11273	-2.93896	-3.81623	-2.83099	-3.26975	-3.07114	-3.86323	-2.83712	-1.14173	-3.21752	0.0758747	0.291732
GGAGGATATCTACTCCGGTG	HNRNPA0	Not Significant in Both and Not Common Essential	No	0.236469	0.0751001	0.0304972	0.101883	0.159672	0.00021933	0.000179524	0.835036	0.000244022	0.000213778	0.000183759	0.666281	0.000214316	0.236469	0.0447414	0.0466866	0.222017	0.10985	0.000209542	0.000182687	0.00018746	0.000176006	0.000145966	0.000134751	0.000168232	0.00017354	-2.53454	-2.23014	0.913603	-2.8158	-2.54568	-2.22001	0.815556	-2.87217	-2.32944	-2.40748	-3.07348	-2.79527	-2.48646	-2.53966	-3.12048	-2.8014	-1.68615	-2.69421	0.033615	0.616578
CGGCGCGCCAGTGTACCTGG	H2AFX	Not Significant in Both and Not Common Essential	No	0.72215	0.382328	0.355801	0.467255	1.88265	0.100892	0.89044	0.0197408	0.0146413	0.00213778	0.459397	0.000184565	0.0150021	0.72215	0.741428	0.317469	0.245565	0.812892	0.000209542	0.000182687	0.00018746	0.000176006	0.000145966	0.000134751	0.000168232	0.00017354	-0.578579	0.398397	-1.37419	-2.10919	-2.25247	0.110981	-3.4034	-2.09862	-3.5488	-3.23999	-3.11726	-3.66451	-3.70582	-3.37217	-3.16426	-3.67063	-1.41338	-3.43543	0.008689	0.119448
CGCTAACACTTGCAACATCG	RND1	Not Significant in Both and Not Common Essential	No	0.385147	0.0989955	0.111823	0.302135	0.204232	0.00021933	0.000179524	1.90301	0.000244022	0.000213778	0.000183759	1.42854	0.000214316	0.385147	0.143812	0.35793	0.144648	0.125543	0.000209542	0.000182687	0.0018746	0.000176006	0.000145966	0.000134751	0.000168232	0.00017354	-2.65452	-2.79441	0.79924	-2.92269	-2.66565	-2.78428	0.674691	-2.97907	-2.83652	-3.29209	-1.8874	-2.85327	-2.99354	-3.42427	-2.9344	-2.85939	-1.91584	-2.88511	0.0158612	0.507124
ATGGACATCCCGGTACTTTG	NRM	Not Significant in Both and Not Common Essential	No	0.538073	0.518873	0.0779374	0.463741	0.233938	1.46951	0.00359049	0.564587	0.000244022	2.65513	0.000183759	0.223324	0.00214316	0.538073	0.479372	0.351705	0.0874614	0.737566	0.000209542	0.000182687	0.00018746	0.00176006	0.000145966	0.000134751	0.000168232	0.0017354	0.452111	-1.33659	0.0854554	-2.98167	0.709025	-2.6275	-0.31734	-2.03805	-3.3594	-3.28447	-2.66891	-2.62227	-3.51642	-3.41665	-2.71591	-2.6284	-1.00682	-3.02655	0.0152089	0.502803
TTGGCTGCTGGCTTCCATAG	USP17L11	Not Significant in Both and Not Common Essential	No	0.515417	0.576905	0.162652	0.161607	0.215372	0.328994	0.000179524	0.00197408	0.819914	0.207365	0.00183759	0.000184565	0.137162	0.515417	0.268448	0.298794	0.242201	0.225978	0.000209542	0.000182687	0.00018746	0.000176006	0.000145966	0.000134751	0.000168232	0.00017354	-0.243916	-2.95714	-1.9131	0.580579	-0.444369	-1.94701	-2.94231	-0.195955	-3.10759	-3.21366	-3.11127	-3.10854	-3.26461	-3.34584	-3.15827	-3.11467	-1.2579	-3.17806	0.00419635	0.325991
GGGAGAAGCAGCCAAACTAT	BMP4	Not Significant in Both and Not Common Essential	No	0.835429	1.32791	0.47779	0.853706	0.479017	0.686502	0.0538573	0.15003	3.41143	1.45583	0.143332	0.0110739	5.20359	0.835429	0.204532	0.413954	0.925072	0.273056	0.000209542	0.000182687	0.00018746	0.000176006	0.00291933	0.00134751	0.00504697	0.00017354	-0.286527	-0.947992	-0.75513	0.852586	0.039942	-0.522894	-1.88701	1.03595	-2.98949	-3.35524	-3.69327	-3.19072	-1.84548	-2.48742	-2.26314	-3.19685	-0.308884	-2.8777	0.0229874	0.419813
CTCGGGGTACCCCCTCCAGG	SPDYE2	Not Significant in Both and Not Common Essential	No	0.233637	0.570078	0.145709	0.783442	0.0519863	0.217136	0.000179524	1.05219	0.000244022	0.0192401	0.000183759	0.204868	0.000214316	0.233637	0.0830911	0.252107	0.420487	0.0941573	0.000209542	0.000182687	0.00018746	0.000176006	0.000145966	0.000134751	0.000168232	0.00017354	-0.419202	-2.90936	0.128087	-2.32846	-1.47173	-2.89924	-0.582533	-2.38483	-2.59828	-3.13988	-3.35084	-2.72833	-2.7553	-3.27205	-3.39784	-2.73445	-1.60841	-2.99712	0.0245847	0.38749
GATGTTGAGTAAATAATGAG	ZNF527	Not Significant in Both and Not Common Essential	No	0.297356	0.0921683	0.230424	0.137015	0.293351	0.00021933	0.385977	0.0611965	0.000244022	0.000213778	0.99046	0.0553696	0.000214316	0.297356	0.0287623	0.143172	0.238837	0.0313858	0.000209542	0.000182687	0.00018746	0.000176006	0.000145966	0.000134751	0.000168232	0.00017354	-2.62348	0.224034	-0.350042	-3.07996	-2.63462	0.633309	-0.393497	-3.13633	-2.13755	-2.89415	-3.10519	-2.25121	-2.29457	-3.02633	-3.15219	-2.25733	-1.42007	-2.63982	0.052232	0.862337
TATGTGGTAAGTCCTTTACC	ZNF883	Not Significant in Both and Not Common Essential	No	0.516833	0.245782	0.257532	0.193226	0.282211	0.0438659	1.05919	1.44898	0.6613	0.0213778	0.575165	1.78475	0.730817	0.516833	0.332364	0.164959	0.252292	0.191453	0.000209542	0.00182687	0.00018746	0.000176006	0.00145966	0.000134751	0.00168232	0.00017354	-0.748423	0.614143	0.874997	0.369825	-1.06059	0.348961	0.965512	0.413235	-3.20034	-1.95567	-3.12899	-3.03653	-2.35736	-3.08784	-2.17599	-3.04266	0.222208	-2.74818	0.0100409	0.0628031
AGTACCTGATGGTTACTCGG	SDK2	Not Significant in Both and Not Common Essential	No	0.46161	0.959233	0.301584	0.105396	0.204232	0.221523	0.00179524	0.000197408	1.72768	0.177436	0.00183759	0.000184565	1.13587	0.46161	0.47298	0.622487	0.696327	0.957266	0.000209542	0.00182687	0.00018746	0.000176006	0.000145966	0.000134751	0.000168232	0.00017354	-0.636505	-2.22529	-2.72746	0.92734	-0.732882	-2.21516	-2.75667	0.745205	-3.35357	-2.53242	-3.5699	-3.73551	-3.51059	-3.6646	-3.6169	-3.74163	-1.20268	-3.46564	0.00208882	0.994633
GCGAGTCGTCAGAGTCGATG	GRIK3	Not Significant in Both and Not Common Essential	No	0.201069	0.167268	0.121989	0.0808034	0.0854061	0.473752	0.493692	0.00394816	0.000244022	0.215916	0.299527	0.00184565	0.000214316	0.201069	0.115049	0.224095	0.262384	0.354659	0.000209542	0.000182687	0.00018746	0.000176006	0.000145966	0.000134751	0.000168232	0.00017354	0.452138	0.607135	-1.31103	-2.54406	0.110872	0.390115	-1.64128	-2.60043	-2.73961	-3.08872	-3.14603	-3.30428	-2.89663	-3.2209	-3.19303	-3.31041	-0.817069	-3.11245	0.00411198	0.511577
TATGGAGCAGTAACTTGTGA	NR2C1	Not Significant in Both and Not Common Essential	No	0.487098	0.716864	1.08096	0.259976	0.111399	0.00021933	0.854535	0.000197408	0.00488044	0.000213778	0.626617	0.000184565	0.000214316	0.487098	0.140616	0.342368	0.222017	0.232255	0.000209542	0.000182687	0.00018746	0.000176006	0.000145966	0.000134751	0.000168232	0.00017354	-3.51434	-0.10208	-3.11957	-1.35842	-3.52547	-0.236807	-3.14878	-2.71583	-2.82676	-3.27279	-3.07348	-3.12044	-2.98378	-3.40496	-3.12048	-3.12657	-2.21516	-3.11616	0.00894528	0.140531
GAGTCTTCCTGTCGTATTGG	PRSS1	Not Significant in Both and Not Common Essential	No	0.263372	0.0785137	0.196538	0.0421583	0.144819	0.00021933	0.0682192	0.568535	1.57394	0.00213778	0.000183759	0.562925	0.381482	0.263372	0.067112	0.591363	0.0470946	0.288749	0.000209542	0.000182687	0.00018746	0.000176006	0.000145966	0.000134751	0.000168232	0.0017354	-2.55385	-0.45954	1.12987	1.03616	-1.56498	-3.0292	1.12557	0.420649	-2.50553	-3.51015	-2.40006	-3.21499	-2.66255	-3.64232	-2.44706	-2.22112	-0.486914	-2.82547	0.0627661	0.236218
CACACTCGCTACTTCAGGGG	MRPS2	Not Significant in Both and Not Common Essential	No	0.403555	0.317468	0.254144	1.2261	0.790935	0.00021933	0.18491	0.24676	1.88385	0.000213778	0.207647	0.612757	1.5195	0.403555	0.508134	0.161847	0.117736	0.0345244	0.000209542	0.00182687	0.00018746	0.000176006	0.00145966	0.000134751	0.000168232	0.00017354	-3.1606	-0.138119	-0.696251	0.376906	-3.17174	-0.0877542	-0.301238	0.28356	-3.38471	-1.9474	-2.798	-2.2926	-2.54173	-3.07957	-2.845	-2.29873	-0.861904	-2.64847	0.053001	0.959165
GCGTACCTTCTCGATGAAGT	PRPH	Not Significant in Both and Not Common Essential	No	0.29594	0.423291	0.718379	0.228358	0.397324	4.00496	0.00179524	0.00197408	0.0854077	1.6012	0.00183759	0.00184565	0.0557221	0.29594	0.134224	0.522889	0.0470946	0.0721873	0.00419084	0.000182687	0.00018746	0.000176006	0.000145966	0.000134751	0.000168232	0.00017354	0.975959	-2.60223	-2.06325	-0.667648	0.577807	-2.59211	-2.09247	-0.853117	-1.50553	-3.4567	-2.40006	-2.61293	-2.96358	-3.58888	-2.44706	-2.61906	-1.16463	-2.69923	0.0729804	0.569539
GCCGGTGATGTAGACGAAAG	CEMIP	Not Significant in Both and Not Common Essential	No	0.161422	0.0546182	0.0609945	0.228358	0.0631262	0.0021933	0.000179524	0.811347	0.000244022	0.000213778	0.00183759	0.66259	0.000214316	0.161422	0.0415455	0.0186746	0.0941892	0.02197	0.000209542	0.000182687	0.00018746	0.000176006	0.000145966	0.000134751	0.000168232	0.00017354	-1.39624	-2.53117	0.55059	-2.41278	-2.40737	-1.52104	0.462629	-2.46916	-2.29725	-2.00954	-2.70109	-2.0963	-2.45427	-2.14172	-2.74809	-2.10243	-1.46557	-2.31884	0.06758	0.588156
TACAAAAAATTTGTGCAGGA	ZNF577	Significant in Both and Not Common Essential	No	0.472938	0.252609	0.874254	0.091343	0.256218	0.00438659	3.27991	3.47833	1.34944	0.00427557	4.48371	6.3509	1.4102	0.472938	0.230098	0.501102	0.0975531	0.323274	0.00209542	0.00365373	0.0018746	0.00352011	0.00291933	0.00134751	0.000168232	0.00347079	-1.76032	0.574224	1.5807	0.721544	-1.77145	0.71	1.84216	0.740671	-2.04064	-2.13719	-1.71633	-1.96301	-1.89663	-2.57039	-2.76333	-1.96914	0.32969	-2.13208	0.0128478	0.0300809
TCATACCTATAGTATCTGGG	SHOC2	Not Significant in Both and Not Common Essential	No	0.628696	0.194577	0.420184	0.618322	0.883767	0.0021933	0.118486	1.70166	0.729626	0.000213778	0.0275638	1.29011	0.694383	0.628696	0.210924	0.379717	0.524768	0.787783	0.000209542	0.000182687	0.00018746	0.00176006	0.00145966	0.000134751	0.000168232	0.00017354	-1.94799	-0.549772	0.439658	-0.0832375	-2.95913	-1.1831	0.319412	-0.104739	-3.00285	-3.31775	-3.44706	-2.65088	-2.15987	-3.44993	-3.49406	-3.65701	-0.758613	-3.14743	0.00705015	0.935503
CAGATACTTCTATAACCAGG	HLA-DRB1	Not Significant in Both and Not Common Essential	No	0.247797	0.0955819	0.115212	0.0667507	0.00371331	1.14051	0.000179524	0.000197408	0.000244022	1.73161	0.000183759	0.000184565	0.000214316	0.247797	0.0798953	0.0529114	0.00033639	0.310719	0.000209542	0.000182687	0.00018746	0.000176006	0.00145966	0.000134751	0.000168232	0.00017354	1.07672	-2.80738	-2.52909	-1.18233	1.25807	-2.79725	-2.55831	-1.23871	-2.58125	-2.46184	-0.253934	-3.24684	-1.73827	-2.59402	-0.300934	-3.25297	-1.34728	-2.05376	0.0821503	0.333519
TGAGATTGCTATCGACAACA	STX3	Not Significant in Both and Not Common Essential	No	0.913308	0.409637	0.603168	0.256463	0.349051	0.38602	2.69107	0.0355335	0.00976088	0.925661	1.76041	0.00369131	0.000214316	0.913308	0.284427	0.301906	0.164831	1.22718	0.000209542	0.000182687	0.00018746	0.000176006	0.000145966	0.00269502	0.00168232	0.00017354	-0.0257894	0.649487	-0.858387	-1.5534	0.354053	0.465176	-1.84184	-3.21183	-3.1327	-3.21816	-2.94413	-3.84338	-3.28972	-2.04931	-1.99113	-3.84951	-0.752817	-3.03976	0.0501035	0.572717
GAACCACCTACTGAACCGAC	EIF4ENIF1	Not Significant in Both and Not Common Essential	No	0.239301	0.0682728	0.294807	0.302135	0.048273	0.00021933	0.398544	0.00197408	0.44412	0.000213778	0.130469	0.000184565	0.490783	0.239301	0.0415455	0.0560239	0.0740058	0.0408015	0.000209542	0.000182687	0.00018746	0.000176006	0.000145966	0.000134751	0.000168232	0.00017354	-2.49315	0.130938	-2.18484	0.963796	-2.50428	-0.35403	-3.21405	1.00719	-2.29725	-2.48667	-2.59636	-2.36515	-2.45427	-2.61884	-2.64336	-2.37128	-1.08105	-2.47915	0.0751846	0.941183
CCATATGAATGCAATAACTG	ZNF585B	Not Significant in Both and Not Common Essential	No	0.869412	0.276505	0.288029	1.15233	1.38506	0.918991	0.00179524	0.361257	0.287946	0.581477	0.00183759	0.581381	0.342905	0.869412	0.399476	0.516665	0.218653	0.502173	0.000209542	0.000182687	0.00018746	0.000176006	0.000145966	0.000134751	0.00168232	0.00017354	0.521608	-2.20531	-0.503761	-0.682158	0.32283	-2.19519	-0.297116	-0.606295	-3.28022	-3.4515	-3.06685	-3.45533	-3.43724	-3.58368	-2.11385	-3.46145	-0.705674	-3.23126	0.00922458	0.152486
ACTGGTCACCCAACATCCGA	BCL2L15	Not Significant in Both and Not Common Essential	No	0.834013	0.184337	0.189761	0.295108	0.453024	0.0021933	1.34464	0.574457	0.0780871	0.000213778	0.736873	0.454031	0.0214316	0.834013	0.300406	0.236545	0.568499	0.125543	0.000209542	0.00182687	0.00018746	0.000176006	0.000145966	0.000134751	0.000168232	0.00017354	-1.92451	0.850399	0.289277	-0.763542	-2.93565	0.589186	0.187105	-1.32507	-3.15644	-2.11221	-3.48182	-2.85327	-3.31346	-3.24438	-3.52882	-2.85939	-0.629101	-3.06872	0.0321992	0.961615
AATTAGTGCGGAATAAGAGT	ATRX	Not Significant in Both and Not Common Essential	No	0.329924	0.129718	0.0542173	0.0386451	0.0408464	1.10981	0.00179524	0.000197408	0.000244022	0.348459	0.000183759	0.00184565	0.000214316	0.329924	0.105462	0.0217871	0.158103	0.0251086	0.000209542	0.000182687	0.00018746	0.000176006	0.000145966	0.000134751	0.000168232	0.00017354	0.932248	-1.48002	-2.29173	-2.22372	0.429151	-2.46989	-1.32095	-2.2801	-2.70182	-2.07649	-2.92603	-2.1543	-2.85884	-2.20867	-2.97303	-2.16042	-1.33813	-2.50745	0.0866727	0.678537
GGAGTACGAGAGCCACCGCG	RBM47	Not Significant in Both and Not Common Essential	No	0.209565	0.505219	0.216869	0.91343	0.716669	0.021933	1.5834	0.155952	0.400196	0.000213778	2.35395	0.0239935	0.0600084	0.209565	0.380302	0.118273	0.178287	0.119266	0.000209542	0.00182687	0.00018746	0.000176006	0.00145966	0.000134751	0.000168232	0.00017354	-1.36238	0.863393	-0.767684	-0.253046	-3.37352	1.0356	-1.58058	-1.07711	-3.25886	-1.81118	-2.97821	-2.83099	-2.41588	-2.94335	-3.02521	-2.83712	-0.814415	-2.7626	0.0140208	0.859841
CAGTAAGACTAACGAAACAA	ANKIB1	Not Significant in Both and Not Common Essential	No	0.528161	0.863651	0.410018	2.16413	0.575563	4.03567	0.346482	1.9425	0.0292826	6.2124	0.139657	4.9482	0.0342905	0.528161	0.437826	0.463753	0.228745	0.527281	0.00209542	0.000182687	0.0018746	0.00176006	0.00291933	0.00269502	0.00168232	0.00347079	0.669577	-0.0731222	-0.0469223	-1.29348	0.856921	-0.46774	0.359164	-1.22492	-2.32003	-3.40458	-2.08644	-2.47651	-2.17602	-2.23572	-2.13344	-2.18161	-0.152566	-2.3768	0.00138355	0.202382
GGCACAGAGACTGATGTGCA	HEPH	Not Significant in Both and Not Common Essential	No	0.342667	1.56003	0.481179	0.351319	1.12885	1.28527	0.193886	0.00197408	0.156174	2.92449	0.0165383	0.0166109	0.00214316	0.342667	0.143812	0.23032	0.141284	0.856832	0.000209542	0.00182687	0.00018746	0.000176006	0.00145966	0.000134751	0.000168232	0.00017354	-0.0841386	-0.39476	-2.25034	-0.859028	0.272917	-1.46382	-1.32531	-2.72158	-2.83652	-2.10062	-2.87718	-3.68737	-1.99354	-3.2328	-2.92418	-3.6935	-1.10326	-2.91822	0.0624526	0.66314
TGGCCATCGCCAAGACGCCG	ADRB1	Not Significant in Both and Not Common Essential	No	0.390811	0.836342	0.135543	0.66048	0.712955	0.164497	0.00179524	0.471805	0.0512446	0.0106889	0.000183759	0.76041	0.000214316	0.390811	0.271644	0.24277	0.302751	0.332689	0.000209542	0.000182687	0.00018746	0.000176006	0.000145966	0.000134751	0.000168232	0.00017354	-0.706226	-1.87795	-0.146097	-1.14341	-1.89345	-2.86783	0.0611881	-3.52201	-3.11273	-3.12349	-3.20818	-3.27651	-3.26975	-3.25566	-3.25518	-3.28264	-1.51197	-3.22302	0.000272307	0.0509615
GAAAATCCTTGATATTAACC	SEMA3A	Not Significant in Both and Not Common Essential	No	0.557897	0.344778	0.213481	0.126475	0.660969	0.0745721	0.244153	0.000197408	0.671061	0.0192401	0.110255	0.000184565	0.340762	0.557897	0.262057	0.174296	0.232109	0.0408015	0.000209542	0.000182687	0.00018746	0.000176006	0.000145966	0.000134751	0.000168232	0.00017354	-0.664963	0.0583028	-2.80664	0.00658091	-1.25333	-0.286961	-2.83586	-0.28773	-3.09712	-2.97958	-3.09278	-2.36515	-3.25414	-3.11176	-3.13978	-2.37128	-1.00882	-2.92645	0.040842	0.162756
TCAGGCGGGTATAGTCATTG	B4GALNT3	Not Significant in Both and Not Common Essential	No	0.344083	0.406223	0.687882	1.74254	0.211659	0.00877319	0.657059	1.05613	0.183017	0.196676	0.05329	0.943129	0.0171453	0.344083	0.118245	0.130722	0.0134556	0.527281	0.000209542	0.000182687	0.00018746	0.000176006	0.000145966	0.000134751	0.000168232	0.0017354	-1.66561	-0.0199096	-0.217465	-0.0631453	-0.315013	-1.11087	-0.266612	-1.09149	-2.75151	-2.85464	-1.85599	-3.47651	-2.90853	-2.98682	-1.90299	-2.48264	-0.593764	-2.65246	0.0703391	0.393569
CCTGGAATAACATACAAACC	SOX6	Not Significant in Both and Not Common Essential	No	0.327092	0.0409637	0.464236	0.221331	0.0705529	0.350927	0.409315	0.000197408	0.000244022	0.557962	0.139657	0.000184565	0.000214316	0.327092	0.0958743	0.0311244	0.0033639	0.081603	0.000209542	0.000182687	0.00018746	0.000176006	0.000145966	0.000134751	0.000168232	0.00017354	0.932818	-0.0546812	-3.04968	-2.46109	1.13421	-0.521676	-3.07889	-2.51746	-2.66043	-2.23139	-1.25393	-2.66618	-2.81745	-2.36357	-1.30093	-2.67231	-1.20206	-2.24577	0.133593	0.712936
AATGCCAGTAAATCTTCTAG	MIER3	Not Significant in Both and Not Common Essential	No	0.372403	0.0921683	0.182983	0.207278	0.111399	0.614123	0.00179524	0.000197408	0.190337	0.421144	0.000183759	0.000184565	0.229318	0.372403	0.0415455	0.14006	1.12018	0.103573	0.000209542	0.000182687	0.00018746	0.000176006	0.000145966	0.000134751	0.000168232	0.00017354	0.823674	-2.00829	-3.02119	0.232642	0.659849	-2.99816	-3.0504	0.313557	-2.29725	-2.88461	-3.77638	-2.76972	-2.45427	-3.01678	-3.82338	-2.77585	-1.13104	-2.97478	0.148954	0.910216
GCTGACTCACGCCACCACAG	FOXN4	Not Significant in Both and Not Common Essential	No	0.2747	0.116064	0.189761	0.112422	1.02859	0.0021933	0.0107715	0.00592224	0.614936	0.000213778	0.000183759	0.000184565	0.820829	0.2747	0.421847	0.174296	0.302751	0.0376629	0.000209542	0.000182687	0.00018746	0.000176006	0.000145966	0.000134751	0.000168232	0.00017354	-1.7236	-1.24593	-1.27837	-0.223412	-2.73473	-3.01396	-2.7847	-0.0979896	-3.30388	-2.97958	-3.20818	-2.33039	-3.4609	-3.11176	-3.25518	-2.33651	-1.63784	-2.9983	0.0199847	0.463035
CAAACTCAAAATCAAGCTTG	INO80B	DepMap Common Essential	Yes	0.569224	0.105823	0.108435	0.5059	1.14741	0.0021933	0.00359049	0.744228	0.971208	0.000213778	0.000183759	0.786249	0.72653	0.569224	0.172574	1.27299	0.033639	0.00313858	0.000209542	0.000182687	0.0018746	0.000176006	0.000145966	0.000134751	0.000168232	0.00017354	-1.68348	-1.48002	0.167641	-0.0724064	-2.69462	-2.77092	0.191495	-0.198465	-2.9157	-3.84312	-1.25393	-1.25121	-3.07272	-3.97529	-2.30093	-1.25733	-1.0676	-2.48378	0.160212	0.743416
TTATTTCTAACTAGACAGGA	ABCA9	Not Significant in Both and Not Common Essential	No	0.63436	1.03433	0.210092	0.245923	0.226512	0.736948	0.296215	0.00394816	3.60665	1.443	0.470422	0.00184565	1.22374	0.63436	1.08658	0.426404	0.39694	0.0721873	0.000209542	0.00182687	0.00018746	0.00176006	0.00291933	0.000134751	0.000168232	0.00017354	-0.147222	0.149198	-1.7944	1.20201	0.144607	0.350078	-2.12465	0.732598	-3.71479	-2.36811	-3.32582	-1.61293	-2.57078	-3.50029	-3.37282	-2.61906	-0.185973	-2.88557	0.0353204	0.293153
CCCGTCCCTATGCACCAGCA	BTN1A1	Not Significant in Both and Not Common Essential	No	0.481434	0.501805	0.179595	0.231871	0.0928327	1.62304	0.00538573	6.29534	0.0292826	0.45321	0.00183759	2.58392	0.00857263	0.481434	1.54038	0.345481	0.269112	0.539835	0.000209542	0.000182687	0.0018746	0.00176006	0.00437899	0.000134751	0.000168232	0.0017354	0.509794	-1.52305	1.43377	-0.501091	-0.0442355	-1.99005	1.04703	-1.03459	-3.86636	-3.27672	-2.15702	-2.48673	-2.54625	-3.40889	-3.20402	-2.49286	-0.262801	-2.92986	0.0518672	0.21069
TTCCACCGAGGTCAACGTGT	SKOR1	Not Significant in Both and Not Common Essential	No	0.910476	0.607628	0.772597	0.579677	0.512437	0.0723788	0.0574478	0.136212	3.00391	0.0128267	0.0128631	0.101511	2.95327	0.910476	0.687099	0.133835	0.205198	0.778367	0.000209542	0.000182687	0.00018746	0.00176006	0.000145966	0.000134751	0.00168232	0.0017354	-0.924026	-1.12868	-0.628971	0.768046	-1.67552	-1.77861	-0.756673	0.760663	-3.51575	-2.86486	-3.03926	-2.64566	-3.67277	-2.99704	-2.08626	-2.65178	-0.670471	-2.93417	0.025944	0.81468
GTGGGGTGGCGTAAGCACCC	CAMSAP3	Not Significant in Both and Not Common Essential	No	0.15151	0.484737	0.33547	0.228358	0.0519863	4.95904	0.000179524	0.0611965	0.00244022	3.40549	0.00183759	0.287922	0.000214316	0.15151	0.0383497	0.108935	0.296023	0.0659101	0.00209542	0.000182687	0.0018746	0.00352011	0.000145966	0.000134751	0.000168232	0.00017354	1.00989	-3.27153	-0.57189	-1.32846	0.846673	-2.26141	0.100659	-2.38483	-1.26249	-2.77546	-2.19842	-1.2724	-2.41951	-2.90764	-3.24542	-2.57955	-0.982612	-2.33261	0.0442323	0.26582
AAGGCGCTGACTCTTCAGAA	GSDMC	Not Significant in Both and Not Common Essential	No	0.222309	0.0238955	0.410018	0.0702638	0.627549	0.00021933	1.95502	0.00394816	0.21962	0.00213778	2.11874	0.000184565	0.257179	0.222309	0.0543288	0.513552	0.0639141	0.15379	0.000209542	0.00182687	0.00018746	0.000176006	0.00145966	0.000134751	0.000168232	0.00017354	-2.03722	0.678348	-1.25034	-0.455976	-1.04835	0.713275	-2.58058	-0.387412	-2.41376	-2.44888	-2.53269	-2.9414	-1.57078	-3.58105	-2.57969	-2.94753	-0.796032	-2.62697	0.0745921	0.405398
GTGGAAGGCGCTCTTCGGCA	TRAPPC5	DepMap Common Essential	Yes	0.205317	0.228714	0.0779374	0.0562111	0.211659	1.04401	0.000179524	0.000197408	0.000244022	0.399766	0.000183759	0.00184565	0.000214316	0.205317	0.0798953	0.136947	0.033639	0.081603	0.000209542	0.000182687	0.00018746	0.000176006	0.000145966	0.000134751	0.000168232	0.00017354	0.659412	-2.63762	-2.45446	-2.93821	0.242513	-2.6275	-1.48367	-2.99458	-2.58125	-2.87484	-2.25393	-2.66618	-2.73827	-3.00702	-2.30093	-2.67231	-1.77926	-2.63684	0.0218463	0.861295
AGGTAAAAGACTGATCAGCG	TAF9	Significant in Both and Not Common Essential	No	1.32111	0.979714	0.508287	0.326727	1.11771	0.421113	0.0466763	0.248734	0.000244022	0.534446	0.123118	0.0719805	0.000214316	1.32111	1.23678	0.793672	0.417124	0.382907	0.000209542	0.000182687	0.00018746	0.000176006	0.000145966	0.000134751	0.000168232	0.00017354	-0.366701	-1.03701	-0.11845	-3.6609	-0.263195	-0.615787	-0.65697	-3.71727	-3.77102	-3.63793	-3.34736	-3.33757	-3.92804	-3.77011	-3.39436	-3.34369	-1.30454	-3.56626	0.0136069	0.0193759
TATTTATCCAGGCGCATGAA	ARHGEF7	Not Significant in Both and Not Common Essential	No	0.311516	0.129718	0.423573	0.66048	0.694389	1.78973	0.00179524	0.457987	0.000244022	2.12923	0.00367518	0.166109	0.00214316	0.311516	0.153399	0.398392	0.440671	0.0878802	0.000209542	0.00182687	0.00018746	0.000176006	0.00145966	0.000134751	0.000168232	0.00017354	1.13979	-2.37281	-0.159007	-3.45417	1.21522	-2.06165	-0.599467	-2.51055	-2.86455	-2.3386	-3.37121	-2.69836	-2.02157	-3.47078	-3.41821	-2.70449	-1.10033	-2.86097	0.015374	0.712464
AGCATACAAGTGCCACACGT	VRTN	Not Significant in Both and Not Common Essential	No	0.522497	1.3757	0.125378	0.421583	0.389897	0.368474	0.000179524	0.49352	0.000244022	0.130405	0.000183759	0.452185	0.000214316	0.522497	0.131028	0.220983	0.272476	0.185176	0.000209542	0.000182687	0.00018746	0.000176006	0.000145966	0.000134751	0.000168232	0.00017354	-0.572117	-2.8441	0.0684217	-3.20352	-1.02323	-2.83397	0.0304331	-3.2599	-2.79609	-3.08265	-3.16242	-3.02206	-2.95311	-3.21483	-3.20942	-3.02819	-1.70475	-3.0586	0.0173517	0.147511
TGAATATCGGCTCCACAAAG	SEMA7A	Not Significant in Both and Not Common Essential	No	0.46869	0.116064	0.35919	0.16512	0.508723	0.059219	8.70693	0.00197408	0.000244022	0.117578	3.99124	0.00184565	0.000214316	0.46869	0.051133	0.158734	0.0100917	0.495895	0.000209542	0.00365373	0.00374919	0.000176006	0.00145966	0.00269502	0.000168232	0.00017354	-0.292236	1.38454	-1.92243	-3.31905	0.00562853	1.04578	-1.95165	-3.37543	-2.38743	-1.63793	-0.430027	-3.44986	-1.54445	-1.77011	-1.77806	-3.45599	-1.05311	-2.05673	0.0846466	0.291661
ATGTGGACCTTCTTTAGCCG	TMEM42	Significant in Both and Not Common Essential	No	0.458778	0.26285	0.362578	0.217818	0.48273	0.390407	0.143619	0.0789632	0.402636	0.0919247	0.0238886	0.0276848	0.28504	0.458778	0.354735	0.955518	0.817428	0.0878802	0.000209542	0.000182687	0.00018746	0.000176006	0.000145966	0.000134751	0.000168232	0.00017354	0.17181	-0.40219	-0.440669	-0.0787917	-0.456276	-1.18121	-0.895852	-0.228798	-3.22863	-3.71853	-3.63954	-2.69836	-3.38565	-3.85071	-3.68654	-2.70449	-0.438997	-3.36406	0.0272935	0.0417252
AGTGGATAGTGCTCTGAGCA	TRIM64	Not Significant in Both and Not Common Essential	No	0.424794	0.474496	0.155875	0.0808034	0.813215	0.517618	0.89044	0.000197408	0.00732066	1.33825	1.71998	0.00369131	0.00214316	0.424794	0.345148	0.270782	0.316207	0.116127	0.000209542	0.000182687	0.0018746	0.000176006	0.000145966	0.00134751	0.000168232	0.00017354	0.0377768	0.756828	-2.61206	-2.04566	0.450305	1.04275	-1.34025	-2.57915	-3.21673	-3.17091	-2.22706	-2.81941	-3.37375	-2.30309	-3.27406	-2.82553	-0.786183	-2.90132	0.00454739	0.550418
CTTTGATCAGAAAATCATAG	LACE1	Not Significant in Both and Not Common Essential	No	0.532409	0.706623	0.264309	0.196739	0.53843	0.40576	0.000179524	0.00789632	1.1103	0.788842	0.000183759	0.00184565	0.88941	0.532409	0.699883	0.174296	0.131192	0.059633	0.000209542	0.000182687	0.0018746	0.000176006	0.000145966	0.000134751	0.000168232	0.00017354	-0.240919	-3.16799	-1.39647	0.314311	0.0478023	-3.15786	-2.02774	0.217973	-3.52375	-2.97958	-1.845	-2.52996	-3.68077	-3.11176	-2.892	-2.53609	-1.17636	-2.88736	0.0635543	0.809173
CCTGATGTGTGCTAAAGTCG	IL36A	Not Significant in Both and Not Common Essential	No	0.293108	0.116064	0.162652	0.108909	0.738948	0.00021933	0.000179524	0.0138186	0.475843	0.000213778	0.000183759	0.000184565	0.949419	0.293108	0.0862869	0.24277	0.188378	0.335828	0.000209542	0.000182687	0.00018746	0.000176006	0.000145966	0.000134751	0.000168232	0.00017354	-2.7236	-2.95714	-0.8966	-0.19115	-2.73473	-2.94701	-2.77091	0.108844	-2.61467	-3.12349	-3.00212	-3.28059	-2.77169	-3.25566	-3.04912	-3.28672	-1.88904	-3.04801	0.00619178	0.558341
TGGGGCAGCTCGTAGCTGGG	HADHB	Not Significant in Both and Not Common Essential	No	0.242133	0.0307228	0.484567	0.34078	0.809501	0.00438659	4.90101	0.0098704	0.817474	0.00641335	6.47015	0.0110739	0.996568	0.242133	0.0766995	0.404617	0.279204	0.147513	0.000209542	0.000182687	0.0018746	0.00352011	0.000145966	0.00134751	0.000168232	0.00520619	-0.845334	1.00493	-1.53814	0.00425656	-0.680376	1.12556	-1.48817	0.0902895	-2.56352	-3.34534	-2.17301	-1.62227	-2.72054	-2.47751	-3.22001	-1.45231	-0.290873	-2.44682	0.0153602	0.204921
ATCTTATCACAGACCGTGGT	VN1R4	Not Significant in Both and Not Common Essential	No	0.413466	0.426705	0.704825	0.453202	0.894907	0.263196	4.28165	0.00592224	0.363593	0.652024	4.38448	0.0110739	0.0300042	0.413466	0.869261	0.326806	0.8107	0.0470787	0.000209542	0.00182687	0.0018746	0.00352011	0.000145966	0.000134751	0.00168232	0.00017354	-0.209848	0.78353	-1.88381	-0.391162	0.184136	0.793837	-1.61199	-1.4746	-3.61788	-2.25258	-2.63595	-1.12627	-3.7749	-3.38476	-2.68295	-2.43342	-0.476238	-2.73859	0.033113	0.358628
AAGACTCCCACTAGTCAAAG	ZNF624	Not Significant in Both and Not Common Essential	No	0.266204	0.0443773	0.0643831	0.309161	0.597843	0.214943	1.16511	3.33817	0.0414838	0.0662713	1.0217	6.37858	0.00857263	0.266204	0.00319581	0.0809234	0.158103	0.0533558	0.00209542	0.000182687	0.00018746	0.000176006	0.00583865	0.00134751	0.000168232	0.0017354	0.685162	1.2576	1.03332	-1.15871	0.174165	1.20055	1.31454	-1.84347	-0.18331	-2.64637	-2.92603	-2.48165	0.261731	-1.77854	-2.97303	-1.48778	0.332894	-1.77687	0.0731035	0.155753
GCCCTAGTACCACATTAGCG	NAV3	Significant in Both and Not Common Essential	No	0.787286	0.66566	0.372744	0.235384	0.913474	0.41234	0.000179524	0.00394816	0.602735	0.0705469	0.000183759	0.000184565	0.347192	0.787286	0.632771	0.361043	0.289295	0.718734	0.000209542	0.000182687	0.00018746	0.000176006	0.000145966	0.000134751	0.000168232	0.00017354	-0.207997	-3.31729	-1.77538	-0.18057	-0.974775	-3.30716	-3.10563	-0.420126	-3.47998	-3.29585	-3.18843	-3.61104	-3.63699	-3.42803	-3.23543	-3.61717	-1.66112	-3.43662	0.00484108	0.0277691
GCGGACGTGCCCCACCCGTG	C19orf35	Not Significant in Both and Not Common Essential	No	0.277532	0.191164	0.345635	0.558598	0.668396	0.00021933	1.17947	0.215175	0.0732066	0.00427557	1.59686	0.118122	0.00642947	0.277532	0.169378	0.0591363	0.0840975	0.0659101	0.000209542	0.000182687	0.0018746	0.000176006	0.000145966	0.000134751	0.000168232	0.00017354	-2.94031	0.533069	-0.414308	-0.960484	-1.65041	0.664649	-0.674769	-2.01686	-2.90759	-2.51015	-1.65187	-2.57342	-3.06461	-2.64232	-2.69887	-2.57955	-0.932428	-2.57855	0.0345828	0.970525
TTATCCATGGATAGGAAACG	SLC17A3	Not Significant in Both and Not Common Essential	No	0.253461	0.273091	0.315138	0.316187	0.909761	2.82935	0.0305191	0.578406	0.000244022	2.30026	0.00183759	0.653362	0.000214316	0.253461	0.188553	0.105823	0.999078	0.185176	0.00209542	0.000182687	0.00018746	0.000176006	0.00145966	0.000134751	0.000168232	0.0017354	1.01538	-1.01393	0.262289	-3.5715	0.92547	-2.23425	0.31521	-3.62787	-1.95416	-2.76287	-3.72669	-3.02206	-2.11118	-2.89505	-3.77369	-2.02819	-0.991151	-2.78424	0.104011	0.382942
GCCACAGCTCCTACCCCGCG	BAD	Not Significant in Both and Not Common Essential	No	0.198237	0.197991	0.0576059	0.0772902	0.0371331	0.00021933	0.0233382	1.35422	0.00244022	0.000213778	0.00183759	1.41746	0.00214316	0.198237	0.00319581	0.14006	0.248929	0.0533558	0.000209542	0.000182687	0.00018746	0.000176006	0.00145966	0.000134751	0.000168232	0.00017354	-2.95555	-0.3924	1.24356	-1.18233	-2.96668	-1.49622	1.26339	-1.23871	-1.18331	-2.88461	-3.12317	-2.48165	-0.340329	-3.01678	-3.17017	-2.48778	-0.965617	-2.33597	0.0467916	0.33399
TGTTAGCCAAGAGGACAGCA	RAB32	Not Significant in Both and Not Common Essential	No	0.257709	0.314055	0.0440516	0.0351319	0.0148532	0.513231	0.000179524	0.000197408	0.000244022	0.919247	0.000183759	0.000184565	0.000214316	0.257709	0.000319581	0.000311244	0.339754	0.119266	0.000209542	0.000182687	0.00018746	0.000176006	0.000145966	0.000134751	0.000168232	0.00017354	0.213307	-2.38984	-2.25034	-1.78439	0.466427	-2.37971	-2.27955	-1.84077	-0.18331	-0.231393	-3.25826	-2.83099	-0.340329	-0.363569	-3.30526	-2.83712	-1.53061	-1.66878	0.103682	0.746489
CAGGCCTGGGGGAATATGCA	PRKAA2	Not Significant in Both and Not Common Essential	No	0.242133	0.710037	0.179595	0.140528	0.683249	0.00021933	0.447015	0.556691	0.000244022	0.000213778	0.147007	0.280539	0.000214316	0.242133	0.0543288	0.0746985	0.201834	0.310719	0.000209542	0.000182687	0.00018746	0.000176006	0.000145966	0.000134751	0.000168232	0.00017354	-3.51018	0.396028	0.597851	-3.44715	-3.52132	-0.0869562	0.30023	-3.50352	-2.41376	-2.6116	-3.03209	-3.24684	-2.57078	-2.74378	-3.07909	-3.25297	-1.59688	-2.86886	0.0228647	0.1962
CCACACCAAAACATGAACCG	C7orf33	Not Significant in Both and Not Common Essential	No	0.511169	0.160441	0.159263	0.158094	0.122539	0.0153531	0.000179524	0.185564	1.32992	0.111165	0.000183759	0.22517	0.822973	0.511169	0.348343	0.130722	0.154739	0.511588	0.000209542	0.000182687	0.00018746	0.000176006	0.000145966	0.00134751	0.000168232	0.00017354	-1.01912	-2.94799	0.0695783	1.03555	-0.159347	-2.93787	0.153595	0.827111	-3.22074	-2.85464	-2.91669	-3.46339	-3.37776	-1.98682	-2.96369	-3.46952	-0.622311	-3.03166	0.0160538	0.554344
CGGCCGACTCGAGAAAGAAG	NSFL1C	Significant in Both and Not Common Essential	No	0.675423	0.440359	0.711602	0.221331	0.961747	0.269775	0.58884	0.00197408	0.0122011	0.149645	0.393244	0.00184565	0.0128589	0.675423	0.84689	0.323693	0.245565	0.0502173	0.000209542	0.000182687	0.00018746	0.000176006	0.000145966	0.000134751	0.000168232	0.00017354	-0.212805	-0.0822399	-2.04968	-1.89666	-0.468745	-0.257575	-2.07889	-1.87386	-3.60656	-3.24843	-3.11726	-2.45533	-3.76358	-3.3806	-3.16426	-2.46145	-1.11506	-3.14968	0.0422927	0.0242909
ACCTACAGATAGAACGAGAG	PPM1H	Not Significant in Both and Not Common Essential	No	0.413466	0.116064	0.216869	0.607782	0.181952	0.00021933	0.944298	0.000197408	0.0122011	0.000213778	0.470422	0.00184565	0.000214316	0.413466	0.0543288	0.329918	0.067278	0.467648	0.000209542	0.000182687	0.00018746	0.000176006	0.000145966	0.000134751	0.000168232	0.00017354	-2.7236	0.638912	-3.48838	-1.17356	-2.73473	0.33629	-2.5176	-2.9289	-2.41376	-3.2567	-2.55496	-3.42439	-2.57078	-3.38887	-2.60196	-3.43052	-1.82395	-2.95524	0.0373815	0.418871
GCTGGTCCGACTCTACGCAG	BLK	Not Significant in Both and Not Common Essential	No	0.232221	0.631523	0.105046	0.305648	0.51615	0.484719	0.000179524	0.000197408	0.614936	1.17364	0.000183759	0.00184565	0.77368	0.232221	0.268448	0.0591363	0.100917	0.332689	0.000209542	0.000182687	0.00018746	0.000176006	0.000145966	0.000134751	0.000168232	0.0017354	-0.114899	-2.76726	-3.18986	0.076054	0.269146	-2.75713	-2.21907	0.175785	-3.10759	-2.51015	-2.73106	-3.27651	-3.26461	-2.64232	-2.77806	-2.28264	-1.3159	-2.82412	0.0182538	0.903686
TGATGTCAGGGAAGTTACGG	ADAP2	Not Significant in Both and Not Common Essential	No	0.43329	0.979714	0.877643	0.688586	0.356478	1.97397	0.680397	0.000197408	0.100049	1.36818	0.68542	0.000184565	0.00857263	0.43329	0.127832	0.130722	0.366665	0.429985	0.000209542	0.000182687	0.0018746	0.00176006	0.000145966	0.000134751	0.000168232	0.00017354	0.304241	-0.110556	-3.54259	-0.55182	0.145044	-0.107361	-3.57181	-1.61892	-2.78537	-2.85464	-2.29136	-2.38793	-2.94239	-2.98682	-3.33836	-3.39405	-1.13172	-2.87261	0.0130729	0.825917
GGAGATTCCAGTATCTGCCA	C8A	Not Significant in Both and Not Common Essential	No	0.414882	0.146786	0.196538	0.347806	0.152246	0.0416726	2.30689	0.392842	0.000244022	0.00855114	2.95852	0.287922	0.000214316	0.414882	0.115049	0.594476	0.0874614	0.401738	0.00209542	0.000182687	0.00018746	0.000176006	0.00145966	0.00134751	0.000168232	0.00017354	-0.546834	1.06958	0.0528808	-2.79512	-1.23466	1.17763	-0.0820622	-2.85149	-1.73961	-3.51243	-2.66891	-3.35842	-1.89663	-2.6446	-2.71591	-3.36454	-0.651259	-2.73763	0.02912	0.275622
CAGCTGTTAGGCGATCCATG	MAPK4	Not Significant in Both and Not Common Essential	No	0.252045	0.0273091	0.121989	0.119449	0.0371331	0.00021933	0.00538573	1.07587	0.000244022	0.000213778	0.00183759	0.343292	0.000214316	0.252045	0.268448	0.118273	0.033639	1.07026	0.000209542	0.000182687	0.00018746	0.000176006	0.000145966	0.000134751	0.000168232	0.00017354	-2.09521	-1.35508	0.954577	-2.18233	-2.10634	-1.82207	0.458481	-2.23871	-3.10759	-2.81118	-2.25393	-3.78396	-3.26461	-2.94335	-2.30093	-3.79009	-1.29834	-3.03196	0.13372	0.647709
ACCATGAGGAACTCAGTCTG	TRIM72	Not Significant in Both and Not Common Essential	No	0.499841	0.122891	0.135543	0.649941	0.49387	0.00438659	0.687578	0.116471	0.0146413	0.00427557	0.575165	0.0239935	0.000214316	0.499841	0.559267	0.208533	0.403668	0.2197	0.000209542	0.000182687	0.00018746	0.000176006	0.000145966	0.000134751	0.000168232	0.00017354	-1.44739	0.705245	-0.746656	-1.52803	-1.45853	0.627715	-1.43278	-3.36256	-3.42635	-3.05747	-3.33312	-3.0963	-3.58337	-3.18964	-3.38012	-3.10243	-1.08037	-3.2711	0.00612909	0.197406
AGGAGAAATTAAGGCCACTG	ARL4A	Not Significant in Both and Not Common Essential	No	0.488513	0.0614455	0.111823	0.133501	0.393611	1.48706	0.000179524	0.00394816	2.52807	0.410455	0.000183759	0.00184565	2.72395	0.488513	0.0159791	0.0591363	0.151375	0.0376629	0.000209542	0.000182687	0.00018746	0.000176006	0.00291933	0.00134751	0.000168232	0.0017354	1.38384	-2.79441	-1.52909	0.807722	0.824775	-2.78428	-1.85934	0.840132	-1.88228	-2.51015	-2.90715	-2.33039	-0.738269	-1.64232	-2.95415	-1.33651	-0.638831	-2.03765	0.162671	0.164502
AAGTTTCATGAATGTGTCGG	FBXL21	Not Significant in Both and Not Common Essential	No	0.280364	0.215059	0.328692	0.832627	0.53843	0.127211	0.000179524	0.744228	0.0902882	0.0213778	0.000183759	0.393124	0.0471495	0.280364	0.105462	0.554014	0.0639141	0.0784645	0.000209542	0.000182687	0.00018746	0.000176006	0.000145966	0.000134751	0.000168232	0.00017354	-0.228033	-3.26267	-0.0487445	-0.775498	-1.00259	-3.25254	-0.325921	-1.05765	-2.70182	-3.48181	-2.53269	-2.64915	-2.85884	-3.61399	-2.57969	-2.65527	-1.24421	-2.88416	0.0804587	0.106947
ACAGAGCTTTCTCCGCATGT	C7orf71	Not Significant in Both and Not Common Essential	No	0.269036	0.129718	1.00641	0.667507	0.52729	0.583417	0.944298	0.00592224	2.55735	0.991932	0.455722	0.00184565	2.10244	0.269036	0.249273	0.149397	0.218653	0.298165	0.000209542	0.000182687	0.00018746	0.000176006	0.000145966	0.00134751	0.00168232	0.00347079	0.652979	-0.0276659	-2.05197	0.685741	0.883482	-0.344075	-2.55831	0.600674	-3.0754	-2.91263	-3.06685	-3.22893	-3.23242	-2.04481	-2.11385	-1.93403	-0.269893	-2.70112	0.000748047	0.26007
CTCACCTGCTACGACAGTCG	PROM1	Not Significant in Both and Not Common Essential	No	0.33134	0.116064	0.599779	0.161607	0.271072	0.00438659	3.32658	0.323749	0.000244022	0.000213778	2.32087	0.251009	0.000214316	0.33134	0.565659	0.298794	0.497857	0.229116	0.000209542	0.000182687	0.00018746	0.00352011	0.00145966	0.000134751	0.000168232	0.00017354	-1.42257	0.744007	0.301748	-3.04566	-2.73473	0.58766	0.191229	-3.10203	-3.43128	-3.21366	-3.4242	-1.8135	-2.5883	-3.34584	-3.4712	-3.12066	-1.06004	-3.05108	0.00372227	0.333192
ACCCTCATGACTAAACTACA	DYNC1LI2	Not Significant in Both and Not Common Essential	No	0.910476	0.385741	0.206703	0.16512	0.219085	0.969437	0.000179524	0.00394816	0.702784	1.49645	0.000183759	0.000184565	0.850834	0.910476	1.23997	0.164959	0.171559	0.156929	0.000209542	0.000182687	0.00018746	0.000176006	0.00145966	0.00134751	0.000168232	0.00017354	0.400224	-3.06122	-1.6214	0.506209	0.588766	-3.0511	-2.95165	0.589232	-3.77214	-2.95567	-2.9615	-2.95018	-2.92916	-2.08784	-3.0085	-2.9563	-1.07512	-2.95266	0.0823984	0.622846
GTACTGATCAACACGCCCCC	HYI	Not Significant in Both and Not Common Essential	No	0.815605	0.498391	0.664162	1.7847	0.486443	0.00021933	0.00179524	1.30487	0.968768	0.000213778	0.0385893	1.17753	0.80797	0.815605	0.492155	0.656724	0.248929	0.282472	0.000209542	0.000182687	0.00018746	0.00176006	0.000145966	0.00134751	0.000168232	0.00017354	-3.35647	-2.56815	-0.135998	0.299188	-3.36761	-1.23581	-0.180593	0.220363	-3.37083	-3.55568	-3.12317	-2.20545	-3.52785	-2.68785	-3.17017	-3.21158	-1.29063	-3.10657	0.00999799	0.349989
AATCACATTTCCCATTCAGA	SLC25A51	Not Significant in Both and Not Common Essential	No	0.45453	0.774896	0.0881031	0.389964	0.207945	0.138178	0.00179524	0.232942	0.592974	0.000213778	0.000183759	0.155035	0.293613	0.45453	0.0319581	0.10271	0.0807336	0.0345244	0.000209542	0.000182687	0.00018746	0.000176006	0.000145966	0.000134751	0.000168232	0.00017354	-0.748805	-1.69087	-0.223777	0.455087	-3.55928	-2.68074	-0.400595	0.149827	-2.18331	-2.74991	-2.63415	-2.2926	-2.34033	-2.88208	-2.68115	-2.29873	-1.08739	-2.50778	0.151704	0.177657
CAGTCCAGGACACTTACTGG	COL23A1	Not Significant in Both and Not Common Essential	No	0.47577	0.686141	0.633665	0.467255	0.148532	0.00021933	1.06996	0.104626	0.21962	0.00213778	1.18524	0.0110739	0.0664379	0.47577	0.0735037	0.361043	0.0807336	0.310719	0.000209542	0.000182687	0.00018746	0.000176006	0.000145966	0.00134751	0.000168232	0.00017354	-3.49532	0.227508	-0.649914	0.169852	-2.50645	0.271947	-1.62525	-0.349404	-2.54504	-3.29585	-2.63415	-3.24684	-2.70206	-2.42803	-2.68115	-3.25297	-0.994629	-2.84826	0.0307093	0.469043
AAGCGATAACACTTGTCCTG	MASTL	DepMap Common Essential	Yes	0.361075	0.744173	0.298195	0.151067	0.0705529	0.300482	0.414701	6.12557	0.00244022	0.211641	0.253587	3.00657	0.00214316	0.361075	0.0830911	0.168072	0.158103	0.0564944	0.00209542	0.00182687	0.00374919	0.00176006	0.000145966	0.000134751	0.000168232	0.00017354	-0.393855	0.143235	1.60798	-1.46109	-0.546074	-0.0703734	1.2989	-1.51746	-1.59828	-1.96379	-1.625	-1.50648	-2.7553	-3.09596	-2.97303	-2.51261	-0.117342	-2.25381	0.0371268	0.256461
GCGGTTTCCCGAACGGAGCG	PAIP1	Not Significant in Both and Not Common Essential	No	0.141598	0.0785137	0.138932	0.0140528	0.0891194	0.00021933	1.63188	0.000197408	0.000244022	0.00213778	1.40208	0.00184565	0.000214316	0.141598	0.105462	0.12761	0.00033639	0.0376629	0.000209542	0.000182687	0.00018746	0.00176006	0.000145966	0.000134751	0.000168232	0.00017354	-2.55385	1.06989	-1.8524	-2.56254	-1.56498	1.00397	-0.881614	-2.61892	-2.70182	-2.84418	-0.253934	-1.33039	-2.85884	-2.97635	-0.300934	-2.33651	-1.24506	-1.95037	0.0392085	0.287754
TGCAGGCTGTAATATCCCTG	DERA	Not Significant in Both and Not Common Essential	No	0.580552	0.310641	0.31175	0.467255	0.237652	0.0548324	0.319553	2.57815	0.000244022	0.00213778	0.207647	4.44618	0.00428632	0.580552	0.361127	0.756322	0.555043	0.081603	0.000209542	0.000182687	0.0018746	0.00176006	0.000145966	0.00134751	0.000168232	0.0017354	-0.753222	0.0107364	0.741754	-2.98851	-2.1623	-0.176481	0.978433	-1.74386	-3.23639	-3.617	-2.47142	-1.66618	-3.39341	-2.74917	-3.51842	-1.67231	-0.76168	-2.79054	0.0154079	0.365942
ACAAACACAAAAGAACCCCA	C12orf56	Not Significant in Both and Not Common Essential	No	0.460194	0.136546	0.0609945	0.0948562	0.185665	0.890478	0.000179524	0.000197408	0.000244022	0.519482	0.000183759	0.000184565	0.000214316	0.460194	0.108658	0.448191	0.339754	0.059633	0.000209542	0.000182687	0.00018746	0.000176006	0.000145966	0.000134751	0.000168232	0.00017354	0.814344	-2.53117	-2.6817	-2.8813	0.580292	-2.52104	-2.71092	-2.93768	-2.71479	-3.38976	-3.25826	-2.52996	-2.87181	-3.52193	-3.30526	-2.53609	-1.85865	-3.01598	0.0283668	0.93745
TTGAAGAGAGAAACGCACTG	WDR93	Not Significant in Both and Not Common Essential	No	0.276116	0.430119	0.132155	0.122962	0.534716	0.00657989	0.543958	0.487598	0.000244022	0.000213778	0.10658	0.265774	0.000214316	0.276116	0.306798	0.10271	0.144648	0.163206	0.000209542	0.000182687	0.00018746	0.000176006	0.000145966	0.000134751	0.000168232	0.00017354	-1.81537	0.614482	0.598291	-3.34069	-3.30363	-0.0934079	0.334742	-3.39707	-3.16558	-2.74991	-2.8874	-2.96721	-3.3226	-2.88208	-2.9344	-2.97334	-1.30033	-2.98532	0.00730004	0.309022
TTGGGTCCCTGGATGAAAGG	C1QL2	Not Significant in Both and Not Common Essential	No	0.266204	0.242368	0.559116	0.112422	0.0705529	0.00021933	0.0897621	0.000197408	1.00537	0.000213778	0.0569652	0.000184565	1.49592	0.266204	0.0575246	0.301906	0.0706419	0.489618	0.000209542	0.000182687	0.00018746	0.000176006	0.000145966	0.00134751	0.000168232	0.00017354	-3.04338	-0.794409	-2.75549	1.15381	-3.05451	-0.991892	-2.7847	1.32639	-2.43858	-3.21816	-2.57615	-3.44433	-2.5956	-2.35034	-2.62315	-3.45046	-1.36802	-2.8371	0.0418922	0.725227
TCAGTCTGTACCATAAAGGT	ATG2B	Not Significant in Both and Not Common Essential	No	0.383731	0.208232	0.247366	0.755336	0.148532	1.4739	0.536778	0.0098704	0.000244022	0.79098	0.191109	0.000184565	0.000214316	0.383731	0.102266	0.317469	0.326298	0.313858	0.000209542	0.000182687	0.00018746	0.000176006	0.000145966	0.000134751	0.000168232	0.0017354	0.849921	0.336455	-1.88381	-2.78439	0.579618	-0.112059	-3.61199	-2.84077	-2.68846	-3.23999	-3.24071	-3.25121	-2.84548	-3.37217	-3.28771	-2.25733	-1.18338	-3.02288	0.00395467	0.904542
AAGGTTTCGCGAGCGTCTAG	DNAJC13	Not Significant in Both and Not Common Essential	No	0.530993	0.160441	0.294807	1.02937	0.330484	0.0021933	0.0736049	0.481676	0.261104	0.000213778	0.000183759	0.45034	0.137162	0.530993	0.230098	0.199196	0.565135	0.57436	0.000209542	0.000182687	0.00018746	0.000176006	0.000145966	0.000134751	0.000168232	0.00017354	-1.86422	-0.602631	-0.329816	-0.102337	-2.87535	-3.20529	-0.359031	-0.381917	-3.04064	-3.03757	-3.47924	-3.51366	-3.19766	-3.16975	-3.52624	-3.51978	-1.21507	-3.31057	0.00758961	0.132833
CTGGATCAGCCCTTTCACGA	SIGLECL1	Not Significant in Both and Not Common Essential	No	0.286028	0.143373	0.437127	0.446175	0.0668396	0.0285129	0.000179524	0.570509	0.000244022	0.147507	0.000183759	0.658899	0.000214316	0.286028	1.02905	0.164959	0.0370029	0.0784645	0.000209542	0.000182687	0.00018746	0.000176006	0.000145966	0.000134751	0.000168232	0.00017354	-0.701426	-3.38649	0.106757	-2.4376	0.0123453	-3.37636	0.169314	-2.49398	-3.69117	-2.95567	-2.29533	-2.64915	-3.84818	-3.08784	-2.34233	-2.65527	-1.51343	-2.94062	0.155517	0.436458
TCAGTCCGTAATAATTGCTA	APOOL	Not Significant in Both and Not Common Essential	No	0.590464	0.194577	0.50151	0.40753	0.542143	0.00021933	0.000179524	1.27131	0.270864	0.00213778	0.00367518	1.43223	0.102872	0.590464	0.805344	0.217871	0.248929	0.477064	0.000209542	0.00182687	0.00018746	0.000176006	0.000145966	0.000134751	0.000168232	0.00017354	-2.94799	-3.44616	0.494092	-0.301363	-1.95913	-2.135	0.545853	-0.721817	-3.58471	-2.07649	-3.12317	-3.43305	-3.74173	-3.20867	-3.17017	-3.43918	-1.30894	-3.22214	0.0129171	0.790245
AGCACAGCAATACAACAGAG	TMED7-TICAM2	Not Significant in Both and Not Common Essential	No	0.630112	0.174096	0.369355	0.137015	0.308205	0.850999	0.00179524	0.000197408	0.000244022	0.549411	0.000183759	0.00184565	0.000214316	0.630112	0.827715	0.460641	0.154739	0.112989	0.000209542	0.000182687	0.00018746	0.000176006	0.000145966	0.000134751	0.000168232	0.00017354	0.68914	-2.31332	-2.8414	-3.10141	0.499109	-3.3032	-1.87062	-3.15779	-3.59661	-3.40165	-2.91669	-2.80751	-3.75363	-3.53383	-2.96369	-2.81364	-1.92494	-3.22341	0.0331785	0.335003
TGTGCCGGCTATACCCCACA	CMKLR1	Not Significant in Both and Not Common Essential	No	0.339835	0.163855	0.606556	0.386451	0.144819	0.00021933	1.67137	0.00197408	0.312348	0.00855114	2.19408	0.00553696	0.499356	0.339835	0.0958743	2.02308	0.689599	1.0577	0.000209542	0.00182687	0.00018746	0.00176006	0.000145966	0.000134751	0.000168232	0.00017354	-2.87336	0.440202	-2.29173	0.333813	-1.28244	0.558382	-1.84382	0.537585	-2.66043	-3.04431	-3.56569	-2.77884	-2.81745	-4.17648	-3.61269	-3.78496	-0.802671	-3.30511	0.0672478	0.437377
TCTGGAAGCCCAAGCCAAGG	HIATL1	Not Significant in Both and Not Common Essential	No	0.17275	0.744173	0.0745488	0.0351319	0.612696	1.06375	2.25123	0.00394816	0.00976088	0.0555824	1.53071	0.000184565	0.000214316	0.17275	0.0127832	0.121385	0.299387	0.081603	0.00209542	0.000182687	0.00018746	0.000176006	0.000145966	0.000134751	0.000168232	0.0017354	0.155166	1.47998	-0.949307	-1.79776	-1.12674	1.31245	-2.27955	-3.45619	-0.785368	-2.82246	-3.20332	-2.66618	-1.94239	-2.95463	-3.25032	-1.67231	-0.832743	-2.41212	0.0466666	0.428402
TCATATATAATCCAATTAGG	CLEC7A	Not Significant in Both and Not Common Essential	No	0.259125	0.129718	0.128766	0.0597243	0.0556996	0.127211	1.80601	0.000197408	0.000244022	0.0342046	1.35246	0.000184565	0.000214316	0.259125	0.0351539	0.099598	0.124464	0.0313858	0.00209542	0.000182687	0.00018746	0.000176006	0.000145966	0.000134751	0.000168232	0.00017354	-0.00847558	1.14692	-2.48079	-2.35842	-0.578916	1.02132	-2.51	-2.4148	-1.2247	-2.73654	-2.82214	-2.25121	-2.38172	-2.86872	-2.86914	-2.25733	-1.02289	-2.42644	0.0573645	0.303662
GATGAGTGTAAGGGACACCA	ZNF138	Not Significant in Both and Not Common Essential	No	0.259125	0.238955	0.040663	0.158094	0.144819	0.00021933	0.85274	0.0572483	0.000244022	0.00427557	0.485123	0.00184565	0.000214316	0.259125	0.159791	0.0560239	0.158103	0.210285	0.000209542	0.000182687	0.00018746	0.000176006	0.000145966	0.000134751	0.000168232	0.00017354	-3.03722	1.32162	-0.441153	-2.7734	-1.74732	1.07665	-1.93277	-2.82977	-2.88228	-2.48667	-2.92603	-3.07728	-3.0393	-2.61884	-2.97303	-3.08341	-1.29542	-2.88586	0.00753806	0.955374
CAAACTCGCCGCGGGCCGTG	TMEM151A	Not Significant in Both and Not Common Essential	No	0.171334	0.256023	0.31175	0.354832	0.434457	0.021933	0.0197477	1.80036	0.141533	0.000213778	0.000183759	1.05387	0.0792968	0.171334	0.872456	0.205421	0.0235473	0.188315	0.000209542	0.000182687	0.0018746	0.000176006	0.000145966	0.000134751	0.000168232	0.00017354	-1.06718	-1.19829	0.705337	-0.487089	-3.07832	-3.22956	0.472764	-0.738691	-3.61947	-3.05094	-1.09903	-3.02936	-3.77649	-3.18311	-2.14603	-3.03549	-1.07763	-2.86749	0.121067	0.738017
TACCACTAGTCCCAGAACGA	RUNX1T1	Not Significant in Both and Not Common Essential	No	0.648519	0.392569	0.115212	0.291595	0.141106	0.366281	0.000179524	0.000197408	0.0512446	0.970554	0.000183759	0.000184565	0.0107158	0.648519	0.54968	0.136947	0.117736	0.260502	0.000209542	0.000182687	0.00018746	0.000176006	0.000145966	0.000134751	0.000168232	0.00017354	-0.0301016	-2.80738	-3.16942	-0.439897	0.393104	-2.79725	-3.19863	-1.11952	-3.41884	-2.87484	-2.798	-3.17028	-3.57586	-3.00702	-2.845	-3.17641	-1.64614	-3.10828	0.0344288	0.379037
CAGGAGTCATCTTTCCCGTG	H2AFY	Not Significant in Both and Not Common Essential	No	0.270452	0.631523	0.257532	0.411044	0.415891	1.74586	0.000179524	0.280319	0.000244022	1.23564	0.000183759	0.0516783	0.000214316	0.270452	0.0830911	0.171184	0.0538224	0.138097	0.00209542	0.000182687	0.00018746	0.000176006	0.000145966	0.000134751	0.000168232	0.00017354	0.44162	-3.15671	-0.166236	-3.23155	0.291503	-3.14658	-0.90058	-3.28792	-1.59828	-2.97176	-2.45805	-2.89466	-2.7553	-3.10393	-2.50505	-2.90078	-1.64456	-2.64848	0.0194474	0.947722
AAAAACTCTGGGAAATGACT	SPHAR	Not Significant in Both and Not Common Essential	No	0.261957	0.160441	0.433738	0.112422	0.096546	0.0021933	0.0107715	2.07871	0.126891	0.000213778	0.000183759	0.854538	0.0364337	0.261957	0.725449	0.0529114	0.252292	0.0721873	0.000209542	0.000182687	0.0018746	0.000176006	0.000145966	0.000134751	0.000168232	0.00017354	-1.86422	-1.60495	1.26694	0.118697	-2.87535	-3.37298	0.88088	-0.423231	-3.53934	-2.46184	-2.12899	-2.61293	-3.69636	-2.59402	-3.17599	-2.61906	-0.984276	-2.85357	0.0878324	0.533677
GCTGGACATAGTCCCCAATG	HARS	Not Significant in Both and Not Common Essential	No	0.199653	0.109236	0.267698	0.101883	0.772368	0.00438659	0.0233382	0.714617	0.0512446	0.000213778	0.00183759	2.27015	0.000214316	0.199653	0.13742	0.333031	0.339754	0.0251086	0.000209542	0.00182687	0.00018746	0.000176006	0.000145966	0.000134751	0.000168232	0.00017354	-1.39624	-1.05958	0.845972	-1.17818	-2.7084	-2.1634	1.34795	-3.55677	-2.81678	-2.26078	-3.25826	-2.1543	-2.9738	-3.39295	-3.30526	-2.16042	-1.23358	-2.79032	0.0259135	0.770069
GACAATCCAGAATTTAACAT	IFIT5	Not Significant in Both and Not Common Essential	No	0.358243	0.0443773	0.294807	0.316187	0.096546	0.00021933	0.00359049	2.81899	0.00488044	0.00213778	0.00367518	7.98615	0.0107158	0.358243	0.306798	0.152509	0.699691	0.376629	0.000209542	0.00182687	0.00018746	0.00176006	0.00291933	0.000134751	0.000168232	0.00347079	-2.30606	-1.91438	0.95015	-1.29628	-1.3172	-1.90426	1.40239	-0.95471	-3.16558	-1.92159	-3.572	-2.33039	-2.02157	-3.05376	-3.619	-2.03549	-0.917543	-2.71492	0.0134478	0.299798
AAAGCACATGAAGCCGAGCG	RNASEH1	Not Significant in Both and Not Common Essential	No	0.266204	0.471082	0.0711602	0.526979	0.319345	0.241263	0.201067	3.67574	0.00732066	0.0342046	0.0422645	2.85892	0.000214316	0.266204	0.0607204	0.883932	0.124464	0.241671	0.000209542	0.000182687	0.00018746	0.000176006	0.00145966	0.00134751	0.00168232	0.0017354	-0.290606	0.451104	0.843551	-1.63971	-1.13901	-0.226261	0.734409	-3.17321	-2.46206	-3.68471	-2.82214	-3.1377	-1.61908	-2.81689	-1.86914	-2.14382	-0.554966	-2.56944	0.0991904	0.333738
ACATCCTTACAGCGTCGTAG	KRT3	Not Significant in Both and Not Common Essential	No	0.739142	0.829514	0.762431	0.762363	0.467877	1.0133	0.170548	0.264527	0.0463642	1.443	0.0294014	0.0203022	0.00428632	0.739142	0.108658	0.248995	0.393576	0.348382	0.000209542	0.000182687	0.00018746	0.00176006	0.000145966	0.000134751	0.000168232	0.00017354	0.0869143	-0.650354	-0.459692	-1.00395	0.240443	-1.41383	-1.57462	-2.03805	-2.71479	-3.13448	-3.32212	-2.29653	-2.87181	-3.26666	-3.36912	-3.30266	-0.851642	-3.03477	0.024869	0.132884
AAGCAGTGTTCCAATGCCAG	TMEM211	Not Significant in Both and Not Common Essential	No	0.345499	0.341364	0.0677716	0.168633	0.0668396	0.00021933	0.165162	2.50906	0.00244022	0.000213778	0.299527	4.52554	0.00428632	0.345499	0.348343	0.354818	0.0201834	0.081603	0.000209542	0.00182687	0.00018746	0.00176006	0.00145966	0.000134751	0.00168232	0.00017354	-3.19212	0.386862	1.17257	-1.4376	-3.20325	0.645388	1.42873	-1.19295	-3.22074	-2.2883	-2.03209	-1.66618	-2.37776	-3.42047	-1.07909	-2.67231	-0.674048	-2.34461	0.0360603	0.255267
TTCACTGTGTCACTGGACAA	SUSD2	Not Significant in Both and Not Common Essential	No	0.325676	0.0819273	0.301584	0.291595	0.363904	0.0021933	0.000179524	0.67711	0.00732066	0.000213778	0.000183759	2.02653	0.00214316	0.325676	0.051133	0.183634	0.484402	0.0470787	0.000209542	0.000182687	0.00018746	0.000176006	0.00145966	0.000134751	0.000168232	0.00017354	-1.57233	-3.22529	0.365879	-1.69644	-2.58347	-3.21516	0.841973	-2.22993	-2.38743	-3.00225	-3.4123	-2.4273	-1.54445	-3.13442	-3.4593	-2.43342	-1.66434	-2.72511	0.0601282	0.804708
CAGGCACATCACCAGCCTGG	PF4V1	Not Significant in Both and Not Common Essential	No	0.348331	0.215059	0.264309	0.151067	0.300778	0.651409	0.0143619	0.00592224	1.17619	0.168885	0.00367518	0.000184565	0.945133	0.348331	0.134224	0.152509	0.65596	0.210285	0.000209542	0.000182687	0.00018746	0.000176006	0.000145966	0.000134751	0.000168232	0.0017354	0.481296	-1.2649	-1.40668	0.592231	-0.104967	-1.85683	-2.91302	0.497247	-2.80656	-2.92159	-3.54397	-3.07728	-2.96358	-3.05376	-3.59097	-2.08341	-0.746954	-3.00514	0.0359751	0.528979
CATTCATGCACCGAACTGCG	KLHDC9	Not Significant in Both and Not Common Essential	No	0.259125	0.433532	0.552339	0.126475	0.0519863	0.203977	2.97472	0.00592224	0.000244022	0.207365	4.06291	0.00738262	0.00214316	0.259125	0.524113	0.0684736	0.0437307	0.0125543	0.000209542	0.000182687	0.0018746	0.000176006	0.00291933	0.000134751	0.000168232	0.0017354	-0.32744	0.73124	-1.32952	-2.32846	-0.320286	0.866631	-1.23379	-1.38483	-3.39815	-2.57382	-1.36788	-1.85327	-2.25414	-2.70599	-2.41488	-0.859393	-0.665808	-2.17844	0.132489	0.300204
CCAGAATCTCATCCATGTCG	SNCAIP	Not Significant in Both and Not Common Essential	No	0.382315	0.59056	0.420184	0.0878298	0.326771	0.210556	0.312372	0.000197408	0.517327	0.0106889	0.0128631	0.000184565	0.32576	0.382315	0.115049	0.516665	0.0269112	0.238532	0.000209542	0.000182687	0.00018746	0.000176006	0.000145966	0.000134751	0.000168232	0.00017354	-0.447896	-0.128767	-2.64828	0.199522	-1.74233	-1.51409	-2.67749	-0.00134575	-2.73961	-3.4515	-2.15702	-3.13202	-2.89663	-3.58368	-2.20402	-3.13815	-1.12009	-2.91283	0.0445477	0.113339
TTGTGTCTATGAGTGGACCA	ABHD12B	Not Significant in Both and Not Common Essential	No	0.43329	0.819273	0.193149	0.667507	0.267358	3.4698	0.000179524	0.00197408	0.00244022	1.01545	0.000183759	0.00184565	0.000214316	0.43329	0.159791	0.401504	0.339754	0.222839	0.000209542	0.000182687	0.00018746	0.000176006	0.000145966	0.000134751	0.00168232	0.0017354	0.626876	-3.03177	-2.52909	-2.03966	0.0932299	-3.02164	-2.55831	-3.09604	-2.88228	-3.34198	-3.25826	-3.10246	-3.0393	-3.47416	-2.30526	-2.10859	-1.94455	-2.93904	0.0040043	0.854166
AAGCCAATCCTGCTTGTGCA	TDP1	Not Significant in Both and Not Common Essential	No	0.378067	0.293573	0.115212	0.091343	0.141106	0.00021933	0.000179524	0.000197408	0.151294	0.000213778	0.00183759	0.000184565	1.23446	0.378067	0.124637	0.441966	0.0807336	0.172622	0.000209542	0.000182687	0.00018746	0.000176006	0.000145966	0.000134751	0.000168232	0.00017354	-3.12662	-2.80738	-2.66531	0.0302762	-3.13775	-1.79725	-2.69453	0.941932	-2.77438	-3.38368	-2.63415	-2.99157	-2.9314	-3.51586	-2.68115	-2.9977	-1.90708	-2.98873	0.0289611	0.856545
AGTCTAACACGAATACAGAC	SPICE1	Not Significant in Both and Not Common Essential	No	0.423378	0.361846	0.166041	0.101883	0.0556996	0.00438659	0.000179524	1.39173	0.000244022	0.000213778	0.00735035	1.30672	0.000214316	0.423378	0.399476	0.202308	0.228745	0.0721873	0.000209542	0.000182687	0.00018746	0.000176006	0.00145966	0.000134751	0.000168232	0.00017354	-1.9164	-2.96609	1.13545	-2.35842	-3.22856	-1.35391	1.10808	-2.4148	-3.28022	-3.04431	-3.08644	-2.61293	-2.43724	-3.17648	-3.13344	-2.61906	-1.49933	-2.92377	0.0154868	0.627017
CGTGCTCCCTGAGTACTACG	SPDYE3	Not Significant in Both and Not Common Essential	No	0.464442	1.09236	0.369355	0.231871	0.404751	0.271969	1.80242	0.00197408	0.000244022	0.502379	1.65015	0.00369131	0.00214316	0.464442	0.27484	0.550901	1.11345	0.166345	0.000209542	0.000182687	0.00018746	0.000176006	0.00145966	0.000134751	0.00168232	0.00017354	-0.603846	0.688412	-2.06988	-3.21976	-0.337334	0.650079	-1.79807	-2.27613	-3.11781	-3.47937	-3.77376	-2.97548	-2.27483	-3.61154	-2.82076	-2.98161	-1.12082	-3.1294	0.03548	0.957515
AAAACGTCCGATAAAAGTCT	GINS3	DepMap Common Essential	Yes	0.320012	0.0989955	0.555727	0.379425	0.107686	0.0021933	0.745026	0.000197408	0.000244022	0.000213778	0.63213	0.00738262	0.000214316	0.320012	0.0383497	0.0248995	0.00033639	0.000313858	0.000209542	0.000182687	0.00018746	0.000176006	0.000145966	0.000134751	0.000168232	0.00017354	-1.65452	0.12731	-3.28376	-2.64473	-2.66565	0.0559449	-1.71092	-2.7011	-2.26249	-2.13448	-0.253934	-0.251206	-2.41951	-2.26666	-0.300934	-0.257334	-1.80968	-1.26832	0.279156	0.420682
ATAAAAAAGGAACTGAATTG	RDX	Significant in Both and Not Common Essential	No	0.928884	1.36204	0.555727	0.231871	0.501297	0.0021933	0.771954	0.00592224	0.000244022	0.00213778	0.604566	0.000184565	0.000214316	0.928884	0.338756	0.603813	0.390212	0.326412	0.000209542	0.000182687	0.00018746	0.000176006	0.000145966	0.000134751	0.000168232	0.00017354	-2.79309	0.14273	-1.59276	-3.31267	-2.80423	0.0365822	-3.0991	-3.36904	-3.20862	-3.51919	-3.31839	-3.26824	-3.36564	-3.65137	-3.36539	-3.27437	-2.09895	-3.3714	0.0106055	0.0493843
TACCGGCAGGACGCCTACGA	HLA-A	Not Significant in Both and Not Common Essential	No	0.379483	0.0477909	0.274475	0.172146	0.241365	0.00021933	2.05017	0.000197408	0.302587	0.000213778	2.24186	0.000184565	0.08144	0.379483	0.115049	0.373492	2.07216	0.182038	0.000209542	0.000182687	0.0018746	0.00176006	0.000145966	0.000134751	0.000168232	0.00017354	-2.33825	0.873287	-2.94053	0.098176	-2.34938	0.912106	-2.96975	-0.471837	-2.73961	-3.31057	-3.04351	-2.01463	-2.89663	-3.44275	-4.09051	-3.02076	-1.14827	-3.06987	0.163174	0.331141
GTTGACGCCAGTGACGAAGG	MPO	Not Significant in Both and Not Common Essential	No	0.270452	0.648591	0.216869	0.83614	0.252505	0.00438659	0.368025	0.882414	0.204979	0.00213778	0.773624	0.616449	0.0514358	0.270452	0.316385	0.227208	0.0100917	0.0847416	0.000209542	0.000182687	0.00018746	0.000176006	0.000145966	0.000134751	0.00168232	0.00017354	-2.16984	0.22968	0.0233934	-0.0905606	-2.48201	0.552332	-0.132382	-0.691004	-3.17894	-3.09472	-1.73106	-2.68257	-3.33596	-3.22689	-0.778056	-2.6887	-0.595049	-2.58961	0.0349884	0.653735
GAGAGGATGGAGTAGCCCGT	HECA	Not Significant in Both and Not Common Essential	No	0.254877	0.467669	0.128766	0.674533	0.103973	2.28761	0.0143619	0.73041	0.00244022	2.82615	0.145169	1.15723	0.00214316	0.254877	0.0415455	0.171184	0.067278	0.260502	0.00209542	0.000182687	0.00018746	0.000176006	0.00145966	0.00269502	0.000168232	0.00017354	0.689443	-0.952589	0.0345635	-1.62949	0.781257	0.0520727	0.234416	-1.68587	-1.29725	-2.97176	-2.55496	-3.17028	-1.45427	-1.8029	-2.60196	-3.17641	-0.309524	-2.37873	0.0258627	0.200728
TCCAACTTCAAAGAGCACAG	TWSG1	Not Significant in Both and Not Common Essential	No	0.189741	0.324296	0.0643831	0.115935	0.0148532	0.146951	0.000179524	0.000197408	0.466082	0.111165	0.000183759	0.000184565	0.657949	0.189741	0.0766995	0.0404617	0.00033639	0.0784645	0.000209542	0.000182687	0.00018746	0.000176006	0.000145966	0.000134751	0.000168232	0.00017354	-0.343769	-2.55465	-2.76885	1.49664	-0.464974	-2.54452	-2.79807	1.64637	-2.56352	-2.34534	-0.253934	-2.64915	-2.72054	-2.47751	-0.300934	-2.65527	-1.04148	-1.99577	0.0713216	0.771781
TCTCCGCACCAGGTCGCTAG	LHX1	Not Significant in Both and Not Common Essential	No	0.00141598	0.0204818	0.115212	0.0210792	0.0297065	0.0021933	0.533187	0.000197408	0.000244022	0.000213778	0.84529	0.000184565	0.000214316	0.00141598	0.131028	0.00933731	0.00033639	0.0502173	0.000209542	0.000182687	0.00018746	0.000176006	0.000145966	0.000134751	0.000168232	0.00017354	-0.97027	0.665382	-2.02849	-2.08542	-1.98141	0.865508	-2.0577	-2.1418	-2.79609	-1.70851	-0.253934	-2.45533	-2.95311	-1.84069	-0.300934	-2.46145	-1.21677	-1.84626	0.198604	0.288548
GAGTGGGGCCAAAGGCTGCG	RPS3	DepMap Common Essential	Yes	0.390811	0.283332	0.345635	0.33024	0.293351	1.12516	0.0305191	0.00197408	0.043924	0.173161	0.00551276	0.000184565	0.000214316	0.390811	0.367518	0.273894	0.302751	0.119266	0.000209542	0.000182687	0.00018746	0.000176006	0.000145966	0.000134751	0.000168232	0.00017354	0.598919	-1.05405	-2.22346	-0.824686	-0.213846	-1.79725	-3.25268	-3.13633	-3.24401	-3.17587	-3.20818	-2.83099	-3.40103	-3.30805	-3.25518	-2.83712	-1.48792	-3.15755	0.00370242	0.297042
ACATAGGGCTTAATCAACAC	ZFP28	Not Significant in Both and Not Common Essential	No	0.508337	0.392569	0.393076	0.267003	0.285925	0.0197397	0.741435	0.000197408	0.000244022	0.000213778	0.617429	0.000184565	0.000214316	0.508337	0.281231	0.0964856	0.21529	0.112989	0.000209542	0.000182687	0.00018746	0.000176006	0.000145966	0.000134751	0.000168232	0.00017354	-1.29858	0.275597	-3.13115	-3.06882	-3.26395	0.19611	-3.16037	-3.1252	-3.12779	-2.72275	-3.06012	-2.80751	-3.28481	-2.85493	-3.10712	-2.81364	-2.07205	-2.97233	0.031149	0.133945
CTGGTGCACCTGCTTCATGG	FAM136A	DepMap Common Essential	Yes	0.453114	0.631523	0.159263	0.435636	0.215372	0.00657989	0.156186	0.513261	0.000244022	0.000213778	0.41897	0.282385	0.000214316	0.453114	0.134224	0.308131	0.962075	0.348382	0.000209542	0.000182687	0.00018746	0.000176006	0.000145966	0.000134751	0.000168232	0.00017354	-1.98217	-0.00847279	0.0712145	-2.94576	-3.47043	0.420068	-0.188282	-3.00213	-2.80656	-3.22703	-3.7103	-3.29653	-2.96358	-3.3592	-3.7573	-3.30266	-1.38825	-3.30289	0.0345122	0.10055
CTCAGGCCGGTGACACACGG	KCNIP2	Not Significant in Both and Not Common Essential	No	0.242133	0.679314	0.176206	0.122962	0.50501	1.28966	0.00538573	0.000197408	0.0561251	0.0256534	0.000183759	0.000184565	0.000214316	0.242133	0.0479372	0.25522	0.161467	0.100435	0.000209542	0.000182687	0.00018746	0.000176006	0.000145966	0.000134751	0.000168232	0.00017354	0.278405	-1.51478	-2.79441	-0.954143	-1.42293	-2.98177	-2.82362	-3.37225	-2.3594	-3.14521	-2.93518	-2.75636	-2.51642	-3.27738	-2.98218	-2.76249	-1.94819	-2.84183	0.0156388	0.387061
AACCCAGGGGAAGTTACACG	PPFIA1	Not Significant in Both and Not Common Essential	No	0.311516	0.307228	0.274475	0.073777	0.330484	0.892672	0.337506	0.000197408	0.000244022	1.16723	0.187434	0.000184565	0.00214316	0.311516	0.214119	0.0653612	0.178287	0.238532	0.000209542	0.000182687	0.00018746	0.000176006	0.000145966	0.00134751	0.000168232	0.00017354	0.463231	0.0897787	-2.57256	-3.13172	0.579696	-0.165654	-2.60177	-2.1881	-3.00938	-2.55361	-2.97821	-3.13202	-3.1664	-1.68579	-3.02521	-3.13815	-1.19089	-2.8361	0.00761683	0.714553
GCCCTGGCCAGGAAAACCGA	TMEM215	Significant in Both and Not Common Essential	No	0.698079	0.607628	1.19956	0.498873	0.46045	0.37944	0.251334	0.00394816	0.424598	0.00213778	0.0992297	0.000184565	0.214316	0.698079	0.262057	0.426404	0.205198	0.630854	0.000209542	0.000182687	0.00018746	0.000176006	0.000145966	0.000134751	0.000168232	0.00017354	-0.204495	-0.678771	-2.1016	-0.0352045	-2.45367	-1.08238	-3.43184	-0.332128	-3.09712	-3.36811	-3.03926	-3.5544	-3.25414	-3.50029	-3.08626	-3.56053	-1.29001	-3.30752	0.0103389	0.0130992
CAACAAATTTCTCAACCAAG	ARMT1	Not Significant in Both and Not Common Essential	No	0.523913	0.419878	0.0914917	0.604269	0.608983	0.125018	0.00179524	1.15681	2.44754	1.01545	0.000183759	0.612757	0.565794	0.523913	0.153399	0.149397	0.235473	0.0156929	0.000209542	0.000182687	0.0018746	0.000176006	0.00145966	0.000134751	0.000168232	0.0017354	-0.526151	-1.70726	0.282032	0.604125	0.383535	-2.69713	0.00605797	-0.0319468	-2.86455	-2.91263	-2.09903	-1.95018	-2.02157	-3.04481	-3.14603	-0.956304	-0.460842	-2.37439	0.0643377	0.366076
TCAGGCTAGATCGATCCCAG	KY	Not Significant in Both and Not Common Essential	No	0.198237	0.1502	0.511676	0.0983694	0.297065	0.00021933	0.265696	1.00283	0.0927284	0.00213778	0.0900418	1.42669	0.00214316	0.198237	0.0607204	0.00622488	0.127828	0.0847416	0.000209542	0.000182687	0.00018746	0.000176006	0.000145966	0.000134751	0.00168232	0.00017354	-2.83557	-0.28461	1.00837	-0.505639	-1.84671	-0.754551	1.16147	-2.1418	-2.46206	-1.53242	-2.83372	-2.68257	-2.61908	-1.6646	-1.88072	-2.6887	-0.77488	-2.29548	0.0421799	0.60994
CTGGTGGGATGACAAGACAA	PPRC1	DepMap Common Essential	Yes	0.191157	0.116064	0.0609945	0.319701	0.211659	0.0877319	0.385977	0.025663	0.043924	0.079098	0.740548	0.00184565	0.00857263	0.191157	0.0159791	0.364155	0.0706419	0.125543	0.000209542	0.000182687	0.00018746	0.000176006	0.000145966	0.000134751	0.000168232	0.00017354	-0.12154	0.801271	-1.09544	-0.682935	-0.166532	1.08426	-2.23859	-1.39252	-1.88228	-3.29958	-2.57615	-2.85327	-2.0393	-3.43175	-2.62315	-2.85939	-0.476503	-2.69561	0.0633627	0.937463
AGAGCTCCACCACTGAGAGT	OR10P1	Not Significant in Both and Not Common Essential	No	0.961451	0.624696	0.95558	0.920456	0.861488	0.00438659	0.134643	0.371127	2.45242	0.000213778	0.10658	0.526011	1.11016	0.961451	1.36461	0.529114	0.33639	0.57436	0.000209542	0.000182687	0.00018746	0.00352011	0.000145966	0.000134751	0.000168232	0.00017354	-2.15354	-0.851083	-0.39448	0.454346	-3.46571	-0.952591	-0.243008	0.110136	-3.81374	-3.46184	-3.25393	-2.21263	-3.97076	-3.59402	-3.30093	-3.51978	-0.936991	-3.39095	0.0148246	0.389451
GGTTGGCATCGGGGTACGCG	CCND1	Not Significant in Both and Not Common Essential	No	0.277532	0.218473	0.321915	0.221331	0.0705529	0.00021933	0.491896	0.74028	0.000244022	0.00427557	0.780975	1.03357	0.00214316	0.277532	0.140616	0.270782	0.356573	0.188315	0.000209542	0.000182687	0.0018746	0.000176006	0.000145966	0.000134751	0.000168232	0.00017354	-2.9983	0.184132	0.524354	-2.46109	-1.7084	0.384896	0.669298	-1.51746	-2.82676	-3.17091	-2.27924	-3.02936	-2.98378	-3.30309	-3.32624	-3.03549	-0.865321	-2.99436	0.0028024	0.342353
GAGGGCGCCAGATCAGACTT	OVCA2	Not Significant in Both and Not Common Essential	No	0.370987	0.372087	0.447293	0.115935	0.972887	0.201783	0.389568	0.1066	0.0829675	0.314254	0.163545	0.0406044	0.0728674	0.370987	0.111853	0.930619	0.0706419	0.0627716	0.000209542	0.000182687	0.00018746	0.000176006	0.000145966	0.000134751	0.000168232	0.00017354	-0.26576	-0.0600088	-0.0364574	-1.06915	-0.0733637	-0.436955	-0.455641	-1.12553	-2.72738	-3.70706	-2.57615	-2.55224	-2.8844	-3.83924	-2.62315	-2.55836	-0.440359	-2.9335	0.134766	0.114571
TATCGTGAAGAACTACACTG	TKFC	Not Significant in Both and Not Common Essential	No	0.356827	0.153614	0.467624	0.172146	0.50501	0.0021933	0.00359049	8.85573	0.10737	0.0149645	0.0183759	26.4427	0.00857263	0.356827	0.121441	0.149397	0.0033639	0.229116	0.00209542	0.00182687	0.0018746	0.00352011	0.00729831	0.00539004	0.00841162	0.00520619	-1.84533	-2.11474	1.71133	-0.672417	-1.01137	-1.40565	2.18641	-1.77019	-1.76309	-1.91263	-0.253934	-1.8135	-1.22114	-1.44275	0.398037	-1.64354	-0.615245	-1.20657	0.0461762	0.257838
CACCTTCAACTAATTGGATG	CSAG3	Not Significant in Both and Not Common Essential	No	0.693831	0.416464	0.840368	1.31745	0.371331	0.160111	0.556525	4.47722	0.131772	0.183849	0.21316	7.05594	0.402914	0.693831	0.271644	0.441966	0.302751	0.351521	0.00209542	0.00182687	0.00018746	0.000176006	0.00437899	0.00269502	0.000168232	0.0017354	-0.415156	-0.178985	0.531274	-0.449938	-0.355116	-0.595764	0.728821	0.0354512	-2.11273	-2.38368	-3.20818	-3.30042	-1.79263	-2.21483	-3.25518	-2.30655	-0.0874266	-2.57177	0.00568573	0.362391
CCATTCTCAACCGGTCCAAT	Non-Targeting Control	Non-Targeting Control	No	1.12995	0.979714	0.630276	0.744797	0.311918	1.31159	0.240563	0.126341	0.000244022	1.49004	0.0238886	0.000184565	0.0492926	1.12995	0.281231	0.413954	0.339754	0.665379	0.00209542	0.000182687	0.00018746	0.000176006	0.000145966	0.000134751	0.000168232	0.00017354	0.126699	-0.418302	-0.770494	-3.10661	0.182099	-1.42134	-3.60589	-0.801259	-2.12779	-3.35524	-3.25826	-3.57754	-3.28481	-3.48742	-3.30526	-3.58367	-1.22689	-3.2475	0.0219901	0.203582
AGAGCCCAACAAACACACAA	FZD6	Not Significant in Both and Not Common Essential	No	0.349747	0.334537	0.105046	0.316187	0.0742662	2.31831	0.000179524	0.418505	0.000244022	8.07441	0.00367518	1.35471	0.00214316	0.349747	0.0479372	0.108935	0.033639	0.0690487	0.00209542	0.000182687	0.00374919	0.000176006	0.00145966	0.00269502	0.000168232	0.0017354	0.840727	-2.76726	0.121757	-2.48336	1.38267	-1.4561	0.631902	-1.53974	-1.3594	-2.77546	-0.952906	-2.59363	-1.51642	-1.60661	-2.30093	-1.59976	-0.658675	-1.83814	0.10826	0.232544
CTACTTACATGAGAACCGAA	CLRN1	Not Significant in Both and Not Common Essential	No	0.450282	0.365259	0.138932	1.40176	0.0816928	4.0883	0.00359049	0.09673	0.000244022	4.45942	0.00183759	0.404198	0.000214316	0.450282	0.0894827	0.146285	0.0370029	0.122405	0.000209542	0.00182687	0.0018746	0.00176006	0.00145966	0.000134751	0.00168232	0.00017354	1.04894	-1.58765	-1.16111	-2.52475	1.08668	-1.87855	-0.54008	-2.58113	-2.63047	-1.90349	-1.29533	-1.84227	-1.78749	-3.03567	-1.34233	-2.8484	-1.01721	-2.08568	0.0818635	0.400603
GGTGACTGGCGTCCCACAGG	BAD	Not Significant in Both and Not Common Essential	No	0.291692	0.2253	0.576059	0.396991	0.122539	1.07033	0.000179524	0.00394816	0.468522	0.786705	0.000183759	0.00184565	0.709385	0.291692	0.262057	0.217871	0.0538224	0.285611	0.000209542	0.000182687	0.0018746	0.000176006	0.000145966	0.000134751	0.000168232	0.00017354	0.676757	-3.50634	-2.00239	0.582456	0.543051	-3.49622	-2.33263	0.762608	-3.09712	-3.07649	-1.45805	-3.21025	-3.25414	-3.20867	-2.50505	-3.21638	-1.09659	-2.87827	0.00730308	0.745443
CCTTCTGCTTTACAAACAGG	LATS1	Not Significant in Both and Not Common Essential	No	0.438954	0.761242	0.220258	0.259976	0.0928327	1.25457	0.000179524	0.000197408	0.104929	1.25274	0.00183759	0.00184565	0.0535789	0.438954	0.204532	0.208533	0.639141	0.269918	0.000209542	0.000182687	0.00018746	0.000176006	0.00145966	0.000134751	0.000168232	0.00017354	0.216972	-3.08881	-3.11957	0.0531946	0.216338	-2.07868	-2.14878	-0.238707	-2.98949	-3.05747	-3.53269	-3.1857	-2.14651	-3.18964	-3.57969	-3.19183	-1.27351	-3.10913	0.0134809	0.929898
CAGGTAGGGGATTTCATCAG	DDX54	DepMap Common Essential	Yes	0.734894	0.440359	0.301584	0.372398	0.772368	0.649216	0.324939	0.00394816	0.00976088	0.314254	0.0588028	0.00553696	0.000214316	0.734894	0.821323	0.76566	1.03945	0.414292	0.000209542	0.000182687	0.00018746	0.000176006	0.000145966	0.000134751	0.000168232	0.00017354	0.168582	0.0323935	-1.97461	-1.89834	-0.146526	-0.71001	-1.82774	-3.55677	-3.59324	-3.62233	-3.74389	-3.37178	-3.75026	-3.7545	-3.79089	-3.37791	-1.23913	-3.6256	0.00167924	0.02126
GGATGTAGTGCAGATAGTCT	RPS11	DepMap Common Essential	Yes	0.413466	0.675901	0.609945	0.5059	0.620123	0.096505	1.7719	0.102652	0.431919	0.0812358	0.404269	0.0442957	0.0642947	0.413466	0.178965	0.130722	0.322934	0.593191	0.000209542	0.00182687	0.00018746	0.000176006	0.000145966	0.000134751	0.000168232	0.00017354	-0.845333	0.463149	-0.692697	-0.157076	-0.920136	-0.17862	-1.0577	-0.984303	-2.9315	-1.85464	-3.23621	-3.52767	-3.08852	-2.98682	-3.28321	-3.53379	-0.54659	-3.05529	0.0170857	0.396726
GCCAGTGGGATACCAGCAAG	MYO1A	Not Significant in Both and Not Common Essential	No	0.403555	0.11265	0.996243	0.639401	0.315631	0.236876	0.265696	0.122393	0.000244022	0.0277912	0.668882	0.04245	0.000214316	0.403555	0.281231	0.264557	0.501221	0.0972959	0.000209542	0.000182687	0.00018746	0.000176006	0.000145966	0.000134751	0.000168232	0.00017354	0.32279	-0.57398	-0.718017	-3.11175	-0.607824	-0.173016	-1.1779	-3.16813	-3.12779	-3.16081	-3.42712	-2.74257	-3.28481	-3.29299	-3.47412	-2.74869	-1.15098	-3.15736	0.0106076	0.106322
AGAGCCGCAAAAGCGCCAAG	LATS2	Not Significant in Both and Not Common Essential	No	0.314348	0.617869	1.0674	0.24241	0.716669	0.276355	7.25637	0.0177667	0.200098	0.269361	8.03577	0.00922827	0.0728674	0.314348	0.115049	0.177409	0.117736	0.210285	0.00209542	0.00365373	0.00018746	0.000176006	0.00291933	0.00539004	0.000168232	0.0017354	-0.349429	0.832392	-1.13494	-0.554076	-0.360562	0.8767	-1.41943	-0.992785	-1.73961	-1.68624	-2.798	-3.07728	-1.5956	-1.51738	-2.845	-2.08341	-0.387767	-2.16782	0.00722616	0.287051
GAGGATCCAGAGTCATAAAG	DYNLRB2	Not Significant in Both and Not Common Essential	No	0.410635	0.727105	0.396464	0.151067	0.534716	0.81152	4.16317	0.0177667	1.03709	0.136818	3.77624	0.00553696	0.642947	0.410635	0.616792	0.0933731	0.504585	0.276195	0.000209542	0.000182687	0.00018746	0.00176006	0.000145966	0.00134751	0.00168232	0.00520619	0.0477021	1.02122	-0.929563	0.287693	-0.725454	0.978856	-1.4359	0.080052	-3.46887	-2.70851	-3.43003	-2.19569	-3.62589	-1.84069	-2.47703	-1.7247	-0.0844239	-2.68392	0.0140685	0.184671
TACTCGGAATAGAGTATCGG	ESR1	Not Significant in Both and Not Common Essential	No	0.17275	0.0580319	0.227035	0.389964	0.185665	0.0021933	0.0466763	0.234916	2.21816	0.000213778	0.00183759	0.00184565	2.021	0.17275	0.102266	0.152509	0.0437307	0.298165	0.000209542	0.00182687	0.00018746	0.000176006	0.000145966	0.000134751	0.000168232	0.0017354	-1.42257	-0.686996	-0.220112	1.07726	-2.4337	-2.09184	-2.32488	1.03684	-2.68846	-1.92159	-2.36788	-3.22893	-2.84548	-3.05376	-2.41488	-2.23506	-0.88325	-2.5945	0.0224564	0.330787
TACTAGTATTGAAAATCAGT	TLR2	Not Significant in Both and Not Common Essential	No	0.278948	0.0546182	0.342247	0.0526979	0.0854061	0.00021933	0.000179524	0.876492	0.00488044	0.000213778	0.000183759	0.478024	0.000214316	0.278948	0.0607204	0.0560239	0.0941892	0.000313858	0.000209542	0.000182687	0.00018746	0.000176006	0.000145966	0.000134751	0.000168232	0.00017354	-2.39624	-3.28022	1.22095	-1.24303	-2.40737	-3.27009	0.957656	-2.60043	-2.46206	-2.48667	-2.70109	-0.251206	-2.61908	-2.61884	-2.74809	-0.257334	-1.62735	-2.01805	0.109323	0.957196
GGAGGCTGTAGTGGGGCTGG	SPCS2	DepMap Common Essential	Yes	0.472938	0.296987	0.755654	0.534005	0.761228	0.234683	2.96574	0.446142	0.0146413	0.0406179	2.72514	0.298996	0.000214316	0.472938	0.380302	0.295682	0.538224	1.80154	0.00209542	0.000182687	0.00374919	0.000176006	0.000145966	0.000134751	0.000168232	0.00017354	-0.102256	0.59381	-0.0780722	-1.71594	-0.86402	0.557066	-0.25188	-3.55046	-2.25886	-3.20912	-2.15703	-4.01012	-3.41588	-3.34129	-3.50505	-4.01624	-0.676468	-3.2392	0.0669215	0.556983
CTGGGGCTAAACTAACAGGC	SPZ1	Not Significant in Both and Not Common Essential	No	0.218061	0.0716864	0.820037	0.0140528	0.118826	0.00021933	0.116691	0.621835	0.000244022	0.00213778	0.0202135	0.596146	0.000214316	0.218061	0.0415455	0.0809234	0.0571863	0.467648	0.000209542	0.000182687	0.00018746	0.000176006	0.000145966	0.000134751	0.000168232	0.00017354	-2.51434	-0.846796	1.64591	-2.68748	-1.52547	-1.60819	1.62759	-2.74386	-2.29725	-2.64637	-2.48438	-3.42439	-2.45427	-2.77854	-2.53138	-3.43052	-1.08158	-2.75589	0.0967702	0.666731
GCGGCACCGCCACGTCGGAG	MAP6D1	Not Significant in Both and Not Common Essential	No	0.352579	0.167268	0.301584	0.428609	0.0334198	0.00021933	0.1508	0.475753	0.000244022	0.000213778	0.202135	0.526011	0.00214316	0.352579	0.108658	0.248995	0.0941892	0.0627716	0.000209542	0.000182687	0.00018746	0.000176006	0.000145966	0.000134751	0.000168232	0.00017354	-2.88231	-0.301007	0.0453202	-2.13657	-2.89345	-0.173767	0.0889335	-1.19295	-2.71479	-3.13448	-2.70109	-2.55224	-2.87181	-3.26666	-2.74809	-2.55836	-1.18073	-2.81844	0.0345251	0.423687
AGTGCTGGCACTGTCACGTG	TMEM151A	Not Significant in Both and Not Common Essential	No	0.368155	0.0989955	0.176206	0.361859	0.612696	0.864159	0.0269286	0.0118445	0.000244022	0.45321	0.000183759	0.000184565	0.000214316	0.368155	0.252469	0.488653	0.0168195	0.0627716	0.000209542	0.000182687	0.00018746	0.000176006	0.000145966	0.000134751	0.000168232	0.00017354	0.940978	-0.815807	-1.48502	-3.39982	0.660684	-2.98177	-3.29239	-3.45619	-3.08094	-3.42729	-1.9529	-2.55224	-3.23796	-3.55947	-1.9999	-2.55836	-1.72867	-2.79613	0.0564037	0.309386
TCCATAAACCACATTGACCC	OR51D1	Not Significant in Both and Not Common Essential	No	0.236469	0.133132	0.45407	0.519952	0.441884	0.289515	0.00179524	1.44305	0.0854077	0.500242	0.00183759	1.83089	0.0171453	0.236469	0.463393	0.161847	0.107645	0.13182	0.000209542	0.00182687	0.00018746	0.000176006	0.000145966	0.00134751	0.000168232	0.00017354	0.337389	-2.403	0.443318	-0.713811	0.574898	-2.39287	0.546699	-1.41116	-3.34468	-1.9474	-2.75909	-2.87445	-3.5017	-2.07957	-2.80609	-2.88058	-0.627318	-2.77419	0.0271639	0.551256
AGCCGAGACAAAGATCCCAG	SYT11	Not Significant in Both and Not Common Essential	No	0.477186	0.768069	0.179595	0.386451	0.293351	0.693082	0.00359049	1.26539	0.488044	0.553686	0.00183759	1.46545	1.26232	0.477186	0.210924	0.946181	1.10336	0.66224	0.00209542	0.000182687	0.00018746	0.000176006	0.000145966	0.00269502	0.000168232	0.00017354	-0.0446156	-1.69914	0.51513	0.221071	-0.142137	-1.99005	0.578877	0.633782	-2.00285	-3.71427	-3.76981	-3.57549	-3.15987	-2.54541	-3.81681	-3.58162	-0.240885	-3.27077	0.0131883	0.217144
AGTACCTGCATCGTCCAAGT	PHACTR3	Not Significant in Both and Not Common Essential	No	0.455946	0.269677	1.35204	0.231871	0.627549	0.00021933	0.305191	0.0177667	0.685702	0.00427557	1.09153	0.0166109	1.09087	0.455946	0.217315	1.04267	0.322934	0.0690487	0.00209542	0.000182687	0.00018746	0.000176006	0.000145966	0.000134751	0.000168232	0.00017354	-3.08975	-0.646418	-1.11564	0.0384878	-1.79985	-0.0929539	-1.14485	0.240125	-2.01582	-3.75644	-3.23621	-2.59363	-3.17284	-3.88861	-3.28321	-2.59976	-0.951356	-3.06831	0.0659849	0.503172
GTGAAGTCAGCAAGACTCAG	NR1I3	Not Significant in Both and Not Common Essential	No	0.284612	0.819273	0.640442	1.05044	0.211659	0.0021933	1.44337	0.736332	0.0854077	0.00213778	2.806	0.708731	0.0192884	0.284612	0.0926785	0.183634	0.188378	0.502173	0.000209542	0.00182687	0.00018746	0.000176006	0.00145966	0.000134751	0.000168232	0.0017354	-2.57233	0.352898	-0.154298	-0.39414	-2.58347	0.641608	-0.17089	-1.04034	-2.64571	-2.00225	-3.00212	-3.45533	-1.80273	-3.13442	-3.04912	-2.46145	-0.74012	-2.69414	0.0233784	0.752754
CATACTTACGAAGACACACA	ATG16L1	Significant in Both and Not Common Essential	No	1.00959	1.02751	0.264309	0.470768	0.382471	0.649216	0.000179524	0.347438	0.0951686	0.143232	0.000183759	0.119968	0.000214316	1.00959	0.41226	0.364155	0.174923	0.367214	0.000209542	0.000182687	0.00018746	0.000176006	0.000145966	0.000134751	0.000168232	0.00017354	-0.199397	-3.16799	-0.13193	-0.604105	-0.855746	-3.15786	-0.593742	-3.25154	-3.2939	-3.29958	-2.96994	-3.31939	-3.45092	-3.43175	-3.01694	-3.32552	-1.49529	-3.26349	0.0305569	0.0429941
TCTTCTTCCAATGTAAACGG	DCLK2	Not Significant in Both and Not Common Essential	No	0.376651	0.406223	0.0711602	0.17566	1.04344	0.879512	0.00359049	0.0848855	0.197658	1.07744	0.000183759	0.262083	0.338619	0.376651	0.0639162	0.0809234	0.191742	0.150652	0.000209542	0.000182687	0.00018746	0.000176006	0.000145966	0.000134751	0.00168232	0.00017354	0.335477	-1.29708	-0.315839	-0.722553	0.423629	-2.58799	0.173766	-0.488756	-2.48434	-2.64637	-3.00981	-2.93245	-2.64136	-2.77854	-2.05681	-2.93858	-0.559919	-2.68603	0.0369563	0.795695
AGCAATGGGAAGACCCCAGT	MPC1	Not Significant in Both and Not Common Essential	No	0.775958	0.406223	1.0098	0.537518	0.375044	0.0350927	1.16691	1.57137	0.000244022	0.000213778	0.602729	1.48021	0.000214316	0.775958	0.453805	1.39126	0.598774	0.646547	0.000209542	0.000182687	0.00374919	0.000176006	0.000145966	0.000134751	0.000168232	0.00017354	-1.06355	0.062802	0.465885	-3.18665	-3.2788	-0.224113	0.43993	-3.24303	-3.3356	-3.8817	-2.20333	-3.56507	-3.49262	-4.01388	-3.55135	-3.5712	-1.25344	-3.45184	0.00900912	0.961084
ATGGCCAGTCACGAGAACCC	ZNF787	Not Significant in Both and Not Common Essential	No	0.399307	0.143373	1.93827	0.151067	0.698102	0.00021933	2.96933	1.17063	0.126891	0.00213778	4.78508	0.0775175	0.00214316	0.399307	0.239686	0.354818	0.602138	0.0690487	0.000209542	0.00182687	0.00374919	0.000176006	0.000145966	0.00134751	0.00168232	0.00017354	-2.81537	0.185244	0.88925	-0.740488	-1.8265	0.392475	-0.28977	-2.51286	-3.05837	-2.2883	-2.20576	-2.59363	-3.21539	-2.42047	-2.55379	-2.59976	-0.839753	-2.61693	0.0197552	0.522865
GTAGCCACTCTTCTCCACCA	TSPAN11	Not Significant in Both and Not Common Essential	No	0.26762	1.06847	0.274475	0.189712	0.226512	1.92133	0.000179524	0.000197408	0.000244022	1.07744	0.00183759	0.000184565	0.000214316	0.26762	0.370714	0.354818	0.168195	0.0910188	0.000209542	0.000182687	0.0018746	0.000176006	0.000145966	0.000134751	0.000168232	0.00017354	0.25484	-3.18438	-2.98273	-2.96766	0.00363076	-2.17425	-3.01195	-3.02404	-3.24777	-3.2883	-1.9529	-2.7136	-3.40479	-3.42047	-2.9999	-2.71973	-2.13582	-2.96843	0.00965615	0.923561
CCAAAGACTCAACCTTGCGA	GIMAP8	Not Significant in Both and Not Common Essential	No	0.355411	0.1502	0.105046	0.0210792	0.115113	0.00021933	0.000179524	0.842932	0.000244022	0.000213778	0.000183759	0.503864	0.000214316	0.355411	0.00319581	0.364155	0.0470946	0.417431	0.000209542	0.000182687	0.00018746	0.000176006	0.000145966	0.000134751	0.000168232	0.00017354	-2.83557	-2.76726	1.60194	-2.6737	-2.84671	-2.75713	1.37846	-2.73007	-1.18331	-3.29958	-2.40006	-3.37506	-1.34033	-3.43175	-2.44706	-3.38119	-1.70375	-2.60729	0.053606	0.883797
CCTGGAGAGACTCATACGGG	C19orf54	Not Significant in Both and Not Common Essential	No	0.339835	0.334537	0.0779374	0.15458	0.47159	1.3752	0.000179524	0.0157926	0.0683262	1.53707	0.000183759	0.000184565	0.000214316	0.339835	1.05462	0.171184	0.33639	0.229116	0.000209542	0.000182687	0.0018746	0.000176006	0.000145966	0.000134751	0.000168232	0.00017354	0.613922	-2.63762	-0.9907	-0.838977	0.662249	-2.6275	-2.923	-3.34251	-3.70182	-2.97176	-2.25393	-3.11453	-3.85884	-3.10393	-3.30093	-3.12066	-1.51052	-3.1783	0.0566527	0.698904
GCTCTGTTACTATGGACAAG	ARFGAP1	Not Significant in Both and Not Common Essential	No	0.617368	0.945578	0.423573	0.832627	0.256218	0.879512	0.000179524	0.501417	0.000244022	0.925661	0.00183759	0.321144	0.000214316	0.617368	0.869261	0.24277	0.921709	0.244809	0.000209542	0.000182687	0.00018746	0.000176006	0.00145966	0.000134751	0.000168232	0.00017354	-0.0314556	-3.37281	-0.220251	-3.02118	-0.00924539	-2.36268	-0.413751	-3.07756	-3.61788	-3.12349	-3.69169	-3.1433	-2.7749	-3.25566	-3.73869	-3.14943	-1.56362	-3.31188	0.0167147	0.160854
TCAAACGTCTTGTAACACGC	AKAP5	Not Significant in Both and Not Common Essential	No	0.421962	0.215059	0.132155	0.0597243	0.293351	0.484719	0.00359049	0.0098704	8.30651	0.111165	0.00735035	0.0147652	16.1015	0.421962	0.0639162	0.124497	0.13792	0.100435	0.000209542	0.00182687	0.00018746	0.00176006	0.00437899	0.00539004	0.00841162	0.00347079	0.352932	-1.56593	-0.781816	1.45203	-0.28659	-1.25478	-0.606912	1.73948	-2.48434	-1.83345	-2.86672	-1.75636	-1.16424	-1.36357	-1.21475	-1.46146	-0.118948	-1.76811	0.0606578	0.211704
AGCCGGCAAGAACTACAACA	ADGRL1	Not Significant in Both and Not Common Essential	No	0.438954	0.283332	0.0643831	0.16512	0.100259	0.00021933	0.000179524	0.787658	0.000244022	0.000213778	0.00367518	0.553696	0.000214316	0.438954	0.361127	0.177409	0.0941892	0.0941573	0.000209542	0.000182687	0.00018746	0.000176006	0.000145966	0.000134751	0.000168232	0.00017354	-3.1112	-2.55465	0.678538	-2.61369	-3.12233	-1.24349	0.525472	-2.67007	-3.23639	-2.98727	-2.70109	-2.72833	-3.39341	-3.11944	-2.74809	-2.73445	-1.76393	-2.95606	0.0302911	0.753911
TAAATTTATAGGTATCCGTG	C2CD5	Not Significant in Both and Not Common Essential	No	0.43329	0.133132	0.172818	0.259976	0.311918	0.00021933	0.183115	1.1805	0.617376	0.00213778	0.022051	1.92502	0.679381	0.43329	0.997093	0.289457	0.373393	0.477064	0.000209542	0.000182687	0.00018746	0.00352011	0.000145966	0.000134751	0.000168232	0.00017354	-2.78318	0.0251349	0.657133	0.296509	-1.79432	-0.894161	0.869502	0.338073	-3.67746	-3.19988	-3.29926	-2.13202	-3.83448	-3.33205	-3.34626	-3.43918	-0.410664	-3.28257	0.0146755	0.244731
TCCTACGACCACGATAGAGT	BRI3	DepMap Common Essential	Yes	0.358243	0.0716864	0.613333	0.337266	0.47159	0.252229	0.646287	0.120419	0.54905	0.669127	0.562302	0.0812088	0.111444	0.358243	0.0766995	0.164959	0.898161	0.342105	0.000209542	0.000182687	0.0018746	0.000176006	0.000145966	0.000134751	0.000168232	0.00017354	0.546358	0.0227291	-0.447278	0.0660473	0.970072	-0.0377267	-0.618369	-0.626508	-2.56352	-2.95567	-2.68045	-3.28863	-2.72054	-3.08784	-3.72745	-3.29476	-0.0155844	-3.03986	0.061696	0.978086
GGGAACGAAGACGCACACAA	NEK10	Not Significant in Both and Not Common Essential	No	0.665511	0.549596	1.91116	0.291595	0.111399	0.0482525	1.06996	0.000197408	0.000244022	0.0106889	1.68691	0.00369131	0.00214316	0.665511	0.140616	0.588251	0.316207	0.593191	0.000209542	0.000182687	0.00018746	0.000176006	0.000145966	0.000134751	0.00168232	0.00017354	-1.05652	-0.25193	-3.16942	-2.65945	-1.71111	-0.0542051	-1.8976	-1.71583	-2.82676	-3.50786	-3.22706	-3.52767	-2.98378	-3.64003	-2.27406	-3.53379	-1.56451	-3.19013	0.0099234	0.393807
TCCAGGTGGGGTCCGCGTCG	UTF1	Not Significant in Both and Not Common Essential	No	0.171334	0.1502	1.05046	0.34078	0.297065	0.381634	0.683987	0.142134	0.2245	0.352734	1.00884	0.0461414	0.0471495	0.171334	0.143812	0.373492	0.370029	0.6183	0.000209542	0.000182687	0.00018746	0.00176006	0.000145966	0.000134751	0.000168232	0.00017354	0.404977	-0.186332	-0.379776	-0.121635	0.370777	-0.0175572	-0.868383	-0.799374	-2.83652	-3.31057	-3.29533	-2.54567	-2.99354	-3.44275	-3.34233	-3.5518	-0.199663	-3.16481	0.0172905	0.845588
TGGTGGAAGAATCCCCAGGT	ZNF208	Not Significant in Both and Not Common Essential	No	0.208149	0.133132	0.264309	0.565624	0.434457	0.00021933	1.43619	0.0335594	0.251343	0.000213778	1.14849	0.000184565	0.0707242	0.208149	0.0191749	0.389055	0.19847	0.106712	0.000209542	0.00182687	0.00018746	0.000176006	0.000145966	0.000134751	0.000168232	0.00017354	-2.78318	0.7351	-1.22671	-0.23768	-2.79432	0.638015	-3.48638	-0.788379	-1.96146	-2.3283	-3.02479	-2.78269	-2.11848	-3.46048	-3.07179	-2.78881	-1.24294	-2.6921	0.0405697	0.837637
AGTGGACCGCAACATCAAGG	NONO	Not Significant in Both and Not Common Essential	No	0.315764	0.303814	0.487956	0.0526979	0.211659	1.69322	0.0448811	0.00197408	0.000244022	0.981243	0.0202135	0.118122	0.000214316	0.315764	0.105462	0.554014	0.144648	0.02197	0.000209542	0.000182687	0.00018746	0.000176006	0.000145966	0.000134751	0.000168232	0.0017354	0.746106	-1.03632	-1.42643	-2.93821	0.509169	-1.38274	0.350537	-2.99458	-2.70182	-3.48181	-2.8874	-2.0963	-2.85884	-3.61399	-2.9344	-1.10243	-1.02156	-2.70963	0.0732258	0.732903
GGGCAGCTCCCATCGAACAG	ARHGAP27	DepMap Common Essential	Yes	0.237885	0.102409	0.186372	0.0948562	0.0408464	0.00021933	0.423677	0.523131	0.000244022	0.000213778	0.0826914	0.31007	0.000214316	0.237885	0.341952	0.108935	0.117736	0.204008	0.000209542	0.000182687	0.00018746	0.000176006	0.000145966	0.000134751	0.000168232	0.00017354	-2.66924	0.356654	0.741545	-2.22372	-2.68038	-0.35292	0.514394	-2.2801	-3.21269	-2.77546	-2.798	-3.06412	-3.36971	-2.90764	-2.845	-3.07025	-1.07422	-3.00536	0.00918638	0.687561
ATGCTACACGTCGACCGCCA	KCNQ1	Not Significant in Both and Not Common Essential	No	0.630112	0.194577	0.186372	0.590216	0.297065	0.00021933	0.000179524	0.412583	0.000244022	0.00213778	0.00183759	0.920981	0.000214316	0.630112	0.447414	0.429516	0.185014	0.480202	0.000209542	0.000182687	0.00018746	0.000176006	0.000145966	0.000134751	0.000168232	0.00017354	-2.94799	-3.01626	-0.1555	-3.08542	-1.95913	-2.00613	0.19324	-3.1418	-3.32944	-3.37127	-2.9943	-3.4359	-3.48646	-3.50345	-3.0413	-3.44202	-2.01487	-3.32552	0.00374841	0.193187
AGAAGCACTCAGTAACAAGG	MAGEA4	Not Significant in Both and Not Common Essential	No	0.641439	0.669073	0.189761	0.396991	0.0705529	2.85129	0.000179524	0.00197408	0.173256	4.64754	0.000183759	0.00184565	0.000214316	0.641439	0.147007	0.25522	0.235473	0.85997	0.00209542	0.00182687	0.0018746	0.000176006	0.00145966	0.000134751	0.000168232	0.00017354	0.629568	-3.02408	-2.30342	0.390173	0.84175	-3.01396	-2.33263	-2.51746	-1.84607	-2.14521	-2.09903	-3.68896	-2.00309	-3.27738	-3.14603	-3.69508	-1.41626	-2.73761	0.0360588	0.406412
CATGTCAGCATTGCCGACGT	MLXIPL	Not Significant in Both and Not Common Essential	No	0.259125	0.211646	0.240589	0.555084	0.0371331	0.495685	0.0628335	0.102652	0.0268424	0.581477	0.0661531	0.000184565	0.000214316	0.259125	0.00639162	0.0933731	0.104281	0.301304	0.000209542	0.000182687	0.00018746	0.000176006	0.000145966	0.000134751	0.000168232	0.00017354	0.369596	-0.583085	-0.732991	-0.14094	0.438922	-0.560726	-3.47821	-2.23871	-1.48434	-2.70851	-2.7453	-3.23348	-1.64136	-2.84069	-2.7923	-3.23961	-0.865767	-2.5857	0.0501937	0.442789
GGTGCACCAGCACGACGTAG	PRLHR	Not Significant in Both and Not Common Essential	No	0.334172	0.174096	0.647219	0.0316187	0.805788	3.5334	0.296215	0.00394816	1.03709	1.86629	0.00735035	0.000184565	0.642947	0.334172	0.134224	0.224095	0.144648	0.169483	0.00209542	0.000182687	0.00018746	0.00176006	0.00291933	0.000134751	0.000168232	0.00017354	1.3074	-0.339444	-0.903549	0.109596	1.03019	-1.94474	-2.23379	-0.0980456	-1.80656	-3.08872	-2.8874	-1.9836	-1.66255	-3.2209	-2.9344	-2.98973	-0.384048	-2.57173	0.00545322	0.286014
CAGTGGCTGATAGCCTGAAG	OR51F1	Not Significant in Both and Not Common Essential	No	0.397891	0.863651	1.0674	0.386451	0.107686	1.19096	0.96584	0.000197408	0.358712	0.303565	1.24405	0.00184565	0.0707242	0.397891	0.204532	1.27921	0.864522	0.0470787	0.000209542	0.000182687	0.00018746	0.00176006	0.00145966	0.000134751	0.000168232	0.00017354	0.139559	-0.043422	-3.29173	0.522587	-0.454087	0.0665106	-2.32095	-0.182591	-2.98949	-3.84523	-3.66387	-1.4273	-2.14651	-3.97741	-3.71087	-2.43342	-0.695515	-3.02426	0.0693573	0.856434
CGCAATTGTCTGGAGCACGT	CLPSL1	Not Significant in Both and Not Common Essential	No	0.301604	0.0887546	0.081326	0.0983694	0.133679	0.00438659	3.5456	0.0098704	0.2245	0.00427557	4.26688	0.0166109	0.0900126	0.301604	0.0127832	0.323693	0.0740058	0.229116	0.000209542	0.000182687	0.00018746	0.000176006	0.00291933	0.00134751	0.00168232	0.0017354	-1.30606	1.63946	-0.998525	0.225153	-1.3172	1.71988	-0.772467	-0.17176	-1.78537	-3.24843	-2.59636	-3.11453	-0.641356	-2.3806	-1.64336	-2.12066	-0.12269	-2.19133	0.0390628	0.208431
GAAAGGACTGATGACATCGG	FMO5	Not Significant in Both and Not Common Essential	No	0.407803	0.0580319	0.0135543	0.291595	0.0705529	0.00021933	0.000179524	0.611965	0.000244022	0.000213778	0.000183759	1.98408	0.00214316	0.407803	0.051133	0.0560239	0.0067278	0.00627716	0.000209542	0.000182687	0.00018746	0.000176006	0.00145966	0.000134751	0.000168232	0.00017354	-2.42257	-1.87795	0.321947	-2.46109	-2.4337	-1.86783	0.832779	-1.51746	-2.38743	-2.48667	-1.55496	-1.55224	-1.54445	-2.61884	-1.60196	-1.55836	-1.42823	-1.91311	0.23977	0.563732
CCATATTCTGATCAACAATG	RDH12	Not Significant in Both and Not Common Essential	No	0.395059	0.0887546	0.0643831	0.0456715	0.0371331	0.00021933	0.00179524	0.645524	0.000244022	0.000213778	0.000183759	1.94901	0.000214316	0.395059	0.0926785	0.305019	0.158103	0.0564944	0.000209542	0.000182687	0.00018746	0.000176006	0.00145966	0.000134751	0.000168232	0.00017354	-2.60709	-1.55465	1.15027	-2.18233	-2.61823	-2.54452	1.63017	-2.23871	-2.64571	-3.22262	-2.92603	-2.50648	-1.80273	-3.35479	-2.97303	-2.51261	-1.37064	-2.743	0.0354076	0.457982
CTCCACGTCAACCTGGCCAG	INS-IGF2	Not Significant in Both and Not Common Essential	No	0.356827	0.334537	0.145709	0.129988	1.4779	0.208363	0.00179524	0.574457	1.10054	0.0384801	0.00183759	1.51159	1.23875	0.356827	0.194944	0.333031	0.188378	0.687349	0.00209542	0.000182687	0.00018746	0.00176006	0.000145966	0.000134751	0.000168232	0.00017354	-0.205624	-1.90936	0.645354	-0.128039	-0.939208	-1.89924	1.06553	-0.0766614	-1.96864	-3.26078	-3.00212	-2.59165	-3.12566	-3.39295	-3.04912	-3.59778	-0.430906	-2.99859	0.0178659	0.780735
TGGCAGCATACCATTTATCG	MANSC4	Not Significant in Both and Not Common Essential	No	0.322844	1.25963	0.95558	0.179173	0.311918	0.00021933	0.597816	0.448116	0.000244022	0.000213778	0.0643156	0.217787	0.000214316	0.322844	0.111853	0.566464	0.0807336	0.0784645	0.000209542	0.000182687	0.00018746	0.000176006	0.000145966	0.000134751	0.000168232	0.00017354	-3.75914	-0.2037	0.398118	-3.10661	-3.77028	-1.17195	0.0847594	-3.16299	-2.72738	-3.49146	-2.63415	-2.64915	-2.8844	-3.62364	-2.68115	-2.65527	-1.83647	-2.91832	0.0713918	0.108502
GACGCCCCGCTTCACCACAA	TUBGCP6	DepMap Common Essential	Yes	0.811357	0.252609	0.254144	0.537518	0.363904	0.712821	0.161572	2.51893	0.0707664	0.716158	0.0826914	1.41931	0.000214316	0.811357	0.188553	0.423291	0.329662	0.273056	0.000209542	0.000182687	0.0018746	0.000176006	0.00145966	0.000134751	0.00168232	0.00017354	0.450532	-0.196714	0.670823	-0.71116	0.45256	-0.48762	0.421684	-3.22993	-2.95416	-3.36493	-2.24516	-3.19072	-2.11118	-3.49711	-2.29216	-3.19685	-0.328728	-2.85653	0.0203316	0.438099
ATAGAGCAAATTATTACCGG	SHCBP1L	Not Significant in Both and Not Common Essential	No	0.337004	0.798792	0.521842	0.24241	0.122539	0.743528	0.244153	0.000197408	0.000244022	0.282188	0.0551276	0.000184565	0.000214316	0.337004	0.319581	0.389055	0.201834	0.332689	0.000209542	0.000182687	0.00018746	0.000176006	0.000145966	0.000134751	0.000168232	0.00017354	-0.0311364	-0.329877	-3.08919	-2.70085	-0.451895	-0.97617	-3.1184	-2.75722	-3.18331	-3.3283	-3.03209	-3.27651	-3.34033	-3.46048	-3.07909	-3.28264	-1.68184	-3.24784	0.000516547	0.147442
ATGAAAAGCCAGAGGAACGC	UBE2G1	Not Significant in Both and Not Common Essential	No	0.392227	0.785137	0.189761	0.210792	0.430744	0.291708	0.396749	0.000197408	0.0976088	0.171023	0.338116	0.00369131	0.0257179	0.392227	0.102266	0.199196	0.306115	0.141236	0.000209542	0.000182687	0.00018746	0.000176006	0.000145966	0.000134751	0.000168232	0.00017354	-0.429997	0.320309	-3.02849	-0.64473	-0.661891	0.250859	-1.75667	-1.22398	-2.68846	-3.03757	-3.21298	-2.90442	-2.84548	-3.16975	-3.25998	-2.91055	-0.896825	-3.00365	0.0130269	0.0968755
AGGTGCTGGAATATTTACTA	CCDC178	Not Significant in Both and Not Common Essential	No	0.734894	0.279918	0.471013	0.295108	1.05087	0.00021933	0.0933526	0.00394816	0.856517	0.000213778	0.0679907	0.000184565	0.302185	0.734894	0.591225	0.348593	0.383485	0.172622	0.000209542	0.000182687	0.00018746	0.000176006	0.000145966	0.000134751	0.000168232	0.00017354	-3.10593	-0.702906	-1.87359	-0.088813	-3.11707	-0.840583	-3.20383	-0.541276	-3.45048	-3.28061	-3.31084	-2.99157	-3.6075	-3.41279	-3.35784	-2.9977	-1.68425	-3.30117	0.0104666	0.056808
CTATCATAAGAATGTGAACG	RSRC1	Not Significant in Both and Not Common Essential	No	0.345499	0.754414	0.332081	0.151067	0.159672	0.809326	0.00179524	0.000197408	0.000244022	0.51093	0.000183759	0.000184565	0.000214316	0.345499	0.287623	0.911944	0.306115	0.0972959	0.000209542	0.000182687	0.00018746	0.000176006	0.000145966	0.000134751	0.000168232	0.00017354	0.0305138	-2.26712	-2.8838	-2.8158	-0.169248	-3.257	-2.91302	-2.87217	-3.13755	-3.69826	-3.21298	-2.74257	-3.29457	-3.83044	-3.25998	-2.74869	-2.14346	-3.24063	0.0471119	0.267729
TCCAGCACCACGCGGCCGAG	PPIF	Not Significant in Both and Not Common Essential	No	0.240717	0.672487	0.149098	0.5059	0.880054	0.0285129	0.000179524	0.0513261	0.890681	0.00213778	0.000183759	0.00184565	1.84526	0.240717	0.166182	0.192971	0.447399	1.07967	0.000209542	0.000182687	0.00018746	0.000176006	0.000145966	0.000134751	0.000168232	0.0017354	-1.37264	-2.91935	-0.993726	0.00521287	-2.49772	-2.90922	-2.43792	0.321548	-2.89931	-3.02378	-3.37779	-3.78776	-3.05633	-3.15596	-3.42479	-2.79389	-1.60048	-3.18995	0.067665	0.628133
GGAGAGCCGGGCACACTGCG	RNF207	Not Significant in Both and Not Common Essential	No	0.681087	0.542769	0.176206	0.569137	1.04715	0.456206	0.000179524	0.136212	0.678381	0.568651	0.00183759	0.053524	2.20531	0.681087	1.42853	0.48554	0.191742	1.87373	0.000209542	0.000182687	0.00018746	0.00176006	0.00145966	0.000134751	0.000168232	0.00017354	-0.075454	-2.9919	-0.621001	-0.188535	0.0202308	-1.98177	-1.02667	0.323461	-3.83362	-3.42452	-3.00981	-3.02718	-2.99064	-3.55669	-3.05681	-4.03331	-0.817705	-3.36657	0.0404043	0.764498
TACTTACAATTTGCTAACAG	ANKRA2	Not Significant in Both and Not Common Essential	No	0.307268	0.395982	0.0779374	0.133501	0.263645	3.25924	0.000179524	0.00197408	0.00488044	1.14585	0.000183759	0.000184565	0.000214316	0.307268	0.463393	0.118273	0.39694	0.0878802	0.000209542	0.00182687	0.00018746	0.00176006	0.000145966	0.000134751	0.000168232	0.00017354	0.915441	-2.63762	-1.83012	-1.73256	0.461452	-2.6275	-2.85934	-3.08996	-3.34468	-1.81118	-3.32582	-1.69836	-3.5017	-2.94335	-3.37282	-2.70449	-1.67503	-2.8378	0.0211918	0.471441
CATCAATAACTTAAACCCCA	PSG7	Not Significant in Both and Not Common Essential	No	0.665511	0.617869	0.243978	0.516439	0.141106	0.267582	0.0861716	0.0809373	0.0951686	0.0684091	0.0183759	0.701349	0.00214316	0.665511	0.0958743	0.0964856	0.571863	0.0847416	0.000209542	0.000182687	0.00018746	0.000176006	0.000145966	0.000134751	0.000168232	0.00017354	-0.36344	-0.451987	-0.80487	-0.171052	-0.955783	-1.1231	0.132915	-1.81849	-2.66043	-2.72275	-3.48438	-2.68257	-2.81745	-2.85493	-3.53138	-2.6887	-0.694476	-2.93033	0.0800345	0.0712529
TGCACCAACTACACACACAG	PRMT5	DepMap Common Essential	Yes	1.14553	0.962646	1.04029	0.477794	0.256218	0.160111	0.497282	0.00197408	0.000244022	0.0149645	0.641318	0.000184565	0.00214316	1.14553	0.357931	0.438854	0.178287	2.07774	0.000209542	0.000182687	0.00018746	0.000176006	0.000145966	0.000134751	0.000168232	0.00017354	-0.779045	-0.320552	-2.38388	-3.02118	-1.8084	-0.210081	-3.41309	-2.07756	-3.23253	-3.38061	-2.97821	-4.07206	-3.38955	-3.51279	-3.02521	-4.07819	-1.75172	-3.45864	0.0747304	0.0194
CATCCCATATGCATTAAGAG	FGG	Not Significant in Both and Not Common Essential	No	0.338419	0.153614	0.874254	0.323214	0.568136	0.00657989	1.87064	0.726462	0.0732066	0.00213778	2.8207	0.12735	0.000214316	0.338419	0.252469	0.10271	0.242201	0.081603	0.000209542	0.000182687	0.00018746	0.000176006	0.000145966	0.00134751	0.000168232	0.00347079	-1.36821	0.330353	0.351723	-0.889902	-1.85647	0.508719	-0.404491	-3.4234	-3.08094	-2.74991	-3.11127	-2.66618	-3.23796	-1.88208	-3.15827	-1.37128	-0.84396	-2.65723	0.013948	0.54461
GTAGGTTTGGATAAATACCT	EIF1AX	DepMap Common Essential	Yes	0.539489	0.238955	0.132155	0.576164	0.412177	0.0021933	1.36079	0.0098704	0.0122011	0.00213778	1.42046	0.000184565	0.000214316	0.539489	0.393085	0.143172	0.306115	0.0439401	0.000209542	0.000182687	0.00018746	0.000176006	0.000145966	0.000134751	0.000168232	0.0017354	-2.03722	1.01271	-1.76621	-1.52868	-2.04835	1.03135	-3.4944	-3.28403	-3.27322	-2.89415	-3.21298	-2.39733	-3.43023	-3.02633	-3.25998	-1.40346	-1.51436	-2.86221	0.0318604	0.90819
AAGCATGGCTGGCTGTACAA	DOCK9	Not Significant in Both and Not Common Essential	No	0.389395	0.197991	0.54895	1.0399	0.237652	0.0021933	2.4918	0.098704	0.000244022	0.00213778	0.323415	0.000184565	0.000214316	0.389395	0.0894827	0.220983	0.067278	0.615161	0.000209542	0.000182687	0.0018746	0.000176006	0.000145966	0.000134751	0.000168232	0.00017354	-1.95555	0.65698	-1.02266	-2.98851	-1.96668	-0.229773	-3.75084	-3.04489	-2.63047	-3.08265	-1.55496	-3.54346	-2.78749	-3.21483	-2.60196	-3.54959	-1.78774	-2.87068	0.0541535	0.737696
GTGTGGCGTAGATCCAGCCT	PHF2	Not Significant in Both and Not Common Essential	No	0.505505	0.228714	0.0304972	0.189712	0.285925	0.00021933	0.00179524	0.848855	0.000244022	0.000213778	0.000183759	1.60572	0.000214316	0.505505	0.0479372	1.39126	0.285931	2.11226	0.000209542	0.000182687	0.00018746	0.000176006	0.000145966	0.00134751	0.000168232	0.00017354	-3.01819	-1.23014	0.650739	-3.06882	-3.02933	-2.22001	0.927575	-3.1252	-2.3594	-3.8817	-3.18335	-4.07922	-2.51642	-3.01388	-3.23035	-4.08535	-1.76417	-3.29371	0.0871484	0.800322
GATAGGGGTGTACCACGCAA	LMNTD1	Not Significant in Both and Not Common Essential	No	0.28178	0.211646	0.457459	0.140528	0.341624	0.00021933	0.125667	0.000197408	0.802833	0.000213778	0.0992297	0.000184565	0.278611	0.28178	0.325973	0.208533	0.158103	0.182038	0.000209542	0.000182687	0.00018746	0.000176006	0.000145966	0.000134751	0.000168232	0.00017354	-2.98451	-0.561131	-2.8524	0.371077	-2.99565	-0.66371	-2.88161	-0.0885501	-3.19191	-3.05747	-2.92603	-3.01463	-3.34893	-3.18964	-2.97303	-3.02076	-1.58206	-3.0903	0.00183173	0.295553
TGTTTATTGACAGGTTACAG	POLR2M	Not Significant in Both and Not Common Essential	No	0.427626	1.05481	0.35919	0.25295	0.995167	0.620703	0.000179524	0.0552743	0.817474	0.218054	0.000183759	0.000184565	1.19374	0.427626	1.59471	0.373492	0.0269112	0.282472	0.000209542	0.000182687	0.0018746	0.000176006	0.000145966	0.000134751	0.000168232	0.00017354	-0.23029	-3.3012	-0.660511	-0.085422	-0.68461	-3.29108	-3.13689	0.0790138	-3.88141	-3.31057	-1.15702	-3.20545	-4.03843	-3.44275	-2.20402	-3.21158	-1.41387	-3.0564	0.117998	0.302159
AGTGCAACAGCAGATCGCGG	CCDC120	Not Significant in Both and Not Common Essential	No	0.76463	0.310641	0.650608	1.07504	0.497583	0.451819	1.06817	0.511287	0.680822	1.79788	1.03089	0.0867457	1.13373	0.76463	0.169378	1.26987	0.242201	0.156929	0.000209542	0.000182687	0.0018746	0.000176006	0.000145966	0.00269502	0.00168232	0.00017354	0.162706	0.215321	-0.32276	0.136168	0.762502	0.199893	-1.09318	0.357644	-2.90759	-3.84205	-2.11127	-2.95018	-3.06461	-2.6732	-2.15827	-2.9563	0.0522871	-2.83293	0.0760313	0.430338
CCAGTTGCTTAACGAATATG	ACVR2A	Not Significant in Both and Not Common Essential	No	0.822685	1.36204	1.01657	0.305648	0.337911	2.66924	0.0915574	0.331646	0.00488044	0.889318	0.000183759	0.0387587	0.000214316	0.822685	0.607204	0.681624	0.894797	0.972959	0.000209542	0.000182687	0.00018746	0.000176006	0.00145966	0.000134751	0.000168232	0.0017354	0.292198	-1.04544	0.0354532	-1.84034	-0.185133	-3.74289	-0.896852	-3.19775	-3.46206	-3.57184	-3.67882	-3.74257	-2.61908	-3.70401	-3.72582	-2.74869	-1.32259	-3.40661	0.000292993	0.504687
GCTGCGGGTCTGGTACAGCG	PRDM11	Not Significant in Both and Not Common Essential	No	0.254877	0.256023	0.657385	0.421583	0.512437	0.0109665	1.29796	1.38778	0.307468	0.000213778	0.391406	1.04649	0.143592	0.254877	0.760603	0.385942	0.104281	2.50772	0.000209542	0.00365373	0.00018746	0.000176006	0.000145966	0.000134751	0.000168232	0.00017354	-1.36821	0.295442	0.517438	-0.221841	-3.07832	-0.225192	0.394852	-0.55251	-3.55989	-2.02379	-2.7453	-4.15375	-3.71691	-3.45699	-2.7923	-4.15988	-0.529792	-3.3261	0.142335	0.502861
CTGGGGGCCTCATAAAACAG	CTSL	Not Significant in Both and Not Common Essential	No	0.199653	1.53955	0.393076	0.656967	0.126252	0.712821	0.856331	0.432324	0.000244022	0.333494	0.690933	0.0572153	0.000214316	0.199653	0.0830911	0.0591363	0.245565	0.0470787	0.00209542	0.000182687	0.00018746	0.000176006	0.000145966	0.000134751	0.000168232	0.00017354	-0.334413	0.338165	-0.181734	-2.71381	-0.664306	0.244959	-1.06003	-2.77018	-1.59828	-2.51015	-3.11726	-2.4273	-2.7553	-2.64232	-3.16426	-2.43342	-0.892669	-2.58104	0.0345191	0.512659
AGCCACAGACCAGAGTCTCA	CLEC6A	Not Significant in Both and Not Common Essential	No	0.294524	0.26285	0.233812	0.435636	0.779795	0.451819	0.195681	0.635654	0.246462	0.581477	0.0606404	0.269466	0.00642947	0.294524	0.178965	0.143172	0.0807336	0.106712	0.000209542	0.000182687	0.00018746	0.000176006	0.000145966	0.00134751	0.000168232	0.00017354	0.235257	-0.0773181	0.164097	-0.50023	0.344825	-0.586105	-0.20862	-2.08381	-2.9315	-2.89415	-2.63415	-2.78269	-3.08852	-2.02633	-2.68115	-2.78881	-0.338988	-2.72841	0.0126419	0.481133
GCTGTGGGCCAAATCCCCTG	QPRT	Not Significant in Both and Not Common Essential	No	0.519665	1.44738	0.365967	0.361859	0.608983	0.307062	0.455992	0.0315853	0.185457	0.43397	0.939007	0.00184565	0.186455	0.519665	0.667925	0.666062	0.400304	0.803476	0.000209542	0.000182687	0.00018746	0.000176006	0.00145966	0.000134751	0.000168232	0.00017354	-0.673356	0.0955153	-1.05905	-0.516362	-0.523123	0.409227	-2.29239	-0.514031	-3.50346	-3.56181	-3.32948	-3.65945	-2.66048	-3.69398	-3.37648	-3.66557	-0.634197	-3.43134	0.000912356	0.181967
CTGACCTCAGGACATGCTCA	PRR23D1	Not Significant in Both and Not Common Essential	No	0.463026	1.09236	0.725157	0.295108	0.163386	3.19563	0.70553	0.286242	0.00244022	4.29695	0.0459397	0.260237	0.000214316	0.463026	0.306798	0.417067	0.208562	0.103573	0.000209542	0.000182687	0.00374919	0.000176006	0.00145966	0.000134751	0.00168232	0.0017354	0.466191	-0.0119166	-0.0132476	-1.82579	0.594795	-1.19824	-0.0546119	-2.88216	-3.16558	-3.3585	-1.7453	-2.76972	-2.3226	-3.49067	-2.09333	-1.77585	-0.615623	-2.59019	0.0106498	0.396133
CTGAAGACATGGAAGAGCAG	TMEM53	Not Significant in Both and Not Common Essential	No	0.423378	0.361846	0.182983	0.818574	0.148532	0.00438659	0.00179524	0.726462	0.00244022	0.00213778	0.000183759	0.557388	0.000214316	0.423378	0.214119	0.171184	0.124464	0.116127	0.000209542	0.000182687	0.00018746	0.000176006	0.000145966	0.000134751	0.000168232	0.00017354	-1.9164	-2.00829	-0.051845	-1.78439	-2.22856	-2.99816	-0.1669	-2.84077	-3.00938	-2.97176	-2.82214	-2.81941	-3.1664	-3.10393	-2.86914	-2.82553	-1.74941	-2.94846	0.0202863	0.191156
GACTAGTTAGAGCTATCTGA	ICE2	DepMap Common Essential	Yes	0.373819	0.4506	0.186372	0.270516	0.122539	0.0021933	0.949683	0.0118445	0.00488044	0.000213778	0.317903	0.00738262	0.000214316	0.373819	0.530505	0.208533	0.114373	0.0470787	0.000209542	0.000182687	0.00018746	0.000176006	0.000145966	0.000134751	0.000168232	0.00017354	-2.31269	0.707198	-1.35868	-1.39982	-3.32383	0.231914	-1.56398	-2.75722	-3.40342	-3.05747	-2.78541	-2.4273	-3.56044	-3.18964	-2.83241	-2.43342	-1.47214	-2.96119	0.0445033	0.393097
GAAGATCAACACAAAAACCA	ZNF791	Not Significant in Both and Not Common Essential	No	0.597544	0.426705	0.206703	1.1172	0.200519	0.842226	0.00538573	0.161875	0.0366033	0.91711	0.000183759	0.793631	0.000214316	0.597544	0.067112	0.258332	0.356573	0.307581	0.000209542	0.000182687	0.00018746	0.000176006	0.000145966	0.000134751	0.000168232	0.0017354	0.295301	-1.5841	-0.838951	-0.738635	0.332294	-3.0511	-0.148512	-2.9711	-2.50553	-3.15047	-3.27924	-3.24243	-2.66255	-3.28265	-3.32624	-2.24856	-1.0881	-2.96221	0.0206934	0.482589
CTTCAATGAACCAATAAACC	IPO11	DepMap Common Essential	Yes	0.41913	0.102409	0.447293	0.0772902	0.118826	0.0943118	0.114896	0.915973	0.00244022	0.0128267	0.000183759	0.151344	0.000214316	0.41913	0.115049	0.0933731	0.0908253	0.251086	0.000209542	0.000182687	0.00018746	0.000176006	0.000145966	0.000134751	0.000168232	0.00017354	-0.0357721	-0.590287	1.07376	-1.68748	-0.902223	-3.38634	0.291841	-2.74386	-2.73961	-2.70851	-2.6853	-3.1543	-2.89663	-2.84069	-2.7323	-3.16042	-0.997546	-2.86472	0.0382135	0.612611
TATTACTGCACATCATGCTG	APOBEC3G	Not Significant in Both and Not Common Essential	No	0.6202	0.662246	0.83698	0.467255	0.293351	0.478139	0.220815	0.702773	0.000244022	0.587891	0.102905	0.616449	0.00214316	0.6202	0.94596	0.161847	0.285931	0.342105	0.000209542	0.000182687	0.00018746	0.000176006	0.000145966	0.000134751	0.00168232	0.00017354	-0.141465	-0.578687	0.177261	-3.07996	-0.0517225	-0.910279	0.120343	-2.13633	-3.6546	-2.9474	-3.18335	-3.28863	-3.81162	-3.07957	-2.23035	-3.29476	-0.825105	-3.18629	0.0284781	0.113968
ATGCTTTAATGTGTGCAATT	MRPS11	DepMap Common Essential	Yes	0.555065	0.235541	1.4537	0.122962	0.542143	0.00021933	0.423677	0.000197408	0.263544	0.000213778	0.441021	0.000184565	0.16288	0.555065	0.380302	0.463753	0.117736	0.13182	0.000209542	0.000182687	0.00018746	0.000176006	0.000145966	0.000134751	0.000168232	0.00017354	-3.03097	-0.53544	-2.79441	-0.313261	-3.0421	-0.518016	-2.82362	-0.522246	-3.25886	-3.40458	-2.798	-2.87445	-3.41588	-3.53675	-2.845	-2.88058	-1.69751	-3.12676	0.0201439	0.148735
GTCGTCCAGGATGTCGAACA	SAPCD2	Not Significant in Both and Not Common Essential	No	0.169918	0.129718	0.0474401	1.18395	0.181952	0.00021933	0.00179524	0.315853	2.02782	0.000213778	0.00183759	0.487253	1.51736	0.169918	0.121441	0.0529114	0.272476	0.342105	0.000209542	0.000182687	0.0018746	0.00176006	0.000145966	0.000134751	0.000168232	0.00017354	-2.7719	-1.42202	-0.573848	1.04707	-2.78304	-1.4119	-0.385579	0.921132	-2.76309	-2.46184	-2.16242	-2.28863	-2.92011	-2.59402	-3.20942	-3.29476	-0.92251	-2.71179	0.0210989	0.577376
CGGCCACTTGTAGATAAACA	ENTPD2	Not Significant in Both and Not Common Essential	No	0.235053	0.0751001	0.498122	0.0526979	0.0408464	0.00021933	0.576273	2.07871	0.00488044	0.00213778	0.11393	1.41193	0.00214316	0.235053	0.0287623	0.0591363	0.174923	0.081603	0.000209542	0.000182687	0.00018746	0.00176006	0.000145966	0.000134751	0.00168232	0.00017354	-2.53454	0.0632925	1.596	-0.922695	-1.54568	-0.640698	1.42802	-1.2801	-2.13755	-2.51015	-2.96994	-1.66618	-2.29457	-2.64232	-2.01694	-2.67231	-0.47955	-2.36374	0.0401634	0.277538
GCGTTCTACACCATTTGGAG	QPCTL	Not Significant in Both and Not Common Essential	No	0.270452	0.215059	0.0576059	0.249437	0.597843	0.00021933	0.242358	0.000197408	1.41777	0.000213778	0.139657	0.000184565	0.904413	0.270452	0.210924	0.124497	0.178287	0.0313858	0.000209542	0.000182687	0.00018746	0.000176006	0.000145966	0.000134751	0.00168232	0.00017354	-2.99146	0.62399	-3.1016	0.375019	-3.00259	0.384596	-3.13081	0.17978	-3.00285	-2.83345	-2.97821	-2.25121	-3.15987	-2.96563	-2.02521	-2.25733	-1.33288	-2.68422	0.0159453	0.779173
ACAGTTTATTCTTGGAACCG	SLC4A10	Not Significant in Both and Not Common Essential	No	0.213813	0.491564	0.38291	0.274029	0.0816928	0.21933	0.531392	0.000197408	0.122011	0.0363423	0.363842	0.000184565	0.0150021	0.213813	0.309994	0.130722	0.232109	0.0878802	0.000209542	0.000182687	0.00018746	0.000176006	0.000145966	0.000134751	0.000168232	0.00017354	-0.350482	0.142318	-3.14243	0.174215	-1.13117	-0.0221839	-3.17165	-0.736032	-3.17008	-2.85464	-3.09278	-2.69836	-3.3271	-2.98682	-3.13978	-2.70449	-1.02968	-2.99676	0.00758878	0.225268
TTACAGATTCAATACCGAAG	CAPN13	Not Significant in Both and Not Common Essential	No	0.501257	0.331123	0.193149	0.5059	0.126252	0.743528	0.0700145	1.42726	0.000244022	0.33777	0.395081	1.18491	0.00428632	0.501257	0.575246	0.105823	0.151375	0.0972959	0.000209542	0.000182687	0.00018746	0.000176006	0.000145966	0.000134751	0.00168232	0.0017354	0.351308	-0.440704	0.450438	-2.71381	0.00863173	0.310794	0.369621	-1.46915	-3.43858	-2.76287	-2.90715	-2.74257	-3.5956	-2.89505	-1.95415	-1.74869	-0.391609	-2.75558	0.0515141	0.389135
GTGTGCAAAGATGAATCCGT	DGCR8	DepMap Common Essential	Yes	0.247797	0.249196	0.0881031	0.17566	0.204232	0.00021933	0.00359049	0.805425	0.000244022	0.000213778	0.000183759	0.478024	0.000214316	0.247797	0.150203	0.224095	0.497857	0.0878802	0.000209542	0.000182687	0.00018746	0.000176006	0.000145966	0.000134751	0.000168232	0.00017354	-3.05544	-1.38984	0.661352	-2.92269	-3.06658	-2.68074	0.434777	-2.97907	-2.85541	-3.08872	-3.4242	-2.69836	-3.01243	-3.2209	-3.4712	-2.70449	-1.87478	-3.05946	0.0260887	0.784926
GGGAAAACGAGCCTCCGGGG	EGR4	Not Significant in Both and Not Common Essential	No	0.42621	0.512046	0.240589	0.305648	0.111399	3.45444	0.0341096	0.000197408	0.00244022	2.53969	0.000183759	0.000184565	0.00428632	0.42621	0.201336	0.354818	0.228745	0.489618	0.00209542	0.000182687	0.00018746	0.000176006	0.000145966	0.000134751	0.00336465	0.00017354	0.829069	-0.848399	-3.18986	-1.65945	0.695472	-3.11703	-3.21907	-1.4148	-1.98265	-3.2883	-3.08644	-3.44433	-3.13967	-3.42047	-1.83241	-3.45046	-1.49051	-2.95559	0.00362593	0.413488
GCGGATGTAGTGTGTCCGCG	HECW1	Not Significant in Both and Not Common Essential	No	0.148678	0.228714	0.426961	1.60904	0.237652	0.201783	1.29078	2.89005	0.000244022	0.130405	1.70712	1.85857	0.000214316	0.148678	0.0990701	0.401504	0.164831	0.0251086	0.00419084	0.000182687	0.00018746	0.000176006	0.000145966	0.000134751	0.000168232	0.00347079	-0.0544082	0.480464	0.254339	-2.98851	-0.243999	0.601876	0.0626121	-3.04489	-1.37364	-3.34198	-2.94413	-2.1543	-2.83169	-3.47416	-2.99113	-0.859394	-0.616564	-2.4963	0.0578555	0.3314
CTGCAGTGCCTCATTTGAGG	TTC1	DepMap Common Essential	Yes	0.658431	0.279918	0.365967	0.435636	0.523577	0.00021933	1.16332	1.13312	0.263544	0.00213778	0.775462	1.20521	0.587225	0.658431	0.556071	0.348593	0.339754	0.166345	0.000209542	0.000182687	0.00018746	0.000176006	0.000145966	0.00269502	0.000168232	0.0017354	-3.10593	0.502257	0.415152	-0.298127	-2.11707	0.326119	0.441939	0.049824	-3.42386	-3.28061	-3.25826	-2.97548	-3.58088	-2.11176	-3.30526	-1.98161	-0.47323	-2.98971	0.0089442	0.35136
AATTTAAAAAGCGCCCTCGG	GCNT1	Not Significant in Both and Not Common Essential	No	0.304436	0.286746	0.203315	0.983694	0.52729	0.107472	0.0394953	4.08635	0.229381	0.00213778	0.154357	4.32437	0.00214316	0.304436	0.124637	0.146285	0.161467	0.0313858	0.000209542	0.00365373	0.00018746	0.00176006	0.000145966	0.000134751	0.00336465	0.00017354	-0.426202	-0.711624	0.618476	-0.361492	-2.12753	-0.119643	0.643063	-2.39099	-2.77438	-1.60246	-2.93518	-1.25121	-2.9314	-3.03567	-1.68114	-2.25733	-0.609494	-2.3086	0.0256239	0.369708
GAGGATCCCGTGCACGAGTG	DGKQ	Not Significant in Both and Not Common Essential	No	0.199653	0.163855	0.128766	0.597243	0.523577	0.00021933	0.0215429	0.341516	0.561251	0.00213778	0.000183759	0.474333	1.63094	0.199653	0.0351539	0.258332	0.0504585	0.147513	0.00209542	0.000182687	0.00018746	0.000176006	0.000145966	0.000134751	0.000168232	0.00017354	-2.87336	-0.776497	-0.24274	0.0301766	-1.8845	-2.84555	-0.100068	0.493457	-1.2247	-3.15047	-2.43003	-2.9233	-2.38172	-3.28265	-2.47703	-2.92943	-1.02489	-2.59992	0.0322471	0.802944
TCAGAGCTGGTCTTGCGAGG	B3GALT4	Not Significant in Both and Not Common Essential	No	0.239301	0.208232	0.281252	0.091343	0.924614	0.0021933	0.224405	0.825166	0.309908	0.000213778	0.172733	1.11293	0.0364337	0.239301	0.0990701	0.0560239	0.0639141	0.295026	0.000209542	0.000182687	0.00018746	0.000176006	0.000145966	0.000134751	0.00168232	0.00017354	-1.97745	-0.0980631	0.955866	-0.474728	-2.98858	-0.21172	1.08579	-1.40446	-2.67467	-2.48667	-2.53269	-3.22433	-2.83169	-2.61884	-1.57969	-3.23046	-0.639168	-2.64738	0.0371767	0.949588
ACAGGAAGTCTATGTACAGG	CYP4F3	Not Significant in Both and Not Common Essential	No	0.335588	0.0648591	0.240589	0.470768	0.0297065	0.0175464	4.41809	0.098704	0.00244022	0.00213778	7.80791	0.38205	0.00214316	0.335588	0.159791	0.0373492	0.00033639	0.238532	0.00209542	0.000182687	0.00374919	0.000176006	0.00291933	0.00269502	0.000168232	0.0017354	-0.567783	1.26396	-0.678472	-1.08542	-1.48201	1.51126	-0.0906867	-1.1418	-1.88228	-2.31057	1.04709	-3.13202	-1.73827	-1.14172	-0.300934	-2.13815	-0.283869	-1.44961	0.0701778	0.231506
CTACAGAACCTGTAGCAACA	DGUOK	Not Significant in Both and Not Common Essential	No	0.427626	0.699796	0.657385	0.129988	0.200519	0.0438659	0.375206	0.00592224	0.000244022	0.000213778	0.850803	0.00184565	0.000214316	0.427626	0.559267	0.239658	0.104281	0.323274	0.000209542	0.000182687	0.00018746	0.000176006	0.000145966	0.000134751	0.000168232	0.00017354	-1.20284	-0.24355	-1.34142	-2.91473	-3.51501	0.112009	-1.84775	-2.9711	-3.42635	-3.11788	-2.7453	-3.26404	-3.58337	-3.25006	-2.7923	-3.27017	-1.74055	-3.18118	0.0131932	0.12859
GCTTCCACCATTGCAATCCG	PSD4	Not Significant in Both and Not Common Essential	No	0.246381	0.631523	0.321915	0.0843166	0.207945	0.761074	0.000179524	0.000197408	0.000244022	0.515206	0.000183759	0.000184565	0.000214316	0.246381	0.115049	0.180521	0.309479	0.128682	0.000209542	0.000182687	0.00018746	0.000176006	0.000145966	0.000134751	0.000168232	0.00017354	0.0810377	-3.25362	-2.63055	-2.93052	-0.0884083	-3.24349	-2.65976	-2.98689	-2.73961	-2.99482	-3.21772	-2.86399	-2.89663	-3.127	-3.26472	-2.87012	-2.21403	-2.99683	0.0058612	0.346303
CCTTGGCTGCAAAAGGAAGA	SPDYE3	Significant in Both and Not Common Essential	No	0.72215	0.235541	0.891197	0.389964	0.456737	0.723788	0.1131	0.000197408	0.0268424	0.412592	0.000183759	0.000184565	0.000214316	0.72215	0.271644	1.16094	0.571863	0.288749	0.000209542	0.000182687	0.00018746	0.000176006	0.000145966	0.000134751	0.000168232	0.00017354	0.487545	-0.896511	-3.29566	-1.23084	0.243454	-3.68573	-3.32488	-3.32861	-3.11273	-3.8031	-3.48438	-3.21499	-3.26975	-3.93528	-3.53138	-3.22112	-1.8789	-3.44659	0.0210894	0.0342218
TACCGAAGTCAATGTCGAGG	ADSSL1	Not Significant in Both and Not Common Essential	No	0.951539	2.18473	0.576059	0.481307	1.79353	0.684309	1.30514	0.165823	0.531968	0.220192	0.920631	0.0498327	0.0835832	0.951539	0.719058	0.591363	0.548316	0.345244	0.000209542	0.000182687	0.00018746	0.00176006	0.00145966	0.000134751	0.000168232	0.00017354	-0.504146	0.35519	-0.462777	-0.527823	-0.996596	0.203619	-0.984908	-1.33159	-3.53549	-3.51015	-3.46612	-2.2926	-2.69251	-3.64232	-3.51312	-3.29873	-0.531129	-3.24388	0.00325045	0.111141
AAGAGCAAAGACCACAACGC	TSPAN1	Not Significant in Both and Not Common Essential	No	0.572056	0.191164	0.0948803	0.0105396	0.620123	0.00021933	0.00897621	0.000197408	2.00586	0.00855114	0.00367518	0.00369131	3.61765	0.572056	0.271644	0.155622	0.41376	0.0627716	0.000209542	0.00182687	0.00018746	0.000176006	0.000145966	0.000134751	0.00168232	0.0017354	-2.94031	-1.02408	-1.72746	0.509823	-1.34938	-1.4119	-0.455644	0.765949	-3.11273	-1.93036	-3.34384	-2.55224	-3.26975	-3.06254	-2.39084	-1.55836	-0.954125	-2.65258	0.0315647	0.438042
AGCCACATCTGAGAGCGTCG	ABCD4	Not Significant in Both and Not Common Essential	No	0.344083	0.344778	0.321915	0.0597243	0.427031	0.140371	0.461377	0.0197408	0.000244022	0.262947	0.391406	0.000184565	0.000214316	0.344083	0.204532	0.12761	0.8107	0.0564944	0.000209542	0.000182687	0.00018746	0.000176006	0.000145966	0.000134751	0.000168232	0.00017354	-0.390262	0.156315	-0.480786	-3.24303	-0.117671	0.0848863	-2.51	-3.2994	-2.98949	-2.84418	-3.63595	-2.50648	-3.14651	-2.97635	-3.68295	-2.51261	-1.22499	-3.03681	0.0831319	0.156429
GAATTCTACTAAGTATCAGT	MRPL48	Not Significant in Both and Not Common Essential	No	0.555065	0.846583	0.233812	0.548058	0.263645	0.831259	0.359049	0.100678	0.507566	0.444659	0.084529	0.00553696	0.505785	0.555065	0.584833	0.192971	0.0840975	0.649686	0.000209542	0.000182687	0.0018746	0.000176006	0.000145966	0.000134751	0.000168232	0.00017354	-0.00793318	0.186287	-0.735892	0.284473	-0.279642	-0.441861	-1.99556	0.282946	-3.44576	-3.02378	-1.65187	-3.56718	-3.60278	-3.15596	-2.69887	-3.5733	-0.338397	-3.08994	0.0226419	0.389578
CGCCGCCTACCACATGACGG	NKX2-1	Not Significant in Both and Not Common Essential	No	0.184078	0.116064	0.0745488	0.0316187	0.0631262	0.0021933	0.00179524	5.5906	0.043924	0.00213778	0.00918794	8.48263	0.00214316	0.184078	0.172574	0.0529114	0.0538224	0.841139	0.000209542	0.000182687	0.00018746	0.00528017	0.00291933	0.00134751	0.00168232	0.00347079	-1.7236	-1.61832	2.24751	-0.157508	-1.73473	-0.909223	2.42859	-1.46916	-2.9157	-2.46184	-2.45805	-2.20222	-1.77169	-1.59402	-1.50505	-2.38444	-0.367055	-2.16163	0.154458	0.199938
GGTGCGCAGTCCACGCAGCG	DPP7	Not Significant in Both and Not Common Essential	No	0.195405	0.761242	0.349024	0.298621	0.308205	5.59729	0.00538573	0.000197408	0.000244022	5.32308	0.000183759	0.00184565	0.000214316	0.195405	0.0766995	0.0809234	0.0370029	0.0784645	0.00209542	0.000182687	0.00018746	0.00176006	0.000145966	0.00404253	0.00168232	0.0017354	0.866455	-1.81161	-3.17976	-3.10141	0.84464	-3.27861	-2.20897	-3.15779	-1.56352	-2.64637	-2.29533	-1.64915	-2.72054	-1.30142	-1.34233	-1.65527	-1.87838	-1.89674	0.0259052	0.309402
TTCATGGATGTGAAATGCCC	RPS27	Not Significant in Both and Not Common Essential	No	0.72923	0.276505	0.332081	0.309161	0.378757	0.155724	0.00718097	0.000197408	0.890681	0.0149645	0.000183759	0.000184565	0.2036	0.72923	0.226903	0.445079	0.67278	0.222839	0.000209542	0.000182687	0.00018746	0.000176006	0.000145966	0.000134751	0.000168232	0.00017354	-0.249347	-1.66506	-3.19482	0.371362	-1.26664	-3.257	-3.22404	-0.269583	-3.03457	-3.38673	-3.55496	-3.10246	-3.19159	-3.51891	-3.60196	-3.10859	-1.59439	-3.31247	0.012691	0.0983901
CGATGGCAGCCATGTCACTG	DVL3	Not Significant in Both and Not Common Essential	No	0.438954	0.368673	0.105046	0.446175	0.638689	0.671149	1.49364	0.000197408	0.00976088	0.348459	1.41494	0.00184565	0.00642947	0.438954	0.178965	0.25522	0.154739	0.191453	0.000209542	0.000182687	0.0018746	0.000176006	0.000145966	0.00134751	0.000168232	0.00017354	0.260178	1.15287	-3.35414	-1.8158	-0.0244896	1.12936	-2.38336	-1.99711	-2.9315	-3.14521	-1.91669	-3.03653	-3.08852	-2.27738	-2.96369	-3.04266	-0.879062	-2.80027	0.0091518	0.70725
GCAGTCCATACCTGTAACAT	NCBP1	DepMap Common Essential	Yes	0.642855	0.51546	0.487956	1.17692	0.709242	1.12516	0.238767	0.00197408	1.20059	1.77436	0.192947	0.00184565	0.752248	0.642855	0.351539	0.519777	0.376757	1.14872	0.000209542	0.000182687	0.00018746	0.00176006	0.00291933	0.000134751	0.000168232	0.00017354	0.339019	-0.310406	-2.77538	0.2286	0.536847	-0.402943	-2.8046	0.0255666	-3.2247	-3.45411	-3.30315	-2.81469	-2.08069	-3.58629	-3.35015	-3.82081	-0.645412	-3.20432	0.013839	0.866295
AGGTTGACAAGGTCACAGGC	RPS21	DepMap Common Essential	Yes	0.409219	0.105823	0.0948803	0.0562111	0.0222799	2.74162	0.000179524	0.00197408	0.000244022	0.262947	0.00183759	0.000184565	0.000214316	0.409219	0.0415455	0.177409	0.00033639	0.0345244	0.00209542	0.000182687	0.00018746	0.000176006	0.000145966	0.000134751	0.000168232	0.00017354	1.41343	-2.72305	-1.45446	-1.96048	0.395288	-1.71293	-2.48367	-2.01686	-1.29725	-2.98727	-0.253934	-2.2926	-2.45427	-3.11944	-0.300934	-2.29873	-1.31784	-1.87555	0.154734	0.511851
TTATGAGAACGTCCGCGCCA	RAC2	Not Significant in Both and Not Common Essential	No	0.338419	0.105823	0.443904	0.312674	0.048273	0.320221	0.00359049	4.49301	0.000244022	0.0748225	0.00367518	7.81081	0.00428632	0.338419	0.0926785	0.560239	0.148012	0.15379	0.000209542	0.000182687	0.00374919	0.000176006	0.00291933	0.00134751	0.00504697	0.00017354	0.48087	-2.09214	1.15745	-2.29628	-0.150548	-2.08201	1.3976	-1.05162	-2.64571	-3.48667	-1.59636	-2.9414	-1.5017	-2.61884	-1.46727	-2.94753	-0.579584	-2.40068	0.0405193	0.24141
AAGCCTGAAAGAACAACCAA	ADAM32	Not Significant in Both and Not Common Essential	No	0.44745	0.221887	0.108435	0.470768	0.389897	0.0438659	0.000179524	4.13965	0.575892	0.00641335	0.00183759	4.48863	0.222888	0.44745	0.0990701	0.519777	0.19847	0.112989	0.000209542	0.000182687	0.00018746	0.00176006	0.00145966	0.00134751	0.00168232	0.00347079	-0.704005	-2.78105	0.944157	0.169391	-1.53905	-1.77092	0.979307	-0.242863	-2.67467	-3.45411	-3.02479	-1.80751	-1.83169	-2.58629	-2.07179	-1.51261	-0.618129	-2.37043	0.0348902	0.253718
TCCACCTCAAAGGCATATGA	CDAN1	DepMap Common Essential	Yes	0.533825	0.624696	0.50151	0.449689	0.441884	0.877319	0.612178	0.128315	0.00732066	0.309979	0.442859	0.00553696	0.000214316	0.533825	0.309994	0.239658	0.999078	0.480202	0.000209542	0.000182687	0.00018746	0.000176006	0.000145966	0.00134751	0.000168232	0.00017354	0.147489	0.0865981	-0.544635	-1.78076	-0.304336	-0.0540141	-1.90964	-3.31425	-3.17008	-3.11788	-3.72669	-3.4359	-3.3271	-2.25006	-3.77369	-3.44202	-0.959194	-3.28043	0.0182756	0.113902
GGCCGACAGCCTGTCCACCG	IRF2BP2	Not Significant in Both and Not Common Essential	No	0.212397	0.334537	0.0203315	0.288082	0.686962	0.0021933	0.00359049	3.8692	0.412397	0.000213778	0.00918794	5.64955	0.372909	0.212397	0.0990701	0.0217871	0.124464	0.0439401	0.00419084	0.000182687	0.00018746	0.000176006	0.000145966	0.00269502	0.000168232	0.00347079	-2.18335	-0.753016	1.12811	-0.221617	-3.19448	-0.344951	1.2925	-0.26533	-1.37364	-2.07649	-2.82214	-2.39733	-2.83169	-0.907637	-2.86914	-1.10243	-0.567767	-2.04756	0.0419532	0.250194
CCTGATCCGCCGCTTCACCG	RAB39B	Not Significant in Both and Not Common Essential	No	0.297356	0.109236	0.298195	0.512926	0.107686	0.410146	1.32668	0.444168	0.00732066	0.000213778	1.53439	0.136578	0.0535789	0.297356	0.0319581	0.124497	0.248929	0.376629	0.000209542	0.000182687	0.00018746	0.000176006	0.00145966	0.000134751	0.000168232	0.0017354	0.574573	0.648266	-0.0625074	-1.16761	-2.7084	0.711435	-0.574674	-0.303165	-2.18331	-2.83345	-3.12317	-3.33039	-1.34033	-2.96563	-3.17017	-2.33651	-0.360261	-2.66037	0.024916	0.351983
GTGGCCATAGCTCCGAATGC	HS2ST1	Not Significant in Both and Not Common Essential	No	0.257709	0.167268	0.040663	0.17566	0.308205	0.146951	0.58884	0.0592224	0.000244022	0.200952	0.270125	0.000184565	0.000214316	0.257709	0.460197	0.0280119	0.0437307	0.0690487	0.000209542	0.000182687	0.00018746	0.000176006	0.000145966	0.000134751	0.000168232	0.00017354	-0.0562403	1.1608	-0.472187	-3.10141	0.0796795	0.822365	-2.97852	-3.15779	-3.34167	-2.18563	-2.36788	-2.59363	-3.49869	-2.31781	-2.41488	-2.59976	-0.962913	-2.66499	0.107959	0.716446
CCTTGGCGTATTTCCTAGTG	TMC3	Not Significant in Both and Not Common Essential	No	0.594712	0.542769	0.528619	0.537518	1.18826	0.0307062	1.28719	0.373101	2.03758	0.00213778	0.926144	0.186411	1.8174	0.594712	0.425043	0.51044	0.27584	0.160067	0.000209542	0.000182687	0.00018746	0.00176006	0.000145966	0.00134751	0.00168232	0.0017354	-1.24739	0.3865	-0.158567	0.234203	-2.40465	0.243536	-0.459921	0.184539	-3.30716	-3.44624	-3.16775	-1.95877	-3.46418	-2.57841	-2.21475	-1.9649	-0.402719	-2.76277	0.00752914	0.634431
GGTAGGGCTTCTGTGCCGCG	ZNF668	Not Significant in Both and Not Common Essential	No	0.320012	0.307228	0.213481	0.537518	0.534716	0.00021933	0.000179524	0.606043	0.634457	0.00213778	0.000183759	0.73457	0.722244	0.320012	0.246077	0.214758	0.0874614	0.0470787	0.000209542	0.000182687	0.00018746	0.000176006	0.000145966	0.000134751	0.000168232	0.0017354	-3.14636	-3.07524	0.0521104	0.074279	-2.1575	-3.06511	0.13564	0.130561	-3.0698	-3.07024	-2.66891	-2.4273	-3.22682	-3.20242	-2.71591	-1.43342	-1.38145	-2.72685	0.0226478	0.760429
CCAACAAGGGGTGCCAACAA	OXSR1	Not Significant in Both and Not Common Essential	No	0.232221	0.0409637	0.247366	0.347806	0.0594129	0.0021933	0.00179524	0.613939	0.424598	0.000213778	0.000183759	0.129196	0.0921558	0.232221	0.0766995	0.0373492	0.0470946	0.414292	0.000209542	0.000182687	0.00018746	0.000176006	0.000145966	0.000134751	0.000168232	0.00017354	-1.2713	-2.13922	0.246788	0.854097	-2.28244	-3.12909	-0.430088	0.190642	-2.56352	-2.31057	-2.40006	-3.37178	-2.72054	-2.44275	-2.44706	-3.37791	-0.995076	-2.70427	0.0894879	0.7912
TCAAGGCCTCTGAGCATCCG	CCDC88B	Not Significant in Both and Not Common Essential	No	0.273284	0.406223	0.59639	0.425096	0.144819	0.0394793	0.0323144	1.78457	0.163495	0.0171023	0.0110255	1.77921	0.0578653	0.273284	0.712666	0.722085	0.31957	0.138097	0.000209542	0.00182687	0.00018746	0.000176006	0.000145966	0.00134751	0.000168232	0.00017354	-1.0124	-1.26613	0.623047	0.0526789	-1.37571	-1.73313	0.62174	-0.398407	-3.53161	-2.59688	-3.23166	-2.89466	-3.68863	-2.72906	-3.27866	-2.90078	-0.561039	-3.10649	0.022545	0.701801
TGAGGGGTAGGGATAACCGG	AP3M2	Not Significant in Both and Not Common Essential	No	0.250629	0.669073	0.0677716	0.67102	0.337911	5.55781	0.00179524	0.856751	0.00488044	7.21288	0.000183759	0.29715	0.00214316	0.250629	0.0479372	0.463753	0.255656	0.583776	0.000209542	0.00365373	0.00018746	0.00352011	0.00437899	0.00134751	0.000168232	0.0017354	0.91943	-1.57693	0.106119	-1.84034	1.03264	-2.5668	-0.35376	-2.19775	-2.3594	-2.10355	-3.13475	-2.21969	-1.0393	-2.53675	-3.18175	-2.52685	-0.809674	-2.38775	0.0267318	0.235671
CCCTTATAATCAGTGTGCAG	ST8SIA6	Not Significant in Both and Not Common Essential	No	0.31718	0.0751001	1.42659	0.133501	0.371331	0.0021933	0.506258	0.00789632	0.065886	0.000213778	0.218673	0.000184565	0.460779	0.31718	0.290819	0.684736	0.326298	0.495895	0.000209542	0.000182687	0.00018746	0.000176006	0.000145966	0.000134751	0.000168232	0.00017354	-1.53454	-0.449927	-1.22806	-0.750968	-2.54568	-0.814504	-2.85934	0.0937315	-3.14235	-3.57382	-3.24071	-3.44986	-3.29937	-3.70599	-3.28771	-3.45599	-1.26116	-3.39447	0.00482115	0.290107
CAGTTTAGCATGATACAACC	DCAF16	Not Significant in Both and Not Common Essential	No	0.59188	0.522287	1.14195	0.389964	0.0259932	2.10776	1.17588	0.000197408	0.22206	2.55465	0.452047	0.00184565	0.327903	0.59188	0.194944	0.149397	0.0639141	0.316996	0.000209542	0.000182687	0.00018746	0.00176006	0.00145966	0.000134751	0.00336465	0.00017354	0.605912	0.0127159	-3.29566	0.931611	0.689422	-0.402463	-2.32488	1.10089	-2.96864	-2.91263	-2.53269	-2.25553	-2.12566	-3.04481	-1.27866	-3.26165	-0.335307	-2.54753	0.0458405	0.434218
CAGACAACCAGACTGAAGAG	KCNE3	Not Significant in Both and Not Common Essential	No	0.753302	0.931924	0.233812	0.228358	0.508723	0.916798	0.00179524	0.0533002	0.44656	0.731122	0.000183759	0.000184565	0.542219	0.753302	0.278036	0.314356	0.19847	0.0941573	0.000209542	0.000182687	0.00018746	0.000176006	0.000145966	0.000134751	0.000168232	0.0017354	-0.00710684	-2.11474	-0.631887	-0.0566016	-0.105391	-3.10462	-3.09247	0.0276934	-3.12283	-3.23571	-3.02479	-2.72833	-3.27985	-3.36789	-3.07179	-1.73445	-1.13564	-2.9457	0.0441864	0.334293
GCAGCTGTGATCACCCAAAG	PRSS58	Not Significant in Both and Not Common Essential	No	0.176998	0.153614	0.50151	0.576164	0.44931	0.00021933	0.0987383	0.00789632	0.949246	0.000213778	0.0661531	0.000184565	0.139305	0.176998	0.6104	0.0529114	0.161467	0.059633	0.000209542	0.000182687	0.00018746	0.000176006	0.000145966	0.000134751	0.000168232	0.00017354	-2.84533	-0.705794	-1.86312	0.324833	-2.85647	-0.879729	-3.4944	-0.508579	-3.46434	-2.46184	-2.93518	-2.52996	-3.62136	-2.59402	-2.98218	-2.53609	-1.60357	-2.89062	0.107847	0.164878
AGACGCTATCCACGTCGTAG	YBX1	DepMap Common Essential	Yes	0.0339835	0.484737	0.00338858	0.000351319	0.000371331	1.7678	0.000179524	0.000197408	0.000244022	1.98386	0.00183759	0.000184565	0.000214316	0.0339835	0.0479372	0.000311244	0.00033639	0.000313858	0.000209542	0.000182687	0.00018746	0.000176006	0.000145966	0.00134751	0.00168232	0.00017354	0.561927	-1.2759	-0.250337	-0.182332	0.612005	-0.265769	-0.279552	-0.238707	-2.3594	-0.231393	-0.253934	-0.251206	-2.51642	0.636431	0.699066	-0.257334	-0.164833	-0.566774	0.190301	0.289095
AAAACATAGAAAAACGTGTG	CADPS2	Not Significant in Both and Not Common Essential	No	0.210981	0.0102409	0.0745488	0.0140528	0.126252	0.00021933	0.348277	0.00592224	0.485604	0.000213778	0.198459	0.000184565	0.220745	0.210981	0.0447414	0.00311244	1.35902	0.0972959	0.000209542	0.000182687	0.00018746	0.000176006	0.000145966	0.000134751	0.000168232	0.00017354	-1.66924	0.669484	-0.375277	0.585044	-1.68038	0.42523	-1.88161	0.242653	-2.32944	-1.23139	-3.86032	-2.74257	-2.48646	-1.36357	-3.90732	-2.74869	-0.460512	-2.58372	0.252098	0.378314
CGATCAAGGCAAAAACACTC	SCN8A	Not Significant in Both and Not Common Essential	No	0.59188	0.204818	0.149098	0.0632375	0.360191	0.00021933	0.73964	0.000197408	0.000244022	0.000213778	0.516362	0.00184565	0.000214316	0.59188	0.115049	0.0342368	0.356573	0.112989	0.000209542	0.000182687	0.00018746	0.000176006	0.000145966	0.000134751	0.000168232	0.00017354	-2.97027	0.695549	-2.50561	-3.1691	-2.98141	0.539482	-1.53483	-3.22548	-2.73961	-2.27279	-3.27924	-2.80751	-2.89663	-2.40496	-3.32624	-2.81364	-1.89396	-2.81758	0.0782412	0.424207
GTTGATTGAGAAATGTAACA	PSME3	Not Significant in Both and Not Common Essential	No	0.359659	0.648591	0.216869	1.05747	0.256218	0.820293	0.000179524	1.28513	0.297707	0.391215	0.00367518	1.48575	0.199314	0.359659	0.380302	0.812346	0.0773697	0.345244	0.00209542	0.00182687	0.00018746	0.000176006	0.000145966	0.000134751	0.000168232	0.00017354	0.101998	-3.08207	0.084679	0.0651794	-0.219555	-1.77092	0.147678	-0.109072	-2.25886	-2.64803	-2.61566	-3.2926	-3.41588	-3.78021	-2.66266	-3.29873	-0.597761	-2.99658	0.0288633	0.840992
CACGCGCCCCTCGAAGCCCG	SCO1	Not Significant in Both and Not Common Essential	No	0.191157	0.317468	0.352413	0.404017	1.07315	0.0021933	0.0215429	0.0513261	1.63983	0.000213778	0.000183759	0.00184565	2.16673	0.191157	0.623183	0.522889	0.067278	0.134959	0.000209542	0.000182687	0.00018746	0.000176006	0.00145966	0.000134751	0.000168232	0.0017354	-2.1606	-1.21375	-0.896061	0.184138	-3.17174	-3.2828	-2.34025	0.305144	-3.47334	-3.4567	-2.55496	-2.88467	-2.63036	-3.58888	-2.60196	-1.8908	-1.57199	-2.88521	0.0505669	0.960346
CTCCTCGCGGGTAACCTGCG	SP6	Not Significant in Both and Not Common Essential	No	0.685335	0.822687	0.372744	0.238897	0.694389	3.60578	0.0430858	0.00197408	1.29088	2.80477	0.00183759	0.000184565	2.17531	0.685335	0.354735	0.311244	0.41376	0.200869	0.00419084	0.000182687	0.00018746	0.000176006	0.00291933	0.00134751	0.000168232	0.0017354	0.641765	-0.937077	-2.08285	0.269283	0.532663	-2.30716	-3.11206	0.495918	-1.9276	-3.23139	-3.34384	-3.05739	-2.08462	-2.36357	-3.39084	-2.06351	-0.81244	-2.68285	0.00838503	0.237276
GAATTGCTGCTGGGACCCCG	MPLKIP	Not Significant in Both and Not Common Essential	No	0.237885	0.481323	0.115212	0.277542	0.594129	0.236876	0.00179524	1.98987	0.0170815	0.0577202	0.00183759	1.85304	0.000214316	0.237885	0.246077	0.283232	0.13792	0.44254	0.000209542	0.00182687	0.00018746	0.000176006	0.000145966	0.000134751	0.000168232	0.0017354	-0.307916	-1.80738	0.855496	-1.54135	-0.921109	-1.79725	0.824556	-3.44283	-3.0698	-2.19043	-2.86672	-3.40043	-3.22682	-3.32261	-2.91372	-2.40655	-1.01722	-2.92463	0.00556387	0.591163
GAAGAATGTACGCTTTGACC	CSRNP2	Not Significant in Both and Not Common Essential	No	0.260541	0.273091	0.0135543	0.263489	0.048273	5.04239	0.00359049	0.000197408	0.00244022	7.68106	0.00183759	0.000184565	0.00214316	0.260541	0.0607204	0.292569	0.0840975	0.0564944	0.00209542	0.00182687	0.00374919	0.00176006	0.00291933	0.00134751	0.000168232	0.00017354	1.26633	-0.576923	-3.1254	-1.29628	1.44911	-0.867828	-3.15461	-1.35265	-1.46206	-2.20452	-1.35085	-1.50648	-1.31805	-2.3367	-2.69887	-2.51261	-0.957281	-1.92377	0.0449774	0.226649
GGACGTGAGTTTCAGCACGC	NKX2-5	Not Significant in Both and Not Common Essential	No	0.2747	0.221887	0.0779374	2.03765	0.100259	0.0109665	0.000179524	0.797529	0.000244022	0.000213778	0.000183759	0.439266	0.000214316	0.2747	0.00639162	0.0746985	0.232109	0.740704	0.000209542	0.000182687	0.00018746	0.000176006	0.000145966	0.000134751	0.000168232	0.00017354	-1.30606	-2.63762	-0.407383	-2.61369	-3.01617	-2.6275	-0.666402	-2.67007	-1.48434	-2.6116	-3.09278	-3.62412	-1.64136	-2.74378	-3.13978	-3.63025	-1.99311	-2.746	0.107774	0.37094
CATGAAGTTCTTAGCAGTCC	MUCL1	Not Significant in Both and Not Common Essential	No	0.5848	1.06506	0.582836	1.13827	0.297065	0.929958	0.561911	1.21801	1.52758	0.190263	0.119443	0.673664	1.24089	0.5848	0.6104	1.79276	0.504585	0.505311	0.000209542	0.000182687	0.00018746	0.000176006	0.000145966	0.00269502	0.00336465	0.00017354	-0.0589107	-0.0158788	0.0294056	0.711152	-0.74802	-0.688386	-0.227802	0.620882	-3.46434	-3.99181	-3.43003	-3.45803	-3.62136	-2.82296	-2.17599	-3.46416	-0.0471946	-3.30359	0.0327423	0.764177
TTGCTGCGGAAAATAAGGTG	ZFYVE28	Significant in Both and Not Common Essential	No	0.413466	0.392569	0.589613	0.25295	0.935754	0.407953	0.170548	0.000197408	0.33431	0.00213778	0.141494	0.000184565	0.190741	0.413466	0.0830911	0.37038	0.0773697	0.141236	0.000209542	0.000182687	0.00018746	0.000176006	0.000145966	0.000134751	0.000168232	0.00017354	0.0166941	-0.53872	-3.10767	-0.447012	-2.26395	-0.619829	-3.13689	-0.690718	-2.59828	-3.30694	-2.61566	-2.90442	-2.7553	-3.43912	-2.66266	-2.91055	-1.34851	-2.89912	0.0403444	0.0332526
CCAGCACCGAGTAGCACACG	RBCK1	Not Significant in Both and Not Common Essential	No	0.185494	0.699796	0.0609945	0.530492	0.137392	1.77876	0.000179524	0.000197408	0.163495	2.33232	0.000183759	0.00184565	0.743676	0.185494	0.252469	0.143172	0.195106	0.0408015	0.000209542	0.00182687	0.00018746	0.000176006	0.00145966	0.00134751	0.000168232	0.00017354	0.405146	-2.53117	-3.42931	0.075543	0.522817	-2.52104	-2.45853	0.733422	-3.08094	-1.89415	-3.01736	-2.36515	-2.23796	-2.02633	-3.06436	-2.37128	-1.15039	-2.50719	0.00991949	0.408035
CGAGACAGCCTACGGCACCC	HOXA11	Not Significant in Both and Not Common Essential	No	0.783038	0.402809	0.376133	0.498873	0.857774	0.655796	0.000179524	0.0533002	0.32943	0.0513068	0.000183759	0.000184565	0.156451	0.783038	0.409064	0.301906	0.349846	1.76074	0.000209542	0.000182687	0.00018746	0.000176006	0.000145966	0.000134751	0.000168232	0.00017354	0.21167	-3.32122	-0.971261	-0.41561	-0.894924	-3.31109	-3.43184	-0.738995	-3.29052	-3.21816	-3.27097	-4.00017	-3.44754	-3.35034	-3.31797	-4.0063	-1.60916	-3.48775	0.0578426	0.00902077
ATGGGGTCAAAGTACAACTG	WDR87	Not Significant in Both and Not Common Essential	No	0.223725	0.0273091	0.105046	0.484821	0.163386	0.00021933	0.00179524	0.428376	5.30016	0.00213778	0.000183759	0.799168	8.68408	0.223725	0.00639162	0.373492	0.356573	0.0502173	0.000209542	0.00182687	0.00562379	0.00176006	0.00145966	0.00404253	0.000168232	0.0017354	-2.09521	-1.76726	-0.0537563	1.51107	-1.10634	-2.75713	0.217057	1.72551	-1.48434	-2.31057	-1.80212	-1.45533	-0.641359	-1.96563	-3.32624	-1.46145	-0.540757	-1.80588	0.0577975	0.186522
GCCCACCAGCAGTGTGACGT	KLHL30	Not Significant in Both and Not Common Essential	No	0.291692	0.085341	0.135543	0.221331	0.178239	0.00021933	0.000179524	0.000197408	1.58858	0.000213778	0.00183759	0.000184565	1.06729	0.291692	0.421847	0.121385	0.0033639	0.13182	0.000209542	0.000182687	0.00018746	0.000176006	0.000145966	0.000134751	0.000168232	0.0017354	-2.59006	-2.87795	-3.04968	0.950006	-2.60119	-1.86783	-3.07889	0.77728	-3.30388	-2.82246	-1.25393	-2.87445	-3.4609	-2.95463	-1.30093	-1.88058	-1.79229	-2.48147	0.0570807	0.526615
AGAACCTTCTGTAAGAAGTG	RPL36AL	DepMap Common Essential	Yes	0.824101	0.634937	1.03352	0.73777	0.564423	0.552711	0.0700145	0.157926	0.00732066	0.451073	0.000183759	0.000184565	0.00642947	0.824101	0.361127	0.413954	0.127828	0.204008	0.000209542	0.000182687	0.00018746	0.000176006	0.000145966	0.000134751	0.000168232	0.00017354	-0.0602325	-1.16913	-0.669467	-1.88705	-0.148484	-3.75007	-3.60177	-1.94343	-3.23639	-3.35524	-2.83372	-3.06412	-3.39341	-3.48742	-2.88072	-3.07025	-1.65371	-3.16516	0.0332548	0.000339956
GAGAAAAAGCATAAGGACTG	ARGFX	DepMap Common Essential	Yes	0.252045	0.706623	0.389687	0.15458	0.43817	0.00021933	0.00179524	0.000197408	0.941925	0.000213778	0.000183759	0.00553696	1.72739	0.252045	0.166182	0.239658	0.131192	0.241671	0.000209542	0.000182687	0.00018746	0.00176006	0.000145966	0.000134751	0.000168232	0.00017354	-3.50809	-2.33659	-2.89379	0.332374	-3.51922	-3.32647	-1.44588	0.595748	-2.89931	-3.11788	-2.845	-2.1377	-3.05633	-3.25006	-2.892	-3.14382	-2.01274	-2.91776	0.00104755	0.834473
TCATTAATAAGACAAACTAC	ERCC6L	Not Significant in Both and Not Common Essential	No	0.380899	0.122891	0.081326	0.295108	0.245078	0.00021933	0.00179524	0.000197408	0.866278	0.00213778	0.000183759	0.00184565	0.372909	0.380899	0.0990701	0.112048	0.1211	0.0627716	0.000209542	0.000182687	0.00018746	0.000176006	0.000145966	0.000134751	0.000168232	0.00017354	-2.74842	-1.65611	-3.17462	0.548353	-1.75956	-2.64598	-2.20383	0.182299	-2.67467	-2.7877	-2.81024	-2.55224	-2.83169	-2.91987	-2.85724	-2.55836	-1.68223	-2.749	0.0537979	0.58938
AATCACAGATCCAACTGGCT	PAGE2B	Not Significant in Both and Not Common Essential	No	0.47577	0.180923	0.576059	0.463741	0.54957	0.00021933	0.764773	0.00592224	0.649099	0.000213778	1.01986	0.000184565	0.173596	0.47577	0.0479372	0.25522	0.208562	0.0470787	0.000209542	0.000182687	0.00018746	0.000176006	0.000145966	0.000134751	0.00168232	0.00017354	-2.9164	0.123066	-1.89379	0.0722879	-2.92753	0.248074	-3.40013	-0.500483	-2.3594	-3.14521	-3.04633	-2.4273	-2.51642	-3.27738	-2.09333	-2.43342	-1.39936	-2.66235	0.0595381	0.472033
CTTACATAAATCACACGGCT	ABLIM2	Significant in Both and Not Common Essential	No	0.412051	1.28694	0.372744	0.463741	0.876341	0.653602	0.0448811	0.116471	0.0854077	0.000213778	0.000183759	0.00184565	0.342905	0.412051	0.178965	0.108935	0.222017	0.0847416	0.000209542	0.000182687	0.00018746	0.000176006	0.000145966	0.000134751	0.000168232	0.00017354	-0.294245	-0.919347	-0.600058	-1.01118	-3.7796	-3.30716	-2.40013	-0.407499	-2.9315	-2.77546	-3.07348	-2.68257	-3.08852	-2.90764	-3.12048	-2.6887	-1.5899	-2.90854	0.0257289	0.0364263
GCCTTGACTGCCTTGGCGGG	INSM1	Not Significant in Both and Not Common Essential	No	0.261957	0.587146	0.484567	0.0983694	0.568136	2.9763	5.357	0.00394816	0.256223	2.04372	4.05004	0.00553696	0.0985853	0.261957	1.18884	0.610038	0.316207	0.144375	0.00419084	0.00365373	0.00018746	0.00176006	0.00291933	0.000134751	0.00336465	0.00017354	0.704931	1.04357	-1.39647	-0.345834	0.541675	0.922105	-1.24959	-0.76064	-2.45282	-2.22262	-3.22706	-1.91396	-2.60984	-3.65582	-1.97303	-2.92009	-0.0675311	-2.62191	0.0553427	0.0927926
GGTCTTGATATCAACAAGAC	PKIA	Not Significant in Both and Not Common Essential	No	0.26762	0.215059	0.135543	0.333753	0.594129	0.614123	0.000179524	0.000197408	0.000244022	0.628509	0.000183759	0.000184565	0.000214316	0.26762	0.0990701	0.0560239	0.13792	0.0408015	0.000209542	0.000182687	0.00018746	0.000176006	0.000145966	0.000134751	0.000168232	0.00017354	0.455698	-2.87795	-3.22806	-3.38645	0.465754	-2.86783	-3.25728	-3.44283	-2.67467	-2.48667	-2.86672	-2.36515	-2.83169	-2.61884	-2.91372	-2.37128	-2.26737	-2.64109	0.0415213	0.256007
ATAGAATCGGCCATTCTGAG	CALR3	Not Significant in Both and Not Common Essential	No	0.3101	0.160441	0.433738	0.158094	0.215372	0.0021933	0.429063	0.000197408	1.30552	0.00213778	1.0952	0.00184565	2.29747	0.3101	0.0287623	0.0964856	0.444035	0.0690487	0.000209542	0.000182687	0.00018746	0.00176006	0.000145966	0.00134751	0.00168232	0.00017354	-1.86422	-0.00470641	-2.90355	0.782594	-1.87535	0.402266	-1.93277	1.02806	-2.13755	-2.72275	-3.37451	-1.59363	-2.29457	-1.85493	-2.42151	-2.59976	-0.795959	-2.3749	0.0777339	0.244462
AGTTCAGCCCAAGAAAAAGG	UBE2E2	Not Significant in Both and Not Common Essential	No	0.264788	0.0307228	0.101657	0.0772902	0.349051	0.00021933	0.000179524	0.769891	0.000244022	0.000213778	0.00183759	0.468796	0.00214316	0.264788	0.0543288	0.0622487	0.131192	0.351521	0.000209542	0.000182687	0.00018746	0.000176006	0.000145966	0.000134751	0.000168232	0.00017354	-2.14636	-2.75301	0.998305	-3.15546	-2.1575	-1.74289	0.782859	-2.21183	-2.41376	-2.53242	-2.845	-3.30042	-2.57078	-2.6646	-2.892	-3.30655	-1.54824	-2.81569	0.0418723	0.940632
AAACTGACCTACGACAGGCC	TDP1	Not Significant in Both and Not Common Essential	No	0.240717	0.0512046	0.162652	0.0386451	0.0408464	0.00021933	1.03226	0.000197408	0.000244022	0.00213778	1.72549	0.00184565	0.00214316	0.240717	0.0319581	0.538452	0.0504585	0.0188315	0.000209542	0.000182687	0.0018746	0.000176006	0.000145966	0.000134751	0.000168232	0.00017354	-2.36821	0.80253	-2.29173	-2.22372	-1.37935	1.02565	-1.32095	-1.2801	-2.18331	-3.46944	-1.43003	-2.02936	-2.34033	-3.60161	-2.47703	-2.03549	-1.12948	-2.44582	0.151199	0.347976
GTCCCCTCCAGACTCGCACA	TREX1	Not Significant in Both and Not Common Essential	No	0.230805	0.215059	0.0135543	0.217818	0.423317	1.40371	0.000179524	0.0750151	0.0146413	1.1544	0.000183759	0.00184565	0.000214316	0.230805	0.0639162	0.0778109	0.107645	0.0972959	0.000209542	0.000182687	0.00018746	0.000176006	0.000145966	0.000134751	0.000168232	0.0017354	0.81472	-1.87795	-0.462945	-1.46109	0.729799	-1.86783	-2.07194	-3.29561	-2.48434	-2.62933	-2.75909	-2.74257	-2.64136	-2.76151	-2.80609	-1.74869	-1.18661	-2.57162	0.0181092	0.623736
CTTACAATAACAAAGAATGT	ZNF534	Not Significant in Both and Not Common Essential	No	0.397891	0.836342	0.948803	0.228358	0.226512	0.530778	0.0484715	0.000197408	0.000244022	0.566513	0.0955545	0.000184565	0.000214316	0.397891	0.118245	0.261445	0.507949	0.169483	0.000209542	0.000182687	0.00018746	0.000176006	0.000145966	0.000134751	0.000168232	0.00017354	-0.197471	-1.29169	-3.06325	-2.96766	-0.169174	-0.996925	-3.09247	-3.02404	-2.75151	-3.15567	-3.43291	-2.9836	-2.90853	-3.28785	-3.47991	-2.98973	-1.85033	-3.12371	0.0156875	0.0748089
AAGTTCACCAAGGAGTCTCA	SIX3	Not Significant in Both and Not Common Essential	No	0.747638	0.774896	0.552339	0.0808034	0.122539	1.34668	0.368025	0.000197408	0.148853	0.944901	0.022051	0.00184565	0.109301	0.747638	0.188553	0.541564	0.356573	0.48648	0.00209542	0.000182687	0.00018746	0.000176006	0.000145966	0.000134751	0.000168232	0.00017354	0.240021	-0.176328	-2.61206	0.0844833	0.0861429	-1.39878	-1.64128	-0.0496502	-1.95416	-3.47194	-3.27924	-3.44154	-3.11118	-3.60412	-3.32624	-3.44767	-0.683432	-3.20451	0.00767043	0.713591
AATATTAAACCAAATCTGGG	C18orf63	Not Significant in Both and Not Common Essential	No	0.339835	0.26285	0.0982689	0.133501	0.308205	1.11639	0.000179524	0.00197408	0.000244022	0.121854	0.000183759	0.000184565	0.000214316	0.339835	0.111853	0.0466866	0.117736	0.0753259	0.000209542	0.000182687	0.00018746	0.000176006	0.000145966	0.000134751	0.000168232	0.00017354	0.628108	-2.73829	-1.83012	-3.10141	-0.333868	-2.72817	-2.85934	-3.15779	-2.72738	-2.40748	-2.798	-2.63142	-2.8844	-2.53966	-2.845	-2.63754	-2.01511	-2.68386	0.0566479	0.628401
AAGAAGAAATGTCAAAAACA	RRP8	Not Significant in Both and Not Common Essential	No	0.637192	0.856823	0.132155	0.0808034	0.330484	0.0855386	1.20281	0.00592224	0.510006	0.991932	0.847128	0.000184565	0.261465	0.637192	0.115049	0.376605	0.333026	0.150652	0.000209542	0.00182687	0.00018746	0.000176006	0.00145966	0.000134751	0.000168232	0.00017354	-1.00073	0.959113	-1.13494	0.188425	0.0635908	0.806865	-2.64128	-0.101737	-2.73961	-2.31418	-3.24957	-2.93245	-1.89663	-3.44635	-3.29657	-2.93858	-0.357587	-2.85174	0.0261614	0.726274
GGCAGATCCAGTCCCAACCA	IRF7	Not Significant in Both and Not Common Essential	No	0.683919	0.303814	0.247366	0.298621	0.805788	0.00438659	0.000179524	0.023689	0.575892	0.00213778	0.000183759	0.000184565	0.634375	0.683919	0.17577	0.659837	0.107645	0.191453	0.000209542	0.000182687	0.00018746	0.000176006	0.000145966	0.000134751	0.000168232	0.00017354	-1.84048	-3.13922	-1.10057	-0.14588	-2.15264	-3.12909	-3.20897	-0.103875	-2.92367	-3.55773	-2.75909	-3.03653	-3.08069	-3.6899	-2.80609	-3.04266	-1.85259	-3.11205	0.045441	0.0682766
GCTGAGAAACGACGCCCCAG	TMCO6	Not Significant in Both and Not Common Essential	No	0.14443	0.0580319	0.132155	0.653454	0.649829	0.00021933	0.00179524	0.215175	0.261104	0.00213778	0.000183759	0.461414	0.297899	0.14443	0.162986	0.24277	0.181651	0.0627716	0.000209542	0.000182687	0.00018746	0.000176006	0.000145966	0.000134751	0.000168232	0.00017354	-2.42257	-1.86696	-0.482423	-0.395986	-1.4337	-2.85683	-0.151124	-0.33873	-2.89088	-3.12349	-2.98633	-2.55224	-3.0479	-3.25566	-3.03333	-2.55836	-1.24354	-2.93102	0.00553535	0.287138
AATTACAATTCCATTCACCT	TTPAL	Not Significant in Both and Not Common Essential	No	0.587632	0.443773	0.176206	0.59373	0.115113	0.434273	0.000179524	0.102652	0.00244022	0.466037	0.000183759	0.232552	0.000214316	0.587632	0.0543288	0.849695	0.0302751	0.0659101	0.000209542	0.000182687	0.00018746	0.000176006	0.000145966	0.000134751	0.000168232	0.00017354	-0.00939805	-2.9919	-0.762222	-1.6737	0.0212595	-2.98177	-0.407069	-2.73007	-2.41376	-3.66756	-2.20818	-2.57342	-2.57078	-3.79973	-2.25518	-2.57955	-1.44186	-2.75852	0.133586	0.10201
ACCACTGGCTGGCTAGCAGA	SUSD5	Not Significant in Both and Not Common Essential	No	0.597544	0.607628	0.45407	0.576164	0.519863	1.1778	0.00179524	1.14694	0.197658	1.03041	0.000183759	0.56477	0.0171453	0.597544	1.62028	0.10271	0.228745	0.125543	0.000209542	0.00182687	0.00018746	0.00176006	0.000145966	0.000134751	0.000168232	0.00017354	0.287434	-2.403	0.298995	-0.419975	0.229372	-3.39287	-0.0086745	-1.48174	-3.88832	-1.74991	-3.08644	-1.85327	-4.04534	-2.88208	-3.13344	-2.85939	-0.861308	-2.93727	0.134544	0.863233
GACAACTTCACTCAGAACCC	MARCO	Not Significant in Both and Not Common Essential	No	0.44037	0.177509	0.189761	0.147554	0.248792	0.570257	0.0197477	0.0118445	0.153734	0.43397	0.000183759	0.000184565	0.0471495	0.44037	0.444218	0.136947	0.756877	0.185176	0.000209542	0.000182687	0.00018746	0.000176006	0.000145966	0.000134751	0.000168232	0.00017354	0.50685	-0.98269	-1.09543	-0.209066	0.388239	-3.01396	-2.9028	-0.722359	-3.32633	-2.87484	-3.60612	-3.02206	-3.48334	-3.00702	-3.65312	-3.02819	-1.0039	-3.25013	0.0240293	0.383102
CATGTTGGGTCCAATGCAGA	TAGAP	Not Significant in Both and Not Common Essential	No	0.512585	0.184337	0.162652	1.18395	0.47159	0.00021933	0.102329	0.811347	0.000244022	0.000213778	0.000183759	0.321144	0.000214316	0.512585	0.367518	0.501102	0.366665	0.222839	0.000209542	0.000182687	0.00018746	0.000176006	0.000145966	0.000134751	0.000168232	0.00017354	-2.92451	-0.201261	-0.164127	-3.28614	-2.93565	-2.94701	-0.566634	-3.34251	-3.24401	-3.43822	-3.29136	-3.10246	-3.40103	-3.57039	-3.33836	-3.10859	-2.04598	-3.3118	0.00175455	0.145963
AAAGTCACGGGCATAGATTG	CNTNAP4	Not Significant in Both and Not Common Essential	No	0.256293	0.180923	0.0440516	0.302135	0.0371331	0.00021933	0.00359049	0.0414557	1.02489	0.000213778	0.000183759	0.000184565	0.165023	0.256293	0.230098	0.220983	0.191742	0.13182	0.000209542	0.000182687	0.00018746	0.000176006	0.000145966	0.000134751	0.000168232	0.00017354	-2.9164	-1.08881	-0.862617	1.44092	-2.92753	-2.37971	-3.21405	0.647783	-3.04064	-3.08265	-3.00981	-2.87445	-3.19766	-3.21483	-3.05681	-2.88058	-1.41255	-3.04468	0.000634813	0.945437
GCAGGCGTAGGAGCCTCCAG	MT1HL1	Not Significant in Both and Not Common Essential	No	0.392227	0.276505	0.447293	0.973154	0.590416	0.00021933	0.789907	0.274397	0.719865	0.000213778	0.330766	0.095974	0.443634	0.392227	0.13742	0.48554	0.649233	0.150652	0.000209542	0.000182687	0.00018746	0.00176006	0.000145966	0.000134751	0.000168232	0.00017354	-3.1006	0.246984	-0.549802	0.0860929	-3.11174	-0.131071	-1.00603	-0.124133	-2.81678	-3.42452	-3.53949	-1.93245	-2.9738	-3.55669	-3.58649	-2.93858	-0.961288	-3.0961	0.0211257	0.236994
TGCTGGAGGACCTCAGACGA	AARD	Not Significant in Both and Not Common Essential	No	0.230805	0.0716864	0.189761	0.0526979	0.497583	0.00021933	0.000179524	0.00197408	0.66374	0.000213778	0.000183759	0.000184565	0.567937	0.230805	0.0862869	0.049799	0.1211	0.0721873	0.000209542	0.000182687	0.00018746	0.000176006	0.000145966	0.000134751	0.000168232	0.00017354	-2.51434	-3.02408	-1.42643	0.125132	-2.52547	-3.01396	-2.45564	0.0574346	-2.61467	-2.43551	-2.81024	-2.61293	-2.77169	-2.56769	-2.85724	-2.61906	-1.84717	-2.66113	0.0246696	0.682186
GCAGAAGTATGAGCTGCGAG	MFAP4	Not Significant in Both and Not Common Essential	No	0.192573	0.109236	0.101657	0.0597243	0.0779795	0.664569	0.000179524	0.305983	0.000244022	0.262947	0.000183759	0.000184565	0.000214316	0.192573	0.124637	0.121385	0.0706419	0.0439401	0.000209542	0.000182687	0.00018746	0.000176006	0.000145966	0.000134751	0.000168232	0.00017354	0.784174	-2.75301	0.709546	-2.50455	0.381502	-2.74289	-2.51	-2.56093	-2.77438	-2.82246	-2.57615	-2.39733	-2.9314	-2.95463	-2.62315	-2.40346	-1.39952	-2.68537	0.0124416	0.618546
TAAGCCACTAAAAGGTCCAA	KRR1	DepMap Common Essential	Yes	0.822685	0.26285	0.372744	0.491847	0.404751	0.00021933	0.00179524	0.58038	0.0195218	0.000213778	0.000183759	0.625677	0.00642947	0.822685	0.415455	0.97108	0.830883	0.379768	0.000209542	0.000182687	0.00018746	0.000176006	0.000145966	0.000134751	0.000168232	0.00017354	-3.07861	-2.31729	0.0718824	-1.31667	-3.08974	-3.30716	0.10452	-1.79901	-3.29725	-3.72555	-3.64663	-3.33399	-3.45427	-3.85772	-3.69363	-3.34012	-1.84151	-3.54365	0.00468361	0.0422335
GCAATGGCTTCTCTAAGGAG	FAM193B	Not Significant in Both and Not Common Essential	No	0.348331	0.324296	0.653996	0.186199	0.623836	0.936538	0.0484715	0.146082	0.192777	0.947039	0.00918794	0.000184565	0.128589	0.348331	0.143812	0.305019	2.13608	0.558667	0.000209542	0.000182687	0.00018746	0.000176006	0.00145966	0.000134751	0.000168232	0.00017354	0.460584	-1.13009	-0.105381	-0.510015	0.465426	-1.85236	-3.00383	-0.685867	-2.83652	-3.22262	-4.05671	-3.50163	-1.99354	-3.35479	-4.10371	-3.50775	-0.795191	-3.32216	0.128744	0.469613
TAACTTTCTGAGACTACTAG	AP4E1	Not Significant in Both and Not Common Essential	No	0.849589	0.454014	0.288029	0.565624	0.226512	0.00657989	0.0538573	0.838984	0.000244022	0.000213778	0.279313	1.44699	0.00428632	0.849589	0.102266	0.361043	1.61131	0.204008	0.000209542	0.000182687	0.00018746	0.000176006	0.000145966	0.000134751	0.000168232	0.0017354	-1.83885	-0.728192	0.171226	-2.96766	-3.32711	-0.0133451	0.407938	-1.72301	-2.68846	-3.29585	-3.93427	-3.06412	-2.84548	-3.42803	-3.98127	-2.07025	-1.25237	-3.16347	0.0875626	0.515186
ATTGCTCCAGCATTTACCAT	GLS	Not Significant in Both and Not Common Essential	No	0.368155	0.549596	0.349024	0.0210792	0.367618	0.160111	0.166958	0.0355335	0.588093	0.35701	0.21316	0.00369131	0.790825	0.368155	1.28152	0.364155	0.033639	0.000313858	0.000209542	0.000182687	0.00018746	0.000176006	0.000145966	0.00134751	0.000168232	0.00017354	-0.535622	-0.320248	0.226784	0.204049	-0.187363	-0.21415	-0.756674	0.332684	-3.78645	-3.29958	-2.25393	-0.251206	-3.94347	-2.43175	-2.30093	-0.257334	-0.156318	-2.31558	0.151991	0.753904
TGAGCCTGTTTATATAGATG	STAM2	Not Significant in Both and Not Common Essential	No	0.686751	1.30742	1.05724	0.632375	0.519863	0.929958	0.976612	0.00394816	0.517327	0.457486	1.03456	0.00369131	0.167166	0.686751	1.66821	1.71184	1.29847	1.38725	0.00209542	0.000182687	0.00018746	0.000176006	0.00145966	0.000134751	0.000168232	0.00017354	-0.147952	-0.0344515	-2.20458	-0.00212376	-0.456037	-0.0094179	-2.23379	-0.492741	-2.90098	-3.97176	-3.84052	-3.89663	-3.058	-4.10393	-3.88752	-3.90276	-0.697637	-3.69526	0.00183233	0.150428
GAAGGTCATGACGCACCAGT	XKR7	Not Significant in Both and Not Common Essential	No	0.557897	0.160441	0.464236	0.347806	0.178239	0.357507	0.00538573	2.22281	0.000244022	0.786705	0.00183759	2.13358	0.00214316	0.557897	0.23649	0.37038	0.477674	0.0564944	0.000209542	0.00182687	0.00018746	0.00176006	0.000145966	0.000134751	0.000168232	0.0017354	0.347969	-1.93549	0.805565	-2.86357	0.690497	-2.40249	0.787772	-1.91995	-3.05254	-2.30694	-3.40622	-1.50648	-3.20956	-3.43912	-3.45322	-1.51261	-0.811213	-2.73584	0.0189583	0.34894
ATTGCATCTATATTCCACTG	F13B	Not Significant in Both and Not Common Essential	No	0.403555	0.348191	0.0508287	0.221331	0.237652	0.0394793	0.00179524	0.000197408	2.74037	0.000213778	0.000183759	0.000184565	3.04543	0.403555	0.0862869	0.208533	0.107645	0.000313858	0.000209542	0.000182687	0.00374919	0.00176006	0.000145966	0.000134751	0.000168232	0.00017354	-0.945448	-1.45199	-3.04968	1.06187	-3.21185	-2.44186	-3.07889	1.10771	-2.61467	-3.05747	-1.45806	0.748794	-2.77169	-3.18964	-2.80609	-0.257334	-1.50127	-1.92577	0.0807885	0.350484
TGTGGCAGGTACCGACGCCG	MYL5	Not Significant in Both and Not Common Essential	No	0.216645	0.0443773	0.288029	0.186199	0.226512	0.00021933	0.0125667	0.0217149	0.905322	0.000213778	0.000183759	0.00369131	0.287183	0.216645	0.185357	0.180521	0.0807336	0.0941573	0.000209542	0.000182687	0.00018746	0.000176006	0.000145966	0.000134751	0.000168232	0.00017354	-2.30606	-1.36021	-0.93322	0.601712	-2.3172	-3.19519	-1.7028	0.103068	-2.94674	-2.99482	-2.63415	-2.72833	-3.10376	-3.127	-2.68115	-2.73445	-1.38874	-2.8688	0.00494712	0.755977
TTTGAAGAACTCTACTGATG	C8orf48	Not Significant in Both and Not Common Essential	No	0.264788	0.170682	0.569282	0.231871	0.215372	0.00021933	0.263901	0.073041	0.4368	0.000213778	0.450209	0.000184565	0.00642947	0.264788	0.517721	0.183634	0.141284	0.0282472	0.000209542	0.000182687	0.00018746	0.000176006	0.000145966	0.000134751	0.000168232	0.00017354	-2.89109	-0.333886	-0.50168	0.307093	-2.90222	-0.101913	-3.0991	-1.52501	-3.39282	-3.00225	-2.87718	-2.20545	-3.54984	-3.13442	-2.92418	-2.21158	-1.38098	-2.91222	0.0505475	0.203294
CAAGAGTCGCAGTGGTTTCG	STOX2	Not Significant in Both and Not Common Essential	No	0.365323	0.477909	0.237201	0.277542	0.0705529	0.728174	0.224405	0.495494	0.0610055	0.451073	0.461234	0.160572	0.000214316	0.365323	0.217315	0.420179	0.460854	0.288749	0.000209542	0.000182687	0.00018746	0.000176006	0.000145966	0.000134751	0.00168232	0.00017354	0.18289	-0.024084	0.25171	-0.0631459	-0.0250984	0.288805	-0.237659	-2.51746	-3.01582	-3.36173	-3.39065	-3.21499	-3.17284	-3.4939	-2.43765	-3.22112	-0.268005	-3.16359	0.00135653	0.745768
CTGCCTGAATATAGAAATAG	KDELC1	Not Significant in Both and Not Common Essential	No	0.400723	0.993369	0.196538	0.108909	0.627549	1.56601	1.0556	0.000197408	0.000244022	1.76795	1.07131	0.00184565	0.000214316	0.400723	0.178965	0.280119	0.134556	0.119266	0.000209542	0.00182687	0.00018746	0.00176006	0.000145966	0.000134751	0.00168232	0.00017354	0.197684	0.730053	-2.7417	-3.41022	0.250359	0.736469	-1.77091	-3.46659	-2.9315	-2.18563	-2.85599	-1.83099	-3.08852	-3.31781	-1.90299	-2.83712	-1.18436	-2.61882	0.0134931	0.503995
TCCGAGGCTTACCTGCGTAG	RHOQ	DepMap Common Essential	Yes	0.188325	0.276505	0.81326	0.8256	0.126252	0.00021933	0.00179524	1.54965	0.00488044	0.000213778	0.000183759	0.754873	0.000214316	0.188325	0.121441	0.63805	0.148012	0.244809	0.000209542	0.000182687	0.00018746	0.000176006	0.000145966	0.00134751	0.000168232	0.00017354	-3.1006	-2.65611	0.273464	-1.41278	-3.11174	-3.64598	-0.0388958	-2.77018	-2.76309	-3.54315	-2.89739	-3.1433	-2.92011	-2.67532	-2.94439	-3.14943	-2.05785	-3.00452	0.0475734	0.550421
GCGAGGTCGTCTTCAAAGGA	TMEM221	Not Significant in Both and Not Common Essential	No	0.33134	0.252609	0.0271087	0.927483	0.115113	0.364087	0.00179524	0.0098704	0.195218	0.630646	0.000183759	0.000184565	0.0257179	0.33134	0.134224	0.0529114	0.0874614	0.10985	0.000209542	0.000182687	0.00018746	0.000176006	0.000145966	0.000134751	0.000168232	0.00017354	0.158756	-1.17899	-1.97297	0.229395	0.397337	-2.16886	-3.70116	-0.650889	-2.80656	-2.46184	-2.66891	-2.79527	-2.96358	-2.59402	-2.71591	-2.8014	-1.11092	-2.72594	0.0431013	0.357665
CCAGTGGCAGAGCCTGATCG	PAK4	Not Significant in Both and Not Common Essential	No	0.230805	0.0751001	0.233812	0.58319	0.0742662	0.00021933	0.267491	0.159901	1.04441	0.000213778	0.0183759	0.000184565	1.1273	0.230805	0.166182	0.233433	0.13792	0.163206	0.000209542	0.000182687	0.00018746	0.000176006	0.000145966	0.000134751	0.000168232	0.0017354	-2.53454	0.0584424	-0.561959	1.14808	-2.54568	-1.10462	-3.49966	1.18125	-2.89931	-3.10645	-2.86672	-2.96721	-3.05633	-3.23863	-2.91372	-1.97334	-0.982336	-2.87771	0.000653814	0.658528
CTCAGCGTGCCCATCCCGGG	TRIM33	Not Significant in Both and Not Common Essential	No	0.196821	0.580319	0.0779374	0.344293	0.170812	0.081152	0.000179524	0.000197408	0.588093	0.000213778	0.000183759	0.00184565	0.555078	0.196821	0.0958743	0.0529114	0.211926	0.251086	0.000209542	0.000182687	0.00018746	0.000176006	0.000145966	0.000134751	0.000168232	0.00017354	-0.854368	-2.63762	-3.24156	0.536928	-3.4337	-2.6275	-2.27078	0.511836	-2.66043	-2.46184	-3.05328	-3.1543	-2.81745	-2.59402	-3.10028	-3.16042	-1.7521	-2.87525	0.0124054	0.363512
AGTCATTAAAAAGTATCACA	ABCB7	DepMap Common Essential	Yes	0.362491	0.0716864	0.108435	0.0878298	0.100259	0.0021933	0.000179524	0.000197408	0.636898	0.000213778	0.00183759	0.000184565	0.585082	0.362491	0.121441	0.124497	0.181651	0.0753259	0.000209542	0.000182687	0.00018746	0.000176006	0.000145966	0.000134751	0.000168232	0.00017354	-1.51434	-2.78105	-2.64828	0.802947	-2.52547	-1.77092	-2.67749	0.766093	-2.76309	-2.83345	-2.98633	-2.63142	-2.92011	-2.96563	-3.03333	-2.63754	-1.54356	-2.84636	0.0262961	0.950741
ACAAGAACCACACCCACCCT	KRTAP5-11	DepMap Common Essential	Yes	0.349747	0.747587	0.176206	0.270516	0.163386	1.10542	0.000179524	0.157926	0.0146413	1.37246	0.000183759	0.0313761	0.00642947	0.349747	0.776582	0.108935	0.134556	0.0690487	0.000209542	0.00182687	0.00018746	0.000176006	0.000145966	0.000134751	0.000168232	0.00017354	0.169866	-2.9919	-0.233739	-1.04764	0.263838	-2.98177	-0.935594	-1.40504	-3.56892	-1.77546	-2.85599	-2.59363	-3.72594	-2.90764	-2.90299	-2.59976	-1.14525	-2.86629	0.0942379	0.981392
CAAGCCCGAGTTCTACATGC	GGTLC1	Not Significant in Both and Not Common Essential	No	0.32426	0.211646	0.47779	0.25295	0.00371331	0.00021933	0.421882	0.120419	0.000244022	0.000213778	0.132306	0.550005	0.000214316	0.32426	0.556071	0.130722	0.19847	0.172622	0.000209542	0.000182687	0.00018746	0.000176006	0.000145966	0.000134751	0.000168232	0.00017354	-2.98451	-0.0540461	-0.32234	-1.18233	-2.99565	-0.557658	0.337332	-1.23871	-3.42386	-2.85464	-3.02479	-2.99157	-3.58088	-2.98682	-3.07179	-2.9977	-1.12474	-3.1165	0.0230053	0.374163
GACTCCCACACACGCCAGCA	GPR18	Not Significant in Both and Not Common Essential	No	0.42621	0.276505	0.213481	0.386451	0.237652	0.304868	0.00897621	0.0454039	0.417278	0.0897869	0.000183759	0.000184565	0.357907	0.42621	0.492155	0.224095	0.151375	0.10985	0.000209542	0.000182687	0.00018746	0.000176006	0.000145966	0.000134751	0.000168232	0.00017354	0.0424089	-1.37627	-0.930001	0.244484	-0.48849	-3.06511	-3.32095	0.177829	-3.37083	-3.08872	-2.90715	-2.79527	-3.52785	-3.2209	-2.95415	-2.8014	-1.08951	-3.08328	0.0208373	0.0637948
GCAGAGGACCGTCCAAGGAT	LOC400736	Significant in Both and Not Common Essential	No	0.845341	0.877305	0.826814	0.829113	0.920901	1.23483	0.163367	0.100678	0.268424	0.555824	0.0992297	0.0719805	0.188598	0.845341	1.18245	0.921281	0.460854	0.621438	0.000209542	0.00182687	0.00018746	0.000176006	0.000145966	0.000134751	0.000168232	0.00017354	0.148457	-0.704243	-0.915679	-0.535392	-0.198213	-0.920766	-1.0614	-0.688676	-3.75151	-2.70268	-3.39065	-3.54787	-3.90853	-3.83486	-3.43765	-3.554	-0.609489	-3.51597	0.00293021	0.00700931
GCAGCGAGCAGAGAATAGAG	ARL6IP6	Not Significant in Both and Not Common Essential	No	0.223725	0.0819273	0.284641	0.119449	0.129966	0.00021933	1.59777	0.00197408	0.000244022	0.000213778	4.23931	0.00369131	0.00642947	0.223725	0.000319581	0.0871482	0.0033639	0.000313858	0.00209542	0.00182687	0.0018746	0.000176006	0.000145966	0.000134751	0.000168232	0.00017354	-2.57233	0.749217	-1.78182	-2.7264	-2.58347	1.173	-1.51	-1.30565	0.81669	-1.67855	-0.253934	-0.251206	-0.340329	-2.81073	-1.30093	-0.257334	-1.31968	-0.759541	0.226213	0.331191
AAGTGAACCCGAGTCACCGA	PARG	Not Significant in Both and Not Common Essential	No	0.243549	0.2253	0.179595	0.0210792	0.0371331	0.383827	1.02149	0.000197408	0.000244022	0.374112	0.896743	0.00369131	0.000214316	0.243549	0.0766995	0.0653612	0.0269112	0.0627716	0.000209542	0.00182687	0.00018746	0.000176006	0.000145966	0.000134751	0.000168232	0.00017354	0.231374	0.75494	-2.02849	-2.18233	0.22024	0.698374	-0.756674	-2.23871	-2.56352	-1.55361	-2.15702	-2.55224	-2.72054	-2.68579	-2.20402	-2.55836	-0.662659	-2.37439	0.0676011	0.247782
GCGGACCAGCCGCCGCAGCA	RPS9	DepMap Common Essential	Yes	0.196821	0.416464	0.199926	0.129988	0.200519	0.0328994	0.0161572	0.000197408	0.180576	0.000213778	0.0422645	0.00184565	0.947276	0.196821	0.271644	0.0653612	0.309479	0.0408015	0.000209542	0.000182687	0.00018746	0.000176006	0.000145966	0.000134751	0.000168232	0.00017354	-1.10239	-1.0925	-2.81854	-0.0454955	-3.28961	-0.674894	-1.84775	0.674321	-3.11273	-2.55361	-3.21772	-2.36515	-3.26975	-2.68579	-3.26472	-2.37128	-1.27461	-2.85509	0.0304228	0.558645
GCCAGCGGGAGCACATCGGT	ACLY	DepMap Common Essential	Yes	0.196821	0.341364	0.210092	0.238897	0.0445597	0.712821	0.000179524	0.000197408	0.000244022	0.506655	0.000183759	0.000184565	0.000214316	0.196821	0.0319581	0.0373492	0.195106	0.147513	0.000209542	0.000182687	0.00018746	0.000176006	0.000145966	0.000134751	0.000168232	0.00017354	0.319763	-3.06829	-3.08285	-2.26151	0.171495	-3.05816	-3.11206	-2.31789	-2.18331	-2.31057	-3.01736	-2.9233	-2.34033	-2.44275	-3.06436	-2.92943	-2.05119	-2.65143	0.0294577	0.642814
ACTGCAAGTTCCTACCATCA	ADAM29	Not Significant in Both and Not Common Essential	No	0.658431	0.430119	0.772597	0.245923	1.79353	2.14724	0.000179524	0.00197408	0.353832	1.1373	0.00183759	0.00184565	0.0192884	0.658431	0.19814	0.417067	0.191742	0.775229	0.000209542	0.000182687	0.00018746	0.000176006	0.00291933	0.000134751	0.000168232	0.00017354	0.698292	-3.63383	-2.09543	-0.704912	0.422286	-2.6237	-2.12465	-1.96841	-2.9757	-3.3585	-3.00981	-3.6439	-1.83169	-3.49067	-3.05681	-3.65003	-1.5038	-3.12714	0.0194332	0.424531
AGATATTTGACCAAAAACAC	HPGDS	Not Significant in Both and Not Common Essential	No	0.497009	0.18775	0.196538	0.326727	0.0556996	0.00438659	4.10751	0.00394816	0.0268424	0.000213778	1.56195	0.000184565	0.00857263	0.497009	0.230098	0.155622	0.356573	0.169483	0.000209542	0.000182687	0.00018746	0.00528017	0.000145966	0.000134751	0.000168232	0.00017354	-1.63145	1.32013	-1.91779	-0.317031	-2.94362	0.900221	-3.24804	-0.812738	-3.04064	-2.93036	-3.27924	-1.50648	-3.19766	-3.06254	-3.32624	-2.98973	-1.08129	-2.91661	0.0120767	0.409039
CAGTGTGAGCACATTTCCAA	PPP3R1	Not Significant in Both and Not Common Essential	No	0.545153	0.279918	0.128766	0.200252	0.842921	1.63839	0.000179524	0.000197408	0.000244022	0.966279	0.000183759	0.000184565	0.00214316	0.545153	0.329169	0.887045	1.28837	0.134959	0.000209542	0.000182687	0.00018746	0.00176006	0.000145966	0.000134751	0.000168232	0.00017354	0.767386	-2.85568	-3.00621	-3.53836	0.538072	-2.84555	-3.03543	-2.59473	-3.19615	-3.68624	-3.83713	-1.88467	-3.35317	-3.81841	-3.88413	-2.8908	-2.07131	-3.31884	0.0361382	0.781676
TAAGCACTTGCCCTCCACCT	TRIM39	Not Significant in Both and Not Common Essential	No	0.332756	0.416464	0.31175	0.189712	1.5076	0.00021933	0.326734	0.898207	0.736947	0.00213778	0.360167	0.573998	0.865836	0.332756	0.156595	0.417067	0.114373	1.11106	0.000209542	0.000182687	0.0018746	0.000176006	0.000145966	0.00134751	0.000168232	0.00017354	-3.27848	0.0203879	0.675282	-0.31085	-2.28961	0.0626975	0.480816	-0.24085	-2.87351	-3.3585	-1.78541	-3.80021	-3.03053	-2.49067	-2.83241	-3.80634	-0.610076	-2.9972	0.0771421	0.775828
TGCCAGTAACATGCTAAAGA	CRISP2	Not Significant in Both and Not Common Essential	No	0.29594	0.273091	0.0338858	0.147554	1.02487	0.668955	0.000179524	0.000197408	0.407517	1.27412	0.000183759	0.000184565	0.192884	0.29594	0.127832	0.0186746	0.0168195	0.313858	0.000209542	0.000182687	0.00018746	0.000176006	0.000145966	0.000134751	0.00168232	0.00017354	0.38909	-2.2759	-2.87359	-0.400523	0.668903	-2.26577	-2.9028	-0.725373	-2.78537	-2.00954	-1.9529	-3.25121	-2.94239	-2.14172	-0.999904	-3.25733	-1.29824	-2.41755	0.0753945	0.879257
CAAGTGGTGCTTACATCTTG	LYZL4	Not Significant in Both and Not Common Essential	No	0.834013	0.979714	0.938637	0.491847	0.326771	0.265389	1.1687	1.37396	1.90581	0.00427557	1.38554	0.494635	1.50235	0.834013	0.588029	0.454416	0.322934	0.643409	0.000209542	0.00182687	0.00018746	0.000176006	0.00145966	0.000134751	0.00504697	0.00017354	-0.567216	0.0952054	0.446144	0.765836	-2.36011	0.169121	0.00245482	0.662528	-3.44813	-2.39575	-3.23621	-3.56296	-2.60515	-3.52792	-1.80608	-3.56909	-0.098254	-3.01891	0.00279859	0.296186
TCCGCTCCACACCTACCAGT	ANKRD16	Not Significant in Both and Not Common Essential	No	0.321428	0.440359	0.291418	0.224844	0.412177	0.00438659	1.19384	0.0434298	0.00244022	0.00213778	1.04926	0.0701349	0.000214316	0.321428	0.265252	0.529114	0.625685	0.081603	0.000209542	0.000182687	0.00018746	0.000176006	0.00145966	0.000134751	0.000168232	0.00017354	-2.00168	0.61243	-0.714093	-2.22765	-2.31384	0.556367	-0.505947	-3.28403	-3.10239	-3.46184	-3.52345	-2.66618	-2.25941	-3.59402	-3.57045	-2.67231	-1.23481	-3.10625	0.0196591	0.825262
GGTTAAATGTCACCCCGCGC	C19orf38	Not Significant in Both and Not Common Essential	No	0.269036	0.392569	0.81326	0.231871	0.167099	0.664569	0.0412906	0.023689	0.000244022	0.230881	0.248074	0.00184565	0.000214316	0.269036	0.619987	0.10271	0.161467	0.273056	0.000209542	0.000182687	0.00018746	0.000176006	0.000145966	0.000134751	0.000168232	0.00017354	0.228624	-1.29438	-0.9907	-2.83554	-0.230528	-0.515648	-2.0991	-2.89192	-3.47111	-2.74991	-2.93518	-3.19072	-3.62813	-2.88208	-2.98218	-3.19685	-1.32865	-3.12952	0.0336527	0.153995
GCTGTCTTCCAGAAGTATGC	S100A11	Not Significant in Both and Not Common Essential	No	0.511169	0.238955	0.220258	0.386451	0.48273	0.0109665	0.000179524	0.09673	1.04929	0.00213778	0.000183759	0.0184565	1.36305	0.511169	0.268448	0.233433	0.111009	0.448817	0.000209542	0.000182687	0.00018746	0.000176006	0.000145966	0.000134751	0.00168232	0.00017354	-1.33825	-3.08881	-0.601533	0.337191	-2.04835	-3.07868	-1.32095	0.450807	-3.10759	-3.10645	-2.77245	-3.40654	-3.26461	-3.23863	-1.81945	-3.41267	-1.33607	-3.01605	0.012651	0.812646
TCTCTCCGCAGGGGTATGAA	RBPMS2	Not Significant in Both and Not Common Essential	No	0.00849589	0.269677	0.14232	0.122962	0.141106	0.00438659	0.201067	0.000197408	0.644218	0.000213778	0.163545	0.000184565	0.195027	0.00849589	0.0958743	0.756322	0.00033639	0.0753259	0.000209542	0.000182687	0.00018746	0.000176006	0.000145966	0.000134751	0.000168232	0.00017354	-1.78872	0.150075	-2.79441	0.659487	-3.10088	0.0603713	-2.82362	0.140549	-2.66043	-3.617	-0.253934	-2.63142	-2.81745	-3.74917	-0.300934	-2.63754	-1.18714	-2.33349	0.262151	0.875064
GCAGCTCATTGATCTCGCTG	MTMR6	Not Significant in Both and Not Common Essential	No	0.290276	0.648591	0.850534	0.295108	0.267358	0.475945	4.21164	0.221097	0.000244022	0.391215	5.92622	0.00553696	0.00642947	0.290276	0.17577	0.0186746	0.0504585	0.0847416	0.000209542	0.00730747	0.00018746	0.00176006	0.000145966	0.00134751	0.00168232	0.00017354	-0.134414	0.69476	-0.125398	-3.03966	-0.219555	0.843086	-1.72671	-1.61892	-2.92367	-0.407484	-2.43003	-1.68257	-3.08069	-1.14172	-1.47703	-2.6887	-0.665852	-1.97899	0.0675806	0.294233
GGTGAAGAGATAAAGAAGTG	GRAMD2	Not Significant in Both and Not Common Essential	No	0.222309	0.378914	0.352413	0.207278	0.52729	0.00657989	0.689373	0.000197408	0.0390435	0.000213778	0.47226	0.000184565	0.000214316	0.222309	0.0926785	0.0715861	0.00033639	0.608884	0.000209542	0.000182687	0.00018746	0.000176006	0.000145966	0.000134751	0.000168232	0.00017354	-1.76032	0.291402	-3.02119	-1.1305	-3.24858	0.127129	-3.0504	-3.39099	-2.64571	-2.59312	-0.253934	-3.53901	-2.80273	-2.7253	-0.300934	-3.54513	-1.89793	-2.30073	0.140646	0.126297
TTCCTGCTAGAGTTCCCGGT	AIDA	Not Significant in Both and Not Common Essential	No	0.618784	0.348191	0.345635	1.21556	0.49387	2.485	0.40752	1.1351	0.0341631	2.2917	0.161708	1.20706	0.0171453	0.618784	0.153399	0.482428	0.33639	0.568083	0.00209542	0.000182687	0.00018746	0.00176006	0.00291933	0.00134751	0.000168232	0.00017354	0.853509	0.0715312	-0.0297423	-1.16006	0.81834	-0.329886	-0.00304754	-1.45947	-1.86455	-3.42172	-3.25393	-2.50888	-1.72054	-2.5539	-3.30093	-3.51501	-0.154852	-2.76744	0.00698746	0.369868
GAACTGGAAGACGTGTACTC	ENTPD6	Not Significant in Both and Not Common Essential	No	0.436122	0.184337	0.179595	0.428609	0.200519	1.27211	12.3459	3.35396	0.0122011	0.795256	22.7898	3.0158	0.00642947	0.436122	0.5337	0.410842	0.410396	0.13182	0.00419084	0.00365373	0.00937298	0.00528017	0.0102176	0.00673755	0.00336465	0.00694159	0.838912	1.83723	0.893497	-1.21576	0.634894	2.10345	0.847341	-1.49398	-2.105	-2.05094	-1.64133	-1.39733	-1.71795	-1.78517	-2.08626	-1.27852	0.555698	-1.75781	0.00487412	0.113636
CATGGCGGGCAGGTAAACCA	CHADL	Not Significant in Both and Not Common Essential	No	0.226557	0.116064	1.03352	0.147554	0.193092	0.00438659	5.88301	0.0671187	0.00244022	0.00641335	8.34081	0.0166109	0.00214316	0.226557	0.0543288	0.550901	0.242201	0.147513	0.000209542	0.00182687	0.0018746	0.00352011	0.00145966	0.00404253	0.00168232	0.0017354	-1.42257	0.755281	-0.342107	-1.89834	-1.25761	0.906889	-0.948558	-1.95471	-2.41376	-2.47937	-2.11127	-1.62227	-1.57078	-2.13442	-2.15827	-1.92943	-0.770215	-2.05245	0.0442146	0.264393
GACTCGCCTCAGGTTATCCA	NEUROD4	Not Significant in Both and Not Common Essential	No	0.329924	0.136546	0.081326	0.0597243	0.185665	0.0285129	0.000179524	0.0118445	0.617376	0.00213778	0.000183759	0.000184565	0.546505	0.329924	0.0639162	0.314356	0.393576	0.00941573	0.000209542	0.000182687	0.00018746	0.000176006	0.000145966	0.000134751	0.000168232	0.00017354	-0.680238	-2.65611	-0.702634	0.52182	-1.80532	-2.64598	-2.51	0.468864	-2.48434	-3.23571	-3.32212	-1.72833	-2.64136	-3.36789	-3.36912	-1.73445	-1.2512	-2.73542	0.0455021	0.942971
AACACTGCTCCCAAATAACG	ADAM32	Not Significant in Both and Not Common Essential	No	0.491345	0.382328	0.166041	0.33024	0.664682	1.2765	0.00179524	0.0118445	0.8858	6.27867	0.00367518	0.00184565	1.05229	0.491345	0.0607204	0.14006	0.0874614	0.119266	0.000209542	0.000182687	0.00018746	0.000176006	0.00145966	0.000134751	0.00504697	0.00347079	0.523585	-1.96609	-1.44531	0.124722	1.21543	-1.65494	-2.25268	0.199522	-2.46206	-2.88461	-2.66891	-2.83099	-1.61908	-3.01678	-1.23879	-1.53609	-0.65697	-2.28216	0.0869994	0.334594
GCACCATAGTTCAGCTCCGG	ZNF449	Not Significant in Both and Not Common Essential	No	0.167086	1.02068	0.281252	0.0808034	0.122539	0.19959	0.000179524	0.0690928	3.42119	0.00213778	0.000183759	0.0110739	5.85939	0.167086	0.0415455	0.0653612	0.124464	0.0282472	0.000209542	0.000182687	0.0018746	0.000176006	0.00145966	0.000134751	0.00168232	0.00520619	-0.708751	-3.19497	-0.0679968	1.4459	-2.67893	-3.18485	-0.863129	1.67958	-2.29725	-2.55361	-1.82214	-2.20545	-1.45427	-2.68579	-1.86914	-0.734455	-0.946643	-1.95276	0.0329386	0.317804
CTATATGCCATGGAGTTACA	GMPPB	DepMap Common Essential	Yes	0.5848	0.989955	0.203315	0.379425	0.456737	3.10132	0.201067	0.604069	0.131772	2.16771	0.170896	1.01696	0.0214316	0.5848	0.88524	0.687849	1.96788	0.332689	0.000209542	0.00182687	0.00018746	0.00176006	0.00145966	0.00269502	0.000168232	0.00017354	0.495931	-0.00482862	0.201961	-0.539843	0.340386	-0.0754375	0.428178	-1.32861	-3.62579	-2.57579	-4.02109	-2.27651	-2.78281	-2.40693	-4.06809	-3.28264	-0.0602832	-3.12996	0.0347626	0.363462
GCTGTTACACTAAAGTTACA	DBR1	DepMap Common Essential	Yes	0.215229	0.252609	0.52523	0.0421583	0.048273	0.00021933	0.00179524	1.69376	0.000244022	0.000213778	0.000183759	0.872994	0.000214316	0.215229	0.530505	0.0529114	0.854431	0.477064	0.000209542	0.000182687	0.00018746	0.000176006	0.000145966	0.000134751	0.000168232	0.0017354	-3.06135	-2.46623	1.60397	-2.29628	-3.07249	-3.4561	1.31613	-2.35265	-3.40342	-2.46184	-3.65877	-3.43305	-3.56044	-2.59402	-3.70577	-2.43918	-1.72312	-3.15706	0.0367445	0.674248
TTGTGACTTTAAAAGAGGCA	TMPRSS11F	Not Significant in Both and Not Common Essential	No	0.31718	0.467669	0.0609945	0.133501	0.0371331	1.52434	3.02678	0.00394816	0.000244022	1.92401	2.87399	0.000184565	0.000214316	0.31718	0.108658	0.326806	0.0370029	0.000313858	0.00628626	0.000182687	0.0018746	0.000176006	0.000145966	0.000134751	0.000168232	0.0017354	0.513143	1.69569	-1.52909	-2.18233	0.614269	1.67319	-2.85934	-2.23871	-1.23767	-3.25258	-1.29533	-0.251206	-2.87181	-3.38476	-2.34233	0.742666	-0.539146	-1.73663	0.086316	0.0816556
TACCTGCCACTAATTCATCG	DNAI1	Not Significant in Both and Not Common Essential	No	0.514001	0.460841	0.31175	0.200252	1.28109	0.423306	0.166958	0.000197408	0.0561251	0.459624	0.000183759	0.000184565	0.0964421	0.514001	0.361127	0.205421	0.181651	0.235393	0.000209542	0.000182687	0.00018746	0.000176006	0.000145966	0.000134751	0.000168232	0.00017354	-0.0368967	-0.271199	-3.00621	-1.35842	-0.00114841	-3.22956	-3.03543	-1.12331	-3.23639	-3.05094	-2.98633	-3.12627	-3.39341	-3.18311	-3.03333	-3.13239	-1.50777	-3.14277	0.00842959	0.101739
TTATAAATTAAAGCTTGCTA	ARL14	Not Significant in Both and Not Common Essential	No	0.645687	0.26285	0.504899	0.228358	1.02859	0.0241263	0.432653	0.00789632	2.11567	0.00427557	0.41897	0.000184565	1.2066	0.645687	1.02266	0.454416	0.0908253	0.182038	0.00209542	0.000182687	0.00018746	0.000176006	0.000145966	0.000134751	0.000168232	0.0017354	-1.03722	-0.0670648	-1.46119	0.313206	-1.78871	-0.0810216	-3.09247	0.069321	-2.68846	-3.39575	-2.6853	-3.01463	-3.84548	-3.52792	-2.7323	-2.02076	-0.893144	-2.98883	0.0462767	0.980257
GTGTTGCGTGACAACATCCA	HIST1H4A	Significant in Both and Not Common Essential	No	0.62728	0.570078	0.372744	0.488334	0.568136	0.0482525	0.0197477	0.93374	0.000244022	0.000213778	0.000183759	0.199331	0.000214316	0.62728	0.457001	0.25522	0.531496	0.150652	0.000209542	0.000182687	0.00018746	0.000176006	0.000145966	0.000134751	0.000168232	0.00017354	-1.07241	-1.27589	0.281509	-3.36702	-3.42597	-3.30716	-0.389142	-3.4234	-3.33865	-3.14521	-3.45259	-2.93245	-3.49567	-3.27738	-3.49959	-2.93858	-1.99744	-3.26001	0.0101267	0.0138183
ATAGACCGTGTAGTCACAAG	POLR2B	DepMap Common Essential	Yes	0.594712	0.570078	0.386298	0.274029	0.382471	0.916798	0.000179524	0.00394816	0.000244022	1.71237	0.000183759	0.00184565	0.000214316	0.594712	0.182161	0.469978	0.248929	0.141236	0.000209542	0.00182687	0.00018746	0.000176006	0.000145966	0.000134751	0.000168232	0.00017354	0.206339	-3.3328	-1.8414	-3.19517	0.477663	-3.32267	-2.17165	-3.25154	-2.93918	-2.41037	-3.12317	-2.90442	-3.0962	-3.54255	-3.17017	-2.91055	-2.0539	-3.01208	0.0202875	0.647388
GTGGTGGACAGAGCCATGAG	SH3BP1	Not Significant in Both and Not Common Essential	No	0.353995	0.631523	0.0745488	0.0456715	0.909761	0.835646	0.000179524	0.000197408	0.0585653	0.305703	0.000183759	0.000184565	0.000214316	0.353995	0.0766995	0.177409	0.174923	0.194592	0.000209542	0.000182687	0.00018746	0.000176006	0.000145966	0.000134751	0.000168232	0.00017354	0.121633	-2.61832	-2.36428	-1.19129	-0.315089	-2.60819	-2.3935	-3.62787	-2.56352	-2.98727	-2.96994	-3.0436	-2.72054	-3.11944	-3.01694	-3.04973	-1.87461	-2.93387	0.0119777	0.236243
CAGGAAGCATGGGTTAGATG	NLRP1	Not Significant in Both and Not Common Essential	No	0.407803	0.832928	0.0881031	0.0667507	0.300778	0.00438659	0.000179524	0.000197408	0.480723	0.000213778	0.000183759	0.000184565	0.713672	0.407803	0.150203	0.196084	0.141284	0.291888	0.000209542	0.000182687	0.00018746	0.000176006	0.000145966	0.000134751	0.000168232	0.00017354	-2.27848	-2.69087	-2.52909	0.203649	-3.59064	-2.68074	-2.55831	0.375253	-2.85541	-3.03073	-2.87718	-3.21969	-3.01243	-3.16291	-2.92418	-3.22582	-1.96865	-3.03854	0.00917501	0.301502
AGTCTCAGTCCATTTCGTGA	CCSER1	Not Significant in Both and Not Common Essential	No	0.553649	0.266264	0.0576059	0.0983694	0.0854061	0.774234	0.000179524	0.00592224	0.000244022	1.55631	0.000183759	0.00184565	0.00428632	0.553649	0.396281	0.373492	0.450763	0.216562	0.000209542	0.000182687	0.00018746	0.000176006	0.00145966	0.000134751	0.000168232	0.00017354	0.46356	-2.50634	-1.22037	-2.54406	0.766784	-2.49622	-1.72671	-1.2994	-3.27673	-3.31057	-3.38104	-3.09005	-2.43375	-3.44275	-3.42804	-3.09618	-1.32035	-3.18239	0.00194048	0.72711
TAGGAAATCGACCGACCAGG	ANKLE1	Not Significant in Both and Not Common Essential	No	0.390811	0.245782	1.17584	0.186199	0.193092	0.00657989	0.798883	0.570509	0.466082	0.000213778	0.940845	0.699503	0.717958	0.390811	0.357931	0.252107	0.0538224	0.492757	0.00209542	0.000182687	0.00018746	0.000176006	0.000145966	0.000134751	0.000168232	0.0017354	-1.57233	-0.167865	0.486285	0.382698	-3.06059	-0.0968301	0.574812	0.570335	-2.23253	-3.13988	-2.45805	-3.44711	-3.38955	-3.27205	-2.50505	-2.45323	-0.360435	-2.86218	0.0143487	0.711148
GGACAATGAACATTGTCCCT	GPR19	Not Significant in Both and Not Common Essential	No	0.424794	0.259437	0.518453	0.200252	0.467877	0.00021933	1.50262	0.128315	0.602735	0.00213778	2.70677	0.291613	1.6438	0.424794	0.140616	0.146285	0.0706419	0.0439401	0.000209542	0.00182687	0.00018746	0.00176006	0.000145966	0.000134751	0.000168232	0.00347079	-3.07293	0.46214	-0.193299	0.109995	-2.08407	0.717742	0.16323	0.545717	-2.82676	-1.90349	-2.57615	-1.39733	-2.98378	-3.03567	-2.62315	-1.10243	-0.418935	-2.3061	0.0726014	0.211046
GCATGTGTCACAGCTGACTT	PVR	Not Significant in Both and Not Common Essential	No	0.375235	0.0819273	0.545562	0.270516	0.219085	0.546131	0.00359049	0.892284	0.00244022	0.622095	0.000183759	0.273157	0.00214316	0.375235	0.380302	0.298794	0.104281	0.238532	0.000209542	0.000182687	0.00018746	0.000176006	0.00145966	0.000134751	0.000168232	0.00017354	0.823868	-2.18169	0.51831	-1.95318	0.880428	-3.4726	0.00421938	-2.00956	-3.25886	-3.21366	-2.7453	-3.13202	-2.41588	-3.34584	-2.7923	-3.13815	-0.923775	-3.00525	0.0054365	0.969708
ATTCGGATGATAAACAACAG	TRNT1	DepMap Common Essential	Yes	0.397891	0.143373	0.440516	0.119449	0.746375	0.00021933	0.00179524	0.0197408	1.05418	0.000213778	0.000183759	0.000184565	0.12216	0.397891	0.0735037	0.112048	0.726602	0.150652	0.000209542	0.000182687	0.00018746	0.000176006	0.000145966	0.000134751	0.000168232	0.00017354	-2.81537	-2.38984	-0.781818	0.149958	-2.8265	-3.37971	-2.81103	-0.786028	-2.54504	-2.7877	-3.58839	-2.93245	-2.70206	-2.91987	-3.63539	-2.93858	-1.95504	-3.00618	0.0757311	0.231347
TTATAACAGATTCGTACAGT	DMXL1	Not Significant in Both and Not Common Essential	No	0.325676	0.153614	1.08773	0.681559	0.267358	0.271969	0.00179524	0.487598	0.00976088	0.235156	0.000183759	0.191948	0.000214316	0.325676	0.0639162	0.220983	0.0067278	0.718734	0.000209542	0.000182687	0.00018746	0.000176006	0.000145966	0.000134751	0.000168232	0.00017354	0.248089	-2.7824	-0.145442	-1.4376	0.184925	-3.77227	-0.55032	-3.09604	-2.48434	-3.08265	-1.55496	-3.61104	-2.64136	-3.21483	-1.60196	-3.61717	-1.41888	-2.72604	0.101834	0.108603
AAAGCATGTTTATCTGAACT	LTN1	Not Significant in Both and Not Common Essential	No	0.402139	0.170682	0.555727	0.319701	0.415891	0.153531	1.73779	1.14497	0.043924	0.029929	1.32123	0.568461	0.12216	0.402139	0.23649	0.143172	0.218653	0.241671	0.000209542	0.000182687	0.0018746	0.000176006	0.00145966	0.000134751	0.00168232	0.00017354	-0.0459916	0.495136	0.55405	-0.976278	-0.756096	0.376117	0.249957	-0.53205	-3.05254	-2.89415	-2.06685	-3.1377	-2.20956	-3.02633	-2.11385	-3.14382	-0.0793945	-2.7056	0.00424267	0.308592
GAAGGCAAAGAAACCTGCTA	HIST1H1A	Not Significant in Both and Not Common Essential	No	0.514001	0.706623	0.769208	0.5059	0.690675	0.484719	4.20087	0.00592224	0.819914	0.0363423	12.4056	0.0258392	0.0707242	0.514001	0.185357	0.35793	0.228745	0.335828	0.00209542	0.000182687	0.0018746	0.00176006	0.00291933	0.00673755	0.00504697	0.00017354	-0.163698	0.737295	-1.93158	0.0744946	-1.28878	1.20757	-1.29179	-0.989706	-1.94674	-3.29209	-2.08644	-2.28059	-1.80273	-1.7253	-1.65632	-3.28672	-0.455772	-2.25962	0.00494084	0.32643
GGTCCTGAGGGATATAGTGT	DDX43	Not Significant in Both and Not Common Essential	No	0.199653	0.583732	0.176206	0.277542	0.159672	0.677729	0.000179524	0.000197408	0.00244022	0.515206	0.000183759	0.000184565	0.000214316	0.199653	0.210924	0.233433	0.491129	0.367214	0.000209542	0.000182687	0.00018746	0.000176006	0.000145966	0.000134751	0.000168232	0.00017354	0.0648426	-2.9919	-3.14796	-1.8158	-0.0542326	-2.98177	-3.17718	-2.87217	-3.00285	-3.10645	-3.41829	-3.31939	-3.15987	-3.23863	-3.46529	-3.32552	-2.12202	-3.25454	0.00596452	0.326058
CCCGATATCTGAGTCCTCCT	CT47A9	Not Significant in Both and Not Common Essential	No	0.291692	0.348191	0.684494	0.0983694	0.170812	0.0394793	1.23692	0.0848855	0.21718	0.00641335	2.00665	0.0719805	0.0278611	0.291692	0.278036	0.0591363	0.114373	1.35273	0.000209542	0.000182687	0.00018746	0.000176006	0.00145966	0.000134751	0.000168232	0.0017354	-0.945448	0.256972	-0.0640265	0.104301	-1.73473	0.467102	-0.135645	-0.78752	-3.12283	-2.51015	-2.78541	-3.88568	-2.27985	-2.64232	-2.83241	-2.89181	-0.354875	-2.86881	0.153012	0.626598
CTCTAGTGGAAGTTACCCTG	MAGEA2	Not Significant in Both and Not Common Essential	No	0.397891	1.07188	0.613333	0.351319	0.378757	1.5375	4.38398	0.0177667	0.175696	1.7936	6.55284	0.0110739	0.137162	0.397891	0.341952	0.214758	0.141284	0.649686	0.000209542	0.00182687	0.00374919	0.000176006	0.00437899	0.00134751	0.00168232	0.00347079	0.156669	0.854172	-1.29609	-0.333599	0.223579	1.02873	-1.5014	-0.441127	-3.21269	-2.07024	-1.57616	-3.56718	-1.89259	-2.20242	-1.92418	-2.27228	-0.163633	-2.33972	0.016756	0.186587
AAAAAGAGAGTTGCATTCGA	FKBP5	Not Significant in Both and Not Common Essential	No	0.329924	0.0307228	0.0677716	0.33024	0.107686	0.0021933	1.8114	0.0552743	0.00244022	0.000213778	0.744223	0.00553696	0.000214316	0.329924	0.0383497	0.457528	0.0840975	0.0408015	0.000209542	0.00182687	0.00018746	0.000176006	0.000145966	0.000134751	0.000168232	0.00017354	-1.14636	1.42697	-0.776306	-1.64473	-2.1575	1.04066	-1.77556	-2.7011	-2.26249	-2.39871	-2.65187	-2.36515	-2.41951	-3.53089	-2.69887	-2.37128	-0.966742	-2.58735	0.091753	0.537269
GGGTGTTAGATTTCCGCACG	RIN1	Not Significant in Both and Not Common Essential	No	0.261957	0.177509	0.609945	0.477794	0.627549	0.17327	2.05555	0.000197408	1.40801	0.00855114	6.5069	0.00184565	1.16373	0.261957	0.239686	0.603813	0.205198	0.191453	0.000209542	0.000182687	0.00018746	0.00176006	0.00291933	0.00269502	0.00336465	0.0017354	-0.010497	0.527637	-3.38388	0.350958	-1.3172	1.02808	-2.41309	0.268205	-3.05837	-3.51919	-3.03926	-2.03653	-1.91436	-2.35034	-1.78523	-2.04266	-0.618722	-2.46825	0.0177292	0.248546
ATCTTACTTAAATGGCTCAG	KHDRBS2	Not Significant in Both and Not Common Essential	No	0.322844	0.0989955	0.626888	0.119449	0.356478	0.00021933	0.0915574	0.00197408	0.314788	0.000213778	0.0441021	0.000184565	0.741533	0.322844	0.0607204	0.277007	0.309479	0.0470787	0.000209542	0.000182687	0.00018746	0.000176006	0.000145966	0.000134751	0.000168232	0.00017354	-2.65452	-0.835497	-1.78182	-0.0540146	-2.66565	-1.15273	-2.81103	0.318098	-2.46206	-3.18078	-3.21772	-2.4273	-2.61908	-3.31296	-3.26472	-2.43342	-1.45465	-2.86476	0.029848	0.270057
AGCTTATGGAGGCATATCTG	SEC23B	Not Significant in Both and Not Common Essential	No	0.271868	0.3004	0.237201	0.621835	0.304491	0.0745721	0.000179524	0.503391	0.207419	0.000213778	0.000183759	0.300842	0.107158	0.271868	0.94596	0.964856	0.154739	0.624577	0.000209542	0.000182687	0.00018746	0.000176006	0.000145966	0.000134751	0.000168232	0.00017354	-0.605124	-3.12099	-0.0917697	-0.166726	-3.14774	-3.11087	-0.315337	-0.45355	-3.6546	-3.72275	-2.91669	-3.55006	-3.81162	-3.85493	-2.96369	-3.55619	-1.37651	-3.50382	0.0239651	0.0633161
CTTCGCCAGCTAGACTCTGG	CRTC2	Not Significant in Both and Not Common Essential	No	0.351163	0.0546182	0.155875	0.0632375	0.185665	0.0021933	1.40747	0.000197408	0.000244022	0.000213778	1.20546	0.000184565	0.00214316	0.351163	0.051133	0.0217871	0.0134556	0.169483	0.000209542	0.00182687	0.00018746	0.000176006	0.000145966	0.000134751	0.000168232	0.00017354	-1.39624	0.955663	-2.50561	-2.8813	-2.40737	0.888376	-2.53483	-1.93768	-2.38743	-1.07649	-1.85599	-2.9836	-2.54445	-2.20867	-1.90299	-2.98973	-1.47737	-2.24367	0.131058	0.476956
GATGGTCTCAAAGGAGACCC	SFTPA1	Not Significant in Both and Not Common Essential	No	0.184078	0.317468	0.223646	0.541032	0.813215	0.614123	4.32653	0.00592224	0.00732066	0.286463	3.66231	0.00738262	0.000214316	0.184078	0.207728	0.0404617	0.359937	0.0564944	0.000209542	0.00365373	0.00018746	0.000176006	0.00437899	0.00134751	0.000168232	0.00017354	0.286555	1.28658	-1.96074	-2.04566	-0.0446314	1.21419	-1.86501	-3.57915	-2.99622	-1.04431	-3.28332	-2.50648	-1.67612	-1.47751	-3.33032	-2.51261	-0.838482	-2.35336	0.0439977	0.314264
GCCCCCGGGTACCTTGTAGG	MORN1	Not Significant in Both and Not Common Essential	No	0.223725	0.501805	0.264309	0.0948562	0.248792	0.171077	2.53309	0.00197408	0.0780871	0.0833736	1.14665	0.00184565	0.00642947	0.223725	0.84689	0.591363	0.27584	0.709319	0.000209542	0.000182687	0.0018746	0.00176006	0.000145966	0.000134751	0.000168232	0.00017354	-0.467343	0.981539	-1.6817	-0.503257	-0.779506	0.637319	-1.71092	-1.58766	-3.60656	-3.51015	-2.16775	-2.60531	-3.76358	-3.64232	-3.21475	-3.61144	-0.638941	-3.26523	0.0120963	0.492147
TCGTGCTTATAGGATTCCAG	PRKAG2	Not Significant in Both and Not Common Essential	No	0.487098	0.2253	0.081326	0.358346	0.241365	0.0109665	0.000179524	0.0888336	1.37384	0.00213778	0.000183759	0.280539	0.572223	0.487098	0.27484	0.177409	0.857794	0.122405	0.000209542	0.000182687	0.00018746	0.000176006	0.00145966	0.000134751	0.000168232	0.00017354	-1.31269	-2.65611	-0.605725	0.755262	-2.0228	-2.64598	-0.106309	0.374891	-3.11781	-2.98727	-3.66047	-2.84227	-2.27483	-3.11944	-3.70747	-2.8484	-1.02743	-3.06975	0.0456336	0.947466
CCTGAAGTAATCGTTGCACA	TONSL	DepMap Common Essential	Yes	0.269036	0.0409637	0.599779	0.389964	0.122539	0.00438659	0.341096	0.410609	0.000244022	0.000213778	0.424483	0.0110739	0.000214316	0.269036	0.0575246	0.0746985	0.0370029	0.000313858	0.000209542	0.000182687	0.00018746	0.000176006	0.000145966	0.000134751	0.000168232	0.00017354	-0.970272	-0.245115	0.0224039	-2.70085	-2.28244	-0.150131	-1.54672	-2.75722	-2.43858	-2.6116	-2.29533	-0.251206	-2.5956	-2.74378	-2.34233	-0.257334	-1.32879	-1.94197	0.135951	0.300164
GACGTCCCGCAGGCGGAGGT	EID2	Not Significant in Both and Not Common Essential	No	0.18691	0.317468	0.132155	0.249437	0.282211	1.63181	0.0771954	0.000197408	0.10981	2.54183	0.147007	0.00184565	0.177882	0.18691	0.0639162	0.385942	0.033639	0.112989	0.000209542	0.000182687	0.00018746	0.000176006	0.00145966	0.00134751	0.00168232	0.00017354	0.71097	-0.233492	-3.1016	-0.409932	0.903447	0.0462544	-2.13081	-0.200442	-2.48434	-3.32481	-2.25393	-2.80751	-1.64136	-2.45699	-1.30093	-2.81364	-0.55195	-2.38544	0.0681989	0.33522
ATGGCCACGGTATAGAGCAG	OR9I1	Not Significant in Both and Not Common Essential	No	0.540905	0.512046	0.152486	1.00477	0.230225	0.021933	0.552935	0.000197408	0.695463	0.000213778	0.242562	0.000184565	1.09944	0.540905	0.23649	0.563351	0.780425	0.128682	0.000209542	0.00182687	0.00018746	0.000176006	0.000145966	0.000134751	0.000168232	0.00017354	-1.36821	0.559444	-3.7067	0.480122	-3.37935	0.201593	-3.73592	0.679019	-3.05254	-2.48907	-3.61942	-2.86399	-3.20956	-3.62125	-3.66642	-2.87012	-1.28375	-3.17405	0.01901	0.459
TAGGCCACCAGCCATAGTAG	GALNT13	Not Significant in Both and Not Common Essential	No	0.856669	0.74076	1.6909	1.35961	0.43817	2.02441	2.24226	0.377049	0.151294	1.80215	1.78797	0.208559	0.000214316	0.856669	0.543288	1.04889	0.602138	0.298165	0.00419084	0.000182687	0.0018746	0.00176006	0.00145966	0.000134751	0.000168232	0.00017354	0.436621	0.122568	-0.557017	-0.461821	0.386113	0.0242423	-0.814185	-3.31059	-2.11273	-3.75902	-2.50679	-2.22893	-2.57078	-3.8912	-3.55379	-3.23506	-0.521758	-2.98229	0.00675287	0.891712
GATGGTGACAATATTCGTCA	PAPSS1	Not Significant in Both and Not Common Essential	No	0.870828	0.498391	0.355801	0.404017	0.259932	1.33352	0.00359049	3.69745	0.00244022	0.622095	0.00367518	3.47352	0.00428632	0.870828	0.383497	0.298794	0.649233	1.38411	0.00209542	0.00182687	0.00018746	0.00176006	0.00145966	0.00134751	0.000168232	0.0017354	0.427429	-1.99605	0.961503	-2.02743	0.0962865	-1.98593	0.93437	-1.78278	-2.26249	-2.21366	-3.53949	-2.89564	-2.41951	-2.34584	-3.58649	-2.90177	-0.671575	-2.77061	0.0213109	0.277903
CGTTGGGCAGAGTACATGAA	SENP3	Not Significant in Both and Not Common Essential	No	0.608872	0.518873	0.437127	0.663993	0.631262	1.8665	0.00179524	0.00789632	0.812593	1.96035	0.00183759	0.00369131	0.69224	0.608872	0.316385	1.00532	0.417124	1.1142	0.000209542	0.000182687	0.00018746	0.000176006	0.000145966	0.000134751	0.00168232	0.00347079	0.555967	-2.38649	-1.92474	0.109663	0.577273	-2.37636	-2.25498	0.040047	-3.17894	-3.7406	-3.34736	-3.80144	-3.33596	-3.87277	-2.39436	-2.50653	-0.957452	-3.27225	0.0119285	0.755954
ACTGGCGGCTCACAACAGCC	SPDYC	Not Significant in Both and Not Common Essential	No	0.178414	0.00341364	0.0847145	0.017566	0.0185665	0.0021933	0.00179524	0.00197408	1.65447	0.000213778	0.00183759	0.000184565	2.41534	0.178414	0.0287623	0.37038	0.0941892	0.0345244	0.000209542	0.000182687	0.00018746	0.00352011	0.000145966	0.000134751	0.000168232	0.00017354	-0.19212	-1.67384	-0.949308	1.94993	-1.20325	-1.66371	-1.97852	2.11425	-2.13755	-3.30694	-2.70109	-0.99157	-2.29457	-3.43912	-2.74809	-2.29873	-0.449572	-2.48971	0.0903958	0.22978
CTTATTCTTTATTCCCATGG	NFKBIL1	Not Significant in Both and Not Common Essential	No	0.659847	1.01385	0.674328	0.481307	1.1437	0.168884	0.000179524	1.26736	0.531968	0.179574	0.00735035	1.62418	0.295756	0.659847	0.214119	0.367268	0.21529	0.429985	0.000209542	0.000182687	0.00018746	0.00352011	0.000145966	0.000134751	0.000168232	0.00017354	-0.778385	-3.57475	0.420478	-0.332427	-0.75173	-1.96256	0.528212	-0.587379	-3.00938	-3.30328	-3.06012	-2.0869	-3.1664	-3.43545	-3.10712	-3.39405	-0.879818	-3.07034	0.010219	0.275804
CATCCTAGAGCTCCACACAA	KDM7A	Not Significant in Both and Not Common Essential	No	0.576304	0.184337	0.725157	0.17566	0.0445597	0.0021933	3.30145	0.157926	0.00244022	0.000213778	3.43445	0.0442957	0.00214316	0.576304	0.0990701	0.245883	0.174923	0.740704	0.00209542	0.000182687	0.0018746	0.00176006	0.000145966	0.000134751	0.00168232	0.00017354	-1.92451	0.658273	-0.0462192	-1.26151	-2.93565	0.675425	-0.598311	-1.31789	-1.67467	-3.12902	-1.96994	-2.62412	-2.83169	-3.2612	-2.01694	-3.63025	-0.8438	-2.64223	0.0416363	0.376175
GACCATCGCAGAGACAGACG	SLC31A2	Not Significant in Both and Not Common Essential	No	0.311516	0.392569	0.199926	0.0210792	0.163386	1.51337	0.000179524	0.000197408	0.0292826	1.00903	0.00183759	0.000184565	0.000214316	0.311516	0.169378	0.186746	0.00033639	0.0282472	0.000209542	0.000182687	0.00018746	0.00176006	0.000145966	0.000134751	0.000168232	0.00017354	0.586029	-3.04675	-2.02849	-0.746605	0.409988	-2.03662	-2.0577	-2.88216	-2.90759	-3.00954	-0.253934	-1.20545	-3.06461	-3.14172	-0.300934	-2.21158	-1.47529	-2.01192	0.0707304	0.656862
TCCCTGCACACGTACGTCGG	TPM4	Not Significant in Both and Not Common Essential	No	0.14443	0.0614455	0.0881031	0.5059	0.430744	0.00021933	0.829402	0.373101	0.000244022	0.000213778	0.859991	0.256546	0.000214316	0.14443	0.143812	0.133835	0.171559	0.144375	0.000209542	0.000182687	0.00018746	0.000176006	0.00145966	0.000134751	0.000168232	0.00017354	-2.44739	0.973774	-0.132238	-3.24679	-2.45853	0.989503	-0.294899	-3.30316	-2.83652	-2.86486	-2.9615	-2.91396	-1.99354	-2.99704	-3.0085	-2.92009	-1.23997	-2.812	1.98893e-05	0.789407
CTACACCGCCCAGATCGGAG	TPSAB1	Not Significant in Both and Not Common Essential	No	0.397891	1.05481	0.206703	0.25295	0.300778	0.967244	0.000179524	0.25663	0.000244022	0.773878	0.000183759	0.319298	0.000214316	0.397891	0.268448	0.295682	0.0840975	0.235393	0.000209542	0.000182687	0.00018746	0.000176006	0.00145966	0.000134751	0.000168232	0.00017354	-0.0376382	-3.06122	0.00627274	-3.09082	-0.134502	-3.0511	0.101162	-3.14719	-3.10759	-3.20912	-2.65187	-3.12627	-2.26461	-3.34129	-2.69887	-3.13239	-1.55188	-2.9415	0.00734475	0.478308
CTGTTAGTAATTGCCGCAGG	IFNLR1	Not Significant in Both and Not Common Essential	No	0.603208	0.512046	0.559116	0.119449	0.219085	0.00021933	0.330325	0.00197408	0.395316	0.000213778	0.093717	0.000184565	0.364337	0.603208	0.294015	0.189859	0.178287	0.238532	0.000209542	0.000182687	0.00018746	0.000176006	0.000145966	0.000134751	0.000168232	0.00017354	-3.36821	-0.22856	-1.78182	0.256332	-3.37935	-0.775684	-2.81103	0.220891	-3.1471	-3.01672	-2.97821	-3.13202	-3.30412	-3.1489	-3.02521	-3.13815	-1.48343	-3.1113	0.0184906	0.0638388
TTGTTGGGGACATTAGGACT	FAM207A	Not Significant in Both and Not Common Essential	No	0.339835	0.314055	0.105046	0.555084	0.144819	0.0438659	0.000179524	0.93374	0.000244022	0.000213778	0.000183759	0.206713	0.000214316	0.339835	0.000319581	0.0840358	1.15045	0.081603	0.000209542	0.000182687	0.00018746	0.000176006	0.000145966	0.000134751	0.000168232	0.00017354	-0.854879	-2.76726	0.225867	-2.7734	-3.16704	-2.75713	-0.428991	-2.82977	-0.18331	-2.66276	-3.78796	-2.66618	-0.340329	-2.79493	-3.83496	-2.67231	-1.91908	-2.36784	0.194427	0.327893
TCAATCCGCTTACAAAAGTG	SLC27A2	Not Significant in Both and Not Common Essential	No	0.320012	0.573491	0.304972	0.0245923	0.0928327	1.80289	0.299806	0.000197408	0.000244022	2.73209	0.354654	0.000184565	0.000214316	0.320012	0.239686	0.245883	0.292659	0.134959	0.00209542	0.000182687	0.00018746	0.000176006	0.000145966	0.00134751	0.000168232	0.0017354	0.497443	-0.00741965	-2.09543	-2.58027	0.677968	0.0655449	-2.12465	-2.63665	-2.05837	-3.12902	-3.19345	-2.88467	-3.21539	-2.2612	-3.24045	-1.8908	-1.02543	-2.73417	0.00147738	0.340178
GCTGAATGGCTCTATAGTCA	CEP97	Not Significant in Both and Not Common Essential	No	0.312932	0.167268	1.02674	0.804521	0.360191	0.0021933	0.152596	1.77272	0.122011	0.000213778	0.198459	0.544468	0.00857263	0.312932	0.287623	0.389055	0.682872	0.191453	0.00209542	0.000182687	0.00018746	0.000176006	0.000145966	0.000134751	0.000168232	0.00017354	-1.88231	-0.827917	0.343103	-0.470134	-2.89345	-0.71379	-0.169565	-1.62342	-2.13755	-3.3283	-3.56143	-3.03653	-3.29457	-3.46048	-3.60843	-3.04266	-1.02969	-3.18375	0.0112583	0.505984
TGAGTACCAGTAACAAAAGG	AFTPH	Not Significant in Both and Not Common Essential	No	0.327092	0.314055	0.881031	0.0456715	0.133679	0.0285129	1.83294	0.270449	0.000244022	0.00213778	1.9019	0.0590609	0.00214316	0.327092	0.751016	0.108935	0.0840975	0.178899	0.00209542	0.000182687	0.00018746	0.000176006	0.000145966	0.000134751	0.00168232	0.00017354	-1.04196	0.318157	0.77244	-2.73863	-2.16704	0.334196	0.111655	-1.79501	-2.55438	-2.77546	-2.65187	-3.00708	-3.7114	-2.90764	-1.69887	-3.01321	-0.775775	-2.78999	0.0778838	0.61527
CATTACAACAACCTGCTACG	TMEM173	Not Significant in Both and Not Common Essential	No	0.481434	1.49859	0.972523	0.75885	0.382471	0.550517	0.208248	0.592224	0.402636	0.998345	0.295852	0.636751	0.154307	0.481434	0.210924	0.270782	0.232109	0.0910188	0.00209542	0.000182687	0.00018746	0.000176006	0.000145966	0.00134751	0.000168232	0.00017354	-0.434912	-0.669319	-0.10767	0.0223141	-0.176402	-0.516825	-0.0761863	-0.394213	-2.00285	-3.17091	-3.09278	-2.7136	-3.15987	-2.30309	-3.13978	-2.71973	-0.294152	-2.78783	0.0156391	0.177662
CATTACCCGCTGCAAGCCAG	SLURP1	Significant in Both and Not Common Essential	No	0.463026	0.4506	0.942026	0.442662	0.575563	0.339961	0.00538573	0.355335	0.153734	0.0128267	0.000183759	0.110739	0.2036	0.463026	0.325973	0.136947	0.548316	0.229116	0.000209542	0.000182687	0.00018746	0.000176006	0.000145966	0.000134751	0.000168232	0.00017354	-0.122362	-2.24282	-0.0954343	-0.573323	-1.54568	-3.70981	-0.601772	-0.451315	-3.19191	-2.87484	-3.46612	-3.11453	-3.34893	-3.00702	-3.51312	-3.12066	-1.16781	-3.20464	0.0104567	0.00665172
AGCGGCGCATTCCCTGACAG	SH3BGR	Not Significant in Both and Not Common Essential	No	0.293108	0.0682728	0.267698	0.200252	0.427031	0.00021933	0.240563	0.917948	0.0805273	0.00213778	0.0698283	0.919136	0.0771537	0.293108	0.0958743	0.0186746	0.100917	0.0502173	0.000209542	0.000182687	0.00018746	0.000176006	0.00145966	0.000134751	0.000168232	0.00017354	-2.49315	-0.0464163	0.661241	-0.724516	-1.50428	-0.583614	0.661803	-0.743103	-2.66043	-2.00954	-2.73106	-2.45533	-1.81745	-2.14172	-2.77806	-2.46145	-0.596505	-2.38188	0.0801922	0.811951
AAGGTCACACATAATGGCTG	TRIM36	Not Significant in Both and Not Common Essential	No	0.521081	1.48493	0.325304	0.284569	0.553283	4.32518	0.00179524	0.00197408	1.18107	2.0822	0.000183759	0.00553696	1.50664	0.521081	1.2208	0.124497	0.245565	0.338966	0.000209542	0.00365373	0.0018746	0.000176006	0.00145966	0.00134751	0.000168232	0.0017354	0.464298	-2.25817	-2.15882	0.329328	0.146816	-3.24804	-1.71092	0.435062	-3.76537	-1.53242	-2.11726	-3.28463	-2.92239	-1.96563	-3.16426	-2.29076	-1.00006	-2.63034	0.0651873	0.409425
AGGCGCGGTCCCACACAAGG	LENG9	Not Significant in Both and Not Common Essential	No	0.386563	0.576905	0.0745488	0.217818	0.95432	0.699662	0.00179524	0.118445	1.5959	0.113303	0.00183759	0.0332218	1.38019	0.386563	0.29721	0.308131	2.10244	0.15379	0.000209542	0.00182687	0.00018746	0.00176006	0.000145966	0.000134751	0.000168232	0.00017354	0.083784	-1.61832	-0.264577	0.223312	-0.706863	-1.60819	-0.816671	0.160245	-3.15179	-2.22703	-4.04981	-1.9414	-3.30881	-3.3592	-4.09682	-2.94753	-0.56841	-3.1353	0.150114	0.857957
AGCACCAGAGGGTGTCGGAG	TRMT1	Not Significant in Both and Not Common Essential	No	0.337004	0.33795	0.467624	0.126475	0.170812	2.86225	0.00179524	0.223071	0.000244022	2.34943	0.000183759	0.00184565	0.00214316	0.337004	0.616792	0.0435741	0.0773697	0.0627716	0.00209542	0.000182687	0.00018746	0.00176006	0.000145966	0.000134751	0.00168232	0.00017354	0.927855	-2.41577	0.246438	-2.84509	0.84211	-3.40565	-1.83586	-1.90146	-2.46887	-2.37752	-2.61566	-1.55224	-3.62589	-2.5097	-1.66266	-2.55836	-1.29843	-2.42136	0.110965	0.389232
ATAGTTCGGTGTGATAACTT	SELP	Significant in Both and Not Common Essential	No	0.256293	0.460841	0.267698	0.396991	0.311918	0.059219	0.502668	0.153978	0.214739	0.000213778	0.150682	0.0313761	0.0642947	0.256293	0.239686	0.305019	0.0470946	0.15379	0.000209542	0.000182687	0.00018746	0.000176006	0.000145966	0.000134751	0.000168232	0.00017354	-0.89109	0.273636	-0.411322	-0.16213	-3.33359	-0.249584	-1.10218	-0.685865	-3.05837	-3.22262	-2.40006	-2.9414	-3.21539	-3.35479	-2.44706	-2.94753	-0.820266	-2.9484	0.0116336	0.0181817
TCAAACGTGTCATCGTCACA	USP17L22	Not Significant in Both and Not Common Essential	No	0.291692	0.102409	0.308361	0.228358	0.475304	0.0021933	1.72702	0.410609	1.81796	0.00427557	1.19076	0.14027	3.25331	0.291692	0.159791	0.0840358	0.0235473	0.134959	0.000209542	0.00182687	0.00018746	0.000176006	0.000145966	0.00404253	0.00168232	0.0017354	-1.66924	0.748238	0.254812	0.582613	-1.37934	0.586765	-0.211651	0.835354	-2.88228	-1.66276	-2.09903	-2.88467	-3.0393	-1.31781	-1.14603	-1.8908	-0.0315567	-2.11534	0.0372354	0.0966416
GCTGATTTCCAGTCTCCGAG	TSPAN13	Not Significant in Both and Not Common Essential	No	0.337004	0.385741	0.162652	0.0562111	0.133679	0.00021933	0.00179524	0.00197408	0.77355	0.000213778	0.000183759	0.000184565	0.398627	0.337004	0.13742	0.239658	1.24464	0.323274	0.000209542	0.000182687	0.00018746	0.000176006	0.000145966	0.000134751	0.000168232	0.00017354	-3.2452	-1.95714	-1.45446	0.762425	-3.25633	-2.94701	-2.48367	0.474504	-2.81678	-3.11788	-3.82214	-3.26404	-2.9738	-3.25006	-3.86914	-3.27017	-1.76336	-3.298	0.0849502	0.58242
GCAAGCTGTTCAGAGGACAT	AFAP1L1	Not Significant in Both and Not Common Essential	No	0.474354	0.648591	0.43035	0.755336	0.341624	0.00021933	1.05022	1.43713	0.0683262	0.00427557	1.77511	2.09482	0.00214316	0.474354	0.147007	0.86837	0.174923	0.207146	0.000209542	0.00182687	0.0018746	0.000176006	0.00145966	0.000134751	0.00168232	0.00017354	-3.47087	0.387458	0.279356	-0.698961	-2.18098	0.615403	0.443007	-2.20249	-2.84607	-2.677	-1.96994	-3.07075	-2.00309	-3.80917	-2.01694	-3.07688	-0.85351	-2.68373	0.0523003	0.422225
TGGGATGCAGTATAGAGGAT	CTNNA1	Not Significant in Both and Not Common Essential	No	0.28886	0.0614455	0.881031	0.147554	0.193092	0.0021933	2.21712	0.00394816	0.00244022	0.00213778	3.32236	0.00369131	0.000214316	0.28886	0.19814	0.152509	0.0370029	0.229116	0.00209542	0.000182687	0.0018746	0.000176006	0.000145966	0.000134751	0.000168232	0.0017354	-1.44739	0.400798	-1.57256	-1.89834	-1.45853	0.576455	-1.60177	-2.95471	-1.9757	-2.92159	-1.29533	-3.11453	-3.13272	-3.05376	-2.34233	-2.12066	-1.2445	-2.49458	0.0130261	0.457266
[truncated: 76,687 more rows]
[truncated: 4 more columns]
