# Supplementary material for: Comprehensive Genomic Dependency Landscape of Human Colon Cancer
Source: Research Square preprint supplement (doi:10.21203/rs.3.rs-4438536/v1), 2024-06-04
Supplement: Supplementary file 4 [file d00ef27ad1affba702856850.xlsx]

## Sheet: Sheet1
Drug	Cy5=Blast (TP53WT & TP53KO) ; DMSO Ct minus sample Ct	HEX=TP53KO; DMSO Ct minus sample Ct	FAM=TP53WT; DMSO Ct minus sample Ct	TP53 WT minus TP53 KO	Drug
Abiraterone	-13.67	-12.18	-12.38	-0.2	Abiraterone
Abiraterone 1:10	-0.4	-0.27	-0.67	-0.4	Abiraterone
Abiraterone 1:100	-0.3	-0.01	-0.48	-0.47	Abiraterone
Abiraterone 1:1000	0.05	0.27	-0.27	-0.54	Abiraterone
Afatinib	-2.24	-1.83	-2.35	-0.52	Afatinib
Afatinib 1:10	-0.8	-0.68	-1.03	-0.35	Afatinib
Afatinib 1:100	-1.15	-0.92	-1.05	-0.13	Afatinib
Afatinib 1:1000	-0.62	-0.44	-0.73	-0.29	Afatinib
Alectinib	-13.27	-15.17	-13.26	1.91	Alectinib
Alectinib 1:10	-0.3	-0.31	-0.52	-0.21	Alectinib
Alectinib 1:100	-0.3	-0.03	-0.5	-0.47	Alectinib
Alectinib 1:1000	0.76	0.96	0.45	-0.51	Alectinib
Allopurinol	-0.71	-0.66	-0.66	0	Allopurinol
Allopurinol 1:10	-0.32	-0.04	-0.46	-0.42	Allopurinol
Allopurinol 1:100	-0.67	-0.45	-0.69	-0.24	Allopurinol
Allopurinol 1:1000	0.23	0.4	0.06	-0.34	Allopurinol
Altretamine	-0.68	-0.46	-0.62	-0.16	Altretamine
Altretamine 1:10	-1.42	-1.1	-1.1	0	Altretamine
Altretamine 1:100	-0.7	-0.65	-0.7	-0.05	Altretamine
Altretamine 1:1000	0.15	0.33	0.15	-0.18	Altretamine
Amifostine	0.82	0.96	0.62	-0.34	Amifostine
Amifostine 1:10	-0.59	-0.23	-0.49	-0.26	Amifostine
Amifostine 1:100	-0.76	-0.48	-0.57	-0.09	Amifostine
Amifostine 1:1000	-0.36	0.02	-0.53	-0.55	Amifostine
Aminolevulinic acid hydrochloride	-0.94	-0.61	-0.72	-0.11	Aminolevulinicacid
Aminolevulinic acid hydrochloride 1:10	0.58	0.71	0.39	-0.32	Aminolevulinicacid
Aminolevulinic acid hydrochloride 1:100	0.03	0.32	-0.02	-0.34	Aminolevulinicacid
Aminolevulinic acid hydrochloride 1:1000	0.2	0.42	0.09	-0.33	Aminolevulinicacid
Anastrozole	0.13	0.29	0.11	-0.18	Anastrozole
Anastrozole 1:10	-1	-0.78	-0.91	-0.14	Anastrozole
Anastrozole 1:100	-0.49	-0.28	-0.52	-0.24	Anastrozole
Anastrozole 1:1000	0.85	0.96	0.43	-0.53	Anastrozole
Arsenic trioxide	-1.66	-1.14	-1.57	-0.43	Arsenictrioxide
Arsenic trioxide 1:10	-0.85	-0.56	-0.8	-0.24	Arsenictrioxide
Arsenic trioxide 1:100	-0.46	-0.23	-0.36	-0.13	Arsenictrioxide
Arsenic trioxide 1:1000	0.15	0.34	0.1	-0.24	Arsenictrioxide
Axitinib	-8.5	-8.65	-8.59	0.06	Axitinib
Axitinib 1:10	-5.16	-3.52	-3.29	0.23	Axitinib
Axitinib 1:100	-1.51	-1.21	-1.43	-0.22	Axitinib
Axitinib 1:1000	0.89	0.96	0.53	-0.43	Axitinib
Azacitidine	-8.44	-8.61	-8.12	0.49	Azacitidine
Azacitidine 1:10	-1.85	-1.57	-1.6	-0.03	Azacitidine
Azacitidine 1:100	-1	-0.79	-0.96	-0.17	Azacitidine
Azacitidine 1:1000	-0.96	-0.79	-0.94	-0.15	Azacitidine
Belinostat	-11.67	-10.49	-11.02	-0.54	Belinostat
Belinostat 1:10	-1.9	-1.44	-2.01	-0.57	Belinostat
Belinostat 1:100	-0.53	-0.15	-0.45	-0.3	Belinostat
Belinostat 1:1000	0.19	0.4	0.11	-0.29	Belinostat
Bendamustine hydrochloride	0.02	0.04	0.28	0.24	Bendamustine
Bendamustine hydrochloride 1:10	0.79	0.73	0.9	0.17	Bendamustine
Bendamustine hydrochloride 1:100	0.13	0.2	0.39	0.18	Bendamustine
Bendamustine hydrochloride 1:1000	1.2	1.26	1.44	0.18	Bendamustine
Bleomycin sulfate	-0.61	-0.6	-0.67	-0.08	Bleomycinsulfate
Bleomycin sulfate 1:10	0.13	0.22	0.31	0.09	Bleomycinsulfate
Bleomycin sulfate 1:100	-0.45	-0.53	-0.21	0.31	Bleomycinsulfate
Bleomycin sulfate 1:1000	0.54	0.48	0.62	0.14	Bleomycinsulfate
Bortezomib	-10.78	-10.86	-14.91	-4.05	Bortezomib
Bortezomib 1:10	-10.08	-12.08	-11.81	0.27	Bortezomib
Bortezomib 1:100	-10.91	-12.68	-11.87	0.81	Bortezomib
Bortezomib 1:1000	-10.3	-10.87	-10.13	0.74	Bortezomib
Bosutinib	-0.19	-0.19	0.03	0.21	Bosutinib
Bosutinib 1:10	0.16	0.18	0.39	0.21	Bosutinib
Bosutinib 1:100	-0.84	-0.93	-0.62	0.3	Bosutinib
Bosutinib 1:1000	-11.39	-12.68	-14.91	-2.23	Bosutinib
Busulfan	-0.33	-0.27	-0.06	0.2	Busulfan
Busulfan 1:10	0	0.15	0.4	0.25	Busulfan
Busulfan 1:100	0.4	0.23	0.55	0.31	Busulfan
Busulfan 1:1000	-5.45	-5.99	-5.08	0.91	Busulfan
Cabazitaxel	-9.74	-11.27	-9.13	2.14	Cabazitaxel
Cabazitaxel 1:10	-11.5	-12.23	-14.49	-2.26	Cabazitaxel
Cabazitaxel 1:100	-10.86	-11.47	-10	1.47	Cabazitaxel
Cabazitaxel 1:1000	0.18	0.33	0.18	-0.16	Cabazitaxel
Cabozantinib	-7.01	-7.23	-7.6	-0.37	Cabozantinib
Cabozantinib 1:10	0.36	0.23	0.63	0.39	Cabozantinib
Cabozantinib 1:100	-0.27	-0.25	-0.28	-0.03	Cabozantinib
Cabozantinib 1:1000	0.13	0.11	0.49	0.37	Cabozantinib
Capecitabine	0.45	0.4	0.61	0.2	Capecitabine
Capecitabine 1:10	0.81	0.88	0.97	0.09	Capecitabine
Capecitabine 1:100	0.16	0	0.21	0.21	Capecitabine
Capecitabine 1:1000	-0.21	-0.52	-0.87	-0.35	Capecitabine
Carboplatin	-0.1	0.06	0.16	0.09	Carboplatin
Carboplatin 1:10	0.86	0.81	0.88	0.07	Carboplatin
Carboplatin 1:100	-1.66	-1.6	-1.53	0.07	Carboplatin
Carboplatin 1:1000	0.59	0.49	0.72	0.22	Carboplatin
Carfilzomib	-11.91	-11.88	-14.91	-3.03	Carfilzomib
Carfilzomib 1:10	-9.56	-10.74	-9.21	1.53	Carfilzomib
Carfilzomib 1:100	-11.55	-11.27	-11.74	-0.47	Carfilzomib
Carfilzomib 1:1000	0.32	0.18	0.57	0.39	Carfilzomib
Carmustine	0.93	0.91	0.87	-0.05	Carmustine
Carmustine 1:10	0.79	0.67	0.8	0.12	Carmustine
Carmustine 1:100	0.11	0.11	-0.06	-0.18	Carmustine
Carmustine 1:1000	0	-0.05	0.3	0.35	Carmustine
Celecoxib	1.76	1.71	1.45	-0.25	Celecoxib
Celecoxib 1:10	2.18	2.22	1.8	-0.41	Celecoxib
Celecoxib 1:100	2.39	2.3	1.82	-0.47	Celecoxib
Celecoxib 1:1000	2.2	2.14	1.77	-0.36	Celecoxib
Ceritinib	-7.37	-7.75	-9.34	-1.59	Ceritinib
Ceritinib 1:10	2.02	1.7	1.69	0	Ceritinib
Ceritinib 1:100	1.14	1.24	1.17	-0.06	Ceritinib
Ceritinib 1:1000	2.36	2.36	1.85	-0.5	Ceritinib
Chlorambucil	1.62	1.73	1.26	-0.46	Chlorambucil
Chlorambucil 1:10	2.29	2.32	1.81	-0.5	Chlorambucil
Chlorambucil 1:100	1.53	1.4	1.03	-0.36	Chlorambucil
Chlorambucil 1:1000	2.1	1.95	1.48	-0.46	Chlorambucil
Cladribine	-9.85	-9.27	-9.16	0.11	Cladribine
Cladribine 1:10	-10.98	-11.18	-11.87	-0.69	Cladribine
Cladribine 1:100	-9.68	-12.44	-9.55	2.89	Cladribine
Cladribine 1:1000	1.64	1.7	1.36	-0.33	Cladribine
Clofarabine	-8.67	-8.55	-10.35	-1.8	Clofarabine
Clofarabine 1:10	-9.43	-12.44	-9.31	3.13	Clofarabine
Clofarabine 1:100	1.51	1.36	1.24	-0.11	Clofarabine
Clofarabine 1:1000	1.31	1.35	1.1	-0.24	Clofarabine
Cobimetinib	-11.21	-12.44	-12.8	-0.36	Cobimetinib
Cobimetinib 1:10	-7.8	-8.6	-9.19	-0.59	Cobimetinib
Cobimetinib 1:100	-0.43	-0.51	-0.52	0	Cobimetinib
Cobimetinib 1:1000	2.01	2.05	1.58	-0.46	Cobimetinib
Crizotinib	-10.71	-8.79	-14.81	-6.02	Crizotinib
Crizotinib 1:10	2.34	2.38	1.82	-0.55	Crizotinib
Crizotinib 1:100	0.75	0.92	0.74	-0.17	Crizotinib
Crizotinib 1:1000	0.64	0.86	0.56	-0.29	Crizotinib
Cyclophosphamide	1.74	1.55	1.51	-0.03	Cyclophosphamide
Cyclophosphamide 1:10	1.83	2.02	1.72	-0.29	Cyclophosphamide
Cyclophosphamide 1:100	1.08	1.18	0.96	-0.21	Cyclophosphamide
Cyclophosphamide 1:1000	1.3	1.49	1.23	-0.25	Cyclophosphamide
Cytarabine hydrochloride	-9.13	-12.44	-9.2	3.24	Cytarabine
Cytarabine hydrochloride 1:10	-11.21	-9.46	-9.81	-0.35	Cytarabine
Cytarabine hydrochloride 1:100	0.92	1.01	0.69	-0.31	Cytarabine
Cytarabine hydrochloride 1:1000	0.52	0.54	0.62	0.09	Cytarabine
DMSO	-0.29	-0.22	-0.17	0.05	DMSO
DMSO	-0.13	-0.04	-0.12	-0.07	DMSO
DMSO	0.01	0	-0.02	-0.01	DMSO
DMSO	0.34	0.28	0.38	0.1	DMSO
DMSO	0.35	0.22	0.3	0.09	DMSO
DMSO 1:10	-0.56	-0.53	-0.35	0.18	DMSO
DMSO 1:10	-0.2	-0.41	-0.14	0.27	DMSO
DMSO 1:10	-0.1	-0.06	-0.03	0.03	DMSO
DMSO 1:10	-0.04	0.06	-0.08	-0.13	DMSO
DMSO 1:10	0.56	0.67	0.47	-0.19	DMSO
DMSO 1:100	-0.12	-0.21	-0.24	-0.03	DMSO
DMSO 1:100	-0.12	-0.07	-0.04	0.03	DMSO
DMSO 1:100	0.05	-0.16	-0.07	0.09	DMSO
DMSO 1:100	0.33	0.42	0.26	-0.15	DMSO
DMSO 1:100	0.53	0.57	0.53	-0.03	DMSO
DMSO 1:1000	-1.44	-1.45	-1.31	0.14	DMSO
DMSO 1:1000	-0.31	-0.46	-0.18	0.29	DMSO
DMSO 1:1000	-0.12	-0.02	-0.1	-0.08	DMSO
DMSO 1:1000	0.44	0.52	0.3	-0.23	DMSO
DMSO 1:1000	0.82	0.9	0.59	-0.31	DMSO
DMSO Blank	0.31	0.27	0.64	0.36	DMSO
DMSO Blank 1:10	0.63	0.72	0.71	-0.01	DMSO
DMSO Blank 1:100	-0.73	-0.7	-1.44	-0.74	DMSO
DMSO Blank 1:1000	-0.21	-0.3	0.1	0.39	DMSO
No Drug	0.17	0.1	0.18	0.08	DMSO
No Drug 1:10	0.04	0.03	0.04	0.01	DMSO
No Drug 1:100	0.22	0.23	0.27	0.04	DMSO
No Drug 1:1000	-0.67	-0.52	-0.4	0.12	DMSO
Dabrafenib mesylate	0.32	0.26	0.5	0.25	Dabrafenibmesylate
Dabrafenib mesylate 1:10	0.17	0.33	0.71	0.39	Dabrafenibmesylate
Dabrafenib mesylate 1:100	1.78	1.67	1.7	0.04	Dabrafenibmesylate
Dabrafenib mesylate 1:1000	0.04	-0.05	-0.14	-0.08	Dabrafenibmesylate
Dacarbazine	1.17	1.29	1.06	-0.22	Dacarbazine
Dacarbazine 1:10	2	1.95	1.78	-0.16	Dacarbazine
Dacarbazine 1:100	1.15	1.12	1.1	-0.01	Dacarbazine
Dacarbazine 1:1000	1.63	1.62	1.46	-0.15	Dacarbazine
Dactinomycin	-10.73	-9.91	-9.3	0.61	Dactinomycin
Dactinomycin 1:10	-9.01	-9.1	-9.39	-0.29	Dactinomycin
Dactinomycin 1:100	-8.82	-10.53	-8.58	1.95	Dactinomycin
Dactinomycin 1:1000	-10.65	-8.84	-11.27	-2.43	Dactinomycin
Dasatinib	-2.67	-2.37	-3.09	-0.72	Dasatinib
Dasatinib 1:10	-0.07	0.1	0.08	-0.01	Dasatinib
Dasatinib 1:100	1.44	1.46	1.43	-0.02	Dasatinib
Dasatinib 1:1000	2.13	2.2	1.82	-0.37	Dasatinib
Daunorubicin hydrochloride	-9.95	-7.93	-8.3	-0.37	Daunorubicin
Daunorubicin hydrochloride 1:10	-8.6	-12.44	-8.41	4.03	Daunorubicin
Daunorubicin hydrochloride 1:100	-7.52	-7.67	-6.04	1.63	Daunorubicin
Daunorubicin hydrochloride 1:1000	1.73	1.9	1.62	-0.27	Daunorubicin
Decitabine	-6.56	-6.76	-6.51	0.25	Decitabine
Decitabine 1:10	-0.91	-0.68	-0.93	-0.24	Decitabine
Decitabine 1:100	-0.35	-0.49	-0.26	0.24	Decitabine
Decitabine 1:1000	1.86	1.91	1.69	-0.21	Decitabine
Dexrazoxane	0.5	0.6	0.33	-0.26	Dexrazoxane
Dexrazoxane 1:10	1.39	1.33	1.36	0.04	Dexrazoxane
Dexrazoxane 1:100	0.32	0.38	0.2	-0.17	Dexrazoxane
Dexrazoxane 1:1000	1	1.19	1.01	-0.17	Dexrazoxane
Docetaxel	-6.96	-6.81	-7.79	-0.98	Docetaxel
Docetaxel 1:10	-7.79	-9.24	-8.7	0.54	Docetaxel
Docetaxel 1:100	-7.42	-6.86	-8.64	-1.78	Docetaxel
Docetaxel 1:1000	-7.44	-9.39	-9.64	-0.25	Docetaxel
Doxorubicin hydrochloride	-10.44	-12.42	-9.53	2.89	Doxorubicin
Doxorubicin hydrochloride 1:10	-5.82	-5.76	-6.3	-0.54	Doxorubicin
Doxorubicin hydrochloride 1:100	-1.15	-1.1	-1.4	-0.3	Doxorubicin
Doxorubicin hydrochloride 1:1000	1.43	1.37	1.26	-0.1	Doxorubicin
Enzalutamide	-0.05	0.1	-0.08	-0.17	Enzalutamide
Enzalutamide 1:10	1.19	1.24	1.1	-0.13	Enzalutamide
Enzalutamide 1:100	0.16	0.08	0.12	0.05	Enzalutamide
Enzalutamide 1:1000	0.69	0.87	0.75	-0.11	Enzalutamide
Epirubicin hydrochloride	-11.21	-8.69	-9.31	-0.62	Epirubicin
Epirubicin hydrochloride 1:10	-6.15	-7.23	-5.38	1.85	Epirubicin
Epirubicin hydrochloride 1:100	-6.36	-6.05	-5.99	0.06	Epirubicin
Epirubicin hydrochloride 1:1000	1.18	1.14	0.94	-0.19	Epirubicin
Erismodegib	0.54	0.39	0.41	0.03	Erismodegib
Erismodegib 1:10	0.37	0.4	0.53	0.14	Erismodegib
Erismodegib 1:100	0.73	0.81	0.7	-0.1	Erismodegib
Erismodegib 1:1000	-2.67	-2.58	-2.3	0.28	Erismodegib
Erlotinib hydrochloride	0.44	0.23	0.35	0.13	Erlotinib
Erlotinib hydrochloride 1:10	1.29	1.26	1.47	0.22	Erlotinib
Erlotinib hydrochloride 1:100	0.83	0.87	0.83	-0.03	Erlotinib
Erlotinib hydrochloride 1:1000	0.7	0.76	0.88	0.13	Erlotinib
Estramustine phosphate sodium	-0.22	-0.11	-0.26	-0.15	Estramustine
Estramustine phosphate sodium 1:10	0.96	1.11	1.18	0.08	Estramustine
Estramustine phosphate sodium 1:100	0	0.2	0.1	-0.09	Estramustine
Estramustine phosphate sodium 1:1000	0.5	0.36	0.38	0.03	Estramustine
Etoposide	-8.33	-8.63	-7.59	1.04	Etoposide
Etoposide 1:10	-5.41	-7.31	-4.38	2.93	Etoposide
Etoposide 1:100	-0.55	-0.54	-0.44	0.11	Etoposide
Etoposide 1:1000	-0.43	-0.41	-0.33	0.09	Etoposide
Everolimus	-0.23	-0.66	-0.37	0.3	Everolimus
Everolimus 1:10	-0.53	-0.49	-0.35	0.15	Everolimus
Everolimus 1:100	-0.41	-0.45	-0.29	0.17	Everolimus
Everolimus 1:1000	-0.07	-0.15	0	0.15	Everolimus
Exemestane	-0.02	-0.12	-0.13	0	Exemestane
Exemestane 1:10	-0.67	-0.59	-0.51	0.09	Exemestane
Exemestane 1:100	-0.05	-0.02	-0.04	-0.02	Exemestane
Exemestane 1:1000	-0.44	-0.32	-0.13	0.2	Exemestane
Floxuridine	-1.86	-1.59	-1.64	-0.05	Floxuridine
Floxuridine 1:10	-1.11	-0.96	-1.02	-0.05	Floxuridine
Floxuridine 1:100	-0.76	-0.52	-0.49	0.04	Floxuridine
Floxuridine 1:1000	0.11	-0.01	-0.12	-0.1	Floxuridine
Fludarabine phosphate	-13.69	-14.43	-10.71	3.72	Fludarabine
Fludarabine phosphate 1:10	-1.21	-1.1	-0.99	0.11	Fludarabine
Fludarabine phosphate 1:100	-0.01	-0.03	0.19	0.22	Fludarabine
Fludarabine phosphate 1:1000	-0.35	-0.1	-0.23	-0.12	Fludarabine
Fluorouracil	-2.03	-1.46	-1.6	-0.14	Fluorouracil
Fluorouracil 1:10	-1.07	-0.82	-0.68	0.14	Fluorouracil
Fluorouracil 1:100	-0.69	-0.65	-0.46	0.2	Fluorouracil
Fluorouracil 1:1000	-0.25	-0.21	-0.19	0.03	Fluorouracil
Fulvestrant	-0.49	-0.36	-0.04	0.33	Fulvestrant
Fulvestrant 1:10	-0.86	-0.93	-0.56	0.38	Fulvestrant
Fulvestrant 1:100	-0.56	-0.25	-0.2	0.06	Fulvestrant
Fulvestrant 1:1000	-0.53	-0.45	-0.41	0.05	Fulvestrant
Gefitinib	-1.06	-0.95	-0.6	0.36	Gefitinib
Gefitinib 1:10	-0.58	-0.19	-0.3	-0.1	Gefitinib
Gefitinib 1:100	-0.13	0.05	0.13	0.08	Gefitinib
Gefitinib 1:1000	-0.19	-0.23	-0.15	0.08	Gefitinib
Gemcitabine hydrochloride	-11.92	-10.63	-10.79	-0.16	Gemcitabine
Gemcitabine hydrochloride 1:10	-13.34	-11.56	-12.45	-0.89	Gemcitabine
Gemcitabine hydrochloride 1:100	-9.97	-10.02	-8.58	1.44	Gemcitabine
Gemcitabine hydrochloride 1:1000	-0.53	-0.48	-0.39	0.09	Gemcitabine
Hydroxyurea	-0.08	0.08	-0.19	-0.26	Hydroxyurea
Hydroxyurea 1:10	-0.37	-0.36	-0.36	0.01	Hydroxyurea
Hydroxyurea 1:100	-0.36	-0.14	-0.24	-0.1	Hydroxyurea
Hydroxyurea 1:1000	0.1	0.49	0.12	-0.37	Hydroxyurea
Ibrutinib	-0.22	0.05	0.01	-0.03	Ibrutinib
Ibrutinib 1:10	-1.33	-1.16	-0.97	0.19	Ibrutinib
Ibrutinib 1:100	-0.22	-0.26	-0.21	0.06	Ibrutinib
Ibrutinib 1:1000	-0.53	-0.49	-0.33	0.17	Ibrutinib
Idarubicin hydrochloride	-12.82	-10.65	-10.09	0.56	Idarubicin
Idarubicin hydrochloride 1:10	-14.88	-13.69	-13.66	0.03	Idarubicin
Idarubicin hydrochloride 1:100	-9.76	-11.02	-8.9	2.12	Idarubicin
Idarubicin hydrochloride 1:1000	-1.53	-1.09	-1.27	-0.18	Idarubicin
Idelalisib	0.17	0.1	0.15	0.06	Idelalisib
Idelalisib 1:10	0.22	-0.01	0.11	0.12	Idelalisib
Idelalisib 1:100	-0.11	0	-0.13	-0.12	Idelalisib
Idelalisib 1:1000	-0.42	-0.42	-0.29	0.14	Idelalisib
Ifosfamide	-0.86	-0.79	-0.49	0.31	Ifosfamide
Ifosfamide 1:10	0.26	0.19	0.12	-0.07	Ifosfamide
Ifosfamide 1:100	-0.67	-0.46	-0.42	0.05	Ifosfamide
Ifosfamide 1:1000	-0.43	-0.12	-0.23	-0.1	Ifosfamide
Imatinib	-0.41	-0.32	-0.29	0.04	Imatinib
Imatinib 1:10	-0.24	-0.23	-0.18	0.05	Imatinib
Imatinib 1:100	-0.82	-0.74	-0.47	0.28	Imatinib
Imatinib 1:1000	0.28	0.34	0.23	-0.1	Imatinib
Imiquimod	-0.58	-0.62	-0.4	0.23	Imiquimod
Imiquimod 1:10	0.18	0.15	0.17	0.03	Imiquimod
Imiquimod 1:100	-0.94	-0.77	-0.64	0.14	Imiquimod
Imiquimod 1:1000	0.24	0.3	0.31	0.01	Imiquimod
Ixabepilone	-10.56	-9.66	-9	0.66	Ixabepilone
Ixabepilone 1:10	-9.18	-8.56	-8.99	-0.43	Ixabepilone
Ixabepilone 1:100	-10.28	-9.83	-9.37	0.46	Ixabepilone
Ixabepilone 1:1000	-1.14	-0.83	-1.33	-0.49	Ixabepilone
Ixazomib citrate	-11.7	-10.49	-11.87	-1.38	Ixazomibcitrate
Ixazomib citrate 1:10	-11.18	-10.46	-10.56	-0.1	Ixazomibcitrate
Ixazomib citrate 1:100	-3.84	-2.96	-3.4	-0.44	Ixazomibcitrate
Ixazomib citrate 1:1000	0.05	0.12	0	-0.11	Ixazomibcitrate
Lapatinib	-1.43	-1.27	-1	0.27	Lapatinib
Lapatinib 1:10	0.14	0.16	0.04	-0.11	Lapatinib
Lapatinib 1:100	-0.68	-0.57	-0.41	0.16	Lapatinib
Lapatinib 1:1000	0.1	0.19	0.09	-0.09	Lapatinib
Lenalidomide	-1.05	-0.89	-0.75	0.14	Lenalidomide
Lenalidomide 1:10	0.1	0.03	-0.13	-0.15	Lenalidomide
Lenalidomide 1:100	-0.81	-0.78	-0.56	0.23	Lenalidomide
Lenalidomide 1:1000	0.05	-0.1	-0.02	0.09	Lenalidomide
Letrozole	-0.48	-0.37	-0.33	0.05	Letrozole
Letrozole 1:10	-0.11	-0.32	-0.1	0.22	Letrozole
Letrozole 1:100	-0.51	-0.24	-0.29	-0.04	Letrozole
Letrozole 1:1000	-0.22	-0.27	-0.23	0.05	Letrozole
Lomustine	0.01	-0.05	-0.09	-0.03	Lomustine
Lomustine 1:10	0.23	0.38	0.17	-0.2	Lomustine
Lomustine 1:100	0.26	0.19	0.21	0.02	Lomustine
Lomustine 1:1000	-0.05	-0.12	-0.04	0.09	Lomustine
Mechlorethamine hydrochloride	-0.17	-0.33	-0.03	0.31	Mechlorethamine
Mechlorethamine hydrochloride 1:10	-0.03	0.1	0	-0.09	Mechlorethamine
Mechlorethamine hydrochloride 1:100	-0.4	-0.36	-0.31	0.06	Mechlorethamine
Mechlorethamine hydrochloride 1:1000	-0.36	-0.4	-0.13	0.28	Mechlorethamine
Megestrol acetate	0.15	0.08	-0.14	-0.22	Megestrolacetate
Megestrol acetate 1:10	1.24	0.79	0.39	-0.4	Megestrolacetate
Megestrol acetate 1:100	-0.9	-0.84	-1.02	-0.18	Megestrolacetate
Megestrol acetate 1:1000	0.74	0.68	0.3	-0.38	Megestrolacetate
Melphalan hydrochloride	-1.68	-1.59	-1.85	-0.26	Melphalan
Melphalan hydrochloride 1:10	0.45	0.4	0.15	-0.25	Melphalan
Melphalan hydrochloride 1:100	0.42	0.26	-0.08	-0.34	Melphalan
Melphalan hydrochloride 1:1000	0.45	0.4	0.25	-0.15	Melphalan
Mercaptopurine	-2.63	-2.35	-2.53	-0.18	Mercaptopurine
Mercaptopurine 1:10	0.59	0.36	0.12	-0.24	Mercaptopurine
Mercaptopurine 1:100	-0.81	-0.82	-0.98	-0.16	Mercaptopurine
Mercaptopurine 1:1000	0.82	0.69	0.51	-0.18	Mercaptopurine
Methotrexate	-0.05	-0.5	-0.47	0.03	Methotrexate
Methotrexate 1:10	-0.37	-0.13	-0.43	-0.3	Methotrexate
Methotrexate 1:100	-0.9	-0.97	-1.14	-0.17	Methotrexate
Methotrexate 1:1000	0.1	0.22	-0.21	-0.43	Methotrexate
Methoxsalen	-0.56	-0.36	-0.56	-0.2	Methoxsalen
Methoxsalen 1:10	0.44	0.33	0.02	-0.31	Methoxsalen
Methoxsalen 1:100	0.32	0.22	-0.03	-0.25	Methoxsalen
Methoxsalen 1:1000	0.3	0.2	0.06	-0.14	Methoxsalen
Mitomycin	-10.86	-14.46	-14.12	0.34	Mitomycin
Mitomycin 1:10	-9.43	-14.46	-9.2	5.26	Mitomycin
Mitomycin 1:100	-0.34	0.04	-0.46	-0.5	Mitomycin
Mitomycin 1:1000	-0.42	-0.26	-0.43	-0.17	Mitomycin
Mitotane	0.25	0.6	0.5	-0.1	Mitotane
Mitotane 1:10	0.18	0.03	-0.1	-0.13	Mitotane
Mitotane 1:100	-1.43	-1.39	-1.19	0.2	Mitotane
Mitotane 1:1000	-0.59	-0.77	-0.69	0.08	Mitotane
Mitoxantrone	-12.06	-14.46	-13.43	1.03	Mitoxantrone
Mitoxantrone 1:10	-8.71	-11.87	-7.98	3.89	Mitoxantrone
Mitoxantrone 1:100	-8.58	-8.71	-7.77	0.94	Mitoxantrone
Mitoxantrone 1:1000	-1.05	-0.79	-1.21	-0.42	Mitoxantrone
Nelarabine	-2.48	-2.25	-2.06	0.19	Nelarabine
Nelarabine 1:10	0.9	0.63	0.55	-0.08	Nelarabine
Nelarabine 1:100	-0.22	-0.1	-0.12	-0.02	Nelarabine
Nelarabine 1:1000	0.09	0.1	-0.06	-0.16	Nelarabine
Nilotinib	-0.09	-0.03	-0.12	-0.09	Nilotinib
Nilotinib 1:10	0.42	0.46	0.38	-0.08	Nilotinib
Nilotinib 1:100	-0.15	-0.14	-0.23	-0.09	Nilotinib
Nilotinib 1:1000	0.08	0.17	-0.16	-0.33	Nilotinib
Nutlin	-0.69	-0.24	-0.9	-0.66	Nutlin
Nutlin 1:10	0.06	0.42	-0.34	-0.76	Nutlin
Nutlin 1:100	-0.47	-0.04	-0.4	-0.36	Nutlin
Nutlin 1:1000	-0.98	-0.81	-0.95	-0.14	Nutlin
Olaparib	0.42	0.35	0.17	-0.18	Olaparib
Olaparib 1:10	1.15	1.04	0.68	-0.36	Olaparib
Olaparib 1:100	-0.28	0.08	-0.25	-0.33	Olaparib
Olaparib 1:1000	0.3	0.47	0.2	-0.27	Olaparib
Omacetaxine mepesuccinate	-12.28	-9.08	-10.07	-0.99	Omacetaxinemepe
Omacetaxine mepesuccinate 1:10	-10.81	-9.53	-9.61	-0.08	Omacetaxinemepe
Omacetaxine mepesuccinate 1:100	-2.57	-2.24	-2.59	-0.35	Omacetaxinemepe
Omacetaxine mepesuccinate 1:1000	0.35	0.55	0.21	-0.34	Omacetaxinemepe
Osimertinib	-1.69	-1.13	-1.5	-0.37	Osimertinib
Osimertinib 1:10	0.79	1.14	0.63	-0.51	Osimertinib
Osimertinib 1:100	0.3	0.34	0.08	-0.26	Osimertinib
Osimertinib 1:1000	-0.6	-0.59	-0.59	0	Osimertinib
Paclitaxel	-8.58	-8.17	-10.87	-2.7	Paclitaxel
Paclitaxel 1:10	-8.01	-9.62	-9.11	0.51	Paclitaxel
Paclitaxel 1:100	-9.51	-11.06	-8.94	2.12	Paclitaxel
Paclitaxel 1:1000	-0.63	-0.17	-0.73	-0.56	Paclitaxel
Palbociclib	-2.27	-1.8	-2.36	-0.56	Palbociclib
Palbociclib 1:10	-0.68	-0.68	-0.79	-0.11	Palbociclib
Palbociclib 1:100	0.69	0.82	0.43	-0.39	Palbociclib
Palbociclib 1:1000	0.28	0.17	0.02	-0.15	Palbociclib
Panobinostat	-11.85	-14.46	-13.6	0.86	Panobinostat
Panobinostat 1:10	-11.9	-14.46	-9.3	5.16	Panobinostat
Panobinostat 1:100	-5.8	-5.57	-5.92	-0.35	Panobinostat
Panobinostat 1:1000	0.13	0.49	0.14	-0.35	Panobinostat
Pazopanib hydrochloride	-1.29	-0.98	-1.15	-0.17	Pazopanib
Pazopanib hydrochloride 1:10	-0.21	-0.12	-0.29	-0.17	Pazopanib
Pazopanib hydrochloride 1:100	-0.7	-0.61	-0.68	-0.07	Pazopanib
Pazopanib hydrochloride 1:1000	-0.2	0.06	-0.07	-0.13	Pazopanib
Pemetrexed, Disodium salt, Heptahydrate	-1.7	-1.3	-1.68	-0.38	Pemetrexed
Pemetrexed, Disodium salt, Heptahydrate 1:10	-0.13	-0.07	-0.27	-0.2	Pemetrexed
Pemetrexed, Disodium salt, Heptahydrate 1:100	-0.47	-0.34	-0.47	-0.13	Pemetrexed
Pemetrexed, Disodium salt, Heptahydrate 1:1000	0.49	0.67	0.52	-0.15	Pemetrexed
Pentostatin	-1.55	-1.33	-1.22	0.11	Pentostatin
Pentostatin 1:10	-0.02	-0.17	-0.21	-0.04	Pentostatin
Pentostatin 1:100	-0.57	-0.42	-0.51	-0.09	Pentostatin
Pentostatin 1:1000	0.47	0.38	0.29	-0.09	Pentostatin
Pipobroman	-4.12	-3.84	-4.17	-0.33	Pipobroman
Pipobroman 1:10	-0.09	-0.17	-0.45	-0.28	Pipobroman
Pipobroman 1:100	-0.48	-0.35	-0.36	-0.01	Pipobroman
Pipobroman 1:1000	-0.19	0.09	-0.17	-0.26	Pipobroman
Plerixafor	-0.91	-0.73	-0.88	-0.15	Plerixafor
Plerixafor 1:10	-0.21	0	-0.35	-0.35	Plerixafor
Plerixafor 1:100	0.43	0.68	0.4	-0.28	Plerixafor
Plerixafor 1:1000	0.55	0.79	0.48	-0.31	Plerixafor
Plicamycin	-9.7	-14.46	-12.84	1.62	Plicamycin
Plicamycin 1:10	-10.62	-10.39	-13.86	-3.47	Plicamycin
Plicamycin 1:100	-9.36	-8.47	-9.49	-1.02	Plicamycin
Plicamycin 1:1000	-0.6	-0.46	-0.48	-0.02	Plicamycin
Pomalidomide	0.23	-0.01	0.09	0.11	Pomalidomide
Pomalidomide 1:10	0.45	0.09	0.17	0.08	Pomalidomide
Pomalidomide 1:100	-0.2	-0.24	-0.13	0.12	Pomalidomide
Pomalidomide 1:1000	1.26	0.72	0.41	-0.31	Pomalidomide
Ponatinib	0.41	0.42	0.23	-0.19	Ponatinib
Ponatinib 1:10	0.56	0.43	0.42	-0.01	Ponatinib
Ponatinib 1:100	0.17	-0.05	-0.1	-0.04	Ponatinib
Ponatinib 1:1000	0.74	0.82	0.32	-0.49	Ponatinib
Pralatrexate	-0.67	-1.01	-0.63	0.39	Pralatrexate
Pralatrexate 1:10	0.21	0	-0.01	-0.01	Pralatrexate
Pralatrexate 1:100	-1.15	-1.27	-0.92	0.36	Pralatrexate
Pralatrexate 1:1000	0.59	0.38	0.26	-0.12	Pralatrexate
Procarbazine hydrochloride	0.55	0.44	0.23	-0.21	Procarbazine
Procarbazine hydrochloride 1:10	-0.35	-0.43	-0.49	-0.05	Procarbazine
Procarbazine hydrochloride 1:100	0.28	0.17	0.15	-0.02	Procarbazine
Procarbazine hydrochloride 1:1000	0.51	0.24	0.15	-0.08	Procarbazine
Raloxifene	-0.86	-0.92	-0.61	0.32	Raloxifene
Raloxifene 1:10	0.4	0.05	0.11	0.06	Raloxifene
Raloxifene 1:100	-0.19	-0.22	-0.19	0.04	Raloxifene
Raloxifene 1:1000	0.31	-0.08	0.09	0.17	Raloxifene
Regorafenib	-4.18	-4.06	-3.49	0.58	Regorafenib
Regorafenib 1:10	0.48	0.12	0.32	0.2	Regorafenib
Regorafenib 1:100	0.39	0.37	0.35	-0.02	Regorafenib
Regorafenib 1:1000	0.43	0.15	0.14	-0.01	Regorafenib
Romidepsin	-9.66	-9.81	-9.6	0.21	Romidepsin
Romidepsin 1:10	-8.71	-8.67	-8.4	0.28	Romidepsin
Romidepsin 1:100	-10.35	-11.71	-12.04	-0.33	Romidepsin
Romidepsin 1:1000	-9.66	-11.89	-9.5	2.4	Romidepsin
Sirolimus	0.83	0.63	0.59	-0.04	Sirolimus
Sirolimus 1:10	-0.39	-0.53	-0.13	0.41	Sirolimus
Sirolimus 1:100	-0.63	-1.01	-0.48	0.53	Sirolimus
Sirolimus 1:1000	0.76	0.46	0.44	-0.02	Sirolimus
Sorafenib	-5.39	-5.37	-4.73	0.64	Sorafenib
Sorafenib 1:10	0.1	-0.03	-0.01	0.03	Sorafenib
Sorafenib 1:100	-1.15	-1.02	-0.69	0.34	Sorafenib
Sorafenib 1:1000	0.35	0.13	0.15	0.02	Sorafenib
Streptozocin	-0.1	-0.17	-0.14	0.03	Streptozocin
Streptozocin 1:10	0.45	0.12	0.15	0.04	Streptozocin
Streptozocin 1:100	0.04	-0.25	-0.01	0.24	Streptozocin
Streptozocin 1:1000	0.64	0.33	0.34	0.01	Streptozocin
Sunitinib	0.15	0.2	0.09	-0.11	Sunitinib
Sunitinib 1:10	-0.34	-0.41	-0.44	-0.03	Sunitinib
Sunitinib 1:100	-0.2	-0.17	-0.11	0.06	Sunitinib
Sunitinib 1:1000	0.84	0.8	0.49	-0.31	Sunitinib
Tamoxifen citrate	0.24	-0.05	0.19	0.24	Tamoxifen
Tamoxifen citrate 1:10	3.95	1.07	0.66	-0.4	Tamoxifen
Tamoxifen citrate 1:100	0.13	0.06	-0.1	-0.15	Tamoxifen
Tamoxifen citrate 1:1000	0.73	0.34	0.3	-0.04	Tamoxifen
Temozolomide	0.75	0.46	0.32	-0.14	Temozolomide
Temozolomide 1:10	0.3	0.04	0.04	0.01	Temozolomide
Temozolomide 1:100	-0.5	-0.76	-0.48	0.29	Temozolomide
Temozolomide 1:1000	1.57	1.37	0.73	-0.64	Temozolomide
Temsirolimus	0.66	0.4	0.42	0.03	Temsirolimus
Temsirolimus 1:10	0.63	0.26	0.27	0.01	Temsirolimus
Temsirolimus 1:100	0.01	-0.25	0.1	0.35	Temsirolimus
Temsirolimus 1:1000	1.34	1.04	0.65	-0.4	Temsirolimus
Teniposide	-8.55	-8.61	-7.65	0.97	Teniposide
Teniposide 1:10	-7.7	-7.13	-6.98	0.15	Teniposide
Teniposide 1:100	-7.32	-9.45	-6.47	2.99	Teniposide
Teniposide 1:1000	0.81	0.94	0.43	-0.51	Teniposide
Thalidomide	0.14	-0.22	-0.04	0.18	Thalidomide
Thalidomide 1:10	-0.36	-0.58	-0.47	0.12	Thalidomide
Thalidomide 1:100	-0.13	-0.25	0.04	0.29	Thalidomide
Thalidomide 1:1000	0.57	0.52	0.36	-0.16	Thalidomide
Thioguanine	-2.81	-2.77	-2.62	0.15	Thioguanine
Thioguanine 1:10	-1.02	-0.94	-0.9	0.04	Thioguanine
Thioguanine 1:100	-0.45	-0.39	-0.5	-0.11	Thioguanine
Thioguanine 1:1000	0.78	0.61	0.38	-0.23	Thioguanine
Thiotepa	-5.76	-6.13	-5.79	0.35	Thiotepa
Thiotepa 1:10	-1.32	-1.24	-1	0.24	Thiotepa
Thiotepa 1:100	-0.88	-1.07	-0.84	0.24	Thiotepa
Thiotepa 1:1000	0.94	0.67	0.55	-0.13	Thiotepa
Topotecan hydrochloride	-10.9	-12.88	-13.43	-0.55	Topotecan
Topotecan hydrochloride 1:10	-10.4	-9.95	-9.55	0.4	Topotecan
Topotecan hydrochloride 1:100	-8.53	-8.89	-7.15	1.75	Topotecan
Topotecan hydrochloride 1:1000	0.57	0.49	0.3	-0.19	Topotecan
Trametinib	-12.22	-10.5	-12.49	-1.99	Trametinib
Trametinib 1:10	-11.08	-12.88	-10.89	2	Trametinib
Trametinib 1:100	-7.02	-7.21	-7.81	-0.6	Trametinib
Trametinib 1:1000	-0.92	-0.94	-0.67	0.27	Trametinib
Tretinoin	-0.37	-0.59	-0.42	0.18	Tretinoin
Tretinoin 1:10	-1.13	-1.28	-0.89	0.39	Tretinoin
Tretinoin 1:100	-0.47	-0.59	-0.44	0.16	Tretinoin
Tretinoin 1:1000	0.37	0.03	0.19	0.16	Tretinoin
Triethylenemelamine	-8.55	-9.17	-8.2	0.98	Triethylenemelamine
Triethylenemelamine 1:10	-1.57	-1.5	-1.54	-0.03	Triethylenemelamine
Triethylenemelamine 1:100	-0.86	-0.91	-0.62	0.3	Triethylenemelamine
Triethylenemelamine 1:1000	0.47	0.18	0.35	0.17	Triethylenemelamine
Trifluridine	-1.68	-1.8	-1.54	0.27	Trifluridine
Trifluridine 1:10	-1.46	-1.65	-1.16	0.49	Trifluridine
Trifluridine 1:100	-4.71	-3.34	-2.46	0.89	Trifluridine
Trifluridine 1:1000	0.84	0.56	0.51	-0.04	Trifluridine
Uracil mustard	0.66	0.7	0.52	-0.18	Uracilmustard
Uracil mustard 1:10	0.72	0.73	0.52	-0.21	Uracilmustard
Uracil mustard 1:100	0.28	0.32	0.12	-0.2	Uracilmustard
Uracil mustard 1:1000	0.67	0.62	0.49	-0.13	Uracilmustard
Valrubicin	-10.51	-8.96	-10.42	-1.47	Valrubicin
Valrubicin 1:10	-8.65	-9.81	-7.51	2.3	Valrubicin
Valrubicin 1:100	-0.16	-0.1	-0.31	-0.21	Valrubicin
Valrubicin 1:1000	0.34	0.53	0.35	-0.18	Valrubicin
Vandetanib	-0.79	-0.77	-0.74	0.03	Vandetanib
Vandetanib 1:10	0.4	0.21	0.32	0.11	Vandetanib
Vandetanib 1:100	0.21	0.13	0.16	0.03	Vandetanib
Vandetanib 1:1000	0.28	0.2	0.14	-0.06	Vandetanib
Vemurafenib	-1.11	-1.33	-0.75	0.58	Vemurafenib
Vemurafenib 1:10	0.26	0.08	0.19	0.11	Vemurafenib
Vemurafenib 1:100	0.24	0.14	0.23	0.09	Vemurafenib
Vemurafenib 1:1000	0.15	0.22	0.15	-0.07	Vemurafenib
Vinblastine sulfate	-9.79	-8.64	-9.32	-0.68	Vinblastine
Vinblastine sulfate 1:10	-8.41	-8.04	-8.08	-0.04	Vinblastine
Vinblastine sulfate 1:100	-9.18	-9.17	-9.48	-0.31	Vinblastine
Vinblastine sulfate 1:1000	-9.71	-9.43	-9.75	-0.32	Vinblastine
Vincristine sulfate	-9.7	-9.47	-9.8	-0.33	Vincristines
Vincristine sulfate 1:10	-8.83	-8.18	-8.55	-0.37	Vincristines
Vincristine sulfate 1:100	-9.67	-9.82	-10.27	-0.45	Vincristines
Vincristine sulfate 1:1000	-8.25	-8.54	-8.43	0.11	Vincristines
Vinorelbine tartrate	-8.98	-9.19	-9.41	-0.22	Vinorelbine
Vinorelbine tartrate 1:10	-10.68	-10.65	-10.18	0.47	Vinorelbine
Vinorelbine tartrate 1:100	-0.41	-0.08	-0.72	-0.65	Vinorelbine
Vinorelbine tartrate 1:1000	-0.8	-0.79	-0.73	0.06	Vinorelbine
Vismodegib	0.2	-0.03	0.16	0.19	Vismodegib
Vismodegib 1:10	0.31	0.26	0.27	0.01	Vismodegib
Vismodegib 1:100	-0.15	-0.19	-0.22	-0.03	Vismodegib
Vismodegib 1:1000	0.3	0.1	0.2	0.1	Vismodegib
Vorinostat	-8.88	-9.85	-9.72	0.13	Vorinostat
Vorinostat 1:10	-0.44	-0.3	-0.41	-0.11	Vorinostat
Vorinostat 1:100	0.46	0.29	0.38	0.09	Vorinostat
Vorinostat 1:1000	-0.25	-0.22	-0.16	0.06	Vorinostat
Zoledronic acid	-5.03	-5.24	-5.58	-0.34	Zoledronicacid
Zoledronic acid 1:10	0.35	0.23	0.34	0.11	Zoledronicacid
Zoledronic acid 1:100	0.61	0.44	0.43	-0.01	Zoledronicacid
Zoledronic acid 1:1000	0.21	0.26	0.09	-0.17	Zoledronicacid
